# Supplementary material for: Quantitative proteome-level analysis of paulownia witches’ broom disease with methyl methane sulfonate assistance reveals diverse metabolic changes during the infection and recovery processes
Source: PeerJ. 2017 Jul 3;5:e3495. doi: 10.7717/peerj.3495 (PMC5497676; doi:10.7717/peerj.3495)
Supplement: Table S1 [file peerj-05-3495-s006.xlsx]

## Sheet: Sheet1
Table S1 Overview of the sequencing and assembly of the transcriptome of P. fortunei.
Statistics of Data Production	PF	PFI	PFI-20	PFI-60
Number of high-quality reads	57846728	58451828	51667214	51417240
GC percentage (%)	0.463	0.4639	0.4691	0.4639
Contigs	PF	PFI	PFI-20	PFI-60
Number of contigs	174105	155253	156983	175247
Mean length of contigs (nt)	358	361	349	339
Length of N50 (bp)	670	740	718	654
Unigenes	PF	PFI	PFI-20	PFI-60
Number of unigenes	116756	91985	88795	103300
Length of N50 (bp)	1964	1714	1815	1899
Average length of all unigenes (bp)	1016	863	979	1029
ALL-Unigenes
Number of all unigenes	120963
Length of N50 (bp)	2133
Average length of all unigenes (bp)	1346
