# Supplementary material for: Quantitative proteome-level analysis of paulownia witches’ broom disease with methyl methane sulfonate assistance reveals diverse metabolic changes during the infection and recovery processes
Source: PeerJ. 2017 Jul 3;5:e3495. doi: 10.7717/peerj.3495 (PMC5497676; doi:10.7717/peerj.3495)
Supplement: Table S2 [file peerj-05-3495-s007.xlsx]

## Sheet: Sheet1
Table S2 Primer sequence used in this study
		Sense Primer	Anti-sense Primer
qRT-pcr	Unigene5139_All	CAAGGTGTCTGGGCTACTAAAG	GAATATGGAGGAACTGAAGTGAAG
	CL832.Contig4_All	CGCCCACTGCTACTAAATC	AGATACTGCTATACAATTACAACC
	CL5429.Contig1_All	ATCGGTGAGGATATAGCC	TGCCTTGATGACTAATGC
	Unigene2121_All	CCTCAATGCTCTGGTAGTG	TTGCTGTCTTCTCTATGGC
	CL4998.Contig1_All	CTCAACAGCCTTCACCAC	GCCGACGAGAACTTCATC
	CL5710.Contig2_All	TCAAGAATCAAGGCTACCAATG	TCACGGTTCCTCCTCTCC
	Unigene7821_All	CTTCCACATTGTCCAGTATCG	TCCTACCTTCCTGAACTAACC
	CL1900.Contig1_All	GTATTACTTCTTGTCCGTGTTG	CTTGAACCATCTCTTGTCTCC
	CL896.Contig2_All	GAGGACGGCTTGTAATGTTAG	TTAGACTTGGTTATAGGTGAATGG
	CL7006.Contig1_All	TTATAGTTCGCTGTCATCTG	TGGTTATGGAGAGCAAGG
	Primer	Sequences(5′-3′)
nest-pcr	R16mF1	CATGCAAGTCGAACGGA
	R16mR1	CTTAACCCCAATCATCGA
	R16F2	ACGACTGCTAAGACTGG
	R16R2	GCGGTGTGTACAAACCCCG
