# Supplementary material for: Quantitative proteome-level analysis of paulownia witches’ broom disease with methyl methane sulfonate assistance reveals diverse metabolic changes during the infection and recovery processes
Source: PeerJ. 2017 Jul 3;5:e3495. doi: 10.7717/peerj.3495 (PMC5497676; doi:10.7717/peerj.3495)
Supplement: Table S3 [file peerj-05-3495-s008.xlsx]

## Sheet: all_protein
Table S3 Overview of the all identified proteins
	Accession	Desription	Mass	Seq	Score	Cov	Samerepeats	Spectrum	Unique Spectrum	Peptide	Unique Peptide	repeat1@Ratio@PF_113-VS-PFI_116	repeat2@Ratio@PF_113-VS-PFI_116	repeat1@QuantNumber@PF_113-VS-PFI_116	repeat2@QuantNumber@PF_113-VS-PFI_116	repeat1@Sig@PF_113-VS-PFI_116	repeat2@Sig@PF_113-VS-PFI_116	repeat1@Ratio@PFI-20_117-VS-PFI-60_118	repeat2@Ratio@PFI-20_117-VS-PFI-60_118	repeat1@QuantNumber@PFI-20_117-VS-PFI-60_118	repeat2@QuantNumber@PFI-20_117-VS-PFI-60_118	repeat1@Sig@PFI-20_117-VS-PFI-60_118	repeat2@Sig@PFI-20_117-VS-PFI-60_118	repeat1@Ratio@PFI_116-VS-PFI-20_117	repeat2@Ratio@PFI_116-VS-PFI-20_117	repeat1@QuantNumber@PFI_116-VS-PFI-20_117	repeat2@QuantNumber@PFI_116-VS-PFI-20_117	repeat1@Sig@PFI_116-VS-PFI-20_117	repeat2@Sig@PFI_116-VS-PFI-20_117	repeat1@Ratio@PF_113-VS-PFI-60_118	repeat2@Ratio@PF_113-VS-PFI-60_118	repeat1@QuantNumber@PF_113-VS-PFI-60_118	repeat2@QuantNumber@PF_113-VS-PFI-60_118	repeat1@Sig@PF_113-VS-PFI-60_118	repeat2@Sig@PF_113-VS-PFI-60_118	Accession	NCBInr Identity	NCBInr E_Value	NCBInr Accession	NCBInr Description	Uniprot_Swissprot Identity	Uniprot_Swissprot E_Value	Uniprot_Swissprot Accession	Uniprot_Swissprot Description	Uniprot_Tremble Identity	Uniprot_Tremble E_Value	Uniprot_Tremble Accession	Uniprot_Tremble Description	Protein_or_Domain
1	CL2867.Contig1_All	59 502 RecName: Full=Histone H2B >gi|2558962|gb|AAB97163.1| histone H2B1 [Gossypium hirsutum]	25203	MAPKAAEKKPAEKKPAAEKAPAAEKSPAEKKPKAGKKLPKEGGAVAGDKKKKRVKKSTETYKIYIFKVLKQVHPDIGISSKAMGIMNSFINDIFEKLAQEASRLARYNKKPTITSREIQTAVRLVLPGELAKHAVSEGTKAVTKFTSS	380|406	23.6|23.6	8|8	23|19	23|19	3|3	3|3	0.669	0.644	17	17	*	-	0.989	0.896	17	15	-	-	0.977	0.939	17	16	-	-	0.668	0.51	17	15	*	*	CL2867.Contig1_All	100	1e-46	gi|225435032|ref|XP_002284277.1|	PREDICTED: probable histone H2B.1 isoform 1 [Vitis vinifera] >gi|147858650|emb|CAN78863.1| hypothetical protein VITISV_032908 [Vitis vinifera]	98.91	6e-48	sp|O22582|H2B_GOSHI	Histone H2B OS=Gossypium hirsutum GN=HIS2B PE=2 SV=3	100	1e-45	A5BCC0	A5BCC0_VITVI Histone H2B OS=Vitis vinifera GN=VIT_06s0004g04300 PE=3 SV=1	-
2	CL6286.Contig2_All	203 3325 PREDICTED: nuclear pore complex protein Nup98-Nup96-like isoform 1 [Vitis vinifera]	118715	MFGSNPFGQSSSSPFGSQPVFGQTNTASSNPFAPKPFGSTSPFGSQTGGSIFGGMSTGVFGAQSSSPLGSTSVFGASSSPAFGSSTPTFGASSGSAFGNSSSAFGGSSVFGQKPTFGAFGSNTTQTSPFGSSFQQSQPAFGSNLFGSSTPFGAPSQPAFGSSSSPAFGAPSTPAFGGTSTPAFGSTASPTFGSTTGGFGVSSSPFGSSTPAFGAPSTPAFGATSTPAFGATTTPAFGATTTPAFGASTTPAFGATTTPAFGASATPAFGASSTPPFNFGSSPAFGQSTSAFGSSPFGTASSFGAQSAAFGAQTTTPTFGSSGFGQSAFGGQRGGSRVSPYSPTPETDGATGTQPAGKLESISAMPVYKDKSHEELRWEDYQLGDKGGPAPAGQASAVVG…	-|90	-|2.0	-|1	-|1	-|1	-|1	-|1	-	---	-	1	-	-	-	---	-	-	-	-	-	---	-	1	-	-	-	---	-	-	-	-	CL6286.Contig2_All	83.46	1e-16	gi|225426485|ref|XP_002277144.1|	PREDICTED: nuclear pore complex protein Nup98-Nup96-like isoform 1 [Vitis vinifera]	41.61	1e-23	sp|Q54EQ8|NUP98_DICDI	Nuclear pore complex protein Nup98-Nup96 OS=Dictyostelium discoideum GN=nup98 PE=3 SV=1	81.48	6e-13	I1M2V1	I1M2V1_SOYBN Uncharacterized protein OS=Glycine max GN=Gma.25150 PE=4 SV=1	-
3	CL12545.Contig1_All	195 1025 minus strand PREDICTED: prohibitin-1, mitochondrial [Vitis vinifera]	34616	MGSSQAAASFLTNIARAAFSLGIGATVLNSSLYTVDGGQRAVLFDRFRGVIEDTVGEGTHFLIPWLQKPFIFDIRTRPHTFSSVSGTKDLQMVNLTLRVLSRPEVSRLPDIFKTLGLEYDEKVLPSIGNEVLKAVVAQFNADQLLTERPHVSALVRESLIRRAKDFNIVLDDVAITHLSYGAEFSKAVEQKQVAQQEAERSKFVVAKAEQERRAAIIRAEGESESAKLISDATAAAGMGLIELRKIEAAKDNVSSMCRNGNVVYLPSNNNMLLGINP	117|282	10.1|10.1	-|-	3|8	3|6	2|2	2|1	1.229	1.231	3	2	-	-	1.224	1.827	2	2	-	-	1.041	0.873	3	3	-	-	1.662	1.065	2	3	-	-	CL12545.Contig1_All	90.22	7e-122	gi|71370257|gb|AAZ30376.1|	PHB1 [Nicotiana benthamiana]	81.88	4e-111	sp|O04331|PHB3_ARATH	Prohibitin-3, mitochondrial OS=Arabidopsis thaliana GN=PHB3 PE=1 SV=1	90.22	7e-121	Q45Q24	Q45Q24_NICBE PHB1 OS=Nicotiana benthamiana PE=2 SV=1	SPAC1782.06c
4	Unigene5829_All	204 824 minus strand glyceraldehyde-3-phosphate dehydrogenase C subunit [Gossypium hirsutum]	29041	MAKIKIGINGFGRIGRLVARVALQSDDVELVAVNDPFITTDYMTYMFKYDSVHGQWKKHELKVKDSKTLLFGDKPVTVFGVRNPEEIPWAEAGADYVVESTGVFTDKDKAAAHLKGGAKKVVISAPSKDAPMFVVGVNEKEYKPDINIVSNASCTTNCLAPLAKVLNDRFGIVEGLMTTVHSITATQKTVDGPSMKDWRGGRAASFN	600|433	22.2|22.2	1|1	24|18	1|2	3|3	1|1	---	0.523	1	2	-	-	---	1.222	1	2	-	-	---	1.525	1	2	-	-	---	0.959	1	2	-	-	Unigene5829_All	94.69	5e-105	gi|211906518|gb|ACJ11752.1|	glyceraldehyde-3-phosphate dehydrogenase C subunit [Gossypium hirsutum]	93.24	5e-102	sp|Q7FAH2|G3PC2_ORYSJ	Glyceraldehyde-3-phosphate dehydrogenase 2, cytosolic OS=Oryza sativa subsp. japonica GN=GAPC2 PE=1 SV=1	94.69	5e-104	D2D332	D2D332_GOSHI Glyceraldehyde-3-phosphate dehydrogenase C subunit OS=Gossypium hirsutum PE=2 SV=1	SPBC32F12.11
5	CL4264.Contig3_All	91 1365 FtsZ-like protein [Nicotiana tabacum]	50763	MATLRLSNPAPELASSHSSTASISVGFSPLLSKNARCDISFSRSRRKSFSNFKRHRSGVYSSFIPMDSAKIKVLGVGGGGNNAVNRMIGSGLQGVDFYAINTDAQALLQSAAENPIQIGELLTRGLGTGGNPLLGEQAAEESKETIANALKGSDMVFITAGMGGGTGSGAAPVVAQIAKEAGYLTVGVVTYPFSFEGRKRSVQALEAIEKLQKNVDTLIVIPNDRLLDIADEHTPLQDAFLLADDVLRQGVQGISDIITIPGLVNVDFADVKAVMKNSGTAMLGVGVSSSKNRAEEAAEQATMAPLIGSSIHSATGVVYNITGGKDITLQEVNRVSQVVTSLADPSANIIFGAVVDERFNGEIHVTIIATGFTQSFQKTLLTDPRGAKLVDKATGRPDS…	375|204	9.6|11.8	-|-	7|5	1|1	3|4	1|1	---	---	1	1	-	-	---	---	1	1	-	-	---	---	1	1	-	-	---	---	1	1	-	-	CL4264.Contig3_All	95.51	8e-149	gi|4753845|emb|CAB41987.1|	FtsZ-like protein [Nicotiana tabacum]	91.62	3e-145	sp|Q42545|FTSZ1_ARATH	Cell division protein FtsZ homolog 1, chloroplastic OS=Arabidopsis thaliana GN=FTSZ1 PE=1 SV=2	95.51	2e-147	Q9M437	Q9M437_TOBAC Chloroplast FtsZ-like protein OS=Nicotiana tabacum GN=ftsZ PE=2 SV=1	sll1633
6	CL7508.Contig1_All	3335 6175 minus strand PREDICTED: villin-2-like [Vitis vinifera] >CL7508.Contig2_All 4348 7188 minus strand PREDICTED: villin-2-like [Vitis vinifera] >CL7508.Contig3_All 3955 6795 minus strand PREDICTED: villin-2-like [Vitis vinifera] >C	128603	MSSSAKALEPAFQGAGQRIGTEIWRIENFQPVPLPKSDYGKFYSGDSYIILQTSSGKGGAYLYDIHFWLGKDTSQDEAGTAAIKTVELDAVLGGRAVQYRELQGHESDKFLSYFKPCIIPLEGGVASGFKKPEEEEFETRLYICRGKRVVRLKQVPFSRSSLNHDDVFILDTKGKIYQFNGANSNIQERAKALEVIQFLKEKYHEGKCDVAIVDDGKLQAETDSGEFWVLFGGFAPIGKKVATEDDIIPEKTPAQLYSIVDGLVKSLDGELSKSILENNKCYLLDCGAEVFVWVGRVTQVDERKAAIQAAEDFVASQNRPKSTHITRLIQGYETHSFKSNFDSWPSGSAPSVAEEGRGKVAALLKQQGGAMKGANKSAPVNEEVPPLLEGGGKIEVWRI…	232|385	6.5|12.7	1|1	9|17	1|2	5|9	1|1	---	---	1	1	-	-	---	---	1	1	-	-	---	---	1	1	-	-	---	---	1	1	-	-	CL7508.Contig1_All	85.6	3e-131	gi|357509713|ref|XP_003625145.1|	Villin-2 [Medicago truncatula] >gi|355500160|gb|AES81363.1| Villin-2 [Medicago truncatula]	68.57	0	sp|O81645|VILI3_ARATH	Villin-3 OS=Arabidopsis thaliana GN=VLN3 PE=1 SV=2	85.6	4e-130	G7KTI5	G7KTI5_MEDTR Villin-2 OS=Medicago truncatula GN=MTR_7g091460 PE=4 SV=1	-
7	CL2017.Contig2_All	266 1630 PREDICTED: ruvB-like 1-like [Vitis vinifera] >CL2017.Contig5_All 265 1629 minus strand PREDICTED: ruvB-like 1-like [Vitis vinifera]	60329	MKIEEVQSTTKKQRIATHTHIKGLGLEPNGTAIPLAAGFVGQASAREAAGLVVDMIRQKKMAGRALLLAGPPGTGKTALALGISQELGSKVPFCPMVGSEVYSSEVKKTEVLMENFRRAIGLRIKENKEVYEGEVTELSPEETESVTGGYGKSISHVIIGLKTVKGTKQLKLDPTIYDALIKEKVAVGDVIYIEANSGAVKRVGRSDAFATEFDLEAEEYVPLPKGEVHKKKEIVQDVTLHDLDAANARPQGGQDILSLMGQMMKPRKTEITDKLRQEINKVVNRYIDEGVAELVPGVLFIDEVHMLDMECFSYLNRALESSLSPIVIFATNRGICNVRGTDMTSPHGIPVDLLDRLVIIRTETYGPAEMIQILAIRAQVEELKIDEESLAYLGEIGQQ…	34|27	5.1|2.6	-|-	4|2	4|2	2|1	2|1	1.015	---	3	-	-	-	1.352	---	3	-	-	-	0.936	---	3	-	-	-	1.254	---	3	-	-	-	CL2017.Contig2_All	96.34	0	gi|356523042|ref|XP_003530151.1|	PREDICTED: probable plastidic glucose transporter 3-like [Glycine max]	74.95	0	sp|P60123|RUVB1_RAT	RuvB-like 1 OS=Rattus norvegicus GN=Ruvbl1 PE=1 SV=1	95.16	0	I1KGM6	I1KGM6_SOYBN Uncharacterized protein OS=Glycine max PE=4 SV=1	SPAPB8E5.09
8	Unigene7927_All	118 534 40S ribosomal protein s17 [Camellia sinensis]	20390	MGRVRTKTVKKSSRQVIERYYSKMTLDFHTNKKILEEVAIIPSKRLRNKIAGFSTHLMKRIQKGPVRGISLKLQEEERERRMDFVPDESAIKVDRIEVDQETVDLLESLGMKDLPGVVLKEDQGPISVAPPMNYGRGGG	257|178	22.3|34.5	1|-	13|9	13|9	3|4	3|4	0.903	0.633	10	7	-	-	1.017	0.87	10	6	-	-	1.056	1.288	10	6	-	*	0.948	1.008	10	7	-	-	Unigene7927_All	89.15	6e-59	gi|76573345|gb|ABA46777.1|	40S ribosomal protein S17-like protein [Solanum tuberosum]	85.82	2e-59	sp|P49215|RS17_SOLLC	40S ribosomal protein S17 OS=Solanum lycopersicum GN=RPS17 PE=2 SV=3	89.15	7e-58	Q3HRX4	Q3HRX4_SOLTU 40S ribosomal protein S17-like protein OS=Solanum tuberosum PE=2 SV=1	SPBC839.05c
9	CL8884.Contig1_All	305 2131 PREDICTED: uncharacterized protein LOC100242198 [Vitis vinifera]	70899	AATSSRSGGGGASADSYIGSLISLTSKSEIRYEGILYNINTEESSIGLRNVRSFGTEGRKKDGPQVPPSDKIYEYILFRGSDIKDLQVKASPPVQTTPPINSDPAIIQSHYPRPTTTPTSVPAAPSGPLVDHGSHSAQMGLPGSTFQSNLHLYQPGGNLNSWGPSPPNANGSGLAMPMYWQGFYGTPNGLPQLPQQSLLRPPPGLSIPPSMQQMQFPGFNSSLPMAASTLPTSTLPMAASSLPTSTLPDYHSSLVPNSASSSSLTSTSLTASTLSLNVPPLQPVSLVSETMINPLPNKAPLSAIPTSTPSSSLPSLAHLPTSVSDNAGVASVASKPIAIPGRPVALPQQAISQPGTSVSGPSGSVLTETPTPSLITPGQLLHSGPATVSAPQTLQTMQK…	71|239	3.0|9.5	4|3	1|9	1|9	1|4	1|4	---	1.002	1	8	-	-	---	0.809	1	6	-	-	---	1.035	1	7	-	-	---	0.812	1	7	-	-	CL8884.Contig1_All	93.33	2e-07	gi|356502497|ref|XP_003520055.1|	PREDICTED: pentatricopeptide repeat-containing protein At4g13650-like [Glycine max]	71.76	7e-55	sp|Q9C658|DCP5_ARATH	Protein decapping 5 OS=Arabidopsis thaliana GN=DCP5 PE=1 SV=1	82.42	2e-35	F2CV11	F2CV11_HORVD Predicted protein (Fragment) OS=Hordeum vulgare var. distichum PE=2 SV=1	-
10	CL12278.Contig2_All	67 1602 RecName: Full=Adenylosuccinate synthetase, chloroplastic; Short=AMPSase; Short=AdSS; AltName: Full=IMP--aspartate ligase; Flags: Precursor >gi|37983671|gb|AAR06294.1| adenylosuccinate synthase [Nicotiana tabacum]	63395	SSLSLSVSAVTAAMSLSSSTSISYAPRTWNGTHSGKVGGSHPHLQLSLPNNKQQRTIICSAAANRGAAVIEQGTSQSDSGLSRIGSLSQVSGVLGCQWGDEGKGKLVDILAKHFDIVARCQGGANAGHTIYNAEGKKFALHLVPSGILNEETICVIGNGVVVHLPGFFKEVDGLESNGVSCKGRILVSDRAHLLFDFHQVVDGLREAELAKSLIGTTRRGIGPCCSSKVIRNGIRVSDLRHMDTFPQKLDLLLSDAASRFQGFNYSPDMLREEVEQYKRFAERLEPFITDTVHYMNDAIYQKQKILVEGGQATMLDIDFGTYPFVTSSSPSAGGICTGLGIAPRIVGDLIGVVKAYTTRVGSGPFPTEILGKGGDLLRFAGQEFGTTTGRPRRCGWLDI…	86|-	2.0|-	-|-	4|-	4|-	1|-	1|-	1.442	-	4	-	-	-	0.831	-	4	-	-	-	1.056	-	4	-	-	-	1.187	-	4	-	-	-	CL12278.Contig2_All	86.77	0	gi|308154366|sp|B9IJ21.1|PURA_POPTR	RecName: Full=Adenylosuccinate synthetase, chloroplastic; Short=AMPSase; Short=AdSS; AltName: Full=IMP--aspartate ligase; Flags: Precursor	86.77	0	sp|B9IJ21|PURA_POPTR	Adenylosuccinate synthetase, chloroplastic OS=Populus trichocarpa GN=PURA PE=3 SV=1	85.19	0	I1N933	I1N933_SOYBN Uncharacterized protein OS=Glycine max GN=Gma.20675 PE=4 SV=1	SPAC144.03
11	CL2938.Contig1_All	371 4513 minus strand protoporphyrin IX:Mg Chelatase [Antirrhinum majus]	181607	MASLVSSPFTLPNSKVEHLSSISQKHYFLHSFLPKKLNQTNTQSSRKFKCAAIGNGLFTQTTPEVRRIVPDKSKGLPTVKVVYVVLEAQYQSSLTAAVQSLNKNGEYASFEVVGYLVEELRDENTYKTFCKDLKDANIFIGSLIFVEELALKVKAAVEKERERLDAVLVFPSMPEVMRLNKLGSFSMSQLGQSKSPFFQLFKKNKSSAGFADSMLKLVRTLPKVLKYLPSDKAQDARMYILSLQFWLGGSPNNLENFLKMISGSYVPALKGTKIDYSDPVLYLDSGIWHPLAPCMYDDVKEYLNWYGTRRDANEQLKSRNAPVVGLVLQRSHIVTGDESHYVAVIMELEARGAKVIPIFAGGLDFSGPVERYFIDPITKKPMVNSVVSLTGFALVGGPA…	24|229	0.6|3.0	1|1	1|6	1|6	1|3	1|3	---	1.594	-	5	-	-	---	1.383	-	4	-	-	---	0.889	-	4	-	-	---	1.867	-	5	-	*	CL2938.Contig1_All	96.6	8e-82	gi|307590975|gb|ADN65135.1|	magnesium chelatase H subunit [Prunus avium]	86.48	0	sp|Q9FNB0|CHLH_ARATH	Magnesium-chelatase subunit ChlH, chloroplastic OS=Arabidopsis thaliana GN=CHLH PE=1 SV=1	93.95	0	A9PEB4	A9PEB4_POPTR Putative uncharacterized protein OS=Populus trichocarpa PE=2 SV=1	all4365
12	Unigene7821_All	70 606 minus strand ribulose-1,5-bisphosphate carboxylase/oxygenase small subunit [Panax ginseng]	24157	MASSVISSTAAVVAARASPAQASMVAPFTGLKPASAFPVTKKSNDITSLASNGGRVQCMKVWPTVGLKKYETLSYLPELTQEQLAKEIDYLLRLKLIPCIEFELEHGFVYRQHHNSPGYYDGRYWTMWKLPMFGCTDSAQVLVELEEAKKAYPNGFIRIIGFDNVRQVQCISFIAYKPP	718|407	30.7|22.9	-|-	65|41	28|13	7|5	4|3	0.605	0.746	23	13	*	-	0.756	0.657	22	12	*	*	1.122	1.423	22	12	-	*	0.355	0.812	22	13	-	-	Unigene7821_All	84.21	5e-74	gi|462411201|gb|EMJ16250.1|	hypothetical protein PRUPE_ppa012123mg [Prunus persica]	84.42	5e-35	sp|P13951|RBS_SINAL	Ribulose bisphosphate carboxylase small chain (Fragment) OS=Sinapis alba GN=RBCS PE=3 SV=1	83.66	9e-73	D1MZ06	D1MZ06_EUCGL Ribulose bisphosphate carboxylase small chain OS=Eucalyptus globulus GN=EgRBCS1 PE=2 SV=1	slr0012
13	CL786.Contig3_All	270 1295 minus strand PREDICTED: NADP-dependent alkenal double bond reductase P2 [Vitis vinifera] >gi|147792339|emb|CAN61471.1| hypothetical protein VITISV_043825 [Vitis vinifera]	45700	EVTNNKQVILNNYVNGPPKESDMLLRTSTIKLKIPDGCHGALLVKNLYLSCDPYMRNRMSKIVGSYIDSFAPGSPITGYGVARLVDSSNPNFKKGDLIWGMTGWEEYSLIKSTEGLFKIQHTDVPLSYYTGILGMPGTTAYCGFYEVCSPQKGETVFISAASGAVGQLVGQFAKLLGCYVVGSAGSKDKVDLLKKKFGFDDAFNYKEEPDLNAALKRFFPDGIDIYFENVGGKMLDAVLLNMRLHGRIAACGMISQYNLEEPEGVRNLFCLVTKRIRMEGFLVFDYYHLYPKYVDMVLPLIKEGNITYAEDIAEGLESAPGALIGLFSGRNIGKQVVVVAHE	27|43	2.9|2.9	5|5	1|1	1|1	1|1	1|1	---	---	1	1	-	-	---	---	-	-	-	-	---	---	1	1	-	-	---	---	-	-	-	-	CL786.Contig3_All	80.69	2e-95	gi|296084342|emb|CBI24730.3|	unnamed protein product [Vitis vinifera]	68.9	7e-140	sp|Q39173|P2_ARATH	NADP-dependent alkenal double bond reductase P2 OS=Arabidopsis thaliana GN=P2 PE=2 SV=2	78.65	3e-160	A5BKL3	A5BKL3_VITVI Putative uncharacterized protein OS=Vitis vinifera GN=VIT_05s0094g01120 PE=4 SV=1	VNG0815G
14	Unigene15028_All	199 1050 hypersensitive-induced response protein [Carica papaya]	37353	MGNLFCCVQVDQSTVAIKERFGKFDEVLEPGCHCLPWFLGSQLAGHLSLRLQQLDVRCETKTKDNVFVNVVASVQYRALAGKANDAFYKLSNTRSQIQAYVFDVIRASVPKLNLDDVFEQKNEIAKAVEDELEKAMSAYGYEIVQTLIVDIEPDEHVKRAMNEINAAARLRVAANEKAEAEKILQIKRAEGEAEAKYLSGLGIARQRQAIVDGLRDSVLGFSVNVPGTTAKDVMDMVLVTQYFDTMKEIGATSKSSAVFIPHGPGAVRDVASQIRDGLLQASQH	74|-	9.2|-	-|-	2|-	2|-	2|-	2|-	0.732	-	2	-	-	-	---	-	1	-	-	-	1.355	-	2	-	-	-	---	-	1	-	-	-	Unigene15028_All	96.83	2e-162	gi|151347473|gb|ABS01349.1|	hypersensitive-induced response protein [Carica papaya]	92.55	1e-153	sp|Q9FM19|HIR1_ARATH	Hypersensitive-induced response protein 1 OS=Arabidopsis thaliana GN=HIR1 PE=1 SV=1	96.83	2e-161	A6YGE4	A6YGE4_CARPA Hypersensitive-induced response protein OS=Carica papaya PE=2 SV=1	SP2156
15	CL325.Contig4_All	332 1882 minus strand beta-glucosidase [Olea europaea subsp. europaea]	69322	QVPKYIGSRLTRHDFPQDFVFCAATSAYQVEGGYAEGRRSMSNWDVFGLQRPAKISDGSNGCVAINHYNQYEEDVALMKKLGLDAYRLSIAWSRILPGGRLSAGVNREGVKFYNDLIDFLLSKGIEPFVTIFHFDVPQCLEDEYGGFLDSKIVQDFAEYAEVCFFEFGDRVKFWITENEPWTFTHNGYITGGFPPAHGSASVQPNGTNVIKHRCCRGVDNTCVSGDAGTEPYKVAHNLILAHAVAVDIYRKKFQAVQGGKIGVTNMTTWYDPYSEHKQDIAAASRAVDFMWGWFVAPIVTGDYPPVMRERVGKRLPKFTPEETKLVKGSYDFIGMNYYTTNWAAYKPTPPCTPPTYYTDQEVEFFTERNGVQIGEQAGSDWLFIVPYGIFKLLVHTKNA…	38|-	2.9|-	-|-	2|-	1|-	2|-	1|-	---	-	-	-	-	-	---	-	-	-	-	-	---	-	-	-	-	-	---	-	-	-	-	-	CL325.Contig4_All	56.98	1e-170	gi|25989474|gb|AAL93619.1|	beta-glucosidase [Olea europaea subsp. europaea]	52.94	1e-144	sp|Q7XKV4|BGL12_ORYSJ	Beta-glucosidase 12 OS=Oryza sativa subsp. japonica GN=BGLU12 PE=2 SV=2	56.98	1e-169	Q8GVD0	Q8GVD0_OLEEU Beta-glucosidase OS=Olea europaea subsp. europaea GN=bglc PE=2 SV=1	CAC0385
16	CL266.Contig3_All	769 2364 mitochondrial benzaldehyde dehydrogenase [Antirrhinum majus]	69453	MAARRISSLVSRSLPLLSRGGKQTYVGRGIYRYSTAAALEDPIKPPVSVQYDKLLINGQFVDAASGKTFPTLDPRTGEVIAYVAEGDAEDINRAVAAARKAFDEGPWPKMTAYERQRILLRFADLVEKHNDEIAALETWDNGKPYEQSAQTEVPMFVRLFRYYAGWADKIHGLTIPADGSLHVQTLHEPIGVAGQIIPWNFPLLMFAWKVGPALACGNTIVLKTAEQTPLSALLVSKLLHEAGLPDGVLNVVPGFGPTAGAALCSHMDVDKLAFTGSTDTGKIVLELAAKSNLKPVTLELGGKSPFIVCEDADVDKAVELAHFALFFNQGQCCCAGSRTYVHEKVYDEFIEKAKARAVKRTVGDPFKAGMEQGPQIDAEQFEKILRYIRSGKESGATLE…	453|276	22.2|17.3	-|-	28|14	28|14	10|8	10|8	1.165	1.014	18	10	-	-	0.953	1.066	17	9	-	-	0.843	0.935	18	10	-	-	0.877	1.041	17	10	-	-	CL266.Contig3_All	90.29	0	gi|223452696|gb|ACM89738.1|	mitochondrial benzaldehyde dehydrogenase [Antirrhinum majus]	83.07	0	sp|Q8S528|AL2B7_ARATH	Aldehyde dehydrogenase family 2 member B7, mitochondrial OS=Arabidopsis thaliana GN=ALDH2B7 PE=2 SV=2	90.29	0	C7A2A0	C7A2A0_ANTMA Mitochondrial benzaldehyde dehydrogenase OS=Antirrhinum majus GN=BALDH PE=2 SV=1	BH0539
17	CL2359.Contig1_All	171 2432 PREDICTED: DEAD-box ATP-dependent RNA helicase 3, chloroplastic [Vitis vinifera] >gi|296089875|emb|CBI39694.3| unnamed protein product [Vitis vinifera]	95529	SSSIIGVSSIYQTNPSLDHAKRPTSTPPLSFHFSTAHNPFRAFYSPARLKSAGGASNSFVASAVFTPNSSVLSEEAFKGLEGFGKGAVDVSESEYEESEGELGEREAGNEDELDVSKLGLPQRLVDTLEKRGITKLFPIQRAVLVPALEGRDIIARAKTGTGKTLAFGIPILKGLDDAEQERGFLRRGRLPKVLVLAPTRELAKQVEKEFKESAPYLNTVCIYGGVSYNTQENALSRGVDVVVGTPGRIIDLINNNNLKLGEVQYLVLDEADQMLAVGFEEDVEVILEKLPSGRQSMLFSATMPGWVKKLARKFLNNPLTIDLVGDQEEKLAEGIKLYAIPTTATSKRTILGDLVTVYAKGGKTIVFTQTKRDADEVSLALTNSIASEALHGDISQHQR…	-|95	-|6.1	-|1	-|4	-|4	-|3	-|3	-	1.108	-	3	-	-	-	1	-	3	-	-	-	0.931	-	3	-	-	-	1.109	-	3	-	-	CL2359.Contig1_All	83.3	0	gi|212274773|ref|NP_001130659.1|	uncharacterized protein LOC100191761 [Zea mays]	80.91	0	sp|Q0DM51|RH3_ORYSJ	DEAD-box ATP-dependent RNA helicase 3, chloroplastic OS=Oryza sativa subsp. japonica GN=Os03g0827700 PE=2 SV=2	83.3	0	B4FA24	B4FA24_MAIZE Putative uncharacterized protein OS=Zea mays PE=2 SV=1	DR1624
18	CL8546.Contig1_All	12 671 unnamed protein product [Vitis vinifera]	30282	MASLKTFEKCILKNPQSCSKPTTHTKQKLAVLPLPISRRSAILISVLPLSLVALPQTLVARERRNRKTIPLEDYLTSSDGLKYYDLVEGKGPVAEKGSTVQVHFDCIYRGITAVSSRESKLLAGNRIIAQPYEFQVGAIPGKERKREFVDNPNGLFSAQAAPKPPKAMYTITEGMKVGGKRTVIIPPEAGYGSKGMNEIPPGAEFELNIELLQAIPPEGK	83|120	21.4|13.2	1|1	5|3	5|3	4|2	4|2	0.743	1.314	4	3	-	-	0.574	0.739	4	3	*	*	1.265	1.194	4	3	-	-	0.64	0.773	4	3	-	-	CL8546.Contig1_All	83.78	9e-86	gi|462405284|gb|EMJ10748.1|	hypothetical protein PRUPE_ppa010825mg [Prunus persica]	72.82	1e-71	sp|Q9LM71|FKB18_ARATH	Peptidyl-prolyl cis-trans isomerase FKBP18, chloroplastic OS=Arabidopsis thaliana GN=FKBP18 PE=1 SV=2	78.53	2e-80	G7J5Z0	G7J5Z0_MEDTR Peptidyl-prolyl cis-trans isomerase OS=Medicago truncatula GN=MTR_3g115970 PE=4 SV=1	-
19	CL6774.Contig3_All	325 2397 RecName: Full=Sulfite reductase 1 [ferredoxin], chloroplastic; Short=NtSiR1; Flags: Precursor >gi|3721540|dbj|BAA33531.1| sulfite reductase [Nicotiana tabacum] >gi|3738234|dbj|BAA33796.1| sulfite reductase [Nicotiana tabacum]	94268	MTTSFGAASAATIAKDPKLQIPGSFYGLKSASNSLLLTKRPQVFRASSASSGPASFIRAVSTPVRPGTSVEQKRSKVEIFKEHSNFIRYPLNEELLTDAPNINEAATQLIKFHGSYQQYNRDERGAKSYSFMLRTKNPCGKVSNKLYLVMDDLADQFGIGTLRLTTRQTFQLHGVLKKDLKTVMSAIIKSMGSTLGACGDLNRNVLAPAAPFYRKDYLFAQKTAENIAALLTPQSGFYYDMWVDGEKVMSAEPPEVVKARNDNSHGTNFPDSPEPIYGTQFLPRKFKIAVTVPTDNSVDIFTNDIGVVVVTDADGEPQGFNIYVGGGMGRTHRLESTFARLAEPLGYVPKEDILYAVKAIVVTQRENGRRDDRKYSRMKYLISSWGIEKFKTVVEQYYG…	155|144	10.9|8.2	-|-	11|6	11|6	6|5	6|5	1.138	1.086	8	5	-	-	0.82	1.184	8	5	-	-	1.125	1.11	8	5	-	-	1.296	1.438	8	5	-	-	CL6774.Contig3_All	89.92	3e-50	gi|409190121|gb|AFV29920.1|	putative sulfite reductase-like protein, partial [Senecio aethnensis] >gi|409190123|gb|AFV29921.1| putative sulfite reductase-like protein, partial [Senecio aethnensis] >gi|409190125|gb|AFV29922.1| putative sulfite reductase-like protein, partial [Senecio aethnensis] >gi|409190127|gb|AFV29923.1| putative sulfite reductase-like protein, partial [Senecio aethnensis] >gi|409190129|gb|AFV29924.1| put…	84.42	0	sp|O82802|SIR1_TOBAC	Sulfite reductase 1 [ferredoxin], chloroplastic OS=Nicotiana tabacum GN=SIR1 PE=1 SV=1	88.41	0	B9HNX5	B9HNX5_POPTR Predicted protein (Fragment) OS=Populus trichocarpa GN=POPTRDRAFT_203102 PE=4 SV=1	alr1348
20	CL374.Contig4_All	281 2935 minus strand PREDICTED: transportin-1-like [Glycine max]	111762	TWKPQEEGLREICGLLEQQMAPTSDDKSMIWQRLQHYSQFPDFNNYLAFIFAHAEGISVEVRQAAGLLLKNNLRSAFKTMPPANQQYIKSELLPCMGAADRQIRSTAGTIISTFVQIGGVAGWPELLHALVKCLDSNDVNHMEGAMDALSKICEDVPQVLDSDISGLSERPINAFLPRFLQLFQSPHTILRKLSLGSVNQYIMLMPTVLYLSMDKYLQGLFLLANDPAPEVRKLVCAAFVQLIEVRSAVLEPHLRNVIEYMLVVNKDPDDEVALEACEFWSAYCEAELSPENLREFLPRLIPILLSNMAYADDDESIVEAEEDGSLPDRDQDLKPRFHSSRFHGSEDVEDEDDDIVNVWNLRKCSAAGLDFLSNVFGDDILPTLMPIVQAKLSATGDEA…	-|19	-|1.1	-|2	-|1	-|1	-|1	-|1	-	---	-	-	-	-	-	---	-	-	-	-	-	---	-	-	-	-	-	---	-	-	-	-	CL374.Contig4_All	86	0	gi|460370441|ref|XP_004231061.1|	PREDICTED: transportin-1-like [Solanum lycopersicum]	75.03	0	sp|B9FDR3|TNPO1_ORYSJ	Transportin-1 OS=Oryza sativa subsp. japonica GN=TRN1 PE=3 SV=2	83.63	0	D7U509	D7U509_VITVI Putative uncharacterized protein OS=Vitis vinifera GN=VIT_03s0038g02830 PE=4 SV=1	SPAC1B1.03c
21	CL8136.Contig3_All	149 529 programmed cell death, putative [Ricinus communis] >gi|223541153|gb|EEF42709.1| programmed cell death, putative [Ricinus communis]	17248	MADPELEAIRQRRMQELMAQRGMGSSQSSEQQKVQEEAKREVEEQRQMMLTQILTSEARARLARIALVKPDKARGVEDVILRAAQMGQIAGKVSEERLITLLEQINTQTTKETKVTIKRRQSVLDDE	23|-	6.3|-	1|-	1|-	1|-	1|-	1|-	---	-	-	-	-	-	---	-	-	-	-	-	---	-	-	-	-	-	---	-	-	-	-	-	CL8136.Contig3_All	82.68	5e-47	gi|224116734|ref|XP_002331864.1|	predicted protein [Populus trichocarpa] >gi|118487595|gb|ABK95623.1| unknown [Populus trichocarpa] >gi|222875382|gb|EEF12513.1| predicted protein [Populus trichocarpa]	55.56	4e-13	sp|Q54YS0|Y8111_DICDI	DNA-binding protein DDB_G0278111 OS=Dictyostelium discoideum GN=DDB_G0278111 PE=3 SV=2	82.68	7e-46	A9PGX0	A9PGX0_POPTR Predicted protein OS=Populus trichocarpa GN=POPTRDRAFT_746752 PE=2 SV=1	SPAC23C4.09c
22	CL12404.Contig3_All	602 2026 Aspartic proteinase Asp1 precursor, putative [Ricinus communis] >gi|223545882|gb|EEF47385.1| Aspartic proteinase Asp1 precursor, putative [Ricinus communis]	60005	RLLWVLLLLLMVELMCFVKGNVVFEAHHKYGGRGKGKALLGELRAHDSRRHGRMLGAVDFQLGGDGSPTNTALYYTIITIGTPPVDYHVQVDTGSDILWVNCKHCERCPTKSDLHISLNQYDLKASSTGKTITCDQDFCDTVFNSPNPNCKVGMNCEYSVTYGDGSRTEGYFVRDYFRLDQVTGNLQTSTMNGSIAFGCSAKQSGELGSSSEAVDGIIGFGQANTSILSQLALSGKVKKVFSHCLDGNKGGGIFAIGEVVQPKVNRTPLVPNEPHYNVNLKAVEVGGQFLNLPTDVFDTGSSRGTIIDSGTTLAYLPSEVYQQLVDKMMAQQPNLETHIVERQFRCFWYSGNIDDGFPVVNFHFEDSLLLPVFPHDYLFEVRDNEYCIGWQNSGMQTKD…	33|197	4.6|10.3	-|-	1|6	1|6	1|3	1|3	---	0.628	-	4	-	-	---	1.296	1	2	-	*	---	1.215	-	4	-	-	---	1.353	1	2	-	-	CL12404.Contig3_All	70.81	0	gi|460383317|ref|XP_004237374.1|	PREDICTED: aspartic proteinase-like protein 2-like [Solanum lycopersicum]	51.45	7e-139	sp|Q9S9K4|ASPL2_ARATH	Aspartic proteinase-like protein 2 OS=Arabidopsis thaliana GN=At1g65240 PE=1 SV=2	62.42	4e-55	I1NIJ1	I1NIJ1_SOYBN Uncharacterized protein OS=Glycine max PE=4 SV=1	-
23	CL4386.Contig3_All	221 1036 minus strand PREDICTED: uncharacterized protein LOC100250952 isoform 1 [Vitis vinifera] >gi|297738994|emb|CBI28239.3| unnamed protein product [Vitis vinifera]	35469	MSAIVCGKRSFFEDIESAASSPTSASPPAYKKFRCSSATSPVRFTYSPPVHPSPVDQLKVLFPDMEIQLLEKALEESGNDLNSAINSLNELRLGYAKCNSGLAAEENPNMEKGATLTGGDAVPLKEPQLQNKLPVDGAEWVDLVVKEMMNATSIDDARSRAARVLESLAKSISAQASAQAAEGFQKENVMLKEQIEALLRDNTILKRAVAIQHERQKEYDERNQEVLQLKQLLAQYQEQLRTLEVHNYALTLHLRQAQQSNSIPGHFHPDVF	16|-	2.9|-	-|-	1|-	1|-	1|-	1|-	---	-	-	-	-	-	---	-	-	-	-	-	---	-	-	-	-	-	---	-	-	-	-	-	CL4386.Contig3_All	83.33	2e-11	gi|296090488|emb|CBI40819.3|	unnamed protein product [Vitis vinifera]	-	-	-	-	63.81	4e-29	A2X1P9	A2X1P9_ORYSI Putative uncharacterized protein OS=Oryza sativa subsp. indica GN=OsI_06127 PE=4 SV=1	-
24	CL8386.Contig1_All	532 1965 minus strand beta-1,3-glucanase, acidic [Coffea arabica]	59023	MSRFCLFVFLLLFLGVFDEGFLVESLGVNWGTMATHKLPPKVVVQMLQDNGIKKVKLFDADQSTMSALAGTDIEVMVAIPNDQLAVMGNFDRAKQWVRRNVTRYNFNGGVNIKYVAVGNEPFLTSYNNSFLNTTFPALQNIQNALNEAGVGDSIKATVPLNADVYGSPESNPVPSAGRFRTDILDQMSQIVQFLNQNKAPFTVNIYPFLSLYANEHFPVDYAFFDGVSNPIVDNGIPYTNVFDANFDTLVSSLKALGFGDMPIIVGEVGWPTDGDRNANINYALRFYRGLLPRLAGNKGTPIRPGYIEVYLFGLIDEDIKSIAPGNFERHWGIFRYDGQPKFPMDLSGQQLDKYLVGAQNVNYLPTKWCMLRSDAKDLSKLADNINFACTFSDCTALGY…	151|121	4.8|7.1	-|-	2|3	2|3	1|2	1|2	0.006	---	2	-	-	-	---	---	-	-	-	-	12.242	---	2	-	-	-	---	---	-	-	-	-	CL8386.Contig1_All	84.95	0	gi|37223500|gb|AAQ90287.1|	beta-1,3-glucanase, acidic [Coffea arabica]	76.69	0	sp|Q6NKW9|E138_ARATH	Glucan endo-1,3-beta-glucosidase 8 OS=Arabidopsis thaliana GN=At1g64760 PE=1 SV=2	84.95	0	Q6TQD7	Q6TQD7_COFAR Beta-1,3-glucanase, acidic OS=Coffea arabica GN=bgl PE=2 SV=1	-
25	CL6795.Contig3_All	140 1099 minus strand phenylacetaldehyde reductase [Solanum lycopersicum] >gi|148888527|gb|ABR15769.1| phenylacetaldehyde reductase [Solanum lycopersicum]	43878	MATKTVCVTGGSGYIASWLIKDLLQRGYTVKASVRYPDDPKKTHHLLSLDGAKERLTLFKADLLEEGSFDAAIAGCEGVFHCASPFFLQTTNPQEELIDPAVKGTLNVLGSCAKTPSVKRVILTSSEAAIAFNHTPRTSEAVIDETWWADPDYCRENQLWYVLSKRLAEAAAWEFAKEKGIDLVSINPCCVIGPMLQPTLNTSCGSVLQLINGAETYPNSAYGWVHVKDVVDAHILAYEKPEANGRYYVVERCAHPLDLVKILRELYPTLKLPEKCADDKPLVPVYQVNTERAKKLGVVFTPLKQALKDTVESLKEKGFF	357|224	18.1|18.1	1|1	18|15	1|1	5|5	1|1	---	---	1	1	-	-	---	---	-	1	-	-	---	---	1	1	-	-	---	---	-	1	-	-	CL6795.Contig3_All	73.44	2e-129	gi|60265616|gb|AAX15955.1|	cinnamyl alcohol dehydrogenase 1 [Nicotiana tabacum]	50.47	2e-68	sp|Q9S9N9|CCR1_ARATH	Cinnamoyl-CoA reductase 1 OS=Arabidopsis thaliana GN=CCR1 PE=1 SV=1	73.44	2e-128	Q5D4P9	Q5D4P9_TOBAC Cinnamyl alcohol dehydrogenase 1 OS=Nicotiana tabacum GN=CAD1-1 PE=2 SV=1	mll1975
26	CL3158.Contig2_All	221 1567 hypothetical protein VITISV_004512 [Vitis vinifera]	60206	MGDAENNFQPSKKRAAGVQLSRDNPGLDDNEETCEQEAGSFKRASDEVLATRRIVKVRRQQTSSTPAAPAPSPASNPFAAIRLVPPASSAPPVELEANSGKSQETEQIDESKSENKVDKPKVESTAEEDKTDVNDDNAKQSESKVDDSKAQPDAQKDETDYVSKLNTAKSAVEEVTEGGNSGDGVKKDTEADNSETEVRKDVEDAGNDEEKENGEATAEKNAETASFSSFQQLSSSQNAFSGLTGTGFSSTSFSFGSIPKDGPPLGSSTDSLFGLKSDHPTFGFGVSNSENSSIFGTSGANIVNKSEGSKFPPMQEVPVETGEENEKAVFTADSVLFEFIDGVWKERGKGELKVNVSTTGTAKARLIMRARGNYRLILNASLFPDMKLTNMDKKGITFA…	-|148	-|7.8	-|2	-|6	-|6	-|2	-|2	-	1.204	-	6	-	-	-	0.775	-	3	-	-	-	1.562	-	5	-	-	-	0.979	-	2	-	-	CL3158.Contig2_All	76.62	3e-64	gi|297743302|emb|CBI36169.3|	unnamed protein product [Vitis vinifera]	39.58	2e-10	sp|Q86VV4|RNB3L_HUMAN	Ran-binding protein 3-like OS=Homo sapiens GN=RANBP3L PE=2 SV=2	71.43	4e-16	F4YFJ3	F4YFJ3_CAMSI Ran-binding protein (Fragment) OS=Camellia sinensis PE=2 SV=1	-
27	CL5731.Contig3_All	2 217 minus strand PREDICTED: fasciclin-like arabinogalactan protein 17-like [Glycine max]	9562	HLIPEYQTEESMYNAVRRFGKVKYDTLRLPHKVAAEEADGSVKFGHGEGSAYLFDPDIYTDGRISVQGIDGV	-|40	-|27.8	-|-	-|1	-|1	-|1	-|1	-	---	-	-	-	-	-	---	-	-	-	-	-	---	-	-	-	-	-	---	-	-	-	-	CL5731.Contig3_All	94.44	1e-34	gi|157273662|gb|ABV27485.1|	fasciclin-like arabinogalactan protein 14 [Gossypium hirsutum]	91.67	1e-34	sp|Q8RWC5|FLA16_ARATH	Fasciclin-like arabinogalactan protein 16 OS=Arabidopsis thaliana GN=FLA16 PE=2 SV=1	94.44	2e-33	A9XTL9	A9XTL9_GOSHI Fasciclin-like arabinogalactan protein 14 OS=Gossypium hirsutum GN=FLA14 PE=2 SV=1	-
28	Unigene30572_All	110 511 minus strand glycoprotein-like protein [Solanum tuberosum]	21767	MPFKRYVEIGRVALVNYGKDYGKLVVIVDVIDQNRALVDAPEMVRSQMNFKRLSLTDIKIDIKRVPKKKTLVAAMEAADVKGKWEKSSWGRKLIVQKRRASLNDFDRFKLMLAKIKRAGVVRQELAKLKKETAA	336|312	16.4|25.4	-|-	16|9	11|3	2|3	1|2	0.685	0.943	9	2	*	-	1.477	2.093	8	2	*	-	0.817	0.404	8	2	-	-	0.849	0.786	9	2	-	-	Unigene30572_All	94.03	5e-67	gi|76161008|gb|ABA40467.1|	glycoprotein-like protein [Solanum tuberosum]	85.82	2e-60	sp|Q9T043|RL142_ARATH	60S ribosomal protein L14-2 OS=Arabidopsis thaliana GN=RPL14B PE=2 SV=1	94.03	6e-66	Q3HVK7	Q3HVK7_SOLTU Glycoprotein-like protein OS=Solanum tuberosum PE=2 SV=1	SPAC1805.13
29	CL6002.Contig3_All	110 1192 minus strand DRT100 [Populus deltoides]	42978	LVSTVAVLLAVTLAVNACPPSDREALLAFKAALNEPYLGIFNTWSGADCCNSWYGVSCDQETKRVADIILRGESEDPIFEKAGRSGYMTGSISPSLCQLERLTTLVVADWKAISGEIPSCLASLPNLRILDLIGNKISGQIPTDIGKLSRLTVLNLADNQISGPLPSSIVNLNSLMHLELSNNKLSGQIPSEIGKLSMMSRALLSRNQLTGPIPSSLANIYRLADLDLSMNQITGSIPAQLGSMPVLSTLNLDSNLLSGDIPTSLLANTGLNILNLSRNSLEGNLPDVFGPKTYFTAIDLSYNNLKGSIPKSLSSAKYIGHLDLSHNHLCGPIPVGSPFDHLEASSFANNDCLCGMPLRTC	60|50	9.7|10.5	-|-	3|4	3|2	3|4	3|2	0.973	1.249	2	2	-	-	0.651	0.888	2	2	-	-	1.184	0.891	2	2	-	-	0.731	0.973	2	2	-	-	CL6002.Contig3_All	76.74	2e-150	gi|460367497|ref|XP_004229610.1|	PREDICTED: DNA-damage-repair/toleration protein DRT100-like [Solanum lycopersicum]	63.66	5e-122	sp|Q00874|DR100_ARATH	DNA-damage-repair/toleration protein DRT100 OS=Arabidopsis thaliana GN=DRT100 PE=2 SV=2	76.19	3e-142	F6HBA8	F6HBA8_VITVI DRT100-like protein OS=Vitis vinifera GN=VIT_13s0064g01260 PE=2 SV=1	alr0124_1
30	Unigene1609_All	192 569 PREDICTED: uncharacterized protein sll1770 [Vitis vinifera]	17710	MAVILASHSCYCSIGELINHGRPGKNLTFSVSLTNYNNSEFDNDVKNLVKTKKLCRFQVNMQQRELPAKLDRNGRVIKMVPTTEIRKRMTPSISTSEIVNGSAKNVNGVRVVNGGSLVKKDPAPPL	15|-	7.1|-	-|-	1|-	1|-	1|-	1|-	---	-	-	-	-	-	---	-	-	-	-	-	---	-	-	-	-	-	---	-	-	-	-	-	Unigene1609_All	50	1e-20	gi|225447514|ref|XP_002266310.1|	PREDICTED: uncharacterized protein sll1770 [Vitis vinifera]	-	-	-	-	50	2e-19	A5C497	A5C497_VITVI Putative uncharacterized protein OS=Vitis vinifera GN=VITISV_016570 PE=4 SV=1	-
31	CL6949.Contig2_All	105 962 minus strand PREDICTED: uncharacterized protein LOC100256940 [Vitis vinifera]	31516	MAFFKKAGNILGRTVSNHFSQEISSSKPSIFQAIRWMSSSKLFIGGLSYSTDDTSLIEAFNKYGEVAEARVIVDRETGRSRGFGFVTYSSIEEASAAIQALDQQELHGRRIRVDYANDRTRGYGGGGYSGGNFGGGGGGGSYNSGGYGGSYGTGGGYNNNDGYAGNYGGGGYDGSSNFNSGVNSYGSGTGSEGSSNYPTNNAGNLSYGGNSQTFSVAGGSDNFFSSGAGAGSSSASSGYDGFGDKFGSEQSSHEAGADEGVGQDESSGGSYRDDVDPHDNYADRRS	115|-	16.8|-	-|-	2|-	1|-	2|-	1|-	---	-	1	-	-	-	---	-	-	-	-	-	---	-	1	-	-	-	---	-	-	-	-	-	CL6949.Contig2_All	76.86	4e-42	gi|297733872|emb|CBI15119.3|	unnamed protein product [Vitis vinifera]	65.83	3e-37	sp|Q9FNR1|RBG3_ARATH	Glycine-rich RNA-binding protein 3, mitochondrial OS=Arabidopsis thaliana GN=RBG3 PE=2 SV=1	76.86	1e-40	A5B074	A5B074_VITVI Putative uncharacterized protein OS=Vitis vinifera GN=VITISV_038162 PE=4 SV=1	TP0356
32	CL12428.Contig2_All	108 2348 transketolase, putative [Ricinus communis] >gi|223548870|gb|EEF50359.1| transketolase, putative [Ricinus communis]	93963	MASSSSLTLSQAILSRSTIPRHGSAQQLHPAPTSSALSIPSFSGLKSASSSAAASVSRRRTPSITRLAVRASAAVETLEKTTDTELVEKSVNTIRFLAIDAVEKANSGHPGLPMGCAPMGHILYDEVMRYNPKNPYWFNRDRFVLSAGHGCMLQYALLHLAGYDAVKEEDLTQFRQWGSKTPGHPENFETPGVEVTTGPLGQGIANAVGLALVERHLAARYNKPDSEIVDHYTYVILGDGCQMEGISNEACSLAGHWGLGKLIAFYDDNHISIDGDTEIAFTESVDTRFEALGWHVIWVKNGNTGYDEIRAAIKEAKAVKDKPTLIKVTTTIGFGSPNKANSYSVHGSALGAKEVEATRKNLGWPYEPFHVPEDVKKHWSRHVPEGAALEAEWSAKFAE…	2107|1757	26.9|25.2	-|-	84|73	4|72	17|16	1|15	1.699	1.142	3	59	-	-	1.746	1.113	3	54	-	*	1.138	0.915	3	59	-	-	3.07	1.19	3	54	*	-	CL12428.Contig2_All	95.08	7e-24	gi|296084152|emb|CBI24540.3|	unnamed protein product [Vitis vinifera]	91.31	0	sp|Q42676|TKTC_CRAPL	Transketolase, chloroplastic (Fragment) OS=Craterostigma plantagineum GN=TKT3 PE=1 SV=1	93.57	0	F6HAM6	F6HAM6_VITVI Putative uncharacterized protein OS=Vitis vinifera GN=VIT_16s0022g01440 PE=4 SV=1	alr3344
33	CL6379.Contig2_All	107 1399 minus strand PREDICTED: acetylornithine deacetylase [Vitis vinifera]	55977	VTETLGDLNKDSFVTLLSKLISESKHLQNNPPDLIPEEDRIVRHVLDVLRPFSTANGGPLVINHITYKPNRGNLIVEYPGTQPGKIVSFVGMHMDVVTANPSDWDFDPFTLSIEGDKLRGRGTTDCLGHVALVTELMRRLGETKPQLKSTVVAVFIASEEDESIPGVGVDALKKDGWFDKLKPGPLYWIDSSDKQPSIGTGGMIEWKLQVYGKLFHSGLPNKAINPLELAMEALKVIQLQFYKDFPPHPNEEVYKFEIPSTMKPTQWSYPGGSINQIPAECTVCGDVRLTPFYSVTDLIKKLQEYVEDLNANIEKLDTRGPVSKYVLPDENLRGRMTITLDGATPGVACNLDSLGFHVLCKATEEVVGHVEPFSITGTLPLVRELQDEGFDVQISGYGL…	142|122	8.4|7.7	2|2	6|4	6|4	3|3	3|3	0.85	0.439	3	3	-	-	0.846	0.664	4	3	-	-	1.174	2.876	3	3	-	*	0.854	0.824	4	3	-	-	CL6379.Contig2_All	81.25	0	gi|460400740|ref|XP_004245890.1|	PREDICTED: acetylornithine deacetylase-like [Solanum lycopersicum]	51.72	2e-126	sp|P54638|ARGE_DICDI	Acetylornithine deacetylase OS=Dictyostelium discoideum GN=argE PE=1 SV=2	78.6	0	A5BNC5	A5BNC5_VITVI Putative uncharacterized protein OS=Vitis vinifera GN=VITISV_016426 PE=4 SV=1	RSc1641
34	Unigene33201_All	3 608 minus strand atpB gene product (chloroplast) [Boea hygrometrica] >gi|340549414|gb|AEK53236.1| ATP synthase CF1 beta subunit (chloroplast) [Boea hygrometrica]	24198	TTSGSGVSTLEKKNLGRIVQIIGPVLDVAFPPGKMPNIYNALVVKGRDTVGQPINVTCEVQQLLGNNRVRAVAMSATDGLMRGMEVIDTGAPLSVPVGGATLGRIFNVLGEPVDNLGPVDTRTTFPIHRSAPAFIQLDTKLSIFETGIKVVDLLAPYRRGGKIGLFGGAGVGKTVLIMELINNIAKAHGGVSVFGGVGERTR	6244|5021	66.3|65.8	-|-	179|131	170|125	10|10	9|9	0.985	1.165	136	105	-	-	1.166	1.178	104	102	*	*	0.951	0.931	126	105	-	-	1.009	1.248	108	102	-	*	Unigene33201_All	100	2e-107	gi|335059269|gb|AEH26909.1|	ATP synthase beta subunit [Schlegelia fuscata]	98.51	2e-110	sp|Q9MU41|ATPB_MAGTR	ATP synthase subunit beta, chloroplastic OS=Magnolia tripetala GN=atpB PE=3 SV=1	100	2e-110	Q9SC32	Q9SC32_PAUTO ATP synthase subunit beta (Fragment) OS=Paulownia tomentosa GN=atpB PE=3 SV=1	all5039
35	Unigene420_All	82 1620 unnamed protein product [Vitis vinifera]	70290	MLRRSILQLASCSSVGRVPLRTTTQIPSYLSSRRAYSVSQKNEPHKPDSGSSASEPQSHLPKILTGGLALGSVFLAAYYYGVLDNYLGKEQQSISEHPKARNDYINTHTSSGQRNAHHQASELSETIVGNSSQESDVSSSDADNAKQDIEPHSELSVPEDSIRTQEDKNFQAKDMPVLTPQNVDHVEGRDVPNVPQSSMSSDDVTSKPAEESFDVSRGVKPVEEQDKAIEITPTFTSADKTPADVEIKSVVRDQTTTQDMQGVKLGFCSKVKFILLYLQSLLSGQIIHSFLUSNFCUVVQGDGTQKPSSLLDDYYLRDNFEEHATSSSKKRKDISSTVEDVYDGYITKDGKLVLDFLQAIHAAEERQAELDARSFTEEKRAMKEKYEKELKDARVRELM…	115|-	5.7|-	5|-	4|-	4|-	2|-	2|-	0.791	-	4	-	-	-	1.012	-	4	-	-	-	1.232	-	4	-	-	-	0.937	-	4	-	-	-	Unigene420_All	77.27	1e-11	gi|115460838|ref|NP_001054019.1|	Os04g0636600 [Oryza sativa Japonica Group] >gi|32492176|emb|CAE04163.1| OSJNBb0034I13.6 [Oryza sativa Japonica Group] >gi|113565590|dbj|BAF15933.1| Os04g0636600 [Oryza sativa Japonica Group]	-	-	-	-	77.27	1e-10	Q7XND3	Q7XND3_ORYSJ OSJNBb0034I13.6 protein OS=Oryza sativa subsp. japonica GN=OSJNBb0034I13.6 PE=4 SV=1	-
36	CL8408.Contig2_All	271 1332 RecName: Full=Thiamine thiazole synthase 2, chloroplastic; AltName: Full=Thiazole biosynthetic enzyme 2; Flags: Precursor	44246	MAAMATTLISSLSKTQFFDKKSSFHGSPVFTRAVQPIKSAPQNLSITMSATAPYNLDNFKFQPIKESIVSREMTRRYMTDMITYADTDVVIVGAGCAGLSCAYELSKNPNINIAIIEQSVSPGGGSWLGGQLFSAMVVRKPAHKFLDELEIEYDEQDDYVVIKHAALFTSAIMSKVLARPNVKLFNAVAAEDLIVKGGRVAGVVTNWALVSMNHDTQSCMDPNVMEAKVVVSSCGHDGPFGATGVKRLKSIGMIDSVPGMKALDMNTAEDAIVRLTREIVPGMIVTGMEVAEIDGSPRMGPTFGAMMISGQKAAHLTLRALGQPNAFDGSYSEVKTAQPEFSLASAESDEIVDA	1242|1589	21.2|21.2	-|-	31|37	25|29	5|5	3|3	1.122	1.028	22	20	-	-	1.018	0.85	9	13	-	-	1.068	1.17	19	19	-	-	1.351	0.784	11	16	-	-	CL8408.Contig2_All	90.87	4e-114	gi|147770841|emb|CAN74175.1|	hypothetical protein VITISV_019223 [Vitis vinifera]	84.55	5e-176	sp|F6H7K5|THI42_VITVI	Thiamine thiazole synthase 2, chloroplastic OS=Vitis vinifera GN=THI1-2 PE=3 SV=1	90.87	5e-113	A5B514	A5B514_VITVI Putative uncharacterized protein OS=Vitis vinifera GN=VITISV_019223 PE=4 SV=1	SPBC26H8.01
37	CL2771.Contig1_All	105 428 minus strand putative 40S ribosomal protein S25-1 [Gardenia jasminoides] >CL2771.Contig3_All 127 450 minus strand putative 40S ribosomal protein S25-1 [Gardenia jasminoides]	18101	MAPKKDKAPPPSSKPAKSGGGKQKKKKWSKGKQKEKVNNMVLFDKATYDKLLIEAPKYKLITPSVLSDRLRISGSLARKAIRELMARGLIRMVSAHSSQQIYTRATNT	156|91	24.1|17.6	-|-	9|3	9|3	3|2	3|2	1.595	1.656	8	3	*	-	1.123	1.284	7	3	-	-	0.437	0.436	8	3	*	*	0.778	0.978	7	3	-	-	CL2771.Contig1_All	97.22	9e-34	gi|293337351|gb|ADE42971.1|	putative 40S ribosomal protein S25-1 [Gardenia jasminoides]	93.06	1e-32	sp|P46301|RS25_SOLLC	40S ribosomal protein S25 OS=Solanum lycopersicum GN=RPS25 PE=3 SV=1	97.22	1e-32	D5L5T4	D5L5T4_9GENT Putative 40S ribosomal protein S25-1 OS=Gardenia jasminoides PE=4 SV=1	SPBC3D6.15
38	CL13483.Contig1_All	168 1679 mitochondrial processing peptidase [Solanum tuberosum]	63072	MYRTAASRLRALKGRTGYRGLARYASTSAVAMKSSGGFFGWLTGEKSSSLSPLDFPLKDVILPEPLPDYVEPGKTKITTLPNGLRIASETSANPAASIGLYVDCGSIYETPASYGATHLLERMAFKSTTNRSHLRIVREVEAIGGNVTASVSREHMSYTYDALKTYVPQMVELLADCVRNPAFLDWEVSEQLHKLSAEISEYSKNPQHLLLEAIHSTGYSGPYANALVASESALGGLNSTVLEEFVAENYTAPRMVLAASGVDHDKLLEYAEPLLSDLPKVSRPSEPKPIYTGGDFRRQGDSGITHFALAFELPGGWVKEKDAIILTVLQMLMGGGGSFSAGGPGKGMYSRLYLRVLNEHPQIQSFSSFNSIYNHTGLFGIQATTGSDFAINAIDIAVK…	344|535	15.7|18.3	-|-	17|18	1|18	6|7	1|7	---	1.36	1	13	-	*	---	0.942	1	12	-	-	---	1.129	1	12	-	-	---	1.486	1	11	-	*	CL13483.Contig1_All	78.77	0	gi|587562|emb|CAA56520.1|	mitochondrial processing peptidase [Solanum tuberosum]	76.98	0	sp|P29677|MPPA_SOLTU	Mitochondrial-processing peptidase subunit alpha OS=Solanum tuberosum GN=MPP PE=1 SV=1	78.77	0	Q41440	Q41440_SOLTU Mitochondrial processing peptidase OS=Solanum tuberosum GN=MPP PE=2 SV=1	YHR024c
39	CL13112.Contig1_All	133 924 minus strand PREDICTED: protein SET [Vitis vinifera] >gi|297733991|emb|CBI15238.3| unnamed protein product [Vitis vinifera]	38303	MGADKGKKQKVGEVEEENNGTEHIDGELVLSIEKLQEIQDELEKINEEASEKVLEVEQKYNEIRKPVYDRRNDIIKSIPDFWLTAFMSHPALSELLTEEDQKIFKYLSNLEVEDCKDVKSGYSITFHFRPNPYFEDAKLTKTFTFLEEGTTKITATSIKWKEGMGIPNGVAEEKKGNKRSHIEESFFSWFNDTQHNGDLDEIQDEQVAEIIKDDLWPNPLTYFNNEADEEDFEMDDDDEDKDSDGSEDDDDDDEQDDEDDDEVE	48|47	3.8|3.8	1|1	2|1	2|1	1|1	1|1	---	---	1	1	-	-	---	---	-	1	-	-	---	---	-	1	-	-	---	---	1	1	-	-	CL13112.Contig1_All	83	2e-41	gi|388495026|gb|AFK35579.1|	unknown [Medicago truncatula]	44.39	9e-45	sp|Q9EQU5|SET_MOUSE	Protein SET OS=Mus musculus GN=Set PE=1 SV=1	81.37	2e-92	I1KCS5	I1KCS5_SOYBN Uncharacterized protein OS=Glycine max PE=4 SV=1	-
40	Unigene9452_All	113 565 putative ML domain protein [Nicotiana glauca]	19302	ITMVQMKVLGGLLLALCLLVPLSSAKSTDVHYCNKKANYPVKVSGLEINPYPISRGKNTTFEIAASTNEAISGGKLVIDVTYLIFHVYSEAHDLCVETSCPVSVGDFVVSHSQELPGITPPGSYTLKMTMVDANNRQLTCITFDFSIGFVA	152|168	8.6|8.6	-|-	5|5	5|5	1|1	1|1	1.117	0.698	5	5	-	-	0.782	1.532	2	3	*	*	1.269	0.999	4	5	-	-	1.233	1.112	3	3	-	-	Unigene9452_All	71.43	1e-48	gi|55294668|emb|CAH69231.1|	putative ML domain protein [Nicotiana glauca]	34.75	2e-14	sp|Q54SW1|Y2179_DICDI	Putative phosphatidylglycerol/phosphatidylinositol transfer protein DDB_G0282179 OS=Dictyostelium discoideum GN=DDB_G0282179 PE=3 SV=2	71.43	2e-47	Q5W1I1	Q5W1I1_NICGL Putative ML domain protein (Fragment) OS=Nicotiana glauca GN=ml PE=2 SV=1	-
41	Unigene9786_All	94 321 minus strand ribosomal protein S16 [Antirrhinum majus]	11587	QUAVYRIVAIDVRSRREGKDLRKVGFYDPMKNQTYLNVPVILYFLEKGAQPTGTVQNLLKKAEVFKELPSNQMKFN	74|92	17.1|17.1	-|-	1|2	1|2	1|1	1|1	---	0.644	1	2	-	-	---	1.074	1	2	-	-	---	1.052	1	2	-	-	---	0.716	1	2	-	*	Unigene9786_All	97.37	8e-37	gi|442742945|ref|YP_007353897.1|	ribosomal protein S16 (chloroplast) [Tectona grandis] >gi|438687586|emb|CCP47112.1| ribosomal protein S16 (chloroplast) [Tectona grandis] >gi|438688270|emb|CCP47201.1| ribosomal protein S16 (chloroplast) [Tectona grandis] >gi|438688394|emb|CCP47290.1| ribosomal protein S16 (chloroplast) [Tectona grandis]	90.28	1e-31	sp|Q3C1G1|RR16_NICSY	30S ribosomal protein S16, chloroplastic OS=Nicotiana sylvestris GN=rps16 PE=3 SV=1	97.1	9e-32	G9FCD0	G9FCD0_9LAMI 30S ribosomal protein S16, chloroplastic OS=Boea hygrometrica GN=rps16 PE=3 SV=1	ssr0482
42	CL2335.Contig2_All	94 981 PREDICTED: sex determination protein tasselseed-2-like isoform 1 [Glycine max]	37647	MLRAGFRKCCSLRVLLPPSSHRQFSAPTGSKLEGKVALITGAASGIGKETATKFINNGAKVVLADIQKDQGHETARELGPNATFIPCDVTKESDISQAVDFTISKHGQLDIMYNNAGVACQTPPSIVDLDLAAFDRVMAINVRSVVSGIKHGARVMIPRQRGVILCTASVTGLMGGLAQHTYSISKSSVIGIVKSAASELCQHGIRINCISPMAIPTPFAMEELKKYYPGVDPQRLVKMVHDFSVLKGAVCEPSDIANAAVFLASDDAKFVSGHNLVVDGGFTSIKSLNLPTPDQL	-|51	-|4.4	-|3	-|1	-|1	-|1	-|1	-	---	-	1	-	-	-	---	-	1	-	-	-	---	-	1	-	-	-	---	-	1	-	-	CL2335.Contig2_All	76.03	5e-111	gi|255559350|ref|XP_002520695.1|	short chain alcohol dehydrogenase, putative [Ricinus communis] >gi|223540080|gb|EEF41657.1| short chain alcohol dehydrogenase, putative [Ricinus communis]	45.59	8e-47	sp|Q7FAE1|MOMAS_ORYSJ	Momilactone A synthase OS=Oryza sativa subsp. japonica GN=Os04g0179200 PE=2 SV=1	76.03	5e-110	B9S3X6	B9S3X6_RICCO Short chain alcohol dehydrogenase, putative OS=Ricinus communis GN=RCOM_0556780 PE=3 SV=1	CC0094
43	CL9335.Contig1_All	284 760 minus strand unknown [Populus trichocarpa]	21144	MAAAASTSMAATAFLMHRLPATRPAAIFGPLPQRPSLSSTPFKLLKESRRSSQLLVKASSSDESPLDANELFTDLKEKWDAVENKSTVLLYGGGAIVAVWLASIVVGAINSVPLLPKIMELVGLGYTGWFVYRYLLFKSSRKELASDIEAIKKKIAGTE	109|65	6.3|6.3	1|1	4|2	4|2	1|1	1|1	0.883	0.953	3	2	-	-	1.099	1.242	3	2	-	-	1.209	0.988	3	2	-	-	1.039	1.151	3	2	-	-	CL9335.Contig1_All	90.24	2e-37	gi|357512475|ref|XP_003626526.1|	hypothetical protein MTR_7g116860 [Medicago truncatula] >gi|355501541|gb|AES82744.1| hypothetical protein MTR_7g116860 [Medicago truncatula]	66.01	2e-46	sp|O04616|Y4115_ARATH	Uncharacterized protein At4g01150, chloroplastic OS=Arabidopsis thaliana GN=At4g01150 PE=1 SV=1	90.24	2e-36	G7L3Z4	G7L3Z4_MEDTR Putative uncharacterized protein OS=Medicago truncatula GN=MTR_7g116860 PE=4 SV=1	-
44	CL4143.Contig2_All	67 7941 minus strand unnamed protein product [Vitis vinifera]	334217	ESLTAIAPSVSTPSTTRRIQIFRHKILSILNSSDSLQMTSEFVSVLVDLLFQTLSIYDDRGSRKAVDDVIVKALSEAVFMKSFAATLVQAMERHSKFQSLTGGYRLLKWSCLLLIYSQFALLSKNALCRVAQAQASVLHIVMQGSFRVRRACKKTLFHLFTKSPDIYKTYLEELKDGRIPYKDSPELIYMMLDYLNSNPASFDKWKNIFLDIYVKAVLNAREKPTKGLSEAFSPLFTRLSHEDFKNSILPSSGKMLKRNPELVLESVGVLLKSTNLDLSKYAIEILSVVLTQARHADEGRRLAALAIVRCLSQKSSSPDAVEAMFSAVKSVMGGSEGRLTFPYQRVGMINALREVSDAPEGKYFSSLSPTVCGFLLSCYKDDGNEEVKLAILYCLAAWA…	-|48	-|1.0	-|-	-|2	-|2	-|2	-|2	-	0.973	-	2	-	-	-	2.117	-	2	-	-	-	---	-	1	-	-	-	---	-	1	-	-	CL4143.Contig2_All	87.23	2e-127	gi|224145873|ref|XP_002325795.1|	predicted protein [Populus trichocarpa] >gi|222862670|gb|EEF00177.1| predicted protein [Populus trichocarpa]	39.71	0	sp|Q10105|GCN1_SCHPO	Translational activator gcn1 OS=Schizosaccharomyces pombe (strain 972 / ATCC 24843) GN=gcn1 PE=3 SV=1	83.8	0	F6HI21	F6HI21_VITVI Putative uncharacterized protein OS=Vitis vinifera GN=VIT_04s0043g00570 PE=4 SV=1	-
45	CL5626.Contig1_All	414 1769 PREDICTED: uncharacterized protein At5g03900, chloroplastic-like [Vitis vinifera]	59852	SAIRPGGSVESDKLPSDVRKRAMDAIDSSGRRVTIGDVASKAGLKLNEAQKALQALAADTSGFLEVSDEGDVLYVFPKDYRSKLAAKSFGMKIDPLLEKGKMAAEYLVRVSFGTALIASIVLVYTTIIAIASSSRESDNRGRRGRSYDTGFTFYLSPTDLFWYWDPYYYRRRRVREGDGGMNFIESVFSFVFGDGDPNQGIEEERWKLIGQYIASNGGVVTAEELAPYLDLETTEKMDDDSYILPVLLRFDGQPEVDEEGNILYRFPSLQRTAAPQRSGRKEYVGRRWADWVGEVEKFFKEKKWQFSKTSASERAMVIGLGGLNLFGVIILGTMLKNMTVSPSGFISFVSDIFPLLQIYAGSFFAIPLVRWFFIQNKNAKIVKRNQAREQRARALESPD…	-|30	-|2.9	-|-	-|1	-|1	-|1	-|1	-	---	-	-	-	-	-	---	-	-	-	-	-	---	-	-	-	-	-	---	-	-	-	-	CL5626.Contig1_All	85.19	0	gi|297740116|emb|CBI30298.3|	unnamed protein product [Vitis vinifera]	74.89	0	sp|Q8GW20|Y5390_ARATH	Uncharacterized protein At5g03900, chloroplastic OS=Arabidopsis thaliana GN=At5g03900 PE=1 SV=2	85.02	0	F6HKL2	F6HKL2_VITVI Putative uncharacterized protein OS=Vitis vinifera GN=VIT_08s0007g03300 PE=4 SV=1	-
46	Unigene29478_All	238 1251 minus strand PREDICTED: auxin-induced protein PCNT115 isoform 1 [Vitis vinifera]	44906	VPRMKLGSQGLEVSAQGLGCMGMSAFYGPPKPDAEMIELIHHAISSGVTHLDTSDLYGPYTNEILLGKALKGGMREKAELATKFGIKLDGWDMEIIGDPSFVRSSCEASLKRLDVDCIDLYYQHRIDTRLPIEVTVGELKKLVEEGKIKYVGLSEASASTIRRAHAVHPITAVQLEWSLWAREAEEEIIPTCRELGIGIVAYSPLGRGFFSGGAELIKDLTKDDYRKVLPRFQPENLEHNKNLFERVKDMATRKGCTPSQLSLAWVHHQGNDVCPIPGTTKIANLNQNIGALAVKLTPEDMAELEYIASAGAVKGDLNRPDYLTWKNSNTPPLSTWKS	585|642	27.8|24.3	-|-	22|23	21|7	7|6	6|1	0.674	0.557	16	7	*	*	0.751	0.926	15	5	-	-	1.778	1.827	17	7	-	*	0.833	0.818	16	5	-	*	Unigene29478_All	82.38	1e-91	gi|357502827|ref|XP_003621702.1|	Aldo/keto reductase [Medicago truncatula] >gi|355496717|gb|AES77920.1| Aldo/keto reductase [Medicago truncatula]	79.59	6e-140	sp|P40691|A115_TOBAC	Auxin-induced protein PCNT115 OS=Nicotiana tabacum PE=2 SV=1	82.38	1e-90	G7KTV6	G7KTV6_MEDTR Aldo/keto reductase OS=Medicago truncatula GN=MTR_7g021850 PE=4 SV=1	AGc447
47	Unigene34212_All	94 1740 pectin methyl esterase [Solanum tuberosum]	70755	MASTHQPLLDTPHKTTAHCKILFFTISIFAIVISAVLLLPNLTERSSHNHLSNPSYMCHGALNPEACQEFVSEVVSDGVTPTDGTTVLQKFLIKQAHHMNGAILQTRKLKNQMNEQNEQGALTDCLELIDLSIDLVFDSIKALGKQTTTSHANAQAWLSGVLTNHVTCFDGLNSFGRNSIGAILEDLISRARASLAMLAAVSEHDKEMIQSLRGNLPSWITPMDRKLLQSTANAIKADLVVAKDGSGNYKTVAEAIAAAPNKSKERYVIYVKKGTYKENVEVGKNKRNLMIVGDGMNSTIITGDLNVVDGSTTFRSATLAAVGQGFILQDICIQNTAGPEKHQAVALRVGADQSVINRCRIDAYQDTLYTHSLRQFYRDSYITGTVDFIFGNAAVVFQK…	-|24	-|2.2	-|-	-|1	-|1	-|1	-|1	-	---	-	-	-	-	-	---	-	-	-	-	-	---	-	-	-	-	-	---	-	-	-	-	Unigene34212_All	81.35	2e-156	gi|118485585|gb|ABK94644.1|	unknown [Populus trichocarpa]	64.8	0	sp|P14280|PME1_SOLLC	Pectinesterase 1 OS=Solanum lycopersicum GN=PME1.9 PE=1 SV=5	81.35	2e-155	A9PE41	A9PE41_POPTR Pectinesterase OS=Populus trichocarpa PE=2 SV=1	CAC3373
48	CL9513.Contig1_All	277 1134 chloroplast pigment-binding protein CP29 [Nicotiana tabacum]	36052	MAAAATTASSFIGTRLPDVHSGSGRVHARFGFGTKKSPPKKTSSKIVSDRPLWFPGAKAPEYLDGSLVGDYGFDPFGLGKPVEYLQYDLDSLDQNLAKNLAGDIIGTRTESSDVKSTPFQPYSEVFGLQRFRECELIHGRWAMLATLGALTVEWLTGVTWQDAGKVELVEGSSYLGQPLPFSITTLIWIEALVIGYIEFQRNAELDPEKRLYPGGSYFDPLGLAADPEKKATLQLAEIKHARLAMVAFLGFAVQAAATGKGPLNNWATHLSDPLHTTILDTFGFFS	881|465	23.4|20.6	1|2	48|24	1|24	6|5	1|5	---	1.121	-	21	-	-	---	1.273	-	20	-	*	---	1.199	-	21	-	-	---	1.54	-	20	-	*	CL9513.Contig1_All	97.26	4e-34	gi|3153151|emb|CAA06961.1|	chlorophyll a/b-binding protein [Hordeum vulgare subsp. vulgare]	85.35	2e-131	sp|Q9XF88|CB4B_ARATH	Chlorophyll a-b binding protein CP29.2, chloroplastic OS=Arabidopsis thaliana GN=LHCB4.2 PE=1 SV=1	97.26	4e-33	O65817	O65817_HORVU Chlorophyll a/b-binding protein (Fragment) OS=Hordeum vulgare GN=CP29 PE=2 SV=1	-
49	CL12364.Contig1_All	89 1798 minus strand PREDICTED: asparaginyl-tRNA synthetase, cytoplasmic 1-like [Vitis vinifera]	78371	MSLDTAPPALDGLTLSDAVEEAQFSQRVLIQSILGRSDKGAGLAGQKVRIGGWVKTGREADKGRFAFLEVNDGSCPGNLQVIVKAELYKLSDVVPTGTCVHVEGLLKSPPEGVKQRIELEVERVIDVGTVDAAKYPLPKTKLTLEFLRDVVHLRPRTNTISAIARIRNALAYATHTFFQKHGFLYVHTPIITTSDCEGAGEMFQVTTIINDAEKLEKELKENPAPSETDIKAAELAVKEKGEAVAQLKSAKASKKEIVAAVAELNKAKENLSKLDERYKLAERFRLSGGIPKKDGKIDYAEDFFARQAFLTVSGQLQVETYACALSSVYTFGPTFRAENSHTSRHLAEFWMVEPEIAFADIQDDMNCAEAYVRFLCQWLLDHCYDDMEFMTKFIDKTAI…	-|51	-|5.6	-|-	-|3	-|3	-|3	-|3	-	1.012	-	3	-	-	-	0.671	-	3	-	-	-	0.772	-	3	-	-	-	0.904	-	3	-	-	CL12364.Contig1_All	85.59	3e-54	gi|20269119|emb|CAC81816.1|	putative asparaginyl-tRNA synthetase [Solanum lycopersicum]	73.61	0	sp|Q9SSK1|SYNC3_ARATH	Asparagine--tRNA ligase, cytoplasmic 3 OS=Arabidopsis thaliana GN=SYNC3 PE=3 SV=1	77.12	0	F6HGX0	F6HGX0_VITVI Putative uncharacterized protein OS=Vitis vinifera GN=VIT_11s0016g02680 PE=3 SV=1	ZasnS
50	CL2879.Contig1_All	831 1709 PREDICTED: uncharacterized protein LOC100246624 [Vitis vinifera] >CL2879.Contig2_All 749 1627 PREDICTED: uncharacterized protein LOC100246624 [Vitis vinifera]	37358	LAIQRLEIAKNDLRHRIAKEARGNAILQASLERRKQALHERRLALEQDVARLQEQLQAERDLRAALEVGLSMSSGQFSGSRGMDSKTRAELEEIALAEADVARLKQKVAELHHQLNQQRQHHYGSLSDACDRYQHAANQSSHQKYFQQDFDTTLAVCNNERKQRTEELLGLDLRNIKGQLLTSGGNSRLPSRKQLVESASLSDSKSTEASTSLSLDDLCAVDSASLPSTSRAAEVMDYPRHPSAASSTLVELTTRLDFFKERRSQLMEQLHNLDLNYGSTPQDFVYKPSSPPW	-|22	-|5.1	-|5	-|1	-|1	-|1	-|1	-	---	-	-	-	-	-	---	-	-	-	-	-	---	-	-	-	-	-	---	-	-	-	-	CL2879.Contig1_All	85.71	1e-43	gi|79328146|ref|NP_001031905.1|	Rho GTPase activation protein [Arabidopsis thaliana] >gi|332005315|gb|AED92698.1| Rho GTPase activation protein [Arabidopsis thaliana]	-	-	-	-	85.8	6e-52	I1M750	I1M750_SOYBN Uncharacterized protein OS=Glycine max PE=4 SV=1	-
51	CL76.Contig10_All	289 2802 minus strand PREDICTED: uncharacterized protein LOC100252015 [Vitis vinifera]	103243	SVCSFALMEAPPAAPTGVRNGGFAMPPISSSSSQLSRKEWRLVSEQSARNSGHEELERSKLVQSDERLIYEVQHGREPVDVDFCSITIDGGLDNDILQQRLHAVAKEREELQHMEIELRAQVIARSEIVGMQNTFDTQIKEHANANLKLQEQLHEKEQKIHELERKMEEKERELHAIRLDNEAQAWAKEDLLREQSKELQSYRRERDNSEAERVQHIKQIHDLQEHIQEKDRLLMELQEQHRIAQETILFKDEQLREAQAWITRAQEIDALQSTTNHTLQAELRERTEHYNQLWLGCQRQFGEMERLHLHIQQLQLELTDVREKSGSNLDDSHISQTNLNDASELGQSNGSQLEANGIGSPSANAGSLQNGNSESASGGNTSTQADHVHVVAFAPQSLL…	43|-	3.0|-	8|-	2|-	2|-	2|-	2|-	---	-	1	-	-	-	---	-	-	-	-	-	---	-	1	-	-	-	---	-	-	-	-	-	CL76.Contig10_All	72.29	2e-16	gi|224138318|ref|XP_002322784.1|	predicted protein [Populus trichocarpa] >gi|222867414|gb|EEF04545.1| predicted protein [Populus trichocarpa]	-	-	-	-	84.62	2e-10	F6HXS5	F6HXS5_VITVI Putative uncharacterized protein OS=Vitis vinifera GN=VIT_09s0002g08910 PE=4 SV=1	-
52	CL5533.Contig13_All	451 1740 minus strand heat shock protein binding protein, putative [Ricinus communis] >gi|223551053|gb|EEF52539.1| heat shock protein binding protein, putative [Ricinus communis]	58428	MEVFMKGENLLPEYAPQGFSHNSPKTPFRNSGDLDFNDVFGGPPRRFSMQEAGARYSFGETVESEEDGVSSPWGALKEKPVFGEESVARRRHQGDDFFDDIFRGDESYSSPRRTDRDRDNLFGSSPGSRIMSPARPLPPKTEPFCTSLPAQFSLPAKLTQVVEFPTFATGNRSQYKMDGSTNGLSSQHSSSGSLSRFSNEATRGQDEIRNEAHPVYRQSPLSHEASFSCEDSPYTVSSDQKDNARNLKKETKSVDSNDNQFHFSIYKWAGRGVPMIMPLVGRNNLKSKDISRFDRCASSNGRMESKPSTMTGEGMPPNIKPETLKTECEKKNPRSKEETKELQYSIEEALYGIPDSKSRNNAKDTVVSGRATQRMKAERVISPDESGIREKAEKEVPMK…	28|-	1.9|-	-|-	1|-	1|-	1|-	1|-	---	-	-	-	-	-	---	-	-	-	-	-	---	-	-	-	-	-	---	-	-	-	-	-	CL5533.Contig13_All	51.96	3e-11	gi|147861963|emb|CAN80902.1|	hypothetical protein VITISV_025418 [Vitis vinifera]	-	-	-	-	51.96	3e-10	A5B8L6	A5B8L6_VITVI Putative uncharacterized protein OS=Vitis vinifera GN=VITISV_025418 PE=4 SV=1	-
53	CL2514.Contig1_All	75 938 minus strand harpin binding protein 1 [Solanum lycopersicum] >gi|38679319|gb|AAR26481.1| harpin binding protein 1 [Solanum lycopersicum]	37195	MASVLTTLPLSHHQSVPSFSPTSPSNAPSTSVSITSDFSRTQNIHPSSAFHLKRNSKLKKGLICQSYSSEVTFIEPPESKESKDELIGSLKLKLLSAVSGLNRGLAANEDDLRKAEAAAKELESAGGLVDLSADLDKLQGRWKLIYSSAFSSRTLGGSRPGPPPIGRLLPITLGQVFQRIDVFSKDFDNIVELELGAPWPLPPVEVTATLAHKFELIGNCKIKITFEKTTVKTTGNLSQLPPLDVPRLPDSLRPPSDTRSGEFEVTYLDSDTRITRGDRGELRVFVIS	266|214	19.4|15.3	-|-	10|8	3|8	4|3	1|3	0.645	0.981	3	8	-	-	---	1.157	1	6	-	-	0.853	0.88	3	8	-	-	---	1.869	1	6	-	-	CL2514.Contig1_All	83.25	1e-71	gi|255627497|gb|ACU14093.1|	unknown [Glycine max]	74.07	2e-64	sp|Q9LW57|PAP6_ARATH	Probable plastid-lipid-associated protein 6, chloroplastic OS=Arabidopsis thaliana GN=PAP6 PE=1 SV=1	83.25	1e-70	C6SXX0	C6SXX0_SOYBN Putative uncharacterized protein OS=Glycine max PE=2 SV=1	-
54	CL13248.Contig2_All	298 855 minus strand RecName: Full=V-type proton ATPase catalytic subunit A isoform 2; Short=V-ATPase subunit A 2; AltName: Full=V-ATPase 69 kDa subunit 2; AltName: Full=Vacuolar proton pump subunit alpha 2 >gi|1303679|dbj|BAA09098.1| adenosine	23801	KESEYGYVRKVSGPVVVADGMAGAAMYELVRVGHDNLIGEIIRLEGDSATIQVYEETAGLMVNDPVLRTHKPLSVELGPGILGNIFDGIQRPLKTIAIKSGDVYIPRGVSVPALDKDILWEFQPKKIGEGDLLTGGDLYATVFENSLMQHHVALPPEAMGKITYIAPAGQYSLKDTVLELEFQGVK	226|245	52.2|43.0	-|-	7|7	7|1	6|5	6|1	0.554	---	5	-	*	-	1.199	---	4	-	-	-	0.643	---	5	-	-	-	0.549	---	4	-	-	-	CL13248.Contig2_All	100	7e-06	gi|458367|gb|AAA16498.1|	vacuolar H+-ATPase 69-kDa catalytic subunit [Gossypium hirsutum] >gi|458369|gb|AAA16499.1| vacuolar H+-ATPase 69-kDa catalytic subunit [Gossypium hirsutum]	96.77	6e-94	sp|P31405|VATA_GOSHI	V-type proton ATPase catalytic subunit A OS=Gossypium hirsutum GN=CVA69.24 PE=2 SV=1	96.77	3e-92	D7SS06	D7SS06_VITVI Putative uncharacterized protein OS=Vitis vinifera GN=VIT_09s0054g00890 PE=3 SV=1	YDL185w_1
55	Unigene19769_All	368 1456 minus strand PREDICTED: uncharacterized protein At2g17340 [Vitis vinifera] >gi|297744464|emb|CBI37726.3| unnamed protein product [Vitis vinifera]	47817	MESSGEMVLLPVLVESNYRACTIPYRFPSDNPKKPTPAELSWINLFSNSIPSFRKRAESDDTAPDAPAKADKFAQRYAEILEDLKKDPESHGGPPDCILLCQLREQVLREVGFRDIFKKVKDEENAKAISLFEDVVRLNDAIQDEVERVGNLLRGIFAGNIFDLGSAQLAELFAKDGISFQASCQNLVPRPWVIDDLDNFISKWGRRSWKKAVIFVDNSGADIILGILPFTRELLRHGVQVVLAANDLPSINDVTYPELIEIIAKLKDENGKLLGVDTSNLLIANSGNDLPVIDLTRVSQELAYLASDADLVVLEGMGRGIETNLYAQFKCDSLKIAMVKHQEVAQFLGGRLYDCVIKYNEFL	23|19	2.5|2.5	-|-	2|1	2|1	1|1	1|1	---	---	-	-	-	-	---	---	-	-	-	-	---	---	-	-	-	-	---	---	-	-	-	-	Unigene19769_All	91.01	9e-92	gi|409893151|gb|AFV46213.1|	hypothetical protein, partial [Scutellaria baicalensis]	80.77	2e-165	sp|Q949P3|Y2734_ARATH	Uncharacterized protein At2g17340 OS=Arabidopsis thaliana GN=At2g17340 PE=1 SV=1	85.25	5e-177	D7U4Q7	D7U4Q7_VITVI Putative uncharacterized protein OS=Vitis vinifera GN=VIT_03s0038g04010 PE=4 SV=1	MJ0202
56	Unigene28112_All	158 1219 minus strand leucine-rich repeat protein [Nicotiana tabacum]	42907	ILLSLTSVSNACPPSDRAALLAFRAALKEPYLGIFNSWKGYDCCHNWYGVSCDPETHRVADINLRGESEDPIFQKAHRTGYMTGSISPAICQLERLSSLTMADWKGISGPIPPCIASLPFLRILDLIGNQITGEIPADIGRLSRLTVLNVADNQLSGTIPRSLTNLSSLMHLDIRGNKISGTLPRNFGKLRMLSRALLSKNKLNGLIPNSISYIYRLSDLDLSLNQLSGPIPASLGKMPVLATLNLDGNQMSGPIPPTLISSAISILNLSRNAFEGYIPDAFGARSYFMVLDLSYNKLRGRIPKSISSATFIGHLDVSHNHLCGPIPAGSPFDHLEASSFVYNDCLCGKPLRAC	486|605	28.0|31.1	1|-	14|21	14|3	7|8	7|2	1.023	---	10	-	-	-	0.815	---	7	-	-	-	1.115	---	10	-	-	-	1.458	---	7	-	-	-	Unigene28112_All	81.36	3e-150	gi|88604736|gb|ABD46739.1|	leucine-rich repeat protein [Nicotiana tabacum]	62.28	2e-112	sp|Q00874|DR100_ARATH	DNA-damage-repair/toleration protein DRT100 OS=Arabidopsis thaliana GN=DRT100 PE=2 SV=2	81.36	3e-149	D2CFI9	D2CFI9_TOBAC Leucine-rich repeat protein OS=Nicotiana tabacum GN=LRR1 PE=2 SV=1	alr0124_1
57	CL3761.Contig1_All	244 1266 minus strand TGB12K interacting protein 2 [Nicotiana tabacum]	43865	PPVTTDGEKSDAAGSKTPAESASAETPSGQRRATPPSVAGMPNPFDFSAMTGLLNDPSIKELAEQIAKDPSFNQMAEQLQKTFQGAAVEDGIPNFDTQQYYSTMQQVMQNPQFMTMAERLGNTLMQDPAMSGMLESLTNPVNKDQLEERMSRVKEDPSLKPILEEIENGGPAAMMRYWNDKEVLQKLGEAMGFAVGESTTSAGDAAGEDETEEVNDEESIVHHTASVGDVEGLKKALADGADKDEEDSEGRTALHFACGYGEDKCAQVLLEAGAKVDALDKNKNTPLHYAAGYGRKDCVELLLKNGAAVTLQNLDGKTPIDVAKLNNQNEVLTLLEKDAFL	248|224	12.0|12.0	1|1	8|6	5|5	2|2	1|1	0.722	0.888	3	4	-	-	0.99	0.641	4	2	-	-	2.12	1.567	3	4	-	-	1.048	0.851	4	2	-	-	CL3761.Contig1_All	88.52	8e-24	gi|168001000|ref|XP_001753203.1|	predicted protein [Physcomitrella patens subsp. patens] >gi|162695489|gb|EDQ81832.1| predicted protein [Physcomitrella patens subsp. patens]	69.23	2e-115	sp|Q9SAR5|AKR2_ARATH	Ankyrin repeat domain-containing protein 2 OS=Arabidopsis thaliana GN=AKR2 PE=1 SV=2	88.52	8e-23	A9RGG8	A9RGG8_PHYPA Predicted protein OS=Physcomitrella patens subsp. patens GN=PHYPADRAFT_113963 PE=4 SV=1	all2748
58	CL3660.Contig13_All	109 1110 PREDICTED: uncharacterized protein LOC100249628 [Vitis vinifera]	48574	VLLMTIQNAPPGLDYDRDKRFSKSFKEMVAMCLVKDQTKRPTAEKLLKHSFFKNAKPPELSVKKLFADMPPLWKRVKDLQLKDAAQLALKKMPSAEQEAISQSEYQRGVSAWNFDVEDLKFQASLLQEEDEIQEIKEEEDSIKLYMNHKVALRSVVKPAATDNNIGREKLNGNEVPVVESQTKKGKTTESYLIESDNQGNSGLKKSGSKADLPPPMVEKDAAQAKTRIQTGRACQTQSGPLMPGIVLSHSLSERARNLERYEIGNQQVRRAPSFSGPLNLPNRASANSLSAPIKSSGGFKDSLEDKSKTNLVQIKGRFSVTSENVDLVKDIPLC	14|-	2.7|-	-|-	1|-	1|-	1|-	1|-	---	-	-	-	-	-	---	-	-	-	-	-	---	-	-	-	-	-	---	-	-	-	-	-	CL3660.Contig13_All	89.11	3e-39	gi|27476091|gb|AAO17022.1|	Putative Ste20-related protein kinase [Oryza sativa Japonica Group]	50.67	1e-15	sp|Q551H4|FRAY2_DICDI	Serine/threonine-protein kinase fray2 OS=Dictyostelium discoideum GN=fray2 PE=3 SV=1	89.11	3e-38	Q8GZX1	Q8GZX1_ORYSJ Putative Ste20-related protein kinase OS=Oryza sativa subsp. japonica GN=OSJNBa0090O10.12 PE=4 SV=1	-
59	CL9537.Contig3_All	184 942 minus strand PREDICTED: peptidyl-prolyl cis-trans isomerase CYP20-2, chloroplastic-like [Vitis vinifera] >gi|296088703|emb|CBI38153.3| unnamed protein product [Vitis vinifera]	32754	MAVAYASLSNISSISAPRSVSPTKTTKPVCSFASVKLRKSAFSSFSSLNSFSGSFRLDCPIRSRTGSMPFSVRAMAEEATLQSKVTNKVYLDISIGNPVGKLAGRIVIGLYGDDVPQTAENFRALCTGEKGFGYKGSSFHRVIKDFMIQGGDFDKGNGTGGKSIYGRTFKDENFKLVHTGPGVVSMANAGPNTNGSQFFICTVKTPWLDQRHVVFGQVLEGMDIVRLIESQETDRGDRPTKRVVISDCGELPV	1181|944	25.3|26.5	-|-	40|30	3|4	5|6	1|1	0.884	0.693	2	4	-	-	---	0.843	1	4	-	-	0.59	0.793	2	4	-	-	---	0.659	1	4	-	-	CL9537.Contig3_All	93.06	5e-84	gi|133741925|gb|ABO37960.1|	peptidylprolyl isomerase [Triticum aestivum]	81.25	4e-14	sp|P82536|TLP20_SPIOL	Peptidyl-prolyl cis-trans isomerase TLP20, chloroplastic (Fragments) OS=Spinacia oleracea PE=1 SV=2	93.06	5e-83	A7XDG5	A7XDG5_WHEAT Peptidyl-prolyl cis-trans isomerase OS=Triticum aestivum PE=3 SV=1	YDR155c
60	Unigene11848_All	235 1506 minus strand PREDICTED: uncharacterized protein LOC100248339 [Vitis vinifera]	53357	TDGPVLNLINKRLRALRKKLNRITQMEESQSQGKILNKEQEETLRSKSFVLAGIDELDKLRQPLSHAVDQEIELALEKNKQKPDILTTEIPDDDDAVEPEAKAGNDDVSSVSDLLNLLYFGSVFDVKTLMRAHDNMLTRTHERNCCLTYDYVTDDDAAGDPLKEWDLDLIAMLGGLLISRPVNSSLSHKNALQKCVEHAKLWLANAEQPIEPNSNITYAGLREKLNKIMASDYFTTTPEIKAPVEVAAAAGNYTSFQVPVHGSMIPPVSVSAPMEGSAAEYQQEEEQSPDSHDNEIYGDETGPVEEFHQGGSEVENVTEAQAQTELGLPDAEVDQNLRDADLKEQHAARRSYQNYRGGRGGGGRRGYSNGRGGRGSSRGGYQNGRSQFYDQHGGYYPRN…	32|26	4.0|2.8	-|-	1|1	1|1	1|1	1|1	---	---	1	-	-	-	---	---	-	-	-	-	---	---	1	-	-	-	---	---	-	-	-	-	Unigene11848_All	71.43	4e-20	gi|356551464|ref|XP_003544095.1|	PREDICTED: uncharacterized protein LOC100807412 [Glycine max]	-	-	-	-	68.49	9e-06	D7L574	D7L574_ARALL Putative uncharacterized protein OS=Arabidopsis lyrata subsp. lyrata GN=ARALYDRAFT_479980 PE=4 SV=1	-
61	CL11320.Contig2_All	167 2395 minus strand RecName: Full=NADH dehydrogenase [ubiquinone] iron-sulfur protein 1, mitochondrial; AltName: Full=76 kDa mitochondrial complex I subunit; AltName: Full=Complex I-76kD; Short=CI-76kD; AltName: Full=NADH-ubiquinone oxidoreduc	94314	MGLGQLASRALIRSTRLTTSKPSHLLRRTIVSTPDLHNAEAAAAAAQPETDLPKRNPVAGARVHFPNPDDAIEVFVDGYPVKIPKGMTVLQACEIAGVDIPRFCYHSRLSIAGNCRMCLVEVEKSPKPVASCAMPALPGMKIKTDTPLAKKAREGVLEFLLMNHPLDCPICDQGGECDLQDQSMAFGSDRGRFTETKRSVVDKNLGPLVKMVMTRCIQCTRCVRFATEVAGVQDLGMLGRGSGEEIGTYVERLMTSELSGNVIDICPVGALTSKPFAFKARNWELKGTETIDVTDAVGSNIRIDSRGPEVMRILPRLNEDINEEWISDKTRFFYDGLKRQRLNDPMIRGADGRFKAVSWRDALAVVAEVIHQVKPEEIVGVAGKLSDAESMMALKDFLN…	-|126	-|8.6	-|-	-|7	-|7	-|5	-|5	-	0.667	-	5	-	-	-	1.139	-	5	-	-	-	0.917	-	4	-	-	-	1.012	-	6	-	-	CL11320.Contig2_All	95.18	3e-39	gi|224160309|ref|XP_002338191.1|	predicted protein [Populus trichocarpa] >gi|222871196|gb|EEF08327.1| predicted protein [Populus trichocarpa]	86.85	0	sp|Q43644|NDUS1_SOLTU	NADH dehydrogenase [ubiquinone] iron-sulfur protein 1, mitochondrial OS=Solanum tuberosum PE=2 SV=1	86.5	0	B9T118	B9T118_RICCO NADH-ubiquinone oxidoreductase, putative OS=Ricinus communis GN=RCOM_0458390 PE=4 SV=1	mll1362
62	CL7905.Contig1_All	302 907 PREDICTED: 39S ribosomal protein L45, mitochondrial-like [Vitis vinifera]	31198	GSLKVSMTSPGFVYEPYSPREPIYFWYRWFTRSGWKRTKEDIILELKSAYAIVKLRKSGYSKKKFYEEAVDLYKEINTQMANGDKGLLRKSVTENMYSALKNEIKHRETVWSHVYWELMMPIVKIRTLRARLIGVDRNDLNKVFVQLSLEFLSKQKFEAYNSSGAVVAGDKKKEVLVRDIWVFEKSLFHQGAYWRLCGRIKV	24|-	5.4|-	-|-	1|-	1|-	1|-	1|-	---	-	-	-	-	-	---	-	-	-	-	-	---	-	-	-	-	-	---	-	-	-	-	-	CL7905.Contig1_All	81.82	8e-94	gi|449485732|ref|XP_004157259.1|	PREDICTED: probable 39S ribosomal protein L45, mitochondrial-like [Cucumis sativus]	27.27	3e-09	sp|Q9VCX3|RM45_DROME	Probable 39S ribosomal protein L45, mitochondrial OS=Drosophila melanogaster GN=mRpL45 PE=2 SV=1	76.58	2e-67	C6TGL0	C6TGL0_SOYBN Putative uncharacterized protein OS=Glycine max PE=2 SV=1	-
63	CL532.Contig2_All	185 1276 minus strand PREDICTED: SAL1 phosphatase [Vitis vinifera] >CL532.Contig3_All 206 1297 PREDICTED: SAL1 phosphatase [Vitis vinifera]	46813	TTPHLRAVRRRAAASMSYDKQLAAAKKAASLAARLCQKVQKALLRSDVQSKSDKSPVTVADYGSQVLVSFILEKELPSLPFSLVAEEDSGDLRKEESRETLHRITELVNETLASDGMNDTSPLSEEDVLIAIDNGKSEGGPRGQHWVLDPIDGTKGFLRGDQYAIALALLDEGKVVLGVLACPNLPLASIARCDQSFSEDKVGCLFFAQVDAGTYMQSLDGSLPTKVHVSAIENPEEASFFESFEAAHSLHDLSSLIARKLGVKAPPVRIDSQAKYGALSRGDGAIYLRFPHRGYREKIWDHAAGYIVVAEAGGVVTDAAGNPLDFSKGRYLDLDTGIIVTNQKLMPSLLKAVQESIKEKASSL	39|162	5.2|9.3	-|-	1|5	1|5	1|2	1|2	---	2.78	1	5	-	*	---	1.716	-	3	-	-	---	0.634	1	3	-	-	---	---	-	1	-	-	CL532.Contig2_All	83.14	3e-153	gi|460387948|ref|XP_004239634.1|	PREDICTED: SAL1 phosphatase-like [Solanum lycopersicum]	77.9	2e-138	sp|Q42546|DPNP1_ARATH	SAL1 phosphatase OS=Arabidopsis thaliana GN=SAL1 PE=1 SV=1	82.26	2e-139	F6I0D4	F6I0D4_VITVI Putative uncharacterized protein OS=Vitis vinifera GN=VIT_04s0044g01480 PE=4 SV=1	SPCC1753.04
64	CL3042.Contig2_All	216 929 minus strand predicted protein [Populus trichocarpa] >gi|222862349|gb|EEE99855.1| predicted protein [Populus trichocarpa] >CL3042.Contig6_All 125 838 minus strand predicted protein [Populus trichocarpa] >gi|222862349|gb|EEE99855.1| p	32407	AATASVAAAASVTNNPRKSSTYLPLCHRHCLYRSHSNKVSFRLSTKPKLRFSSKGLQSGWNCSTVVAVDGSSKTAAATTIKSEGSLAKAKDVKLSNEPLPAALGSEESISEFISQVSSLVKLVDSKDIMELQLKQLDCELLIRKKEALSPPPAPVTYVQTQPQPAVLPPVPTPSPVPNGAPSPAPTLAPAPPKAQPSKSSHPPFKCPMAGTFYRSPAPGEPPFVKVGDKVKKGQVLCI	-|19	-|3.4	-|3	-|1	-|1	-|1	-|1	-	---	-	-	-	-	-	---	-	-	-	-	-	---	-	-	-	-	-	---	-	-	-	-	CL3042.Contig2_All	75.61	4e-10	gi|388513081|gb|AFK44602.1|	unknown [Lotus japonicus]	53.42	1e-17	sp|Q9LLC1|BCCP2_ARATH	Biotin carboxyl carrier protein of acetyl-CoA carboxylase 2, chloroplastic OS=Arabidopsis thaliana GN=BCCP2 PE=1 SV=1	75	3e-11	E6Y6R2	E6Y6R2_ARAHY Biotin carboxyl carrier protein 2-4 OS=Arachis hypogaea GN=BCCP2-4 PE=2 SV=1	all5057
65	CL7763.Contig1_All	62 724 minus strand PREDICTED: 60S ribosomal protein L10 isoform 2 [Vitis vinifera] >gi|225425354|ref|XP_002275270.1| PREDICTED: 60S ribosomal protein L10 isoform 1 [Vitis vinifera] >Unigene27418_All 102 764 minus strand PREDICTED: 60S ribos	32532	MGRRPARCYRQIKNKPYPKSRYCRGVPDSKIRIYDVGMKKKGVDEFPFCVHLVSWEKENVSSEALEAARIACNKYMTKFAGKDAFHLRVRVHPFHVLRINKMLSCAGADRLQTGMRGAFGKPQGTCARVAIGQVLLSVRCKDGNSHHAQEALRRAKFKFPGRQKIIVSRKWGFTKYCRTDYVKWKSENRIVPDGVNAKLLGCHGPLAQRQAGRAFLSGAVQ	180|163	10.4|10.4	2|2	8|6	8|6	2|2	2|2	2.539	3.731	6	6	*	*	2.497	1.353	5	6	*	*	0.619	0.593	6	5	-	*	4.146	2.174	5	5	*	-	CL7763.Contig1_All	100	5e-06	gi|194700722|gb|ACF84445.1|	unknown [Zea mays]	93.15	1e-118	sp|P93847|RL10_SOLME	60S ribosomal protein L10 OS=Solanum melongena GN=RPL10 PE=2 SV=1	95.02	7e-121	F6HJ95	F6HJ95_VITVI Putative uncharacterized protein OS=Vitis vinifera GN=VIT_01s0150g00580 PE=4 SV=1	SPAP7G5.05
66	CL6959.Contig1_All	129 1040 minus strand salt tolerance protein 5-like protein [Solanum tuberosum]	48525	MAILSEYEEEEDQKKPTSSASSARKPFNAALDPSDPLGFLEKVFEFVAKESDLFKSDYLVKDVNAVVRMVKDKVEAEEKKRKEVKIEGSGKAEKKIKEEVAPPSVKKEEVKKEEVVKEEKESGSKVEEEKNGRRAPNKGNGLDMDNYSWGQSLQEVNITVPVPPGTKSRFISCEIKKNHLKVGLKGQPPVIDGELFQPVKVDDCFWSLEDQKSISILLTKQNQMEWWKYLVKGEPEVDTQKVEPENSKLSDLDPETRSTVEKMMFDQRQKQMGLPTSDEMQKQEILKKFMAEHPEMDFSRAKIN	27|97	2.3|7.2	1|1	2|2	2|2	1|2	1|2	---	---	1	1	-	-	---	---	1	1	-	-	---	---	1	1	-	-	---	---	1	1	-	-	CL6959.Contig1_All	84.12	5e-83	gi|115467244|ref|NP_001057221.1|	Os06g0231300 [Oryza sativa Japonica Group] >gi|113595261|dbj|BAF19135.1| Os06g0231300 [Oryza sativa Japonica Group]	59.65	5e-56	sp|Q9Y266|NUDC_HUMAN	Nuclear migration protein nudC OS=Homo sapiens GN=NUDC PE=1 SV=1	84.12	6e-82	A2YAZ4	A2YAZ4_ORYSI Putative uncharacterized protein OS=Oryza sativa subsp. indica GN=OsI_22266 PE=4 SV=1	-
67	CL5646.Contig1_All	97 573 minus strand eukaryotic translation initiation factor 5A [Arachis hypogaea] >CL5646.Contig3_All 174 650 minus strand eukaryotic translation initiation factor 5A [Arachis hypogaea]	22513	MSDEEHHFESKADAGASKTYPQQAGTIRKNGYIVIKGRPCKVVEVSTSKTGKHGHAKCHFVGIDIFTSKKLEDIVPSSHNCDVPHVNRTDYQLIDISEDGFVSLLTENGNTKDDLRLPTDENLLTQIKDGFAEGKDLVVSVMSAMGEEQICALKDIGPK	150|99	7.5|7.5	1|1	9|5	9|5	1|1	1|1	0.503	0.431	6	3	*	*	0.908	0.532	5	3	-	-	0.71	1.143	6	3	-	-	0.348	0.216	5	3	*	*	CL5646.Contig1_All	98.11	2e-88	gi|403084315|gb|AFR23349.1|	eukaryotic translation initiation factor 5A [Arachis hypogaea]	96.86	5e-87	sp|P24922|IF5A2_NICPL	Eukaryotic translation initiation factor 5A-2 OS=Nicotiana plumbaginifolia GN=EIF-5A2 PE=2 SV=1	97.48	1e-86	A1Z3W7	A1Z3W7_ROSCH eIF5A OS=Rosa chinensis PE=2 SV=1	YJR047c
68	CL7201.Contig1_All	631 900 minus strand PREDICTED: uncharacterized protein SYNPCC7002_A1590 [Vitis vinifera] >gi|296085939|emb|CBI31380.3| unnamed protein product [Vitis vinifera]	11443	ASMENKISCDSRRDDSPVQKLTSDAVIEVSIEIPFAFRAIPAQAIESTGSQVLEQILKAMLPRFMSQLVKDYQAWASGDTSRQPLGTGEI	-|96	-|22.2	-|1	-|2	-|2	-|1	-|1	-	0.58	-	2	-	-	-	1.215	-	2	-	-	-	1.773	-	2	-	-	-	1.229	-	2	-	*	CL7201.Contig1_All	82.22	5e-37	gi|460388111|ref|XP_004239713.1|	PREDICTED: uncharacterized protein SYNPCC7002_A1590-like [Solanum lycopersicum]	-	-	-	-	79.12	4e-33	G7I7C8	G7I7C8_MEDTR (RAP Annotation release2) Galactose-binding like domain containing protein OS=Medicago truncatula GN=MTR_1g050530 PE=4 SV=1	-
69	CL12053.Contig1_All	217 714 PREDICTED: glutaredoxin-C5, chloroplastic-like [Vitis vinifera]	22057	SISLSPRSSSLRTQIPSVFRAPNRFSTYYTSSNVLRCRTTSRNVRLLKIRAMCSDSSGSQLEESVKKTIGENPVVVYSKTWCSYSSEVKSLFKRLGVEPLVIELDQLGPQGPQLQKTLETLTGQHTVPNVFIGGKHIGGCTDTVKLHQKGELESLLSEAGATKSES	220|224	15.7|40.4	-|-	9|7	9|7	2|4	2|4	0.389	0.571	6	7	*	-	0.814	1.054	2	6	-	-	0.988	0.789	6	7	-	-	0.535	0.45	2	4	-	*	CL12053.Contig1_All	83.19	3e-42	gi|297744259|emb|CBI37229.3|	unnamed protein product [Vitis vinifera]	77.78	2e-36	sp|Q0J3L4|GRS10_ORYSJ	Monothiol glutaredoxin-S10 OS=Oryza sativa subsp. japonica GN=GRXS10 PE=2 SV=2	84.16	1e-37	G3MQU3	G3MQU3_9ACAR Putative uncharacterized protein OS=Amblyomma maculatum PE=2 SV=1	YDR513w
70	CL6444.Contig1_All	132 617 minus strand fimbriata-associated protein [Antirrhinum majus]	22748	SKKIILRSSDGEVFEVEEAVAVESQTIKHMIEDECADNVIPLPNVTGKILSKVIEYCKRHVEAAASASAAKADDKLASAATDDDLKAFDADFVKVDQATLFDLILAANYLNIKTLLDLTCQTVADMIKGKTPEEIRTTFNIKNDFTPEEEDEVRRENQWAFE	35|-	4.9|-	2|-	1|-	1|-	1|-	1|-	---	-	1	-	-	-	---	-	1	-	-	-	---	-	1	-	-	-	---	-	1	-	-	-	CL6444.Contig1_All	93.33	8e-29	gi|91940186|gb|ABE66403.1|	fimbriata-associated protein [Striga asiatica]	75.93	2e-51	sp|Q39255|SKP1A_ARATH	SKP1-like protein 1A OS=Arabidopsis thaliana GN=SKP1A PE=1 SV=1	90	4e-48	Q1EMN6	Q1EMN6_PLAMJ Fimbriata-associated protein (Fragment) OS=Plantago major GN=fap2 PE=2 SV=1	SPBC409.05
71	Unigene27539_All	142 1566 minus strand PREDICTED: aspartic proteinase nepenthesin-1-like [Glycine max]	54874	CLIFSLILITSSSSSHDQHFQVLDVSASLQQTRLVFSPNLAQVSPATIQQLLHFKNSSADSLSLTLHPRSSLPLDYYNDNYTSLTLSRLARDEARVQSLLSRHSRALSRHSRSDFKPVRLPEQLQSPVISGIRQGSGEYFARIGVGRPAKEFYMVIDSGSDVSWLQCNPCSDCYQQSDPIYNPSASSTYKPLTCNSQQCTSLEVSACRIDSCLYQVSYGDGSYTVGNFATETISFGSSGSVPNVALGCGHDNEGLFSGAAGLLGLGGGSLSLPSQIKATSFSYCLVNRDSSSSSTLEFNSAQPADSVLAPLLRNSFISTYHFVGFTGISVGGRPVQIPQYLFEIGRDGRGGVIVDSGTAVTRFRTEVYNLVRDAFASMTQNLPSAGGFSLFDTCYDLSS…	83|70	7.4|4.6	-|-	5|3	5|3	3|2	3|2	---	---	1	1	-	-	1.466	---	2	1	-	-	---	---	1	1	-	-	0.987	---	2	1	-	-	Unigene27539_All	67.7	3e-132	gi|224126221|ref|XP_002329620.1|	predicted protein [Populus trichocarpa] >gi|222870359|gb|EEF07490.1| predicted protein [Populus trichocarpa]	57.82	2e-137	sp|Q9LS40|ASPG1_ARATH	Protein ASPARTIC PROTEASE IN GUARD CELL 1 OS=Arabidopsis thaliana GN=ASPG1 PE=1 SV=1	67.7	4e-131	B9N2X4	B9N2X4_POPTR Predicted protein (Fragment) OS=Populus trichocarpa GN=POPTRDRAFT_264878 PE=3 SV=1	-
72	CL12828.Contig2_All	225 1226 minus strand PREDICTED: probable membrane-associated 30 kDa protein, chloroplastic [Vitis vinifera] >gi|297735245|emb|CBI17607.3| unnamed protein product [Vitis vinifera]	46478	MAVRAPMTGISMASSTVTPSAPSCNRGVIIVKAQPFRPSFFGHGVGTPKYTGIRLSYSSRSRCNSHGGGALGTQMNLFDRFARVVKSYANALISSFEDPEKILEQAVMEMNDDLIKMRQATAQVLASQKQLENKYKAAQQASEDWYRRAQLALGKGEEDLAREALKRRKSYADNANSLKAQLDQQKSVVENLVSNTRLLESKIQEAKSKKDTLKARAQSAKTASKVSEMLGNVNTSSALSAFEKMEEKVLAMESQSEALNQLTSDELEGKFALLETSSVDDDLANLKKQLSGSTKKGELPPGRTPVTSASSALKFQDPEIEKELNELRQKAKEY	30|-	3.3|-	-|-	2|-	2|-	1|-	1|-	---	-	1	-	-	-	---	-	1	-	-	-	---	-	1	-	-	-	---	-	1	-	-	-	CL12828.Contig2_All	88.78	1e-40	gi|147795803|emb|CAN69783.1|	hypothetical protein VITISV_012616 [Vitis vinifera]	74.29	8e-126	sp|Q03943|IM30_PEA	Membrane-associated 30 kDa protein, chloroplastic OS=Pisum sativum GN=IM30 PE=2 SV=1	88.78	1e-39	A5B7C6	A5B7C6_VITVI Putative uncharacterized protein OS=Vitis vinifera GN=VITISV_012616 PE=4 SV=1	all2342
73	CL1714.Contig6_All	149 1753 minus strand PREDICTED: T-complex protein 1 subunit zeta [Vitis vinifera] >gi|296087296|emb|CBI33670.3| unnamed protein product [Vitis vinifera] >CL1714.Contig7_All 248 1852 minus strand PREDICTED: T-complex protein 1 subunit zeta [	71124	MSLKVLNPNAEVLNKSHALHMNINAAKGLQDVLKSNLGPKGTIKMLVGGAGDIKLTKDGNTLLKEMQIKSPTAIMIARTAVAQDDTSGDGTTSTVIFIGELMKQSERYIDEGMHPRVLVDGFEIAKRATLQFLEKFKTPVVMGDEPDKEILKMVARTALRTKLYEALADQLTDIVVNAVLCIRKPEEPIDLFMVEIMHMRHKFDVDTRLVEGLVLDHGSRHPDMKRRAENCYILTSNVSLEYEKSEINAGFFYSSAEQREAMVAAERLSVDKRVQKIIDLKNEVCAGNDNNFVVINQKGIDPPSLDLLARAGIIALRRAKRRNMERLVLACGGEAVNSVDDLTPDCLGWAGLVYEHVLGEEKYTFVENVKNPHSCTILIKGPNDHTIAQIKDAVRDGLR…	92|296	9.3|11.0	-|-	5|8	5|8	4|4	4|4	0.583	0.676	3	6	*	-	1.283	1.423	2	5	-	-	0.713	1.109	3	6	*	-	0.54	1.168	2	5	-	-	CL1714.Contig6_All	94.95	0	gi|225451999|ref|XP_002283510.1|	PREDICTED: T-complex protein 1 subunit zeta [Vitis vinifera] >gi|296087296|emb|CBI33670.3| unnamed protein product [Vitis vinifera]	69.31	1e-29	sp|Q29236|TCPZ_PIG	T-complex protein 1 subunit zeta (Fragment) OS=Sus scrofa GN=CCT6 PE=3 SV=1	94.95	0	D7TT48	D7TT48_VITVI Putative uncharacterized protein OS=Vitis vinifera GN=VIT_14s0006g03200 PE=3 SV=1	YDR188w
74	CL1077.Contig2_All	213 1961 minus strand predicted protein [Populus trichocarpa] >gi|222864909|gb|EEF02040.1| predicted protein [Populus trichocarpa]	75270	MVMFKVARVETTPFDGQKPGTSGLRKKVKVFKQPHYLQNFVQSTFNALGADKVRGATLVVSGDGRYFSKDAIQIIIKMASANGVRHIWVGQNGLLSTPAVSAVIRERIGPDGSKANGAFILTASHNPGGPHEDFGIKYNMENGGPAPEGITDKIYSNTTTIEEYLIAEGLPDVDISTIGITSFAGPEGQFDVDVFDSASDYVKLMKSIFDFQSIQKLLSSPKFTFCYDALHGVAGAYAKRIFVEELGAQESSLLNCVPKEDFGGGHPDPNLTYAKELVARMGLGKTNTEQEPPEFGAAADGDADRNMILGKRFFVTPSDSVAIIAANAVQAIPYFSGGLKGVARSMPTSAALDVVAKNLNLKFFEVPTGWKFFGNLMDAGMCSICGEESFGTGSDHIRE…	195|263	11.5|15.6	-|-	12|15	10|14	6|8	5|7	1.234	1.286	8	11	-	-	0.923	0.756	7	11	-	-	0.905	0.923	8	11	-	-	0.817	0.733	7	10	-	*	CL1077.Contig2_All	89.54	0	gi|12585330|sp|Q9ZSQ4.1|PGMC_POPTN	RecName: Full=Phosphoglucomutase, cytoplasmic; Short=PGM; AltName: Full=Glucose phosphomutase >gi|4234941|gb|AAD13031.1| cytosolic phosphoglucomutase [Populus tremula x Populus tremuloides]	89.54	0	sp|Q9ZSQ4|PGMC_POPTN	Phosphoglucomutase, cytoplasmic OS=Populus tremula GN=PGM1 PE=2 SV=1	89.37	0	Q6S3D6	Q6S3D6_POPTO Cytosolic phosphoglucomutase OS=Populus tomentosa PE=2 SV=1	AGl1564
75	CL3306.Contig4_All	103 1176 10-hydroxygeraniol oxidoreductase [Camptotheca acuminata]	48354	MVKAPEEEHPVKAFGWAARDNSGILSPFHFSRRATREKDVKLKILYCGVCHSDLHSVKNETGRVTYPVLPGHEIAGVVTEVGSKVTKVKVGDKVGVGCMAGSCRSCESCANDLENYCSKMILTYRSKYFDGTPTYGGYSDIMVCDEHFIIRWPDNMPLDAGCPLLCAGITTYSPLKYFGLDKPGTHLGVVGLGGLGHVAVKFAKAFGAKVTVISTAPNKKEEAIKNLGVDSFLVSRDQDQMLAAAGTMDGILDTVSAHHPVQPLLNLLKPSGKLIILGVIPKPLELPVFPLLSGRKTVAGSGIGGMKETQEMMDFAAKHNIIADVEVIPMGYVNQAMERLEKADVKYRFVIDIAGTLK	158|179	13.7|11.7	-|-	8|5	6|5	4|3	3|3	0.522	0.442	4	4	*	*	3.645	0.982	3	4	-	-	1.25	0.861	2	3	-	-	---	0.512	1	3	-	-	CL3306.Contig4_All	77.37	4e-133	gi|462401056|gb|EMJ06613.1|	hypothetical protein PRUPE_ppa007622mg [Prunus persica]	75.21	3e-130	sp|Q9ZRF1|MTDH_FRAAN	Probable mannitol dehydrogenase OS=Fragaria ananassa GN=CAD PE=2 SV=1	76.4	3e-132	B9IIG5	B9IIG5_POPTR Cinnamyl alcohol dehydrogenase-like protein OS=Populus trichocarpa GN=CADL4 PE=3 SV=1	SMc00680
76	Unigene27480_All	275 1264 chloroplast lipocalin [Solanum tuberosum]	43879	CSNLVAAQSPPVILQSHYPRLPRGMPSKDMSNCCLEHPISIKFGVKQAISGLAASLILLSQTNLATATHLSHGNICQLASATDNKLSLPLDNNEGNGMLMMMRGMTVKNFDPARYAGRWFEVASLKRGFAGQGQEDCHCTQGIYTFDLDTPAIQVDTFCVHGGPAGYITGIRGKVQCLSEEDKDKNETDLERQEMIKEKCYLRFPTLPFIPKEPYDVIATDYDNYALVSGAKDRSFIQIYSRTPNPGPEFIGKYKSYLATFGYDPSKIKDTPQDCEVMSNSQLAAMMSMSGMQQALTNQFPNLELKASVEFNPFTSVFDTLKKLVELYFK	93|105	15.5|15.5	-|-	9|7	9|7	5|5	5|5	0.57	0.326	5	4	-	*	0.921	0.732	5	5	-	-	1.335	1.619	5	4	-	-	0.783	0.491	5	5	-	*	Unigene27480_All	82.35	6e-54	gi|414585342|tpg|DAA35913.1|	TPA: hypothetical protein ZEAMMB73_878935 [Zea mays] >gi|414585343|tpg|DAA35914.1| TPA: hypothetical protein ZEAMMB73_878935 [Zea mays]	30.4	2e-06	sp|Q8SPI0|APOD_MACFA	Apolipoprotein D OS=Macaca fascicularis GN=APOD PE=2 SV=1	77.01	2e-107	I1PQ37	I1PQ37_ORYGL Uncharacterized protein OS=Oryza glaberrima PE=4 SV=1	-
77	CL678.Contig1_All	2305 3273 PREDICTED: pyruvate dehydrogenase E1 component subunit beta [Vitis vinifera]	40044	HELLLFEALREGLEEEMERDPRVCVMGEDVGHYGGSYKVTKGLATKYGDLRVLDTPIAENSFTGMAIGAAMTGLRPIVEGMNMGFLLLAFNQISNNCGMLHYTSGGQFKIPIVIRGPGGVGRQLGAEHSQRLESYFQSIPGIQMVACSTPYNAKGLMKAAIRSENPVILFEHVLLYNLKERIPDEEYVLNLEEAEMVRPGEHVTILTYSRMRYHVMQAAKTLVNKGYDPEVIDIRSLKPFDLYTIGNSVKKTHRVLIVEECMRTGGIGASLTASINENFHDYLDAPIVCLSSQDVPTPYAGTLEEWTVVQPAQIVAAVEQLCQ	69|44	3.1|3.1	2|2	4|1	4|1	1|1	1|1	2.275	---	3	1	-	-	1.091	---	2	1	-	-	0.539	---	3	1	-	-	1.277	---	2	1	-	-	CL678.Contig1_All	97.05	7e-168	gi|225430650|ref|XP_002269441.1|	PREDICTED: pyruvate dehydrogenase E1 component subunit beta [Vitis vinifera]	94.1	1e-165	sp|O64688|ODPB3_ARATH	Pyruvate dehydrogenase E1 component subunit beta-3, chloroplastic OS=Arabidopsis thaliana GN=E1-BETA-2 PE=1 SV=1	97.05	8e-167	F6HI27	F6HI27_VITVI Putative uncharacterized protein OS=Vitis vinifera GN=VIT_04s0043g00720 PE=4 SV=1	all0122
78	CL3186.Contig1_All	128 667 minus strand ADP-ribosylation factor [Medicago truncatula] >gi|355514554|gb|AES96177.1| ADP-ribosylation factor [Medicago truncatula] >CL3186.Contig6_All 126 665 minus strand ADP-ribosylation factor [Medicago truncatula] >gi|35551455	24317	MGLTFTKLFSRLFAKKEMRILMVGLDAAGKTTILYKLKLGEIVTTIPTIGFNVETVEYKNISFTVWDVGGQDKIRPLWRHYFQNTQGLIFVVDSNDRDRVVEARDELHRMLNEDELRDAVLLVFANKQDLPNAMNAAEITDKLGLHSLRQRHWYIQSTCATSGEGLYEGLDWLSNNIANK	266|257	23.9|32.2	6|6	19|14	5|2	4|5	1|1	0.994	0.915	2	2	-	-	0.868	0.868	2	2	-	-	1.413	1.224	2	2	-	-	1.189	0.958	2	2	-	-	CL3186.Contig1_All	100	2e-95	gi|356526797|ref|XP_003532003.1|	PREDICTED: LOW QUALITY PROTEIN: ADP-ribosylation factor-like [Glycine max]	99.44	7e-103	sp|P51823|ARF2_ORYSJ	ADP-ribosylation factor 2 OS=Oryza sativa subsp. japonica GN=ARF PE=2 SV=2	100	1e-102	G7K096	G7K096_MEDTR ADP-ribosylation factor OS=Medicago truncatula GN=MTR_5g034130 PE=4 SV=1	YDL137w
79	CL221.Contig10_All	70 2877 minus strand PREDICTED: pre-mRNA-splicing factor SYF1-like [Glycine max]	129284	MSVSQDLYPSEDDYLYEEEVLRNPNSLKLWWRYLIARSEAPFKKRAIIYERALKALPGSYKLWHAYLRERLEIVRNLPITHSQYQALNNTFERALTTMHKMPRIWIMYLQSLTQQKLITKTRRTFDRALCALPVTQHDRIWEYYLIFVSQKGVPIETSLRVYRRYLKYDPSHIEDFVEFLINSELWQESAERLAGILNDDQFYSIKGKTKHRLWLELCDLLTQHASEISGLNVDAIIRGGIRKFTDEVGRLWTSLADYYIRRGLLEKARDIFEEGMSTVITVRDFSVIFDAYLQFEESMLSIKMENLDVSDDEDNEENGEEQEEEEEDDYRLDVEKLRKKIDSFWLKDDKDVDLRLARLEYLMDRRPELANSVLLRQNPHNVEQWHRRVKLFEGNPTKQ…	32|29	1.3|1.3	3|3	1|2	1|2	1|1	1|1	---	---	1	1	-	-	---	---	1	1	-	-	---	---	1	1	-	-	---	---	1	1	-	-	CL221.Contig10_All	88.89	6e-10	gi|357484671|ref|XP_003612623.1|	Pre-mRNA-splicing factor syf1 [Medicago truncatula] >gi|355513958|gb|AES95581.1| Pre-mRNA-splicing factor syf1 [Medicago truncatula]	50.83	0	sp|Q9HCS7|SYF1_HUMAN	Pre-mRNA-splicing factor SYF1 OS=Homo sapiens GN=XAB2 PE=1 SV=2	82.36	0	F6H863	F6H863_VITVI Putative uncharacterized protein OS=Vitis vinifera GN=VIT_00s0404g00060 PE=4 SV=1	-
80	CL7883.Contig2_All	123 590 PREDICTED: NADH dehydrogenase [ubiquinone] iron-sulfur protein 4, mitochondrial [Vitis vinifera] >gi|147858131|emb|CAN83933.1| hypothetical protein VITISV_035766 [Vitis vinifera]	21414	MASTLQRLARNSGKAYRSALAPFSRAFSREDSLVEIKPGEIGMVSGIPQEHLRRRVQVFSPARTATQQGSGKVGRWKINFLSTQKWENPLMGWTSTGDPYANVGDAALSFDSQEAAIAFAERHGWEYTVKKHQTPLLKVKSYADNFKWKGPPKTQE	23|17	5.1|5.1	1|1	1|1	1|1	1|1	1|1	---	---	-	-	-	-	---	---	-	-	-	-	---	---	-	-	-	-	---	---	-	-	-	-	CL7883.Contig2_All	87.72	2e-56	gi|296088915|emb|CBI38470.3|	unnamed protein product [Vitis vinifera]	65.61	1e-53	sp|Q9FJW4|NDUS4_ARATH	NADH dehydrogenase [ubiquinone] iron-sulfur protein 4, mitochondrial OS=Arabidopsis thaliana GN=FRO1 PE=2 SV=1	84.85	5e-27	D7UEC8	D7UEC8_VITVI Putative uncharacterized protein OS=Vitis vinifera GN=VIT_07s0151g00140 PE=4 SV=1	-
81	CL3120.Contig1_All	114 434 minus strand hypothetical protein OsI_31824 [Oryza sativa Indica Group]	14582	AASHSSMASETVLSDHSTAPEEVDKEVQSEVKKMEPEHVFAPKESAEESSCPAAPGAEAEPKIEEKQYEPPVAEEVKEISADENPKAEDLTEAAAPLAESTEQKIED	109|137	16.8|16.8	-|-	3|3	3|3	1|1	1|1	0.552	0.335	3	3	-	*	---	0.453	1	2	-	-	1.203	1.152	3	3	-	-	---	0.148	1	2	-	-	CL3120.Contig1_All	-	-	-	-	-	-	-	-	-	-	-	-	-
82	Unigene30777_All	138 230 hypothetical protein OsI_12519 [Oryza sativa Indica Group]	4486	SASKSSTPVLKDELDIVIPTIRNLDFLEMWR	87|58	64.5|64.5	-|-	4|2	1|1	2|2	1|1	---	---	1	1	-	-	---	---	-	1	-	-	---	---	1	1	-	-	---	---	-	1	-	-	Unigene30777_All	96	4e-07	gi|115473251|ref|NP_001060224.1|	Os07g0604800 [Oryza sativa Japonica Group] >gi|75133690|sp|Q6Z4G3.1|RGP3_ORYSJ RecName: Full=UDP-arabinopyranose mutase 3; Short=OsUAM3; AltName: Full=Reversibly glycosylated polypeptide 3; AltName: Full=UDP-L-arabinose mutase 3 >gi|113611760|dbj|BAF22138.1| Os07g0604800 [Oryza sativa Japonica Group]	96	1e-07	sp|Q6Z4G3|RGP3_ORYSJ	UDP-arabinopyranose mutase 3 OS=Oryza sativa subsp. japonica GN=UAM3 PE=1 SV=1	96	5e-06	B8B8B1	B8B8B1_ORYSI Putative uncharacterized protein OS=Oryza sativa subsp. indica GN=OsI_26792 PE=4 SV=1	-
83	CL7249.Contig2_All	122 4219 minus strand PREDICTED: translocase of chloroplast 120, chloroplastic-like [Vitis vinifera]	173009	QAVVDFSVMENGIGIAEDAKLGERIAVDSEVLEPSIKENVDLSLGGSKDSDGDEVFEEAVGAETPTVGSENSTMTEGGNVELIGTLENNKGNSDVFHEVHKFEEVIGAPTAVQSSEDAGAKTELLISEENHDEKQIATEKIVRDERNGLMDDSIAVNNDSAVEDGKGDNTENIDSVATAGETENINDGNEKLDKANQKPEDGISHHKSYLEALTSGDVKIVDADNREELILVMSEALEPNELSRAETDPEKLDIKTFPYEMTEIEDANKVKGGDIGSDIPENGSLDHVKLVGTLNYEDMKTAGSDALKEQIHETSSEIEEVDGAKGSGAGPRSESQSNGDALHKNEQNAILGSGHQQDTHENNSANLHSELEEDQVGEQEEKSCISCANPKDDENTELK…	-|130	-|2.3	-|-	-|4	-|3	-|2	-|1	-	1.405	-	3	-	-	-	1.03	-	3	-	-	-	0.848	-	3	-	-	-	1.106	-	3	-	*	CL7249.Contig2_All	86.18	4e-175	gi|297744642|emb|CBI37904.3|	unnamed protein product [Vitis vinifera]	77.38	0	sp|Q9SLF3|TC132_ARATH	Translocase of chloroplast 132, chloroplastic OS=Arabidopsis thaliana GN=TOC132 PE=1 SV=1	83.79	0	B9HR93	B9HR93_POPTR Predicted protein (Fragment) OS=Populus trichocarpa GN=POPTRDRAFT_200844 PE=4 SV=1	-
84	CL14287.Contig11_All	223 3279 PREDICTED: probable leucine-rich repeat receptor-like serine/threonine-protein kinase At3g14840-like [Vitis vinifera]	127313	LLALIWLVGFASGAALLPADEVESLQVIARSLGKMDWNFSVDPCSGLSGWVTQNPVKGNENAVTCNCTFDNNTICHVVSIILKAQNLNGSVPRELVRLPFLQEIDLTRNYLNGTIPPEWGSMKLVNISLLGNRVTGSIPIELANITTLANLTLEYNQLSGSIPPEFGYLRRIEKLLFTSNNLTGELPANLANLNTLRDFRISDNNFRGSIPNFIQNWTNIEKLVIQASGLTGPIPDGIASLTGLTDLRISDLNGNESTFPPLNNIRKLKTLILRSCNIVGELPSYIGEMTGLKILDLSFNKLSGPIPDSFVGLSNTDYIYLTGNSLTGPLPPWMLKHQNSIDLSYNNLTLENSESNCQQPNLNLFASSKGNTSUVSNVSSMYFPFSKYHVSIVTEADUL…	115|155	1.1|1.1	5|5	4|5	4|5	1|1	1|1	1.712	1.577	3	5	-	*	---	1.402	1	5	-	-	0.779	0.728	3	4	-	-	---	1.187	1	4	-	-	CL14287.Contig11_All	73.09	0	gi|147807566|emb|CAN66180.1|	hypothetical protein VITISV_025180 [Vitis vinifera]	56.16	0	sp|C0LGN2|Y3148_ARATH	Probable leucine-rich repeat receptor-like serine/threonine-protein kinase At3g14840 OS=Arabidopsis thaliana GN=LRR-RLK PE=1 SV=1	78.75	4e-131	B9P613	B9P613_POPTR Predicted protein (Fragment) OS=Populus trichocarpa GN=POPTRDRAFT_286171 PE=4 SV=1	BH2504_1
85	Unigene2121_All	215 658 minus strand PREDICTED: MLP-like protein 423 [Vitis vinifera] >gi|296086515|emb|CBI32104.3| unnamed protein product [Vitis vinifera]	21526	MASKVEVEVEMKSNGEKVWESIRESTTVFPKAMPHHYQSIEVLEGDGKSVGSVRLVNYSPGLSEISKPTKEKIELVDEGNKTLSYSVIDGDVLKYYNNFKASLSVIPKGDGSLVKWFCEFDKASEEIPNPDLVRDFAIKNFQDLDAYI	502|276	33.1|33.1	-|-	24|10	24|10	4|4	4|4	2.808	2.477	20	10	*	*	0.723	0.545	17	8	-	*	0.668	0.572	20	10	*	*	1.678	1.166	17	9	-	-	Unigene2121_All	62.91	7e-50	gi|462424473|gb|EMJ28736.1|	hypothetical protein PRUPE_ppa012809mg [Prunus persica]	46.62	2e-36	sp|Q93VR4|ML423_ARATH	MLP-like protein 423 OS=Arabidopsis thaliana GN=MLP423 PE=1 SV=1	62.16	1e-48	D7TNN1	D7TNN1_VITVI Putative uncharacterized protein OS=Vitis vinifera GN=VIT_01s0026g00570 PE=3 SV=1	-
86	CL267.Contig1_All	149 643 minus strand cytochrome c oxidase family protein-like [Solanum tuberosum]	20921	MWRRLSIQLRTLAPTRSTPRPTRCAVGSSTAPVNLLRSFATFSRHFATESGNVTSITVEDVMPIATGHEREELEAELKGKDVLEINYPLGPFGTKEAPAVIKSYYDKRIVGCPGVEGEDEHDVVWFWLEKGKPHECPVCSQYFVLEVVGPGGPPDGHGDDEDDHH	21|-	9.1|-	1|-	1|-	1|-	1|-	1|-	---	-	-	-	-	-	---	-	-	-	-	-	---	-	-	-	-	-	---	-	-	-	-	-	CL267.Contig1_All	89.66	3e-08	gi|242091922|ref|XP_002436451.1|	hypothetical protein SORBIDRAFT_10g002915 [Sorghum bicolor] >gi|241914674|gb|EER87818.1| hypothetical protein SORBIDRAFT_10g002915 [Sorghum bicolor]	66.2	1e-23	sp|Q9SSS5|CX5BL_ARATH	Putative cytochrome c oxidase subunit 5b-like OS=Arabidopsis thaliana GN=At1g52710 PE=2 SV=2	89.66	3e-07	C5Z3U3	C5Z3U3_SORBI Putative uncharacterized protein Sb10g002915 (Fragment) OS=Sorghum bicolor GN=Sb10g002915 PE=4 SV=1	-
87	CL14098.Contig2_All	162 1340 minus strand fructose-bisphosphate aldolase [Camellia oleifera]	49600	MACSSVVKLNAASSSWISGQQSVNQRPGSAVRFPTRRVSVVRAGSYTDELIKTAKSVASPGRGILAIDESNATCGKRLASIGLDNTETNRQAYRQLLLTTPGLGEYISGAILFEETLYQSTTDGKKFVDCLRDENIVPGIKVDKGLVPLPGSNNESWCQGLDGLASRSAEYYKQGARFAKWRTVVSIPSGPSALAVKEAAWGLARYAAISQDNGLVPIVEPEILLDGDHPIERTLEVAERVWAEVFYYLAENNVTFEGILLKPSMVTPGAEHKEKASPDTIANYTLTMLRRRVPPAVPGIMFLSGGQSEVEATLNLNAMNQSPNPWHVSFSYARALQNTVLKTWQGRPENVEAAQKALLVRAKANSLAQLGKYSAEGESEEAKKGMFVKGYTY	-|66	-|9.2	-|1	-|5	-|2	-|3	-|2	-	1.374	-	2	-	-	-	1.332	-	2	-	-	-	0.599	-	2	-	-	-	1.08	-	2	-	-	CL14098.Contig2_All	94.14	0	gi|77745483|gb|ABB02640.1|	unknown [Solanum tuberosum]	85.28	0	sp|Q9ZU52|ALFC3_ARATH	Probable fructose-bisphosphate aldolase 3, chloroplastic OS=Arabidopsis thaliana GN=FBA3 PE=1 SV=1	94.14	2e-180	Q38JH2	Q38JH2_SOLTU Fructose-bisphosphate aldolase OS=Solanum tuberosum PE=2 SV=1	XF0826
88	CL12050.Contig1_All	122 1996 unnamed protein product [Vitis vinifera]	87531	MWALRRASIHLKNRGLSSGTTRIFCVKSEIARFYLENYNAGIIESQRELLDALVYSTRSYNSSSRSLNSYMEVRTFSSEAGAKSSGEQDDNLEDAFSELETPHDAVQKAASGDEIDDESMSESELSEGESIADDIQNELETLGTETDAGEKRSLKTVATSAMIKAILAAPTLSVSQVLDKWVEAGNEVTRTEVSLTMLNLRKRRMFVKALQLSKWLESTKRLEFLESNYVSRVDLIAKLRGIYKAEEYIRQIPESFRGEVVYRTLLANCVSANNVRKSEDLFNKMKNLFPITCFSCNQLLLLYKRTDKKKIADVLLLMEKENIKPSRFTYQILIDVKGQSNDISGMEQIVETMKSEGIEPNTHIQASMARYYATGGLKDKAEAVLKEMEGGDLIKNRWA…	28|-	2.1|-	-|-	1|-	1|-	1|-	1|-	---	-	-	-	-	-	---	-	-	-	-	-	---	-	-	-	-	-	---	-	-	-	-	-	CL12050.Contig1_All	68.13	1e-138	gi|255562320|ref|XP_002522167.1|	pentatricopeptide repeat-containing protein, putative [Ricinus communis] >gi|223538605|gb|EEF40208.1| pentatricopeptide repeat-containing protein, putative [Ricinus communis]	56.06	6e-171	sp|Q9C977|PP135_ARATH	Pentatricopeptide repeat-containing protein At1g80270, mitochondrial OS=Arabidopsis thaliana GN=At1g80270 PE=1 SV=1	68.13	1e-137	B9S848	B9S848_RICCO Pentatricopeptide repeat-containing protein, putative OS=Ricinus communis GN=RCOM_0693310 PE=4 SV=1	-
89	CL1856.Contig1_All	108 335 minus strand PREDICTED: uncharacterized protein LOC100245204 [Vitis vinifera] >gi|297739671|emb|CBI29853.3| unnamed protein product [Vitis vinifera] >CL1856.Contig2_All 103 330 minus strand PREDICTED: uncharacterized protein LOC10024	10937	MAAKYIIPSLLGSMAIAYFGDYLLADQKIFGGTTPKTVSSKEWWLETDKKFQAWPRTAGPPVVMNPISRQNFIVKS	-|30	-|17.1	-|1	-|1	-|1	-|1	-|1	-	---	-	1	-	-	-	---	-	1	-	-	-	---	-	1	-	-	-	---	-	1	-	-	CL1856.Contig1_All	80.26	1e-30	gi|225441809|ref|XP_002283878.1|	PREDICTED: uncharacterized protein LOC100245204 [Vitis vinifera] >gi|297739671|emb|CBI29853.3| unnamed protein product [Vitis vinifera]	-	-	-	-	93.33	3e-17	F6HKZ7	F6HKZ7_VITVI Putative uncharacterized protein OS=Vitis vinifera GN=VIT_08s0007g08390 PE=4 SV=1	-
90	Unigene31118_All	121 897 PREDICTED: chlorophyll a-b binding protein, chloroplastic [Vitis vinifera] >gi|297738533|emb|CBI27778.3| unnamed protein product [Vitis vinifera]	32334	MALAISAAAFSSFPTREIPGKSFPGKIATWLPKRGGLNATKGPSSVCQPLPPDRPLWFPGSSPPEWLDGSLPGDFGFDPLGLGSDPELLKWFAQAELMHGRWAMLAVAGILIPEWLESLGFIENFSWYDAGAREYFADPTTLFVVQLALMGWVEGRRWADMINPGCVDIEPTFPHKKKPKPDVGYPGGLWFDPFMWGRGSPEPVMVLRTKEIKNGRLAMLAFVGFCFQAVYTGQGPIENLMAHIADPGHCNIFSAFTSQ	-|39	-|3.9	-|-	-|1	-|1	-|1	-|1	-	---	-	1	-	-	-	---	-	1	-	-	-	---	-	1	-	-	-	---	-	1	-	-	Unigene31118_All	92.04	3e-119	gi|147795581|emb|CAN69989.1|	hypothetical protein VITISV_024400 [Vitis vinifera]	70.39	2e-84	sp|P13869|CB12_PETHY	Chlorophyll a-b binding protein, chloroplastic OS=Petunia hybrida PE=2 SV=1	92.04	3e-118	A5BBT6	A5BBT6_VITVI Putative uncharacterized protein OS=Vitis vinifera GN=VITISV_024400 PE=4 SV=1	-
91	CL12796.Contig3_All	64 405 lipid transfer protein 2 [Salvia miltiorrhiza]	14923	MKAMCMVLIAAVLIVAVAPPGEAAIGCGTVVSYLNSCLPYVTDKGPLGGCCSGVKGLYAAAKTTPDRQSVCSCLKSLAASYSGVNLGKAAGLPGQCGVSIPYKISPSTDCSKVK	129|138	11.4|11.4	1|1	2|4	2|4	1|1	1|1	0.478	0.641	2	4	-	*	---	0.552	-	3	-	-	1.397	0.977	2	4	-	-	---	0.31	-	3	-	*	CL12796.Contig3_All	88.54	4e-42	gi|144601657|gb|ABP01769.1|	lipid transfer protein 2 [Salvia miltiorrhiza]	64.21	2e-27	sp|Q42952|NLTP1_TOBAC	Non-specific lipid-transfer protein 1 OS=Nicotiana tabacum GN=LTP1 PE=1 SV=1	88.54	6e-41	A5Y6Z9	A5Y6Z9_SALMI Non-specific lipid-transfer protein OS=Salvia miltiorrhiza PE=3 SV=1	-
92	CL10700.Contig1_All	314 1894 PREDICTED: peroxisomal membrane protein PEX14 [Vitis vinifera] >gi|297733783|emb|CBI15030.3| unnamed protein product [Vitis vinifera]	66804	MATTSDAPPSSTDEKPQNPVSPVIQPANDDRQDTKVEGMKESSPTSVFVNSEPIREEQVQNAVKFLSHPKVRGSPVIYRRSFLERKGLTKEEIDEAFRRVPDPTPAVTTTQSVVTNQDGQIQSSSNVQQQPSAQVLQPTPVGPVSSNSKMGTLSQFHWYHAILAVGFLAVSGAGTAVFFKNAMVPRFKSWIRKVVLEEDEEGVMKKNNAKPSIAEEAAAAAKAAAAAAADVARASQEMLMTKSEEKRCFEELINMLNVQVQEMKSMSNAIQKLEGGQSINGRIAVEEQDNQRVSRTSSRQTYANGKADTDSPSVRSFSQSASVEPSVAPHPKSYMEIMAMIQRGEKPSNIREINDAPPNPNQPVSNPRSAPRPKPWEFSQAQNSSANTFPTQESGNGSN…	39|46	3.8|3.8	1|1	1|1	1|1	1|1	1|1	---	---	1	-	-	-	---	---	-	1	-	-	---	---	1	-	-	-	---	---	-	1	-	-	CL10700.Contig1_All	73.27	4e-35	gi|209981679|gb|ACJ05392.1|	peroxisome biogenesis factor 14 [Nicotiana tabacum]	55.56	3e-06	sp|Q9R0A0|PEX14_MOUSE	Peroxisomal membrane protein PEX14 OS=Mus musculus GN=Pex14 PE=1 SV=1	73.27	4e-34	C6EWN5	C6EWN5_TOBAC Peroxisome biogenesis factor 14 (Fragment) OS=Nicotiana tabacum GN=PEX14 PE=2 SV=1	-
93	CL13165.Contig1_All	78 401 unnamed protein product [Vitis vinifera] >CL13165.Contig3_All 78 401 unnamed protein product [Vitis vinifera]	20447	SSTMVNVPKTKKTFCKSKECKKHTLHKVTQYKKGKDSLAAQGKRRYDRKQSGYGGQTKPVFHKKAKTTKKIVLRLQCQGCKHVSQHPIKRCKHFEIGGDKKGKGTSLF	20|-	4.6|-	1|-	1|-	1|-	1|-	1|-	---	-	-	-	-	-	---	-	-	-	-	-	---	-	-	-	-	-	---	-	-	-	-	-	CL13165.Contig1_All	100	1e-24	gi|334361904|gb|AEG78309.1|	60S ribosomal protein L36/44, partial [Cucurbita pepo]	98.1	2e-45	sp|Q96499|RL44_GOSHI	60S ribosomal protein L44 OS=Gossypium hirsutum GN=RPL44 PE=3 SV=3	99.05	8e-44	Q00508	Q00508_CANMA Ribosomal protein L41 OS=Candida maltosa PE=3 SV=1	SPAC15E1.03
94	CL2330.Contig1_All	194 1837 minus strand PREDICTED: putative clathrin assembly protein At5g35200-like [Glycine max] >CL2330.Contig2_All 300 1943 minus strand PREDICTED: putative clathrin assembly protein At5g35200-like [Glycine max]	68971	SGGTQNSLRKTLGALKDTTTVSLAKINSGYKELDIAIVKATNHVERPAKERHIRAVFAAISATRPRADVAYCIHALARRLSKTHNWAVALKTLIVIHRALREVDPTFQEEIINYGRSRSHMLNLAHFKDDSSPNAWDYSSWVRSYALFLEERLECFRVLKYDIEADRLRTKDLDTPELLEHLPALQQLLYRVLGCQPQGAAIHNFIIQLALSMVASESIKIYNAISDGTVNLVDKFFEMQRHDALKALDIYRRAGQQAERLSEFYEICKTLDVGRGERFIKIEQPPASFIQAMEEYVREAPRSSTARKDLADDKPKAILAIEYKKSSEVKEERPPSPSPPEPEPEPEVEPVKVEAPASEPPPDLLGLHEPVPAASELDEKNAMALAIVPVGVAEQPGST…	35|38	2.2|2.2	-|-	1|2	1|2	1|1	1|1	---	0.845	-	2	-	-	---	---	1	-	-	-	---	0.617	-	2	-	-	---	---	1	-	-	-	CL2330.Contig1_All	79.42	0	gi|356548512|ref|XP_003542645.1|	PREDICTED: putative clathrin assembly protein At5g35200-like [Glycine max]	65.33	5e-173	sp|Q9LHS0|CAP10_ARATH	Putative clathrin assembly protein At5g35200 OS=Arabidopsis thaliana GN=At5g35200 PE=1 SV=1	79.42	0	I1LZR5	I1LZR5_SOYBN Uncharacterized protein OS=Glycine max GN=Gma.25559 PE=4 SV=1	-
95	CL11323.Contig1_All	233 709 transcription factor, putative [Ricinus communis] >gi|223529192|gb|EEF31168.1| transcription factor, putative [Ricinus communis]	20422	LVKISFCQEGFCSAPSILDAQPLYWKVTNPTLSPSHLQDLPGFTRSVYKRDHALITPESHVFSPLPEWTNTLGAYLITPSMGSHFVMYLAKMQENSKSGLPPRDVERFAFVLQGVVTLSDTSGIKHKLEVDSYAYLPPNLEHWLNSDASATLVVFERRF	-|55	-|11.9	-|2	-|1	-|1	-|1	-|1	-	---	-	1	-	-	-	---	-	1	-	-	-	---	-	1	-	-	-	---	-	1	-	-	CL11323.Contig1_All	82.2	2e-52	gi|359497669|ref|XP_002267073.2|	PREDICTED: uncharacterized protein LOC100251394, partial [Vitis vinifera]	-	-	-	-	81.34	2e-57	B9MUV7	B9MUV7_POPTR Predicted protein OS=Populus trichocarpa GN=POPTRDRAFT_589924 PE=4 SV=1	DR1152
96	Unigene27430_All	137 757 minus strand chalcone flavonone isomerase [Prunus persica] >Unigene47292_All 105 725 minus strand chalcone flavonone isomerase [Prunus persica]	28765	TEAVMVDEVPFPPQVSTTKTLSLLGHGITDIEIHFLQIKFTAIGVYMDPQIVSHLKKWKGKAATDLAEDDDFFEAIISAPVEKLVRVVVIKEIKGSQFGVQMESAVRDRLAAVDKYEEEEEEALEQVVDFFQSKYFKKDSILTFYFPATSPTAEIVFATEGKEDSKIEVKNANVVEMIQKWYLGGTRAVSPSTISSLATALSAELSK	-|43	-|9.7	-|-	-|1	-|1	-|1	-|1	-	---	-	-	-	-	-	---	-	-	-	-	-	---	-	-	-	-	-	---	-	-	-	-	Unigene27430_All	81.72	2e-79	gi|444475579|gb|AGE10598.1|	chalcone isomerase [Lonicera japonica]	37.96	2e-17	sp|O65333|CFI_ELAUM	Chalcone--flavonone isomerase OS=Elaeagnus umbellata GN=CHI PE=2 SV=1	80.65	2e-77	A5BMU2	A5BMU2_VITVI Putative uncharacterized protein OS=Vitis vinifera GN=VITISV_012581 PE=4 SV=1	-
97	CL4634.Contig1_All	72 1841 putative isopropylmalate synthase [Capsicum annuum]	75524	ITPFPYTTFPTNRIPLRSFNLFKYNAPPATSIRCSLRRPEYIPNHILDPKYVRIFDTTLRDGEQSPGATMTTKEKLDIARQLARLGVDIIEAGFPASSEADFEAVKLIARDVGNVESDHVPVICGLARCNKRDIDKAWEAVMFAKKPRIHTFIATSEIHMKFKLKMTPEQVIEKARSMVAYARSLGCNDVEFSPEDAGRSDREFLYQILGEVIKSGATTLNIPDTVGYTLPTEFGQLIADIKANTPGIENVIISTHCQNDLGLSTANTLAGAHAGARQLEVTINGIGERAGNASLEEVVMALKCRGEQVLDGLHTGINTQHIIMASKMVEEYSGLRVQPHKAIVGANAFAHESGIHQDGMLKHKNTYEIISPEDIGLLRSNESGIVLGKLSGRHALKAK…	-|90	-|8.8	-|-	-|5	-|5	-|4	-|4	-	0.636	-	5	-	-	-	0.71	-	4	-	-	-	1.689	-	4	-	-	-	0.583	-	3	-	-	CL4634.Contig1_All	88.89	5e-30	gi|297611222|ref|NP_001065720.2|	Os11g0142500 [Oryza sativa Japonica Group] >gi|255679780|dbj|BAF27565.2| Os11g0142500 [Oryza sativa Japonica Group]	81.66	0	sp|O04973|LEU1A_SOLPN	2-isopropylmalate synthase A OS=Solanum pennellii GN=IPMSA PE=2 SV=1	88.69	4e-140	E2JAX2	E2JAX2_IPOPU Alpha isopropylmalate synthase (Fragment) OS=Ipomoea purpurea GN=IPMS PE=2 SV=1	slr0186
98	CL10292.Contig1_All	159 494 minus strand predicted protein [Populus trichocarpa] >gi|118482276|gb|ABK93065.1| unknown [Populus trichocarpa] >gi|222865280|gb|EEF02411.1| predicted protein [Populus trichocarpa] >Unigene1340_All 159 494 predicted protein [Populus t	16871	MVKGRQGERVRLYVRGTILGYKRSKSNQYPNTSLVQIEGVNTQEEVAWYLGKRMAYIYKAKVKKNGSHYRCIWGKVTRPHGNSGVVRAKFKSNLPPKSMGARVRVFMYPSNI	-|21	-|13.4	-|1	-|2	-|2	-|2	-|2	-	---	-	-	-	-	-	---	-	-	-	-	-	---	-	-	-	-	-	---	-	-	-	-	CL10292.Contig1_All	97.32	3e-58	gi|224112609|ref|XP_002316240.1|	predicted protein [Populus trichocarpa] >gi|118482276|gb|ABK93065.1| unknown [Populus trichocarpa] >gi|222865280|gb|EEF02411.1| predicted protein [Populus trichocarpa]	95.54	3e-57	sp|Q9C912|R35A3_ARATH	60S ribosomal protein L35a-3 OS=Arabidopsis thaliana GN=RPL35AC PE=3 SV=1	97.32	3e-57	A9P9L2	A9P9L2_POPTR Predicted protein OS=Populus trichocarpa GN=POPTRDRAFT_833785 PE=4 SV=1	YOR234c
99	CL4938.Contig1_All	269 1315 minus strand RecName: Full=8-hydroxygeraniol dehydrogenase; Short=Cr10HGO >gi|34013695|gb|AAQ55962.1| 10-hydroxygeraniol oxidoreductase [Catharanthus roseus]	46241	VKAVGWAARDPSGVLSPLKFARRATGDRDVQFKVLYCGICHSDLHSIKNEWGSSQYPLIPGHEIVGVVTEVGSKVQKFKVGDKVGVGCMVNSCRKCDQCVNNLENYCPQPLFTYNSVEPDGSLTFGGYSDIMVADEDFIIRWPENFPLDKGAPLLCAGITTYSPLRHFGLDKPGLRVGVVGLGGLGHVAVKFAKAFGTKVTVISTSASKKKEAIESLGADAFLISRDPAEMQAAAGTLDGIIDTVSALHPIQPLLSLLKPHGKLIVVGAPEKPLELPVFPLITARRTVAGSMIGGLKETQEMIDFAAKHNILPDVEMVSMDYVNTAMERLAKADVKYRFVIDVGKTLKA	309|264	14.6|12.9	-|-	16|10	7|7	4|4	2|3	0.872	0.945	5	5	-	-	0.889	0.869	2	2	-	-	1.136	0.722	3	4	-	-	0.913	0.882	3	3	-	-	CL4938.Contig1_All	79.08	9e-153	gi|75324836|sp|Q6V4H0.1|10HGO_CATRO	RecName: Full=8-hydroxygeraniol dehydrogenase; Short=Cr10HGO >gi|34013695|gb|AAQ55962.1| 10-hydroxygeraniol oxidoreductase [Catharanthus roseus]	79.08	3e-153	sp|Q6V4H0|10HGO_CATRO	8-hydroxygeraniol dehydrogenase OS=Catharanthus roseus GN=10HGO PE=1 SV=1	79.08	1e-151	Q6V4H0	Q6V4H0_CATRO 10-hydroxygeraniol oxidoreductase OS=Catharanthus roseus PE=2 SV=1	SMc00680
100	CL3159.Contig8_All	1 282 Heat shock protein 70 [Nicotiana tabacum]	13625	YNMRNTVKDEKIASKLPAADKKKIEDAIESSIQWLDANQLAEADEFEDKMKELESICNPIIAKMYQGAGGEVPMDDDSPAPSGSGAGPKIEEVD	48|52	27.7|27.7	-|-	1|1	1|1	1|1	1|1	---	---	-	1	-	-	---	---	-	-	-	-	---	---	-	1	-	-	---	---	-	-	-	-	CL3159.Contig8_All	92.42	2e-29	gi|189380223|gb|ACD93209.1|	heat shock protein 70 [Camellia sinensis]	82.98	2e-32	sp|P27322|HSP72_SOLLC	Heat shock cognate 70 kDa protein 2 OS=Solanum lycopersicum GN=HSC-2 PE=2 SV=1	92.42	3e-28	B3GPH1	B3GPH1_CAMSI Heat shock protein 70 OS=Camellia sinensis PE=2 SV=1	SPAC13G7.02c
101	CL7252.Contig1_All	217 3540 minus strand PREDICTED: protease Do-like 7-like [Vitis vinifera]	137689	MERLGSETALAGMETSMKEELCMEIDPPFKENPATAEDWRKALNKVVPAVVVLRTTACRAFDTESAGASYATGFVVDKCRGIILTNRHVVKPGPVVAEAMFVNREEIPVYPIYRDPVHDFGFFRYDPSAIQFLSYEEIPLAPEAACVGLEIRVVGNDSGEKVSILAGTLARLDRDAPHYKKDGYNDFNTFYMQAASGTKGGSSGSPVIDWQGRAVALNAGSKTSSASAFFLPLERVVRALRFLQKGKESITNTWEAVTIPRGTLQATFLHKGFDETRRLGLRSKTEQIVRNASPPGETGMLVVDSVVPHGPAHKHLEPGDVLVRLNGEVTTQFLKMENLLDDSVNNKVELQIERGGKHLTVDLTVQDLHSVTPDHFLEVGGAVIHPLSYQQARNFRFQC…	21|35	0.9|0.9	5|5	1|1	1|1	1|1	1|1	---	---	-	1	-	-	---	---	-	-	-	-	---	---	-	-	-	-	---	---	-	1	-	-	CL7252.Contig1_All	90.91	2e-81	gi|147795538|emb|CAN65467.1|	hypothetical protein VITISV_040526 [Vitis vinifera]	75.72	0	sp|Q8RY22|DEGP7_ARATH	Protease Do-like 7 OS=Arabidopsis thaliana GN=DEGP7 PE=2 SV=1	90.91	3e-80	A5BBU0	A5BBU0_VITVI Putative uncharacterized protein OS=Vitis vinifera GN=VITISV_040526 PE=4 SV=1	SPBC1685.05
102	CL7404.Contig1_All	124 1074 ACC oxidase [Boea hygrometrica] >CL7404.Contig2_All 228 1178 minus strand ACC oxidase [Boea hygrometrica]	45050	MATFPVINMEKLNGEERAATMEMIKDACENWGFFELLNHGIAPEFMDTVERLTKEHYRKCMEQRFKEMVESKGLEAVQSEINDLDWESTFFLRHLPVSNISEIPDLEEEYRKVMKEFAAQLEKLAEQLLDLLCENLGLEKGYLKKAFYGSKGPTFGTKVSNYPPCPKPELIKGLRAHTDAGGIILLFQDDKVSGLQLLKDGEWVDVPPMRHSIVINIGDQLEVITNGKYKSVMHRVIAQTDGARMSIASFYNPGSDAVIYPAPALVEKEEKKDLYPKFVFEDYMKLYAGLKFQAKEPRFEAFKTMESTANLGPIATA	75|109	10.1|15.8	1|1	5|7	5|7	3|4	3|4	1.105	1.004	5	6	-	-	1.2	0.648	5	5	-	-	0.426	0.655	5	6	*	-	0.558	0.407	5	5	-	*	CL7404.Contig1_All	93.75	1e-137	gi|33090361|gb|AAP94013.1|	ACC oxidase AC01 [Antirrhinum majus]	88.36	6e-155	sp|P31237|ACCO_ACTDE	1-aminocyclopropane-1-carboxylate oxidase OS=Actinidia deliciosa GN=ACO PE=2 SV=1	93.9	2e-119	H9BQA6	H9BQA6_9LAMI ACC oxidase (Fragment) OS=Plectranthus hilliardiae x Plectranthus saccatus PE=2 SV=1	PA4191
103	CL11288.Contig2_All	426 1766 minus strand predicted protein [Populus trichocarpa] >gi|222839082|gb|EEE77433.1| predicted protein [Populus trichocarpa]	55099	SLASNNGASSTSEERVAVLVIGGGGREHALCYALKRSPSCDAVFCAPGNAGISNSGDATCVEYLNISDSSSVIAFCREWGIGLVVVGPEAPLVAGLANDLVKAGILTFGPSSEAAALEGSKDFMKRLCDKYAIPTAKYQTFTDPLAAKAYIKDQGVPIVVKADGLAAGKGVIVAMTLEEAYEAVDSMLVKNAFGSAGCRVIVEEYLEGEEASFFALVDGENAIPLESAQDHKRVGDGDTGPNTGGMGAYSPAPILTKELQSVVMTSIILPTVKGMAAEGCKFVGVLYAGLMIERKSGLPKLIEYNVRFGDPECQVLMVRLESDLVQVLLAACKGELSGVSLDWSPGSAMVVVMASKGYPGSYKKGAVIQNLEEAEEVAPTVKVFHAGTALDSDGNYIAT…	19|-	3.6|-	-|-	1|-	1|-	1|-	1|-	---	-	-	-	-	-	---	-	-	-	-	-	---	-	-	-	-	-	---	-	-	-	-	-	CL11288.Contig2_All	88.89	3e-47	gi|224099757|ref|XP_002334445.1|	predicted protein [Populus trichocarpa] >gi|222872224|gb|EEF09355.1| predicted protein [Populus trichocarpa]	85.57	5e-145	sp|P52421|PUR2_VIGUN	Phosphoribosylamine--glycine ligase (Fragment) OS=Vigna unguiculata GN=PUR2 PE=2 SV=1	86.9	0	F6HRD3	F6HRD3_VITVI Putative uncharacterized protein OS=Vitis vinifera GN=VIT_12s0028g00260 PE=3 SV=1	AGc1152
104	CL1558.Contig3_All	106 1584 minus strand hypothetical protein VITISV_000979 [Vitis vinifera]	65654	MGCCGSKEHLPRSAEKDQWQQQHGHRRSSSVNGASTGGFAEFSLAELKSATNNFSSDNIVSESGEKAPNVVYEGRLQNHRWIAVKKFTKMAWPDPKQFAEEAKEVGKLRHKRLANLIGYCCDGDERLLVAEFMPNETLAKHLFHWENQTPEWAMRLRVALYIAEALDYCSREDRPLYHDLNAYRVLFDENGDPRLSCFGLMKNSRDGKSYSTNLAYTPPEYLRNGRVTQESVVFSFGTVLLDLLSGKHIPPSHALDMIRGKNILLLMDSHLEGNFSTEEATVVFDLASQCLQYEPRERPKTKDLVSTLAPLQNKNDVPSYVMLGIPKREEAPSTPPHPLSPMGDACSRMDLTAIHQFLVMQHYKDDEGTNELSFQEWTQQMRDMLDARKRGDLAFRDKD…	-|38	-|2.8	-|6	-|1	-|1	-|1	-|1	-	---	-	1	-	-	-	---	-	1	-	-	-	---	-	1	-	-	-	---	-	1	-	-	CL1558.Contig3_All	90.07	4e-71	gi|359492604|ref|XP_003634442.1|	PREDICTED: probable serine/threonine-protein kinase At4g35230 [Vitis vinifera]	87.25	0	sp|Q944A7|Y4523_ARATH	Probable serine/threonine-protein kinase At4g35230 OS=Arabidopsis thaliana GN=At4g35230 PE=1 SV=1	89.43	8e-60	E5DHS4	E5DHS4_CARPA Brassinosteroid signaling kinase 11 (Fragment) OS=Carica papaya PE=2 SV=1	lin1934_1
105	Unigene14101_All	277 1419 minus strand RecName: Full=Alcohol dehydrogenase 1 >gi|20506|emb|CAA38039.1| alcohol dehydrogenase [Petunia x hybrida]	50531	SITAGQVIKCKAAVAWEPGKPLVIEEVEVAPPQKMEVRLKILFTSLCHTDVYFWEAKGQTPLFPRIFGHEAGGIVESVGDGVTDLKLGDHVLPVFTGECKECRHCKSAESNMCDLLRINTDRGVMIEDGKTRFFKDGQPIYHFLGTSTFSEYTVVHVGCVAKINPAAPLDKVCVLSCGISTGLGATLNVAKPTKGSTVAIFGLGAVGLAAAEGARIAGASRIIGVDLHSSRFTEAKKFGLTEFVNPNDYDKPVQQVIAEMTDGGVDRSVECTGNVNAMISAFECVHDGWGVAVLVGVPNKDDAFKTHPVNFLNERTLKGTFFGNYKPRSDIPSVVEKYINKELDLELEKFITHQIPFSEINKAFEYMERRESIRCIITMEH	39|-	5.5|-	2|-	1|-	1|-	1|-	1|-	---	-	1	-	-	-	---	-	1	-	-	-	---	-	1	-	-	-	---	-	1	-	-	-	Unigene14101_All	89.53	0	gi|113363|sp|P25141.1|ADH1_PETHY	RecName: Full=Alcohol dehydrogenase 1 >gi|20506|emb|CAA38039.1| alcohol dehydrogenase [Petunia x hybrida]	89.53	0	sp|P25141|ADH1_PETHY	Alcohol dehydrogenase 1 OS=Petunia hybrida GN=ADH1 PE=3 SV=1	89.34	3e-100	F6I0F6	F6I0F6_VITVI Putative uncharacterized protein OS=Vitis vinifera GN=VIT_04s0044g01120 PE=3 SV=1	YPO1502
106	CL11184.Contig2_All	232 621 minus strand 60S ribosomal protein L22, putative [Ricinus communis] >gi|223544027|gb|EEF45553.1| 60S ribosomal protein L22, putative [Ricinus communis] >CL11184.Contig3_All 308 697 60S ribosomal protein L22, putative [Ricinus communis	20474	MSKGGGAGSGGAQKGGKKKASAFVIDCAKPVEDKIMDIASLEKFLQERIKVAGKAGALGDSVTVTRDKTKISVTANDTAFSKRYLKYLTKKYLKKNNVRDWLRVIASNKDRSVYELRYFNIAENEAEEED	23|40	6.9|16.2	1|-	1|2	1|2	1|2	1|2	---	1.057	-	2	-	-	---	1.713	-	2	-	-	---	0.519	-	2	-	-	---	0.926	-	2	-	-	CL11184.Contig2_All	89.81	2e-40	gi|351726188|ref|NP_001236862.1|	uncharacterized protein LOC100305544 [Glycine max]	84.26	3e-38	sp|Q9M9W1|RL222_ARATH	60S ribosomal protein L22-2 OS=Arabidopsis thaliana GN=RPL22B PE=2 SV=1	89.81	3e-39	C6SVK2	C6SVK2_SOYBN Uncharacterized protein OS=Glycine max GN=Gma.17716 PE=4 SV=1	-
107	CL1892.Contig6_All	156 1976 minus strand PREDICTED: uncharacterized protein LOC100262769 [Vitis vinifera]	86240	MGKSTKKSASKVDAAAAVAAPTKPLKKGKREAEGAVEKEVLSAKKQKAEEKKREIKNVKKVVKKKDKTSSEEDTSSESEHQPKVKVSAKNGHVDSDSEDESSGLEEDASAPKKKPAIAAKNGHVAAAKKKDESSDDSDSTSEDETSLDEDVAAAKKAPVSLIKTGPVAPAKKKDETSDDSDSSSEDETSSDGDVAAAKKAPAALSEKKSLVSTQKKDESSSDESESEDETSSDENVATAKKGPAAPTKKGPVAATKKKDESSTDDESSDEDDVTAKNNSAAVTKKKDESSEESDDSSSSDDDDSDVKMTDVATTKGNAGKGGSPFEKTPKTPATPKEQTTGSKTLFVGNLSFSVEQEDVVNFFKAAGEVVDVRFATNSDNSFRGFGHVEFASAEAAEKA…	76|-	5.3|-	-|-	3|-	3|-	3|-	3|-	---	-	1	-	-	-	---	-	-	-	-	-	---	-	1	-	-	-	---	-	-	-	-	-	CL1892.Contig6_All	68.16	1e-73	gi|224096554|ref|XP_002310655.1|	predicted protein [Populus trichocarpa] >gi|222853558|gb|EEE91105.1| predicted protein [Populus trichocarpa]	62.07	1e-67	sp|Q7XTT4|NUCL2_ORYSJ	Nucleolin 2 OS=Oryza sativa subsp. japonica GN=Os04g0620700 PE=2 SV=2	68.25	3e-41	F6HDX7	F6HDX7_VITVI Putative uncharacterized protein OS=Vitis vinifera GN=VIT_05s0020g00100 PE=4 SV=1	ECU03g0730
108	CL2049.Contig1_All	74 1816 minus strand polyphenol oxidase [Sesamum indicum]	74863	MASLHLPCAATTTPSSKSRSSPRPLFAKPSHFITHAKRSHRLQVSCANQNDSSQNVETPQGKVDRRNMLLGLGGLYGAANLISTPGASANPVQAPELDKCGVATNLNTGQQLDVNCCPPTSQRIIDYRLPPVFQMKLRPSAHRVSPEYIFKYNMAIDRMKRLPADDPRSFMQQANIHCAYCNGAYDQPGQGSLDLQVHNSWLFFPFHRWYLYFYERILGKLIGDPTFALPFWNWDNPKGMTIPPMFLDPKAALYDSKRNQDNLKAVVDLGMTGNKDPLQVVANNLTIMYSEMIRGNADVYDFMGQPYREGTAVNPGPGSSERGSHTAVHVFVGDPREPSGEDLGNFYSAGRDALFYCHHANVDRMWTLWQYFLPSNKVPDKKITDPDFLNASFLFYDEN…	810|350	21.9|16.0	-|-	35|14	26|10	10|7	8|5	1.279	1.16	19	6	*	-	0.784	0.775	15	4	*	-	1.072	1.128	18	6	-	-	0.921	0.977	16	4	-	-	CL2049.Contig1_All	86.2	0	gi|386870493|gb|AFJ42577.1|	polyphenol oxidase [Sesamum indicum]	51.46	1e-127	sp|Q9ZP19|PPO1_IPOBA	Polyphenol oxidase I, chloroplastic OS=Ipomoea batatas GN=co-1 PE=1 SV=1	50	7e-68	B2CKK8	B2CKK8_FRAAN Polyphenol oxidase (Fragment) OS=Fragaria ananassa GN=ppo PE=2 SV=1	-
109	CL1734.Contig1_All	551 3652 minus strand RecName: Full=Glycine dehydrogenase [decarboxylating], mitochondrial; AltName: Full=Glycine cleavage system P protein; AltName: Full=Glycine decarboxylase; Flags: Precursor >gi|2894362|emb|CAB16918.1| P-Protein precursor [S	132559	MERARKLANRAILKRLVSESKQQPLYKSSRYVSSLSPSVVQGRSNVSKVHSFKSRSLVQFVGTRSISIEALKPSDTFPRRHNSATPEEQSKMAEFVGYNSLDALIDATVPKSIRIDKMEFPIFDEGLTEAQMIEHMKDLASKNKVFKSYIGMGYYNTFVPPVILRNIMENPGWYTQYTPYQAEISQGRLESLLNFQTMITDLTGLPMSNASLLDEGTAAAEAMAMCNNIQKGKKKTFVIAGNCHPQTIDVCKTRADGFDLKVVVSDIKDIDYKSGDVCGVLVQYPGTEGEILDYGEFIKNAHANGVKVVMASDLLALTMLKPPGELGADIVVGSAQRFGVPMGYGGPHAAFLATSQEYKRMMPGRIIGVSVDSSGKPALRMAMQTREQHIRRDKATSNI…	503|809	15.5|15.5	-|-	29|33	29|33	11|11	11|11	1.054	1.306	20	18	-	-	1.082	1.032	18	17	-	-	0.726	0.811	18	16	-	-	0.804	1.054	18	19	-	-	CL1734.Contig1_All	91.29	6e-135	gi|349592189|gb|AEP95746.1|	glycine decarboxylase complex subunit P [Cicer arietinum]	87.91	0	sp|O49954|GCSP_SOLTU	Glycine dehydrogenase [decarboxylating], mitochondrial OS=Solanum tuberosum GN=GDCSP PE=2 SV=1	88.28	0	I1JTW8	I1JTW8_SOYBN Uncharacterized protein OS=Glycine max PE=4 SV=1	all4607_2
110	CL4548.Contig3_All	122 1684 PREDICTED: glucose-1-phosphate adenylyltransferase large subunit 1, chloroplastic [Vitis vinifera]	68127	MAVTANGRIALSATGQLHGPARFYGRNGRLVKFCNGELMGEKMKFAPLQQRNKSNAITSPVCNSLTADFAGETKLRDLEMEKRDPRTVVAIILGGGAGTRLFPLTKRRAKPAVPIGGAYRLIDVPMSNCINSGINKVYILTQFNSASLNRHLARAYNFGSGVTFGDGYVEVLAATQTPGETGKNWFQGTADAVRQFHWLFEDPRSKDIEDVLILSGDHLYRMDYMDFVQNHRQSGADITISCLPIDDSRASDFGLMKIDNKGRVLSFSEKPKGNDLKAMAVDTTVLGLSRDEAEKKPYIASMGVYVFKKEILLNLLRWRFPTANDFGSEIIPASAREFFIKAYLFNDYWEDIGTIRSFFEANLALTEHPPRFSFYDATKPIYTSRRNLPPSKIDSSKIV…	175|267	9.6|13.1	-|-	10|18	3|18	4|6	1|6	0.709	1.348	3	6	-	*	0.825	1.139	2	4	-	-	0.857	1.267	3	7	-	-	1.167	1.99	2	4	-	*	CL4548.Contig3_All	88.67	0	gi|41350645|gb|AAS00543.1|	ADP-glucose pyrophosphorylase large subunit [Fragaria x ananassa]	84.54	0	sp|P55243|GLGL3_SOLTU	Glucose-1-phosphate adenylyltransferase large subunit 3, chloroplastic/amyloplastic OS=Solanum tuberosum GN=AGPS3 PE=2 SV=1	88.67	3e-180	Q6R2I6	Q6R2I6_FRAAN Glucose-1-phosphate adenylyltransferase (Fragment) OS=Fragaria ananassa GN=gpL2 PE=2 SV=1	all4645
111	Unigene22014_All	185 1051 minus strand PREDICTED: translocase of chloroplast 159, chloroplastic-like [Vitis vinifera]	36739	MDSKEATSQPISEAASGSSTSSSFPCSDSFENETLLNKTTALNDNNDENSRSDSKGTVSEDEGYVSGNEEFETELDKPVLDETVGVAIGEENSDALAKLESLPISGVIVNGGDDVEKGNKDTEGHEKVMGKDLEGGFAADDSTEGKFSGVEGFDKKGEVLDSVDNLGVNPNEGVVEGGEIVDGKEGKVVVEEVEMKGEESEKKGKSGSLSVGDEVSEAQLKEVSEVAAVEPEEPEFIDTGDVKPTPEGDSVVDTIQADVAGPGIVVVGGTEENGDVVNKPVEEVVAEVA	313|483	17.0|17.0	-|-	11|15	11|15	4|4	4|4	1.301	1.929	10	15	-	*	0.86	1.053	10	15	*	-	1.02	0.844	10	15	-	*	1.123	1.644	10	15	-	*	Unigene22014_All	-	-	-	-	-	-	-	-	-	-	-	-	-
112	CL12192.Contig2_All	15 704 unnamed protein product [Vitis vinifera]	31081	KIKERKKKQKPLSFSSMEKVEGAIPTTEQPKEESASSAEAAVTAHHLTLPSGLTQEEFEDLKPAVTEFHNYRVNSGQCSSLLAQHVQAPPKDVWSIVRHFDKPQMYKHFIKSCSVREGFSMKVGDLRDVSVISGLPAATSTERLDILDDERRVTGFSIIGGDHRLRNYRSVTTVHEVEHREVGIYTIVLESYVVDVPDGNTEEDTRLFADTVVKLNLQKLASVAESRVYD	40|-	10.4|-	1|-	2|-	2|-	2|-	2|-	---	-	1	-	-	-	---	-	-	-	-	-	---	-	1	-	-	-	---	-	-	-	-	-	CL12192.Contig2_All	75.53	4e-74	gi|224126473|ref|XP_002329563.1|	predicted protein [Populus trichocarpa] >gi|222870272|gb|EEF07403.1| predicted protein [Populus trichocarpa]	70.79	4e-65	sp|O49686|PYR1_ARATH	Abscisic acid receptor PYR1 OS=Arabidopsis thaliana GN=PYR1 PE=1 SV=1	75.53	4e-73	B9N2N0	B9N2N0_POPTR Predicted protein OS=Populus trichocarpa GN=POPTRDRAFT_783700 PE=4 SV=1	-
113	CL13735.Contig1_All	315 1661 minus strand predicted protein [Populus trichocarpa] >gi|222861628|gb|EEE99170.1| predicted protein [Populus trichocarpa]	59125	MEALKAVGLTPLSVLAKRTEPKKNLSLATISPFKNQSFPNFSNSDCAFSVSRTLQGGLVLLSSFLKSELAKALTYDETLQQSISSSSTSDFDVGGVLDSFSSFAAENPIIIGCGAAVLGVPLVVSQLISKPKPWGVESAKAAYAKLGDDANAQLLDIRAPAEIKQVGSPDIRGLKKKPVAVVYKGEDKPGFLNKLSLKFKEPENTTLFILDKFDGNSELVAELVTTNGFKAAYAIKDGAEGSRGWKNSGLPWILPKKALSLDISNLTDAFGLDLQEASDTLPLTLGVAAAAGLGLLAFTEVETILQVLGSAALVQFVSKKLLFAEDRKQTIQQIEELLNTKVAPKELVGDIKQIGSALLPSPVTSKALPAPAEVTPAPSNSAVQKSESVPEVNSVPPKV…	233|189	15.4|18.3	-|-	10|10	3|3	5|6	1|1	0.461	0.814	2	2	-	-	---	1.656	-	2	-	-	1.782	0.723	2	2	*	-	---	0.958	-	2	-	-	CL13735.Contig1_All	78.99	8e-48	gi|159164082|pdb|2DCQ|A	Chain A, Fully Automated Nmr Structure Determination Of The Rhodanese Homology Domain At4g01050(175-295) From Arabidopsis Thaliana	62.17	1e-113	sp|Q9M158|STR4_ARATH	Rhodanese-like domain-containing protein 4, chloroplastic OS=Arabidopsis thaliana GN=STR4 PE=1 SV=2	63.09	6e-133	B9I8W2	B9I8W2_POPTR Predicted protein OS=Populus trichocarpa GN=POPTRDRAFT_731296 PE=4 SV=1	RP600
114	CL8527.Contig2_All	120 1154 PREDICTED: GDSL esterase/lipase At1g29670 [Vitis vinifera] >gi|297735754|emb|CBI18441.3| unnamed protein product [Vitis vinifera]	40637	LCFFLLPLVILQTLVLGEPQVPCFFIFGDSLVDNGNNNYRETTAKVNFFPYGIDFPAGPTGRFTNGRNIADIIAELLGFDEYIPPFANASNQDILRGVNYGSGGAGILDETGRHFGDIISLNEQLSNHEVAVSRIAEILGSESAAKQHLSACIYSIGMGSNDYLGNYLPQFYASTTPYTPQQFAALLIAQYSNQLRKLYDNGARKVAVSGLGKLGCVPQELATYGSSHASSCVETSNNAVQIFNENLKLLINHLNNHLPDAKFVYTRDSSSASSYGNISILSDPCCPVSTEIGGGHCLPGAVPCSNRDEYMFWDAFHPTEAANLNSAKIAYTDMSPLYADPIAIW	-|21	-|4.9	-|-	-|1	-|1	-|1	-|1	-	---	-	-	-	-	-	---	-	-	-	-	-	---	-	-	-	-	-	---	-	-	-	-	CL8527.Contig2_All	61.49	2e-51	gi|255641535|gb|ACU21041.1|	unknown [Glycine max]	49.7	2e-83	sp|Q9C7N4|GDL15_ARATH	GDSL esterase/lipase At1g29670 OS=Arabidopsis thaliana GN=At1g29670 PE=2 SV=1	61.49	2e-50	C6TGT9	C6TGT9_SOYBN Putative uncharacterized protein OS=Glycine max PE=2 SV=1	-
115	CL4002.Contig14_All	273 2879 minus strand alanyl-tRNA synthetase [Micromonas sp. RCC299] >gi|226520102|gb|ACO66091.1| alanyl-tRNA synthetase [Micromonas sp. RCC299]	115981	DWPATRVRETFIKFFEDKAHVNWKSSPVVPHNDPTLLFANAGMNQFKPIFLGTADPNTELSKLRRACNTQKCIRAGGKHNDLDDVGKDTYHHTFFEMLGNWSFGDYFKNEAIEWAWELLTKVYKLPGDRIYATYFGGDEKLGLPADVEAKDNWLKFLPPSRVLPFGCKDNFWEMGDTGPCGPCTEIHFDRIGNRDAASFVNNDDPTVIEIWNLVFIQFNRESDGSLKSLPAKHVDTGMGFERLTSILQNKMSNYDADVFLPIFDAIQUAMRGVNLCUGGSFDELUDMVLKSLRHSKVSSTGTNVQIIUFSUNIPLHRTYRHLUWTTSWUTLUURSWVMFFSELKQHAIKIRKIIADEEASFGRTLVKGIEKFMKAAQELQGTIHSGQSTLLLAGCWYUG…	112|-	4.8|-	5|-	9|-	9|-	4|-	4|-	1.166	-	6	-	-	-	1.345	-	4	-	-	-	0.514	-	6	-	*	-	1.32	-	4	-	-	-	CL4002.Contig14_All	88.12	7e-50	gi|376335080|gb|AFB32235.1|	hypothetical protein 0_1116_02, partial [Pinus mugo] >gi|376335082|gb|AFB32236.1| hypothetical protein 0_1116_02, partial [Pinus mugo] >gi|376335084|gb|AFB32237.1| hypothetical protein 0_1116_02, partial [Pinus mugo]	68.68	2e-114	sp|Q9VLM8|SYAC_DROME	Alanine--tRNA ligase, cytoplasmic OS=Drosophila melanogaster GN=Aats-ala PE=2 SV=1	78.57	2e-137	Q94GG9	Q94GG9_ORYSJ Putative cytosolic tRNA-Ala synthetase OS=Oryza sativa subsp. japonica GN=OSJNBb0022I16.5 PE=4 SV=1	YOR335c
116	CL12256.Contig1_All	162 554 profilin-like protein [Solanum tuberosum] >CL12256.Contig2_All 104 496 minus strand profilin-like protein [Solanum tuberosum]	16667	MSWQSYVDDHLMCEIDGNHLTSAAIIGHDGVVWAQSANFPQFKAEEIGGIMDDFEEPGKLAPTGLHLGGTKYMVIQGEPGAVIRGKKGPGGITIKKTNLALLIGIYDEPMTPGQCNMVVERIGDYLIEQGL	880|637	29.8|29.8	-|-	36|30	36|7	3|3	3|2	1.118	1.055	25	5	-	-	1.189	0.989	16	5	-	-	0.613	0.809	24	4	*	-	0.688	0.711	15	4	*	-	CL12256.Contig1_All	86.26	5e-55	gi|77999277|gb|ABB16985.1|	profilin-like protein [Solanum tuberosum]	85.5	9e-55	sp|Q941H7|PROF_LITCN	Profilin OS=Litchi chinensis PE=1 SV=1	88.68	1e-39	A5H0M3	A5H0M3_NICBE Profilin (Fragment) OS=Nicotiana benthamiana PE=2 SV=1	-
117	CL4450.Contig1_All	157 573 actin depolymerizing factor 2 [Gossypium hirsutum]	20939	MANAASGMAVHDDCKLKFMELKAKRTHRFIVFKIEEKQKQVIVEKLGEPTETYEDFSANLPAEECRYAVYDFDFVTAENVPKSKIFFIAWSPDTAKVRSKMIYASSKDRFKRELDGIQVELQATDPTEMGLDVFKSRAN	47|89	8.6|8.6	2|2	2|4	2|4	1|1	1|1	---	0.906	1	4	-	-	---	0.678	1	4	-	*	---	1.056	1	4	-	-	---	0.701	1	4	-	-	CL4450.Contig1_All	92.09	1e-72	gi|89276303|gb|ABD66508.1|	actin depolymerizing factor 6 [Gossypium hirsutum]	87.77	5e-69	sp|Q9ZSK3|ADF4_ARATH	Actin-depolymerizing factor 4 OS=Arabidopsis thaliana GN=ADF4 PE=2 SV=2	92.09	7e-72	Q208T5	Q208T5_GOSHI Actin depolymerizing factor 2 OS=Gossypium hirsutum GN=ADF2 PE=2 SV=1	-
118	CL1800.Contig12_All	390 1334 hypothetical protein RCOM_0634810 [Ricinus communis] >gi|223541172|gb|EEF42728.1| hypothetical protein RCOM_0634810 [Ricinus communis]	40014	DDVKNQDDKESDVGEVSSPGSQDHTHQNLLTEEEEEEIEKDRNLTNLPSAEGLRIAGGEKHSVLEESVVQVERVFKFKDESDRKDGRVEHDEATRKSYDGGSSGSSSSSSSSSDNESHGIKNSQAAADIASVVDSVKLADSLSGRSAEAIHSVPIEEAGDSVVENIPAADSEKISVLREQVEVNMISPADISIAPYVVESVLKENGEKKLSSVGDKVGTSLTLVNAALEREEETIVQSVDNTATILGPKQCVTQENDDRLTLPYNAPRATADNGAEHEKDSGVTEPLLVPSPCPVQKTSWKSCCGLFEVFTGSGR	57|41	3.8|3.8	4|4	2|1	2|1	1|1	1|1	1.221	---	2	1	-	-	---	---	-	1	-	-	0.718	---	2	1	-	-	---	---	-	1	-	-	CL1800.Contig12_All	37.63	1e-13	gi|359483816|ref|XP_002271436.2|	PREDICTED: uncharacterized protein LOC100245309 [Vitis vinifera]	-	-	-	-	37.63	1e-12	F6HMG5	F6HMG5_VITVI Putative uncharacterized protein OS=Vitis vinifera GN=VIT_10s0003g02610 PE=4 SV=1	-
119	CL13597.Contig2_All	150 914 minus strand RecName: Full=ATP synthase subunit O, mitochondrial; AltName: Full=Oligomycin sensitivity conferral protein; Short=OSCP; Flags: Precursor >gi|168270|gb|AAA33388.1| F-1-ATPase delta subunit precursor (EC 3.6.1.3) [Ipomoea bat	34665	MAMAGRLRSGLPLFRRALTADSLSSSSTAAAAATDRSVAFRAVLFPDFTNPEFTRNYATSPPAKEQKVKVPVKMYGVSGNYASALYISAVKANALDKVESELLTLVEASKKSPTFSQFMKDVSVTADTRVKAINDICTQAKFSDITKNFLVVVAEFGRLGHLERMTQRFSELTMAHRGEVKATVTTVIPLPPEEEKELKETLQDILGQGKKVKVDQKIDPSILGGLVVEFEQKVFDMSIRTRARQMERFLRQPIN	-|89	-|10.6	-|-	-|2	-|2	-|2	-|2	-	0.642	-	2	-	-	-	0.491	-	2	-	-	-	1.758	-	2	-	-	-	0.545	-	2	-	-	CL13597.Contig2_All	73.68	5e-17	gi|57239891|gb|AAW49239.1|	oligomycin sensitivity conferring protein [Silene dioica]	72.35	4e-85	sp|P22778|ATPO_IPOBA	ATP synthase subunit O, mitochondrial OS=Ipomoea batatas PE=1 SV=1	72.53	1e-23	Q5S8F0	Q5S8F0_SILCU ATP synthase (Fragment) OS=Silene cucubalus GN=dd44A PE=3 SV=1	YDR298c
120	CL11494.Contig1_All	148 1257 minus strand PREDICTED: isocitrate dehydrogenase [NAD] catalytic subunit 5, mitochondrial-like [Vitis vinifera]	47898	MASQILRRLARGRASGFFSSANPSFLDRSFSSAASDSNLIRATLFPGDGIGPEIAESVKQVFKVAGVPIEWEEHFVGTEIDPRTQSFLTWESLESVRQNKVGLKGPMATPIGKGHRSLNLTLRKELNLYANVRPCYSLPGYKTKYDDVDLITIRENTEGEYSGLEHQVVRGVVESLKIITRQASLRVAEYAFHYAKTHGRERVSAIHKANIMQKTDGLFLKCCREVAEKYPEIIYEEVVIDNCCMMLVKNPSLFDVLVMPNLYGDIISDLCAGLIGGLGLTPSCNIGEGGIALAEAVHGSAPDIAGKNLANPTALLLSAVTMLRHLDLHDKADKIQDAVLKTIAEGKYRTGDLGGKSTTTDFTKAICDHL	294|313	14.1|18.6	1|1	9|9	8|8	3|4	2|3	0.948	0.98	8	7	-	-	0.825	0.602	8	6	-	-	1.1	1.307	8	7	-	-	0.985	0.762	8	6	-	-	CL11494.Contig1_All	96.88	4e-127	gi|308171622|gb|ADO16105.1|	isopropylmalate dehydrogenase [Ipomoea pes-tigridis]	89.63	0	sp|P29696|LEU3_SOLTU	3-isopropylmalate dehydrogenase, chloroplastic OS=Solanum tuberosum PE=2 SV=1	96.88	4e-126	E2JAU9	E2JAU9_9ASTE Isopropylmalate dehydrogenase (Fragment) OS=Ipomoea pes-tigridis GN=IMDH PE=2 SV=1	SPBC902.05c
121	CL8381.Contig2_All	787 1746 cytochrome f protein [Antirrhinum majus]	42579	MQTRNTFSWIKEQITRSISVSLMIYIITRTSISSAYPIFAQQGYENPREATGRIVCANCHLANKPVDIEVPQAVLPDTVFEAVVRIPYDKQVKQVLANGKKGGLNVGAVLILPEGFELAPSDRISPEMKEKIGNLSFQSYRPNKKNILVIGPVPGQKYSEITFPILSPDPATKKDVHFLKYPIYVGGNRGRGQIYPDGSKSNNTVYNATGAGIVSKIIRKEKGGYEITITDPSDGRQVVDIIPPGPELLVSEGESIKLDQPLTSNPNVGGFGQGDAEIVLQDPLRVQGLLFFLASVILAQIFLVLKKKQFEKVQLAEMNF	1577|1692	36.9|37.2	-|-	63|58	63|58	8|9	8|9	0.712	0.819	45	46	-	-	0.868	0.959	37	39	-	-	1.141	1.1	43	43	-	-	0.721	0.821	37	38	-	-	CL8381.Contig2_All	98.75	0	gi|290489082|gb|ADD30925.1|	cytochrome f protein [Antirrhinum majus]	96.25	1e-179	sp|Q8S8W4|CYF_ATRBE	Apocytochrome f OS=Atropa belladonna GN=petA PE=3 SV=1	98.75	0	D3WAK4	D3WAK4_ANTMA Apocytochrome f OS=Antirrhinum majus GN=petA PE=3 SV=1	-
122	CL7225.Contig1_All	283 549 predicted protein [Populus trichocarpa] >gi|118483473|gb|ABK93635.1| unknown [Populus trichocarpa] >gi|118483822|gb|ABK93803.1| unknown [Populus trichocarpa] >gi|222873134|gb|EEF10265.1| predicted protein [Populus trichocarpa]	13543	QEEAVKKKYGGIMPKKPPLISKDHERAYFDSADWALGKQGVEKPKGPLEALRPKLQPTQQQTRYRKSPYAPSEGEDGTTAPSEDATTNE	22|22	27.0|27.0	1|1	1|1	1|1	1|1	1|1	---	---	1	1	-	-	---	---	1	-	-	-	---	---	-	1	-	-	---	---	-	-	-	-	CL7225.Contig1_All	94.67	2e-35	gi|147860363|emb|CAN80447.1|	hypothetical protein VITISV_013098 [Vitis vinifera]	-	-	-	-	94.67	2e-34	A5ATI8	A5ATI8_VITVI Putative uncharacterized protein OS=Vitis vinifera GN=VITISV_013098 PE=4 SV=1	-
123	CL804.Contig25_All	177 1940 plastidic glucose 6-phosphate dehydrogenase [Nicotiana tabacum]	78708	SSSNHCCSSSAAYSNSSSIGFHQLHGNIPFSVISQKRLGSRNVSLQSKCSPLSNVILMQDGALAAKMASTNEAPPMNLKEGLLSVTLPEEHEKPIDSVINDYKSTVSIAVVGASGDLAKKKIFPALFALYYEDCLPEHFTIFGYARSKMTDAELRNMVSKTLTCRIDKRENCAEKMEQFLKRCFYHSGQYDSQENFVELDKKLREHEAGRVSNRLFYLSIPPNIFVDAVKCASLSASASVGWTRVIVEKPFGRDSESSAALTKALKQYLEEDQIFRIDHYLGKELVENLSVLRFSNLIFEPLWSRQYIRNVQLIFSEDFGTEGRGGYFDHYGIIRDIMQNHLLQILALFAMETPVSLDAEDIRNEKVKVLRSMRPLGVDDVVIGQYKSHTKGGVAYPGY…	-|19	-|1.7	-|7	-|1	-|1	-|1	-|1	-	---	-	-	-	-	-	---	-	-	-	-	-	---	-	-	-	-	-	---	-	-	-	-	CL804.Contig25_All	97.75	2e-44	gi|380863002|gb|AFF18794.1|	chloroplast glucose-6-phosphate dehydrogenase, partial [Dimocarpus longan]	85.58	0	sp|Q9FY99|G6PD2_ARATH	Glucose-6-phosphate 1-dehydrogenase 2, chloroplastic OS=Arabidopsis thaliana GN=At5g13110 PE=2 SV=2	93.36	1e-127	B2BFH0	B2BFH0_SCUBA Glucose-6-phosphate 1-dehydrogenase (Fragment) OS=Scutellaria baicalensis GN=G6PDH PE=2 SV=1	YNL241c
124	CL2199.Contig3_All	145 1245 minus strand PREDICTED: uncharacterized protein LOC100252479 [Vitis vinifera]	46391	MGSFPVLSVLLCVATCHLAFAFRDGLLDNGNFEQAPKSSDLNGTVVLKPNAIPKWQISGFVEYIKAGQKQGDMLLVVPEGYAAVRLGNEASVKQLINVTKGMYYSLTFSAARTCAQEERVNVSVAPDYGVLPIQTLYSSSGWDSYAWAFRASYSVAEILIHNPGVEEDPACGPLIDSIAIRALYPPKPTSENLLKNGDYEEGAYILPNTSWGVLIPPNIEDDNSPLPAWMVESLKAVKYIDAAHFSVPHGQRAIELVGGKESAIAQVARTIAGKTYQLTFAVGDASNSCEGSMIVEAFAGRDTVKVPYESKGKGGYKRAVLRFVAPTTRTRIMFLSTYYHMRSDDYASLCGPVVDDVKLLSVRKPRR	404|332	14.4|13.4	-|-	17|14	4|14	4|4	3|4	---	1.342	1	9	-	-	1.034	1.225	2	8	-	-	---	0.897	1	9	-	-	1.67	1.289	2	7	-	*	CL2199.Contig3_All	81.36	6e-175	gi|460399325|ref|XP_004245192.1|	PREDICTED: uncharacterized protein LOC101262737 [Solanum lycopersicum]	-	-	-	-	81.34	3e-60	B9PA50	B9PA50_POPTR Predicted protein OS=Populus trichocarpa GN=POPTRDRAFT_794276 PE=4 SV=1	-
125	CL13540.Contig1_All	219 1397 RecName: Full=Eukaryotic initiation factor 4A-3; Short=eIF-4A-3; AltName: Full=ATP-dependent RNA helicase eIF4A-3 >gi|19699|emb|CAA43514.1| nicotiana eukaryotic translation initiation factor 4A [Nicotiana plumbaginifolia]	51760	MEEDDAKLVFETSQGVEPIMSFDEMGIKDDLLRGIYNYGFEKPSAIQQRAVLPIISGRDVIAQAQSGTGKTSMIALAVCQIVDTKSSEVQALILSPTRELAAQTERVILAIGDYINVQAHACIGGKSVGEDIRKLEHGVHVVSGTPGRVCDMIKRRTLRTRSIKLLVLDESDEMLSRGFKDQIYDVYRYLPPELQVVLISATLPNEILEITSKFMTDPVRILVKRDELTLEGIKQFFVAVEKEEWKFDTLCDLYDTLTITQAVIFCNTKRKVDWLTAKMRENNFTVSSMHGDMPQKERDAIMGEFRSGQTRVLITTDVWARGLDVQQVSLVINYDLPNNRELYIHRIGRSGRFGRKGVAINFVKSDDIKILRDIEQYYSTQIDEMPMNVADLI	42|46	4.8|5.9	1|1	3|2	1|1	3|2	1|1	---	---	1	-	-	-	---	---	-	-	-	-	---	---	1	-	-	-	---	---	-	-	-	-	CL13540.Contig1_All	95.67	0	gi|1170507|sp|P41380.1|IF4A3_NICPL	RecName: Full=Eukaryotic initiation factor 4A-3; Short=eIF-4A-3; AltName: Full=ATP-dependent RNA helicase eIF4A-3 >gi|19699|emb|CAA43514.1| nicotiana eukaryotic translation initiation factor 4A [Nicotiana plumbaginifolia]	95.67	0	sp|P41380|IF4A3_NICPL	Eukaryotic initiation factor 4A-3 OS=Nicotiana plumbaginifolia PE=2 SV=1	94.64	0	F8RWS6	F8RWS6_HEVBR DEAD box RNA helicase RH2a (Fragment) OS=Hevea brasiliensis PE=2 SV=1	SPAC1F5.10
126	CL10958.Contig3_All	120 551 minus strand Photosystem I reaction center subunit VI, chloroplast precursor, putative [Ricinus communis] >gi|223544930|gb|EEF46445.1| Photosystem I reaction center subunit VI, chloroplast precursor, putative [Ricinus communis]	18788	MASLATFAAAQPTAVKGLAGSSLAGTKLHVKPSRVSFRPTNYRAGAVVAKYGDKSVYFDLEDIGNTTGQWDLYGSDAPSPYNPLQSKFFETFAAPFTKRGLLLKFLILGGGATLAYVSSQATGDVLPIVKGPQLPPKPGPRGKI	77|65	7.6|7.6	-|-	4|3	4|3	1|1	1|1	1.037	1.686	3	3	-	*	1.258	1.679	2	3	-	-	0.658	0.591	3	3	-	-	0.955	1.452	2	3	-	-	CL10958.Contig3_All	94.44	3e-13	gi|131198|sp|P20121.1|PSAH_PEA	RecName: Full=Photosystem I reaction center subunit VI; AltName: Full=Light-harvesting complex I 11 kDa protein; AltName: Full=PSI-H	94.44	1e-13	sp|P20121|PSAH_PEA	Photosystem I reaction center subunit VI (Fragment) OS=Pisum sativum GN=PSAH PE=1 SV=1	90.1	3e-37	Q40432	Q40432_NICSY PSI-H (Precursor) OS=Nicotiana sylvestris PE=4 SV=1	-
127	Unigene49395_All	97 348 minus strand succinyl CoA ligase beta subunit-like protein [Solanum tuberosum]	11477	MVRGLLGKLAGRSVSVAGKWQQQQLRRLNIHEYQGAELMSKHGINVPKGVAVGSVDEVKKALRDVFPNQSEAVVKSQILAGGRG	30|33	14.3|14.3	-|-	1|1	1|1	1|1	1|1	---	---	1	1	-	-	---	---	-	1	-	-	---	---	1	1	-	-	---	---	-	1	-	-	Unigene49395_All	85	4e-34	gi|350537431|ref|NP_001234293.1|	succinyl-CoA ligase [ADP-forming] subunit beta, mitochondrial [Solanum lycopersicum] >gi|75147005|sp|Q84LB6.1|SUCB_SOLLC RecName: Full=Succinyl-CoA ligase [ADP-forming] subunit beta, mitochondrial; Short=SlSCoALbeta; Flags: Precursor >gi|27803873|gb|AAO22150.1| succinyl CoA ligase beta subunit [Solanum lycopersicum]	85	1e-34	sp|Q84LB6|SUCB_SOLLC	Succinyl-CoA ligase [ADP-forming] subunit beta, mitochondrial OS=Solanum lycopersicum PE=1 SV=1	84.52	1e-34	Q2PYW7	Q2PYW7_SOLTU Succinyl CoA ligase beta subunit-like protein OS=Solanum tuberosum PE=2 SV=1	BH2470
128	CL7806.Contig1_All	419 2161 minus strand unnamed protein product [Vitis vinifera]	74533	LCLLVWFTTVLTFCQGKQDDHPAQYRYPFIKPASSFSAQPSSAAWIGASSSYDYIIVGGGTAGCPLAATLSRNYTVLLLERGGTPFANANVSFMQNFHISLADISPTSASQMFISTDGVFNSRARVLGGGTSINAGFYTRASASYIKRIGWDAKLVNESYPWIEKQIVHRPDLVPWQRAVRDSLVEVGISPFNGFTYDHMYGTKVGGTIFDRFGRRHTAAELLASANPEKLHVLVHATVQKIEFDTTGKRPRAVGVIFKDENGKTHKAILSKRSVSEIIVSSGAIGSPHLLVLSGIGPKAELEKFNISVVLDNEFVGKGMSDNPLNTIFVPSKTPVKQSLIQTVGITKLGVYIEASSGFGQSSDSIHWDHGIASAEIGQLSTIPPKHRTHEAIHDYRRR…	-|51	-|3.8	-|-	-|3	-|1	-|2	-|1	-	---	-	1	-	-	-	---	-	-	-	-	-	---	-	1	-	-	-	---	-	-	-	-	CL7806.Contig1_All	84.42	9e-34	gi|62319359|dbj|BAD94653.1|	hypothetical protein [Arabidopsis thaliana]	68.82	0	sp|Q9S746|HTH_ARATH	Protein HOTHEAD OS=Arabidopsis thaliana GN=HTH PE=1 SV=1	84.42	1e-32	Q56ZG3	Q56ZG3_ARATH Putative uncharacterized protein At1g72970 OS=Arabidopsis thaliana GN=At1g72970 PE=4 SV=1	mll1008
129	Unigene2147_All	197 1075 minus strand PREDICTED: 31 kDa ribonucleoprotein, chloroplastic-like [Vitis vinifera]	36174	CATTVPRTHFTTSISRPSCPSLSIRQIQFSPSSISLKPKILPFKIVPFVAQTSDWAQQEEEEEEKNGIEYESDEGIEANATDSFAWEGKEENVDSDGGSLEEGDGVDSYSEPPEEAKLFVGNLPYDVDSEKLAQLFDQAGVVEISEVIYNRQTDQSRGFGFVTMSTVEEAEKAVEMFNRYDINGRLLTVNKAAPRGSQPERIPRVYEPSFRMYVGNLPWQVDNARLEQVFSEHGKVVDARVVYDRETGRSRGFGFVTMSSETELNDAIAALDGQDLDGRAIRVNVAEERPRRG	2081|2381	38.6|29.0	-|-	86|74	59|49	7|6	6|5	1.25	1.085	39	40	-	-	0.923	0.896	36	38	-	-	1.167	1.228	38	40	*	-	1.465	1.07	37	38	*	-	Unigene2147_All	84.62	3e-88	gi|162463757|ref|NP_001105347.1|	nucleic acid binding protein1 [Zea mays] >gi|168526|gb|AAA33486.1| nucleic acid-binding protein [Zea mays] >gi|195637380|gb|ACG38158.1| ribonucleoprotein [Zea mays] >gi|414884557|tpg|DAA60571.1| TPA: nucleic acid binding protein1 [Zea mays]	82.49	2e-83	sp|P19683|ROC4_NICSY	31 kDa ribonucleoprotein, chloroplastic OS=Nicotiana sylvestris PE=1 SV=1	84.62	3e-87	Q41834	Q41834_MAIZE Nucleic acid-binding protein (Precursor) OS=Zea mays GN=NBP PE=2 SV=1	SPAC140.02
130	Unigene23005_All	6 395 minus strand PREDICTED: EPIDERMAL PATTERNING FACTOR-like protein 4 [Vitis vinifera] >gi|297745777|emb|CBI15833.3| unnamed protein product [Vitis vinifera]	18614	FKHWKRLHFCAVICFFCCFCLCIHGIYTANSKPNSPSETKCMLSLKADNYFQNLERNKIWEIANIVRGSTGGARRLLGGPGSSPPRCASKCGGCTPCKPVHVLVPPGTRVTTEYYPEAWRCKCGNKLYMP	30|35	12.3|12.3	-|-	5|4	5|4	1|1	1|1	---	---	1	-	-	-	---	---	1	-	-	-	---	---	1	-	-	-	---	---	1	-	-	-	Unigene23005_All	87.93	2e-23	gi|255553321|ref|XP_002517702.1|	conserved hypothetical protein [Ricinus communis] >gi|223543100|gb|EEF44634.1| conserved hypothetical protein [Ricinus communis]	78.12	6e-23	sp|Q1PEY6|EPFL6_ARATH	EPIDERMAL PATTERNING FACTOR-like protein 6 OS=Arabidopsis thaliana GN=EPFL6 PE=2 SV=1	87.93	2e-22	B9RVD3	B9RVD3_RICCO Putative uncharacterized protein (Fragment) OS=Ricinus communis GN=RCOM_1132650 PE=4 SV=1	-
131	CL623.Contig3_All	81 494 unknown [Lotus japonicus]	18907	MSSTAAASTKGGRGKPKSSKSVSRSSKAGLQFPVGRIARFLKAGKYAERVGAGAPVYLSAVLEYLAAEVLELAGNAARDNKKTRIIPRHVQLAIRNDDELGKLLQGVTIASGGVLPNINPVLLPKKSAGSEDKGSQAK	-|160	-|23.2	-|3	-|9	-|2	-|2	-|1	-	0.721	-	2	-	-	-	0.916	-	2	-	-	-	2.218	-	2	-	-	-	1.443	-	2	-	-	CL623.Contig3_All	88.42	4e-32	gi|224123096|ref|XP_002318994.1|	histone 2 [Populus trichocarpa] >gi|222857370|gb|EEE94917.1| histone 2 [Populus trichocarpa]	87.63	3e-32	sp|Q9S9K7|H2AXB_ARATH	Probable histone H2AXb OS=Arabidopsis thaliana GN=At1g54690 PE=1 SV=1	88.42	5e-31	B9I7J5	B9I7J5_POPTR Histone H2A (Fragment) OS=Populus trichocarpa GN=HTA913 PE=3 SV=1	YBL003c
132	CL8438.Contig1_All	8 688 PREDICTED: deoxyuridine 5&apos;-triphosphate nucleotidohydrolase-like [Vitis vinifera]	28737	MAGILGAIFRNPIFPGFFPPFNPHFGFNSSPICKFPRNPSRKISYLALVMAQAAEKPNHSPEIEEPSPKIQKTHQNGVAEIKTHETTPFLRVKRLSEKAILPSRASPLSAGYDLSSAAETKVPARGKALIPTDLSIAVPEGTYARIAPRSGLAWKHSIDVGAGVVDADYRGPVGVILFNYSDVDFEVKPGDRIAQLIIEKIVTPEVTEVDDLDSTDRGSGGFGSTGV	555|882	26.4|33.0	-|-	25|22	25|22	4|5	4|5	0.859	1.002	13	17	-	-	0.59	0.771	7	13	-	-	1.396	1.485	12	17	-	-	0.409	1.061	8	13	-	-	CL8438.Contig1_All	82.14	1e-60	gi|294464148|gb|ADE77591.1|	unknown [Picea sitchensis]	78.79	9e-70	sp|Q9STG6|DUT_ARATH	Deoxyuridine 5'-triphosphate nucleotidohydrolase OS=Arabidopsis thaliana GN=DUT PE=1 SV=1	82.14	1e-59	D5ADH2	D5ADH2_PICSI Putative uncharacterized protein OS=Picea sitchensis PE=2 SV=1	SPAC644.05c
133	Unigene34788_All	145 1218 PREDICTED: probable plastid-lipid-associated protein 3, chloroplastic-like [Vitis vinifera]	44642	MSLILSPHPSSALLSLKYPKFSPKSTKTPSLSFSPNPRFIFSIRSSYSFNDPTDPPSKPDASSEAGSEKPAFVDEWGEKSEPEPEPTSKFSGPDPPKDEDEWGGSGVELGNGSPVATGGVNVSVQEEDGGGKLWELKRALVDTVYGSDFGFRASAEVRAEALELVSQLEAANPTPAPTESPELLDGNWVLVYTAFSELLPLLAAGSIPLVKVEKIGQSIDTGSLTIENSTTLSTPVSTLSFSASASFEVRSPSRIQVEFKEGTFKPPEIKSSIDLPESLNIFGQNINLSSVQQSLSPLQNAVEGIARTISGQPPLKIPIPGERTKSWLLVTYLDKDLRISRGDGGLFVLVKEGSPLLD	392|158	6.7|9.5	-|-	16|7	16|7	2|3	2|3	0.934	0.94	13	5	-	-	1.1	1.094	9	4	-	-	1.177	0.637	12	5	-	*	0.911	0.643	8	4	-	-	Unigene34788_All	81.94	1e-86	gi|86450874|gb|ABC96720.1|	plastid fibrillin 2 [Coffea canephora]	63.55	2e-83	sp|Q9ZP40|PG1_PEA	Plastoglobulin-1, chloroplastic OS=Pisum sativum GN=PG1 PE=1 SV=1	81.94	1e-85	A6XBI6	A6XBI6_COFCA Plastid fibrillin 2 (Fragment) OS=Coffea canephora GN=FIB2 PE=2 SV=1	-
134	CL41.Contig11_All	176 1060 PREDICTED: pre-mRNA-splicing factor SF2-like isoform 1 [Vitis vinifera] >gi|359480272|ref|XP_003632425.1| PREDICTED: pre-mRNA-splicing factor SF2-like isoform 2 [Vitis vinifera]	35689	RSSRTIYVGNLPGDIRESEVEDLFYKYGPIVDIDLKIPPRPPGYAFVEFEDSRDADDAIRGRDGYNFDGCRLRVELAHGGRGSSSYDRHSSYSSGSSRGGVSRRSDYRVLVTGLPSSASWQDLKDHMRRAGDVCFSQVYRDRDGMRGIVDYTNYDDMKYAIRKLDDSLFRNQYSRAYVRVEEYERRRSYSRSPSRSPYSRSRSTTRSPGDRGRSRSVSPRVKRSRHASSRSRSRSAASRSESESPPRAVSRSRSRSRPPTASPPPQLRHASASPSRSRSSSSSRSRSRSRSRSVS	-|46	-|7.5	-|5	-|2	-|1	-|2	-|1	-	---	-	1	-	-	-	---	-	1	-	-	-	---	-	1	-	-	-	---	-	1	-	-	CL41.Contig11_All	86.21	1e-53	gi|356574963|ref|XP_003555612.1|	PREDICTED: pre-mRNA-splicing factor SF2-like [Glycine max]	69.78	9e-50	sp|O22315|SRSF1_ARATH	Pre-mRNA-splicing factor SF2 OS=Arabidopsis thaliana GN=SF2 PE=1 SV=1	86.21	1e-52	I1NJ20	I1NJ20_SOYBN Uncharacterized protein OS=Glycine max PE=4 SV=1	SPAC16.02c
135	Unigene9440_All	64 1101 A/G-specific adenine glycosylase muty, putative [Ricinus communis] >gi|223536123|gb|EEF37778.1| A/G-specific adenine glycosylase muty, putative [Ricinus communis]	43398	PTSTISSSTINFSTGISYHIFSVNYNKFSHLLENHTTHLAFSPSLYHFSMATDSKEIALDLSPFFRLFSDGSIDRIRPPQFLPPSDDPNSAVRSKDVVIDPETGVSVRIFAPRQQNPPRKLPLVVYIHGGAFCVGSASNPVFHNFVANLVEKANVIAVSVDYRLAPENPLPIPFDDSWAAFQWVAAHADSKGPEPWLNDHADFRRVFVGGESAGANIANDVAIRAGVHKFRGVEIVGLFLVHPFFGGKEEDRLYKYLCPTSSGRDDDPRLNPAVDPRIRQMVGRRVIFFVAEKDFLRDKGRAYYEGLKKSEWRGEVEIMETEGEGHCFYLFNLSSEKAVAIVDRLV	16|-	1.4|-	-|-	1|-	1|-	1|-	1|-	---	-	-	-	-	-	---	-	-	-	-	-	---	-	-	-	-	-	---	-	-	-	-	-	Unigene9440_All	60.2	2e-107	gi|460369931|ref|XP_004230810.1|	PREDICTED: probable carboxylesterase 13-like [Solanum lycopersicum]	43	1e-62	sp|Q9LMA7|CXE1_ARATH	Probable carboxylesterase 1 OS=Arabidopsis thaliana GN=CXE1 PE=2 SV=1	55.22	8e-90	F6HQD8	F6HQD8_VITVI Putative uncharacterized protein OS=Vitis vinifera GN=VIT_03s0063g00830 PE=4 SV=1	lin2194
136	CL1114.Contig2_All	122 724 minus strand PREDICTED: psbP domain-containing protein 3, chloroplastic [Vitis vinifera] >gi|297745601|emb|CBI40766.3| unnamed protein product [Vitis vinifera]	25443	KRNKNSSFICCKNNGVEQQNPCVRVREECGTRRRELLFQAVSAAFAFPAFTSVALAAESDLPEDFRVYTDEVNKFKITIPQDWQVGTGEGDGVRSLIAFYPPEASSSNVSIVITGLGADFTRLESFGKVDAFAENLVGGLDRSWQRPPGVAAKLIDSKAANGLYYIEYTLKNPGESRRHLFSVLGIANNGFYNRLYTLTGQ	315|-	19.4|-	-|-	11|-	11|-	3|-	3|-	2.99	-	10	-	*	-	1.133	-	8	-	-	-	0.758	-	9	-	-	-	1.98	-	9	-	*	-	CL1114.Contig2_All	76.16	3e-71	gi|224083366|ref|XP_002306998.1|	predicted protein [Populus trichocarpa] >gi|222856447|gb|EEE93994.1| predicted protein [Populus trichocarpa]	59.69	1e-65	sp|Q9S720|PPD3_ARATH	PsbP domain-containing protein 3, chloroplastic OS=Arabidopsis thaliana GN=PPD3 PE=1 SV=2	76.16	3e-70	B9H5W3	B9H5W3_POPTR Predicted protein (Fragment) OS=Populus trichocarpa GN=POPTRDRAFT_206841 PE=4 SV=1	-
137	Unigene8865_All	105 380 minus strand transcription regulator, putative [Ricinus communis] >gi|223538571|gb|EEF40175.1| transcription regulator, putative [Ricinus communis]	13286	MAVTKEQVESTLKSKLNPSHLDVIDTSGGCGASYTIEIVSEQFEGKRLLERHRMVNAALVEEMKQIHALSITKALTPEQWKQQEAKKSQAAA	26|-	12.0|-	-|-	1|-	1|-	1|-	1|-	---	-	-	-	-	-	---	-	-	-	-	-	---	-	-	-	-	-	---	-	-	-	-	-	Unigene8865_All	89.47	2e-23	gi|147773413|emb|CAN60268.1|	hypothetical protein VITISV_029393 [Vitis vinifera]	48.48	4e-10	sp|Q53S33|BOLA3_HUMAN	BolA-like protein 3 OS=Homo sapiens GN=BOLA3 PE=1 SV=1	89.47	3e-22	A5AII4	A5AII4_VITVI Putative uncharacterized protein OS=Vitis vinifera GN=VITISV_029393 PE=3 SV=1	SPAC8C9.11
138	CL4233.Contig1_All	212 2404 minus strand putative long-chain acyl-CoA synthetase [Capsicum annuum] >CL4233.Contig2_All 216 2408 minus strand putative long-chain acyl-CoA synthetase [Capsicum annuum]	98446	MGEPEGSNLDTNTMKNIGNSDYLSIIKDNGIYGIVCAVIVAIVIPILLSVVLRGKRKLKQRGVPVEVGGETGLAMRNARSLKLVEVPWEGATTMAALFEQSCKRHSQEKFLGTRKVIGKDFVTASDGRKFEKLHLGEYQWETYQQIFDRACNFASGLLKLGHDVDTRAAIFSETRAEWLIAFQACFRQNITVVTIYASLGDDALIHSLNETQVSTLICDSKQLKKLAAISSSLPTIRHIIYFDDEDSPNGSSVTQEISNWKVSSFAEVEKLGSNNPAPPNLPIKKDIAVIMYTSGSTGLPKGVMMTHGNIVATAAAVMTVIPRIGSRDLYLAYLPLAHVFELAAETVMLTAGAAIGYGSALTLTDTSNKIKKGTKGDASMLKPTLMAAVPAILDRVREG…	-|45	-|2.1	-|-	-|1	-|1	-|1	-|1	-	---	-	1	-	-	-	---	-	-	-	-	-	---	-	1	-	-	-	---	-	-	-	-	CL4233.Contig1_All	79.35	0	gi|225447498|ref|XP_002267417.1|	PREDICTED: long chain acyl-CoA synthetase 8 [Vitis vinifera] >gi|296085053|emb|CBI28468.3| unnamed protein product [Vitis vinifera]	73.41	0	sp|Q9SJD4|LACS8_ARATH	Long chain acyl-CoA synthetase 8 OS=Arabidopsis thaliana GN=LACS8 PE=2 SV=1	79.35	0	D7TD95	D7TD95_VITVI Putative uncharacterized protein OS=Vitis vinifera GN=VIT_12s0057g01270 PE=4 SV=1	SPBC18H10.02
139	CL14234.Contig19_All	1 392 LEN=392; translated	16648	XFQESLSLEKPEIPRALFFKLGCASALISELTNALTLRALQSAGLEERAKATQVCTSNFLVIFCFTEVDQISISLVPVGFFKTLFSTYQFNIXGLARWISIEYYFKAVIESVPNASGNCTSLHHXRGLDSAX	19|-	4.5|-	-|-	1|-	1|-	1|-	1|-	---	-	-	-	-	-	---	-	-	-	-	-	---	-	-	-	-	-	---	-	-	-	-	-	CL14234.Contig19_All	-	-	-	-	-	-	-	-	-	-	-	-	-
140	CL196.Contig20_All	2826 3293 predicted protein [Populus trichocarpa] >gi|222869077|gb|EEF06208.1| predicted protein [Populus trichocarpa]	19216	GTMTFGEQNTLAQSFQLLDKAFDSGINFFDSAEMYPVPQRAETQGRSEEYLGRWIRSRNIPRDRVVLATKVSGPSGQMTWIRNGPENLDARNIADALDNSLLRLQSDYIDLYQVHWPDRYVPMFGETEYDQTQTFASVSFEEQLAALDKAITAGKV	18|-	7.7|-	1|-	1|-	1|-	1|-	1|-	---	-	-	-	-	-	---	-	-	-	-	-	---	-	-	-	-	-	---	-	-	-	-	-	CL196.Contig20_All	78.85	1e-73	gi|460404010|ref|XP_004247478.1|	PREDICTED: protein tas-like [Solanum lycopersicum]	48.08	8e-34	sp|P0A9T5|TAS_SHIFL	Protein tas OS=Shigella flexneri GN=tas PE=3 SV=1	78.21	2e-71	B9IE88	B9IE88_POPTR Predicted protein OS=Populus trichocarpa GN=POPTRDRAFT_666263 PE=4 SV=1	VC0667
141	CL8101.Contig4_All	491 1687 PREDICTED: NADH dehydrogenase [ubiquinone] 1 alpha subcomplex subunit 9, mitochondrial [Vitis vinifera] >gi|297744229|emb|CBI37199.3| unnamed protein product [Vitis vinifera] >CL8101.Contig5_All 821 2017 PREDICTED: NADH dehydrogenase	51860	MQTVCRRLGHQYIKQSPAPISSFKSVYPLPDQYYGAENPRLASTLVTKGVGHLVRKGTGGRSSVSGIIATVFGATGFLGRYLVQRLAKMGSQVLVPFRGSEDSHRHLKLMGDLGQIVPMNYNPRDENSIKAVMAKANVVINLIGREYETRNYSFEEVNHHMAEQLAVIAKEHGGIMRYIQVSCLGASPSSPSRMLRTKAAAEEAILRELPEATVMRPAVMIGTEDRILNPWALFAKKYSFLPLIGDGSTKIQPVYVVDVASAIIAALKDDGTSMGKVYELGGPEIYTMHQLAELMYDTIREWPHYVKIPFPIAKAIATPREILLKKVPFPMPTPTIFNLDLIEALSTDTVVSENALTFEDLGIVPRKLKGYPIEYLIQYRKGGPQYGSTVSEKVSPKSW	26|53	4.3|4.3	-|-	3|3	3|3	2|2	2|2	---	1.416	-	3	-	-	---	0.623	-	3	-	-	---	1.475	-	3	-	-	---	1.15	-	3	-	-	CL8101.Contig4_All	83.46	0	gi|225437963|ref|XP_002271401.1|	PREDICTED: NADH dehydrogenase [ubiquinone] 1 alpha subcomplex subunit 9, mitochondrial [Vitis vinifera] >gi|297744229|emb|CBI37199.3| unnamed protein product [Vitis vinifera]	79.17	7e-169	sp|Q9SK66|NDUA9_ARATH	NADH dehydrogenase [ubiquinone] 1 alpha subcomplex subunit 9, mitochondrial OS=Arabidopsis thaliana GN=At2g20360 PE=2 SV=2	83.46	0	D7U382	D7U382_VITVI Putative uncharacterized protein OS=Vitis vinifera GN=VIT_07s0005g04440 PE=4 SV=1	AGc511
142	CL2054.Contig1_All	338 952 minus strand CBS domain-containing protein [Solenostemon scutellarioides]	26218	MQGGIQAIFSHGNVLKNAVLHHMRVVPPAMRSLMFARHESTSAAHIEEHGFESTTISDVLTAKGKSADGSWLWCTTEDTVYDAVKSMTQHNVGALVVVKPGEQKSIAGIITERDYLRKIIVQGRSSKSTNVGDIMTEENKLITVTPDTKVLKAMQLMTDNRIRHIPVINEGGMMGMVSIGDVVRAVVSEHRDELNRLNAFIQGGY	71|97	8.8|15.1	-|-	5|6	3|5	2|3	1|2	2.242	3.109	2	5	-	*	0.889	0.989	2	4	*	-	0.489	0.453	2	5	-	*	0.952	1.293	2	4	-	-	CL2054.Contig1_All	90.73	6e-106	gi|118162023|gb|ABK64186.1|	CBS domain-containing protein [Solenostemon scutellarioides]	78.64	7e-92	sp|Q9LEV3|CBSX3_ARATH	CBS domain-containing protein CBSX3, mitochondrial OS=Arabidopsis thaliana GN=CBSX3 PE=1 SV=1	90.73	6e-105	A0T1V6	A0T1V6_SOLSC CBS domain-containing protein OS=Solenostemon scutellarioides PE=2 SV=1	PA0250
143	CL13607.Contig1_All	113 1693 minus strand predicted protein [Populus trichocarpa] >gi|222868648|gb|EEF05779.1| predicted protein [Populus trichocarpa] >CL13607.Contig3_All 40 1620 minus strand predicted protein [Populus trichocarpa] >gi|222868648|gb|EEF05779.1|	68726	ISATKPPKFNFUISRRNPMSQEDRAMEAINHALKALKKRHLLEEGAHSPAFIALSRPIVSQGSEWKEKAENLEVELQQCYKAQSRLSEQLVVEVAESRASKALVQEKESMISELQNELSQAREECSHLAVLLEEKTKALELLINEHQELKGQLEATTLRADNAEAENKMLIDRWMLEKMKDAERLNEANAIYEDMLDRLKGSSIQLLARQQVDGVVRQSEEGAEYYVESTIPTTCKQRIPAHEGGCASVSFEYNSGKLVSGGQDKAVKMWDTNTGLLSRTLYGCLGSVLDVCITHDSKSVIAASSANNLYVWDVSSGRVRHTLTGHMDKVCAVDVSKVSNRNVVSAAYDRTIKVWDLQKGYCVNTLIFHSNCNALCFSMDGLTICSGHVDGNLRLWDIQ…	16|-	2.3|-	-|-	1|-	1|-	1|-	1|-	---	-	-	-	-	-	---	-	-	-	-	-	---	-	-	-	-	-	---	-	-	-	-	-	CL13607.Contig1_All	79.37	0	gi|460381117|ref|XP_004236299.1|	PREDICTED: protein tipD-like [Solanum lycopersicum]	36.26	7e-06	sp|Q5RFF8|NLE1_PONAB	Notchless protein homolog 1 OS=Pongo abelii GN=NLE1 PE=2 SV=3	76.85	0	B9IF20	B9IF20_POPTR Predicted protein OS=Populus trichocarpa GN=POPTRDRAFT_575266 PE=4 SV=1	all0438_2
144	CL9449.Contig1_All	85 1161 unnamed protein product [Vitis vinifera]	46891	RTLKDHLITCSGIFIACVLAVALQVFFFSPSPGALEISPPSSILPALSNGKLQEVIKLGEGLLKQPEDVAIDKLGVVYTATRDGCIKRLHKNGTWENWWQIDSDGLLGLTTTAAGDLIVCDAEKGLLKVGEEGVTVLASHVNGVKIRFADDVIESSDGMLYFSIASTKFGLHNWQLDVLEAKPHGQLLKYDPSLNVTSVLLDDLGFANGVALSAHQDYLVVCETWKYRCLKYWLEGDFKGQTEIFIDNLPGCPDNINLAPDGSFWIALLELIPSRLRFPYTSRASKYLIGAFPKLGNWVIGVDKKAMVVNVGSDGKIIRGFDDPTGKVMAFVTSALEFEGHLYLGSLHTDFLGKLPLTT	28|-	2.2|-	1|-	1|-	1|-	1|-	1|-	---	-	-	-	-	-	---	-	-	-	-	-	---	-	-	-	-	-	---	-	-	-	-	-	CL9449.Contig1_All	71.96	2e-104	gi|118489288|gb|ABK96449.1|	unknown [Populus trichocarpa x Populus deltoides]	35	4e-14	sp|P18417|STSY_CATRO	Strictosidine synthase OS=Catharanthus roseus GN=STR1 PE=1 SV=2	71.96	2e-103	A9PJ96	A9PJ96_9ROSI Putative uncharacterized protein OS=Populus trichocarpa x Populus deltoides PE=2 SV=1	PA1293
145	Unigene27577_All	114 998 pectin methyl esterase [Solanum tuberosum]	39610	RKKLFLALFTSILLVAAIIGVVAGVKSRKENSDHISSIKITPAHAIARSSCSNTLYPELCYSSIADSLNDNEKVKSKKDVIILSLNVTIAAVQRNYFSIKKLLAAGKSNFTEREKTALHDCLKTIDETLDELHNAVNNLEEYPLKKSIKEHADDLKTLLSSTITNQETCLDGFSHGKTDKNVREVLVGGQVLRVEKLCSNSLAMLTNMTDTDIENERRLSGGRKLVEAEGSSGWPEWLSAGDRRLLQSSSVTPDVVVAADGSGDYRTVAAAVAAAPQRSSRRYVIRIRAGVYREN	181|114	3.4|3.4	-|-	9|5	9|5	1|1	1|1	0.901	0.985	7	4	-	-	0.699	0.602	7	4	-	-	0.953	0.775	6	4	-	-	0.415	0.401	6	3	*	*	Unigene27577_All	69.77	2e-40	gi|71040051|gb|AAZ20274.1|	putative pectin methylesterase [Nicotiana attenuata]	79.59	8e-12	sp|P83218|PME_DAUCA	Pectinesterase OS=Daucus carota PE=1 SV=1	69.77	2e-39	Q45TP9	Q45TP9_NICAT Putative pectin methylesterase (Fragment) OS=Nicotiana attenuata GN=PME PE=2 SV=1	-
146	CL11800.Contig2_All	155 1411 minus strand PREDICTED: elongation factor 1-gamma-like [Vitis vinifera]	60662	MALVLHSTANKNAFKALIAAEYSGVKVELAKDFEMGVSNKTPGFIKMNPIGKIPVLETPDGPIFESNAIARYVARLNPDGPLYGSSLIDYGHIEQWIDFSTTEIDASIGNWLGPRIGFRVYLPLAEEAAIASLKRALGALNTHLASNTYLVGHGVTLADIVMVCTLTHGFKTIMTKSITSEFPHVERYVWTLVNQPNFKKIWGDVKQAESIPPVASKKPAQPKELAKPKPKEEPKKDVKKEEAKPKEVVEEEEAPKPKPKNPLDLLPPSKMILDEWKRLYSNTKTNFREVAIKGFWDMYDPEGYSLWFCNYKYNDENTVSFVTLNKVSGFLQRMDLARKYAFGKMLVIGSEAPYKVKGLWLFRGTEIPPYVLEECYDMELYDWTKVDINDEAQKERVNQ…	644|699	17.7|17.2	1|1	22|18	22|18	6|5	6|5	0.983	1.155	16	16	-	-	1.02	0.898	13	13	-	-	1.247	1.54	16	16	-	*	1.406	1.783	12	14	*	*	CL11800.Contig2_All	91.39	7e-80	gi|175363751|gb|ACB72462.1|	elongation factor 1 gamma-like protein [Nicotiana tabacum]	88.74	6e-78	sp|Q9ZRI7|EF1G1_ORYSJ	Elongation factor 1-gamma 1 OS=Oryza sativa subsp. japonica GN=Os02g0220600 PE=2 SV=1	91.39	2e-78	B9SKB3	B9SKB3_RICCO Elongation factor 1 gamma, putative OS=Ricinus communis GN=RCOM_0758170 PE=4 SV=1	SPAC29A4.02c
147	Unigene11200_All	1614 1811 chloroplast-specific ribosomal protein [Solanum lycopersicum] >gi|51457950|gb|AAU03364.1| chloroplast-specific ribosomal protein [Solanum lycopersicum]	9339	QIVRTKYFDMPPLTVAEAIEQLENVDHDFYGFRNEETGEVNIVYKRKSGGYGLIIPKGNGVTEKLE	62|90	33.3|33.3	-|-	2|3	1|1	2|2	1|1	---	---	1	1	-	-	---	---	1	1	-	-	---	---	1	1	-	-	---	---	1	1	-	-	Unigene11200_All	92.86	9e-08	gi|224093372|ref|XP_002334838.1|	predicted protein [Populus trichocarpa] >gi|222875354|gb|EEF12485.1| predicted protein [Populus trichocarpa]	80.3	3e-26	sp|P19954|PRSP1_SPIOL	Ribosome-binding factor PSRP1, chloroplastic OS=Spinacia oleracea GN=PSRP1 PE=1 SV=2	89.39	3e-28	I1KB15	I1KB15_SOYBN Uncharacterized protein OS=Glycine max GN=Gma.16683 PE=4 SV=1	all3184
148	CL9498.Contig1_All	1503 1913 minus strand unnamed protein product [Vitis vinifera]	19582	KTVEQEVKVTTKVEVESDAGNSISSITVETKYPLEITTTTLPGSVKDTYLMITKLEHSLKEEKKGEDKENGKFESKLVNSQKSSGWMFVQDHDVLSGAASTYQSYNLEDNFGCYTRRVFTDTGSIQNDTNNFLCAAA	54|39	10.9|10.9	1|1	3|1	3|1	1|1	1|1	---	---	1	1	-	-	---	---	1	1	-	-	---	---	1	1	-	-	---	---	1	1	-	-	CL9498.Contig1_All	46.6	7e-18	gi|462415401|gb|EMJ20138.1|	hypothetical protein PRUPE_ppa003363mg [Prunus persica]	-	-	-	-	41.07	5e-16	B9HHU5	B9HHU5_POPTR Predicted protein (Fragment) OS=Populus trichocarpa GN=POPTRDRAFT_420660 PE=4 SV=1	-
149	Unigene20336_All	29 598 minus strand predicted protein [Populus trichocarpa] >gi|118487258|gb|ABK95457.1| unknown [Populus trichocarpa] >gi|118488248|gb|ABK95943.1| unknown [Populus trichocarpa] >gi|222838841|gb|EEE77192.1| predicted protein [Populus trichocarpa	24842	LCSAHHPNKVKKREVRMAMAAKAYSPLLIRSMAAQKPIPSATKTVSSKKSTTVFPLGEPGPRVGYSASAPPVKLLTRVEQLRLLSKAEKAGLLSAAEKFGLSLSTIEKLGLLSKAEELGVLSAATDPGTPSTLLSLSLVLLVLGPACVFLVPEDYPWEIGLQVVVALLSVVGGSAAFATSNLVSNLQKSN	74|37	12.1|6.8	-|-	4|1	4|1	2|1	2|1	0.815	---	2	1	-	-	---	---	-	1	-	-	---	---	1	1	-	-	---	---	1	1	-	-	Unigene20336_All	82.82	1e-48	gi|255547173|ref|XP_002514644.1|	conserved hypothetical protein [Ricinus communis] >gi|223546248|gb|EEF47750.1| conserved hypothetical protein [Ricinus communis]	-	-	-	-	82.82	1e-47	B9RLM5	B9RLM5_RICCO Putative uncharacterized protein OS=Ricinus communis GN=RCOM_1469500 PE=4 SV=1	-
150	CL11542.Contig2_All	120 947 pom30 [Solanum tuberosum]	37460	MSKGPGLFSDIGKKAKDLLTRDYLSDHKFSVSTYSESGVALTTSTVKKGGYSSGDVAAQYIYKNTYVDVKVDTESNISATLTVANIVPSSKTIATLKFPNYESGKLEFQYFHPHASLTAAVGLNQAPPVDFSVTLGTPTFALGAEAGYETASGKLTKYTAGITVTKPESCASVILGDKGDTIKASYIHYMDQLKKSAAVGEITRKFSTNENTFTVGGSYAIDHLTLVKVKLNNHGTLGAVLQHEVIQKSLVTISSEFDTKALDKTPRFGVSLALRP	74|45	8.0|3.6	1|1	4|2	4|2	2|1	2|1	0.763	0.415	4	2	-	-	1.102	0.829	4	2	-	-	0.686	0.762	4	2	-	-	0.54	0.259	4	2	-	-	CL11542.Contig2_All	76.92	6e-122	gi|460377745|ref|XP_004234649.1|	PREDICTED: mitochondrial outer membrane protein porin 2-like [Solanum lycopersicum]	66.67	7e-108	sp|Q9FJX3|VDAC2_ARATH	Mitochondrial outer membrane protein porin 2 OS=Arabidopsis thaliana GN=VDAC2 PE=1 SV=1	76.81	6e-124	Q5CZ53	Q5CZ53_SOLTU Pom30 protein OS=Solanum tuberosum GN=pom30 PE=2 SV=1	-
151	CL3159.Contig3_All	194 2131 minus strand Heat shock protein 70 [Nicotiana tabacum]	87672	MAGKGEGPAIGIDLGTTYSCVGVWQHDRVEIIANDQGNRTTPSYVGFTDTERLIGDAAKNQVAMNPTNTVFDAKRLIGRRFTDASVQSDIKLWPFKVIPGPGDKPLIVVNYKGEDKQFAAEEISSMVLIKMREIAEAYLGSTVKNAVVTVPAYFNDSQRQATKDAGVIAGLNVMRIINEPTAAAIAYGLDKKATSVGEKNVLIFDLGGGTFDVSLLTIEEGIFEVKATAGDTHLGGEDFDNRMVNHFVQEFKRKHKKDISGNPRALRRLRTACERAKRTLSSTAQTTIEIDSLYEGVDFYSTITRARFEELNMDLFRKCMEPVEKCLRDAKMDKSTVHDVVLVGGSTRIPKVQQLLQDFFNGKELCKSINPDEAVAYGAAVQAAILSGEGNEKVQDLLL…	-|1381	-|32.5	-|-	-|53	-|1	-|14	-|1	-	---	-	1	-	-	-	---	-	-	-	-	-	---	-	-	-	-	-	---	-	1	-	-	CL3159.Contig3_All	97.73	0	gi|255573627|ref|XP_002527736.1|	heat shock protein, putative [Ricinus communis] >gi|223532877|gb|EEF34649.1| heat shock protein, putative [Ricinus communis]	95.2	0	sp|P27322|HSP72_SOLLC	Heat shock cognate 70 kDa protein 2 OS=Solanum lycopersicum GN=HSC-2 PE=2 SV=1	97.73	0	B9SP17	B9SP17_RICCO Heat shock protein, putative OS=Ricinus communis GN=RCOM_1248100 PE=3 SV=1	SPAC13G7.02c
152	CL2517.Contig1_All	118 1842 minus strand PREDICTED: U4/U6 small nuclear ribonucleoprotein PRP4-like protein-like [Vitis vinifera]	71930	MDIDEENTVSTSAAVSVPLAGNETVVSAIDAISLQPVQPVIAPVIPTPVIPPIAPIPAVPLPVSRPLAPLPVRPPVIRPPRAQNGDSRTSDSDSDQEESGSSRAAAGSTQEYEISEESRQARERQEKAVQELMMKRRAAALAVPTNDNAVRARLRRLGEPITLFGEREMERRDRLRTLMAKLDSEGQLERLMKAHEDEEAAAAVAPSEPEEDIQYPFYTEGSQALLEARREIAKYSIVKSALRLHRARRKKDDPDEDLDAEVDWSLKQAANLVLECSEIGDDRPLSGCSISHDGKMLATCSLSGVAKLWSMPEVKKVSALKGHTERATDVAFSPISYQLATASADRTARLWNLEGSVLRTFEGHLDRLARISFHPSGKYLGTASFDKTWRLWDVETGEE…	97|-	2.8|-	1|-	2|-	2|-	1|-	1|-	---	-	1	-	-	-	---	-	1	-	-	-	---	-	-	-	-	-	12521.8	-	2	-	-	-	CL2517.Contig1_All	84.57	9e-180	gi|297739880|emb|CBI30062.3|	unnamed protein product [Vitis vinifera]	66.3	2e-177	sp|O22212|PRP4L_ARATH	U4/U6 small nuclear ribonucleoprotein PRP4-like protein OS=Arabidopsis thaliana GN=EMB2776 PE=2 SV=1	83.78	0	A5ATG0	A5ATG0_VITVI Putative uncharacterized protein OS=Vitis vinifera GN=VITISV_016440 PE=4 SV=1	all0664
153	Unigene1537_All	205 1746 minus strand PREDICTED: endoglucanase 17 [Vitis vinifera]	65696	MASFRSFFTSSTVLVFLVFLLCYQQLPCNAYPAKHSPFSHHRHPRFASHNYRDALTKSIMFFEGQRSGKLPPNQRITWRKDSGLSDGSAVHVDLVGGYYDAGDNVKFGFPMAFTTTMLSWSVIEFGGLMKGELQHAKEAIRWATDYLLKATAHPGTIYVQVGDAGKDHACWERPEDMDTPRSVFKIDKNTPGTEVAAETAAALAAASLVFRKSDPTYSKLLARRAVSVFEFADKHRGAYSVGLRPYVCPYYCDFSGYQDELLWGAAWLHRATRNPTYLSYIQANGQTLGADESDNTFGWDNKHVGARILLSKAFLVQNVQPLHDYKSHADNYICSLIPGTPYSTAQYTPGGLLFKMNDSNMQYATSTSFLLVTYAKYLTTARKVVNCGGAIITPKKLRT…	24|-	1.9|-	-|-	1|-	1|-	1|-	1|-	---	-	-	-	-	-	---	-	-	-	-	-	---	-	-	-	-	-	---	-	-	-	-	-	Unigene1537_All	86.1	0	gi|297743914|emb|CBI36884.3|	unnamed protein product [Vitis vinifera]	76.94	0	sp|O81416|GUN17_ARATH	Endoglucanase 17 OS=Arabidopsis thaliana GN=At4g02290 PE=2 SV=1	85.99	0	B9SAU5	B9SAU5_RICCO Endo-1,4-beta-glucanase, putative OS=Ricinus communis GN=RCOM_1179080 PE=4 SV=1	-
154	Unigene5849_All	81 1232 hypothetical protein VITISV_023381 [Vitis vinifera]	56706	DKGIPEVAKETVPEPVTIGILEPTVADSESKSEAEHAEKRESKVESIEEPADIVDVPGSSSAEVVQEKVEKAEELPAKEVEPTEVKNVRVSETECKGEESSQSTLVEEKPPEQSEVTEQIEKEPPEAEPVEKVEVKSQTDKVDDTKLPKDEETSAIESSDQVKSETLITQVEEKDVECYPIDEVSQKTGEGNELKEPAKETIEVKGLSEEKVVEPKKIEAETEAPEAKTEEKSVVAEELVQCEEKPTEDAKSSVPPPELAEKAAEEEVTSRDIELVAETGNNKDETVVSSETTNNAVVEGKADKEASKEQEKIEETVQATEAKLEEEKQVDQKLEETVQAIEAKLEEGKQVDETAKTDVQNPECTKDSEDTKTSQDVPVKTQKQ	164|194	13.0|16.7	2|2	7|7	1|4	4|4	1|2	---	0.722	1	4	-	-	---	1.186	-	4	-	-	---	1.173	1	4	-	-	---	0.89	-	4	-	-	Unigene5849_All	-	-	-	-	-	-	-	-	-	-	-	-	-
155	CL4031.Contig1_All	126 1019 RecName: Full=Pyrroline-5-carboxylate reductase; Short=P5C reductase; Short=P5CR >gi|1928962|gb|AAC14482.1| pyrroline-5-carboxylate reductase [Actinidia deliciosa] >CL4031.Contig2_All 101 994 RecName: Full=Pyrroline-5-carboxylate redu	36778	ANIVPAPTESYKLGFIGAGKMAESIARGVVKSGVLPASQIRTAHLATARRTAFESIGVKVLRQNSQVVQESDVVIFSVKPQVVKDVVLHLRPLLSEKQLLVSVVAGVKLKDLQEWAGHSRFIRVMPNTPAAVGVAASESMSSLITVYTHVUMMQFPUENYLCTVISLGTAATKDDGELIAKLFGAIGKVWTADEKLFDAITGLSGSGPAYIYLAIEALADGGVAAGLPRELALGLASQTVLGAASMVANVGKHPGQLKDDVASPGGTTIAGIHELEKAGFRGILMNAVVAAAKRSREL	28|-	4.0|-	3|-	1|-	1|-	1|-	1|-	---	-	1	-	-	-	---	-	1	-	-	-	---	-	1	-	-	-	---	-	1	-	-	-	CL4031.Contig1_All	76.85	4e-118	gi|3024430|sp|O04016.1|P5CR_ACTCH	RecName: Full=Pyrroline-5-carboxylate reductase; Short=P5C reductase; Short=P5CR >gi|1928962|gb|AAC14482.1| pyrroline-5-carboxylate reductase [Actinidia deliciosa]	76.85	1e-118	sp|O04016|P5CR_ACTCH	Pyrroline-5-carboxylate reductase OS=Actinidia chinensis PE=2 SV=1	74.83	5e-115	F1KLT8	F1KLT8_IPOBA Pyrroline-5-carboxylate reductase OS=Ipomoea batatas GN=P5CR PE=2 SV=1	MA4102
156	CL1401.Contig1_All	198 2015 minus strand PREDICTED: DEAD-box ATP-dependent RNA helicase 37-like [Vitis vinifera] >CL1401.Contig2_All 238 2055 minus strand PREDICTED: DEAD-box ATP-dependent RNA helicase 37-like [Vitis vinifera]	71641	MRTSWADAVENVATGSSGSAGTSGGNERTSAPNKSAYVPPHLRNRPPASEPPASSLSGPPAGNDNRFGYSGPASGSQWAGSRSDYGRQGYGGGGRGSGGWGGREREVNPFGKDDVDADTEPAFNEQENTGINFDAYEDIPVETSGDNVPSPVNTFAEIDLGDALNLNIRRCKYVKPTPVQRHAIPISLAGRDLMACAQTGSGKTAAFCFPIISGIMRGHLPNRPRGVRTVFPLALILSPTRELSVQIHDEARKFSYQTGVRVVVAYGGAPINQQLRELERGVDILVATPGRLVDLLERAKVSLQMIRYLALDEADRMLDMGFEPQIRKIVEQMDMPPRGERQTMLFSATFPKEIQRLASDFLSNYLFLAVGRVGSSTDLIVQRVEFVHGTDKRSHLMDL…	34|117	2.1|3.3	2|2	2|3	2|3	1|2	1|2	---	1.146	-	2	-	-	---	---	-	1	-	-	---	0.908	-	2	-	-	---	---	-	1	-	-	CL1401.Contig1_All	91.37	3e-180	gi|297739789|emb|CBI29971.3|	unnamed protein product [Vitis vinifera]	83.78	0	sp|Q6Z4K6|RH52B_ORYSJ	DEAD-box ATP-dependent RNA helicase 52B OS=Oryza sativa subsp. japonica GN=PL10B PE=2 SV=1	90	1e-145	F6GUJ5	F6GUJ5_VITVI Putative uncharacterized protein OS=Vitis vinifera GN=VIT_06s0004g00850 PE=4 SV=1	AGc4238
157	Unigene9395_All	119 796 elongation factor 1-beta, putative [Ricinus communis] >gi|223537506|gb|EEF39131.1| elongation factor 1-beta, putative [Ricinus communis]	31841	MAVTFSDLHTESGLKALDDFLSGKSYISGDQLTKDDVKVYAAVLEKPSADLYSNASKWYETVSAKLAPSFPGKAVGVRVGGQAAAAEPAAPAEEAKESAADDDDDLDLFGDETEEEKKAAEQREAAKASTKKKESGKSSVLMDIKPWDDETDMKKLEESVRSVEIPGLLWGASKLVPVGYGIKKLQIMLTIVDDLVSVDDLIEDRLTAEPCNEYVQSCDIVAFNKI	965|754	64.6|54.9	-|-	58|28	51|25	11|9	10|8	0.518	0.508	36	19	-	-	0.486	0.506	32	19	*	*	1.35	1.316	36	19	*	*	0.324	0.284	34	19	-	-	Unigene9395_All	89.66	6e-31	gi|386278566|gb|AFJ04515.1|	elongation factor 1-beta [Vernicia fordii]	85.06	2e-28	sp|P29545|EF1B_ORYSJ	Elongation factor 1-beta OS=Oryza sativa subsp. japonica GN=Os07g0662500 PE=1 SV=3	90.8	3e-30	B3TLP3	B3TLP3_ELAGV Translation elongation factor EF-1 beta chain OS=Elaeis guineensis var. tenera PE=2 SV=1	SPCC1450.04
158	CL12155.Contig1_All	169 777 PREDICTED: ran-binding protein 1 homolog c-like [Vitis vinifera] >CL12155.Contig2_All 169 777 PREDICTED: ran-binding protein 1 homolog c-like [Vitis vinifera]	30559	MASKDEEPREEEEEAAPEDEDTGAQVAPIVKLEVVAVTTGEEDEEAILDLKSKLYRFDKEGNQWKERGAGSVKLLKHKVNGKVRLVMRQSKTLKICANHLVLPTMTVQEHAGNDKSCVWHAPDFADGELKDEMFCLRFPSVENCKTFMEMFQEVAESQKREESKDASVTAGLLEKLTVEDKKAKNDKNAKEKAEEEVPASGSE	35|37	5.4|5.4	-|-	1|1	1|1	1|1	1|1	---	---	1	1	-	-	---	---	1	1	-	-	---	---	1	1	-	-	---	---	1	1	-	-	CL12155.Contig1_All	87.34	2e-77	gi|225439378|ref|XP_002262903.1|	PREDICTED: ran-binding protein 1 homolog c [Vitis vinifera] >gi|296081117|emb|CBI18249.3| unnamed protein product [Vitis vinifera]	80.38	2e-68	sp|Q8RWG8|RBP1B_ARATH	Ran-binding protein 1 homolog b OS=Arabidopsis thaliana GN=RANBP1B PE=1 SV=2	87.34	2e-76	D7SRG8	D7SRG8_VITVI Putative uncharacterized protein OS=Vitis vinifera GN=VIT_08s0217g00030 PE=4 SV=1	YDR002w
159	CL832.Contig4_All	302 2551 minus strand psaA gene product (chloroplast) [Sesamum indicum] >gi|347448295|gb|AEO92706.1| photosystem I P700 chlorophyll a apoprotein A1 (chloroplast) [Sesamum indicum]	89265	MIIRSPEPEVKILVDKDPVKTSFEEWAKPGHFSRTIAKGPDTTTWIWNLHADAHDFDSHTSDLEEISRKVFSAHFGQLSIIFLWLSGMYFHGARFSNYEAWLSDPTHIGPSAQVVWPIVGQEILNGDVGGGFRGIQITSGFFQIWRASGITSELQLYCTAIGALVFAALMLFAGWFHYHKAAPKLAWFQDVESMLNHHLAGLLGLGSLSWAGHQVHVSLPINQFLNAGVDPKEIPLPHEFILNRDLLAQLYPSFAEGATPFFTLNWSKYAEFLTFRGGLDPVTGGLWLTDIAHHHLAIAILFLIAGHMYRTNWGIGHGLKDILEAHKGPFTGQGHKGLYEILTTSWHAQLSLNLAMLGSLTIVVAHHMYSMPPYPYLATDYGTQLSLFTHHMWIGGFLI…	234|228	5.3|4.4	-|-	12|8	12|8	4|3	4|3	0.721	0.647	10	6	-	*	1.864	1.21	9	6	*	-	0.575	0.902	9	6	*	-	2.963	0.645	8	6	-	-	CL832.Contig4_All	99.87	0	gi|442742963|ref|YP_007353915.1|	photosystem I P700 chlorophyll a apoprotein A1 (chloroplast) [Tectona grandis] >gi|438687604|emb|CCP47130.1| photosystem I P700 chlorophyll a apoprotein A1 (chloroplast) [Tectona grandis] >gi|438688288|emb|CCP47219.1| photosystem I P700 chlorophyll a apoprotein A1 (chloroplast) [Tectona grandis] >gi|438688412|emb|CCP47308.1| photosystem I P700 chlorophyll a apoprotein A1 (chloroplast) [Tectona gr…	99.47	0	sp|A0A335|PSAA_COFAR	Photosystem I P700 chlorophyll a apoprotein A1 OS=Coffea arabica GN=psaA PE=3 SV=1	99.73	0	G9IB62	G9IB62_SESIN Photosystem I P700 chlorophyll a apoprotein A1 OS=Sesamum indicum GN=psaA PE=3 SV=1	-
160	CL1066.Contig1_All	410 1165 minus strand 40S ribosomal protein S2, putative [Ricinus communis] >gi|223547401|gb|EEF48896.1| 40S ribosomal protein S2, putative [Ricinus communis]	35449	ASEAGGGGGGAPPPRRETEEEKWVPVTKLGRLVRDGKIKSVEQIYLHSLPIKEYQIIDALVGPSLKDEVMKIMPVQKQTRAGQRTRFKAFVVVGDGNGHVGLGVKCSKEVATAIRGSIILAKLSVIPVRRGYWGNKIGKPHTVPCKVTGKCGSVTVRMVPAPRGAGIVAARVPKKVLQFAGIEDVFTSSRGSTKTLGNFVKATFDCLLKTYGFLTPDFWKETRFTKSPFQEYTDLLAKPTAKIVHAVEDVEA	295|292	17.5|19.4	6|6	8|9	1|9	3|4	1|4	---	0.971	1	7	-	-	---	1.003	1	6	-	-	---	1.099	1	6	-	-	---	1.05	1	6	-	-	CL1066.Contig1_All	96.21	3e-117	gi|413968608|gb|AFW90641.1|	40S ribosomal protein S2 [Solanum tuberosum]	90	1e-116	sp|Q93VB8|RS22_ARATH	40S ribosomal protein S2-2 OS=Arabidopsis thaliana GN=RPS2B PE=2 SV=1	94.2	8e-122	E5GBY7	E5GBY7_CUCME 40S ribosomal protein s2 OS=Cucumis melo subsp. melo PE=3 SV=1	SPCC576.08c
161	Unigene19764_All	115 1662 minus strand PREDICTED: trigger factor isoform 1 [Vitis vinifera] >gi|297737496|emb|CBI26697.3| unnamed protein product [Vitis vinifera]	72188	SSVSLLKGHILKPIKKIKQFPLAPSSRQFSHPQHTSRRTILTRFVASAAPTTADNTVADKLPADIQVTETPEPNSRVRLSVEVPAAVCDDCYRRVIKEFMKRSKVPGFRPGKNVPESILIGYVGKETVKKAAIESILKRTLPHAMSSVSGRALEDSIRISTKFPEMENTYSSMKSLRYDVIVDVAPEVKWIPEDGYKNLKIVVEIDKEIDAQTAAEQELRRRHKALGSLRIVTERGLEVGDVAILDISATTIEQDESAAQRIPSAESKGFQFDTEDGNKVLPDFLDKIVGIKRGETKSFPYVFPDSWKQEDLRGVHAQFTVDCKELFYRDLPELNDSVADKILSGCSTIEEVKETLLKKFLEVEQTAKEQATDNAILDQLHKMVEVDIPPSLFEEQGRQ…	101|92	8.9|9.7	-|-	7|5	7|5	4|5	4|5	1.176	1.172	5	2	-	-	1.504	0.934	4	2	*	-	0.764	1.378	5	2	-	-	1.5	1.485	4	2	-	-	Unigene19764_All	76.69	6e-53	gi|388500168|gb|AFK38150.1|	unknown [Medicago truncatula]	64.41	0	sp|Q8S9L5|TIG_ARATH	Trigger factor-like protein TIG OS=Arabidopsis thaliana GN=TIG PE=2 SV=1	76.64	0	B9SYY0	B9SYY0_RICCO Trigger factor, putative OS=Ricinus communis GN=RCOM_0546740 PE=4 SV=1	alr3681
162	CL9831.Contig1_All	3 173 minus strand UPF0603 protein At1g54780, chloroplastic OS=Arabidopsis thaliana GN=At1g54780 PE=1 SV=1	7297	ALAISLAVNFSCPILTDAAFASEFDVLNDGPPKDSYVVDDAGVLSRVTKSDLKRLLS	75|61	22.8|22.8	-|-	3|2	3|2	1|1	1|1	0.008	2.078	2	2	-	-	---	---	-	1	-	-	---	0.863	1	2	-	-	---	---	1	1	-	-	CL9831.Contig1_All	94.12	6e-11	gi|242090463|ref|XP_002441064.1|	hypothetical protein SORBIDRAFT_09g019720 [Sorghum bicolor] >gi|241946349|gb|EES19494.1| hypothetical protein SORBIDRAFT_09g019720 [Sorghum bicolor]	85.71	5e-11	sp|A2Y4G9|U603_ORYSI	UPF0603 protein OsI_019212, chloroplastic OS=Oryza sativa subsp. indica GN=OsI_19898 PE=3 SV=2	94.12	8e-10	C5YXM9	C5YXM9_SORBI Putative uncharacterized protein Sb09g019720 OS=Sorghum bicolor GN=Sb09g019720 PE=4 SV=1	-
163	CL3904.Contig1_All	80 811 minus strand ribonucleoprotein, chloroplast, putative [Ricinus communis] >gi|223547691|gb|EEF49184.1| ribonucleoprotein, chloroplast, putative [Ricinus communis] >CL3904.Contig2_All 80 811 ribonucleoprotein, chloroplast, putative [Rici	33241	MATFSSSSSSFLIPPNFLQKPFKTHIPKLSFQPLKPHSIPLKFTRRRLNAVAEDTSVLTADPSSVAARRLYVGNIPRTVTNDELQKIVEEHAAVEKAEVMYDKYSGRSRRFAFVTMKTVEDANAAIEKLNGTEVGGREIKVNITEKPLTSLELSLLQAEESQFVDSPHKVYVGNLAKTVTMDTLKNFFAEKGRVLSAKVSRVPGTSKSSGYGFVTFSSEEDVEAAISSLNNAVLEGQKIRVNKA	100|46	8.6|3.3	1|2	9|3	9|3	3|1	3|1	1.914	2.603	4	2	-	*	0.672	0.713	4	2	-	-	1.064	1.052	4	2	-	-	1.571	1.922	4	2	-	*	CL3904.Contig1_All	88.14	2e-72	gi|356557128|ref|XP_003546870.1|	PREDICTED: 30S ribosomal protein 2, chloroplastic-like [Glycine max]	76.54	4e-66	sp|P82277|RRP2_SPIOL	30S ribosomal protein 2, chloroplastic OS=Spinacia oleracea GN=PSRP2 PE=1 SV=1	86.59	2e-72	I1KTJ9	I1KTJ9_SOYBN Uncharacterized protein OS=Glycine max PE=4 SV=1	SPAC140.02
164	Unigene8191_All	231 2810 beta-galactosidase STBG2 [Solanum lycopersicum]	112448	LIVQSLIVAGEFFKPFNVSYDGRAMIIDGERRMLISGGIHYPRATPEMWPDLISKSKEGGVDVIETYVFWNGHEPVRGQYDFEGRYDLVKFVKLVGSSELYLFLRIGPYVCAEWNFGGFPVWLRDIPGIEFRTDNMPFKEEMQRFVKKIVDLMREESLFSWQGGPIIMLQIENEYGNIENSYGPNGKDYMRWAAKMAVGLGAGVPWVMCKQVDAPEYIIDTCNGYYCDGFKPNSNKKPTIWTENWDGWYTSWGDRVPHRPAEDIAFAVARFFQRGGSLQNYYMYFGGTNFGRTAGGPNYITSYDYDAPIDEYGLLRQPKWGHLKDLHAAIKLCEPALVAVRSPQYIKLGPKQEAHVYRDNGSKCSAFLANIDEQNSATVKFLNQAYTLPPWSVSILPDC…	58|179	3.6|5.6	-|-	4|9	4|9	3|4	3|4	1.188	0.693	2	4	-	-	1.467	1.599	2	4	*	-	0.59	0.54	2	3	-	-	0.899	0.819	2	3	-	-	Unigene8191_All	73.23	0	gi|332105893|gb|AEE01408.1|	beta-galactosidase STBG2 [Solanum lycopersicum]	69.28	0	sp|Q9SCV3|BGAL9_ARATH	Beta-galactosidase 9 OS=Arabidopsis thaliana GN=BGAL9 PE=2 SV=1	73.23	0	F4ZE23	F4ZE23_SOLLC Beta-galactosidase OS=Solanum lycopersicum PE=2 SV=1	XF0840
165	CL6695.Contig1_All	189 1367 minus strand PREDICTED: chaperone protein dnaJ 10 [Vitis vinifera] >gi|297745644|emb|CBI40809.3| unnamed protein product [Vitis vinifera]	54094	MVKETEYYDVLGVSPTATEAEIKKAYYVKARQVHPDKNPNDPLAAQNFQILGEAYQVLSDPAQRQAYDAYGKSGISTESIIDPAAIFAMLFGSELFEEYIGQLAMASMASLDVFTDGEDFDTKKLQEKMRTVQKEREEKLAGILKDRLNLYVQGNKEDFIHHAEAEVARLSNAAYGVDMLSTIGYIYARQAAKELGKKVMYLGVPFIAEWFRNKGHFIKSQVTAATGAIALIQLQEDMKRQLSAEGNYTEEELEEYMQSHKKLMIDSLWKLNVADIEATLSRVCQMVLHDNNAKKEELRLRAKGLKTLGKIFQRVKSVNENDTESMLRDPSHKLNGSEPSKNTAPLNTSAKSLNNEESYSAFIAQSPYVEAPQFPGAQFNNFPMPTAPPGAHK	27|26	3.1|3.1	3|3	1|1	1|1	1|1	1|1	---	---	-	-	-	-	---	---	-	-	-	-	---	---	-	-	-	-	---	---	-	-	-	-	CL6695.Contig1_All	92.73	4e-24	gi|321149989|gb|ADW66142.1|	DnaJ protein [Solanum nigrum]	73.77	1e-156	sp|Q8GYX8|DNJ10_ARATH	Chaperone protein dnaJ 10 OS=Arabidopsis thaliana GN=ATJ10 PE=2 SV=2	90.31	1e-118	I1JB19	I1JB19_SOYBN Uncharacterized protein OS=Glycine max PE=4 SV=1	YER048c
166	CL5026.Contig1_All	7 321 minus strand PREDICTED: ABC transporter I family member 6, chloroplastic [Vitis vinifera] >gi|296087808|emb|CBI35064.3| unnamed protein product [Vitis vinifera]	13731	SSMALFTPSFSFRISTSTCRQHRRFVQSPRTFTPRATVAVETPSSSAADRGGAPKLLLEVKDLSAVIAESKQPILKGVNLTVHEGEVHAVMGKNGSGKSTFAKIM	-|32	-|9.5	-|1	-|1	-|1	-|1	-|1	-	---	-	1	-	-	-	---	-	1	-	-	-	---	-	1	-	-	-	---	-	1	-	-	CL5026.Contig1_All	75.44	1e-16	gi|21537227|gb|AAM61568.1|	putative ABC transporter ATPase [Arabidopsis thaliana]	75.44	4e-17	sp|Q9CAF5|AB6I_ARATH	ABC transporter I family member 6, chloroplastic OS=Arabidopsis thaliana GN=ABCI6 PE=1 SV=1	73.68	1e-15	D7L921	D7L921_ARALL ATNAP7 OS=Arabidopsis lyrata subsp. lyrata GN=ARALYDRAFT_478401 PE=4 SV=1	BMEI1041
167	CL3956.Contig1_All	234 1097 conserved hypothetical protein [Ricinus communis] >gi|223549697|gb|EEF51185.1| conserved hypothetical protein [Ricinus communis]	42201	MGGKGGKKKGLNATPGSQPRVSMTLREASSGKKQGNVNAKTMCKLDHLKNLAVWAAAEASVPSLGAFFGERLAATTEVLGLRPDPSLFVCERCESILQPGHNCTVRIEKNKSKMRHRRKKSHLATQNNVVYRCHFCSHRNLMRGTPKGYVKEICPPQAKPPSKLEHAQSFVEKCPSLAKATSIAKVNTVDTVALPTVDGLILETSCPATPLPTTTLSLLDSKRRKRNKSGAKKVVEPETSSTAADAEKSTHASIKRRKKSWTSLKEIAESSGHDISKKLTNLTIPFFI	15|-	2.4|-	1|-	1|-	1|-	1|-	1|-	---	-	-	-	-	-	---	-	-	-	-	-	---	-	-	-	-	-	---	-	-	-	-	-	CL3956.Contig1_All	64.96	6e-42	gi|462406528|gb|EMJ11992.1|	hypothetical protein PRUPE_ppa018166mg [Prunus persica]	-	-	-	-	50.73	8e-58	B9SUR0	B9SUR0_RICCO Putative uncharacterized protein OS=Ricinus communis GN=RCOM_0627370 PE=4 SV=1	-
168	CL12531.Contig1_All	127 1791 minus strand RecName: Full=Glutathione reductase, chloroplastic; Short=GR; Short=GRase; Flags: Precursor >gi|431955|emb|CAA53925.1| glutathione reductase (NADPH) [Nicotiana tabacum]	71031	ATSLSTPRLGSSLSSPAFQTLRNYKFPVSFLSFSHCTKSLTSRNFFHSISSPNPRRRFTTAIRAESTNGSEPPGHYDFDLFTVGAGSGGVRASRFAANFGAKVAVCELPFATISSDSTGGVGGTCVLRGCVPKKLLVYASKFSHEFEESCGFGWNYEAEPKHDWSTLIANKNAELQRLTGIYKNILKSAGVTLIEGRGKIVDPHTVDVNGKLYSAKNILISVGGRPFIPDIPGSEYAIDSDAALDLPSKPKKIAIVGGGYIAVEFAGIFNGLTSDVHVFIRQKKVLRGFDEEIRDFVGEQMSLRGIEFHTEETPQAIIKSSDGLLSLKTNKGTVDGFSHVMFATGRKPNTKNLGLEAVGVKLSKNGAIEVDEYSRTSVPSIWAVGDVTDRINLTPVALM…	192|386	11.0|12.8	1|1	9|12	9|12	4|5	4|5	0.93	1.156	8	10	-	-	1.717	1.194	8	9	*	-	0.826	1.164	8	9	-	-	1.521	1.311	8	10	-	-	CL12531.Contig1_All	95.83	8e-64	gi|220967700|gb|ACL97548.1|	chloroplast glutathione reductase [Solanum lycopersicum]	84.08	0	sp|P80461|GSHRP_TOBAC	Glutathione reductase, chloroplastic (Fragment) OS=Nicotiana tabacum GN=GOR PE=1 SV=1	89.71	3e-126	F2VPS4	F2VPS4_SOLNI Chloroplast glutathione reductase (Fragment) OS=Solanum nigrum GN=GR PE=2 SV=1	CC2302
169	CL2171.Contig2_All	189 872 Small rubber particle protein, putative [Ricinus communis] >gi|223545968|gb|EEF47471.1| Small rubber particle protein, putative [Ricinus communis]	31551	QVEVEGSEMQLKHLRFVRILTINAVVLVSNIYDYAKQNSGSLKSTVDTVENAVTTVVGPVYDRLKGVPSDLLIFLDRKVDEATHKIDECAPLAAKNVVFKAQLVVKKASQAAQDLVEEAKVAGPLAAVSHASTISKHFAVSQLAVVWYKVNQHHALHGVSEMAIPTAAHWSEKYNNLVKNMAAKGYKLFNYVPLVPVEEMANAYKQVEAAAGKKADTASSSESESDKE	-|46	-|5.3	-|-	-|1	-|1	-|1	-|1	-	---	-	1	-	-	-	---	-	1	-	-	-	---	-	-	-	-	-	---	-	-	-	-	CL2171.Contig2_All	59.23	7e-36	gi|297738452|emb|CBI27653.3|	unnamed protein product [Vitis vinifera]	49.32	3e-55	sp|Q9FYF7|Y1736_ARATH	REF/SRPP-like protein At1g67360 OS=Arabidopsis thaliana GN=At1g67360 PE=2 SV=1	54.98	2e-59	A9P8H1	A9P8H1_POPTR Predicted protein OS=Populus trichocarpa GN=POPTRDRAFT_640021 PE=2 SV=1	-
170	CL7231.Contig1_All	1236 1523 minus strand Aminotransferase ybdL, putative [Ricinus communis] >gi|223546868|gb|EEF48365.1| Aminotransferase ybdL, putative [Ricinus communis] >CL7231.Contig2_All 1191 1478 minus strand Aminotransferase ybdL, putative [Ricinus com	14292	LQKKTILVEGLKSVGFTVYPSSGTYFVVVDHTQFGLENDVAFCEYLIKEVGVVAIPTSVFYLNPEEGKNLVRFTFCKDEGTLRSAVERMKEKLLKK	31|29	20.8|8.3	1|-	1|1	1|1	1|1	1|1	---	---	1	-	-	-	---	---	1	-	-	-	---	---	1	-	-	-	---	---	1	-	-	-	CL7231.Contig1_All	91.4	1e-44	gi|462420214|gb|EMJ24477.1|	hypothetical protein PRUPE_ppa005521mg [Prunus persica]	43.33	8e-15	sp|P77806|YBDL_ECOLI	Methionine aminotransferase OS=Escherichia coli (strain K12) GN=ybdL PE=1 SV=1	87.5	2e-43	B9RJ63	B9RJ63_RICCO Aminotransferase ybdL, putative OS=Ricinus communis GN=RCOM_1031640 PE=4 SV=1	ZybdL
171	Unigene27503_All	233 1522 minus strand porphobilinogen synthase, putative [Ricinus communis] >gi|223546832|gb|EEF48329.1| porphobilinogen synthase, putative [Ricinus communis]	53916	MASMMLNSVNFSAGRAVKVDYVGLKPLKVHQNIVCVRPHSIKIAQRMLTIMAGEIREDGPVKKMGMSDEECEAAVVAGNIPEAPPVPPKPAAPAGTPDVSSLPLSRRPRRNRRSPALRAAFQETTLSPSNLVYPLFIHEGEEDTPIGAMPGCYRLGWRRGLVEEVSKARDVGVNSIVLFPKVPDALKTSTGDEAYNENGLVPRTIRLLKDKYPDLVIYTDVALDPYSSDGHDGIVREDGVIMNDETVHQLCKQAVAQARAGADVVSPSDMMDGRVGAIRAALDAEGFQHVSIMSYTAKYASSFYGPFREALDSNPRFGDKKTYQMNPANYREALVETREDESEGADILLVKPGLPYLDIIRLLRDNSPLPIAAYQVSGEYSMIKAGGVLKMIDEERVMM…	96|58	6.3|7.4	-|-	6|2	6|2	2|2	2|2	1.099	0.578	5	2	-	-	1.472	0.376	4	2	-	-	1.183	1.825	3	2	-	-	1.838	0.391	4	2	-	-	Unigene27503_All	97.12	2e-115	gi|253787597|dbj|BAH84858.1|	putative delta-aminolevulinic acid dehydratase [Cucumis sativus]	88.93	2e-163	sp|Q5Z8V9|HEM2_ORYSJ	Delta-aminolevulinic acid dehydratase, chloroplastic OS=Oryza sativa subsp. japonica GN=HEMB PE=2 SV=1	97.12	2e-114	C6L811	C6L811_CUCSA Delta-aminolevulinic acid dehydratase (Fragment) OS=Cucumis sativus GN=CsALAD PE=2 SV=1	all4725
172	CL3840.Contig1_All	256 3159 minus strand unnamed protein product [Vitis vinifera]	124269	TTTTTFCPSSFQLKLALGGRKSPLAFVRTRFPDVDLRSVNFVSVVVRSSAVNDNGVERRSSGNSSWTNLNSSTDGFSGWANADAERNSGDSKPKQSLIGILGAGAAGVVLVAGITFAALSISNRSTSRVKEQMEPLTTQQEKSLSSDNNLNQVEEEKKEDKVGMQESGSEESKTGTNGDPSLYKENSEAIESRISDDTGVRQSSEDGDGSTPKAVQRESAVSDSSVSPEATDKPPMSDITGGSLALPSIQSNNGSLASENPIEPAAEKLADTKILEPSVFDANSENLVTEHPNGVSGLNEWENSNLSLDPSSVQPSIPNILVKSELDAVIESSIIQEEFMESGSVLSTRDVERSKELLTVDVVPSKIVEVAADGDDKSPVGKILNGTVSTGAPLVPEVA…	37|55	1.1|2.4	-|-	1|2	1|2	1|2	1|2	---	0.951	1	2	-	*	---	0.973	1	2	-	-	---	0.984	1	2	-	-	---	0.896	1	2	-	-	CL3840.Contig1_All	75	6e-28	gi|374922023|gb|AFA26189.1|	hypothetical protein, partial [Lolium perenne]	-	-	-	-	75	6e-27	H6WQH1	H6WQH1_LOLPR Putative uncharacterized protein (Fragment) OS=Lolium perenne PE=2 SV=1	-
173	CL2288.Contig12_All	430 2157 minus strand PREDICTED: uncharacterized protein LOC100781040 [Glycine max]	79143	MLGRPSFTLSRNGSFRAENLGQNALAMIGNLCFTFFVVGVLVFTIIAATYQPEDPLFHPSSKITTFLTSNSNATFKSDIAVVKTGEDFVASNQTAFATFINITDVDSAVVATEPEELNVVSQTRDCRIDDPINCRDPDVFHLLMRSAIEKFKDIHFYRFGKPVPGNNDSSCHMAWRFRPKEGKAAAFYKDYRSFTLVRSENCTFSVAGIGDYHSGGNARKRKGKGRGKNREKDKEVFEKVPAKVEDNPIALPEVGETVNDALPTVESEGSFSHGKYLIYSGGGDRCKSMHQYLWSFMCMLGEAQYLNRTLVMDLSICLSKIYTSSGQDEEGKDFRFYFDFEHLMDSASVLDQNQFWSDWSKWQQKDGLSLHLVEDFRVTPMKLAGVKDSLIMRKFGTVE…	23|-	2.1|-	1|-	1|-	1|-	1|-	1|-	---	-	-	-	-	-	---	-	-	-	-	-	---	-	-	-	-	-	---	-	-	-	-	-	CL2288.Contig12_All	77.45	0	gi|460396049|ref|XP_004243592.1|	PREDICTED: uncharacterized protein LOC101266139 [Solanum lycopersicum]	-	-	-	-	75.82	7e-163	B7FM32	B7FM32_MEDTR Putative uncharacterized protein OS=Medicago truncatula PE=2 SV=1	-
174	CL103.Contig1_All	98 586 minus strand putative transcription factor Btf3 [Capsicum annuum] >CL103.Contig3_All 113 601 putative transcription factor Btf3 [Capsicum annuum] >CL12656.Contig1_All 96 584 putative transcription factor Btf3 [Capsicum annuum]	22787	MNVEKLMKMAGSVRTGGKGTMRRKKKAVHKTTTTDDKRLQSTLKRIGVNAIPAIEEVNIFKEDVVIQFINPKVQASIAANTWVVSGTPQNKKLQDILPQIIHQLGPDNLENLKKLAEQFQKQAPAAGSGTASGATVALDDDDDEVPELVPGQTFEAAAEEGHT	661|407	28.2|28.2	-|-	23|15	1|2	3|3	1|1	---	1.048	-	2	-	-	---	---	-	1	-	-	---	0.76	-	2	-	-	---	---	-	1	-	-	CL103.Contig1_All	94.26	5e-53	gi|388507122|gb|AFK41627.1|	unknown [Lotus japonicus]	58.54	2e-26	sp|Q6PC91|BT3L4_DANRE	Transcription factor BTF3 homolog 4 OS=Danio rerio GN=btf3l4 PE=2 SV=1	93.68	9e-45	B4YYC3	B4YYC3_THEHA ST7-5-1 (Fragment) OS=Thellungiella halophila PE=2 SV=1	-
175	Unigene23773_All	160 801 uncharacterized protein LOC100306051 [Glycine max]	29429	SSSLSYSSNPFLLPQLRFSSRLSTFPKIYALTSNDIKVGLNIEVDGNPWKVIEFLHVKPGKGAAFVRTTLRNYVTGNQVDKTFRAGSKLEEADIFKETKQYTYKDGSQYVFMDLNTYEEFRLNEADVGDKSKWLKEGMDCNLLFWKGKVIDFELPITVKLTVVEVDPGVRGDTAQGGSKPATLDTGAVVSVPLFIDIGEEILVDTRTGQYMSRA	236|178	14.0|14.0	-|-	14|11	14|11	3|3	3|3	1.497	1.358	11	10	*	*	0.931	1.216	7	9	-	-	1.214	1.049	11	10	-	-	1.585	1.684	7	9	*	*	Unigene23773_All	83.78	2e-90	gi|224139364|ref|XP_002323076.1|	predicted protein [Populus trichocarpa] >gi|222867706|gb|EEF04837.1| predicted protein [Populus trichocarpa]	60.11	2e-61	sp|B1XKV1|EFP_SYNP2	Elongation factor P OS=Synechococcus sp. (strain ATCC 27264 / PCC 7002 / PR-6) GN=efp PE=3 SV=1	83.78	2e-89	B9IGT1	B9IGT1_POPTR Predicted protein (Fragment) OS=Populus trichocarpa GN=POPTRDRAFT_254402 PE=3 SV=1	slr0434
176	CL10042.Contig1_All	94 978 GRX1 [Nicotiana benthamiana]	39182	MAAFNLSYPTHSPSSPRIFSQISPSRNTLALSFYSLPNPALLFPSTSLKRSSPLKYRRLSLVVSVLKKLSETDLVAVSSESDGIFPSDSGVYAIYDGSGDLQFVGITRNIAASVLAHKKSVPELCCSVKVAVVEEPDKTALTEAWKSWMQEHIAATGKVPPGNEPGNTTWVKKAPGKKSDLRLTPGRHVQLTVPLEDLIDRLVKENKVVAFIKGSRSAPLCGFSQRVVAILESQGVEYESVDVLDEEYNYGLRETLKKYSNWPTFPQIFVNGELVGGCDILTSMYEKGELAGLLK	57|35	2.7|2.7	-|-	2|1	2|1	1|1	1|1	1.312	---	2	1	-	-	0.709	---	2	1	-	-	0.947	---	2	1	-	-	0.859	---	2	1	-	-	CL10042.Contig1_All	81.52	8e-101	gi|224139136|ref|XP_002322989.1|	glutaredoxin S16 [Populus trichocarpa] >gi|222867619|gb|EEF04750.1| glutaredoxin S16 [Populus trichocarpa]	71.03	2e-86	sp|Q2QX01|GRS12_ORYSJ	Monothiol glutaredoxin-S12, chloroplastic OS=Oryza sativa subsp. japonica GN=GRXS12 PE=2 SV=1	81.52	8e-100	B9IGC0	B9IGC0_POPTR Glutaredoxin S16 OS=Populus trichocarpa GN=PtrcGrx_S16 PE=4 SV=1	RP745
177	CL921.Contig10_All	129 1280 minus strand predicted protein [Populus trichocarpa] >gi|222856595|gb|EEE94142.1| predicted protein [Populus trichocarpa]	50958	MGKVSLIIYITVAVVLLLLISRSSNNNKSHGNRHRRLKIRSNFNFTPPADPHHLHDRAAFDPLVADVERKREDKQWEHHYFQTHHPEFHSESTQSMSAPGRESSEPEWEDFMDAEDYLNDEEKFNVTNRLVILFPKIDVDPVDGYVIESELTQWNLHQSRREVLHRTEREMEVHDRNKDGFVSFAEYEAPSWVKNSDNDSFGYDMGWWKEGHFNASDADGDGLLNITEFNDFLHPADTNNPKLLLWLCKEEIRERDSDRDGKVNFKEFFHGLFDLVRDYDEGGHNSSNESDDSVEAPAKTLFTQLDKDGDGYLSDVELLPIIGKIHPSEHYYAKQQAEYILQQADTDKDGRLTLTEMIENPYVFYSAVFDEDEDDDYGYHDEFR	34|-	3.1|-	3|-	1|-	1|-	1|-	1|-	---	-	1	-	-	-	---	-	-	-	-	-	---	-	1	-	-	-	---	-	-	-	-	-	CL921.Contig10_All	83.64	1e-78	gi|147767808|emb|CAN69014.1|	hypothetical protein VITISV_032830 [Vitis vinifera]	30.43	3e-06	sp|P62759|NCALD_TAEGU	Neurocalcin-delta OS=Taeniopygia guttata GN=NCALD PE=2 SV=2	83.64	1e-77	A5AGW1	A5AGW1_VITVI Putative uncharacterized protein OS=Vitis vinifera GN=VITISV_032830 PE=4 SV=1	-
178	CL4796.Contig2_All	252 1973 zeta-carotene desaturase [Helianthus annuus]	74583	AAAAAAAASLCFPANGNRAHFRIRSSTNQLKRPRRLTVRSDLDSNVSDMRVNAPKGLFPPEPEHYRGPKLKVVIIGAGLAGMSTAVELLDQGHEVDIYESRSFIGGKVGSFVDKQGNHIEMGLHVFFGCYNNLFRLMKKVGADKNLLVKDHTHTFVNKGGEIGELDFRFPIGAPLHGIRAFLTTNQLETYDKARNAVALALSPVVRALVDPDGAMRNIRDLDNISFSEWFMSKGGTRKSIQRMWDPVAYALGFIDCDNISARCMLTIFSLFATKTEASLLRMLKGSPDVYLSGPIKKYIMDKGGRFHLRWGCREILYDRSADGGVYVTGLAMSKATQKKTVKADAYVAACDVPGIKRLLPQNWRESQFFDNIYKLVGVPVVTVQLRYNGWVTELRDLER…	-|35	-|2.3	-|1	-|1	-|1	-|1	-|1	-	---	-	1	-	-	-	---	-	1	-	-	-	---	-	1	-	-	-	---	-	1	-	-	CL4796.Contig2_All	97.3	4e-58	gi|94481230|dbj|BAE94032.1|	ze-ta-carotene desaturase [Diospyros kaki]	89	0	sp|Q9SE20|ZDS_SOLLC	Zeta-carotene desaturase, chloroplastic/chromoplastic OS=Solanum lycopersicum GN=ZDS PE=2 SV=1	94.07	4e-69	E8ZCJ7	E8ZCJ7_HELAN Z-carotene desaturase (Fragment) OS=Helianthus annuus GN=zdes PE=4 SV=1	slr0940
179	Unigene30612_All	25 2007 PREDICTED: pentatricopeptide repeat-containing protein At3g49240-like [Vitis vinifera]	90182	MALSKPSLLNHLTKTLTKPRRLQSHAPPATFLPIRLFSFATPEEAAAERRKRKRRLRIEPPLTALRHQQQQQPRPSPSPAPQNPNAPKVPEPVSALSGNRLNLHNRILKLIRENDLEEAALLTRHSIYSNCRPTIYTCNAVMAAQLRQSKYSELLSLHRFITQAGVAANVITHNLLLTVYLDCRKTDLALEQYKQLTNDAPFNPSPTTYRVLIKGLVDNQQVEKALELKDEMGTKGFKPDPTIYSYLMLGQAKNSNAEGVFELYEELKQKMGTDEILDGVIYGNLMKGYFLKGMETEAMELCKRVLGEGSLIKMSAVAYNYILEALSKNGKFEEALKVFDRMKNEHDPPRKLSVNLGSYNIVVDGYCAEKRFSDAIEVFNSMGEKRCSPDTLSFNVLID…	-|19	-|1.4	-|-	-|1	-|1	-|1	-|1	-	---	-	-	-	-	-	---	-	-	-	-	-	---	-	-	-	-	-	---	-	-	-	-	Unigene30612_All	68.1	0	gi|460378411|ref|XP_004234966.1|	PREDICTED: pentatricopeptide repeat-containing protein At3g49240-like [Solanum lycopersicum]	59.67	2e-180	sp|Q9M3A8|PP273_ARATH	Pentatricopeptide repeat-containing protein At3g49240 OS=Arabidopsis thaliana GN=EMB1796 PE=2 SV=1	65.6	0	F6H780	F6H780_VITVI Putative uncharacterized protein OS=Vitis vinifera GN=VIT_16s0098g01840 PE=4 SV=1	-
180	CL1839.Contig1_All	138 620 minus strand chloroplast elongation factor TuA (EF-TuA) [Nicotiana sylvestris]	20255	MASVASAATAAAVAKLTYVSTTPSLPNPTSSTPAKVILSSSFTPSSTTLFLQPTARAPRSLRRFSVRAARGKFERKKPHVNIGTIGHVDHGKTTLTAALTMALASLGNSAPKKYDEIDAAPEERARGITINTATVEYETENRHYAHVDCPGHADYVKNMIT	542|481	29.8|29.8	-|-	15|14	15|14	3|3	3|3	0.725	1.299	13	11	-	-	1.347	1.095	8	10	-	-	1.252	0.834	13	11	-	-	1.409	1.194	8	10	-	-	CL1839.Contig1_All	99	6e-45	gi|460391817|ref|XP_004241515.1|	PREDICTED: elongation factor TuA, chloroplastic-like [Solanum lycopersicum]	98	1e-45	sp|Q43364|EFTUB_NICSY	Elongation factor TuB, chloroplastic OS=Nicotiana sylvestris GN=TUFB PE=2 SV=1	98	2e-43	I1K051	I1K051_SOYBN Uncharacterized protein OS=Glycine max GN=Gma.23178 PE=4 SV=1	all4337
181	CL1260.Contig2_All	64 1452 unknown [Populus trichocarpa]	63122	SFLFLVLFLSFFFAKTLASDMSIISYDEKHNFVKNEPGLRSHGEMISMYESWMVKHGKSYNALGEKEKRFEIFKDNLRYIDEQNALANRTYKLGLNRFADLTNDEYRKTYLGTRTDAKRRLSKVRSDRYEPKVGDSLPDSVDWRKKGAVAAIKDQGSCGSCWAFSTIASVEGINQIVTGDLVELSEQELVDCDTSYDEGCNGGLMDYAFQFIIKNGGIDSEKDYPYTGRDGRCDTFRKNAKVVSIDSYEDVPVNNENALKKAVANQPVSVAIEAGGRDFQLYQSGIFNGKCGLDLDHGVNAVGYGSENGKDYWIVRNSWGPSWGEKGYIRMQRNVAAKSGLCGIAIEPSYPTKTGENPPNPGPSPPSPVAPPSVCDDYYECPESTTCCCVYEYANYCFA…	301|299	7.6|7.6	1|1	9|7	9|7	2|2	2|2	0.741	0.854	8	6	-	-	1.459	1.235	7	6	-	-	0.955	0.917	8	6	-	-	1.33	0.851	7	6	-	-	CL1260.Contig2_All	77.88	0	gi|146216004|gb|ABQ10204.1|	cysteine protease Cp6 [Actinidia deliciosa]	78.57	7e-13	sp|P32956|CYSP3_CARCN	Cysteine proteinase 3 (Fragment) OS=Carica candamarcensis PE=1 SV=1	77.88	0	A5HIJ6	A5HIJ6_ACTDE Cysteine protease Cp6 OS=Actinidia deliciosa PE=2 SV=1	AF1946_2
182	Unigene24690_All	49 231 minus strand hypothetical protein VITISV_027576 [Vitis vinifera]	8718	EPTSFTQAQKSPQWRQAMCEEFDALVHNHTWSLVPPHPSQNIVGCKWIYKIKRNPDGPISR	14|-	14.8|-	-|-	1|-	1|-	1|-	1|-	---	-	-	-	-	-	---	-	-	-	-	-	---	-	-	-	-	-	---	-	-	-	-	-	Unigene24690_All	67.21	7e-19	gi|147858489|emb|CAN83506.1|	hypothetical protein VITISV_027576 [Vitis vinifera]	55.74	5e-13	sp|P92520|M820_ARATH	Uncharacterized mitochondrial protein AtMg00820 OS=Arabidopsis thaliana GN=AtMg00820 PE=4 SV=1	67.21	9e-18	A5BRC3	A5BRC3_VITVI Putative uncharacterized protein OS=Vitis vinifera GN=VITISV_027576 PE=4 SV=1	-
183	CL11075.Contig4_All	131 1954 minus strand PREDICTED: H/ACA ribonucleoprotein complex subunit 4 [Vitis vinifera]	95091	MADVQLSHPEKTKKKKSKSKEEDENDAVDFLIKPQSYTPAIDTSQWPILLKNYDKLNVRTGHYTPLPSGYSPLKRPLTEYIKYGILNLDKPANPSSHEVVAWIKRILRVEKTGHSGTLDPKVTGNLIVCIDRATRLVKSQQGAGKEYVCVARLHSKVPEVSKVARALETLTGAVFQRPPLISAVKRQLRIRTIYESKLLEYDVDRHLVVFWISCEAGTYVRTMCVHLGLLLGVGGHMQELRRVRSGILGEKDNMVTMHDVMDGQWVYDNYRDESYLRRVIMPLEVILTSYKRLVVKDSAVNAICYGAKLMIPGLLRFENDIEVGEEVVLMTTKGEAIALGIAEMTTAVIATCDHGTVAKIKRVVMDRDTYPRKWGLGPRASMKKKLVAEGKLDKHGKPN…	-|55	-|2.1	-|-	-|1	-|1	-|1	-|1	-	---	-	-	-	-	-	---	-	-	-	-	-	---	-	-	-	-	-	---	-	-	-	-	CL11075.Contig4_All	92.34	2e-128	gi|255619323|ref|XP_002540014.1|	centromere/microtubule binding protein cbf5, putative [Ricinus communis] >gi|223500118|gb|EEF22369.1| centromere/microtubule binding protein cbf5, putative [Ricinus communis]	87.68	0	sp|Q9LD90|CBF5_ARATH	H/ACA ribonucleoprotein complex subunit 4 OS=Arabidopsis thaliana GN=CBF5 PE=1 SV=1	91.39	0	B9H9F7	B9H9F7_POPTR Predicted protein OS=Populus trichocarpa GN=POPTRDRAFT_865471 PE=4 SV=1	YLR175w
184	CL2816.Contig11_All	198 1400 Hop-interacting protein THI032 [Solanum lycopersicum]	51027	MDYVNGPGRNHLFVPGPVNIPEQVIRAMNRNNEDYRSPAVPALTKILLEDVKKIFKTTSGTPFLIPTTGTGAWESALTNTLSPGDRIVSFLIGQFSLLWIDQQQRLNFNVDVVESDWGQGANLDVLASKIAEDNAHTIKAICIVHNETATGVTNNLATVRKILDHYQHPALFLVDGVSSICALDFRMDEWGIDVALTGSQKALSLPTGMGIVCASPKALEATKTAKSVRVFFDWNDYLKFYKLGTYWPYTPSIQLLYGLRAGLDLIFEEGLDNVIARHGRLAKATRLAVEAWGLKNCTQKEEWYSDTVTAVIVPSYIDSSEIVRRAWKRYNLSLGLGLNKVAGKVFRIGHLGNLNELQLLGCLAGVEMVLKDVGYPVKLGSGVAAASAYLHNSTPMIPS…	326|-	15.0|-	3|-	10|-	10|-	5|-	5|-	0.645	-	7	-	-	-	1.548	-	3	-	-	-	1.135	-	6	-	-	-	1.827	-	4	-	-	-	CL2816.Contig11_All	96.47	3e-43	gi|156712240|emb|CAM59867.2|	alanine:glyoxylate aminotransferase [Lathraea squamaria]	87.78	0	sp|Q56YA5|SGAT_ARATH	Serine--glyoxylate aminotransferase OS=Arabidopsis thaliana GN=AGT1 PE=1 SV=2	92.77	0	G8Z261	G8Z261_SOLLC Hop-interacting protein THI032 OS=Solanum lycopersicum PE=2 SV=1	mlr1322
185	CL10468.Contig3_All	2 754 minus strand cutin-deficient 1 protein [Solanum lycopersicum]	28855	ISESIGGRESPLPYLSPALNGPRLLVGANFASAGVGILNDTGVQFVNIIRISQQLAYFGQYQQRVSALIGVEESQRLVNQALVLITLGGNDFVNNYYLVPFSARSRQFALPDYVRYLISEYQKILLRLYDLGARRVLVTGTGPLGCVPAELAMRSRNGECSTELQRAAALFNPQLTQLLLRLNSQLGSNVFIAANTQLMNNDFIRNPQSFGFITSKVACCGQGPYNGLGLCTQLSNLCPNRDVYAFWDPFH	159|187	14.3|6.0	-|-	5|5	4|5	3|1	2|1	0.402	0.965	2	4	-	-	1.323	1.701	3	3	-	-	2.652	1.717	2	3	-	-	1.769	2.436	3	4	-	*	CL10468.Contig3_All	83.06	4e-50	gi|255634220|gb|ACU17474.1|	unknown [Glycine max]	75.7	2e-103	sp|Q8LB81|GDL79_ARATH	GDSL esterase/lipase At5g33370 OS=Arabidopsis thaliana GN=At5g33370 PE=2 SV=1	83.06	4e-49	C6T6N2	C6T6N2_SOYBN Putative uncharacterized protein (Fragment) OS=Glycine max PE=2 SV=1	-
186	Unigene19931_All	261 3833 minus strand predicted protein [Populus trichocarpa] >gi|222870771|gb|EEF07902.1| predicted protein [Populus trichocarpa]	174526	MFTPQKKLWSLTPRSEPGQKNGSVSGPGSGSNTNPISPRNGESLAKGKAVAFLQGDGIMDQESLTERVSKLENELFEYQYNMGLLLIEKKEWTLKYEELRQALADATDTLKREQAAHSSAMSEVEKREENLKKALGVERQCVLDLEKALREMRSEYAEIKFNADSKLAEANALITSIEEKSLEVESKFHAADAKLAEVSRKSSEIERKLHELVAQENSLRRERSFFNTEREAHDTAISKQREDLREWERKLQETEERLADGRRLLNQREERANENDKIWKEKQNDLEELRKKIEIANSTLKNKEDDISSRLASVALKEKEADDVRKRLEEKEKQLLELEEKLNAREKLEIQKLLDEHNSILAEKQKEFELEMEQKRKLNDEQLKNKVTEVEKKEAEITH…	-|54	-|1.2	-|-	-|1	-|1	-|1	-|1	-	---	-	1	-	-	-	---	-	-	-	-	-	---	-	1	-	-	-	---	-	-	-	-	Unigene19931_All	66.6	1e-151	gi|296087303|emb|CBI33677.3|	unnamed protein product [Vitis vinifera]	30.92	1e-62	sp|Q9FLH0|NMCP_ARATH	Putative nuclear matrix constituent protein 1-like protein OS=Arabidopsis thaliana GN=At5g65770 PE=2 SV=1	57.44	0	F6HSF7	F6HSF7_VITVI Putative uncharacterized protein OS=Vitis vinifera GN=VIT_14s0006g03280 PE=4 SV=1	-
187	CL11342.Contig1_All	78 785 predicted protein [Populus trichocarpa] >gi|222852783|gb|EEE90330.1| predicted protein [Populus trichocarpa]	31764	MLGPQCTENPPTLSSTCGAGNIQEIGGLQTYVTGDQDSKLAILLVSDAFGYEAPKLRKLADKVAASGFLVVVPDFFYGDPFTPEKPRESWKNAHSPDKGCEDAKTIVSALKSKGVSKIGAAGFCWGGMVAVRLAKFDCIDAAVLLHPGPITVEEINEVKTPIAILGAEIDNYAPPELVKQLGEILSAKAEVDSFVKIFPGVGHGWTVRYNDDDEFAVKSAQESHLDLLNWLTKYIK	-|22	-|8.5	-|1	-|1	-|1	-|1	-|1	-	---	-	-	-	-	-	---	-	-	-	-	-	---	-	-	-	-	-	---	-	-	-	-	CL11342.Contig1_All	68.91	3e-90	gi|460367184|ref|XP_004229455.1|	PREDICTED: endo-1,3;1,4-beta-D-glucanase-like [Solanum lycopersicum]	43.52	4e-37	sp|Q9ZT66|E134_MAIZE	Endo-1,3;1,4-beta-D-glucanase OS=Zea mays PE=1 SV=1	67.23	2e-86	F6HDK7	F6HDK7_VITVI Putative uncharacterized protein OS=Vitis vinifera GN=VIT_05s0020g02550 PE=4 SV=1	YAL049c
188	Unigene3344_All	160 765 PREDICTED: beta-galactosidase 17-like [Vitis vinifera] >gi|297743091|emb|CBI35958.3| unnamed protein product [Vitis vinifera]	26958	MARNRSLRRTTAKIFIFLIFLIVLGAFAPLPSALHHSSQFHLDKGDEQKFEIAKDMFWKDGEPFRIIGGDLHYFRVHPEYWEDRLLRAKALGLNTIQTYVPWNLHEPRQGHLVFEGIADIISFLKLCKKLDLLVMLRAGPYICGEWDLGGFPAWLLAEEPAIRLRSSDPAFLDLVEKWWGILLPKVSPLLYSNGGPIIMVQV	-|18	-|4.0	-|-	-|1	-|1	-|1	-|1	-	---	-	-	-	-	-	---	-	-	-	-	-	---	-	-	-	-	-	---	-	-	-	-	Unigene3344_All	83.23	1e-75	gi|359482520|ref|XP_002280228.2|	PREDICTED: beta-galactosidase 17-like [Vitis vinifera] >gi|297743091|emb|CBI35958.3| unnamed protein product [Vitis vinifera]	72.25	6e-71	sp|Q93Z24|BGA17_ARATH	Beta-galactosidase 17 OS=Arabidopsis thaliana GN=BGAL17 PE=2 SV=1	83.23	1e-74	D7U012	D7U012_VITVI Beta-galactosidase OS=Vitis vinifera GN=VIT_09s0002g02290 PE=3 SV=1	XF0840
189	CL7815.Contig3_All	368 1387 minus strand predicted protein [Populus trichocarpa] >gi|118489552|gb|ABK96578.1| unknown [Populus trichocarpa x Populus deltoides] >gi|222856142|gb|EEE93689.1| predicted protein [Populus trichocarpa]	47410	MDHAADAHRTDLMTLTRYVLNEQSKHPESRGDFTILLNHIVLGCKFVCSAVNKAGLAKLIGLAGETNVQGEEQKKLDVLSNEVFIKALVSSGRTCILVSEEDEEATFVEPSKRGKYCVVFDPLDGSSNIDCGVSIGTIFGIYVINDGDEPKLEDVLQPGKKLLAAGYCMYGSSCMLVLSTGKGVNGFTLDPSLGEFILTHPDIKIPKKGKIYSVNEGNAKNWDGPTAKYVEKCKFPKDGSPAKSLRYIGSMVADVHRTLLYGGIFLYPADKKSPNGKLRVLYEVFPMSFLMEQAGGQAFTGKQRALDLVPKKIHERSPIFLGSYDDVEEIKALYAAEEQK	200|-	17.6|-	-|-	9|-	9|-	5|-	5|-	1.49	-	6	-	-	-	0.854	-	6	-	-	-	1.046	-	6	-	-	-	1.056	-	6	-	-	-	CL7815.Contig3_All	94.44	2e-24	gi|255579230|ref|XP_002530461.1|	fructose-1,6-bisphosphatase, putative [Ricinus communis] >gi|223530006|gb|EEF31931.1| fructose-1,6-bisphosphatase, putative [Ricinus communis]	90	0	sp|Q9MA79|F16P2_ARATH	Fructose-1,6-bisphosphatase, cytosolic OS=Arabidopsis thaliana GN=At1g43670 PE=2 SV=1	92.75	0	A6N9A0	A6N9A0_FLALI Fructose-1,6-bisphosphatase (Fragment) OS=Flaveria linearis PE=2 SV=1	YLR377c
190	CL3436.Contig2_All	296 883 minus strand predicted protein [Populus trichocarpa] >gi|222858897|gb|EEE96444.1| predicted protein [Populus trichocarpa] >Unigene891_All 245 832 minus strand predicted protein [Populus trichocarpa] >gi|222858897|gb|EEE96444.1| predi	31734	MAEEEAKKVEPEACSEPPPSDPPAAEPVEAPKDVAEEKTIIPPPAEEKADDSKALAIVEKPEAVEEKKPEGSIDRDAVLARVATEKRLSLIKAWEESEKSKAENKAQKKISAIGAWENSKKASLEAELKKIEEQLEKKKAEYIEKMKNKVALVHKAAEEKRAMVEARRGEDLLKAEEIAAKYRATGTAPKKLLGCF	127|72	17.9|17.9	-|-	8|6	8|6	3|3	3|3	0.299	0.4	4	3	*	*	1.377	1.939	3	3	-	*	0.943	0.474	4	3	-	*	0.202	0.363	3	3	*	-	CL3436.Contig2_All	82.54	2e-34	gi|449461293|ref|XP_004148376.1|	PREDICTED: remorin-like [Cucumis sativus]	81.13	3e-40	sp|P93788|REMO_SOLTU	Remorin OS=Solanum tuberosum PE=1 SV=1	82.54	9e-32	G8A207	G8A207_MEDTR Remorin OS=Medicago truncatula GN=MTR_128s0001 PE=4 SV=1	-
191	CL7791.Contig1_All	176 1105 putative pyridoxine biosynthesis protein isoform A [Nicotiana tabacum] >gi|46399271|gb|AAS92256.1| putative pyridoxine biosynthesis protein isoform B [Nicotiana tabacum]	37438	MAGSGVVTVYGNGAITETTKQSPFSVKVGLAQMLRGGVIMDVVTPEQARVAEEAGACAVMALERVPADIRAQGGVARMSDPQLIKEIKQAVTIPVMAKARIGHFVEAQILEAIGIDYVDESEVLTLADDENHINKHNFRIPFVCGCRNLGEALRRIREGAAMIRTKGEAGTGNIIEAVRHVRSVMGDIRVLRNMDDDEVFTFAKKIQAPYDLVMQTKQLGRLPVVHFAAGGVATPADAALMMQLGCDGVFVGSGVFKSGDPARRARAIVQAVTHYSDPEVLADVSCGLGEAMVGINLNDDKVERYASRSE	387|172	14.8|12.6	-|-	14|8	14|8	4|3	4|3	1.084	0.704	12	7	-	-	1.828	0.805	7	5	*	-	0.608	1.152	10	7	*	-	1.231	0.732	7	5	-	-	CL7791.Contig1_All	97.96	1e-92	gi|154259498|gb|ABS72029.1|	putative SNZ1 protein [Olea europaea]	93.87	3e-152	sp|Q39963|PDX1_HEVBR	Probable pyridoxal biosynthesis protein PDX1 OS=Hevea brasiliensis GN=PDX1 PE=2 SV=1	95.16	6e-154	Q6QND3	Q6QND3_TOBAC Putative pyridoxine biosynthesis protein isoform A OS=Nicotiana tabacum GN=Pdx1-B PE=3 SV=1	SPAC29B12.04
192	Unigene11648_All	216 1454 hypothetical protein VITISV_040122 [Vitis vinifera]	53562	MAGMTPEGSQFDARQFDSKMNELLGTDGEEFFTSYDEVYDSFDAMGLQENLLRGIYAYGFEKPSAIQQRGIVPFCKGLDVIQQAQSGTGKTATFCSGILQQLDYNIVECQALVLAPTRELAQQIEKVMRALGDYLGVKVHACVGGTSVREDQRILSSGVHVVVGTPGRVFDMLRRQSLRPDYIKMFVLDEADEMLSRGFKDQIYDIFQLLPPKIQVGVFSATMPPEALEITRKFMNKPVRILVKRDELTLEGIKQFYVNVEKEEWKLETLCDLYETLAITQSVIFVNTRRKVDWLTDKMRSRDHTVSATHGDMDQNTRDIIMREFRSGSSRVLITTDLLARGIDVQQVSLVINYDLPTQPENYLHRIGRSGRFGRKGVAINFVTKDDDRMLFDIQKFYN…	255|423	23.7|21.3	3|3	19|19	17|3	9|7	7|1	1.198	1.007	11	2	-	-	0.928	1.895	10	2	-	-	0.771	0.917	10	2	-	-	0.949	1.723	11	2	-	-	Unigene11648_All	98.97	1e-168	gi|386870481|gb|AFJ42571.1|	elongation initiation factor 4A [Sesamum indicum]	97.23	5e-144	sp|Q40469|IF4A6_TOBAC	Eukaryotic initiation factor 4A-6 (Fragment) OS=Nicotiana tabacum PE=2 SV=1	96.85	0	A5BNE8	A5BNE8_VITVI Putative uncharacterized protein OS=Vitis vinifera GN=VITISV_040122 PE=3 SV=1	SPAC1006.07
193	CL4101.Contig1_All	196 1227 enoyl-CoA-hydratase [Avicennia marina]	46116	MVSRLLELFLACAEDSSVKLIMLKGKGRAFCAGGDVAAVVRDINQGNWKSGANYFRKEFTMNYVMATYSKPQVSILNGIAMGGGAGASIHGRFRIATENSLFAMPETALGLFPDVGASYFLSRLPGFFGEYVGLTGTRLDGAEMLACGLATHFVRSERLPLLEEALVKADSSVPAVISSIIGEFSQIPNLKKNSSYHRLNIINKCFSRRTIEEIIAALEREAAEKKDDWISSTIQSLKKASPMSLKISLRSIREGRLQGIGKCLVREFRMVCHVMQGEISKDFIEGCRAILLDKDRNPKWEPSKVELISDKMVDRYFSKVNDDDWEDLKLSVRSNLPAYAIAKL	-|57	-|2.9	-|1	-|2	-|2	-|1	-|1	-	0.799	-	2	-	-	-	---	-	1	-	-	-	0.767	-	2	-	-	-	---	-	1	-	-	CL4101.Contig1_All	87.21	7e-156	gi|6014701|gb|AAF01467.1|AF190450_1	enoyl-CoA-hydratase [Avicennia marina]	72.97	9e-131	sp|Q9LKJ1|HIBC1_ARATH	3-hydroxyisobutyryl-CoA hydrolase 1 OS=Arabidopsis thaliana GN=CHY1 PE=1 SV=1	87.21	8e-155	Q9SE41	Q9SE41_AVIMR Enoyl-CoA-hydratase OS=Avicennia marina PE=2 SV=1	BMEI1196
194	Unigene13013_All	151 1623 minus strand glutaredoxin, grx, putative [Ricinus communis] >gi|223541716|gb|EEF43264.1| glutaredoxin, grx, putative [Ricinus communis]	66643	GGAVKEVKSRAELDKTVSEGTPVVLHFWASWCEASKHMDQVFSHLSTDFPLARFLRVEAEEQPEISEAYSVSAVPYFVFIKDGKAVDTLEGADPSSLANKVAKVAGSIRPGEPAAPASLGMAAGPTVLETVKEFAKENGASQYGSQLPSGIGDELRKRIQQLVNSHPIMLFMKGSPESPKCGFSQKVVDILKKEKVKFGSFDILTDNEVREGLKKHANWPTFPQLYCKGELLGGCDIAIAMHESGELGEVFRDHGIEISDSDEGKHIEPDGGKGGIFEPSGLSAATSDRLRGLINSGPVMLFMKGKPDEPRCGFSRKVVDILRQEKVKFESFDILIDDEVRQGLKVYSNWSSYPQLYIKGELIGGSDIVLEMQKSGELKTVLAEKGIPFGETIENRLKQ…	50|50	2.6|6.5	-|-	1|2	1|2	1|2	1|2	---	1.159	1	2	-	-	---	---	-	1	-	-	---	1.1	1	2	-	-	---	---	-	1	-	-	Unigene13013_All	84.9	2e-91	gi|388503922|gb|AFK40027.1|	unknown [Lotus japonicus]	72.36	0	sp|Q9ZPH2|GRS17_ARATH	Monothiol glutaredoxin-S17 OS=Arabidopsis thaliana GN=GRXS17 PE=2 SV=1	84.88	4e-97	A9PES4	A9PES4_POPTR Putative uncharacterized protein OS=Populus trichocarpa PE=2 SV=1	SPBC26H8.06_2
195	Unigene969_All	226 1221 chloroplast PsbO4 precursor [Nicotiana benthamiana]	44442	MATSLQAAATLMQPTKVGVSARSSLQLRSVQSVGKSFGVEPAGARLTCSLQADLKDLAQKCTDAAKIAGFALATSALVVSGANAEGVPKRLTYDEIQSKTYLEVKGTGTANQCPTIDGGVDSFAFKPGKYNAKKICLEPTSFTVKAEGVNKNAPPEFQKTKLMTRLTYTLDEIEGPFEVSQDGTVKFEEKDGIDYAAVTVQLPGGERVPFLFTIKQLVASGKPESFGGEFLVPSYRGSSFLDPKGRGGSTGYDNAVALPAGGRGDEEELEKENIKNVASSTGKITLSVTKSKPETGEVIGVFESIQPSDTDLGSKAPKDVKIQGIWYAQLDS	11922|11478	59.0|60.5	1|1	356|376	356|376	16|16	16|16	0.777	0.851	251	248	-	-	0.66	0.719	218	206	-	-	1.515	1.453	246	234	-	-	0.745	0.828	221	214	-	-	Unigene969_All	93.55	1e-09	gi|32363253|sp|P83504.1|PSBO_BRARA	RecName: Full=Oxygen-evolving enhancer protein 1, chloroplastic; Short=OEE1	93.55	4e-10	sp|P83504|PSBO_BRARA	Oxygen-evolving enhancer protein 1, chloroplastic (Fragment) OS=Brassica rapa GN=PSBO PE=1 SV=1	93.49	4e-87	A9PHI5	A9PHI5_POPTR Putative uncharacterized protein OS=Populus trichocarpa PE=2 SV=1	-
196	Unigene16670_All	178 1338 PREDICTED: uroporphyrinogen decarboxylase, chloroplastic-like [Vitis vinifera] >gi|297736517|emb|CBI25388.3| unnamed protein product [Vitis vinifera]	51367	MACIYSSSVSSISAKLNFTSLSNHKPRFFCSLGGAVAEPKAVNATEPLLLNAARGKEVERPPVWLMRQAGRYMKSYQILCEKYPSFRERSENVDLVVEISLQPWEVFKPDGVILFSDILTPLTGMNIPFDIVKGKGPIIFDPIRTDADVEKVREFTPDESVPYVGEALTILRKEVNNEAAVLGFVGAPFTLASYVVEGGSSKHFSKIKRLAFSEPKVLHALLQKFATSMAKYIQYQADKGAQAVQIFDSWATELSPVDFEEFSLPYLKQIVDTVKRTHPDLPLILYASGSGGLIERLPLTGVDVVSLDWTVDMAEGRKRLGPNVAVQGNVDPGVLFGSKEFITDRIKDTVRKAGKGKHILNLGHGIVVGTPEENVAHFFEVAKGLRY	686|543	21.2|26.6	-|-	21|23	21|23	5|6	5|6	0.783	0.787	14	15	-	-	0.963	1.022	13	16	-	-	1.426	1.386	14	13	*	-	1.147	1.668	13	18	-	-	Unigene16670_All	93.94	2e-11	gi|305855763|gb|ADM67722.1|	putative uroporphyrinogen decarboxylase [Rhododendron ovatum] >gi|305855765|gb|ADM67723.1| putative uroporphyrinogen decarboxylase [Rhododendron ellipticum] >gi|305855767|gb|ADM67724.1| putative uroporphyrinogen decarboxylase [Rhododendron mariesii] >gi|305855769|gb|ADM67725.1| putative uroporphyrinogen decarboxylase [Rhododendron nakaharae] >gi|305855771|gb|ADM67726.1| putative uroporphyrinogen …	86.67	4e-169	sp|Q42855|DCUP_HORVU	Uroporphyrinogen decarboxylase (Fragment) OS=Hordeum vulgare GN=DCUP PE=2 SV=1	91.19	1e-80	A9PGQ3	A9PGQ3_POPTR Putative uncharacterized protein OS=Populus trichocarpa PE=2 SV=1	slr0536
197	CL8683.Contig1_All	1 378 minus strand uncharacterized protein LOC100499738 [Glycine max] >CL8683.Contig2_All 1 378 minus strand uncharacterized protein LOC100499738 [Glycine max]	17036	AAANFTRGELATALRKNPYMVNIILAGYDKETGPSLYYIDYIASLHKLDKAAFGYGSYFALSMMDRHYRRDMTVEEAIELVDKCIVEIRTRLVVAPPNFLIKIVDKDGAREYAWRESIKDAPVPAA	39|54	8.7|8.7	-|-	2|2	2|2	1|1	1|1	---	1.233	1	2	-	-	---	1.299	1	2	-	-	---	1.055	1	2	-	-	---	1.664	1	2	-	-	CL8683.Contig1_All	92.86	6e-25	gi|14594929|emb|CAC43325.1|	putative beta4 proteasome subunit [Nicotiana tabacum]	84.17	5e-58	sp|O23714|PSB2A_ARATH	Proteasome subunit beta type-2-A OS=Arabidopsis thaliana GN=PBD1 PE=1 SV=1	92.86	8e-24	Q93X32	Q93X32_TOBAC Putative beta4 proteasome subunit (Fragment) OS=Nicotiana tabacum GN=b4 PE=2 SV=1	SPAC31A2.04c
198	Unigene1493_All	68 328 minus strand unknown [Populus trichocarpa] >gi|118489953|gb|ABK96773.1| unknown [Populus trichocarpa x Populus deltoides]	11484	MDGHDADNSKQSTADMTAFVQNLLQQMQTRFQTMSESIICKIDEMGNRIDELEQSINDLRAEMGQEGSPSPSAPSKAKEEPKSAEDS	48|-	13.8|-	2|-	2|-	2|-	1|-	1|-	1.934	-	2	-	-	-	---	-	-	-	-	-	---	-	1	-	-	-	---	-	1	-	-	-	Unigene1493_All	92.54	1e-29	gi|460366639|ref|XP_004229188.1|	PREDICTED: heat shock factor-binding protein 1-like [Solanum lycopersicum]	50.82	2e-10	sp|Q5RDI2|HSBP1_PONAB	Heat shock factor-binding protein 1 OS=Pongo abelii GN=HSBP1 PE=3 SV=1	86.57	6e-27	A9PBT9	A9PBT9_POPTR Putative uncharacterized protein OS=Populus trichocarpa PE=4 SV=1	-
199	CL9061.Contig3_All	280 1773 glutamate decarboxylase [Panax ginseng]	67752	MVLSKTSSQTDVSVNSTFASRYVRDSLPRFKMSENSIPKEAAYQIINDELMLDGNPRLNLASFVTTWMEPECDKLIMAAINKNYVDMDEYPVTTELQNRCVNMIAHLFNAPLGDGEAAVGVGTVGSSEAIMLAGLAFKRKWQKKMKELGKPYDKPNIVTGANVQVCWEKFARYFEVELKEVKLRDDYYVMDPEKAVEMVDENTICVAAILGSTLNGEFEDVKRLNDLLVEKNKQTGWDTPIHVDAASGGFIAPFLYPELEWDFRLPLVKSINVSGHKYGLVYAGIGWVIWRSKEDLPEELIFHINYLGADQPTFTLNFSKGSSQVIAQYYQLIRLGYEGYRNIMENCQENAKVLKEGLERTGRFNIVSKDNGVPLVAFSFKDNSRHNEFEVSDMLRRYG…	200|156	16.3|10.0	-|-	8|4	8|4	7|4	7|4	1.598	1.136	4	3	-	-	1.563	---	3	1	-	-	0.935	0.973	4	3	-	-	2.556	---	3	1	-	-	CL9061.Contig3_All	92.78	6e-47	gi|449533116|ref|XP_004173523.1|	PREDICTED: glutamate decarboxylase-like, partial [Cucumis sativus]	84.8	0	sp|Q07346|DCE_PETHY	Glutamate decarboxylase OS=Petunia hybrida GN=GAD PE=1 SV=1	91.29	7e-154	B9S7C2	B9S7C2_RICCO Glutamate decarboxylase, putative OS=Ricinus communis GN=RCOM_0776270 PE=3 SV=1	sll1641
200	CL4582.Contig1_All	171 1031 PREDICTED: uncharacterized protein LOC100261604 isoform 1 [Vitis vinifera] >gi|359479224|ref|XP_003632237.1| PREDICTED: uncharacterized protein LOC100261604 isoform 2 [Vitis vinifera] >gi|296084017|emb|CBI24405.3| unnamed protein product	35269	MRRQGGHYGGDSGGGDGGNHAYGGGASAQMHQQHSNSKSGYYQGRHQEQQPLGEKEGGQHNNQWRWERDGAQDKLPQTAMSPTAPFSEGQGRETPRSYYQSQRLDPRMPLERQGGRDPRSQPHEEDMDIGYEDNRVLLTFEGLEQRFLDDIMKLSKEQTDAEDAENARHRERINAINAQYEEQLFALRTRHASRRDDFLRRESQARQQQYQQIAMEQYPNSSMGLSDPPRGYNAGTVPSGEPHRVYNSDYYDTYRERGRFPGNDRDHRLEPKVRYPRGRSYDTGSRY	-|44	-|3.8	-|2	-|2	-|2	-|1	-|1	-	---	-	1	-	-	-	---	-	1	-	-	-	---	-	-	-	-	-	---	-	-	-	-	CL4582.Contig1_All	60.79	2e-58	gi|470110515|ref|XP_004291526.1|	PREDICTED: uncharacterized protein LOC101307956 [Fragaria vesca subsp. vesca]	-	-	-	-	57.31	1e-60	D7T1M5	D7T1M5_VITVI Putative uncharacterized protein OS=Vitis vinifera GN=VIT_06s0009g00900 PE=4 SV=1	-
201	CL10731.Contig1_All	135 2744 minus strand PREDICTED: puromycin-sensitive aminopeptidase [Vitis vinifera] >gi|296081675|emb|CBI20680.3| unnamed protein product [Vitis vinifera]	115428	QFKGQPRLPKFAIPKRYDLKLKPDVTACKFSGAVQISVNVVSDTKLLVLNAAELSVNPNSVTFNCDNKVLESVEVELFEEDEIVVVEFKESLPIGVGVLNMEFEGTLNDRMKGFYRSTYEHNGEKKNMAVTQFEPADARRCFPCWDEPSCKATFKITLEVPSELVALSNMPVIEEKLNGNLKTVYYQESPIMSTYLVAVVVGLFDYVEDHTPDGIIVRVYCQVGKASQGKFALDVAVKTLVLYKEYFGVPYSLPKLDMVAIPDFAAGAMENYGLVTYRETALLYDDKHSAAANKQRVAIVVAHELAHQWFGNLVTMEWWTHLWLNEGFATWVSYLAADSLFPDWQIWTQFLDESTEGLRLDGLAESHPIEVDINHAGEIDEIFDAISYRKGASVIRMLQ…	47|-	0.9|-	3|-	1|-	1|-	1|-	1|-	---	-	1	-	-	-	---	-	1	-	-	-	---	-	1	-	-	-	---	-	1	-	-	-	CL10731.Contig1_All	84.71	4e-39	gi|297733643|emb|CBI14890.3|	unnamed protein product [Vitis vinifera]	51.76	3e-117	sp|A6NEC2|PSAL_HUMAN	Puromycin-sensitive aminopeptidase-like protein OS=Homo sapiens GN=NPEPPSL1 PE=2 SV=3	76.79	0	D7STT1	D7STT1_VITVI Putative uncharacterized protein OS=Vitis vinifera GN=VIT_04s0008g01430 PE=4 SV=1	YKL157w
202	CL74.Contig1_All	369 1796 PREDICTED: uncharacterized protein LOC100267443 [Vitis vinifera] >CL74.Contig2_All 432 1859 PREDICTED: uncharacterized protein LOC100267443 [Vitis vinifera]	55160	METDQGKLFVGGISWDTNEERLKEYFGAYGEVVEAVIMRDRTTGRARGFGFVVFADPAVAERVVKEKHMIDGRTVEAKKAVPRDDQHLINRNSGSIQGSPGPGRTKKIFVGGLASTVTESDFKNYFDQFGTITDVVVMYDHNTQRPRGFGFITYDSEDAVDGVLHKTFHELNGKMVEVKRAVPKELSPGPNRGPLVGYNYGFSRGNNFLNSYPQGYNLSSLGGYGVRMDGRYNPLASARAGFSHFGSPAYGMGVNMEQRLNAGFGGGSNFSGNVGYGRVLNPYFGNNQSRYNTPIGYNTSSSRGDSFFNSSSRNVWGNGGLNNSANNASSASYFGSGSGGFGVFRNNGSNWGTSPIAASVGGSSSGYGGGNVGYRGGENNYALGAGGFGRNSGTGVVTT…	-|44	-|6.1	-|1	-|2	-|2	-|2	-|2	-	---	-	1	-	-	-	---	-	1	-	-	-	---	-	1	-	-	-	---	-	1	-	-	CL74.Contig1_All	84.29	1e-128	gi|297737532|emb|CBI26733.3|	unnamed protein product [Vitis vinifera]	57.29	6e-64	sp|Q8W034|RNP1_ARATH	Heterogeneous nuclear ribonucleoprotein 1 OS=Arabidopsis thaliana GN=RNP1 PE=1 SV=1	76.61	1e-125	I1JJG3	I1JJG3_SOYBN Uncharacterized protein OS=Glycine max GN=Gma.14137 PE=4 SV=1	SPAC140.02
203	CL5859.Contig1_All	108 1346 unknown [Populus trichocarpa]	51963	MAKPARGRPASPSGSRSGSSSRSRSRSGSDSRSSSRSRSRSRSFSSSSSPSRSGSSRSPSPAPPRKSPREGAKPGRSPPPLAKKSSPPLRKASPIPESLVLHVDQLSRNVNENHLKEIFGNFGEVVNVRLAIDHVVNLPKGFAYVEFKSRADAEKALLYMDGAQVDGKVIRAKFTLPERKKASSPPKTVATSSRRDALKSVNAALDADNPRPKRLREVSPRRKPLSPPRRRSPLARRGSPKQGPDSPPPPRRHADSPVRRRADSPHRRGDSPPPRRRPASPARGRSPASPPRRYRSPPRVSPRRIRGSPVRRRSPLPPRRRSPRRARSPPRRSPVGRRRSRSPVRRPARSPSRSPSPRRGRGPPARRGRLSSYSSSPSPRRAPRRVSRSRSPRRPMRGR…	24|56	2.4|5.1	1|-	2|2	2|1	1|2	1|1	0.008	---	2	1	-	-	---	---	-	1	-	-	---	---	1	1	-	-	---	---	1	1	-	-	CL5859.Contig1_All	75.32	4e-30	gi|357130173|ref|XP_003566725.1|	PREDICTED: uncharacterized protein LOC100830616 [Brachypodium distachyon]	69.11	7e-43	sp|Q9SEE9|SR45_ARATH	Arginine/serine-rich protein 45 OS=Arabidopsis thaliana GN=SR45 PE=1 SV=1	75.32	5e-29	I1HN56	I1HN56_BRADI Uncharacterized protein OS=Brachypodium distachyon GN=BRADI2G39730 PE=4 SV=1	-
204	CL4538.Contig1_All	127 1734 PS60 [Nicotiana tabacum] >CL4538.Contig2_All 127 1734 PS60 [Nicotiana tabacum]	65303	MPLKLAVLFLCFAIVAAENPYRFFTWNVTYGTIYPLGVPQQGILINGQFPGPDIYSVTNDNVIVNVFNSLDEPFLIHWNGVQNRRNSFEDGVYGTTCPIPPGQNFTYILQMKDQIGSFFYFPSLAFHKAAGGFGGIRILSRPLIPVPFDTPTDDYTVLIGDWYKSNHTALKAILDRGKKLPFPDGILINGRGPNVTSFTVQPGKTYRLRICNVGLQNSLNFRIQGHKMKVVEMEGTHTMQISYSSLDIHVGQCMSVLVTADQQPQDYYIVVSTRFTSQILTTTGFLRYANSNRRASGPLPGGPTTQIDWSLNQARSIRTNLTASGPRPNPQGSYHYGMINTSRTIRLASSAGQVNGKQRYALNSVSFVQADTPLKLADYFQISGVFRVGSIPDAPNGRG…	215|185	6.5|3.9	2|2	4|3	4|3	2|1	2|1	1.115	0.993	3	3	-	-	---	1.03	1	3	-	-	0.881	0.884	3	3	-	-	---	0.89	1	3	-	-	CL4538.Contig1_All	82.78	0	gi|1255951|emb|CAA65634.1|	PS60 [Nicotiana tabacum]	58.54	1e-173	sp|Q00624|ASOL_BRANA	L-ascorbate oxidase homolog OS=Brassica napus GN=Bp10 PE=2 SV=1	82.78	0	Q40473	Q40473_TOBAC PS60 protein (Precursor) OS=Nicotiana tabacum GN=PS60 PE=4 SV=1	SPAC1F7.08
205	CL6620.Contig3_All	247 1047 minus strand Photosystem II, 22 kDa Protein [Plantago major] >CL6620.Contig4_All 215 1015 Photosystem II, 22 kDa Protein [Plantago major]	34164	MAQKMLLTANHVAGNVKGLPLLIQRLKPKPFSQFLLPPRTNISPLSSSSATTVALFKSKTKAPAKKAPVVKEKPKVEDGIFGTSGGIGFTKQNELFVGRVAMIGFAASLLGEAITGKGILAQLNLETGIPIYEAEPLLLFFILFNLLGAIGALGDRGRFVDDATGLDKAVIAPGKGFRAALGLGEGGPLFGFTKANELFVGRLAQLGIAFSIIGEIVTGKGALAQLNIETGVPINEIEPLLLFNVAFFFFAAINPGTGKFVTDEEED	1257|1015	21.7|28.5	-|-	35|32	15|15	5|6	1|1	1.006	1.515	14	14	-	*	0.91	1.376	11	9	-	-	0.806	0.644	14	12	*	*	0.587	1.31	10	11	*	-	CL6620.Contig3_All	100	4e-10	gi|93004423|gb|ABE97128.1|	chloroplast PSII associated light-harvesting complex II protein [Solanum lycopersicoides]	85.96	6e-58	sp|Q9XF91|PSBS_ARATH	Photosystem II 22 kDa protein, chloroplastic OS=Arabidopsis thaliana GN=PSBS PE=1 SV=1	100	4e-09	Q1KTH6	Q1KTH6_9SOLN Chloroplast PSII associated light-harvesting complex II protein (Fragment) OS=Solanum lycopersicoides GN=At1g44575 PE=4 SV=1	-
206	CL8569.Contig2_All	322 1887 minus strand monosaccharide transporter 2 [Olea europaea]	65398	MAGGGFGPGPGNGKEYPGNLTPYVIVTCVIAAMGGLIFGYDIGISGGVTSMDPFLEKFFPSVYRKQHADDSTNQYCKFDSVTLTLFTSSLYLAALLSSIVASTVTRKLGRKLSMLFGGVLFCAGALINGFAQAVWMLIVGRILLGFGIGFANQSVPLYLSEMAPYKYRGALNIGFQLSITIGILAANVLNYGFAKIKGGWGWRLSLGGAMVPALIITVGSLILPETPNSMIERGKQDEARTKLKRIRGIANVDEEFNDLVAASEASRKVEHPWRNLLRRKYRPHLTMAIAIPFFQQLTGINVIMFYAPVLFKTIGFGSDAALMSAVITGGVNVLATAVSICGVDKWGRRFLFLEGGIQMLICQIVVAICIGLKFGVDGNPGELPKWYAIVVVLFICVYV…	-|58	-|3.8	-|2	-|1	-|1	-|1	-|1	-	---	-	-	-	-	-	---	-	-	-	-	-	---	-	-	-	-	-	---	-	-	-	-	CL8569.Contig2_All	88.43	0	gi|116294315|gb|ABJ98314.1|	monosaccharide transporter 2 [Olea europaea]	82.91	0	sp|Q41144|STC_RICCO	Sugar carrier protein C OS=Ricinus communis GN=STC PE=2 SV=1	88.43	0	Q00P85	Q00P85_OLEEU Monosaccharide transporter 2 OS=Olea europaea GN=MST2 PE=2 SV=1	L140856
207	Unigene34251_All	131 1840 minus strand protein disulfide isomerase, putative [Ricinus communis] >gi|223530182|gb|EEF32091.1| protein disulfide isomerase, putative [Ricinus communis]	78485	MVMKSLIILSIFLCLICSNISLCASKSEEDEDLSFLEQQEQNDAASLDDAHPYGHPRDYENYDDLEDGELSAYADEDGGYSAPEVDETHVVLLKESNFSEFVEKNRFVMVEFYAPWCGHCQALAPEYAAAAEELKDEAVALAKIDATEEAELSQKFDVQGFPTVYFFVDGVHKLYAGQRTKDAIVTWLKKKIGPGLHNITTIEEAEHILADEDKIILGYLESLVGSESEELAAASKLEDDVSFYQTTSPDVAKLFHIDPHVKRPSLVILKKEAEKLTQFSGQFTKSAIAEFVFENKLPLVTNFTRESAPLVFENPIKKQLILFATSNDAEKFYPIFEEAAKAFKGKLICVYVELDNEDVGKPVSDYFGVSGEAPSVLAYTGNDDSRKFLLDGELTINSI…	73|49	3.2|4.7	-|-	5|2	4|2	2|2	1|2	1.554	---	2	1	-	-	---	---	1	1	-	-	0.569	---	2	1	-	-	---	---	1	1	-	-	Unigene34251_All	77.92	0	gi|297746254|emb|CBI16310.3|	unnamed protein product [Vitis vinifera]	66.18	0	sp|Q8VX13|PDI13_ARATH	Protein disulfide isomerase-like 1-3 OS=Arabidopsis thaliana GN=PDIL1-3 PE=2 SV=1	77.06	0	A9PDC7	A9PDC7_POPTR Putative uncharacterized protein OS=Populus trichocarpa PE=2 SV=1	SPAC1F5.02
208	CL373.Contig22_All	105 221 minus strand unnamed protein product [Vitis vinifera]	4575	QVALNMLREEGLASFYNGLGPSLIGIAPYIAVNFCVFDL	26|-	20.5|-	-|-	2|-	2|-	1|-	1|-	---	-	-	-	-	-	---	-	-	-	-	-	---	-	-	-	-	-	---	-	-	-	-	-	CL373.Contig22_All	97.44	9e-16	gi|326523471|dbj|BAJ92906.1|	predicted protein [Hordeum vulgare subsp. vulgare]	89.74	1e-15	sp|Q9M024|TAAC_ARATH	Thylakoid ADP,ATP carrier protein, chloroplastic OS=Arabidopsis thaliana GN=TAAC PE=1 SV=1	97.44	1e-14	F2DCT5	F2DCT5_HORVD Predicted protein OS=Hordeum vulgare var. distichum PE=2 SV=1	-
209	Unigene26738_All	428 2119 predicted protein [Populus trichocarpa] >gi|222842810|gb|EEE80357.1| predicted protein [Populus trichocarpa]	70970	PTTLSNSTNDVVLAPKSAGLEKDPRELWKRYVDWLYQHKELGLYLDISRVGFTDEFFQAMEPRLQKAFKDMEELEKGAIANPDEGRMVGHYWLRNPKLAPKAFLTQQIEKTLDRICDFAEQVISGKIRPPQKGSFTQILSIGIGGSALGPQFVAEALAPDNPPLKVRFIDNTDPAGIDHQIAQLGSELASTLVIVVSKSGGTPETRNGLLEVQKAFREAGLDFAKQGVAITQENSLLDNTARIEGWLARFPMFDWVGGRTSEMSAVGLLAAALQGIDIKEMLAGAALMDEANRTTVVRNNPAALLALCWYWASDGIGSKDMVVLPYKDSLLLFSRYLQQLVMESLGKEFDLDGNRVNQGITVYGNKGSTDQHAYIQQLRDGVHNFFVTFIEVLRDRPPG…	27|33	1.8|2.5	-|-	1|1	1|1	1|1	1|1	---	---	-	-	-	-	---	---	-	-	-	-	---	---	-	-	-	-	---	---	-	-	-	-	Unigene26738_All	90.09	6e-174	gi|356518402|ref|XP_003527868.1|	PREDICTED: LOW QUALITY PROTEIN: glucose-6-phosphate isomerase-like [Glycine max]	82.95	0	sp|Q8H103|G6PIP_ARATH	Glucose-6-phosphate isomerase 1, chloroplastic OS=Arabidopsis thaliana GN=PGI1 PE=1 SV=1	89.52	0	H9BFL2	H9BFL2_TETTT Glucose-6-phosphate isomerase (Fragment) OS=Tetragonia tetragonoides PE=2 SV=1	alr1050
210	Unigene9375_All	311 1171 minus strand ascorbate peroxidase [Capsicum frutescens]	40705	MAKVIVDSEYLKEIEKARRELRALISNKNCAPIMLRLAWHDAGTYDVNTKTGGPNGSIRNEEEYTHGANNGLKIALDFCEQVKSKCPKITYADLYQLAGVVAVEVTGGPTINFVPGRKDSKISPKEGRLPDAKKGVPHLKEVFYRMGLSDKDIVVLSGGHTLGRAHPERSGFDGPWTTEPLKFDNSYFQELLKGESEGLLKLPTDVALLDDPEFRRYVELYAKDEDAFFKDYAESHKKLSELGFTPTTGAKAIVKDGTILAQSAVGVAVAAAVVILSYFYEVRKKMK	308|306	8.0|12.5	-|-	11|8	11|8	2|3	2|3	2.201	0.911	10	8	*	-	1.501	1.472	7	7	-	-	0.67	0.94	7	7	-	-	1.85	1.257	8	6	*	-	Unigene9375_All	89.9	7e-136	gi|406654310|gb|AFS49700.1|	ascorbate peroxidase [Capsicum frutescens]	83.28	2e-124	sp|Q42564|APX3_ARATH	L-ascorbate peroxidase 3, peroxisomal OS=Arabidopsis thaliana GN=APX3 PE=1 SV=1	89.9	3e-133	A7LIY1	A7LIY1_AVIMR Ascorbate peroxidase OS=Avicennia marina GN=pAPX1 PE=2 SV=1	YKR066c
211	Unigene19466_All	190 1527 minus strand PREDICTED: seryl-tRNA synthetase [Vitis vinifera] >gi|296088317|emb|CBI36762.3| unnamed protein product [Vitis vinifera]	62490	MLDINLFREEKGGNPEKIRESQRRRFANVDLVDEVIELDKVWRQRQFELDGLRTDRNRISKEIARLKIAGEDASGMIATTEENRELTAKKEVEVQEALAAVQSRLAIIGNLVHDSVPVSNDEANNATIRSWGEKRTEPKLKNHVDLVELLGIADIKKGANVAGGRGFYLKGDGVRLNQALINFGLDFLEKRGFTALQTPFFMRKDIMAKCAQLAQFDEELYKVTGEGDDKYLIATAEQPLCAYHLEDWIHPSQMPLRYAGYSSCFRKEAGSHGRDTLGIFRVHQFEKVEQFCITSPNGNDSWEMHEEMLRNSEDFYKLLNIPYQVVAIVSGALNDAAAKKYDLEGWFPASKMYRELVSCSNCTDYQSRRLEIRYGQKKSNDKAKEYVHMLNSTLTATER…	68|41	3.8|3.8	-|-	2|1	2|1	1|1	1|1	---	---	1	-	-	-	---	---	-	1	-	-	---	---	-	-	-	-	---	---	1	1	-	-	Unigene19466_All	87.08	4e-128	gi|388522659|gb|AFK49391.1|	unknown [Lotus japonicus]	80.09	0	sp|O81983|SYS_HELAN	Serine--tRNA ligase OS=Helianthus annuus PE=2 SV=1	85.65	0	D7U1Z6	D7U1Z6_VITVI Putative uncharacterized protein OS=Vitis vinifera GN=VIT_14s0128g00370 PE=3 SV=1	SPAC29A4.15
212	CL9951.Contig1_All	143 1105 minus strand S-adenosyl-L-methionine Mg-protoporphyrin IX methyltranserase [Nicotiana tabacum] >CL9951.Contig2_All 166 1128 S-adenosyl-L-methionine Mg-protoporphyrin IX methyltranserase [Nicotiana tabacum] >CL9951.Contig3_All 166 1	41374	MAFSSFLYSPIHFTLPSPHCHYRRRRPFSVTAAIPPLSTAADVAAVSDTLDSTTLAVIGGGSVAALAAVLSLADPEKRRQMQAEEVGGGDKEVVREYFNNDGFQRWRRIYGDTDDVNKVQKDIRIGHSKTVENVMKMLLDEGPLSGITVCDAGCGTGSLSIPLAKEGAVVAASDISAAMVAEAEKQAQEVLFKGKDELSHGLALPKFEVKDLESLDGKYDTVVCLDVLIHYPQNKADAMIAHLASLAENRLILSFAPKTFYYDLLKRVGELFPGPSKATRAYLHAEADVERALQKVGWRIRKRGLITTQFYFSRIVEAIPA	33|96	3.1|14.0	-|-	1|3	1|3	1|3	1|3	---	1.307	1	2	-	-	---	1.392	1	2	-	-	---	0.943	1	3	-	-	---	1.291	1	3	-	-	CL9951.Contig1_All	83.24	2e-85	gi|224119810|ref|XP_002318168.1|	predicted protein [Populus trichocarpa] >gi|222858841|gb|EEE96388.1| predicted protein [Populus trichocarpa]	59.13	7e-75	sp|Q55467|CHLM_SYNY3	Magnesium-protoporphyrin O-methyltransferase OS=Synechocystis sp. (strain PCC 6803 / Kazusa) GN=chlM PE=3 SV=1	83.24	2e-84	B9I3Z4	B9I3Z4_POPTR Predicted protein OS=Populus trichocarpa GN=POPTRDRAFT_662234 PE=4 SV=1	slr0525
213	Unigene5520_All	186 2468 minus strand Pyrophosphate-energized vacuolar membrane proton pump, putative [Ricinus communis] >gi|223529671|gb|EEF31615.1| Pyrophosphate-energized vacuolar membrane proton pump, putative [Ricinus communis]	90527	ALLPVLGTEILIPICALVGIAFALVQWVLVSKVKLSTDKSHSADGKNGFTEALIEEEDGVSDHSVVQKCADIQSAISEGATSFLVTEYQYVGVFMVAFAVLIFVFLGSVEGFSTKPQPCTYDSTKFCKPALATAAFSTISFVLGAITSVVSGFLGMKIATYANARTTLEARKGVGKAFIVAFRSGAVMGFLLAANGLLVLYIAINLFKLYYGDDWEGLFEAITGYGLGGSSMALFGRVGGGIYTKAADVGADLVGKVERNIPEDDPRNPAVIADNVGDNVGDIAGMGSDLFGSYAESSCAALVVASISSFGINHDLTAMLYPLLISSMGILVCLLTTLFATDFFEVKAVNEIEPALKKQLIISTVLMTVGIAFVSWIGLPSSFTIFNFGIQKDVKSWQL…	223|163	6.8|6.8	-|-	10|7	10|7	4|4	4|4	1.137	1.587	8	7	-	-	0.845	1.686	8	7	-	-	0.944	0.798	8	7	-	-	0.928	1.306	8	7	-	-	Unigene5520_All	97.47	0	gi|14149007|emb|CAC39165.1|	vacuolar-type H+-pyrophosphatase [Solanum lycopersicum]	90.43	0	sp|P21616|AVP_VIGRR	Pyrophosphate-energized vacuolar membrane proton pump OS=Vigna radiata var. radiata PE=1 SV=3	97.47	0	Q93XK9	Q93XK9_SOLLC Vacuolar-type H+-pyrophosphatase (Fragment) OS=Solanum lycopersicum GN=vp1.1 PE=2 SV=1	MA3879
214	CL899.Contig10_All	331 1728 Poly(rC)-binding protein, putative [Ricinus communis] >gi|223538749|gb|EEF40349.1| Poly(rC)-binding protein, putative [Ricinus communis]	55676	LDQNFELEQAHEHEYQPEHELGHEHEHVHEEQNEPEDGIPENSHPDEKQDHSDEPVAGGGEKWPGWPGESIFRMLVPAQKVGSIIGRKGEYIKKTCEETKARIKILDGPPGTRERAVMVSAKEEPDAPLPPAVDGLLRVHKRVVDGLDNDSSYAPSGLGGKVSTRLLVPAAQAGSLIGKQGTTVKSIQEESNCIVRVLGSEDLPVFALQDDRVVEVVGEPTGIHKAIELIASHLRKFLVDRSIISVIEMQMQMPNSQMEQMPPTQHWGPPPQSFPPHAHAGPGYGASPHFMAPSRQFDSYYPPADMPPPPEKQPHQGISAYGREAPMPVHSSSSQAAPSVITQVTQQMQIPLAYADAVIGTQGASISYIRRVSGATVTIQETRGVPGEMTVEISGTSSQ…	88|132	6.4|9.9	7|4	5|6	5|6	2|3	2|3	0.806	0.778	4	6	-	-	---	1.057	1	4	-	-	0.723	1.086	3	6	-	-	0.001	1.035	2	4	-	-	CL899.Contig10_All	78.68	2e-166	gi|224123476|ref|XP_002319087.1|	predicted protein [Populus trichocarpa] >gi|222857463|gb|EEE95010.1| predicted protein [Populus trichocarpa]	33.9	5e-07	sp|O42254|IF2B1_CHICK	Insulin-like growth factor 2 mRNA-binding protein 1 OS=Gallus gallus GN=IGF2BP1 PE=1 SV=1	87.5	3e-16	B9I5K7	B9I5K7_POPTR Predicted protein (Fragment) OS=Populus trichocarpa GN=POPTRDRAFT_662941 PE=4 SV=1	-
215	CL2673.Contig1_All	621 1319 PREDICTED: uncharacterized protein LOC100250144 [Vitis vinifera] >gi|297746514|emb|CBI16570.3| unnamed protein product [Vitis vinifera]	30943	ATPPSTPTPTKAWRTYISEELPRSVQESADSAIRSARSLQQSSSTHLRSLQDFIPQIGTRYRYYEEAFFHKVKDELVSLREHPALAGGVAVTACLLLMRGPRRFLFRQTLGRLQSEEAQFVRAEKNVKELTLSVDLMKKESKKLLERSVLAEKDMKRGHSDLMDAGSQIQSLARSVYRAETEAADLMDLLREIPGREALKLRADVASMASHLRQQRFAMDKNILKISELGVPV	33|49	5.2|5.6	-|2	1|1	1|1	1|1	1|1	---	---	1	1	-	-	---	---	1	-	-	-	---	---	1	1	-	-	---	---	1	-	-	-	CL2673.Contig1_All	77.13	2e-98	gi|460366188|ref|XP_004228972.1|	PREDICTED: uncharacterized protein LOC101267925 [Solanum lycopersicum]	-	-	-	-	70.4	2e-82	D7SLP2	D7SLP2_VITVI Putative uncharacterized protein OS=Vitis vinifera GN=VIT_06s0004g00100 PE=4 SV=1	-
216	CL10067.Contig1_All	150 878 minus strand Os11g0312400 [Oryza sativa Japonica Group] >gi|585338|sp|Q08480.1|KAD2_ORYSJ RecName: Full=Adenylate kinase B; Short=AK B; AltName: Full=ATP-AMP transphosphorylase B >gi|391879|dbj|BAA01181.1| adenylate kinase-b [Oryza sativ	35007	MAATANLEDVPSVDLMTELLRRMKCANKPDKRLILVGPPGSGKGTQSPIIKDEFCLCHLATGDMLRAAVAAKTPLGIKAKEAMEKGELVSDDLVVGIIDEALKKPSCQKGFILDGFPRTVVQAQKLDEMLEKRGVKVDKVLNFAIDDAILEERITGRWIHPSSGRTYHTKFAPPKVPGVDDVTGESLIQRKDDTAAVLKSRLEAFHKQTEPVIDYYNKKGIVANLPAEKPPQEVTSEVKKALS	295|412	20.2|27.6	1|1	13|13	13|6	4|5	4|2	1.381	0.75	11	5	*	-	1.017	0.853	9	3	-	-	1.098	1.061	11	5	-	-	1.382	0.829	8	3	-	-	CL10067.Contig1_All	92.74	2e-62	gi|357477155|ref|XP_003608863.1|	Adenylate kinase B [Medicago truncatula] >gi|355509918|gb|AES91060.1| Adenylate kinase B [Medicago truncatula]	90.53	1e-128	sp|Q08480|KAD2_ORYSJ	Adenylate kinase B OS=Oryza sativa subsp. japonica GN=ADK-B PE=2 SV=1	92.74	2e-61	G7JMK0	G7JMK0_MEDTR Adenylate kinase B OS=Medicago truncatula GN=MTR_4g103800 PE=3 SV=1	YDR226w
217	CL7984.Contig1_All	169 1296 GDP-D-mannose 3&apos;,5&apos;-epimerase [Actinidia deliciosa]	51617	MGSTGETNYGAYTYENLEREPYWPSEKLRISITGAGGFIASHIARRLKSEGHYIIASDWKKNEHMSEDMFCHEFHLVDLRVMDNCLKVTKGVDHVFNLAADMGGMGFIQSNHSVIMYNNTMISFNMIEAARINGVKRFFYASSACIYPEFKQLDTNVSLKESDAWPAEPQDAYGLEKLATEELCKHYNKDFGIECRIGRFHNIYGPFGTWKGGREKAPAAFCRKAITSTDKFEMWGDGLQTRSFTFIDECVEGVLRLTKSDFREPVNIGSDEMVSMNEMAEIVLSFENKKLPIHHIPGPEGVRGRNSDNTLIKEKLGWAPSMKLKDGLRITYFWIKEQLEKEKAQGLDLSAYGSSKVVGTQAPVQLGSLRAADGKE	276|271	19.9|22.1	1|1	11|15	11|15	6|7	6|7	0.933	1.153	11	11	-	-	1.137	1.031	11	8	-	-	0.819	0.719	11	10	*	-	0.771	1.129	11	9	-	-	CL7984.Contig1_All	97.37	1e-37	gi|361068341|gb|AEW08482.1|	Pinus taeda anonymous locus CL91Contig1_01 genomic sequence >gi|383125906|gb|AFG43543.1| Pinus taeda anonymous locus CL91Contig1_01 genomic sequence >gi|383125908|gb|AFG43544.1| Pinus taeda anonymous locus CL91Contig1_01 genomic sequence >gi|383125910|gb|AFG43545.1| Pinus taeda anonymous locus CL91Contig1_01 genomic sequence >gi|383125912|gb|AFG43546.1| Pinus taeda anonymous locus CL91Contig1_01 …	95.07	0	sp|Q2R1V8|GME2_ORYSJ	GDP-mannose 3,5-epimerase 2 OS=Oryza sativa subsp. japonica GN=GME-2 PE=2 SV=2	97.37	1e-36	H9V1B7	H9V1B7_PINTA Uncharacterized protein (Fragment) OS=Pinus taeda GN=CL91Contig1_01 PE=4 SV=1	PH0378
218	CL10151.Contig2_All	86 592 minus strand cysteine protease Cp1 [Actinidia deliciosa]	21586	MARVLLLVVRVLIACVAGARAGSEFLAEDNRIRQVVDGLHELESSILQIVGNSRRALSFARFAHRYGKRYEDTEEIQRRFEIFSENLRMIRSHNKKGLSYTMGVNEFSDMTWDEFRRHRLGAAQNCSATTGGNHKLIDVALPELKDWREDGIVSPVKNQGHCGSCWTFS	-|19	-|7.1	-|-	-|1	-|1	-|1	-|1	-	---	-	-	-	-	-	---	-	-	-	-	-	---	-	-	-	-	-	---	-	-	-	-	CL10151.Contig2_All	77.93	7e-64	gi|158524604|gb|ABW71226.1|	cysteine protease [Nicotiana tabacum]	72.41	1e-06	sp|P82474|CPGP2_ZINOF	Zingipain-2 OS=Zingiber officinale PE=1 SV=1	77.93	6e-63	C3RSF4	C3RSF4_TOBAC Cysteine protease OS=Nicotiana tabacum PE=2 SV=1	-
219	CL1481.Contig71_All	302 3334 minus strand PREDICTED: lysosomal alpha-mannosidase-like [Vitis vinifera]	128808	IIAAIFAGTCFAMQVNSIYIPYNTTSGIAPAKINVHLVPHSHDDVGWLKTVDQYYVGANNSIRGACVQNVLDSVISALLDDKNRRFIYVEMAFFQRWWRQQSDTLKAKVKQLVNSGQLEFINGGMCMHDEATPHYIDLIDQTTLGHRFILDEFGKKPRVGWQIDPFGHSAVQAYLLGAELGFDSLFFARIDYQDRAKRRSDKTLEVIWRGSRSLSSSSQIFTGIFPIHYEPPDGFTFEINDVSAPIQDDDLLFDYNVQQRVDDFVAAAVAQANLTRTNHIMWTMGTDFRYQYAISWFRQMDKFIHYVNLDGRVNALYSTPSIYTDAKYAANEKWPLKTGDFFPYADRENAYWTGYFTSRPALKGYVRMLSGYYLAARQLEFFKGRYGSGPSTDALADAL…	-|546	-|7.0	-|-	-|22	-|12	-|6	-|4	-	1.462	-	7	-	-	-	0.592	-	7	-	*	-	1.08	-	7	-	-	-	0.947	-	7	-	-	CL1481.Contig71_All	78.55	0	gi|462411065|gb|EMJ16114.1|	hypothetical protein PRUPE_ppa000707mg [Prunus persica]	41.09	0	sp|Q60HE9|MA2B1_MACFA	Lysosomal alpha-mannosidase OS=Macaca fascicularis GN=MAN2B1 PE=2 SV=1	77.25	0	D7SVH6	D7SVH6_VITVI Putative uncharacterized protein OS=Vitis vinifera GN=VIT_14s0068g01110 PE=4 SV=1	TM1851
220	Unigene9399_All	35 1360 minus strand PREDICTED: uncharacterized protein LOC100253735 [Vitis vinifera]	57806	KYKMAALQLRHLTPLAPYLSPLTKRTLNFSYFHTLSTPSRNKRFSTSIMASAAKKVLVPVANGTEPLEAVITIDVLRRAGADVTVASVEKQLGVDACHGVKIVADALISDCADTAFDLISLPGGIPGAATLKDCTILESMVKKQAADDRPYAAICAAPAVALGSWGLLKGLKATCYPSFMEQLSSSASAVESRVQQDGKVVTSRGPGTTMEYAVALVELLYGKEKADEVSGPLVMRSNHGDEYTFTELNPVKWTFDSSPQILVPIANGTEEMEAVIIIDVLRRAKAEVVVASVEDKLEILASRKVKLVADVLLDEVINRSYDLIVLPGGLGGAQAFADSEKLVNLLKKQRESNKLYGAICASPALVLEPHGLLKGKKATAFPAMCNKLSDPSEAESRVV…	233|183	12.9|5.4	-|-	7|6	7|6	4|2	4|2	1.571	1.468	5	5	-	-	1.43	1.366	3	5	-	-	0.581	0.899	4	4	-	-	2.081	1.237	4	4	*	-	Unigene9399_All	84.06	2e-26	gi|224153140|ref|XP_002337320.1|	predicted protein [Populus trichocarpa] >gi|222838768|gb|EEE77119.1| predicted protein [Populus trichocarpa]	72.75	4e-162	sp|Q9MAH3|DJ1B_ARATH	Protein DJ-1 homolog B OS=Arabidopsis thaliana GN=DJ1B PE=2 SV=1	82.46	5e-49	B9SE59	B9SE59_RICCO Putative uncharacterized protein OS=Ricinus communis GN=RCOM_1521600 PE=4 SV=1	YPO3172
221	CL3287.Contig3_All	3 191 minus strand predicted protein [Populus trichocarpa] >gi|222841325|gb|EEE78872.1| predicted protein [Populus trichocarpa]	9125	GEAVKYKSSMDAFAQILKNEGAKSLFKGAGANILRAVAGAGVLAGYDKLQMIVLGKKYGSGGA	222|191	38.1|38.1	-|-	6|5	2|2	2|2	1|1	0.491	0.961	2	2	-	-	0.348	1.854	2	2	-	-	1.028	0.405	2	2	-	-	0.171	0.71	2	2	-	-	CL3287.Contig3_All	95.24	3e-19	gi|147863982|emb|CAN81107.1|	hypothetical protein VITISV_008170 [Vitis vinifera]	92.06	2e-19	sp|P31167|ADT1_ARATH	ADP,ATP carrier protein 1, mitochondrial OS=Arabidopsis thaliana GN=AAC1 PE=1 SV=2	95.24	2e-18	B9GWA4	B9GWA4_POPTR Predicted protein OS=Populus trichocarpa GN=POPTRDRAFT_830977 PE=3 SV=1	-
222	Unigene19460_All	614 2041 minus strand PREDICTED: uncharacterized protein LOC100790297 [Glycine max]	54724	FMGLLGMNYGLAVTALFLLFMVNTVHSIGANWGTQATHPLPPSTVVKLLRDNGIQKVKLFDAEARVLNAFSGSGIEVMVGIPNDMLSTLANSVSAAERWVERNVSAHVSSNSVDIRYVAVGNEPFLSTYNGTFLTTTFPALQNIQAALIKAGLGNRVKVTLPLNADVYQSSTQQPSTGDFRPDIRDLMVQIVSFLSVNGAPFTVNIYPFISLYNDPNFPVDYAFFDGYSSSIDDNGRTYTNVFDANYDTLVWALQRNGFANLTIIVGEIGWPTDGDRNANIGYAQRFNQGFMSHVNRGTPMRPGPVDAYLFSLIDEDAKSIQPGNFERHWGIFNYDGTPKYNLSLSSNSGGLVPASNVRYLPRRWCVLSSSASLEDPQVAPSVSYACSRADCTSLGYGT…	40|18	4.6|4.6	-|-	1|1	1|1	1|1	1|1	---	---	1	-	-	-	---	---	-	-	-	-	---	---	-	-	-	-	---	---	1	-	-	-	Unigene19460_All	75.71	0	gi|462419282|gb|EMJ23545.1|	hypothetical protein PRUPE_ppa004814mg [Prunus persica]	70.47	0	sp|Q93Z08|E136_ARATH	Glucan endo-1,3-beta-glucosidase 6 OS=Arabidopsis thaliana GN=At5g58090 PE=1 SV=2	74.88	6e-179	I1JUK9	I1JUK9_SOYBN Uncharacterized protein OS=Glycine max PE=4 SV=1	YGR282c
223	CL2552.Contig1_All	265 561 minus strand PREDICTED: [Pyruvate dehydrogenase [lipoamide]] kinase, mitochondrial [Vitis vinifera] >gi|297736808|emb|CBI26009.3| unnamed protein product [Vitis vinifera]	13663	MAAKKASEGFSKGLIEEVHRWGAMKQTGVSLRYMMEFGSRPTSRNLLISAQFLHKELPIRIARRAIELDSLPYGLSHKPAVLKESRRGGULSEVRDDYI	29|-	7.1|-	6|-	1|-	1|-	1|-	1|-	---	-	-	-	-	-	---	-	-	-	-	-	---	-	-	-	-	-	---	-	-	-	-	-	CL2552.Contig1_All	85.54	2e-35	gi|46850513|gb|AAT02656.1|	mitochondrial pyruvate dehydrogenase kinase isoform 2 [Glycine max]	83.13	3e-35	sp|Q9SBJ1|PDK_ARATH	[Pyruvate dehydrogenase (acetyl-transferring)] kinase, mitochondrial OS=Arabidopsis thaliana GN=PDK PE=1 SV=1	85.54	3e-34	C6TCU2	C6TCU2_SOYBN Putative uncharacterized protein OS=Glycine max PE=2 SV=1	SPAC644.11c
224	CL3733.Contig1_All	498 956 minus strand PREDICTED: uncharacterized protein LOC100252790 isoform 1 [Vitis vinifera] >gi|359481721|ref|XP_003632663.1| PREDICTED: uncharacterized protein LOC100252790 isoform 2 [Vitis vinifera] >gi|297740289|emb|CBI30471.3| unnamed pr	19289	MEGGKQSGSSLASDLFGAKDSTAAASSSGIFGSIFAPPAKVLGRESLHSSETEKKNNFGNPSWSAKTGVSDNNALGGEGQSQSTTSKDISSYYQEEKVQPFHYSSSIYYGGQDVYSRPQSTQNPGFTTFNKDGGEDDSGSASRGNWWQGSLYY	23|55	9.2|22.2	1|-	1|3	1|3	1|3	1|3	---	0.007	-	2	-	-	---	---	-	1	-	-	---	---	-	1	-	-	---	0	-	2	-	-	CL3733.Contig1_All	60.49	1e-17	gi|449439960|ref|XP_004137753.1|	PREDICTED: uncharacterized protein LOC101220657 [Cucumis sativus] >gi|449511090|ref|XP_004163859.1| PREDICTED: uncharacterized LOC101220657 [Cucumis sativus]	-	-	-	-	56.06	4e-11	D7MRS6	D7MRS6_ARALL Putative uncharacterized protein OS=Arabidopsis lyrata subsp. lyrata GN=ARALYDRAFT_496048 PE=4 SV=1	-
225	CL7270.Contig1_All	138 1070 PREDICTED: protein grpE-like [Vitis vinifera] >gi|297737494|emb|CBI26695.3| unnamed protein product [Vitis vinifera]	42379	MSLSRITSRFSRTVLTQCRNSPLFFGRHDLKHVSSFTNQLLSPSGLHDKVVTGQLSLRHHSAEISSAFQWFGFSSSASPQPNEKETAQSGNEQENKANNGAASAVDAPDQTEASMSEEKTEPDLESDLSRDDLVKLVAEKEQVLGIKQEELEKMKDKVLRTLAEMENVKERTRRESENAKKFAIQNFAKSLLDVADNLGRASSAAKESFSKLEAPKDAAGAVQQLKTLLEGVEMTEKQLSEVFKKFGLEKYDPVDEDFDPNRHNAVFQVPDASKPADRVAVVLKAGYMLHDRVIRPAEVGVTVAVNNEEAE	288|152	13.5|9.6	2|2	13|6	13|6	4|3	4|3	0.778	0.508	12	4	-	-	0.581	0.588	5	4	-	-	0.61	0.964	11	4	*	-	0.274	0.241	6	4	*	-	CL7270.Contig1_All	65.85	2e-08	gi|147776536|emb|CAN65126.1|	hypothetical protein VITISV_044386 [Vitis vinifera]	47.33	2e-32	sp|Q3SW78|GRPE_NITWN	Protein GrpE OS=Nitrobacter winogradskyi (strain Nb-255 / ATCC 25391) GN=grpE PE=3 SV=1	64.92	5e-77	B9I170	B9I170_POPTR GrpE protein homolog (Fragment) OS=Populus trichocarpa GN=POPTRDRAFT_234828 PE=3 SV=1	BMEI1777
226	CL6824.Contig1_All	93 362 F18O14.34 [Arabidopsis lyrata subsp. lyrata] >gi|297336189|gb|EFH66606.1| F18O14.34 [Arabidopsis lyrata subsp. lyrata]	10774	GHSAVLHGCTVEDETFVGMGATLLDGVVVEKHAMVAAGALVRQNTRIPSGEVWGGNPAKFLRKLTEDEIAFTSQSAINYSNLAQVHAAEN	-|25	-|14.4	-|1	-|1	-|1	-|1	-|1	-	---	-	-	-	-	-	---	-	-	-	-	-	---	-	-	-	-	-	---	-	-	-	-	CL6824.Contig1_All	96.08	8e-22	gi|334182697|ref|NP_001185039.1|	gamma carbonic anhydrase 1 [Arabidopsis thaliana] >gi|332191750|gb|AEE29871.1| gamma carbonic anhydrase 1 [Arabidopsis thaliana]	91.11	1e-43	sp|Q9FWR5|GCA1_ARATH	Gamma carbonic anhydrase 1, mitochondrial OS=Arabidopsis thaliana GN=GAMMACA1 PE=1 SV=1	96.08	1e-20	F4HP82	F4HP82_ARATH Gamma carbonic anhydrase 1 OS=Arabidopsis thaliana GN=GAMMA CA1 PE=4 SV=1	aq_1660
227	CL5859.Contig2_All	90 1346 minus strand unknown [Populus trichocarpa]	52701	MAKPARGRPASPSGSDSGSSSRSRSRSYSGSDSRSSSRSRSRSRSRSFSSSSSPSRSGSSRSPAPPRKSPAEGVKRGRSPPLPPPPQTKKTSPPPRKASPIPESLVLHVDQLSRNVNENHLKEIFGNFGEVVNARVAIDHVVNLPKGFAYVEFKSRADAEKAQLYMDGAQIDGKVVRAKFTLPERKKVTSPPKAVATTSRRDAPKSEDATADGDKDGPKRPREVSPRRKPLSPPRRRSPVARRGSPRREPDSPPPPRRHADSPARRRADSPYRRGDSPPLRRRPASPARGRSPSSPPRRYRSPPRASPRRIRGSPVRRRSPLPPRRRSPRRARSPPRRSPVGRRRSRSPVRRPARSPSRSPSPRRGRGPPARRGRLSSYSSSPSPRRAPRRVSRSRSPR…	32|40	2.6|5.0	1|1	1|2	1|1	1|2	1|1	---	---	1	1	-	-	---	---	-	1	-	-	---	---	1	1	-	-	---	---	-	1	-	-	CL5859.Contig2_All	79.45	2e-54	gi|82400144|gb|ABB72811.1|	putative arginine/serine-rich protein [Solanum tuberosum]	73.17	2e-47	sp|Q9SEE9|SR45_ARATH	Arginine/serine-rich protein 45 OS=Arabidopsis thaliana GN=SR45 PE=1 SV=1	79.45	2e-53	Q2XPW2	Q2XPW2_SOLTU Putative arginine/serine-rich protein OS=Solanum tuberosum PE=2 SV=1	-
228	CL5323.Contig3_All	2 250 chloroplast oxygen-evolving enhancer protein [Manihot esculenta]	13238	IDKKAWPYVQNDLRLRAEYLRYDLNTVISAKPKEEKQSLKDLTGKLFQNINNLDYAAKIKSTPQAEKYYAETVSALNDVLSKL	291|181	60.2|60.2	-|-	17|12	8|6	4|4	3|3	0.954	0.865	6	4	-	-	0.675	0.842	5	4	-	-	0.721	1.283	6	4	-	-	0.287	1.313	5	4	*	-	CL5323.Contig3_All	86.75	1e-36	gi|56122682|gb|AAV74404.1|	chloroplast oxygen-evolving enhancer protein [Manihot esculenta]	85.54	5e-36	sp|Q41932|PSBQ2_ARATH	Oxygen-evolving enhancer protein 3-2, chloroplastic OS=Arabidopsis thaliana GN=PSBQ2 PE=1 SV=2	86.75	1e-35	Q5PYQ5	Q5PYQ5_MANES Chloroplast oxygen-evolving enhancer protein OS=Manihot esculenta PE=2 SV=1	-
229	CL10594.Contig1_All	63 2264 minus strand serine protease [Coffea arabica]	84883	MGYYMFLTVVCLLNFHTIVRSVDSNLETYIVHVELPSSLTLSSLMEDLQGWYQTFLPSTLSSSSADDPPRIIYSYHNVFKGFAARLLPEQVKAMETKPGFVSARPQKTLPLHTTHSPNFLGLNQNMGFWRDSNYGRGVIIGVLDSGINPDHPSFNDEGMPPPPAKWKGRCEFNSTVCNNKLIGARYFTIGNGTPFDENGHGTHTASTAAGNFVTGANVFGNANGTAAGIAPLAHIAIYKVCVTRCSESDILAAMDTAIDDGVDIISLSLGGPARNFYNENVAVGAFSAIEKGIFVSASAGNSGPSLGTIENGAPWILTVGASSVDRKIRATAVLGNNEELDGESTFQPADFPSTLLPLVYPGMNSSNANAEFCSLASLRNVDVQGKIVLCGIGGGIGRI…	24|-	2.2|-	-|-	1|-	1|-	1|-	1|-	---	-	-	-	-	-	---	-	-	-	-	-	---	-	-	-	-	-	---	-	-	-	-	-	CL10594.Contig1_All	65.22	0	gi|460401239|ref|XP_004246134.1|	PREDICTED: subtilisin-like protease-like [Solanum lycopersicum]	42.27	9e-157	sp|O65351|SUBL_ARATH	Subtilisin-like protease OS=Arabidopsis thaliana GN=ARA12 PE=1 SV=1	64.86	0	F6HUK0	F6HUK0_VITVI Putative uncharacterized protein OS=Vitis vinifera GN=VIT_02s0025g04790 PE=4 SV=1	BH0831
230	CL3095.Contig18_All	140 2599 PREDICTED: uncharacterized WD repeat-containing protein C1672.07 isoform 1 [Vitis vinifera] >gi|297740341|emb|CBI30523.3| unnamed protein product [Vitis vinifera] >CL3095.Contig21_All 140 2599 PREDICTED: uncharacterized WD repeat-cont	107296	MGIFEPFRAIGYITTHVPFSIQRLGTETFVTVSVGKAFQIYNCAKLNLVLVGPQLPKKIRALASYRDYTFAAYGHNVAVFKRAHQVATWASHKAKVNHLLLFGEYIFSIDVKGNIFIWAFKGITENLSPVGHILLESKFTPSCIMHPDTYLNKVILGSQEGSLHLWNISTKKKLYEFKGWKSAISCCVSSPALDVVAVGCSDGKIHVHNIRYDEEIVTFTHSTRGAVTALSFSTDGQPLLASGGSSGVISIWNLEKRRLQSVIGEAHDCSIVSLHFFASEPVLMSSSADNSIKMWIFDTSDGDPRLLRFRSGHSAPPLCIRFYANGRHILSAGQDRAFRLFSVIQDQQSRELSQRHVSKRAKKLKLKEAEIKLKPVIAFDVAEIRERDWCNIVTCHMDT…	16|-	0.9|-	-|-	1|-	1|-	1|-	1|-	---	-	-	-	-	-	---	-	-	-	-	-	---	-	-	-	-	-	---	-	-	-	-	-	CL3095.Contig18_All	81.3	0	gi|225440418|ref|XP_002269448.1|	PREDICTED: uncharacterized WD repeat-containing protein C1672.07 isoform 1 [Vitis vinifera] >gi|297740341|emb|CBI30523.3| unnamed protein product [Vitis vinifera]	42.37	3e-06	sp|A7EKM8|LIS1_SCLS1	Nuclear distribution protein PAC1 OS=Sclerotinia sclerotiorum (strain ATCC 18683 / 1980 / Ss-1) GN=pac1 PE=3 SV=1	81.3	0	D7THK7	D7THK7_VITVI Putative uncharacterized protein OS=Vitis vinifera GN=VIT_08s0007g00730 PE=4 SV=1	all0283_3
231	Unigene15795_All	171 623 unnamed protein product [Vitis vinifera]	25642	MKGGRSKVESKKADAKLSVKKGAAAGGKKPVKKGKPAKDPNKPKRPASAFFVFMEEFRKQYKEKHPNNKSVAAVGKAGGDKWKSLSEAEKAPYVAKAEKRKADYEKSLQAYNKRISDGAGAEEESDKSRSEVNDDEDDDEEGSGEEDEDDD	-|46	-|9.3	-|-	-|1	-|1	-|1	-|1	-	---	-	1	-	-	-	---	-	1	-	-	-	---	-	-	-	-	-	---	-	-	-	-	Unigene15795_All	90	2e-20	gi|462398117|gb|EMJ03785.1|	hypothetical protein PRUPE_ppa011596mg [Prunus persica]	69.17	1e-36	sp|P40619|HMGL_IPONI	HMG1/2-like protein OS=Ipomoea nil PE=2 SV=1	80.56	8e-10	G7L9E0	G7L9E0_MEDTR HMG1/2-like protein OS=Medicago truncatula GN=MTR_8g073610 PE=4 SV=1	SPAC57A10.09c
232	CL2882.Contig2_All	1 450 predicted protein [Populus trichocarpa] >gi|222851275|gb|EEE88822.1| predicted protein [Populus trichocarpa]	20160	GVFDLYFFSGPSPLAVVNQYTAFIGRPAAMPYWAFGFHQCRWGYHNLSVVEDVVENYKKAKIPLDVIWNDDDHMDGHKDFTLNPVNYPRPKLLAFLEKIHAQGMKYIVIIDPGIGVNNSYGVYQRGIANDVFIKYEGKPYLAQVWPGAVN	74|52	6.0|6.0	-|-	2|1	2|1	1|1	1|1	0.665	---	2	1	-	-	1.056	---	2	1	-	-	1.691	---	2	1	-	-	1.158	---	2	1	-	-	CL2882.Contig2_All	93.33	2e-80	gi|224099363|ref|XP_002311455.1|	predicted protein [Populus trichocarpa] >gi|222851275|gb|EEE88822.1| predicted protein [Populus trichocarpa]	83.22	3e-71	sp|Q9S7Y7|XYL1_ARATH	Alpha-xylosidase 1 OS=Arabidopsis thaliana GN=XYL1 PE=1 SV=1	93.33	3e-79	B9HJ23	B9HJ23_POPTR Predicted protein OS=Populus trichocarpa GN=POPTRDRAFT_564524 PE=4 SV=1	SPAPB24D3.10c
233	CL1172.Contig1_All	79 909 xyloglucan endotransglycosylase [Striga asiatica]	36747	MDIFMVFFFLFSLVVGTFAGNFNQDFDITWGDGRGKILNNGKLLTLSLDKTSGSGFRSKNQFLFGKIDMQLKLVPGNSAGTVTAYYLSSLGSNHDEIDFEFLGNLSGDPYILHTNVFTQGKGNREQQFYLWFDPTKDFHTYSILWNPQSIIFSVDGTPIRQFKNLESKGIAYPKNQPMWIFSSLWSADDWATRGGLVKTDWTQAPFTASYTNFNALACTTASNSCSKNSSANSWFSQSLDNTGQERIKWVQKNYMIYNYCTDSKRFPQGFPPECTIS	20|-	4.3|-	5|-	1|-	1|-	1|-	1|-	---	-	-	-	-	-	---	-	-	-	-	-	---	-	-	-	-	-	---	-	-	-	-	-	CL1172.Contig1_All	86.77	6e-124	gi|90811697|gb|ABD98046.1|	xyloglucan endotransglycosylase [Striga asiatica]	73.56	2e-108	sp|Q38910|XTH23_ARATH	Probable xyloglucan endotransglucosylase/hydrolase protein 23 OS=Arabidopsis thaliana GN=XTH23 PE=2 SV=1	90.97	2e-79	C6T6P7	C6T6P7_SOYBN Putative uncharacterized protein (Fragment) OS=Glycine max PE=2 SV=1	YLR213c
234	CL1640.Contig1_All	150 1436 minus strand PREDICTED: uncharacterized protein LOC100244223 [Vitis vinifera] >CL1640.Contig3_All 150 1436 minus strand PREDICTED: uncharacterized protein LOC100244223 [Vitis vinifera] >CL1640.Contig4_All 150 1436 minus strand P	60172	KFYFLETKKMSICTPFNCNGLTLQSSKSHSFKRLFTSHLISQVQVTTVPYAVPLPSVYLSENFKFSKERFKLVTASATSTVETLKVSFRRKNPKDINVLVVGSTGYIGKFVVKELVERGFNVIAIAREKSGIRGKNSKEETLGVLSGANVCFSDVTKLESLEKSIENLGISVDVVVSCLASRTGGVKDSWLIDYEATKNSLLAGRKFGAAHFVLLSAICVQKPLLEFQRAKLKFEAELMEEAKHDEGFTYSIVRPTAFFKSLAGQVELVKDGKPYVMFGDGKLCACKPISEPDLASFIADCVLSEDLINKILPIGGPGGALTPLEQGEMLFRLARKEPKFLKVPIQIMDFAIGFLDFLVKVFPSLEDVAEFGKIGRYYAAESMLVWDPETGEYNAEKTP…	-|71	-|7.5	-|1	-|2	-|2	-|2	-|2	-	---	-	-	-	-	-	---	-	-	-	-	-	---	-	-	-	-	-	---	-	-	-	-	CL1640.Contig1_All	81.95	6e-129	gi|255551651|ref|XP_002516871.1|	conserved hypothetical protein [Ricinus communis] >gi|223543959|gb|EEF45485.1| conserved hypothetical protein [Ricinus communis]	29.87	5e-06	sp|P52579|IFRH_TOBAC	Isoflavone reductase homolog A622 OS=Nicotiana tabacum PE=2 SV=1	81.95	6e-128	B9RT02	B9RT02_RICCO Putative uncharacterized protein OS=Ricinus communis GN=RCOM_0679860 PE=4 SV=1	all5305
235	CL10043.Contig2_All	122 946 conserved hypothetical protein [Ricinus communis] >gi|223547577|gb|EEF49072.1| conserved hypothetical protein [Ricinus communis]	35272	MGSRYEVEVTITSAKDLKNVNWRHGKLKPYAVVWVDPKNKCSTRVDEEGDTSPYWDVKLIIPFNSSIEDSTLYIDIVHANAAEDTKPLIGSAKLHLRDVVDEVGLGSRAERKLELKRPSGRPQGKVEVNVSVREPRYRAPDPYYAPPYGVPPPGTRDYPAQPYGSPYGAPPAYAAPPSGYPPYGAPPSYGHPSYGQAAYGQGSYYGEQSYGQQGYVEEKKKSKFGGMGTGLAVGAVAGALGGLALAEGFDALEDKIADDAAERVEDDLGYDGDDY	122|60	10.5|10.5	-|-	6|2	6|2	2|2	2|2	0.714	1.063	5	2	-	-	1.188	---	3	1	-	-	1.111	0.792	5	2	-	-	0.915	---	3	1	-	-	CL10043.Contig2_All	73.33	3e-52	gi|460390195|ref|XP_004240724.1|	PREDICTED: uncharacterized protein LOC101263030 [Solanum lycopersicum]	-	-	-	-	71.11	2e-50	B9RIV0	B9RIV0_RICCO Putative uncharacterized protein OS=Ricinus communis GN=RCOM_1582990 PE=4 SV=1	-
236	CL2883.Contig4_All	181 1338 minus strand PREDICTED: ATP-dependent Clp protease proteolytic subunit-related protein 1, chloroplastic [Vitis vinifera] >gi|296083061|emb|CBI22465.3| unnamed protein product [Vitis vinifera]	51335	MASSSLLLTPLSSTTTENRELSSNSAAFAFVHNPKLVLTAKPRKGAGRRCGFKSPVARKSLDHIPKQFREENLKDGLMDNFKNTPQYLYGLTSSQMDMFMTEDNPVRRQAEKVTEDSISSACNYLSSGGMWSLSGMNERGPSKYSMSVSMYRGGARGYGRPRTAPPDLPSLLLDARIVYLGMPIVPAVTELLVAQFMWLDYDSPTKPIYLYINSSGTQNEKMETVGSETEAYAIADTMAYCKSDVYTVNCGMAYGQAAMLLSLGAKGYRALQPNSSTKLYLPKVNRSSGAVIDMWIKAKELDANTEYYLELLAKGIGKPKEELEKDIQRPKYFQAQEAIDYGIADKIIKSSDAAFEKRNYEELLAQSKAMRRGAGVGPQAAPSGFR	222|144	7.5|6.2	3|3	8|4	8|4	2|2	2|2	1.935	1.132	5	4	*	-	1.698	0.92	3	3	-	-	0.9	0.831	4	4	-	-	2.031	1.335	3	3	-	-	CL2883.Contig4_All	83.85	8e-120	gi|255573147|ref|XP_002527503.1|	ATP-dependent Clp protease proteolytic subunit, putative [Ricinus communis] >gi|223533143|gb|EEF34901.1| ATP-dependent Clp protease proteolytic subunit, putative [Ricinus communis]	77.2	2e-128	sp|Q9XJ35|CLPR1_ARATH	ATP-dependent Clp protease proteolytic subunit-related protein 1, chloroplastic OS=Arabidopsis thaliana GN=CLPR1 PE=1 SV=1	83.85	9e-119	B9SND4	B9SND4_RICCO ATP-dependent Clp protease proteolytic subunit OS=Ricinus communis GN=RCOM_0175080 PE=3 SV=1	slr0164
237	Unigene31163_All	86 1018 peroxidase 3 [Scutellaria baicalensis]	35068	FSVRLMLVLLLIGVGNAQLSSNFYNSTCSNLLSIIRTAVNSAVSGEARMGASLLRLHFHDCFVNGCDASVLLDDTANFTGEKTAGPNANSLRGFDVIDNIKTQVERSCPGVVSCADILAVAARDGVVALNGPSWAVALGRRDSTTASLSAANNQIPAPTLNLNALISAFSNKGFTTRELVALSGSHTIGQARCTSFRNRIYNEANINASFAASVQANCPRSGGNNNLSPLDNVSPTVFNNDYFRNLVSLRGLLHSDQQLFNNGSTDAQVRAYSSNSASFFNDFASAMVKMSNLSPLTGTNGQIRRNCRRTN	54|72	8.4|2.9	-|-	2|2	2|2	2|1	2|1	1.315	0.893	2	2	-	-	1.697	0.482	2	2	-	-	---	1.125	1	2	-	-	---	0.476	1	2	-	-	Unigene31163_All	83.28	2e-143	gi|4760704|dbj|BAA77389.1|	peroxidase 3 [Scutellaria baicalensis]	71.84	2e-124	sp|P22195|PER1_ARAHY	Cationic peroxidase 1 OS=Arachis hypogaea GN=PNC1 PE=1 SV=2	83.28	2e-142	Q9SSZ7	Q9SSZ7_SCUBA Peroxidase 3 OS=Scutellaria baicalensis PE=2 SV=1	-
238	Unigene3463_All	2 127 minus strand Benzyl alcohol O-benzoyltransferase OS=Nicotiana tabacum GN=HSR201 PE=1 SV=1	5794	PYAGRLVEGPDKKFKVDCTAEGVAFVEADARVTLEQLGNTVQ	-|19	-|28.6	-|-	-|1	-|1	-|1	-|1	-	---	-	-	-	-	-	---	-	-	-	-	-	---	-	-	-	-	-	---	-	-	-	-	Unigene3463_All	72.22	2e-07	gi|356571165|ref|XP_003553750.1|	PREDICTED: LOW QUALITY PROTEIN: benzyl alcohol O-benzoyltransferase-like [Glycine max]	65.79	1e-08	sp|Q5H873|HLTT_LUPAL	13-hydroxylupanine O-tigloyltransferase OS=Lupinus albus GN=HMT/HLT PE=1 SV=1	71.05	5e-08	I1NC63	I1NC63_SOYBN Uncharacterized protein OS=Glycine max PE=4 SV=1	-
239	CL11063.Contig2_All	158 2860 lipoxygenase 2 [Olea europaea]	116828	MMKHNLQTNLTTQTLLPMHKPFLCGGGNAASSFAIAQKNSISTRKSKNFRVLRRASTGVKAVLTTTEKSTSVKAVITVLQTVGGALTHLGLSRGLDDIADLLGKTLLVELVAAELDPGSRVEKPTIKSYAHKTGKDGNETYYESTFEIPRDFGEVGAVLIENEHRKEMFVKNIVFDGLSNNSVDVTCNSWIHSKFDNPEKRVFFTNKSYLPSQTPGGLKSYREKELEILRGDGQGERKTSDRIYDYDVYNDLGDPDADDDLARPVLGGAEHPYPRRCRTGRPRTEKDPLSESRSSSVYVPRDEAFSEVKQATFSAKTVYSVLHALVPSLQVSIIDSDLGFPHFTAIDTLFDEGFELPDIPTTGFLGNIIPRLVRAISETGSSILRFETPELIDRDKFAW…	590|332	12.9|14.7	-|-	27|19	27|19	10|10	10|10	0.574	0.452	21	15	-	-	1.936	1.295	15	11	*	-	0.835	1.047	19	15	-	-	0.901	0.58	15	11	-	-	CL11063.Contig2_All	78.51	0	gi|2826844|emb|CAA05280.1|	loxc homologue [Solanum lycopersicum]	69.33	0	sp|O24370|LOX21_SOLTU	Linoleate 13S-lipoxygenase 2-1, chloroplastic OS=Solanum tuberosum GN=LOX2.1 PE=1 SV=1	78.51	0	O49878	O49878_SOLLC Lipoxygenase (Fragment) OS=Solanum lycopersicum GN=loxc homologue PE=3 SV=1	-
240	CL10933.Contig3_All	195 1169 PREDICTED: protease 2-like isoform 1 [Vitis vinifera]	43872	PPIAKKVKHEMEMFGDVRVDNYFWLRDDSRSDPQVLAYLHEENAYTDHLMSGTKQLEDQMYIEIRGCLKEDDISAPLRRGSYYYYRRTLEGKEYAQHCRRLVADFGAQASVNDTMPTGPDAPPEHVLLDENVKAQEHAFYSIGAFKVSPNNTLVAYAEDTKGDEIYTVYVIDAESRKPTGKPLVGVTAELEWAGDDALVYTTRDEILRPDKVWFHKLGMEQSLDRCLYHEKDDMFSLDLAASESKKFLFVESESKTTRFVFYLDISKPEDGLIVLTPRLDGIDTSASHRGNHFFIKRRSDECFNSEILACPLDNKSATIVLLPHR	-|15	-|3.1	-|-	-|1	-|1	-|1	-|1	-	---	-	-	-	-	-	---	-	-	-	-	-	---	-	-	-	-	-	---	-	-	-	-	CL10933.Contig3_All	78.46	3e-154	gi|359484112|ref|XP_003633066.1|	PREDICTED: protease 2-like isoform 2 [Vitis vinifera]	31.99	6e-37	sp|P24555|PTRB_ECOLI	Protease 2 OS=Escherichia coli (strain K12) GN=ptrB PE=1 SV=2	78.46	3e-153	F6HVY4	F6HVY4_VITVI Putative uncharacterized protein OS=Vitis vinifera GN=VIT_10s0071g00940 PE=4 SV=1	MT0805
241	CL11462.Contig1_All	122 937 PREDICTED: proteasome subunit beta type-5 [Vitis vinifera] >gi|297738390|emb|CBI27591.3| unnamed protein product [Vitis vinifera]	34603	MKIDFSGLDPLAPIKGNSDDLQNEILATPSFKLPTTADFDGFQKAAVQMVKPAKGTTTLAFIFKEGVMVAADSRASMGGYISSQSVKKIIEINPYMLGTMAGGAADCQFWHRNLGIKCRLHELANKRRITVAGASKLLANILYSYRGMGLSVGTMIAGWDEQGPGLYYVDSEGGRLKGTRFSVGSGSPYAYGVLDSGYRFDMSVEEAAELARRAIYHATFRDGASGGVASVYHVGPVGWKKLSGDDVGELHYKYYPVEPTAVEQEMTEVSNA	181|222	18.8|18.8	-|-	8|8	8|8	3|3	3|3	0.705	0.865	2	4	-	-	2.546	0.896	2	3	-	-	1.211	1.277	2	4	-	-	1.812	0.893	2	3	-	-	CL11462.Contig1_All	96.55	8e-95	gi|14594931|emb|CAC43326.1|	putative beta5 proteasome subunit [Nicotiana tabacum]	83.09	6e-132	sp|O24361|PSB5_SPIOL	Proteasome subunit beta type-5 OS=Spinacia oleracea PE=2 SV=1	96.55	8e-94	Q93X31	Q93X31_TOBAC Putative beta5 proteasome subunit (Fragment) OS=Nicotiana tabacum GN=b5 PE=2 SV=1	SPAC4A8.13c
242	CL2420.Contig2_All	65 667 unnamed protein product [Vitis vinifera]	27618	APLUAGAAAAGTGVMGIDLVAGGKSKKTKRTAPKSNDIYLKLLVKLYRFLVRRTGSRFNAVVLKRLFMSRVNRPPLSLSRLIALMQGKEEQIAVLVGTVTDDIRVHEVPALKVTALRFTETARARIEKAGGECLTFDQLALRAPLGQNTVLLRGSRKAREAVKHFGPAPGVPHSHTKPYVRSKGRKFERARGRRNSKGFRV	168|191	13.4|17.4	1|1	5|6	1|2	2|3	1|2	---	---	1	-	-	-	---	---	-	-	-	-	---	---	1	-	-	-	---	---	-	-	-	-	CL2420.Contig2_All	89.84	9e-93	gi|296089720|emb|CBI39539.3|	unnamed protein product [Vitis vinifera]	83.7	2e-84	sp|O65729|RL18_CICAR	60S ribosomal protein L18 (Fragment) OS=Cicer arietinum GN=RPL18 PE=2 SV=1	89.84	7e-92	I1NB76	I1NB76_SOYBN Uncharacterized protein OS=Glycine max GN=Gma.1869 PE=4 SV=1	SPBC11C11.07
243	Unigene5132_All	115 414 uncharacterized protein LOC100306111 [Glycine max]	13200	MNTDITASTKPEYPVIDRNPPFTKTVANFNTLDYLRLSTITGVSVIVGYLSGIKPGIKGPSMVTGGLIGVMGGFMYAYQNSAGRLMGFFPNEGEVAKYKK	28|-	13.0|-	-|-	1|-	1|-	1|-	1|-	---	-	-	-	-	-	---	-	-	-	-	-	---	-	-	-	-	-	---	-	-	-	-	-	Unigene5132_All	90.91	7e-47	gi|460397039|ref|XP_004244076.1|	PREDICTED: uncharacterized protein LOC101260659 [Solanum lycopersicum]	-	-	-	-	90	5e-45	C6SY14	C6SY14_SOYBN Uncharacterized protein OS=Glycine max GN=Gma.55446 PE=4 SV=1	-
244	Unigene9435_All	139 837 hypothetical protein VITISV_003162 [Vitis vinifera]	33132	MAASFHLQSLQGPILHKSQFLGQTIFTNSTQKPSLTFPKHPFKNVPTAKFNLYEILGGRGLCNGEEGLQQELKKTVSKEASSLETTPSSEEKPAVLETSEDAFEKELLGLTGGFPGGEKGLKKFIEQNPPPKKEETSASFGFDQSLVKKPKPPELPLLLPGMIAIVKNPSNPFYMYCGIVQRITDGKAGVLFEGGNWDRLITFRLEELERREKGPPMVNPKSVILEEMVEKSS	109|34	6.0|6.0	-|-	5|1	5|1	1|1	1|1	0.82	---	4	1	-	-	0.7	---	3	1	-	-	1.027	---	4	1	-	-	0.354	---	3	1	*	-	Unigene9435_All	66.53	4e-69	gi|460399976|ref|XP_004245512.1|	PREDICTED: uncharacterized protein LOC101255121 [Solanum lycopersicum]	-	-	-	-	65.25	1e-70	F6HU24	F6HU24_VITVI Putative uncharacterized protein OS=Vitis vinifera GN=VIT_02s0025g01470 PE=4 SV=1	-
245	CL10043.Contig1_All	121 942 conserved hypothetical protein [Ricinus communis] >gi|223547577|gb|EEF49072.1| conserved hypothetical protein [Ricinus communis]	34504	MGSRYEVEVTITSAKDLKNVNWRHGKLKPYAVVWLDPSKKCSTRADEEGDASPYWDDKLLIPINSPIEDSTLYIDVVHANAAEDTKPLIGSAKLALRDVVDDVGLGSIAERTLELKRPSGRPQGKLEVKVSVREPRYRAPDPYYAPPYGVPPAGSRDFAPPPPPPYGSPYGAPPAYVAPPSGYPAYGAPPSYGQPSYVQPPHEQGGYYGQQGYVAEEKKKSKFGGMGTGLAVGAVAGALGGLALAEGVDALENNIADDAAERVEDDLGYDGDDY	65|36	5.1|5.1	-|-	2|1	2|1	1|1	1|1	1.59	---	2	1	-	-	---	---	-	1	-	-	0.601	---	2	1	-	-	---	---	-	1	-	-	CL10043.Contig1_All	72.18	1e-51	gi|460390195|ref|XP_004240724.1|	PREDICTED: uncharacterized protein LOC101263030 [Solanum lycopersicum]	-	-	-	-	70.68	1e-48	B9RIV0	B9RIV0_RICCO Putative uncharacterized protein OS=Ricinus communis GN=RCOM_1582990 PE=4 SV=1	-
246	CL1959.Contig21_All	100 1323 minus strand PREDICTED: beta-glucosidase 11-like isoform 1 [Vitis vinifera]	52732	ERKSCLLMVQLSSVVVVPQIFLLLHLATATLGVDHYTGADFPADFIFGSGTAAPQYEGAAFEEGRTPSIWDTFAHSGRTKGGNGDVACDGYHKYKEDIRLMVDTGLEAFRISISWSRLIPNGRGPINAKGLQYYDNLINELISNGIQPHVTLYHLDLPQALEDEYGGWLNRKIVKDFVEFADVCFKEFGDRVLHWTTLNEVNVAALGGYDEGIIAPGRCSVRSICAKGDSTTEPYTAVHNMLLAHSATAKLYKEKYKATQNGKVGLNIYILGLVPYTNSTEDVMAAQRAKDFYIGWVINPLIFGDYPDIVKKHAQTRIPAFTEDESEQIKGSLDFIGVNHYVTVFIKDDPSMKRDINDFYADMAAEIIFERGDAPAYEYPVMPWGLKGVLEYLKQVYGN…	35|36	1.7|4.4	-|-	1|2	1|2	1|2	1|2	---	1.12	1	2	-	-	---	0.982	1	2	-	-	---	1.056	1	2	-	-	---	1.144	1	2	-	-	CL1959.Contig21_All	66.67	5e-58	gi|359479910|ref|XP_002267643.2|	PREDICTED: beta-glucosidase 11-like [Vitis vinifera]	59.74	5e-133	sp|Q8S3J3|HIUH_SOYBN	Hydroxyisourate hydrolase OS=Glycine max GN=HIUH PE=1 SV=1	66.67	1e-12	D7U288	D7U288_VITVI Putative uncharacterized protein OS=Vitis vinifera GN=VIT_07s0005g00390 PE=3 SV=1	BH1923
247	Unigene31063_All	51 920 minus strand carboxymethylenebutenolidase, putative [Ricinus communis] >gi|223535899|gb|EEF37559.1| carboxymethylenebutenolidase, putative [Ricinus communis]	37191	LEAMISYGSRFFTKTLFNKSASTSSTAFSLVRARFPPSISLPLVRAMATDSAASSPFKKVQIQRDNTTFDAYVIGKDHAPGIVVLQEWWGVDFEIKNHAQKISQFDSGYKALIPDLYRGKVGLDVAEAQHLMDGLDWQGAVKDIEASVNWLKANGSQKIGVTGYCMGGALAIASSVLVPGVDAVVAFYGVPSPELADPVHAKAPVQAHFGELDSFVGFSDAKTGKALEEKLKASGVPHEVYIYPGVAHAFMNSSPEGVQRRKNMGLSEDAAAAVELAWTRFRTWMSRLLS	171|194	17.2|24.8	-|-	9|7	9|7	4|5	4|5	0.66	0.487	7	5	-	-	0.62	0.971	7	4	-	-	0.925	1.496	7	5	-	-	0.355	0.536	7	4	*	-	Unigene31063_All	91.89	2e-33	gi|353677897|dbj|BAL04603.1|	unnamed protein product, partial [Basella alba]	33.16	3e-19	sp|P46209|USF_AQUPY	Protein usf OS=Aquifex pyrophilus GN=usf PE=4 SV=1	91.89	2e-32	G5EKK2	G5EKK2_BASAL Gene, homology to At2g32520 (Fragment) OS=Basella alba PE=4 SV=1	RSp1339
248	CL3055.Contig7_All	2 1117 unnamed protein product [Vitis vinifera]	51868	SSVQFAKPRGVLIKPNTVUQMLALRPRLLPTAMISATANLSSPSLLALQRPRLTTPHNPKLSNEIFFTKRLSLSTRFPNASIRCFAAAAVDKVRVQNPIVEMDGDEMTRVIWKMIKDKLIFPYLELDVKYFDLGILNRDATDDKVTVESAEAALKYNVAIKCATITPDETRVKEFGLKAMWRSPNGTIRNILNGTVFREPILCRNIPRIVPGWKKPICIGRHAFGDQYRATDAIIKGSGKLKMIFVPENGDGPLELDVYDFKGPGIALAMYNVDQSIRAFAESSMAMAFGKKWPLYLSTKNTILKKYDGRFKDIFQEVYEENWKEKFEEHSIWYEHRLIDDMVAYALKSEGGYVWACKNYDGDVQSDLLAQG	19|-	5.9|-	-|-	2|-	1|-	2|-	1|-	---	-	-	-	-	-	---	-	-	-	-	-	---	-	-	-	-	-	---	-	-	-	-	-	CL3055.Contig7_All	90.76	7e-100	gi|380862986|gb|AFF18786.1|	NADP-specific isocitrate dehydrogenase, partial [Dimocarpus longan]	81.75	4e-143	sp|P50217|IDHC_SOLTU	Isocitrate dehydrogenase [NADP] OS=Solanum tuberosum GN=ICDH-1 PE=2 SV=1	89.3	3e-146	B4F9M9	B4F9M9_MAIZE Isocitrate dehydrogenase [NADP] OS=Zea mays PE=2 SV=1	SPAC6G10.08
249	Unigene34661_All	2 283 minus strand adenine nucleotide translocator [Cucumis melo subsp. melo]	12390	GMYDSLKPVLLTGKLQDSFFASFALGWLITNGAGLASYPIDTVRRRMMMTSGEAVKYKSSLDAFSQILKNEGAKSLFKGAGANILRAVAGAGVL	51|69	22.3|22.3	-|-	2|2	1|1	2|2	1|1	---	---	1	1	-	-	---	---	1	1	-	-	---	---	1	1	-	-	---	---	1	1	-	-	Unigene34661_All	98.94	5e-47	gi|307135850|gb|ADN33719.1|	adenine nucleotide translocator [Cucumis melo subsp. melo]	95.74	8e-46	sp|P25083|ADT1_SOLTU	ADP,ATP carrier protein, mitochondrial OS=Solanum tuberosum GN=ANT PE=2 SV=1	98.94	7e-46	E5GB77	E5GB77_CUCME Adenine nucleotide translocator OS=Cucumis melo subsp. melo PE=3 SV=1	-
250	CL5377.Contig2_All	2 271 60S ribosomal protein L6, putative [Ricinus communis] >gi|223535986|gb|EEF37645.1| 60S ribosomal protein L6, putative [Ricinus communis]	13703	PKFYPADDIKKPLSNKRKPKPTKLRASITPGTVLIILAGRVKGKRVVFLKQLSSGLLLATGPYKINGVPLRRVNQAYVIGTSTKVDISGV	120|69	30.0|30.0	-|-	3|2	1|1	2|2	1|1	---	---	1	1	-	-	---	---	1	1	-	-	---	---	1	1	-	-	---	---	1	1	-	-	CL5377.Contig2_All	93.33	8e-41	gi|255567646|ref|XP_002524802.1|	60S ribosomal protein L6, putative [Ricinus communis] >gi|223535986|gb|EEF37645.1| 60S ribosomal protein L6, putative [Ricinus communis]	92.22	2e-41	sp|P34091|RL6_MESCR	60S ribosomal protein L6 OS=Mesembryanthemum crystallinum GN=RPL6 PE=2 SV=1	93.33	1e-39	B9SFN3	B9SFN3_RICCO 60S ribosomal protein L6 OS=Ricinus communis GN=RCOM_0647900 PE=3 SV=1	YLR448w
251	Unigene24304_All	3 488 ribosomal protein S4 [Buddleja davidii]	23112	KKSQYRIRLEEKQKLRFHYGLTERQLLKYVHIAGKAKGSTGQVLLQLLEMRLDNILFRLGMASTIPAARQLVNHRHILVNGRIVDIPSYRCKPRDIITAKDEQKSRTLIQNSLNSSPHAEVPNHLTLHPFQYKGLVNQIIDSKWVGLKINELLVVEYYSRQT	218|214	19.8|14.8	-|-	6|5	6|5	3|2	3|2	1.134	0.994	3	2	-	-	1.388	1.686	3	3	-	-	1.219	0.988	3	2	-	-	0.956	1.186	3	3	-	-	Unigene24304_All	100	9e-85	gi|335060270|gb|AEH27429.1|	ribosomal protein S4 [Paulownia tomentosa]	95.68	4e-86	sp|Q8S8X2|RR4_ATRBE	30S ribosomal protein S4, chloroplastic OS=Atropa belladonna GN=rps4 PE=3 SV=1	98.15	1e-87	D3WAQ3	D3WAQ3_ANTMA 30S ribosomal protein S4, chloroplastic OS=Antirrhinum majus GN=rps4 PE=3 SV=1	slr0469
252	CL9665.Contig1_All	100 1935 PREDICTED: dihydroxy-acid dehydratase-like [Vitis vinifera]	76613	MQATFLLSQPPPPSTLKTHFPPSTAHLKTPSSFTIRASTTTTETDVPPPLPATTTKLNKYSSRITEPKSQGGSQAILYGVGLSDDDLHKPQVGISSVWYEGNTCNMHLLKLAEAVKEGVKEAGMVGFRFNTIGVSDAISMGTRGMCYSLQSRDLIADSIETVMAAQWYDGNISIPGCDKNMPGTIMAMGRLNRPSIMVYGGTIKPGHFQGHTYDIVSAFQVYGEYVSGSVSDEQRMNVVRNSCPGAGACGGMYTANTMASAIETMGMSLPYSSSTPAEDPLKLDECRLAGKYLLDLIKMDLKPRDIITSKSLRNAMVMVMALGGSTNAVLHLIAIARSVGLQLTLDDFQKVSDEVPFLADLKPSGKYVMEDVHKIGGTPAIIRYLLELGFLDGDCITVT…	105|55	9.2|7.2	-|-	8|3	8|3	4|3	4|3	1.063	---	4	1	-	-	2.482	---	2	1	-	-	0.835	---	3	1	-	-	---	---	1	1	-	-	CL9665.Contig1_All	91.67	1e-57	gi|226230822|gb|ACO39404.1|	hypothetical protein [Populus balsamifera] >gi|226230824|gb|ACO39405.1| hypothetical protein [Populus balsamifera] >gi|226230826|gb|ACO39406.1| hypothetical protein [Populus balsamifera] >gi|226230828|gb|ACO39407.1| hypothetical protein [Populus balsamifera] >gi|226230832|gb|ACO39409.1| hypothetical protein [Populus balsamifera] >gi|226230834|gb|ACO39410.1| hypothetical protein [Populus balsamife…	66.91	0	sp|Q7UJ69|ILVD_RHOBA	Dihydroxy-acid dehydratase OS=Rhodopirellula baltica (strain SH1) GN=ilvD PE=3 SV=2	86	0	C0P869	C0P869_MAIZE Putative uncharacterized protein OS=Zea mays PE=2 SV=1	SPAC17G8.06c
253	CL7006.Contig1_All	69 527 minus strand unknown [Populus trichocarpa x Populus deltoides] >CL7006.Contig2_All 69 527 unknown [Populus trichocarpa x Populus deltoides]	21324	MRLSFAFNVASIFLLLAFIALGSAKKSGDVAELQIGVKYKPKTCEVQAHKGDSVKVHYRGKLTDGTVFDSSFERGDPIEFELGSGQVIKGWDQGLLGMCLGEKRKLKIPSKLGYGEQGSPPTIPGGATLVFDTELVAVNGKTLSDGKSDDSEL	843|650	26.1|26.1	-|-	23|16	23|16	3|3	3|3	0.695	0.841	20	16	*	-	0.51	0.488	11	15	*	*	1.263	0.97	20	16	-	-	0.282	0.524	11	15	*	*	CL7006.Contig1_All	89.74	4e-58	gi|226531265|ref|NP_001148416.1|	LOC100282031 precursor [Zea mays] >gi|195616116|gb|ACG29888.1| FK506-binding protein 2-1 precursor [Zea mays] >gi|195619114|gb|ACG31387.1| FK506-binding protein 2-1 precursor [Zea mays]	88.89	9e-58	sp|Q38936|FK152_ARATH	Peptidyl-prolyl cis-trans isomerase FKBP15-2 OS=Arabidopsis thaliana GN=FKBP15-2 PE=2 SV=2	89.74	5e-57	B6SYF5	B6SYF5_MAIZE Peptidyl-prolyl cis-trans isomerase OS=Zea mays PE=2 SV=1	YDR519w
254	CL1745.Contig14_All	439 3729 hypothetical protein VITISV_043723 [Vitis vinifera]	138144	QTPNMEQFEAYFQRADVDRDGRISGNEAVAFLQASNLPRQVLAQIWMYADQNRVGFLGRSEFYNALKLVTVAQSKRDLTPELVKAALYGPASAKIPAPQINLAAAPGPQSNANAGPSPAQLGGPPTTTQGIGVSGLHGFLAQQSQVTRPPRPLPPSSGFQSQPVVSTQDMPGMGSMSVSHRPNSFDSLGGGADGSQAGLSSQVSSRSLIPSATQGDFGLMASPSTQPKAPEITGLLQSVSSKSNDTALLSSQVGKEDSKSPSATGNGFASDSVFGDVFSATPSQPKKNSTALTYPAGSIPASPTGNLTSSRDQATVKPSAVSQPPAFQAQQFQSTGKANQHVLAQKSSAFPVAAGQSQPPWPRMTQSDVQKYRKVFVQVDTDRDGKITGEQARNLFLSW…	187|-	2.3|-	2|-	3|-	3|-	2|-	2|-	2.48	-	2	-	-	-	---	-	1	-	-	-	---	-	1	-	-	-	1.806	-	2	-	-	-	CL1745.Contig14_All	70.73	9e-09	gi|147852292|emb|CAN80127.1|	hypothetical protein VITISV_041591 [Vitis vinifera]	48.53	1e-08	sp|Q9HGL2|YHLA_SCHPO	Uncharacterized calcium-binding protein C800.10c OS=Schizosaccharomyces pombe (strain 972 / ATCC 24843) GN=SPBC800.10c PE=4 SV=1	70.73	1e-07	A5AJ54	A5AJ54_VITVI Putative uncharacterized protein OS=Vitis vinifera GN=VITISV_041591 PE=4 SV=1	-
255	Unigene9388_All	141 746 minus strand pterin-4-alpha-carbinolamine dehydratase, putative [Ricinus communis] >gi|223550164|gb|EEF51651.1| pterin-4-alpha-carbinolamine dehydratase, putative [Ricinus communis]	27171	HFTFSPLLSLSKKPTYKPQNFLPLISTRNSARIQAADTDLVGDFGARDPFPAEIESNFAEKVLGNVSTEHKILIPNASALSLAQQECTPISQLQQPMSEDEAKKLLFKVVGWRLVHEEGGLKLQGLWKVRDLKCGEELINRITKTVESTGHLPTLHLEAPNQVRAELWTSSIGGLSMNDFIVAAKIDEIKISDLQPRQRVWA	29|40	6.9|6.9	-|-	1|2	1|2	1|1	1|1	---	0.456	-	2	-	-	---	1.712	-	2	-	-	---	1.099	-	2	-	-	---	0.844	-	2	-	-	Unigene9388_All	78.87	4e-25	gi|224159672|ref|XP_002338108.1|	predicted protein [Populus trichocarpa] >gi|222870922|gb|EEF08053.1| predicted protein [Populus trichocarpa]	36.11	9e-13	sp|B0JQV0|PHS_MICAN	Putative pterin-4-alpha-carbinolamine dehydratase OS=Microcystis aeruginosa (strain NIES-843) GN=MAE_39970 PE=3 SV=1	78.87	3e-24	B9PAT5	B9PAT5_POPTR Predicted protein OS=Populus trichocarpa GN=POPTRDRAFT_580976 PE=4 SV=1	VCA0827
256	CL8350.Contig1_All	148 420 minus strand cystatin [Solanum lycopersicum]	13929	GAIHQSEGSQNSVQFDDLARFAVDEHNKKQNTLLEFKKVTNVKEQVVAGTIYYITLVAAEGGKNKVYEAKVWVKPWLNFKEVQEFKLVGDA	-|31	-|22.0	-|-	-|1	-|1	-|1	-|1	-	---	-	1	-	-	-	---	-	-	-	-	-	---	-	1	-	-	-	---	-	-	-	-	CL8350.Contig1_All	76.19	5e-30	gi|1277164|gb|AAA97905.1|	cysteine proteinase inhibitor [Glycine max]	73.75	5e-27	sp|Q10992|CYTA_HELAN	Cysteine proteinase inhibitor A OS=Helianthus annuus PE=1 SV=1	76.19	7e-29	Q39840	Q39840_SOYBN Cysteine proteinase inhibitor (Fragment) OS=Glycine max PE=2 SV=1	-
257	Unigene13073_All	222 338 Synaptic glycoprotein SC2, putative [Ricinus communis] >gi|223529574|gb|EEF31524.1| Synaptic glycoprotein SC2, putative [Ricinus communis]	6064	MKVTVTTRSGRELIKGGLELSDSATVADLQEAIHKQTKK	47|26	51.3|51.3	-|-	1|1	1|1	1|1	1|1	---	---	-	-	-	-	---	---	1	-	-	-	---	---	-	-	-	-	---	---	1	-	-	-	Unigene13073_All	89.74	6e-13	gi|224112781|ref|XP_002316290.1|	predicted protein [Populus trichocarpa] >gi|222865330|gb|EEF02461.1| predicted protein [Populus trichocarpa]	71.79	3e-09	sp|Q9M2U2|ECR_ARATH	Very-long-chain enoyl-CoA reductase OS=Arabidopsis thaliana GN=ECR PE=2 SV=1	89.74	8e-12	A9PDL9	A9PDL9_POPTR Predicted protein OS=Populus trichocarpa GN=POPTRDRAFT_720621 PE=2 SV=1	-
258	CL13924.Contig1_All	139 840 PREDICTED: uncharacterized protein LOC100249118 [Vitis vinifera] >CL13924.Contig2_All 139 840 minus strand PREDICTED: uncharacterized protein LOC100249118 [Vitis vinifera]	28955	SSFSIRMSSSDSHANPNQIIEHIVLFKVKPSADPSAVNAMISNLNGLISLDPVLHISAGPVSRCRSNSLTFTHMLHSRYRSKTDLTSYSEHPTHVSVVSNYVKPIIDDIMAVDWVANDFSGSAVVSPSSALRLTILKLKEGAGESGTGEVLGVVRGIREKFPSIEQLTVGENFSPGRAKGFSICSIAVFKGLTELEELESQSELANEQKDKVREFLDGVLVLDYVVAASSTASV	50|-	6.8|-	-|-	1|-	1|-	1|-	1|-	---	-	1	-	-	-	---	-	1	-	-	-	---	-	1	-	-	-	---	-	1	-	-	-	CL13924.Contig1_All	65.6	4e-74	gi|460396313|ref|XP_004243720.1|	PREDICTED: uncharacterized protein LOC101256396 [Solanum lycopersicum]	-	-	-	-	59.9	3e-58	C6T5C9	C6T5C9_SOYBN Uncharacterized protein OS=Glycine max GN=Gma.58599 PE=2 SV=1	-
259	CL845.Contig8_All	1131 1307 minus strand PREDICTED: uncharacterized protein LOC100251108 [Vitis vinifera] >CL845.Contig12_All 1131 1307 minus strand PREDICTED: uncharacterized protein LOC100251108 [Vitis vinifera]	9216	VFRQEVMELVNRSGKYSKKFEGFTGTTDPLGKKLNNSKTRAELGWEPKYPSFAQFLESL	28|17	13.6|13.6	2|2	1|1	1|1	1|1	1|1	---	---	-	-	-	-	---	---	-	-	-	-	---	---	-	-	-	-	---	---	-	-	-	-	CL845.Contig8_All	87.5	2e-23	gi|460390909|ref|XP_004241067.1|	PREDICTED: uncharacterized protein LOC101266524 [Solanum lycopersicum]	-	-	-	-	83.33	1e-19	D7LCE8	D7LCE8_ARALL Putative uncharacterized protein OS=Arabidopsis lyrata subsp. lyrata GN=ARALYDRAFT_903150 PE=4 SV=1	-
260	CL623.Contig4_All	111 524 histone h2a, putative [Ricinus communis] >gi|223527095|gb|EEF29276.1| histone h2a, putative [Ricinus communis]	20314	GGRGKPKSSKSVSRSSKAGLQFPVGRIARFLKAGKYAERVGAGAPVYLSAVLEYLAAEVLELAGNAARDNKKNRIIPRHLLLAVRNDEELGKLLAGVTIAHGGVLPNINPVLLPKKSDKAAEKPTKSPSKATKSPKKA	344|289	23.2|23.2	3|3	12|14	5|7	2|2	1|1	0.391	0.521	5	4	*	*	1.642	0.909	3	4	-	-	0.952	1.141	5	5	-	-	0.578	0.422	3	4	-	*	CL623.Contig4_All	92.55	4e-32	gi|62286683|sp|Q9M531.1|H2A_EUPES	RecName: Full=Histone H2A >gi|7649159|gb|AAF65769.1|AF242311_1 histone H2A [Euphorbia esula]	92.55	1e-32	sp|Q9M531|H2A_EUPES	Histone H2A OS=Euphorbia esula PE=2 SV=1	91.84	5e-33	Q9ST30	Q9ST30_SOLME Histone H2A (Fragment) OS=Solanum melongena GN=EEF20 PE=2 SV=1	SPAC19G12.06c
261	CL796.Contig3_All	2 217 minus strand hypothetical protein RCOM_1598450 [Ricinus communis] >gi|223551261|gb|EEF52747.1| hypothetical protein RCOM_1598450 [Ricinus communis]	8597	TSPLGPDPKELPKNVAKVFPFDSTGNIRGNANTGINITGSLGSLNAVEDQVNMLPGSVVFTISPPPSSLPLP	-|21	-|12.5	-|-	-|1	-|1	-|1	-|1	-	---	-	-	-	-	-	---	-	-	-	-	-	---	-	-	-	-	-	---	-	-	-	-	CL796.Contig3_All	-	-	-	-	-	-	-	-	-	-	-	-	-
262	CL4243.Contig3_All	2 502 minus strand putative ferredoxin-dependent glutamate synthase 1 [Capsicum annuum]	20545	QKSETAYSIYQQHLANRPVNVLRDLLEFRSDCSPIPVGRVEPASSIVQRFCTGGMSLGAISRETHEAIAIAMNRLGGKSNSGEGGEDPIRWSPLTDVVDGYSPTLPHLKGLQNGDTATSAIKQVASGRFGVTPTFLANADQLEIKIAQGAKPGEGGQLPGKKVSAYI	-|120	-|21.6	-|-	-|4	-|1	-|2	-|1	-	---	-	1	-	-	-	---	-	-	-	-	-	---	-	1	-	-	-	---	-	-	-	-	CL4243.Contig3_All	98.44	4e-29	gi|356600161|gb|AET22433.1|	glutamate synthase [Camellia sinensis]	91.02	6e-88	sp|Q9ZNZ7|GLTB1_ARATH	Ferredoxin-dependent glutamate synthase 1, chloroplastic OS=Arabidopsis thaliana GN=GLU1 PE=1 SV=2	95.81	2e-89	Q7M242	Q7M242_TOBAC Glutamate synthase (Ferredoxin) (Clone C(35)) (Fragment) OS=Nicotiana tabacum PE=4 SV=1	alr4344_2
263	CL11278.Contig2_All	108 1757 PREDICTED: ATP synthase subunit beta, mitochondrial-like [Vitis vinifera]	66491	MASRRLLASFLRSSAARRPRSPFSTPKPSPRPSPAGHFLHRFAAHYSTSAAAASPPPSKSPSGGGGGKITDEFTGQGSIGKVCQVIGAVVDVRFDEGLPPILTALEVLDNQIRLVLEVAQHLGESVVRCIAMDGTEGLVRGQRVLNTGSPITVPVGRATLGRIINVIGEPIDERGEIKTEHFLPIHREAPSFVEQATEQQILVTGIKVVDLLAPYQRGGKIGLFGGAGVGKTVLIMELINNVAKAHGGFSVFAGVGERTREGNDLYREMIESGVIKLGDKQAESKCALVYGQMNEPPGARARVGLTGLTVAEHFRDAEGQDVLLFIDNIFRFTQANSEVSALLGRIPSAVGYQPTLATDLGGLQERITTTKKGSITSVQAIYVPADDLTDPAPATTFAH…	3138|2440	43.6|40.7	-|-	95|72	86|66	16|15	15|14	1.564	1.651	68	50	-	-	1.253	1.193	57	47	*	*	0.805	0.744	66	50	-	*	1.417	1.424	57	47	-	*	CL11278.Contig2_All	98.57	0	gi|297737737|emb|CBI26938.3|	unnamed protein product [Vitis vinifera]	96.89	0	sp|P17614|ATPBM_NICPL	ATP synthase subunit beta, mitochondrial OS=Nicotiana plumbaginifolia GN=ATPB PE=1 SV=1	97.3	0	F6HFL0	F6HFL0_VITVI ATP synthase subunit beta OS=Vitis vinifera GN=VIT_01s0011g04490 PE=3 SV=1	SPAC222.12c
264	CL5671.Contig1_All	630 1520 minus strand PREDICTED: mitochondrial carnitine/acylcarnitine carrier-like protein-like isoform 1 [Vitis vinifera] >CL5671.Contig2_All 537 1427 minus strand PREDICTED: mitochondrial carnitine/acylcarnitine carrier-like protein-like	36196	MGDVAKDLTAGTVGGAAQLICGHPFDTIKVKLQSQPAPRPGQPPKYAGAIDAVKQTVAAEGPRGLYKGMGAPLATVAAFNAVLFTVRGQMEALLRSAPGTPLTVSQQVVCGAGAGVAVSFLACPTELIKCRLQAQSALATSGSGAVAVKYGGPMDVARHVLRSEGGARGLFKGLVPTFAREVPGNAAMFGVYEALKQYLAGGQDTSSLGRGSLILAGGLAGASFWVSVYPTDVVKSVLQVDDYKNPKFSGSIDAFRKILKSEGIKGLYKGFGPAMARSVPANAACFLAYEVTRSSLG	37|88	8.1|5.4	1|1	2|2	2|2	2|1	2|1	---	0.561	-	2	-	-	---	0.766	1	2	-	-	---	1.208	-	2	-	-	---	0.511	1	2	-	-	CL5671.Contig1_All	90.24	4e-125	gi|225427213|ref|XP_002280380.1|	PREDICTED: mitochondrial carnitine/acylcarnitine carrier-like protein-like isoform 1 [Vitis vinifera]	83	5e-123	sp|Q93XM7|MCAT_ARATH	Mitochondrial carnitine/acylcarnitine carrier-like protein OS=Arabidopsis thaliana GN=BOU PE=1 SV=1	90.24	7e-124	F6HT95	F6HT95_VITVI Putative uncharacterized protein OS=Vitis vinifera GN=VIT_02s0012g01250 PE=3 SV=1	-
265	CL1336.Contig1_All	99 2063 soluble acid invertase 1 [Orobanche ramosa]	83643	MATTSSHAPPYDLERATSYTPIPAGPPAEQPRTKKLFASILFSSFFLLSLILLVINQQPDPQAKLNDASAQNPSTSAHSFSPARPVIEPPSRGVEQGVSEKVFRRVSGGNLSFAWTNVMLSWQRTAYHFQPEKNWMNDPNGPLFYKGWYHLFYQYNPDSAVWGNISWGHAVSRDLVHWLHLPFAMVPDQWYDINGVWTGSATILPDGRIMMLYTGDTYDVVQVQCLAYPANLSDPLLLKWVKDPSNPVLVPPTGIGHKDFRDPTTAWLSPDGDKWRTTIGSKVNKTGISIVYETKDFIKYELLDGYLHEVPGTGMWECIDFYPVSLTEANGLDTSVNGPGIKHVMKASLDDDKNDYYALGTYDPIKNKWTPDDPELDVGIGLRYDYGKYYASKTFYDQN…	106|295	9.0|10.4	-|-	6|8	1|2	4|4	1|1	---	0.321	1	2	-	-	---	---	-	1	-	-	---	1.231	1	2	-	-	---	---	-	1	-	-	CL1336.Contig1_All	82.75	0	gi|294612070|gb|ADF27779.1|	soluble acid invertase 1 [Orobanche ramosa]	71.89	0	sp|P29000|INVA_SOLLC	Acid beta-fructofuranosidase OS=Solanum lycopersicum GN=TIV1 PE=2 SV=1	82.75	0	D5LY28	D5LY28_ORORA Soluble acid invertase 1 OS=Orobanche ramosa GN=SAI1 PE=2 SV=1	BS_sacC
266	CL4425.Contig1_All	82 414 minus strand 60S ribosomal protein L30, putative [Ricinus communis] >gi|223531581|gb|EEF33410.1| 60S ribosomal protein L30, putative [Ricinus communis] >Unigene8576_All 87 419 minus strand 60S ribosomal protein L30, putative [Ricinus	16898	VSAGKKTKKTHESINNRLALVMKSGKYTLGYKTVLKTLRNTKGKLILISNNCPPLRKSEIEYYAMLAKVGVHHYNGNNVDLGTACGKYFRVSCLSIVDPGDSDIIKSLPGD	36|-	9.9|-	-|-	2|-	2|-	1|-	1|-	---	-	1	-	-	-	---	-	-	-	-	-	---	-	1	-	-	-	---	-	-	-	-	-	CL4425.Contig1_All	94.5	2e-55	gi|225438619|ref|XP_002281037.1|	PREDICTED: 60S ribosomal protein L30 [Vitis vinifera] >gi|296082469|emb|CBI21474.3| unnamed protein product [Vitis vinifera]	91.74	3e-54	sp|O49884|RL30_LUPLU	60S ribosomal protein L30 OS=Lupinus luteus GN=RPL30 PE=3 SV=1	94.5	2e-54	D7SW25	D7SW25_VITVI Putative uncharacterized protein OS=Vitis vinifera GN=VIT_07s0031g01230 PE=4 SV=1	SPAC9G1.03c
267	CL12192.Contig1_All	111 785 minus strand unnamed protein product [Vitis vinifera]	28333	LQNYNSSRNLSPSLSUMEKAEAAIPTAEKPDSSSSPSPAHHQIVPPGLTHEEFEDLKPAVIQFHNYQVSSGQCSSLLAQRVRAPPQDVWSIVRRFDKPQTYKHFIKSCNVREDFSMTVGNVRDVNVVSGLPAATSTERLDILDEERRVMGFSSIGGDHRLKSYRSVTTVHEVEHREVGIYTIVLESYVVDVPDGNTEEDTRLFADTVVKLNLQKLASVAESRVYD	-|38	-|7.1	-|-	-|1	-|1	-|1	-|1	-	---	-	1	-	-	-	---	-	1	-	-	-	---	-	1	-	-	-	---	-	1	-	-	CL12192.Contig1_All	72.63	1e-67	gi|460392723|ref|XP_004241963.1|	PREDICTED: abscisic acid receptor PYR1-like isoform 2 [Solanum lycopersicum]	68.54	8e-63	sp|O49686|PYR1_ARATH	Abscisic acid receptor PYR1 OS=Arabidopsis thaliana GN=PYR1 PE=1 SV=1	71.66	1e-69	B9MU20	B9MU20_POPTR Predicted protein OS=Populus trichocarpa GN=POPTRDRAFT_590008 PE=4 SV=1	-
268	CL7508.Contig9_All	312 3152 minus strand PREDICTED: villin-2-like [Vitis vinifera]	128301	MSSSAKALEPAFLGAGQKVGTEIWRIENFQPVPLPKSDYGKFYSGDSYIILQTSSGKGGAYLYDIHFWLGKDTSQDEAGTAAIKTVELDAVLGGRAVQYRELQGHESDKFLSYFKPCIIPLEGGVASGFKKPEEEEFETRLYICRGKRVVRLKQVPFSRSSLNHDDVFILDTKGKIYQFNGANSNIQERAKALEVIQFLKEKYHEGKCDVAIVDDGKLQAETDSGEFWVLFGGFAPIGKKVATEDDIIPEKTPAQLYSIVDGLVKSLDGELSKSILENNKCYLLDCGAEVFVWVGRVTQVDERKAAIQAAEDFVASQNRPKSTHITRLIQGYETHSFKSNFDSWPSGSAPSVAEEGRGKVAALLKQQGGAMKGANKSAPVNEEVPPLLEGGGKIEVWRI…	368|425	8.6|14.7	-|-	16|18	8|3	6|10	2|2	0.966	0.625	5	3	-	-	---	0.769	-	2	-	-	0.794	0.947	4	3	-	-	---	0.502	1	2	-	-	CL7508.Contig9_All	85.99	1e-130	gi|357509713|ref|XP_003625145.1|	Villin-2 [Medicago truncatula] >gi|355500160|gb|AES81363.1| Villin-2 [Medicago truncatula]	76.32	0	sp|O81645|VILI3_ARATH	Villin-3 OS=Arabidopsis thaliana GN=VLN3 PE=1 SV=2	85.99	1e-129	G7KTI5	G7KTI5_MEDTR Villin-2 OS=Medicago truncatula GN=MTR_7g091460 PE=4 SV=1	-
269	Unigene2743_All	151 627 40S ribosomal protein S11, putative [Ricinus communis] >gi|223527780|gb|EEF29881.1| 40S ribosomal protein S11, putative [Ricinus communis] >Unigene27651_All 154 630 40S ribosomal protein S11, putative [Ricinus communis] >gi|223527780|g	24863	MAEQTEKAFLKQPKVFLCSKKTGKGKAPGKGGNRYWKSIGLSFKTPREAIEGTYIDKKCPFTGNASIRGRILAGTCHSAKMMRTIIVRRNYLHWVKKYQRYEKRHSNIPAHISPCFRVKEGDHVIIGQCRPLSKTVRFNVLKVVPAGSSGRGKKAFTAM	17|20	4.4|4.4	1|1	2|1	2|1	1|1	1|1	---	---	-	-	-	-	---	---	-	-	-	-	---	---	-	-	-	-	---	---	-	-	-	-	Unigene2743_All	93.79	2e-69	gi|225430422|ref|XP_002285422.1|	PREDICTED: 40S ribosomal protein S11 [Vitis vinifera] >gi|296082102|emb|CBI21107.3| unnamed protein product [Vitis vinifera]	90.57	2e-73	sp|Q9M5M1|RS11_EUPES	40S ribosomal protein S11 OS=Euphorbia esula GN=RPS11 PE=2 SV=1	93.79	2e-68	D7SV08	D7SV08_VITVI Putative uncharacterized protein OS=Vitis vinifera GN=VIT_04s0008g06220 PE=3 SV=1	SPAC31G5.03
270	CL4390.Contig1_All	94 453 minus strand putative H-type thioredoxin [Citrus hybrid cultivar]	17424	MATSEAEGQVIGCHTVEAWSEQLQKGNDNKKLIVVDFTASWCGPCRFIAPFFAELAKKLPDVTFLKVDVDELKSVARDWAVEAMPTFIFLKDGKILDRVVGAKKEELQQTIAKHLSPVTA	85|182	27.5|27.5	1|1	4|7	4|7	3|3	3|3	0.716	0.801	3	6	-	-	0.898	1.012	3	6	-	-	1.967	1.967	3	5	*	*	2.342	1.799	3	6	-	-	CL4390.Contig1_All	83.19	2e-52	gi|255587090|ref|XP_002534131.1|	Thioredoxin H-type [Ricinus communis] >gi|11135282|sp|Q43636.1|TRXH_RICCO RecName: Full=Thioredoxin H-type; Short=Trx-H >gi|1255954|emb|CAA94534.1| thioredoxin [Ricinus communis] >gi|223525803|gb|EEF28248.1| Thioredoxin H-type [Ricinus communis]	83.19	8e-53	sp|Q43636|TRXH_RICCO	Thioredoxin H-type OS=Ricinus communis PE=3 SV=1	83.19	3e-51	B9T7B2	B9T7B2_RICCO Thioredoxin OS=Ricinus communis GN=RCOM_0387230 PE=3 SV=1	SPAC7D4.07c
271	Unigene27229_All	147 1016 PREDICTED: histone deacetylase HDT1-like [Vitis vinifera]	41698	MEFWGVEVKPGEPLKVQPEFGKLIHISQAALGEVKDVKGAKHVPLRLKIDAKNFIIGALSAEDRTQLMFDLVFEREFELSHDWKNGSVYFLGYIADDPVSDGEDFSEFEDESEDEPVDTHENGEIKPKLGDVKAAKSAAAAAAKAGTKKEEQSGSDDDGDGSESDSDDEMAFGGSLQGGSSDVSGEDSEEDDSSEEELPKVQQSKKRSAESAQETPVPAKKAKSSTPDKTGNKKGHTGTPFPSKAAGKTPASTKSKEQTPKSGGQLSCKSCSKSFTSENALQSHSKAKHG	56|-	4.1|-	-|-	3|-	3|-	1|-	1|-	0.004	-	2	-	-	-	---	-	1	-	-	-	6.305	-	2	-	-	-	---	-	1	-	-	-	Unigene27229_All	74.26	2e-39	gi|460411221|ref|XP_004251012.1|	PREDICTED: histone deacetylase HDT2-like [Solanum lycopersicum]	64.13	6e-22	sp|Q8LJS2|HDT1_SOYBN	Histone deacetylase HDT1 OS=Glycine max GN=HDT1 PE=2 SV=1	73.27	2e-38	Q307Z5	Q307Z5_SOLTU Deacetylase-like protein OS=Solanum tuberosum PE=2 SV=1	-
272	CL3724.Contig1_All	376 873 minus strand unknown [Lotus japonicus] >CL3724.Contig2_All 274 771 minus strand unknown [Lotus japonicus]	20399	MALVTTAEVCDANPQLIVSGELRALHPSFQIYGRRQVFSGPVVTLKVFEDNVLVREFLEEKGNGRVLVVDGGGSLRCAILGGNPVVQAQNNGWAGIIVNGCIRDVDEINGCDIGVRALASHPVKANKKGIGEKHVPVNIAGTRICDGEWLYADTDGILVSKTELSV	-|67	-|13.3	-|1	-|4	-|4	-|2	-|2	-	---	-	1	-	-	-	---	-	1	-	-	-	---	-	1	-	-	-	---	-	1	-	-	CL3724.Contig1_All	93.37	1e-86	gi|460382374|ref|XP_004236914.1|	PREDICTED: regulator of ribonuclease-like protein 2-like [Solanum lycopersicum]	86.75	2e-81	sp|Q9FFE0|RRAA2_ARATH	Regulator of ribonuclease-like protein 2 OS=Arabidopsis thaliana GN=At5g16450 PE=2 SV=1	93.37	2e-85	F4YFB8	F4YFB8_CAMSI Dimethylmenaquinone methyltransferase OS=Camellia sinensis PE=2 SV=1	RSc1354
273	CL1745.Contig4_All	453 1886 hypothetical protein VITISV_043723 [Vitis vinifera]	56196	QTPNMEQFEAYFQRADVDRDGRISGNEAVAFLQASNLPRQVLAQIWMYADQNRVGFLGRSEFYNALKLVTVAQSKRDLTPELVKAALYGPASAKIPAPQINLAAAPGPQSNANAGPSPAQLGGPPTTTQGIGVSGLHGFLAQQSQVTRPPRPLPPSSGFQSQPVVSTQDMPGMGSMSVSHRPNSFDSLGGGADGSQAGLSSQVSSRSLIPSATQGDFGLMASPSTQPKAPEITGLLQSASSKTNDTALLSSQVGKEDSKSPSAAGNGFASDSVFGDVFSATPSQPKKNSTALTYPAGSIPASPTGNLTSSRDQATVKPSAVSQPPAFQAQQFQSTGKANQHVLAQKSSAFPVAAGQSQPPWPRMTQSDVQKYRKVFVQVDTDRDGKITGEQARNLFLSW…	-|146	-|12.8	-|1	-|5	-|5	-|4	-|4	-	0.965	-	3	-	-	-	0.811	-	2	-	-	-	1.032	-	3	-	-	-	0.806	-	2	-	-	CL1745.Contig4_All	78.69	4e-55	gi|255539262|ref|XP_002510696.1|	calcium ion binding protein, putative [Ricinus communis] >gi|223551397|gb|EEF52883.1| calcium ion binding protein, putative [Ricinus communis]	48.53	8e-09	sp|Q9HGL2|YHLA_SCHPO	Uncharacterized calcium-binding protein C800.10c OS=Schizosaccharomyces pombe (strain 972 / ATCC 24843) GN=SPBC800.10c PE=4 SV=1	78.69	4e-54	B9R8Q3	B9R8Q3_RICCO Calcium ion binding protein, putative OS=Ricinus communis GN=RCOM_1601620 PE=4 SV=1	-
274	CL1571.Contig1_All	102 956 PREDICTED: GDSL esterase/lipase At1g33811 [Vitis vinifera] >gi|296089405|emb|CBI39224.3| unnamed protein product [Vitis vinifera]	35919	AQLLGFPNYIPPCASARGRALLQGANYASGASGIRDETGNNLGDHMSMNQQVDSFAATVQQLRRYFSGDVNALGAYLRKCIFYSGLGSNDYLNNYFMRDYYSTSSEYTPKAYAASLVQDYTKQLTELYNLGARKVIVTAVGQIGCIPYQLARNNGNGSRCNEEINSAIVLFNTGLKRLVDRFNKGQLPGAKFVYLDSFRSSQDLVQNAKTYGFEVVNEGCCGVGRNNGQITCLPLQTPCDNRRKYLFWDAFHPTEAANILLAKKAYSSNSKSYAYPISIQQLAML	-|43	-|5.6	-|1	-|2	-|2	-|1	-|1	-	---	-	1	-	-	-	---	-	-	-	-	-	---	-	1	-	-	-	---	-	-	-	-	CL1571.Contig1_All	77.89	4e-125	gi|225460231|ref|XP_002278194.1|	PREDICTED: GDSL esterase/lipase At1g33811 [Vitis vinifera] >gi|296089405|emb|CBI39224.3| unnamed protein product [Vitis vinifera]	69.1	1e-110	sp|Q8L5Z1|GDL17_ARATH	GDSL esterase/lipase At1g33811 OS=Arabidopsis thaliana GN=At1g33811 PE=2 SV=1	77.89	4e-124	D7U910	D7U910_VITVI Putative uncharacterized protein OS=Vitis vinifera GN=VIT_18s0041g02160 PE=4 SV=1	all3634
275	CL11210.Contig1_All	196 885 DUF26 domain-containing protein 1 precursor, putative [Ricinus communis] >gi|223534713|gb|EEF36405.1| DUF26 domain-containing protein 1 precursor, putative [Ricinus communis]	27925	WVFLIILSHFVSPSSSALESFIYMGCSQLKYSPGTPYESNVNSILSSIVNSASFSNFNNFKISLPGSAPSDVVYGLFQCRGDLSNSDCHDCVSNAVSRLGASCVGSSGGALQLDGCFVRYDNTSFLGAEDKTVVSDKCGPIGDDSDLLTRRDAVLSYLTAGGQFFRVGGSGKVQGVAQCVQDLSMSECQDCLSEAIQRLKTECGSSAWGDMFLGKCYARYSERGYTSKSG	-|30	-|6.5	-|3	-|1	-|1	-|1	-|1	-	---	-	1	-	-	-	---	-	1	-	-	-	---	-	1	-	-	-	---	-	1	-	-	CL11210.Contig1_All	75.86	1e-19	gi|296087089|emb|CBI33463.3|	unnamed protein product [Vitis vinifera]	59.48	4e-60	sp|Q9ZU94|CRR12_ARATH	Cysteine-rich repeat secretory protein 12 OS=Arabidopsis thaliana GN=CRRSP12 PE=2 SV=2	65.38	1e-67	B9SJ12	B9SJ12_RICCO DUF26 domain-containing protein 1, putative OS=Ricinus communis GN=RCOM_0597560 PE=4 SV=1	-
276	CL12858.Contig2_All	168 1040 PREDICTED: F-box protein SKIP19 [Vitis vinifera] >gi|147853333|emb|CAN82327.1| hypothetical protein VITISV_041807 [Vitis vinifera] >gi|297740788|emb|CBI30970.3| unnamed protein product [Vitis vinifera] >CL12858.Contig5_All 168 1040 PR	37059	WIELPRDLTANILHRLGAIDILESAQKVCTTWRAVCQDPAMWRVIDIRNLDCVHGSLYDLNIMCRHAVDRSQGQLIEIHIEYFGDDEMLHYICERSSHLRHLTLASCYDISGKALSEAVKKLPELEELHLIIMPSILAGDIENIGISCPMLKSFTFNDRGYRYPLMDGNECAFAVAKNMPNLCHLRLFANEIKNAGLEAVLDGCPHLESLDLRQCFGVDLGGDLGKRCQQIKDLRRPFDSIADYEWYAGESCDEPYYSSGYSDDYSFGDYDDYTNPFSSEYFPDNEAWFFD	24|-	2.1|-	1|-	1|-	1|-	1|-	1|-	---	-	-	-	-	-	---	-	-	-	-	-	---	-	-	-	-	-	---	-	-	-	-	-	CL12858.Contig2_All	65.12	7e-10	gi|297813935|ref|XP_002874851.1|	hypothetical protein ARALYDRAFT_911820 [Arabidopsis lyrata subsp. lyrata] >gi|297320688|gb|EFH51110.1| hypothetical protein ARALYDRAFT_911820 [Arabidopsis lyrata subsp. lyrata]	50	1e-16	sp|Q9S9V9|FBL23_ARATH	Putative F-box/LRR-repeat protein 23 OS=Arabidopsis thaliana GN=FBL23 PE=4 SV=1	65.12	7e-09	D7M2K7	D7M2K7_ARALL Putative uncharacterized protein OS=Arabidopsis lyrata subsp. lyrata GN=ARALYDRAFT_911820 PE=4 SV=1	-
277	CL7247.Contig3_All	128 1426 minus strand monodehydroascorbate reductase [Acanthus ebracteatus]	58092	MAEKSFKYVILGGGVAAGYAAREFAKHGVKPGELAIISKEAVAPYERPALSKAYLFPEGTARLPGFHVCVGSGGERLLPEWYSEKGISLILSTEIVKADLASKTLISAAGETFKYQILIIATGSTVIKLTDFGVKGADAKNIFYLREIDDADKLVEAIKAKKNGKAVIVGGGYIGLELSAALKINNIDVSMVYPEPWCMPRLFTAGIAAFYEGYYANKGINIIKGTVAVGFGTNENGEVTDVKLKDGRVLEADIVVVGVGGRPLTTLFKGQVEEEKGGIKTDAFFKTSIPDVYAVGDVATFPLKLFNEIRRVEHVDHARKSAEQAVKAVFATEQGTSIDEYDYLPYFYSRAFDLSWQFYGDNVGDTVLFGDSSPTSPTHKFGSYWIKDGKVVGAFLESG…	600|690	23.6|20.1	-|-	24|23	3|2	7|6	2|1	1.62	1.248	2	2	-	-	1.291	1.496	2	2	-	-	1.007	0.942	2	2	-	-	2.055	1.732	2	2	-	-	CL7247.Contig3_All	90.3	0	gi|117067068|gb|ABK32073.1|	monodehydroascorbate reductase [Acanthus ebracteatus]	87.3	0	sp|Q43497|MDAR_SOLLC	Monodehydroascorbate reductase OS=Solanum lycopersicum GN=AFRR PE=1 SV=1	90.3	0	A0MQ80	A0MQ80_ACAEB Monodehydroascorbate reductase OS=Acanthus ebracteatus PE=2 SV=1	Cgl2652
278	CL1346.Contig1_All	81 1310 minus strand PREDICTED: ATP phosphoribosyltransferase [Vitis vinifera]	51145	QCPTASISLSSTPSSSSRDCVSVKFSVSCCSGASPVTVVNGNVDKKPSERNEVRLGLPSKGRMATDTLDLLKDCQLSVRQVNPRQYVAEIPQISNLEVWFQRPKDVVRKLVSGDLDLGIVGLDTVEEYGQGNKDLIVVHDALDYGDCRLSLAIPKYGIFENVNSLKELAQMPQWTPERPLRVATGFTYLGPKFMKENGLNHVTFSTADGALEAAPAMGIADAIVDLVSSGTTLRENNLKEIEGGVILESQAVLVASRKSLIQRKGVLDITHEMLERLEAHLRAVGQFTVUIICLLILSSVAWYSCYVLFSWQVTANMRGSSAEEVAERVLNQPSLSGLQGPTVSPVFCKRNGRVAADYFAIVICVPKQALYKSVQQLRMIGGSGVLVSPLTYIFDEETP…	19|-	2.7|-	3|-	1|-	1|-	1|-	1|-	---	-	-	-	-	-	---	-	-	-	-	-	---	-	-	-	-	-	---	-	-	-	-	-	CL1346.Contig1_All	88.63	2e-109	gi|413968594|gb|AFW90634.1|	chloroplast ATP phosphoribosyl transferase [Solanum tuberosum]	36.13	2e-14	sp|B0SDL3|HIS1_LEPBA	ATP phosphoribosyltransferase OS=Leptospira biflexa serovar Patoc (strain Patoc 1 / Ames) GN=hisG PE=3 SV=1	88.3	2e-42	B7FG77	B7FG77_MEDTR Putative uncharacterized protein OS=Medicago truncatula PE=4 SV=1	HI0468
279	Unigene33653_All	99 773 minus strand anganese superoxide dismutase [Sesamum indicum]	30658	MALRTLITRKTLRTAPLGFRGLQTFSLPDLPYDYGDLEPAISGEIMLLHHQKHHQAYITNYNKALEQLDSAITKGDASTVVKLQGAIKFNGGGHVNHSIFWKNLAPVREGGGEPPKGSLGWAIDNHFGSLDALVQKMNAEGAALQGSGWVWLGVDKEFKRLVVETTANQDPLVTKGPSLVPLLGIDVWEHAYYLQYKNVRPDYLKNIWKVINWKYASEVYDKECP	146|127	20.4|11.6	-|-	6|4	2|2	3|2	1|1	1.333	---	2	1	-	-	0.844	---	2	1	-	-	0.87	---	2	1	-	-	0.955	---	2	1	-	-	Unigene33653_All	93.17	9e-109	gi|29465854|gb|AAN15216.1|	manganese superoxide dismutase [Avicennia marina]	87.44	3e-105	sp|P35017|SODM_HEVBR	Superoxide dismutase [Mn], mitochondrial OS=Hevea brasiliensis GN=SODA PE=2 SV=1	93.17	9e-108	Q84V26	Q84V26_AVIMR Superoxide dismutase OS=Avicennia marina PE=2 SV=1	CPn0057
280	CL14205.Contig2_All	102 989 PREDICTED: probable rhamnose biosynthetic enzyme 1 [Vitis vinifera]	39638	MGATANGSAAQPLKFLIYGRTGWIGGLLGKLCEAQNIDYVYGSGRLENRASLEADIASARPTHVFNAAGVTGRPNVDWCESHKVETIRTNVVGTLTLADVCREKGLVLINYATGCIFEYDSEHPLGSGIGFKEEDKPNFIGSFYSKTKAMVEDLLKNYENVCTLRVRMPISSDLSNPRNFITKITRYEKVVNIPNSMTILDELLPISIEMAKRNLTGIWNFTNPGVVSHNEILEMYREYIDPNFTWKNFTLEEQAKVIIAPRSNNELDATKLKQEFPELLPIKDSLIQYVFKPNRK	35|25	2.7|2.7	1|1	1|1	1|1	1|1	1|1	---	---	1	-	-	-	---	---	1	-	-	-	---	---	1	-	-	-	---	---	1	-	-	-	CL14205.Contig2_All	90.27	5e-160	gi|225426743|ref|XP_002282339.1|	PREDICTED: probable rhamnose biosynthetic enzyme 1 [Vitis vinifera]	80.07	4e-130	sp|Q9LH76|RHM3_ARATH	Probable rhamnose biosynthetic enzyme 3 OS=Arabidopsis thaliana GN=RHM3 PE=1 SV=1	90.27	5e-159	F6HUI7	F6HUI7_VITVI Putative uncharacterized protein OS=Vitis vinifera GN=VIT_02s0025g04610 PE=4 SV=1	CAP0122
281	CL5124.Contig5_All	162 1673 PREDICTED: serine/threonine-protein kinase STN8, chloroplastic [Vitis vinifera]	67741	MASLLSPTATAFHQDPKPIRFPLSRDSKHISQGFIWSLTNPCKKNLIKSNAFLNDISDNLLNNSLHLNQSLFQYPALQQLQRVTGELPEVQKWGLLVFAGITWIYLTARPGVLIGAIDAYILAPLQVGLDTLSGKRSLKRTDFLVGDRLGEGSFGIVYSGVIVPKNVSVDESFRRKGSRRALQIDERFKEKVILKKVKIGVQGAVECGDFEEWFNYRLSRAAPETCAEFLGSFIADKTNTQFTKGEKWLVWKYEGDLDLGDYMKDRSFPLNLESVMFGRVLQGLESIKRNALIIKQIMRQIITSLKKIHGTGIVHRDVKPSNLVVTKKGQIKLIDFGAATDLRIGKNYVPNRGLLDPDYCPPELYVMPEETPNPPPEPIAAFLSPILWQLNSPDLFDMY…	34|-	2.2|-	1|-	1|-	1|-	1|-	1|-	---	-	1	-	-	-	---	-	-	-	-	-	---	-	1	-	-	-	---	-	-	-	-	-	CL5124.Contig5_All	85.93	0	gi|297735528|emb|CBI18022.3|	unnamed protein product [Vitis vinifera]	77.37	0	sp|Q9LZV4|STN8_ARATH	Serine/threonine-protein kinase STN8, chloroplastic OS=Arabidopsis thaliana GN=STN8 PE=2 SV=1	87.5	5e-08	F6GXV9	F6GXV9_VITVI Putative uncharacterized protein OS=Vitis vinifera GN=VIT_08s0058g01470 PE=4 SV=1	DRA0332
282	CL5263.Contig7_All	262 2910 minus strand starch branching enzyme II [Ipomoea batatas]	113449	MVYTLPGVRLPTVPSLYKLGSNGWSSRVDRRNAHLSFFLKNKYNSRKIFSGKSYESGSQSSMATASDKVLVPGTENDGSSSPTEELDVPEIVSDNSQESGDVESLEMKHGIKIEDEEHLVEQHSSSEAIRGEDSTSLPLLDGDVEAKAEGTSDLTYETISHESSRVIPPPGIGQRIYEIDPLLSNYREHLDYRYDQYKKLREAIDKYEGGLEIFSRGYEKLGFNRSETGITYREWAPGAKWATLIGDFNNWNPNADVMTRNEFGVWEIFLPNNADGSPAIPHGSRVKIRMDTPSGIKDSIPAWIKFSVQAPGEIPYNGIYYDPPEEEKYVFKHPRPKKPKSLRIYESHVGMSSTEPVINTYANFRDEVLPRIKRLGYNAVQIMAIQEHSYYASFGYHVT…	210|304	4.2|5.9	-|-	10|12	8|9	3|4	1|1	0.925	0.695	7	9	-	*	1.008	0.702	5	8	-	-	1.069	1.024	7	9	-	-	0.848	0.584	5	8	-	*	CL5263.Contig7_All	92.25	4e-67	gi|32187555|gb|AAP72200.1|	starch branching enzyme IIb [Zea mays]	78.79	0	sp|Q08047|GLGB_MAIZE	1,4-alpha-glucan-branching enzyme 2, chloroplastic/amyloplastic OS=Zea mays GN=SBE1 PE=1 SV=1	89.37	0	Q3HR43	Q3HR43_METSA Starch branching enzyme 2 (Fragment) OS=Metroxylon sagu GN=SBE2 PE=2 SV=1	YEL011w
283	CL2582.Contig10_All	95 1282 s-adenosylmethionine synthetase, putative [Ricinus communis] >gi|223548531|gb|EEF50022.1| s-adenosylmethionine synthetase, putative [Ricinus communis]	53025	KVEEMDTFLFTSESVNEGHPDKLCDQISDAVLDACLEQDPDSKVACETCTKTNMVMVFGEITTKANIDYEKIVRDTCRNIGFTSDDVGLDADKCKVLVNIEQQSPDIAQGVHGHLTKRPEEIGAGDQGHMFGYATDETPEYMPLSHVLATKLGARLTEVRKDGTCPWLRPDGKTQVTVEYYNENGARVPIRVHTVLISTQHDETVTNDEIARDLKEHVIKPVIPEKYLDEKTIFHLNPSGRFVIGGPHGDAGLTGRKIIIDTYGGWGAHGGGAFSGKDPTKVDRSGAYIVRQAAKSIVANGLARRCIVQVSYAIGVPEPLSVFVDTYGTGKIPDKEILNIVKENFDFRPGMISINLDLKRGNNGRFLKTAAYGHFGRDDPDFTWEVVKPLKWEKPQ	-|116	-|15.9	-|1	-|5	-|1	-|4	-|1	-	---	-	-	-	-	-	---	-	-	-	-	-	---	-	-	-	-	-	---	-	-	-	-	CL2582.Contig10_All	96.43	0	gi|448872651|gb|AGE46016.1|	s-adenosylmethionine synthetase [Senecio scandens]	96.17	0	sp|A9P822|METK1_POPTR	S-adenosylmethionine synthase 1 OS=Populus trichocarpa GN=METK1 PE=2 SV=1	96.25	1e-139	A9PFU3	A9PFU3_POPTR Putative uncharacterized protein OS=Populus trichocarpa PE=2 SV=1	SPBC14F5.05c
284	CL687.Contig3_All	326 4324 minus strand PREDICTED: paired amphipathic helix protein Sin3-like 2-like [Vitis vinifera]	181119	GGGGGSSNGGGTGVTGSGTGVATTSTQKLTTNDALSYLKQVKDMFQDQREKYDRFLDVMKDFKAQRIDTAGVIARVKELFKGHPNLILGFNTFLPKGYEITLTDEEEAPPKRTVEFEEAISFVNKIKKRFQNDDHVYKSFLDILNMYRKEHKGITEVYQEVAALFDDHPDLLDEFTRFLPDTSATASAPHASFGRHSFHRYDERSSALPTMRQSHIDKQRPRRDRVTDPNGERDLSVERPDMDDDKTVTKLHKEQKKHNERENRDRRNRDQDDRDPDTENNGDISMHRLSDKKKSARKVEDFGGNSNLASYDDKDALKSMYSHEFTFCEKVKERLRSADDYQAFLKCLHIYSTEIITRKELQSLVADLLGKYPDLMEGFNEFLERCERIDGFLAGVMGK…	-|14	-|0.4	-|2	-|1	-|1	-|1	-|1	-	---	-	-	-	-	-	---	-	-	-	-	-	---	-	-	-	-	-	---	-	-	-	-	CL687.Contig3_All	73.75	3e-27	gi|297811637|ref|XP_002873702.1|	hypothetical protein ARALYDRAFT_350640 [Arabidopsis lyrata subsp. lyrata] >gi|297319539|gb|EFH49961.1| hypothetical protein ARALYDRAFT_350640 [Arabidopsis lyrata subsp. lyrata]	64.86	5e-22	sp|Q60520|SIN3A_MOUSE	Paired amphipathic helix protein Sin3a OS=Mus musculus GN=Sin3a PE=1 SV=3	76.25	1e-59	F6I5C7	F6I5C7_VITVI Putative uncharacterized protein OS=Vitis vinifera GN=VIT_15s0024g01450 PE=4 SV=1	SPBC12C2.10c
285	Unigene20325_All	30 899 PREDICTED: putative oxidoreductase GLYR1 isoform 1 [Vitis vinifera] >gi|147861759|emb|CAN78910.1| hypothetical protein VITISV_032948 [Vitis vinifera] >gi|297736660|emb|CBI25677.3| unnamed protein product [Vitis vinifera]	37999	EIGFLGLGIMGKAMSMNLLRHGFKLTVWNRTLSRCDELVEHGATIGETPAAVIKKCKHTIAMLSDPAAALSVVFDEDGVLEQICSGKGYIDMSTVDAETSSKISEAITSKGGYFLEAPVSGSKKPAEDGQLVILSAGEKALYEAALPAFDVLGKKSFFLGQVGNGAKMKLVVNMIMGSMMNAFSEGLVLADKSGLNPQTLLDVLDLGAIANPMFKLKGPSMIQGSYSPAFPLKHQQKDMRLALALGDENEVPMPVAAAANEAFKKARSMGLGDLDFSAVHETVASGKGSS	165|265	13.8|24.5	-|-	5|8	5|8	2|4	2|4	0.396	0.466	3	8	-	*	0.867	1.204	2	6	-	-	1.078	1.407	3	8	-	*	0.796	0.699	2	6	-	-	Unigene20325_All	88.89	3e-30	gi|297736077|emb|CBI24115.3|	unnamed protein product [Vitis vinifera]	83.39	4e-130	sp|Q9LSV0|GLYR1_ARATH	Glyoxylate/succinic semialdehyde reductase 1 OS=Arabidopsis thaliana GN=GLYR1 PE=1 SV=1	87.57	1e-84	G7JPT3	G7JPT3_MEDTR 6-phosphogluconate dehydrogenase, decarboxylating OS=Medicago truncatula GN=MTR_4g090220 PE=4 SV=1	aq_038
286	CL5646.Contig2_All	174 650 minus strand eukaryotic translation initiation factor 5A [Arachis hypogaea] >CL5646.Contig4_All 174 650 eukaryotic translation initiation factor 5A [Arachis hypogaea]	22501	MSDEEHHFESKADAGASKTYPQQAGTIRKNGYIVIKGRPCKVVEVSTSKTGKHGHAKCHFVGIDIFTSKKLEDIVPSSHNCDVPHVNRTDYQLIDISEDGFVSLLTENGNTKDDLRLPTDDNLLSQIKDGFSEGKDLVVSVMSAMGEEQICALKDIGPK	79|59	7.5|7.5	-|-	5|2	5|2	1|1	1|1	0.574	0.486	3	2	*	-	0.453	---	2	1	-	-	1.161	0.784	3	2	-	-	0.253	---	2	1	-	-	CL5646.Contig2_All	97.48	1e-87	gi|462420573|gb|EMJ24836.1|	hypothetical protein PRUPE_ppa012654mg [Prunus persica]	96.23	1e-86	sp|P24922|IF5A2_NICPL	Eukaryotic translation initiation factor 5A-2 OS=Nicotiana plumbaginifolia GN=EIF-5A2 PE=2 SV=1	96.86	1e-86	H6VUT4	H6VUT4_9FABA Eukaryotic translation initiation factor OS=Ammopiptanthus mongolicus PE=2 SV=1	YJR047c
287	CL2674.Contig1_All	138 1226 minus strand PREDICTED: altered inheritance of mitochondria protein 32 [Vitis vinifera]	48967	RFFSHLTSQSSSCSTMAGESESFSTTAEENAKYGFERGEMYQSNLAGTVDPYERHLFLCYKSHESWPSRVEDSETDPLPKLLASALKARKNDISRKTRLTICEGGDDVKLSDGDVLIFPEMIIYRGLKDSDVDSFVEDVLVNGNPWLSGVQEELTGSYVFVCAHNNRDRRCGVCGPVLIEKFKEEIESKDLKNQVFVTACSHVGGHKYAGNVIIFSADSDGKIAGNWYGYITPSDVLELLDKQIGKGEVIDRIWRGQMGANVKEAEKVEELKLANGTNANNNEKQSQEIGTEEKMESVGSCCQGANGFSCCRDENVEKKPVKKELGGLSCWMGKWEQRDVLTTVAVVGAVATVAVAYGLYRRA	32|-	4.4|-	-|-	1|-	1|-	1|-	1|-	---	-	1	-	-	-	---	-	-	-	-	-	---	-	-	-	-	-	---	-	1	-	-	-	CL2674.Contig1_All	66.8	7e-90	gi|449446704|ref|XP_004141111.1|	PREDICTED: altered inheritance of mitochondria protein 32-like [Cucumis sativus] >gi|449489582|ref|XP_004158355.1| PREDICTED: altered inheritance of mitochondria protein 32-like [Cucumis sativus]	38.98	2e-14	sp|C5DDQ4|AIM32_LACTC	Altered inheritance of mitochondria protein 32 OS=Lachancea thermotolerans (strain ATCC 56472 / CBS 6340 / NRRL Y-8284) GN=AIM32 PE=3 SV=1	66.67	1e-10	Q41494	Q41494_SOLTU Sucrase (Fragment) OS=Solanum tuberosum PE=4 SV=1	sll1203
288	CL9954.Contig1_All	473 1285 minus strand short chain alcohol dehydrogenase, putative [Ricinus communis] >gi|223536947|gb|EEF38585.1| short chain alcohol dehydrogenase, putative [Ricinus communis] >CL9954.Contig2_All 568 1380 minus strand short chain alcohol de	33233	VSMASTFLRRLEGKVAVITGAASGIGESTARLFSKHGAKVLIADVQDDLAENVCKDLGSSSTTFVHCDVTKESDVENAVNTAVARYGKLDIMFNNAGIAGIAGVAKPNILDSEKSEFEQIIRVNLVGAFLGTKHAARVMIPNRSGSIISTASVCSTIGGAASHAYTSSKHGVVGLTRNTAVELGNHGIRVNCVSPYLVPTPMAKDFFKLDDDGCSRPAYSILKGAVLGAEDVAEAALYLASDESKYVNGHNLLVDGGFTIVNSGLCMYPES	129|135	12.2|12.2	1|1	2|3	2|3	2|2	2|2	0.006	0.544	2	2	-	-	---	1.084	1	2	-	-	9.005	1.36	2	2	-	-	---	0.79	1	2	-	-	CL9954.Contig1_All	79.59	7e-57	gi|462403394|gb|EMJ08951.1|	hypothetical protein PRUPE_ppa027184mg [Prunus persica]	56.34	9e-67	sp|Q7FAE1|MOMAS_ORYSJ	Momilactone A synthase OS=Oryza sativa subsp. japonica GN=Os04g0179200 PE=2 SV=1	77.57	2e-113	B9SCZ0	B9SCZ0_RICCO Short chain alcohol dehydrogenase, putative OS=Ricinus communis GN=RCOM_1282440 PE=3 SV=1	lin1921
289	CL11419.Contig2_All	247 1707 minus strand plastid enolase [Helianthus annuus]	62604	MALTPSQLSKPILFTKPTSQTPLFSLPTTQRIKSRPFTVRSSVAVAPSSAVASKASAKVKNVKARQIVDSRGNPTVEVDLITEDDSLYRSAVPSGASTGIYEALELRDGDKSVFGGKGVLNAVKNINEFLGPKLIGVDVRNQTDVDAVMLEIDGTANKSKLGANAILGVSLSVCRAGAGAKGVPLYKHIQELSSTKELVMPVPAFNVINGGSHAGNNLAMQEFMILPVGASSFSEALRMGSEVYHILKGIIKAKYGQDACNVGDEGGFAPNVQDNREGLVLLIDAIEKAGYTGQIKIGMDVAASEFFTKEGKYDLNFKKQPNDGAHVLTAESLGDLYKEFVRDFPIVSIEDPFDQDDWSSWSSLQSSVGIQLVGDDLLVTNPKRIAEAIQKKACNALLL…	327|295	14.4|15.4	1|1	10|7	10|7	5|5	5|5	1.042	0.924	9	6	-	-	1.042	0.779	6	5	-	-	0.999	1.562	7	7	-	-	1.127	1.148	6	6	-	-	CL11419.Contig2_All	91.96	0	gi|462405694|gb|EMJ11158.1|	hypothetical protein PRUPE_ppa004863mg [Prunus persica]	91.25	0	sp|Q9C9C4|ENO1_ARATH	Enolase 1, chloroplastic OS=Arabidopsis thaliana GN=ENO1 PE=1 SV=1	92.63	1e-176	I1KD55	I1KD55_SOYBN Uncharacterized protein OS=Glycine max PE=4 SV=1	YGR254w
290	Unigene18798_All	465 959 glutathion peroxidase [Plantago major]	24540	SNQPQSIHDFTVKDAKGNDVNLDIYKGKVLLIVNVASQCGLTNSNYTELTQLYEKYKDQGLEILAFPCNQFGSQEPGTNEEIQEFVCTRFKAEYPIFDKVEVNGSNTAPIYKFLKSVKGSLFGDSIKWNFSKFLVDKEGQVVDRYAPTTSPLSIEKDIKKLLEKA	186|97	17.6|17.6	-|-	14|5	7|1	3|3	1|1	0.707	---	5	1	*	-	0.733	---	5	1	-	-	1.016	---	5	1	-	-	0.415	---	5	1	*	-	Unigene18798_All	89.7	4e-84	gi|82581134|emb|CAJ43709.1|	glutathion peroxidase [Plantago major]	83.64	2e-78	sp|Q06652|GPX4_CITSI	Probable phospholipid hydroperoxide glutathione peroxidase OS=Citrus sinensis GN=CSA PE=1 SV=1	89.7	4e-83	Q2YHN3	Q2YHN3_PLAMJ Glutathione peroxidase OS=Plantago major GN=gpx1 PE=2 SV=1	NMB1621
291	CL874.Contig15_All	74 994 minus strand PREDICTED: uncharacterized protein LOC100258584 [Vitis vinifera]	39231	MPRYEDRYGSTTRLYVGHLSSRTRSRDLEHIFSRYGRVRDVDMKRDYAFVEFSDPRDADDARYNLDGRDVDGRRIIVEFAKGVPRGPGGVREYVGRGPAPGSGRCFNCGIDGHWARDCKAGDWKNKCYRCGERGHIERNCQNSPKKLSGRGRSYSRSPVRSRSPRRGRSRSRSFSRSRSYSRSRSPARRGRDAEYKERRSRSPHGESPEPKRGPSPAKTRKLSPTPDRDGPRERSPSPVRGRMETEQDGYSDSPKETSRSPVSPAVRRYDESPYAANGRNRSPSPRDDRSPVDDDDPVRSPRGSESP	28|-	2.3|-	-|-	1|-	1|-	1|-	1|-	---	-	1	-	-	-	---	-	1	-	-	-	---	-	1	-	-	-	---	-	1	-	-	-	CL874.Contig15_All	91.3	5e-21	gi|222424795|dbj|BAH20350.1|	AT2G37340 [Arabidopsis thaliana]	81.25	5e-63	sp|Q9FYB7|RSZ32_ARATH	Serine/arginine-rich splicing factor RS2Z32 OS=Arabidopsis thaliana GN=RS2Z32 PE=1 SV=1	91.3	5e-20	B9DHY3	B9DHY3_ARATH AT2G37340 protein (Fragment) OS=Arabidopsis thaliana GN=AT2G37340 PE=2 SV=1	SPAC16.02c
292	Unigene9448_All	76 801 minus strand PREDICTED: uncharacterized protein C167.05-like isoform 4 [Vitis vinifera]	29935	NPTTEMQHPSPDSDLPPLAAIKVRSSSPRFPPPTTPLSTETPTANAQRRIGIAVDLSDESAFAVKWSVHHYLRPGDAVILVHVRPTSVLYGADWGSVDLSIVDTENEESQRKLEDDFDAFTTTKATDLAQPLVEAQIPFKIHIVKDHDMKERLCLEVERLGLSAVIMGSRGFGATKRGSDGRLGSVSDYCVRHCVCPVVVVRYPDEKDNAGGSGEPVVSVASAAEDEEEPEYHDASDDRKDS	92|210	14.5|14.5	-|-	4|6	4|6	2|2	2|2	0.577	0.584	2	5	-	*	0.788	0.851	2	4	-	-	1.095	1.267	2	5	-	-	0.486	0.616	2	4	-	*	Unigene9448_All	92.5	3e-13	gi|296081252|emb|CBI17996.3|	unnamed protein product [Vitis vinifera]	-	-	-	-	90	9e-12	Q93WN3	Q93WN3_ARATH At1g11360/T23J18_35 OS=Arabidopsis thaliana PE=4 SV=1	-
293	CL3174.Contig1_All	118 1491 PREDICTED: uncharacterized protein LOC100252855 [Vitis vinifera]	61698	MNFFKSILLDDPDPPKREAPNESDPNSPLKPPRDDSNSNDVADGGDPADGWSFGGLIKTLASRSESVIETCRRDLKEFGSGLKKETEVFRETASRAVKDLPASLEASASAAHGALDGVLKTTVEIISKESLGFASDGEPETPETNRSLNSGRYSWFEAQWSAIQSDLNTFCEEPEDVEEYRKWKLGFELEENRDEIDSLIGENGTLEGVYKRVVPSAVDPETFWCRYFYRVDKLKQQESVRANLVKRAILVDEEEELSWEVDEEEEDGNGNERASSLNVKGGDGVGDNVASGGNLNPVEKQEGLNSGSRNEKEGRNVNVDDGEKSNAVESSKKSSVDVSLGEKELKSEVVAEVKSDEKVKSEESVKAKHDEKVGVEEKGESGKETDASVASSHQSKVEE…	48|-	4.4|-	1|-	1|-	1|-	1|-	1|-	---	-	1	-	-	-	---	-	1	-	-	-	---	-	1	-	-	-	---	-	1	-	-	-	CL3174.Contig1_All	63.36	8e-37	gi|46092520|dbj|BAD14380.1|	hypothetical protein [Solanum melongena]	37.11	2e-11	sp|Q80Y55|BSDC1_MOUSE	BSD domain-containing protein 1 OS=Mus musculus GN=Bsdc1 PE=2 SV=1	63.36	9e-36	Q76H04	Q76H04_SOLME Putative uncharacterized protein 3C08 (Fragment) OS=Solanum melongena GN=3C08 PE=2 SV=1	-
294	Unigene15359_All	171 788 papain-like cysteine proteinase isoform I [Ipomoea batatas]	26030	MASRVALLFLSSLLIATSFRYSFADDDVAAGVIENDDLLIRQVVDHGEDDVVDENSLLNADRHFDIFKKKFGKAYATQEEHDHRFSVFKANLRRARRHQKLDPSAVHGVTQFSDLTPREFRRHFLGVNRRLRLPSDAHKAPVLPTNDLPTDFDWRDHGAVTPVKNQGSCGSCWSFSTTGALEGANFLATGNLVSLSEQQLVDCDHE	95|86	7.8|7.8	-|-	3|2	3|2	1|1	1|1	---	---	1	1	-	-	---	---	-	1	-	-	0.896	---	2	1	-	-	---	---	1	1	-	-	Unigene15359_All	81.88	2e-69	gi|146215998|gb|ABQ10201.1|	cysteine protease Cp3 [Actinidia deliciosa]	74.19	2e-09	sp|P32954|CYSP1_CARCN	Cysteine proteinase 1 (Fragment) OS=Carica candamarcensis PE=1 SV=1	81.88	2e-68	A5HIJ3	A5HIJ3_ACTDE Cysteine protease Cp3 OS=Actinidia deliciosa PE=2 SV=1	AF1946_2
295	Unigene9437_All	434 1615 minus strand fructokinase 3 [Solanum lycopersicum] >gi|38604456|gb|AAR24912.1| fructokinase 3 [Solanum lycopersicum]	50221	MALHCAALSFSCVSLHPQASWPSHRFWGPSSFLRKCSVKASGFSSPSPASFPRLRLQGKAIESGNGPLDTDESSLVVCFGEMLIDFVPTTSGLSLAEAPAFKKAPGGAPANVAVGIARLGGASAFIGKVGEDEFGYMLADILKENNVNNEGMRFDPGARTALAFVTLRKDGEREFMFYRNPSADMLLQEAELDLELIKKAKIFHYGSISLITEPCKSAHIAAAKAAKDAGVILSYDPNLRLPLWPSAESAREGILSIWDTADIIKISEEEICFLTKGEDPYDDNVVRKLYHENLKLLLVTEGPEGCRYYTKKFSGRVKGLKVEPVDTTGAGDAFVAGILSQLASDTSLLQDEDRLRDALRFANACGALTVTERGAIPALPTRETVLNALLKSVA	228|169	18.8|15.0	-|-	13|7	13|7	6|5	6|5	1.497	1.588	11	3	-	-	1.421	0.9	7	4	*	-	0.805	0.711	10	3	-	-	1.562	1.281	9	4	-	-	Unigene9437_All	91.53	1e-42	gi|255583411|ref|XP_002532465.1|	fructokinase, putative [Ricinus communis] >gi|223527823|gb|EEF29921.1| fructokinase, putative [Ricinus communis]	69.58	3e-107	sp|O82616|SCRK5_ARATH	Putative fructokinase-5 OS=Arabidopsis thaliana GN=At4g10260 PE=2 SV=1	91.53	1e-41	B9T2J6	B9T2J6_RICCO Fructokinase, putative OS=Ricinus communis GN=RCOM_0284770 PE=4 SV=1	BH1857
296	CL6492.Contig4_All	146 1183 Chaperone protein dnaJ [Medicago truncatula] >gi|355504505|gb|AES85708.1| Chaperone protein dnaJ [Medicago truncatula]	48568	MGVDYYKILQVDRSAKDDDLKKAYRKLAMKWHPDKNPNNKKEAEAKFKQISEAYDVLSDPQKRAVYDQFGEEGLKGQVPPPGAGGFYGGRDGGGSTTFRFNPRSADDIFSEFFGFSSPFGGMGDMGSGSRAGLSGFPRNMFGDDILASLRNAAASGEGGSGNVPRKAAAIERMLPCSLEDLYKGTTKKMKISRDVTDASGRPTTMEEILTIEIKPGWKKGTKITFPEKGNEQRGVIPSDLVFIIDEKPHSVFKRDGNDLIATQKISLVEALTGYTAQVTTLDGRNLTIPINNIVSPTYEEVVKAEGMPIPKEPGKKGNLRIKFNIKFPSRLTSEQKTGIKRLLTSS	59|-	3.5|-	1|-	2|-	2|-	1|-	1|-	---	-	1	-	-	-	---	-	-	-	-	-	---	-	1	-	-	-	---	-	-	-	-	-	CL6492.Contig4_All	98.72	2e-29	gi|296083160|emb|CBI22796.3|	unnamed protein product [Vitis vinifera]	70	6e-16	sp|Q9HJ83|DNAJ_THEAC	Chaperone protein DnaJ OS=Thermoplasma acidophilum (strain ATCC 25905 / DSM 1728 / JCM 9062 / NBRC 15155 / AMRC-C165) GN=dnaJ PE=3 SV=1	91.3	3e-67	I1J434	I1J434_SOYBN Uncharacterized protein (Fragment) OS=Glycine max PE=4 SV=1	YNL064c
297	CL8266.Contig1_All	171 1028 minus strand copper ion binding protein, putative [Ricinus communis] >gi|223532337|gb|EEF34136.1| copper ion binding protein, putative [Ricinus communis]	32168	LLISSMADHQRCVLLFIVFFSCFTYSSYGYQFVVGGRDGWVVKPSEDYNHWAERMRFQVNDTLLFKYKNGSDSVLVVNRDDYANCNTGNPLQKLDGGNSVFKFDRSGPFYFISGIKANCDQGQKLIIVVLAVRNHSTPPPNAPTPAAAPPKGSSPSPSPTGVTPAPASSPLSPSPSGGAPAPASSHLSPSPSGGAPAPANAPSSPSPAAEAPGPAIHGLGPSPAATYPAPPSSTTPGSPNSSTPGSGTPADVNAPGGSPPRSLAAASCTPSIVLVWTVSLVLSVGL	28|34	3.8|3.8	-|-	2|1	2|1	1|1	1|1	---	---	-	1	-	-	---	---	-	1	-	-	---	---	-	1	-	-	---	---	-	1	-	-	CL8266.Contig1_All	75.22	2e-45	gi|470120884|ref|XP_004296517.1|	PREDICTED: early nodulin-like protein 2-like [Fragaria vesca subsp. vesca]	53.97	5e-31	sp|Q5JNJ5|ENL1_ORYSJ	Early nodulin-like protein 1 OS=Oryza sativa subsp. japonica GN=ENODL1 PE=1 SV=1	70.89	4e-28	I1M366	I1M366_SOYBN Uncharacterized protein OS=Glycine max GN=Gma.48361 PE=4 SV=1	-
298	CL6584.Contig1_All	84 773 minus strand PREDICTED: 40S ribosomal protein S3-3 [Vitis vinifera] >gi|297738588|emb|CBI27833.3| unnamed protein product [Vitis vinifera]	32076	MATQMSKKRKFVADGVFFAELNEVLTRELAEDGYSGVEVRVTPMRTEIIIRATRTQNVLGEKGRRIRELTSVVQKRFKFPENSVELYAEKVNNRGLCAIAQAESLRYKLLGGLAVRRACYGVLRFVMESGAKGCEVIVSGKLRAQRAKSMKFKDGYMISSGQPVKEYIDSAVRHVLLRQGVLGIKVKIMLDWDPKGKQGPTTPLPDLVTIHPPKEEEFIRPTVLPTEVEV	371|97	5.7|9.1	3|2	11|5	11|1	1|2	1|1	1.038	---	9	-	-	-	1.015	---	5	-	-	-	1.269	---	9	-	-	-	0.984	---	5	-	-	-	CL6584.Contig1_All	98.21	1e-23	gi|224154183|ref|XP_002337443.1|	predicted protein [Populus trichocarpa] >gi|222839282|gb|EEE77619.1| predicted protein [Populus trichocarpa]	92.24	1e-115	sp|Q9M339|RS32_ARATH	40S ribosomal protein S3-2 OS=Arabidopsis thaliana GN=RPS3B PE=1 SV=1	96.38	5e-118	Q2VCJ9	Q2VCJ9_SOLTU Putative uncharacterized protein OS=Solanum tuberosum PE=2 SV=1	SPBC16G5.14c
299	CL226.Contig12_All	84 884 minus strand chlorophyll A/B binding protein, putative [Ricinus communis] >gi|223528666|gb|EEF30681.1| chlorophyll A/B binding protein, putative [Ricinus communis]	33442	MATSAIQQSAFGGQTALKPQNELIRKVGNLGATGGRFTMRRTVKSVPQSIWYGPDRPKYLGPFSEQTPSYLTGEFPGDYGWDTAGLSADPETFAKNRELEVIHCRWAMLGALGCVFPEILAKNGVKFGEAVWFKAGAQIFSEGGLDYLGNPNLIHAQSILAIWATQVVLMGFVEGYRVGGGPLGEGLDKIYPGGAFDPLGLADDPEAFAELKVKEIKNGRLAMFSMFGFFVQAIVTGKGPLENLADHLADPVNNNAWAYATNFVPGK	-|854	-|21.3	-|3	-|30	-|3	-|4	-|1	-	0.183	-	3	-	*	-	1.56	-	3	-	-	-	1.034	-	3	-	-	-	0.285	-	3	-	*	CL226.Contig12_All	94.87	8e-130	gi|115806|sp|P14279.1|CB25_SOLLC	RecName: Full=Chlorophyll a-b binding protein 5, chloroplastic; AltName: Full=LHCII type I CAB-5; Short=LHCP; Flags: Precursor >gi|170392|gb|AAA34142.1| chlorophyll a/b-binding protein precursor, partial [Solanum lycopersicum]	94.87	3e-130	sp|P14279|CB25_SOLLC	Chlorophyll a-b binding protein 5, chloroplastic (Fragment) OS=Solanum lycopersicum GN=CAB5 PE=2 SV=1	94.38	7e-144	B9T0C1	B9T0C1_RICCO Chlorophyll A/B binding protein, putative OS=Ricinus communis GN=RCOM_0483250 PE=4 SV=1	-
300	CL8239.Contig1_All	45 533 minus strand unnamed protein product [Vitis vinifera]	25177	PPSLRPLNPUSRSRRSLHSAIMGKTRGMGAGRKLKSHRRRQRWADKAYKKSHLGNEWKKPFAGSSHAKGIVLEKIGIEAKQPNSAIRKCARVQLIKNGKKIAAFVPNDGCLNFIEENDEVLIAGFGRKGHAVGDIPGVRFKVVKVSGVSLLALFKEKKEKPRS	61|86	6.7|6.7	1|1	1|2	1|2	1|1	1|1	---	0.974	1	2	-	-	---	0.995	1	2	-	-	---	1.246	1	2	-	-	---	1.188	1	2	-	*	CL8239.Contig1_All	100	5e-19	gi|414871019|tpg|DAA49576.1|	TPA: hypothetical protein ZEAMMB73_421092, partial [Zea mays]	97.18	2e-75	sp|P46297|RS23_FRAAN	40S ribosomal protein S23 OS=Fragaria ananassa GN=RPS23 PE=2 SV=1	98.59	9e-75	B3TLT7	B3TLT7_ELAGV 40S ribosomal protein S23 OS=Elaeis guineensis var. tenera PE=2 SV=1	YPR132w
301	CL10115.Contig1_All	93 827 PREDICTED: clathrin light chain 2-like [Vitis vinifera]	34532	SSFADSFDQFGGDSPAAGETNSFDDGYLGPDSFSNFDSTAVDSPPPIYVSGGEFPSDPAYFSSETNSNGPILPPPAEMEPEEGYALREWRRQNAIRLEEKEKREKEMLSQIIVEADEYKVEFHRKRQVTCETNRATNREKEKVFVASQEKFHAEADKDYWKSIAELIPKEVPAIQKRKGKKDQEQKPSIVVVQGPKPGKPTDLARMRQILLKLKHNTPPHLKPSPPPAPDAKPDASAAAKAPAVA	46|72	3.3|9.0	-|-	4|4	4|4	1|2	1|2	0.589	0.646	4	3	*	*	---	0.251	1	3	-	-	1.089	1.062	4	3	-	-	---	0.149	1	3	-	-	CL10115.Contig1_All	85.71	4e-07	gi|149392391|gb|ABR26010.1|	unknown [Oryza sativa Indica Group]	66.67	7e-48	sp|Q9SKU1|CLC1_ARATH	Clathrin light chain 1 OS=Arabidopsis thaliana GN=At2g20760 PE=2 SV=1	85.71	4e-06	A6N190	A6N190_ORYSI Putative uncharacterized protein (Fragment) OS=Oryza sativa subsp. indica PE=2 SV=1	-
302	CL9452.Contig1_All	97 498 minus strand PREDICTED: glycine-rich RNA-binding protein 2, mitochondrial [Vitis vinifera] >gi|147833478|emb|CAN75185.1| hypothetical protein VITISV_001912 [Vitis vinifera] >gi|298205231|emb|CBI17290.3| unnamed protein product [Vitis vini	14893	MACFNRVGTMLRQSISASSGLNGQSSMLNAIRCMSTKLFVGGLSYGTDDQSLRDAFSSFGDVVDARVITDRDSGRSRGFGFVNFSSDDSASSALSAMDGQQLNGRNIRVSYAQERAPRSSFNNAGGFGGANDGY	1303|808	21.6|21.6	-|-	31|21	31|21	2|2	2|2	1.525	1.695	27	18	*	*	1.045	0.943	21	17	-	-	0.752	0.645	27	18	*	*	1.094	1.05	21	18	-	-	CL9452.Contig1_All	79.17	5e-36	gi|225433489|ref|XP_002264895.1|	PREDICTED: glycine-rich RNA-binding protein 2, mitochondrial [Vitis vinifera] >gi|147833478|emb|CAN75185.1| hypothetical protein VITISV_001912 [Vitis vinifera] >gi|298205231|emb|CBI17290.3| unnamed protein product [Vitis vinifera]	62.5	5e-12	sp|Q62176|RBM38_MOUSE	RNA-binding protein 38 OS=Mus musculus GN=Rbm38 PE=1 SV=2	79.17	7e-35	A5C101	A5C101_VITVI Putative uncharacterized protein OS=Vitis vinifera GN=VIT_05s0029g00440 PE=4 SV=1	TP0356
303	CL387.Contig2_All	403 1980 minus strand PREDICTED: NAD(H) kinase 1 [Vitis vinifera]	68062	MTPSNSTSANGNASVSPAENGFIDSFSVLNSEKSVEELIQQPLLQGIDDHLIEFSEALRTVAKALRRVTEGKASAQAEAAEWKRKYELERARNLQLEQKVLSLGGHCSELNVERAGNLEDRTVLSHENGDQCEFCSGKDDISAHEVLRDGESDSDSSAISNKMMRKASFKLSWYCKGEKCNRHKHDIVSFEKGNITTAERSSKQISLKWESPPQTVLILTKPNSHSVRILCFEMVRWLKEQKKLNIFVEPRVKAELLTESLYYSFVQTWLDDKDFLLLHTKVDLVVTLGGDGTVLWAASMFKGPVPPIVPFSLGSLGFMTPFNSEHYCEYLNSVLLGPISITLRHRLQCHIIRDAAKSEYENEGPMLVLNEVTIDRGISSFLTNLECYCDNSFVTCVQG…	16|-	1.9|-	1|-	1|-	1|-	1|-	1|-	---	-	-	-	-	-	---	-	-	-	-	-	---	-	-	-	-	-	---	-	-	-	-	-	CL387.Contig2_All	90.36	7e-132	gi|396582393|gb|AFN88238.1|	NADH kinase, partial [Vigna luteola]	72.64	0	sp|Q56YN3|NADK1_ARATH	NAD(H) kinase 1 OS=Arabidopsis thaliana GN=NADK1 PE=1 SV=2	88.99	1e-116	C6T779	C6T779_SOYBN Putative uncharacterized protein OS=Glycine max PE=2 SV=1	YJR049c
304	CL1080.Contig1_All	241 990 minus strand PREDICTED: fasciclin-like arabinogalactan protein 7 isoform 2 [Vitis vinifera] >gi|225446997|ref|XP_002266986.1| PREDICTED: fasciclin-like arabinogalactan protein 7 isoform 3 [Vitis vinifera] >gi|225446999|ref|XP_002266893.1	29233	FMVCGTLLLLCFASANAQSSVAAPSSSPTPAPAPAPEYVNLTDLLSVAGPFHTFLNYLESTKVIETFQNQANSTDEGITIFVPKDEAFSSLKKQSLSNLTQDQLKSLCLFHALPHYYTLSDFKNLSQQNPIPTFAGGPFALNFTDNSGTIRLDSGWTKTKVISAVHAADPVAIYETDRVLLPEAIFGTDIPPTPAPAPAPEIAPAADTPADRGGSDSSSPTSSPSSSQRISNLGVLSHLMSAIVGGVILF	251|237	10.4|7.2	1|1	8|5	6|5	2|1	1|1	1.011	1.088	5	4	-	-	4.621	1.581	4	4	*	-	0.522	0.6	2	5	-	*	---	1.056	1	4	-	-	CL1080.Contig1_All	84.44	1e-37	gi|92429507|gb|ABD93500.2|	cell adhesion protein [Petunia axillaris subsp. parodii]	72.85	9e-61	sp|Q9SJ81|FLA7_ARATH	Fasciclin-like arabinogalactan protein 7 OS=Arabidopsis thaliana GN=FLA7 PE=1 SV=1	84.44	1e-36	Q1W7H0	Q1W7H0_PETPA Cell adhesion protein (Fragment) OS=Petunia parodii GN=At2g04780 PE=4 SV=2	-
305	CL860.Contig5_All	2 772 PREDICTED: protease 4-like [Vitis vinifera]	36526	LPQICENFEKAAYDSRVLGIYLHIDTLNCGWGKLEEIRRHMLDFKKSGKFIIGYVPACGVKEYYIGCACEELYAPPSAYVGLYGLLVQASFLGGVLEKVGIKAQVERIGKYKSVGDQLTCKSMSDENREMLTALLDNIYGNWLDKISLAKGKKKEDIENFINEGVYQVERMKEEGLITDIKYDDEVMSLLRKRLGIPSTKILPTVGYRKYCNVRRWTLGLNRGYEDQIAIIRASGSISRTQGRFKTPSSRIVAEQFI	33|29	3.5|3.5	-|-	2|1	2|1	1|1	1|1	---	---	1	-	-	-	---	---	1	-	-	-	---	---	1	-	-	-	---	---	1	-	-	-	CL860.Contig5_All	77.78	5e-92	gi|297734122|emb|CBI15369.3|	unnamed protein product [Vitis vinifera]	27.18	1e-12	sp|P73689|SPPA_SYNY3	Protease 4 OS=Synechocystis sp. (strain PCC 6803 / Kazusa) GN=sppA PE=3 SV=1	77.78	5e-91	D7SIQ8	D7SIQ8_VITVI Putative uncharacterized protein OS=Vitis vinifera GN=VIT_17s0000g04680 PE=4 SV=1	all4590
306	CL804.Contig27_All	218 2107 minus strand glucose-6-phosphate 1-dehydrogenase, putative [Ricinus communis] >gi|223530268|gb|EEF32168.1| glucose-6-phosphate 1-dehydrogenase, putative [Ricinus communis]	85112	MAKWLSTPCSHSSSTTFFSSFHNESLCCSRKLIALRSICHFSKWVPKIFARIQLRSHFELRSSNGYPLNAVSLQDEGSAANPQAEETHFSELGQGDSTLSITVVGASGDLAKKKIFPALFALYYEDWLPENFVVFGYSRTKMNDEELRNMISRTLTCRIDKRENCDEKMAEFLKRCFYHSGQYNSEEHFSELNCKLKAKEGGRQSNRLFYLSIPPNIFVDVVRCASTKASSTTGWTRVIVEKPFGRDSESSSELTRCLKQYLTEDQIFRIDHYLGKELVENLSVLRFSNLVFEPLWSRNYIRNVQLIFSEDFGTEGRGGYFDNYGIIRDIMQNHLLQILALFAMETPVSLDAEDIRNEKVLEFVCMSLKSLNUGLHYLKLSUESSYHHFVMYVVEIDEC…	38|-	2.9|-	1|-	2|-	1|-	2|-	1|-	---	-	-	-	-	-	---	-	-	-	-	-	---	-	-	-	-	-	---	-	-	-	-	-	CL804.Contig27_All	90.97	1e-78	gi|388514991|gb|AFK45557.1|	unknown [Lotus japonicus]	79.39	0	sp|Q43839|G6PDC_SOLTU	Glucose-6-phosphate 1-dehydrogenase, chloroplastic OS=Solanum tuberosum PE=1 SV=1	81.6	0	I1KUZ6	I1KUZ6_SOYBN Uncharacterized protein OS=Glycine max PE=4 SV=1	YNL241c
307	CL4105.Contig10_All	339 1562 minus strand PREDICTED: lysM domain-containing GPI-anchored protein 1 [Vitis vinifera]	46817	LFSLLGAFLPRATPKSTIEPCSNSDSCTSLVGYTLYTDLKVSELASIFSVDPISLLLTNAIDISYPDVENHILPSQLFLKIPITCSCVDGIRKSGAVSYKTRPSDTLSSISAAVYGGLVSADQIKDANPNAELSDPSVISVGTKLNIPLPCTCFNNSDNNLPAVYMSYVVRDVDTLAGIAATYVTTVSDLMNVNALGSAEIKEGDILAIPLSACASNFPKYASDYDLVVPNGSYAITASHCVQCSCGPGSRNLYCMPASLAVSCSSMQCRNSNLMLGNATIQQSAAGCNVTSCSYSGFVNGSIAAILSTSLQPRCPGLQQFPPLIAPPTLVPDSLFAPAPSPSESGGIPTTNPKTTVVPSSGTVLAFPPANGPSGSASVSSGAYSSMIQLTRFPITITL…	187|227	4.7|10.8	1|1	3|6	3|6	1|2	1|2	1.19	1.095	3	6	-	-	3.099	0.965	2	3	-	-	0.912	1.04	2	6	-	-	---	1.047	1	3	-	-	CL4105.Contig10_All	76.97	3e-158	gi|460409774|ref|XP_004250313.1|	PREDICTED: lysM domain-containing GPI-anchored protein 1-like [Solanum lycopersicum]	69.12	1e-142	sp|Q93ZH0|LYM1_ARATH	LysM domain-containing GPI-anchored protein 1 OS=Arabidopsis thaliana GN=LYM1 PE=1 SV=1	76.13	6e-145	B2ZAQ1	B2ZAQ1_9ROSI Peptidoglycan-binding LysM domain-containing related protein OS=Gossypioides kirkii PE=4 SV=1	-
308	CL9328.Contig2_All	1 738 unknown protein [Arabidopsis thaliana] >gi|110736843|dbj|BAF00379.1| hypothetical protein [Arabidopsis thaliana]	32415	FRSSSFSPPCQILLHCSTLGQPKHSSNMESQEDLTKNFSISDFKNFMAVPLSCPDSKPISRLHVFSDPHQETEPRKPTTNFSTSITKKKIRLALELFDFIHFPTLVQFWAPTITENQQEFLDTSDLPFGLSVLRKGLCFFRRHCLSHRYCVDGESCGPPGRVFRRRFPEFCPDVDCYSVEEFELKGFAVAAGVRGYLSLPVFEPDWQCCIGVLEILTVMDGSYSLTDVIGKVSNSLEEVELKSSDV	20|-	4.5|-	-|-	1|-	1|-	1|-	1|-	---	-	-	-	-	-	---	-	-	-	-	-	---	-	-	-	-	-	---	-	-	-	-	-	CL9328.Contig2_All	40.72	1e-13	gi|460398179|ref|XP_004244640.1|	PREDICTED: protein NLP6-like [Solanum lycopersicum]	39.31	4e-13	sp|Q8RWY4|NLP6_ARATH	Protein NLP6 OS=Arabidopsis thaliana GN=NLP6 PE=2 SV=2	40	1e-11	D7KS88	D7KS88_ARALL RWP-RK domain-containing protein OS=Arabidopsis lyrata subsp. lyrata GN=ARALYDRAFT_474894 PE=4 SV=1	-
309	CL1312.Contig3_All	317 2560 unnamed protein product [Vitis vinifera]	85226	QTRINQISQQLTLGALELEDNEGSLSTSEFQYGKTSDHQLSKEESEQLELERREIIGEILKLNPTYKAPVDYKPLLKEAKVPIPIKEYPGYNFIGLVFGLASDTQKRLEKETGAKIQVYGTKADTGGKVELTPTDGKEIENAYEDLYVHVSADTFEKIDAAVALIELLLTRVSVNPVSSSTTSTADYVDNVNTHPSQSMSNSIIAPALMNHGTAQPYAGSFPPSQGQFPQYPQAWFPAGPTLTPTYPQSGFVTPANSSAPLLSNTVQVSSSPFNPTNMPSLFGPRPVIAASFSPVLQNPSVVPSRPHALQLPYMQQAPPLGQTGGPRNTTVPILHSVTAQLSLTGPPYNVRPVISTSPQSASLAAFSDKPLPSAGESTRWLPSPVSTSASQGLTYIMPM…	33|-	1.1|-	1|-	1|-	1|-	1|-	1|-	---	-	-	-	-	-	---	-	-	-	-	-	---	-	-	-	-	-	---	-	-	-	-	-	CL1312.Contig3_All	63.41	3e-07	gi|147765506|emb|CAN64750.1|	hypothetical protein VITISV_009292 [Vitis vinifera]	40.37	6e-12	sp|Q64213|SF01_MOUSE	Splicing factor 1 OS=Mus musculus GN=Sf1 PE=1 SV=6	60.27	4e-17	B7F9L5	B7F9L5_ORYSJ cDNA, clone: J090025G05, full insert sequence OS=Oryza sativa subsp. japonica PE=2 SV=1	SPCC962.06c_1
310	CL465.Contig2_All	286 2235 minus strand poly(A)-binding protein [Nicotiana tabacum]	81758	MAQTQVQHQNAAAAAGPNGAGGAAAAGQFLSTSLYVGDLDFNVTDSQLYDLFNQVGQVVSVRVCRDLSTRRSLGYGYVNYSSPQDAARALEVLNFTPLNNKSIRVMYSHRDPSIRKSGTANIFIKNLDKTIDNKALHDTFSSFGNILSCKIATDPSGQSKGYGFVQFDTEESAQSAIDKLNGMLMNDKQVYVGHFLRKQERDTAFNKTQFNNVYVKNLAESTTDDDLKNIFGEYGTITSSVVMRDADGKSKCFGFVNFENADDAAKAVEALNGKTIDGKEWYVGKAQKKSEREQELKSRFEQTAKEAVDKFQGVNLYIKNLDDSIDDDKLKELFAEFGTITSCKVMRDPSGISRGSGFVAFSTPEEASRALSEMNGKMVISKPLYVALAQRKEERRARL…	332|951	15.1|16.2	-|-	14|22	8|18	7|7	4|5	0.858	0.748	4	10	-	-	0.475	0.945	2	6	-	-	1.272	1.236	4	7	-	-	0.529	0.672	2	7	-	-	CL465.Contig2_All	90.51	3e-129	gi|106879567|emb|CAJ38367.1|	polyA-binding protein [Plantago major]	73.63	0	sp|P42731|PABP2_ARATH	Polyadenylate-binding protein 2 OS=Arabidopsis thaliana GN=PAB2 PE=1 SV=1	87.64	0	A5B5N0	A5B5N0_VITVI Putative uncharacterized protein OS=Vitis vinifera GN=VIT_18s0001g10170 PE=4 SV=1	SPAC1610.03c
311	CL5032.Contig1_All	87 1034 phi-1 [Nicotiana tabacum]	40633	MASTFLIVKFLAMLSLLNVVCFASRLMPNALVEDPQNQMLKYHKGALLHGRISVNLIWYGKFKPSQRAIVSDFITSLSPSARAQSQPSVAVWWKTTEKYYHLANSKNPSSLSLFLGKQVLDESYSLGKSLPEKQIVQLASKGDQKNAINVVLTASDVAVDGFCVNRCGTHGSKNALVKGKNYKFAYIWVGNSETQCPGYCAWPFHQPIYGPQSPPLVAPNNDLGLDGMVMSLSGLLAGTATNPFGNGFYQGPSAAPLEAASACPGVYAKGAYPGYAGDLLVDPTSGASYNAHGANGRKYLLPAIFDPSTSKCSTLV	-|74	-|4.7	-|-	-|3	-|3	-|1	-|1	-	---	-	1	-	-	-	---	-	-	-	-	-	---	-	1	-	-	-	---	-	-	-	-	CL5032.Contig1_All	82.91	1e-93	gi|68299211|emb|CAJ13706.1|	Phi-1 protein [Capsicum chinense]	-	-	-	-	82.91	1e-92	Q4LAX0	Q4LAX0_CAPCH Phi-1 protein (Fragment) OS=Capsicum chinense GN=phi-1 PE=2 SV=1	-
312	CL10968.Contig1_All	123 938 PREDICTED: thylakoid lumenal 16.5 kDa protein, chloroplastic isoform 1 [Vitis vinifera] >gi|297738978|emb|CBI28223.3| unnamed protein product [Vitis vinifera]	37068	MATLFLSNAKVFLPCLPSTSSCSSASTSIVHTQQIVCKAGNEPSPVVISRRSISLNLTATTTFLFSTLAGYKGCFDKANAAILEAEDDEQLLEKVKKDRKKRLERQGVINSSTKETAYLQDLVYKLSKIGQAIEKNDLSAASSVLGSSKDSEWVQKVNSAFSKVFHFUKLTSFRLHECVGSHYMRDVLASLCQILMLCRTIFUNFUSTIFWQLSSSEEEKTEVDAFNSSLASLISSVSRNDIEASKVAFVASASAFEKWTTLSGLVEQLKGL	400|349	20.6|25.0	1|1	14|11	14|11	4|5	4|5	1.677	0.962	12	9	*	-	1.029	1.051	8	8	-	-	0.979	1.286	11	9	-	*	1.822	1.768	7	8	*	*	CL10968.Contig1_All	67.47	5e-26	gi|326533442|dbj|BAK05252.1|	predicted protein [Hordeum vulgare subsp. vulgare]	56.41	3e-36	sp|O22773|TL16_ARATH	Thylakoid lumenal 16.5 kDa protein, chloroplastic OS=Arabidopsis thaliana GN=At4g02530 PE=1 SV=3	67.47	5e-25	F2ED30	F2ED30_HORVD Predicted protein OS=Hordeum vulgare var. distichum PE=2 SV=1	-
313	CL2706.Contig1_All	264 1460 minus strand glyceraldehyde-3-phosphate dehydrogenase A [Scoparia dulcis]	51447	MASAALSSLQVGCSKGFSEFAGLRSSSSALPFAKRANDDFVSVIAFQTSVVGGDKNKRGVVEAKLKVAINGFGRIGRNFLRCWHGRKDSPLDVIAINDTGGVKQASHLLKYDSTLGIFDADVKPVGTDGISVDGKVIQVVSNRNPVNLPWKDLGVDLVIEGTGVFVDRDGAGKHIQAGAKKVLITAPGKGDIPTYVVGVNADDYNPDEPIISNASCTTNCLAPFVKVLDQKFGIIKGTMTTTHSYTGDQRLLDASHRDLRRARAAALNIVPTSTGAAKAVALVLPQLKGKLNGIALRVPTPNVSVVDLVVQVEKKTFAEEVNAAFREAADKELNGILSVCDEPLVSVDFRCSDVSSTVDSSLTMVMGDDMVKVIAWYDNEWGYSQRVVDLAHIVANNWK	-|1680	-|39.1	-|-	-|67	-|1	-|13	-|1	-	---	-	1	-	-	-	---	-	1	-	-	-	---	-	1	-	-	-	---	-	1	-	-	CL2706.Contig1_All	96.88	5e-75	gi|159138203|gb|ABW89104.1|	glyceraldehyde-3-phosphate dehydrogenase [Helianthus annuus]	93.13	3e-95	sp|P09672|G3PA_SINAL	Glyceraldehyde-3-phosphate dehydrogenase A, chloroplastic (Fragment) OS=Sinapis alba GN=GAPA PE=2 SV=1	96.81	4e-147	Q8VWP4	Q8VWP4_CAPAN Glyceraldehyde-3-phosphate dehydrogenase (Fragment) OS=Capsicum annuum GN=gapA1 PE=2 SV=1	sll1342
314	CL8912.Contig1_All	160 2574 PREDICTED: uncharacterized protein LOC100261914 [Vitis vinifera] >gi|297734852|emb|CBI17086.3| unnamed protein product [Vitis vinifera]	109191	TAEEEAQAEPTNPDEEDSESEPAPLESSSDSDSDADSDDEPISYTRPDGTTRQIQLDDSDSENTPEVNIPRFTKLLNSKRLRKEQEEEEEDIEYHEDLFDFPRDPENWREEDLKELWADAPLEMTKPGWDPNWVDEEEVEIISEEIKAGRDPPIAPFYVPYRKNYPVIPDNHYDISNPKSVIEELDRIEEFLIWVSYIFPDGSSYEGTVWDDLAHGKGVYVAEQGLVRYEGEWLQNNMEGHGVVEVDIPTMEPIPGSKLEAKMRAEGKIISRDFMSPEDREWLEMDIEDSLRLADGDYEIPFYENDEWVRQFGRKPEKGRYRYAGQWKHGRMHGCGVYEVNERTTYGRFYFGELLEDPTGCDAEVSGLHAGIAEVAAAKARMFINKPDGMVREDRGPYS…	21|24	1.0|1.4	1|-	1|1	1|1	1|1	1|1	---	---	-	-	-	-	---	---	-	-	-	-	---	---	-	-	-	-	---	---	-	-	-	-	CL8912.Contig1_All	82.33	0	gi|225436347|ref|XP_002270926.1|	PREDICTED: uncharacterized protein LOC100261914 [Vitis vinifera] >gi|297734852|emb|CBI17086.3| unnamed protein product [Vitis vinifera]	-	-	-	-	82.33	0	D7SN57	D7SN57_VITVI Putative uncharacterized protein OS=Vitis vinifera GN=VIT_06s0061g01260 PE=4 SV=1	-
315	Unigene23700_All	428 3013 stachyose synthase [Stachys affinis]	116720	MAPPNDPVNSIFSALISSKKDNFFELLDGKLSVRNVPLLTEIPNNVTFKSFSSVCQSSEAPLPLFKRAQSLSFKGGFLGFSQHESADRLTNSLGKFTGRDFVSIFRFKTWWSTQWVGKSGSDIQMETQWVMLDVPEIKSYAVIIPIVEGKFRSALHPGTDGHMLICAESGSTHVKASSFDAVAYVHVSDNPYTLMKEAYTAVRVHLNTFKLIEEKSAPPLVNKFGWCTWDAFYLTVEPAGIWHGVKEFADGGLSPRFLIIDDGWQSINIDGQDPNKDAKNLVLGGTQMTARLHRLDECEKFRKYKGGSMLGPNRPPFNPKKPKMLISKAIEIEVAEKSRDKAAQSGVTDLSQYEVQIEKLKKELDEMFGGEEEEKGSSKGCASCSCKSENFGMKAFTRD…	-|42	-|2.6	-|-	-|2	-|2	-|2	-|2	-	---	-	1	-	-	-	---	-	1	-	-	-	---	-	1	-	-	-	---	-	1	-	-	Unigene23700_All	86.08	0	gi|21038869|emb|CAD31704.1|	putative stachyose synthase [Alonsoa meridionalis]	66.09	0	sp|Q93XK2|STSYN_PEA	Stachyose synthase OS=Pisum sativum GN=STS1 PE=1 SV=1	86.08	0	Q8L5R0	Q8L5R0_ALOME Putative stachyose synthase OS=Alonsoa meridionalis GN=sts1 PE=2 SV=1	-
316	CL2226.Contig1_All	98 967 PREDICTED: clathrin light chain 1-like [Vitis vinifera]	41864	MASFDAYSMDGDVSARPFDYDGNTAYDESYSAFSSADTPPYSAAAYTPEYVESEQVPVDHVNSSDPFGFGSNPTQSFGSSGSVPISNGNGNSPYNIGEDSEGIFSSDGPILPPPSEMQEEGFALREWRRLNAIRLEEKENREKEMRSQIIEEAEEYKQAFYEKRKLNVETNKTSNREKEKLYLASQEKFHKEADKQYWKAIAELIPNEVPNIEKRGKKKDQDKKPSITVIQGPKPGKPTDLSRMRGILVKLKHNPPPHMLPPPPPPPAPAKDGKDGKDGKKHKKCKGRST	192|300	9.0|9.0	2|2	7|11	7|11	2|2	2|2	0.498	0.479	6	10	*	*	0.858	0.623	5	9	-	*	1.152	0.937	6	10	-	-	0.485	0.262	5	9	-	*	CL2226.Contig1_All	80	6e-39	gi|255640762|gb|ACU20665.1|	unknown [Glycine max]	76.19	6e-53	sp|Q9SKU1|CLC1_ARATH	Clathrin light chain 1 OS=Arabidopsis thaliana GN=At2g20760 PE=2 SV=1	80	7e-38	C6TFR3	C6TFR3_SOYBN Putative uncharacterized protein OS=Glycine max PE=2 SV=1	-
317	Unigene5629_All	150 1049 conserved hypothetical protein [Ricinus communis] >gi|223551300|gb|EEF52786.1| conserved hypothetical protein [Ricinus communis]	40794	MATITNFLTKQPPYLTPITKIMPLYPQFPSSHLPISYKPKQNFFNLETNRRPTFLAKAAAAPGVEKAKSDERVQQVHSIQEFDDALRAAKNRLVVVEYAASHSVNSSKIYPFMVDLSRNCSDVDFLLVMGDESEETRKLCAREKIEQVPHFSFYKSMEKIHEEEGIGPDQLIGDVLYYGDNHSGVVQLHCREDVEKLIEEHKVDNKLIVLDVGLKHCGPCVKVYPTVLKLSRSMADTVVFARMNGDENDSCMQFLRDMNVVEVPTFLFIRDGEICGRYVGSGKGELIGEILRYQGVRVTY	260|426	14.0|19.7	-|-	13|20	13|20	4|6	4|6	0.575	0.659	7	12	-	-	0.603	0.662	6	8	-	-	3.309	1.582	7	11	-	*	1.325	0.732	6	9	-	-	Unigene5629_All	88.89	1e-60	gi|462406532|gb|EMJ11996.1|	hypothetical protein PRUPE_ppa018016mg, partial [Prunus persica]	79.22	8e-107	sp|Q84NN4|CDSP_ORYSJ	Thioredoxin-like protein CDSP32, chloroplastic OS=Oryza sativa subsp. japonica GN=CDSP32 PE=2 SV=1	84.19	1e-104	A9PJH9	A9PJH9_9ROSI Putative uncharacterized protein OS=Populus trichocarpa x Populus deltoides PE=2 SV=1	BMEI2022
318	CL13815.Contig1_All	310 549 minus strand unnamed protein product [Vitis vinifera]	10659	APVSASFAPLDLTEDNIKQVLADARIELAQLFDTSVNITGKAELAELDGPYVKISLSGRFWHKRSTVLARLGNYLKQRIP	31|31	15.0|15.0	1|1	1|1	1|1	1|1	1|1	---	---	1	1	-	-	---	---	1	1	-	-	---	---	1	1	-	-	---	---	1	1	-	-	CL13815.Contig1_All	84.72	2e-30	gi|462399969|gb|EMJ05637.1|	hypothetical protein PRUPE_ppa026994mg, partial [Prunus persica]	-	-	-	-	81.25	8e-32	D7TDC3	D7TDC3_VITVI Putative uncharacterized protein OS=Vitis vinifera GN=VIT_12s0057g01550 PE=4 SV=1	-
319	CL827.Contig3_All	490 3630 minus strand PREDICTED: histone-lysine N-methyltransferase ATX4-like [Vitis vinifera]	149604	MIGKRPRKIGMPKLKRCSAAKEEITRGNDVEESCTAAVKSKKMKKTTNQCFTVPVVQLEGHNIDFSNYCPTTGVSFCNGKANSIAQRVAKNKPPLLKSSRGRKQVLPMKFSDSVLHSWKKEKSECCDDLKSSLADNDEYVQDVLRKKKLKREESSASYDDIYLVKKPRIERPLGFRLKNIILEPYSSPRSSVTSINEGISCVSPVVESGRKMNGYAGLRKPVREKVVEKKADFYEPGDFVMGDIVWAKCGKNFPAWPAIVIDPLWQAPEAVLRACVPGTLCVMFYGYSRSGQRDYAWIKAGMVFPFHEYMDRFQGQTKLYGSKPSDFHGAIEEAILAENGYVDSAMEAGQETLPVTNYGDAEEATGSNQESECTIQQEIFDKRKDTRACSSCGLIFPCR…	16|-	0.7|-	2|-	1|-	1|-	1|-	1|-	---	-	-	-	-	-	---	-	-	-	-	-	---	-	-	-	-	-	---	-	-	-	-	-	CL827.Contig3_All	83.33	4e-19	gi|296084161|emb|CBI24549.3|	unnamed protein product [Vitis vinifera]	60.07	0	sp|Q9SUE7|ATX4_ARATH	Histone-lysine N-methyltransferase ATX4 OS=Arabidopsis thaliana GN=ATX4 PE=2 SV=3	77.36	7e-67	G7L442	G7L442_MEDTR Histone-lysine N-methyltransferase ATX3 OS=Medicago truncatula GN=MTR_7g117370 PE=4 SV=1	SPCC306.04c
320	CL14304.Contig3_All	100 1419 minus strand PREDICTED: KH domain-containing protein At4g18375-like [Glycine max]	52373	EQDLGNLQEMENVPEDSHPPEESKGENDAGVVEEKKWPGWPGENVFRLLVPVQRVGGIIGRKGEYIKKICEETKARIKILDGPPGTTERTVMVSAKEEPDLQIPPALDGLLKIHKHIVDAGSDPTNARSGGTVCTRLLVAASQAGSLIGKQGATIKSIQDDSHCTIRVLGEENLPVFALPDDSVVEIQGEPAGLHKAVELIATHLRKFLVDRSVVGVFEMQMQMPNAQVNQNMPPSQSWGLPPSAFPMNPGGHGYGSNLSIMAPPPRQYDNYYPAADVPSLDKLPRSGPLTYGRDVSRSAHTTNVQPQQAVITKVAQNMQIPLSYADAVIGVNGANISYIRRASGATIAIQETRGVFGEMTVEINGSASQVQAAQQLIQNSIADAVSSAQNTAGGPPSQ…	-|35	-|3.6	-|2	-|1	-|1	-|1	-|1	-	---	-	1	-	-	-	---	-	1	-	-	-	---	-	1	-	-	-	---	-	1	-	-	CL14304.Contig3_All	74.6	4e-23	gi|413933626|gb|AFW68177.1|	hypothetical protein ZEAMMB73_133887 [Zea mays]	30.36	4e-07	sp|Q99PF5|FUBP2_RAT	Far upstream element-binding protein 2 OS=Rattus norvegicus GN=Khsrp PE=1 SV=1	73.85	2e-17	D5A8F6	D5A8F6_PICSI Putative uncharacterized protein OS=Picea sitchensis PE=4 SV=1	-
321	CL3536.Contig1_All	289 843 minus strand hypoxanthine-guanine phosphoribosyltransferase-like [Glycine max] >CL3536.Contig5_All 260 814 minus strand hypoxanthine-guanine phosphoribosyltransferase-like [Glycine max]	24903	LNDHVEKILLTEQQISGRVSELGSQITRDFKDRTDAPVIVGVATGAFLFLADLVRKIHLPVTVDFIRVESYGSGTVSNGQPTISFGLKVDVRGKHVILVEDIVDTGSTLSCLIDYMKTKGASSISVCTLLDKAARRKVHFKPVGEGKYYFGFECPDYFVVGYGLDLAEMYRNLPYVGVLKPEMYK	-|24	-|5.9	-|1	-|1	-|1	-|1	-|1	-	---	-	-	-	-	-	---	-	-	-	-	-	---	-	-	-	-	-	---	-	-	-	-	CL3536.Contig1_All	72.97	8e-76	gi|351734398|ref|NP_001236467.1|	hypoxanthine-guanine phosphoribosyltransferase-like [Glycine max]	45.3	5e-42	sp|Q839B2|HPRT_ENTFA	Hypoxanthine-guanine phosphoribosyltransferase OS=Enterococcus faecalis (strain ATCC 700802 / V583) GN=hpt PE=3 SV=1	72.97	7e-75	A1YUN0	A1YUN0_SOYBN Putative hypoxanthine-guanine phosphoribosyltransferase OS=Glycine max GN=Gma.52282 PE=2 SV=1	BH0084
322	CL4814.Contig1_All	143 1012 PHB2 [Nicotiana benthamiana]	37772	MNFKNVNVPKMPGGGAASALIKFGVVAGLGVYGIANSLYNVEGGHRAIVFNRVVGIKDKVYPEGTHIMIPWFERPVIYDVRARPHLVESTSGSRDLQMVKIGLRVLTRPVPDQLPTIYRTLGENYNERVLPSIIHETLKAVVAQYNASQLITQRENVSREIRKILTERAAYFNIALDDVSITSLTFGKEFTAAIEAKQVAAQEAERAKFVVDKAEQDKRSAIIRAQGEAKSAQLIGQAIANNPAFITLRRIEASKEISHTVAASNNKVYLNSDELLLNLQDLNSEQSGKK	118|136	11.7|11.7	-|-	4|3	4|3	2|2	2|2	1.024	1.388	3	3	-	-	0.605	---	3	1	-	-	1.154	0.88	4	3	-	-	1.245	---	3	1	-	-	CL4814.Contig1_All	94.48	1e-74	gi|63080996|gb|AAY30257.1|	prohibitin-like protein [Petunia x hybrida]	82.58	3e-126	sp|O49460|PHB1_ARATH	Prohibitin-1, mitochondrial OS=Arabidopsis thaliana GN=PHB1 PE=1 SV=1	91.08	9e-143	Q45Q23	Q45Q23_NICBE PHB2 OS=Nicotiana benthamiana PE=2 SV=1	SPCC1322.16
323	CL12173.Contig1_All	196 486 uncharacterized protein LOC100305708 [Glycine max]	13639	SAAGKMSGQEEDKKPADSSAHINLKVKGQDGNEVFFRIKRSTQLKKLMNAYCDRQSVDFNSIAFLFDGRRLRGEQTPDELEMEDGDEIDAMLHQTGG	100|94	10.3|10.3	2|2	4|3	4|3	1|1	1|1	0.613	0.625	4	3	*	-	1.561	0.656	3	3	-	-	0.573	0.625	3	3	-	*	0.701	0.252	2	3	-	-	CL12173.Contig1_All	100	2e-06	gi|51970338|dbj|BAD43861.1|	ubiquitin-like protein SMT3-like [Arabidopsis thaliana]	95.45	9e-43	sp|Q9FLP6|SUMO2_ARATH	Small ubiquitin-related modifier 2 OS=Arabidopsis thaliana GN=SUMO2 PE=1 SV=1	97.22	2e-34	Q5TIQ0	Q5TIQ0_CANSA Ubiquitin-like protein SMT3 (Fragment) OS=Cannabis sativa GN=smt3 PE=2 SV=1	SPBC365.06
324	Unigene5834_All	132 938 predicted protein [Populus trichocarpa] >gi|222853674|gb|EEE91221.1| predicted protein [Populus trichocarpa]	33278	MARVASTSSAVGLPRFRPSSFQSHHQPPRLANLSFHFQKKNLRHHRIICRNNPNLVDSAAAEEKPLAEPESEINGTAANAATTETTTSTGAGFPEYPDKNFNRRIAVVSTLAAVGLFLSARLDFGGVSLKDLSAAALPYEEALSNGKPTVVEFYADWCEVCRELAPDVYKVEQQYKDRVNFVMLNVDNTKWEQELDEFGVEGIPHFAFLDRDGNEEGNVVGRLPRQYLLENIDALARGEATVPHARVVGQYSSAESRKVRQVVDPRSHG	34|32	4.5|4.5	-|-	1|1	1|1	1|1	1|1	---	---	-	1	-	-	---	---	-	-	-	-	---	---	-	1	-	-	---	---	-	-	-	-	Unigene5834_All	88.7	2e-89	gi|356496838|ref|XP_003517272.1|	PREDICTED: thioredoxin-like protein HCF164, chloroplastic-like [Glycine max]	84.09	4e-86	sp|Q7Y0D4|TR164_ORYSJ	Thioredoxin-like protein HCF164, chloroplastic OS=Oryza sativa subsp. japonica GN=Os03g0767500 PE=2 SV=1	88.72	4e-66	I1LHJ4	I1LHJ4_SOYBN Uncharacterized protein OS=Glycine max GN=Gma.58629 PE=4 SV=1	sll1980
325	CL944.Contig10_All	191 1120 PREDICTED: cytochrome c1-1, heme protein, mitochondrial-like [Vitis vinifera] >gi|296090253|emb|CBI40072.3| unnamed protein product [Vitis vinifera]	38659	MFGGRAIHRLLRERLQSQNTVSPVLSSLISKKEQEGVGSATMKSWRVLALFGAGVSGLLSFATIASCDEAEHGLGVPNYPWPHKGILSSYDHASIRRGHQVYQQVCASCHSMSLISYRDLVGVAYTEEETKAMAAEIEVVDGPNDEGEMFTRPGKLSDRFPQPYANEQAARFANGGAYPPDLSLITKARHNGQNYVFALLTGYRDPPAGVSIREGLHYNPYFPGGAIAMPKMLNDGAVEYEDGTPATEAQMGKDVVTFLSWAAEPEMEERKLMGFKWIFVLSLALLQAGYYRRLRWSVLKSRKLVLDVVN	-|51	-|8.1	-|3	-|2	-|2	-|2	-|2	-	1.269	-	2	-	-	-	1.647	-	2	-	-	-	0.549	-	2	-	-	-	1.129	-	2	-	-	CL944.Contig10_All	97.37	1e-61	gi|390986589|gb|AFM35814.1|	hypothetical protein, partial [Oryza eichingeri]	93.08	6e-144	sp|P29610|CY12_SOLTU	Cytochrome c1-2, heme protein, mitochondrial (Fragment) OS=Solanum tuberosum GN=CYCL PE=1 SV=1	93.47	6e-106	F2DK74	F2DK74_HORVD Predicted protein OS=Hordeum vulgare var. distichum PE=2 SV=1	YOR065w
326	CL873.Contig3_All	216 1658 PREDICTED: UDP-sulfoquinovose synthase, chloroplastic [Vitis vinifera]	62086	MAHVLSVSCSLNISSGSRSFSKPSNQFLSSASVSLPISASPFKRLAFQINNRSQKCRTIYVKAVSMSQEARVQPGSGSHQTSSEASVPKKVMVIGGDGYCGWATSLHLSNKNYEVAVVDSLVRRLFDHQLGLDSLTPIASIHNRIRRWKSLTGKDIQLYVGDICDFEFLSEAFKSFEPDAVVHFGEQRSAPYSMIDRSRAVFTQQNNVIGTLNVLFAIKEFREDCHLVKLGTMGEYGTPNIDIEEGYITITHNGRTDTLPYPKQASSFYHLSKVHDSHNIAFTCKAWGIRATDLNQGVVYGVRTDETAMHEELCNRLDYDGVFGTALNRFCVQAAVGHPLTVYGKGGQTRGYLDIRDTVQCVELAIANPAQRGEFRVFNQFTEQFSVNELAALVTKAGE…	109|154	8.3|8.3	-|-	5|5	5|5	3|3	3|3	0.982	1.001	3	4	-	-	1.861	0.766	2	3	-	-	1.021	0.962	3	5	-	-	1.801	0.749	2	3	-	-	CL873.Contig3_All	98.94	4e-50	gi|156712087|emb|CAM84363.1|	putative sulfolipid biosynthesis protein [Withania somnifera]	79.09	0	sp|Q84KI6|SQD1_SPIOL	UDP-sulfoquinovose synthase, chloroplastic OS=Spinacia oleracea GN=SQD1 PE=1 SV=1	90.59	0	I1HJY1	I1HJY1_BRADI Uncharacterized protein OS=Brachypodium distachyon GN=BRADI2G26870 PE=4 SV=1	slr1020
327	Unigene14853_All	2 1423 minus strand hypothetical protein VITISV_023381 [Vitis vinifera]	70240	ESEAKIEEKQIEPPVIEDVKDINADEKPKAEDSTEVVAPLPEPTEQKTEDKPVEFPPAEEQKKTEVVAPLAESTEEKIEDKPVEPPTVEEKKTEDAPILEGSDKGIPEVAKETVPEPETTRLLEATVADSESKSEAEPAEKQESKVESIEEPAERVDVPGSSSAEVVQEKVEKAEELPANEVEPTEVKNVTVSETKCKGEESSESTPVVEEKPLEQSEVTEQIEKEPAEPIEKVVVETPTDTAKDTKLPKEDKVAIEETIAIESSQVKSESLKTQVEKKDVECTTTDEVSEKTGEANEEEEPAKETVEVEALSEERIVEPGKIEEKTEIPEAKTEEKSVVAEELAPCEEKPIQDVTSSIPPPEIAEKAAEDEVTSRDINMVEDNGNKKDETVASAETPN…	-|462	-|15.6	-|-	-|15	-|1	-|6	-|1	-	---	-	1	-	-	-	---	-	1	-	-	-	---	-	1	-	-	-	---	-	1	-	-	Unigene14853_All	-	-	-	-	-	-	-	-	-	-	-	-	-
328	CL12337.Contig1_All	87 2540 minus strand Heat shock protein 90 [Nicotiana tabacum]	122381	MRKWTIPSVLFLLCLLFLLPDQGRKIQANAEVDSDTLVDPPKVEEKIGAVPNGLSTDSDVAKREAESMSRRTLRANAEKFEFQAEVSRLMDIIINSLYSNKDIFLRELISNASDALDKIRFLSLTDKEILGEGDNAKLEIQIKLDKEKKILSIRDRGIGMTKEDLIKNLGTIAKSGTSAFVEKMQTSGDLNLIGQFGVGFYSVYLVADYVEVISKHNDDKQHVWESKADGAFSISEDEWNEPLGRGTEIRLHLRDEAQEYLDEYKLKELVKKYSEFINFPIHLWASKEVDEEVPADEDESSDDEETSESKSSEEEDEEDAEKDEDEKKPKTKTVKKTTYEWELLNDVKAIWLRNPKEVTDEEYTKFYHSLAKDFGDEKPLAWSHFTAEGDVEFKALLFV…	306|290	11.0|9.5	-|-	15|12	4|1	7|7	2|1	1.325	---	3	1	-	-	0.743	---	3	1	-	-	1.168	---	4	1	-	-	1.385	---	3	1	-	-	CL12337.Contig1_All	93.36	2e-147	gi|365189292|dbj|BAL42333.1|	Heat shock protein 90 [Nicotiana tabacum]	92.03	0	sp|P35016|ENPL_CATRO	Endoplasmin homolog OS=Catharanthus roseus GN=HSP90 PE=2 SV=1	93.36	3e-146	G9MD87	G9MD87_TOBAC Heat shock protein 90 OS=Nicotiana tabacum GN=NtHsp90er-2 PE=2 SV=1	YPL240c
329	Unigene9343_All	118 312 bdn1 [Paraboea crassifolia]	9855	MADEVQYHHHESKSDQPCDPAAPKAEEYASVEATDRGPFDFVGKKEGEKKCEEEVVAAEFEEKVQ	19|25	12.3|12.3	-|-	1|1	1|1	1|1	1|1	---	---	-	-	-	-	---	---	-	-	-	-	---	---	-	-	-	-	---	---	-	-	-	-	Unigene9343_All	-	-	-	-	-	-	-	-	-	-	-	-	-
330	Unigene11525_All	226 1677 minus strand NADH dehydrogenase [Solanum tuberosum]	63258	MAPIRGILSLQRTALVRRSNENWGLAIRLFSTQSATSPTTPQPPPPPEKTHFGGLKDEDRIFTNVYGLHDPFLKGAMKRGDWYRTKDLVLKGADWIVNEMKKSGLRGRGGAGFPSGLKWSFMPKASDGRPSYLVVNADESEPGTCKDREIMRHDPHKLLEGCLIAGVGMRARAAYIYIRGEYVNERKNLEKARREAYEAGLLGKNACGSGYDFDVHIHFGAGAYICGEETALLESLEGKQGKPRLKPPFPANAGLYGCPTTVTNVETVAVSPTILRRGPEWFASFGRKNNSGTKLFCISGHVNKPCTVEEEMSIPLKELIERHCGGVRGGWDNLLAVIPGGSSVPLIPKHMCEDVLMDFDALKAVQSGLGTAAVIVMDKSTDVVDAIARLSYFYKHESC…	40|88	5.4|6.4	2|2	2|3	2|3	2|2	2|2	---	0.67	1	3	-	*	---	0.882	1	3	-	-	---	1.507	1	3	-	-	---	0.642	1	3	-	-	Unigene11525_All	96.21	0	gi|190895762|gb|ACE96394.1|	esterase/lipase/thioesterase [Populus tremula] >gi|190895772|gb|ACE96399.1| esterase/lipase/thioesterase [Populus tremula]	91.77	0	sp|Q9FNN5|NDUV1_ARATH	NADH dehydrogenase [ubiquinone] flavoprotein 1, mitochondrial OS=Arabidopsis thaliana GN=At5g08530 PE=2 SV=1	96.21	0	B3VID7	B3VID7_POPTN Esterase/lipase/thioesterase (Fragment) OS=Populus tremula PE=4 SV=1	mll1365
331	CL12556.Contig2_All	337 1734 minus strand ATP sulfurylase [Camellia sinensis]	61578	MAAMASLYLKTSTPLPHSFPKLPKTHFTPPLNLPLHPFPTSKSRPATRVSASLIDPDGGKLVELFVKESEKDSKLKQALSLPKVRLSKIDLQWVHVLSEGWASPLKGFMRESEFLQTLHFNSLRLENGSVVNMSVPIVLAIDDAQKNRVGSFTSVALVDEKDDLVAILSDIEIYKHNKEERIARTWGTTAPGLPYVEETISGAGNWLIGGDLEVISPIKYNDNLDRFRLSPAQLRDEFERRNADAVFAFQLRNPVHNGHALLMTDTRRRLLEMGYKNPVLLLHPLGGYTKADDVPLSWRMKQHEKVLEDGVLDPETTVVSIFPSPMHYAGPTEVQWHAKARINAGANFYIVGRDPAGMSHPIEKRDLYDADHGKKVLSMAPGLERLNILPFKVAAYDKT…	26|-	1.5|-	-|-	1|-	1|-	1|-	1|-	---	-	1	-	-	-	---	-	1	-	-	-	---	-	1	-	-	-	---	-	1	-	-	-	CL12556.Contig2_All	95.79	4e-106	gi|281426908|emb|CBI71382.1|	ATP sulfurylase 1 [Brassica oleracea var. italica]	78.21	0	sp|Q9LIK9|APS1_ARATH	ATP sulfurylase 1, chloroplastic OS=Arabidopsis thaliana GN=APS1 PE=1 SV=1	86.51	2e-148	A7YF66	A7YF66_MAIZE ATP sulfurylase (Fragment) OS=Zea mays PE=2 SV=2	BH3386
332	Unigene1237_All	92 1441 minus strand PREDICTED: aspartic proteinase nepenthesin-1-like [Vitis vinifera]	54859	LSIFTFLFFLLISTALPYSSAETPFHYLKLPLLHKNPHPPTPSEALSSDNHRLSTLFSALRKHPHPQLPVNSAASFGSGQYLVSLHLGTPPQRVLLIADTGSDLTWVSCSACRRHCSSRATSFFPRHSATFSPYHCFDSTCTLVPHPKKPVHCNHTRIHSTCRYEYSYSDGSITNGFFSHETTTFNTSAGKLLKFQHFSFGCGFWNSGPSVSGASFNGGNGVLGLGRGPISFSSQLGREFGHKFSYCLMDYSLSPPPTSYLLIGGGSANGAAGKAKLSYTPLLINRLSPTFYYIGIESVLINDVKLRISPSVWAIDKFGNGGTVLDSGTTLTFLAEPAYRRILAVFERLVKLPRSPEPTLGFDLCLNVSGLSRTSLPQLSFKLGGGSVFSPPPRNYFID…	22|23	2.2|2.2	-|-	1|1	1|1	1|1	1|1	---	---	-	-	-	-	---	---	-	-	-	-	---	---	-	-	-	-	---	---	-	-	-	-	Unigene1237_All	66.18	2e-138	gi|359473000|ref|XP_002278677.2|	PREDICTED: aspartic proteinase nepenthesin-1-like [Vitis vinifera]	33.25	3e-37	sp|Q766C3|NEP1_NEPGR	Aspartic proteinase nepenthesin-1 OS=Nepenthes gracilis GN=nep1 PE=1 SV=1	66.18	2e-137	F6HF17	F6HF17_VITVI Putative uncharacterized protein OS=Vitis vinifera GN=VIT_01s0011g02930 PE=4 SV=1	-
333	CL6924.Contig5_All	192 3956 minus strand PREDICTED: uncharacterized protein LOC100253761 [Vitis vinifera]	162178	MASFLPQFQSIKTSFDHVVLAVEDVSDLWPIVKKGFEERLPFKRAFLNNKTRNPVLVDELPVEFILTTDARLRSRFPQEQSLFWFREPYATIVLVTCEDLDEFKNILKPRLKLIVQNDEREWFIVFVSKAPAHNDQATKMAKKVYAKLEVDFSSKKRERCCKLDMHGPDVNFWEDLEAKIMECIRNTLDRRIQFYEEEIRKLSEQRFMPVWNFCNFFILKESLAFMFEIAHLHEDALREYDELELCYLETVNMVGKQRDFGGVEREDDQATLLDPGKKALTQIVQDDSFREFEFRQYLFSCQAKLLFKLNRPFEVASRGYSFIISFSKALALHESMLPFCMREVWVITACLALIDATASHYKDGLAAPDVEKEFYRVQGELYTLCRTKFMRLGYLIGFG…	18|-	0.8|-	-|-	1|-	1|-	1|-	1|-	---	-	-	-	-	-	---	-	-	-	-	-	---	-	-	-	-	-	---	-	-	-	-	-	CL6924.Contig5_All	82.41	2e-46	gi|225462870|ref|XP_002272739.1|	PREDICTED: uncharacterized protein LOC100246153 [Vitis vinifera] >gi|296087480|emb|CBI34069.3| unnamed protein product [Vitis vinifera]	30.71	2e-06	sp|Q556Z3|TPC10_DICDI	Trafficking protein particle complex subunit 10 OS=Dictyostelium discoideum GN=trapcc10-1 PE=3 SV=1	82.41	2e-45	D7TU95	D7TU95_VITVI Putative uncharacterized protein OS=Vitis vinifera GN=VIT_03s0017g01270 PE=4 SV=1	-
334	Unigene22956_All	78 755 PREDICTED: uncharacterized protein At2g39795, mitochondrial [Vitis vinifera]	33541	RLVRGLRGAVKNLVLQQQSKPINHFLKSSSRNYVSEMRKTAFEGNILRLIRNEIQYELDRSPPFEPIPEFDSFKVDERPGEQWIRLTRKFGENEEIKIEVTMFDGSLPVKKNDDTSEDVKLHITLIIDVFKGEDKDILEFVCSAWSDSIEIRNVFTRGHDRIKDQPYMGPKFKELDDELQDSLYDFLEARGIDDKLAEFLHLYMRNKDKNEYLRWMENVKSFIQKK	15|-	3.1|-	-|-	1|-	1|-	1|-	1|-	---	-	-	-	-	-	---	-	-	-	-	-	---	-	-	-	-	-	---	-	-	-	-	-	Unigene22956_All	65.28	2e-68	gi|297743612|emb|CBI36479.3|	unnamed protein product [Vitis vinifera]	46.55	3e-10	sp|P40513|MAM33_YEAST	Mitochondrial acidic protein MAM33 OS=Saccharomyces cerevisiae (strain ATCC 204508 / S288c) GN=MAM33 PE=1 SV=1	65.28	2e-67	D7TZG5	D7TZG5_VITVI Putative uncharacterized protein OS=Vitis vinifera GN=VIT_09s0002g09050 PE=4 SV=1	-
335	Unigene22853_All	500 919 minus strand predicted protein [Populus trichocarpa] >gi|222846932|gb|EEE84479.1| predicted protein [Populus trichocarpa]	19850	IARKLEALNPTKEPLKSNLLNGKWELIYTTSQSILQTQRPKFLRSRTNYQAINADTLRAQNMESWPFFNQVTADLTPLNAKKVAVKFDVFKIGGLIPVKAPGRAQGELEITYLDEELRVSRGDKGNLFILKMVDPSYRVP	51|59	16.4|16.4	-|-	2|2	2|2	2|2	2|2	1.187	---	2	1	-	-	1.942	---	2	1	-	-	---	---	1	1	-	-	---	---	1	1	-	-	Unigene22853_All	93.57	2e-65	gi|462420403|gb|EMJ24666.1|	hypothetical protein PRUPE_ppa011650mg [Prunus persica]	75	3e-54	sp|Q9LU85|PAP4_ARATH	Probable plastid-lipid-associated protein 4, chloroplastic OS=Arabidopsis thaliana GN=PAP4 PE=1 SV=1	93.57	3e-63	B9GEX8	B9GEX8_POPTR Predicted protein OS=Populus trichocarpa GN=POPTRDRAFT_1067428 PE=4 SV=1	-
336	CL13934.Contig1_All	183 1580 minus strand unnamed protein product [Vitis vinifera]	58875	SKTMAPSTSLSSQYSPNLLQLPLHSPQFRLILAGISLSRSKCDFSRKLLLLQQQRSWDPLRPRPIAAKEVGIKCFAEPAEKRDSAGEVVLDKDGDDGVPDDVTVEEVIGQEFSNGSAGSQRIPASGDSLSLGIREPVYEVVEVRSNGMVSTRKINRRHLLKSSGLRPRDVRSVDPSLWLTNSMPSLLVREYAILLNLGSLRAIAMQERVYIFNYNRKGGKAFIDTLLPRLNPKNMNVGPSMPFVLEVVEAALHSRIQRLERRLMDLEPRVQALLEVLPNRLTAGILEELRISKQTLVELGSRAGALKQMLLDILEDTHEIRRICIMGRNCTLMKNDEMECSVPLEKEIAEEEEEEIEMLLENYLQRCESCHGQAERLLDSAKEMEDSIAVNLSSRRLEV…	-|42	-|2.8	-|1	-|1	-|1	-|1	-|1	-	---	-	1	-	-	-	---	-	1	-	-	-	---	-	1	-	-	-	---	-	1	-	-	CL13934.Contig1_All	92.94	6e-30	gi|106879657|emb|CAJ42299.1|	putative magnesium transporter [Plantago major]	82.79	1e-143	sp|Q058N4|MRS2B_ARATH	Magnesium transporter MRS2-11, chloroplastic OS=Arabidopsis thaliana GN=MRS2-11 PE=1 SV=1	92.94	7e-29	Q1EML4	Q1EML4_PLAMJ Putative magnesium transporter (Fragment) OS=Plantago major GN=mgt1 PE=2 SV=1	-
337	CL1290.Contig5_All	794 1228 putative aldo/keto reductase 2 [Salvia miltiorrhiza]	19373	RELGIGIVPYSPLARGFFSEGPKLIQNLSEGDFRKSFPRFQAENLENNKQIYERVTEMATRKGCTPSQLALAWVHHKGDDVCPIPGTTKIENLSQNIGALSVKLTPEEMTELESYASADVVKGERHAFMSNTWMNSETPPLSSWK	100|-	22.8|-	-|-	4|-	1|-	2|-	1|-	---	-	-	-	-	-	---	-	-	-	-	-	---	-	1	-	-	-	---	-	1	-	-	-	CL1290.Contig5_All	80	5e-66	gi|151301848|gb|ABR92332.1|	putative aldo/keto reductase 2 [Salvia miltiorrhiza]	77.32	1e-42	sp|P40691|A115_TOBAC	Auxin-induced protein PCNT115 OS=Nicotiana tabacum PE=2 SV=1	80	7e-65	A6ZI63	A6ZI63_SALMI Putative aldo/keto reductase 2 OS=Salvia miltiorrhiza PE=2 SV=1	DR2261
338	CL3007.Contig1_All	69 398 minus strand RecName: Full=V-type proton ATPase subunit G 1; Short=V-ATPase subunit G 1; AltName: Full=Vacuolar proton pump subunit G 1 >gi|3717987|emb|CAA06756.1| G subunit of Vacuolar-type H+-ATPase [Nicotiana tabacum]	14972	MAANSSQNGIQLLLAAEQEAQHIVNAARTAKQARLKQAKEEAEREIAEFRAQMEADFQRKVAESSGDSGANVKRLEQETEEKIEHLKTEASRISPDVVSMLLRHVTTVKN	271|103	10.0|10.0	2|2	9|4	9|4	1|1	1|1	1.539	1.309	8	3	*	-	1.686	1.223	6	3	-	-	1.063	0.985	7	3	-	-	2.062	1.561	5	3	*	-	CL3007.Contig1_All	85.45	1e-35	gi|284433762|gb|ADB85087.1|	vacuolar ATP synthase subunit G1 [Jatropha curcas]	85.45	3e-38	sp|O82702|VATG1_TOBAC	V-type proton ATPase subunit G 1 OS=Nicotiana tabacum GN=VATG1 PE=3 SV=1	85.45	2e-34	D6BR50	D6BR50_9ROSI Vacuolar ATP synthase subunit G1 OS=Jatropha curcas PE=4 SV=1	-
339	Unigene4110_All	107 442 unknown [Lotus japonicus] >gi|388502206|gb|AFK39169.1| unknown [Lotus japonicus] >gi|388509866|gb|AFK42999.1| unknown [Lotus japonicus]	15158	MGVEKELLRAGTGPKPVAGQNVTVHCTGFGKNGDLAKKFWSTKDPGQKPFSFQIGQGKVIKGWDEGVLGMQVGEVARLRCSPDYAYGPGGFPAWGIQPNSVLDFEIEVLSVE	422|359	14.3|14.3	2|2	9|8	9|8	1|1	1|1	0.472	0.526	8	8	*	*	0.717	0.844	3	7	-	-	1.148	1.099	8	8	-	-	0.373	0.446	3	7	*	*	Unigene4110_All	88.39	5e-52	gi|352962784|gb|AEQ63297.1|	FK506-binding protein 12 [Fragaria x ananassa]	83.04	5e-52	sp|O04287|FKB12_VICFA	Peptidyl-prolyl cis-trans isomerase FKBP12 OS=Vicia faba GN=FKBP12 PE=1 SV=1	88.39	7e-51	G8HCT5	G8HCT5_FRAAN Peptidyl-prolyl cis-trans isomerase OS=Fragaria ananassa PE=4 SV=1	SPBC839.17c
340	Unigene1993_All	231 689 unnamed protein product [Vitis vinifera]	19737	FFLSPTHSHVGYLFSTGERKMLPLSLLKTAQGHPMLVELKNGETYNGHLVNCDTWMNIHLREVICTSKDGDRFWRMPECYIRGNTIKYLRVPDEVIDKVQEETKSRSDRKPPGVGRGRGRGREDGGARGVGGGRSRGGSGGRAGGNRGGGRGR	-|29	-|5.2	-|1	-|1	-|1	-|1	-|1	-	---	-	1	-	-	-	---	-	1	-	-	-	---	-	1	-	-	-	---	-	1	-	-	Unigene1993_All	100	7e-51	gi|255564128|ref|XP_002523061.1|	Small nuclear ribonucleoprotein SM D3, putative [Ricinus communis] >gi|223537623|gb|EEF39246.1| Small nuclear ribonucleoprotein SM D3, putative [Ricinus communis]	97.75	1e-45	sp|Q9LGE6|LSM4_ORYSJ	Probable U6 snRNA-associated Sm-like protein LSm4 OS=Oryza sativa subsp. japonica GN=Os01g0256900 PE=2 SV=1	100	8e-50	B9SAP2	B9SAP2_RICCO Small nuclear ribonucleoprotein SM D3, putative OS=Ricinus communis GN=RCOM_1177550 PE=4 SV=1	YER112w
341	Unigene36616_All	2 208 minus strand Hsp90 [Citrus sinensis]	9597	SLIINTFYSNKEIFLRELISNSSDALDKIRFESLTDKSKLDAQSELFIHIIPDKTNNTLSIIDSGIGMT	-|30	-|21.7	-|-	-|1	-|1	-|1	-|1	-	---	-	1	-	-	-	---	-	1	-	-	-	---	-	1	-	-	-	---	-	1	-	-	Unigene36616_All	98.55	1e-31	gi|381144432|gb|AFF58924.1|	Hsp90 [Citrus sinensis]	95.65	3e-31	sp|P51818|HS903_ARATH	Heat shock protein 90-3 OS=Arabidopsis thaliana GN=HSP90-3 PE=1 SV=2	98.55	1e-30	H9NHK0	H9NHK0_CITSI Hsp90 OS=Citrus sinensis GN=hsp90 PE=2 SV=1	SPAC926.04c
342	CL8671.Contig3_All	172 915 minus strand putative delta TIP [Nicotiana glauca]	26668	MPAIAFGRFDDSFSFASVKAYIAEFISTLLFVFAGVGSAIAYNKLTSDAALDPAGLVAVAVCHGFALFVAVAVGANISGGHVNPAVTFGLAVGGQITILTGLFYWIAQLLGAIVACFLLSVVTGGLAIPTHGVAAGVGAVEGVVMEIIITFALVYTVYATAADPKKGSLGTIAPIAIGFIVGANILAAGPFSGGSMNPARSFGPAVASGDYSGIWIYWVGPLVGGGLAGLVYSNVFMQHEHAPLVSEF	34|-	4.4|-	-|-	1|-	1|-	1|-	1|-	---	-	1	-	-	-	---	-	1	-	-	-	---	-	1	-	-	-	---	-	1	-	-	-	CL8671.Contig3_All	90.21	3e-61	gi|292653547|gb|ADE34291.1|	aquaporin TIP2;5, partial [Gossypium hirsutum]	83.81	5e-92	sp|Q41951|TIP21_ARATH	Aquaporin TIP2-1 OS=Arabidopsis thaliana GN=TIP2-1 PE=1 SV=2	90.21	3e-60	D9DBW8	D9DBW8_GOSHI Aquaporin TIP2;5 (Fragment) OS=Gossypium hirsutum GN=GhTIP2;5 PE=2 SV=1	SP1778
343	CL1972.Contig1_All	180 671 minus strand uncharacterized protein LOC100499951 [Glycine max]	23720	MAKDRRIGVAMDFSKSSKAALQWSIDNLADKGDIFHILHVKSHSLHESRNKIWSQSGSPLIPLVEFREPEVMKKYDVPIDIEVLDILDTAARQKEITVVTKLYWGDAREKLCEAVEDLKLDSLVMGSRGLTTIKRIILGSVSNYVVATATCPVTIIKDPDFHKK	23|-	5.5|-	2|-	1|-	1|-	1|-	1|-	---	-	-	-	-	-	---	-	-	-	-	-	---	-	-	-	-	-	---	-	-	-	-	-	CL1972.Contig1_All	79.41	2e-42	gi|449439954|ref|XP_004137750.1|	PREDICTED: uncharacterized protein C167.05-like isoform 1 [Cucumis sativus]	34.62	2e-06	sp|Q57951|Y531_METJA	Universal stress protein MJ0531 OS=Methanocaldococcus jannaschii (strain ATCC 43067 / DSM 2661 / JAL-1 / JCM 10045 / NBRC 100440) GN=MJ0531 PE=3 SV=1	76.42	2e-42	A9XP42	A9XP42_9MYRT NOD18 protein (Fragment) OS=Sonneratia ovata PE=4 SV=1	L1010
344	CL14088.Contig2_All	1540 1752 chloroplast-specific ribosomal protein [Solanum lycopersicum] >gi|51457950|gb|AAU03364.1| chloroplast-specific ribosomal protein [Solanum lycopersicum] >CL14088.Contig3_All 1319 1531 minus strand chloroplast-specific ribosomal prote	9890	QIVRTKYFDMPPLTVAEAIEQLENLDHDFYGFRNEETGEVNIVYKRKAGGYGLIIPKGNGETEKLEPLVVD	68|96	31.0|31.0	-|-	4|4	3|2	2|2	1|1	---	---	1	1	-	-	---	---	1	1	-	-	---	---	1	1	-	-	---	---	1	1	-	-	CL14088.Contig2_All	89.29	3e-07	gi|224093372|ref|XP_002334838.1|	predicted protein [Populus trichocarpa] >gi|222875354|gb|EEF12485.1| predicted protein [Populus trichocarpa]	77.14	1e-26	sp|P19954|PRSP1_SPIOL	Ribosome-binding factor PSRP1, chloroplastic OS=Spinacia oleracea GN=PSRP1 PE=1 SV=2	87.1	8e-24	B9NGT0	B9NGT0_POPTR Predicted protein OS=Populus trichocarpa GN=POPTRDRAFT_582827 PE=4 SV=1	all3184
345	CL52.Contig4_All	297 899 NADP-dependent malic enzyme [Nicotiana benthamiana] >CL52.Contig7_All 281 883 NADP-dependent malic enzyme [Nicotiana benthamiana] >CL52.Contig10_All 239 841 NADP-dependent malic enzyme [Nicotiana benthamiana]	27646	MESTLKELNGGSVLDLEDKAGVGGGVEDVYGEDRASENQSITPWTVSVASGYTLLRDPHHNKGLAFTEKERDAHYLTGLLPPVVLSQELQEKRLMHILRQYKVPLQRYMAMMDLQERNEKLFYKLLMDNVEELLPVVYTPTVGEACQKYGSIFKRPQGLYISLKEKGKILEVLKNWPEKSIQVIVVTDGERILGLGDLGCQ	78|37	13.4|6.0	-|-	2|1	2|1	2|1	2|1	---	---	1	1	-	-	---	---	1	1	-	-	---	---	1	1	-	-	---	---	1	1	-	-	CL52.Contig4_All	96.1	1e-37	gi|259661774|emb|CAZ48463.1|	NADP-dependent malic enzyme [Acroceras tonkinense]	83.83	3e-83	sp|Q9XGZ0|MAOP3_ARATH	NADP-dependent malic enzyme 3 OS=Arabidopsis thaliana GN=NADP-ME3 PE=1 SV=1	91.59	9e-53	I1HR34	I1HR34_BRADI Uncharacterized protein OS=Brachypodium distachyon GN=BRADI2G48570 PE=4 SV=1	STM1566
346	Unigene8164_All	258 1130 unknown [Glycine max]	38715	MESAAVLRSFQYAVSSSSHLKPMLERPGTITMNNAAFCNLNKLPVYGGKIISSTSRRGALLVSCVKTSEATAAKSKGDPNGAVLSDSQQNGLLEKKSPIGATFPNGFEALLSEVCDETKIAELKVKFGAFEIHMKRNIDGPTIPAPVVSQTTIPPVPSKPANESTSAVPPPPPKSSAEKVSPFTNVSVEKAAKLAALEASGSSGYVIVSSPTVGSFRRARTLKGKKQPPACKEGDVIKEGQMIGFLDQFGTELPVRSDVAGEVLKLLYKDGEAVGYGDPLIAVLPSFHGIK	31|-	10.0|-	-|-	2|-	2|-	2|-	2|-	---	-	1	-	-	-	---	-	-	-	-	-	---	-	1	-	-	-	---	-	-	-	-	-	Unigene8164_All	62.79	4e-27	gi|462411937|gb|EMJ16986.1|	hypothetical protein PRUPE_ppa009827mg [Prunus persica]	-	-	-	-	61.63	7e-26	B9RV21	B9RV21_RICCO Biotin carboxyl carrier protein of acetyl-CoA carboxylase, putative OS=Ricinus communis GN=RCOM_0898160 PE=4 SV=1	all5057
347	CL6751.Contig1_All	234 2348 hypothetical protein VITISV_011432 [Vitis vinifera]	90885	MEQSRRAVESYWRSRMVDGATSDEDKVTPVYKLEEICDLLRSSHVSIVKEVSEFILKRLEHKSPIVKQKVLRVIKYAVGKSGSEFRREMQRNSVAVRLLIHYKGQPDPLKGDALNKAVRETAQEALSALFSSDESKAAPTESSLGSRIQGFGNTNYEMPSEDKKSFISEVVDIGSATIKQGLNSLTQSPSLRKNNDTGSYKSPNLRRSLTRESDYSDRYEGIGSHDETHNSSRFLKNAGSGNWGQDISASQAETSSGDSASTYCQKTREEKLLETVVTSGGVRLQPTRDALHVFLVEASKLNALSLGHAIETKLKSPMWQVRMKAICVLEAVLRKKDDENFSVISSYFSDNSDVVVQCSESPQASLREKANKVLSLLGGEQSGGGINHVEKSANTPQPS…	-|35	-|2.1	-|3	-|1	-|1	-|1	-|1	-	---	-	1	-	-	-	---	-	-	-	-	-	---	-	1	-	-	-	---	-	-	-	-	CL6751.Contig1_All	82.31	1e-56	gi|159164081|pdb|2DCP|A	Chain A, Fully Automated Nmr Structure Determination Of The Enth-Vhs Domain At3g16270 From Arabidopsis Thaliana	55.34	0	sp|Q9C5H4|Y3627_ARATH	VHS domain-containing protein At3g16270 OS=Arabidopsis thaliana GN=At3g16270 PE=1 SV=1	64.66	1e-45	D8SEJ6	D8SEJ6_SELML Putative uncharacterized protein (Fragment) OS=Selaginella moellendorffii GN=SELMODRAFT_114993 PE=4 SV=1	-
348	CL5702.Contig1_All	141 824 minus strand conserved hypothetical protein [Ricinus communis] >gi|223541360|gb|EEF42911.1| conserved hypothetical protein [Ricinus communis]	30095	SSSLTLPHKNPLPFLTTPIKASLSQNTPQFQKLLQSPQWVSSVRSKSLNFLMSGTLALALSLTGVGFAEGKVGVNKPELLPKEFTTVIDVAGFLSDGQEKRIVQEIAVLEKDTGYKLRVLAQNYPDTPGLAIKDFWKVDDNTIVFVADPTFGNILNFNVGASVDLDIPRSFWSRLAGKYGNIFYWKEKGEDASIEAAVMAISTCLREPVGANNCSELEEETVFLRERE	50|42	4.4|4.4	-|-	2|1	2|1	1|1	1|1	2.322	---	2	1	*	-	---	---	-	1	-	-	---	---	1	1	-	-	---	---	1	1	-	-	CL5702.Contig1_All	85.08	5e-88	gi|297792641|ref|XP_002864205.1|	thylakoid lumen 15.0 kDa protein [Arabidopsis lyrata subsp. lyrata] >gi|297310040|gb|EFH40464.1| thylakoid lumen 15.0 kDa protein [Arabidopsis lyrata subsp. lyrata]	84.53	3e-87	sp|Q9LVV5|TL15B_ARATH	Thylakoid lumenal 15.0 kDa protein 2, chloroplastic OS=Arabidopsis thaliana GN=At5g52970 PE=1 SV=2	85.08	5e-87	D7MSA9	D7MSA9_ARALL Thylakoid lumen 15.0 kDa protein OS=Arabidopsis lyrata subsp. lyrata GN=ARALYDRAFT_495362 PE=4 SV=1	-
349	Unigene33600_All	1 795 cell division control protein [Nicotiana glutinosa]	34420	REDEDRLDEVGYDDVGGVRKQMAQIRELVELPLRHPQLFKSIGVKPPKGILLYGPPGSGKTLIARAVANETGAFFFCINGPEIMSKLAGESESNLRKAFEEAEKNAPSIIFIDEIDSIAPKREKTNGEVERRIVSQLLTLMDGLKARAHIIVIGATNRPNSIDPALRRFGRFDREIDIGVPDEVGRLEVLRIHTKNMKLAEDVDLERIAKDTHGYVGADLAALCTEAALQCIREKMDVIDLEDDSIDAEILNSMAVTNEHFQTAL	375|156	12.1|15.5	-|-	13|4	5|2	3|3	1|1	0.908	0.448	5	2	-	*	1.158	1.218	3	2	-	-	1.002	1.337	4	2	-	-	0.917	0.719	2	2	-	-	Unigene33600_All	98.87	7e-151	gi|449440119|ref|XP_004137832.1|	PREDICTED: cell division cycle protein 48 homolog [Cucumis sativus] >gi|449525650|ref|XP_004169829.1| PREDICTED: cell division cycle protein 48 homolog [Cucumis sativus]	96.98	1e-149	sp|P54609|CD48A_ARATH	Cell division control protein 48 homolog A OS=Arabidopsis thaliana GN=CDC48A PE=1 SV=1	97.74	3e-148	I1LZ82	I1LZ82_SOYBN Uncharacterized protein OS=Glycine max PE=4 SV=1	YDL126c
350	Unigene29479_All	260 1273 PREDICTED: auxin-induced protein PCNT115 isoform 1 [Vitis vinifera]	44876	VPRMKLGSQGLEVSAQGLGCMGMSAFYGPPKPDAEMIELIHHAISSGVTHLDTSDLYGPYTNEILLGKALKGGMREKAELATKFGIKLDGWDMEIIGDPSFVRSSCEASLKRLDVDCIDLYYQHRIDTRLPIEVTVGELKKLVEEGKIKYVGLSEASASTIRRAHAVHPITAVQLEWSLWAREAEEEIIPTCRELGIGIVAYSPLGRGFFSGGAELIKDLTKDDYRKVLPRFQPENLEHNKNLFERVKDMATRKGCTPSQLSLAWVHHQGNDVCPIPGTTKIANLNQNIGALAVKLTPDDMAELEFIASAGAVKGDLNRPDYLTWKNSNTPPLSTWKS	-|427	-|24.3	-|-	-|17	-|1	-|6	-|1	-	---	-	1	-	-	-	---	-	1	-	-	-	---	-	1	-	-	-	---	-	1	-	-	Unigene29479_All	82.38	1e-91	gi|357502827|ref|XP_003621702.1|	Aldo/keto reductase [Medicago truncatula] >gi|355496717|gb|AES77920.1| Aldo/keto reductase [Medicago truncatula]	79.59	7e-140	sp|P40691|A115_TOBAC	Auxin-induced protein PCNT115 OS=Nicotiana tabacum PE=2 SV=1	82.38	1e-90	G7KTV6	G7KTV6_MEDTR Aldo/keto reductase OS=Medicago truncatula GN=MTR_7g021850 PE=4 SV=1	AGc447
351	CL3623.Contig1_All	121 372 PREDICTED: mitochondrial import inner membrane translocase subunit Tim13 [Vitis vinifera] >gi|297742475|emb|CBI34624.3| unnamed protein product [Vitis vinifera]	11113	MDSFSSPSSGSSPKFSADDLMDQLKVQLAQAYAEEFLETVRGKCFDKCITKPGSSLSGSEASCISRCVERYIEATGIIGRALFN	-|21	-|13.1	-|-	-|1	-|1	-|1	-|1	-	---	-	-	-	-	-	---	-	-	-	-	-	---	-	-	-	-	-	---	-	-	-	-	CL3623.Contig1_All	89.39	1e-23	gi|255555823|ref|XP_002518947.1|	Mitochondrial import inner membrane translocase subunit Tim13, putative [Ricinus communis] >gi|223541934|gb|EEF43480.1| Mitochondrial import inner membrane translocase subunit Tim13, putative [Ricinus communis]	81.54	6e-20	sp|Q9XGY5|TIM13_ORYSJ	Mitochondrial import inner membrane translocase subunit Tim13 OS=Oryza sativa subsp. japonica GN=TIM13 PE=3 SV=2	89.39	1e-22	B9RYX8	B9RYX8_RICCO Mitochondrial import inner membrane translocase subunit Tim13, putative OS=Ricinus communis GN=RCOM_1314610 PE=4 SV=1	-
352	CL355.Contig11_All	165 329 minus strand homogentisate 1,2-dioxygenase [Solanum lycopersicum]	6362	LWITTECGRLQVSPGEIVVLPQGLRFVVDLPDGPSRGYVAEIFGTHFQLPDLGPI	40|-	29.1|-	2|-	1|-	1|-	1|-	1|-	---	-	-	-	-	-	---	-	1	-	-	-	---	-	-	-	-	-	---	-	1	-	-	-	CL355.Contig11_All	92.73	8e-24	gi|255554698|ref|XP_002518387.1|	homogentisate 1,2-dioxygenase, putative [Ricinus communis] >gi|223542482|gb|EEF44023.1| homogentisate 1,2-dioxygenase, putative [Ricinus communis]	85.45	9e-21	sp|Q5VRH4|HGD_ORYSJ	Homogentisate 1,2-dioxygenase OS=Oryza sativa subsp. japonica GN=HGO PE=2 SV=1	92.73	1e-22	B9RXB8	B9RXB8_RICCO Homogentisate 1,2-dioxygenase, putative OS=Ricinus communis GN=RCOM_1743950 PE=4 SV=1	PA2009
353	Unigene10367_All	1 252 ndhH gene product (chloroplast) [Sesamum indicum] >gi|347448352|gb|AEO92763.1| NADH dehydrogenase subunit 7 (chloroplast) [Sesamum indicum]	12082	FISKKPSPTFELSKQELYVRVEAPKGELGIFLIGDQSVFPWRWKIRPPGFINLQILPQLVKRMKLADIMTILGSIDIIMGEVDR	-|40	-|20.2	-|-	-|1	-|1	-|1	-|1	-	---	-	1	-	-	-	---	-	1	-	-	-	---	-	1	-	-	-	---	-	1	-	-	Unigene10367_All	100	1e-41	gi|108773185|ref|YP_635695.1|	NADH dehydrogenase subunit 7 [Solanum tuberosum] >gi|122209870|sp|Q2VEC5.1|NDHH_SOLTU RecName: Full=NAD(P)H-quinone oxidoreductase subunit H, chloroplastic; AltName: Full=NAD(P)H dehydrogenase subunit H; AltName: Full=NADH-plastoquinone oxidoreductase 49 kDa subunit; AltName: Full=NADH-plastoquinone oxidoreductase subunit H >gi|82754679|gb|ABB90093.1| NADH dehydrogenase subunit 7 [Solanum tuberos…	100	3e-42	sp|Q09FZ0|NDHH_PLAOC	NAD(P)H-quinone oxidoreductase subunit H, chloroplastic OS=Platanus occidentalis GN=ndhH PE=3 SV=1	100	1e-40	D3WD64	D3WD64_9MAGN NADH-plastoquinone oxidoreductase subunit 7 protein OS=Berberidopsis corallina GN=ndhH PE=3 SV=1	alr3355
354	CL9330.Contig1_All	110 1834 minus strand unnamed protein product [Vitis vinifera]	76322	LLQNSHFDLLFSIFLADPAMDFIKVFDQTVREIKREVNLKVLKVPEIEQKVLDATDDEPWGPHGTVLAEIAQATKKFTECQMVMNVLWTRLTETGKNWRFVYKSLTVIEYLVAHGSERAVDDIIEHAFQISSLASFEYVEPSGKDVGINVRKKAETIVALLNNKDKIQVVRNKAAANREKYVGLSSSGITYKSGAASFTSTSFKNNDQYGGFGNRGDSETFKDSYKDKDQYGEDKYERTTKSKKESSHSGSMGQDAPATGASISSTKTSKPDKYASVTSQNAPSDKYDDDFDDFDPRGTSSAKPSSGSHQVDLFGQDFVGDLLDAPVGVPTDKSTSLHNDPSEVDLFADAAFVSATPLPAGGKNPEPQINVDLFGSQPAPSPDVSTTMDFFAAPDAVSQ…	104|-	1.9|-	3|-	4|-	4|-	1|-	1|-	0.57	-	4	-	*	-	0.697	-	2	-	-	-	0.874	-	4	-	-	-	0.334	-	2	-	-	-	CL9330.Contig1_All	80.26	9e-25	gi|388522735|gb|AFK49429.1|	unknown [Lotus japonicus]	56.83	8e-141	sp|Q8VY07|EPN1_ARATH	Clathrin interactor EPSIN 1 OS=Arabidopsis thaliana GN=EPSIN1 PE=1 SV=1	65.32	3e-66	A9S0U9	A9S0U9_PHYPA Predicted protein OS=Physcomitrella patens subsp. patens GN=PHYPADRAFT_180155 PE=4 SV=1	-
355	CL2816.Contig2_All	157 1359 minus strand Hop-interacting protein THI032 [Solanum lycopersicum]	51000	MDYVNGPGRNHLFVPGPVNIPEQVIRAMNRNNEDYRSPAVPALTKILLEDVKKIFKTTSGTPFLIPTTGTGAWESALTNTLSPGDRIVSFLIGQFSLLWIDQQQRLNFNVDVVESDWGQGANLDVLASKIAEDNAHTIKAICIVHNETATGVTNNLATVRKILDHYQHPALFLVDGVSSICALDFRMDEWGIDVALTGSQKALSLPTGMGIVCASPKALEATKTAKSVRVFFDWNDYLKFYKLGTYWPYTPSIQLLYGLRAGLDLIFEEGLDNVIARHGRLAKATRLAVEAWGLKNCTQKEEWYSDTVTAVIVPSYIDSSEIVRRAWKRYNLSLGLGLNKVAGKVFRIGHLGNLNELQLLGCLAGVEMVLKDVGYPVKLGSGVAAASAYLQNSTPLIPS…	-|417	-|20.4	-|1	-|13	-|13	-|6	-|6	-	0.57	-	7	-	*	-	1.121	-	6	-	-	-	1.158	-	7	-	-	-	0.629	-	6	-	-	CL2816.Contig2_All	96.47	3e-43	gi|156712240|emb|CAM59867.2|	alanine:glyoxylate aminotransferase [Lathraea squamaria]	88.28	0	sp|Q56YA5|SGAT_ARATH	Serine--glyoxylate aminotransferase OS=Arabidopsis thaliana GN=AGT1 PE=1 SV=2	93.27	0	G8Z261	G8Z261_SOLLC Hop-interacting protein THI032 OS=Solanum lycopersicum PE=2 SV=1	mlr1322
356	CL4968.Contig1_All	680 2503 minus strand RecName: Full=Heat shock protein 83 >gi|169296|gb|AAA33748.1| heat shock protein 83 [Ipomoea nil] >gi|445625|prf||1909372A heat shock protein 83 >CL4968.Contig2_All 677 2500 minus strand RecName: Full=Heat shock protein	93456	DLVNNTIARSGTKEFMEALQAGADVSMIGQFCVGFYSAYLVAEKVIVTTKHNDDEQYIWESQAGGSFTVTRDINGEQLGRGTKITLFLKEDQLEYLEERRIKDLVKKHSEFISYPIYLWTEKTTEKEISDDEDDEPKKEEEGDVEEVDEEKEKDKGKKKKIKEVSHEWQLINKQKPIWLRKPEEITKEEYASFYKSLTNDWEDHLAVKHFSVEGQLEFKAVLFVPKRAPFDLFDTRKKMNNIKLYVRRVFIMDNCEELIPEYLGFVKGVVDSDDLPLNISREMLQQNKILKVIRKNLVKKCIEMFNEIAENKEDYTKFYEAFSKNLKLGIHEDSQNRAKLADLLRYHSTKSGDEMTSLKDYVTRMKEGQKDIYYITGESKKAVENSPFLERLKKKGYEV…	-|329	-|11.2	-|1	-|18	-|1	-|8	-|1	-	---	-	-	-	-	-	---	-	-	-	-	-	---	-	-	-	-	-	---	-	-	-	-	CL4968.Contig1_All	95.88	0	gi|547684|sp|P36182.1|HSP82_TOBAC	RecName: Full=Heat shock protein 82 >gi|19880|emb|CAA44877.1| heat shock protein 82 [Nicotiana tabacum]	95.88	0	sp|P36182|HSP82_TOBAC	Heat shock protein 82 (Fragment) OS=Nicotiana tabacum GN=HSP82 PE=2 SV=1	95.14	0	I1L314	I1L314_SOYBN Uncharacterized protein OS=Glycine max GN=Gma.23666 PE=4 SV=1	SPAC926.04c
357	CL4130.Contig10_All	60 986 protein transporter, putative [Ricinus communis] >gi|223540489|gb|EEF42056.1| protein transporter, putative [Ricinus communis]	38898	GVKDEIIVDLVDQCRSYQKRVTILVNNTVDEDLLCKGLALNDNLQRVLRRHDDIAKGTPAVSVVNRETPVAPLLNVNHEDDESEDDFAQLARRSSRDTMQGLASKPAVVKSEPVQISPILPPPPSSRKPTSTDSSTVDYLSGDVYETERSLRTSGSTSTAVPTHSSNQKSIPPPSPTLSSSPPDDLINPTASMFAPKSTYDEPAPTSKSADQLPTAPWDVPATGNLPPPPSKYNQRQQFFEHHHGHGGGPSRSSSGSGSSYDSLVGQTQNLSIKAPAPSKQEKPEDALFRDLVDFAKAKSSSPKPNRSF	41|90	7.8|22.7	3|3	1|4	1|4	1|4	1|4	---	1.149	1	2	-	-	---	---	1	1	-	-	---	---	-	1	-	-	---	1.37	-	2	-	-	CL4130.Contig10_All	68.42	1e-16	gi|226508316|ref|NP_001151446.1|	VHS and GAT domain protein [Zea mays] >gi|195646866|gb|ACG42901.1| VHS and GAT domain protein [Zea mays]	-	-	-	-	68.42	1e-15	B6U0L8	B6U0L8_MAIZE VHS and GAT domain protein OS=Zea mays PE=2 SV=1	-
358	CL10067.Contig2_All	156 884 minus strand Os11g0312400 [Oryza sativa Japonica Group] >gi|585338|sp|Q08480.1|KAD2_ORYSJ RecName: Full=Adenylate kinase B; Short=AK B; AltName: Full=ATP-AMP transphosphorylase B >gi|391879|dbj|BAA01181.1| adenylate kinase-b [Oryza sativ	34736	MSAAGNLEDVPSVDLMTELLRRMKCESKPDKRLILVGPPGSGKGTQSPLIKDEYCLCHLATGDMLRAAVAAKTPLGIKAKEAMEKGELVSDDLVVGIIDDALKKPSCQKGFILDGFPRTVVQAQKLDEMLDKRGVKVDKVLNFAIDDAILEERITGRWIHPSSGRTYHTKFAPPKVPGVDDVTGEPLIQRKDDTAAVLKSRLEAFHMQTEPVIDYYNKKSIVANLPAEKPPQEVTSEVKKALS	-|211	-|20.2	-|-	-|8	-|1	-|4	-|1	-	---	-	1	-	-	-	---	-	1	-	-	-	---	-	1	-	-	-	---	-	1	-	-	CL10067.Contig2_All	92.74	7e-62	gi|357477155|ref|XP_003608863.1|	Adenylate kinase B [Medicago truncatula] >gi|355509918|gb|AES91060.1| Adenylate kinase B [Medicago truncatula]	89.71	6e-128	sp|Q08480|KAD2_ORYSJ	Adenylate kinase B OS=Oryza sativa subsp. japonica GN=ADK-B PE=2 SV=1	92.74	7e-61	G7JMK0	G7JMK0_MEDTR Adenylate kinase B OS=Medicago truncatula GN=MTR_4g103800 PE=3 SV=1	SPAC4G9.03
359	Unigene5824_All	165 659 RecName: Full=Calcium-binding allergen Ole e 8; AltName: Full=PCA18/PCA23; AltName: Allergen=Ole e 8 >gi|6901652|gb|AAF31151.1|AF078679_1 calcium-binding protein [Olea europaea]	22012	MAMNPTPNSKPTMYLQDMDEVRKVFDRFDTNSDGKISADELGGVLNALGSETSAEEVARMMQEIDTDKDGHINLQEFAAFCNGDSDPYKSAEKELREAFELYDQDHNGKISAVELHKILTRLGEHCSVQDCAGMIKSVDSDGDGYVCFEEFRKMMTTTNNSIRNS	219|554	14.5|14.5	-|-	4|9	4|9	1|1	1|1	0.007	0.854	2	6	-	-	---	1.739	1	4	-	-	---	1.191	1	4	-	-	0.001	1.186	2	6	-	-	Unigene5824_All	69.33	4e-55	gi|460392121|ref|XP_004241666.1|	PREDICTED: calcium-binding allergen Ole e 8-like [Solanum lycopersicum]	69.09	7e-60	sp|Q9M7R0|ALL8_OLEEU	Calcium-binding allergen Ole e 8 OS=Olea europaea PE=1 SV=1	59.29	3e-27	D3Y1T1	D3Y1T1_9FABA Calmodulin 24-like protein (Fragment) OS=Bauhinia guianensis GN=Cml24 PE=4 SV=1	SPAC3A12.14
360	CL1795.Contig18_All	333 3200 minus strand plasma membrane H+-ATPase [Solanum lycopersicum] >gi|5901757|gb|AAD55399.1|AF179442_1 plasma membrane H+-ATPase isoform LHA2 [Solanum lycopersicum] >gi|9789539|gb|AAF98344.1|AF275745_1 plasma membrane H+-ATPase [Solanum lyc	121512	MGEKPEVLDAVLKETVDLENIPIDEVLENLRCTREGLTTAAAQERLAIFGHNKLEEKKESKFLKFLGFMWNPLSWVMEAAAIMAIALANGGGKPPDWQDFVGIITLLFINSTISFIEENNAGNAAAALMARLAPKAKVLRDGRWSEEEASILVPGDIISIKLGDIIPADARLLEGDPLKIDQSALTGESLPVTKGPGDGVYSGSTCKQGEIEAIVIATGVHTFFGKAAHLVDTTNHVGHFQKVLTAIGNFCICSIAVGMIIEIIVMYPIQHREYRPGIDNLLVLLIGGIPIAMPTVLSVTMAIGSHRLAQQGAITKRMTAIEEMAGMDVLCSDKTGTLTLNKLTVDRNLIEVFAKGVDADTVVLMAARASRTENQDAIDGAIVGMLADPKEARAGIREV…	-|657	-|16.2	-|3	-|24	-|1	-|12	-|1	-	---	-	1	-	-	-	---	-	1	-	-	-	---	-	1	-	-	-	---	-	1	-	-	CL1795.Contig18_All	94.35	0	gi|350535937|ref|NP_001234477.1|	plasma membrane H+-ATPase [Solanum lycopersicum] >gi|5901757|gb|AAD55399.1|AF179442_1 plasma membrane H+-ATPase isoform LHA2 [Solanum lycopersicum] >gi|9789539|gb|AAF98344.1|AF275745_1 plasma membrane H+-ATPase [Solanum lycopersicum]	94.13	0	sp|Q08435|PMA1_NICPL	Plasma membrane ATPase 1 OS=Nicotiana plumbaginifolia GN=PMA1 PE=2 SV=1	94.52	0	B9R933	B9R933_RICCO H(\+)-transporting atpase plant/fungi plasma membrane type, putative OS=Ricinus communis GN=RCOM_1513370 PE=4 SV=1	MA1678
361	Unigene30684_All	278 3292 minus strand PREDICTED: protein TIC110, chloroplastic-like [Vitis vinifera] >gi|297745792|emb|CBI15848.3| unnamed protein product [Vitis vinifera]	132409	MNQSILLTTTPCSPHPKTLFLATFLSPTTPLRFSSTHLCRRRHRYKISTIRSSSDRPSTSTVKPDVFGEKRELTGVQSLVDAMSPPIRIASSALIVAAAVAAGYGLGSRFGGSRNAGLGGAVVIGAAGAGAAYALNSCVPDVAAANVHNYVVGCDDPGAVKKEDIEAIANKYGVSKQNEAFNAELCDIYCRFVSAVLPPGSEDLNGDEVETIIKFKNSLGIDEPDAAAMHMEIGRRIFRQRLETGDREADMEQRRAFQKLIYVSNLVFGEASGFLLPWKRVFKVTDAQVEVAVRDNAQRLYAFKLESVSQDVDVTQLISLREAQLLYRLSDELAEDMFREHTRKLVEQNISAALSVLKSRTRAVQRVIEELDKILAFNNLLISLKNHPDASRFARGIGP…	43|116	2.1|7.9	-|-	2|7	2|7	2|6	2|6	---	1.293	1	2	-	-	---	2.561	-	2	-	-	---	0.692	-	2	-	-	---	318.729	1	2	-	-	Unigene30684_All	78.58	0	gi|449506320|ref|XP_004162715.1|	PREDICTED: protein TIC110, chloroplastic-like [Cucumis sativus]	67.22	0	sp|Q8LPR9|TI110_ARATH	Protein TIC110, chloroplastic OS=Arabidopsis thaliana GN=TIC110 PE=1 SV=1	76.4	0	D7SJM2	D7SJM2_VITVI Putative uncharacterized protein OS=Vitis vinifera GN=VIT_06s0004g07730 PE=4 SV=1	-
362	CL6429.Contig2_All	201 533 protein disulfide isomerase [Gossypium hirsutum]	14926	PGVGTVKSLLQSMKSLVRVLRRQNQFULERLIVMSIKAFAANMGFLGILPSNGFPRGLWSQKKYEGARTAEALAEFVNNQGGTNVKIAAIPSNVVVLTPENFDQIALDEKK	-|39	-|21.6	-|1	-|1	-|1	-|1	-|1	-	---	-	1	-	-	-	---	-	1	-	-	-	---	-	1	-	-	-	---	-	1	-	-	CL6429.Contig2_All	72.92	1e-14	gi|222424840|dbj|BAH20372.1|	AT2G47470 [Arabidopsis thaliana]	48.08	6e-09	sp|Q86IA3|PDI1_DICDI	Protein disulfide-isomerase 1 OS=Dictyostelium discoideum GN=pdi1 PE=1 SV=2	72.92	2e-13	B9DI05	B9DI05_ARATH AT2G47470 protein (Fragment) OS=Arabidopsis thaliana GN=AT2G47470 PE=2 SV=1	-
363	Unigene1421_All	82 2289 minus strand serine protease [Coffea arabica]	89559	LICMFCISPWPTFAADIPEKSSLETYIVHVEGPDGQLTTQSEDLESWYHSFLPATTASSNEGEARLIHSYHTVFKGFAARLSPDEVKDMEKKNGFISARPEKKLLLHTTHSPNFLGLNQNMGLWKESNYGKGVIIGVLDTGILPEHPSFSDEGMPPPPAKWKGKCEFNHTTCNNKIIGARYFSDGNDSPLDDDGHGTHTASTAAGNFVKGANLFGNANGTAVGIAPLAHLAIYRICAPFCSESSILAGMDTAIEDGVDVLSISLGQLTNDFFQDFIALGAFSAMEKGILVSCSAGNYGPLNFSLANEAPWILTVGASTTDRKLRATAVLGNNQQFHGESAYQPKDFPSTLLPLVYAGMLNTSDPDAPFCSSESLNQSDVQGKIVLCELGGGITRIEKGE…	-|53	-|2.9	-|-	-|2	-|2	-|1	-|1	-	---	-	1	-	-	-	---	-	1	-	-	-	---	-	1	-	-	-	---	-	1	-	-	Unigene1421_All	70.32	0	gi|460401239|ref|XP_004246134.1|	PREDICTED: subtilisin-like protease-like [Solanum lycopersicum]	45.18	9e-170	sp|O65351|SUBL_ARATH	Subtilisin-like protease OS=Arabidopsis thaliana GN=ARA12 PE=1 SV=1	66.98	0	F1DGA6	F1DGA6_COFAR Serine protease OS=Coffea arabica GN=MA29G21.13 PE=4 SV=1	BH0831
364	Unigene45808_All	3 284 minus strand RAB GTPase-like protein A4D [Arabidopsis thaliana] >gi|75334990|sp|Q9LH50.1|RAA4D_ARATH RecName: Full=Ras-related protein RABA4d; Short=AtRABA4d >gi|12322042|gb|AAG51065.1|AC069472_5 ras-related GTP-binding protein; 5118-4176	12879	IGVEFQTKTLVIDHKTVKAQIWDTAGQERYRAVTSAYYRGAVGAMLVYDMTKRQSFDHMARWLEELRGHADKNIVIMLIGNKCDLGTLRAVPTE	19|-	14.9|-	-|-	1|-	1|-	1|-	1|-	---	-	-	-	-	-	---	-	-	-	-	-	---	-	-	-	-	-	---	-	-	-	-	-	Unigene45808_All	97.87	4e-50	gi|449464898|ref|XP_004150166.1|	PREDICTED: ras-related protein RABA4d-like [Cucumis sativus] >gi|449476501|ref|XP_004154754.1| PREDICTED: ras-related protein RABA4d-like [Cucumis sativus]	96.81	3e-50	sp|Q9LH50|RAA4D_ARATH	Ras-related protein RABA4d OS=Arabidopsis thaliana GN=RABA4D PE=1 SV=1	96.81	1e-48	D7KZQ3	D7KZQ3_ARALL Predicted protein OS=Arabidopsis lyrata subsp. lyrata GN=ARALYDRAFT_672041 PE=3 SV=1	SPAC18G6.03
365	CL9974.Contig1_All	624 1028 peptidyl-prolyl cis-trans isomerase-like 3 [Arabidopsis thaliana] >gi|8570445|gb|AAF76472.1|AC020622_6 Contains similarity to cyclophilin E from Dictyostelium discoideum gb|AF215865 and contains a Cyclophilin type peptidyl-prolyl cis-tra	17567	QNFLALCASGYYDGTIFHRNIKGFMIQGGDPTNTGKGGTSIWGKKFNDEIRESLKHNARGMLSMANSGPNTNGSQFFIAYAKQPHLNGLYTIFGKVIHGFEVLDIMEKAPTGPGDRPLMEIRINRVTIHANPLAG	-|30	-|9.6	-|2	-|1	-|1	-|1	-|1	-	---	-	1	-	-	-	---	-	-	-	-	-	---	-	1	-	-	-	---	-	-	-	-	CL9974.Contig1_All	94.81	4e-72	gi|462414994|gb|EMJ19731.1|	hypothetical protein PRUPE_ppa012641mg [Prunus persica]	70.21	3e-52	sp|P0C1I5|PPIL3_RHIO9	Peptidyl-prolyl cis-trans isomerase-like 3 OS=Rhizopus delemar (strain RA 99-880 / ATCC MYA-4621 / FGSC 9543 / NRRL 43880) GN=cyp4 PE=3 SV=1	93.68	2e-46	A9XNX5	A9XNX5_9MYRT Peptidyl-prolyl cis-trans isomerase cyclophilin-type family protein (Fragment) OS=Sonneratia apetala PE=3 SV=1	SPAC21E11.05c
366	Unigene16693_All	35 1381 PREDICTED: omega-hydroxypalmitate O-feruloyl transferase [Vitis vinifera] >gi|298205046|emb|CBI38342.3| unnamed protein product [Vitis vinifera]	59215	MVTLYQAPPEPAIQDLKVAIQGSNLIYPSQETENKSIFLSNIDQVLNFHVQTVHFFPANPDFPPEIAVARLKNALEKVMVPYDFLAGRLKLNHQTGRLEIECNASGAGFVVATTEFSLDEIGDLVYPNPAFMQLIVQGLDKFDDQPLCVFQVTSFKCGGFALGISTNHVLFDGMSFKIFLENLASQAFDDKPVPIMPCNDRRLLAARSPPQVTFPHPELLKLKPPIGEEESPPVFDCKQEDLDFKIFSLSPSDISYLKEKAKAGGTNSTTKITGFNVVTAHVWRCKALSCDVENNRDRESMVLYAVDIRSRLKPPLPASYCGNAVLSAYASAKCSELEEEPFSKVVDMVAEGARRMSDEYARSAIDWGEVYKGFPNGEFLISSWWRLGFDEVVYPWGKP…	-|16	-|2.2	-|-	-|1	-|1	-|1	-|1	-	---	-	-	-	-	-	---	-	-	-	-	-	---	-	-	-	-	-	---	-	-	-	-	Unigene16693_All	71.62	0	gi|225469071|ref|XP_002270329.1|	PREDICTED: omega-hydroxypalmitate O-feruloyl transferase [Vitis vinifera] >gi|298205046|emb|CBI38342.3| unnamed protein product [Vitis vinifera]	34.19	1e-54	sp|Q94CD1|HHT1_ARATH	Omega-hydroxypalmitate O-feruloyl transferase OS=Arabidopsis thaliana GN=HHT1 PE=1 SV=1	71.62	0	D7U6H3	D7U6H3_VITVI Putative uncharacterized protein OS=Vitis vinifera GN=VIT_00s0207g00010 PE=4 SV=1	-
367	Unigene16560_All	118 1092 minus strand hypothetical protein VITISV_032629 [Vitis vinifera]	39849	PIPSMEDAYKFLNLVPNPDGSLTRLAQVPNLPAVPEIDPDNSSPELISLSKDIPLNPANNTFIRLFRPRNPPPNTKLPVIIYFHGGGFILLSAKSSIFHQSCNRMAAHIPALIASVEYRLAPEHRLPAAYDDALEAIMWAKTQALGGDGCDPWIKEFADFSRVFLMGSSAGGNMVYHAGLRALDLDLQPMKIVGLIMNQPFFGGVNRTESEIKYINDPLIPLHAADLMWSLSLPEGADRGHEYCNPCAGGSGEERIGRLPASVVRGYSGDPLVGKQKEFAKMLEARGVHVVPQFIDGGRHAVEIFEPKFAQALCDDIRDFVCSFA	37|-	4.0|-	-|-	1|-	1|-	1|-	1|-	---	-	-	-	-	-	---	-	-	-	-	-	---	-	-	-	-	-	---	-	-	-	-	-	Unigene16560_All	69.25	4e-131	gi|460368030|ref|XP_004229873.1|	PREDICTED: probable carboxylesterase 8-like [Solanum lycopersicum]	51.84	6e-94	sp|O64640|CXE8_ARATH	Probable carboxylesterase 8 OS=Arabidopsis thaliana GN=CXE8 PE=2 SV=1	62.2	3e-113	A5B239	A5B239_VITVI Putative uncharacterized protein OS=Vitis vinifera GN=VITISV_032629 PE=4 SV=1	MT1444
368	Unigene2646_All	208 573 minus strand PREDICTED: bet1-like SNARE 1-1 [Vitis vinifera] >gi|297744115|emb|CBI37085.3| unnamed protein product [Vitis vinifera]	15388	MNSIRDRNARAALFDGIEEGGIRASSSYSSHEIDEQENDRAIGGLQDRVNLLKRLSGDIHEEVESHNHMLDRMGNDMDASRGVLSGTMDKFKMVFETKSSRRMFTLVASFVVIFLVIYYLTR	65|39	10.7|10.7	7|7	2|1	2|1	1|1	1|1	0.711	---	2	1	-	-	---	---	-	-	-	-	0.89	---	2	1	-	-	---	---	-	-	-	-	Unigene2646_All	89.38	8e-54	gi|460389739|ref|XP_004240507.1|	PREDICTED: bet1-like SNARE 1-1-like isoform 4 [Solanum lycopersicum]	78.05	2e-47	sp|Q9M2J9|BET11_ARATH	Bet1-like SNARE 1-1 OS=Arabidopsis thaliana GN=BET11 PE=1 SV=1	86.99	2e-53	B9H8J7	B9H8J7_POPTR Predicted protein OS=Populus trichocarpa GN=POPTRDRAFT_559667 PE=4 SV=1	-
369	Unigene33426_All	138 596 uncharacterized protein LOC100805631 [Glycine max] >gi|297839753|ref|XP_002887758.1| ubiquitin-conjugating enzyme 1 [Arabidopsis lyrata subsp. lyrata] >gi|71040675|gb|AAZ20286.1| ubiquitin-conjugating enzyme 1 [Arachis hypogaea] >gi|29733	20598	MANSNLPRRIIKETQRLLSEPAPGISASPSEDNMRYFNVMILGPTQSPYEGGVFKLELFLPEEYPMAAPKVRFLTKIYHPNIDKLGRICLDILKDKWSPALQIRTVLLSIQALLSAPNPDDPLSENIAKHWKSNEAEAVETAKEWTRLYASGA	-|96	-|22.2	-|-	-|3	-|3	-|2	-|2	-	0.898	-	3	-	-	-	---	-	1	-	-	-	1.816	-	3	-	-	-	---	-	1	-	-	Unigene33426_All	100	3e-85	gi|359807381|ref|NP_001241639.1|	uncharacterized protein LOC100805631 [Glycine max] >gi|297839753|ref|XP_002887758.1| ubiquitin-conjugating enzyme 1 [Arabidopsis lyrata subsp. lyrata] >gi|71040675|gb|AAZ20286.1| ubiquitin-conjugating enzyme 1 [Arachis hypogaea] >gi|297333599|gb|EFH64017.1| ubiquitin-conjugating enzyme 1 [Arabidopsis lyrata subsp. lyrata] >gi|378464294|gb|AFC01194.1| ubiquitin-conjugating enzyme [Ammopiptanthus m…	99.35	3e-85	sp|Q94A97|UBC35_ARATH	Ubiquitin-conjugating enzyme E2 35 OS=Arabidopsis thaliana GN=UBC35 PE=1 SV=1	100	4e-84	D7KVV8	D7KVV8_ARALL Ubiquitin-conjugating enzyme 1 OS=Arabidopsis lyrata subsp. lyrata GN=ARALYDRAFT_895786 PE=3 SV=1	YDR092w
370	CL8657.Contig1_All	142 1260 minus strand PREDICTED: uncharacterized protein At5g39570 [Vitis vinifera]	48918	DEVDDFDEYDPTPYGGGYDIALTYGRQIPPSEETCYPNTSSASDDFDYDRPQYTSYAEPSAYADDALDNEYKSYARPKPRPAPPSYGGPPPAEAGYGYDGPKPNYGFQPEVNRPGGVYGGESEYGSGGGSEYGGRTEYGRPEPEFGSGYGRKPEYERPSSEYGKKPEYEEPGSDYGSGYGRKPDYERPEAEYGSEYGRKPEYKEPGSEYGSGYGRKPEYERPSSEYGSGHGRKSEYEEPTSEYSSGYVRKPGSEYGESEYGRKPESEEFGSGGYGQEESGGGYGYGRRPERSEYEEEKPSYGRPSYQTEGYERPSYGRSEEEDYRKPSYERRDDDDDDESYGRKKYGDDNSDDDGEEKKHGYKHHHHRKHYDD	203|199	21.2|20.4	-|-	8|6	8|6	5|4	5|4	0.229	0.187	7	5	-	-	1.552	2.961	5	2	-	-	0.632	---	5	1	-	-	0.36	0	5	4	-	-	CL8657.Contig1_All	78.79	7e-08	gi|296081450|emb|CBI14777.3|	unnamed protein product [Vitis vinifera]	37.95	3e-21	sp|Q9FKA5|Y5957_ARATH	Uncharacterized protein At5g39570 OS=Arabidopsis thaliana GN=At5g39570 PE=1 SV=1	78.79	6e-07	A5BG40	A5BG40_VITVI Putative uncharacterized protein OS=Vitis vinifera GN=VITISV_006002 PE=4 SV=1	-
371	CL10817.Contig1_All	142 3045 hypothetical protein VITISV_032620 [Vitis vinifera]	114640	MKEEAISSSGDPLLPPRSSSSPPPSLTPAASSAGASSPAVPTNAGSTDWFGQGQNSKGGSLSRIGSQPMYTSLSTSAGGSALGSSQPSCRPWERGDLLRRLSTFKPANWFGKPKAASSLTCARKGWVNVDVDEVECESCGAILKFVTSATWTLSEADGAGEDFARRLDEGHKVTCPWIGNCCAESLVQFPPTPPSALIGGYKDRCDGLLQFPSLPIVAVSAIEQMRVSRGPEIDRLLAHSQFARSESGIKLEILLGTENSREDVFLIYSRAQKLISLCGWEPRWLPNVQDCEEHSAQSARNGCSIGPSKYRGPPRDPSRGKKALSSSTKKDCGINEVIGTNSKSVSRSPLLDCSLCGATVRIWDFLTVSRPASFVPNSTDVPETSKKMVLTRGISAASG…	128|49	1.5|1.5	-|-	3|2	3|2	1|1	1|1	1.392	---	3	1	-	-	---	---	1	1	-	-	1.212	---	2	1	-	-	0.044	---	2	1	-	-	CL10817.Contig1_All	74.54	0	gi|460395306|ref|XP_004243225.1|	PREDICTED: uncharacterized protein LOC101253914 [Solanum lycopersicum]	31.15	1e-09	sp|Q80YV2|NIPA_MOUSE	Nuclear-interacting partner of ALK OS=Mus musculus GN=Zc3hc1 PE=1 SV=1	66.17	0	F6HLU0	F6HLU0_VITVI Putative uncharacterized protein OS=Vitis vinifera GN=VIT_10s0003g04030 PE=4 SV=1	-
372	CL7530.Contig1_All	381 1541 uncharacterized protein [Arabidopsis thaliana] >gi|330252261|gb|AEC07355.1| uncharacterized protein [Arabidopsis thaliana]	51123	EILLLRNPKLDDQPLEIAANEETSSKRIQQNAEESNGSDKDEDRGVVTVQYDTYSPAMTSGVKAGDILLDPDLDDVIVETQLSTDTTRDHHGTNDSFTKKMALPEEILQEMNLPSGENEFNMLCFSEDENLNVQVKTTNDYTGDGKTTEEDISCNLTSASKEGEGDQNKMTSEWEGLGNERNFAENLDTAAEKAGQENSTVMETITHATSDSDEFQSKKDLNSSFCKEEDIPIQKGDRAVTTPEDSGILLENTVNESHGDVEKQPKTLEDTVTNHSNPKVTEKTVESSLIQVDGSQMERDEQLEKESEKLPLTEVSTGDTNDNGSAVIDKVKDEDEDLSKAQLFENEKNTEGTSIKEEIFIESLQVAAEHITASASGQDRETSYLEE	361|593	16.5|22.0	-|-	10|14	8|10	4|5	2|2	1.467	1.142	7	9	-	-	0.851	0.74	5	7	-	-	0.578	0.483	8	8	*	*	0.701	0.803	6	6	*	-	CL7530.Contig1_All	-	-	-	-	-	-	-	-	-	-	-	-	-
373	CL819.Contig13_All	198 4196 minus strand hypothetical protein RCOM_0731250 [Ricinus communis] >gi|223540292|gb|EEF41863.1| hypothetical protein RCOM_0731250 [Ricinus communis] >CL819.Contig15_All 198 4196 minus strand hypothetical protein RCOM_0731250 [Ricinus	157127	MGFDIECIIDIHTYPGEYFCPVCRTLVYPNEAFQSQCTHLYCKPCLAHIANGSRACPYDGYLVTESDSKPLMDSDKALAENIGKVKVHCLYFRSGCTWEGSLSDCTTHCSGCSFGNSPVICNRCGIQIVHRQVHDHAQSCPGVYEGQQAVGGVSGLTRSGTISSTATAEVNQTVAQSVAPLSQAQNPQVIATTLVPGPNPNLQVNAPSQAPVVAPVALPTPEQWYQQQYQQYYQQYVGYDPYQQANQQYYPLQQQPFQQYQQHPVQVQGQHQSHIYSQAVPQPQPQPNPVPQAPQQPHLQPQTQGQAQSQPQPQSQLQLLPQAQPQVQVPPQGQAQMHAPIQALIPNYQVNPQQQPHPPMRPQTHIPSQALPPPPQSQSAQPPPFAQATVMRPPAQHPQ…	-|18	-|0.8	-|4	-|1	-|1	-|1	-|1	-	---	-	-	-	-	-	---	-	-	-	-	-	---	-	-	-	-	-	---	-	-	-	-	CL819.Contig13_All	75.52	1e-69	gi|297745966|emb|CBI16022.3|	unnamed protein product [Vitis vinifera]	-	-	-	-	75.52	1e-68	D7SK46	D7SK46_VITVI Putative uncharacterized protein OS=Vitis vinifera GN=VIT_06s0004g05880 PE=4 SV=1	-
374	Unigene23867_All	139 1164 minus strand predicted protein [Populus trichocarpa] >gi|222852373|gb|EEE89920.1| predicted protein [Populus trichocarpa]	45063	LEQNSEMQVPRVKLGSQGLEVSTLGFGCGGLSGILNAPLSHEAGGALLKEAFNKGITFFDTADIYGERGDNEIMIGKALKKLPREQVQISSKFGVSMPDKNQVQVKGSPEYVRQCIEASLMRLDVDYIDLYYQHRIDTSVPIEETVGELKKLVEEGKIRYIGLSEASKDTIKRAHAVHPITAVQMEYSLWSREIEEDVIPLCRELGIGIVAYSPLGHGFFGGKAITESLPSESLLEMHPRFTGDNLEKNKVLYARFASLAAKHSCTPPQLALAWLLHQGDDVVPIPGTTKIKNLEENIGSLAVKLTAEDLKEIGGAIPIDEVGGEREYGIFAKYTYRLANTP	103|41	8.5|7.9	-|-	4|2	4|2	2|2	2|2	0.005	0.91	2	2	-	-	---	---	1	1	-	-	12.705	1.882	2	2	-	-	---	---	1	1	-	-	Unigene23867_All	77.33	2e-157	gi|460404273|ref|XP_004247608.1|	PREDICTED: perakine reductase-like [Solanum lycopersicum]	67.37	3e-134	sp|Q3L181|PERR_RAUSE	Perakine reductase OS=Rauvolfia serpentina GN=PR PE=1 SV=1	74.56	8e-154	B9RTJ8	B9RTJ8_RICCO Aldo/keto reductase, putative OS=Ricinus communis GN=RCOM_0911030 PE=4 SV=1	DR2261
375	CL5093.Contig1_All	111 599 hypothetical protein VITISV_001330 [Vitis vinifera] >gi|297736088|emb|CBI24126.3| unnamed protein product [Vitis vinifera]	21882	AANPPPPPQVAVHPAVQPLSYLLGTWRGQGEGSFPTISPFKYSEELQFSHSPNKPVIAYSSKTWKLNSGEPMHSESGYWRPKLDGTIEVVIAQSTGLVEVQKGTYDAEQRSVKLKSALVGNASKVKEINRVFEMVNGELAYVVEMATNLTSLQSHLKAFLRKL	26|-	8.6|-	1|-	2|-	2|-	1|-	1|-	---	-	-	-	-	-	---	-	-	-	-	-	---	-	-	-	-	-	---	-	-	-	-	-	CL5093.Contig1_All	80	4e-62	gi|147857570|emb|CAN83082.1|	hypothetical protein VITISV_001330 [Vitis vinifera] >gi|297736088|emb|CBI24126.3| unnamed protein product [Vitis vinifera]	71.72	3e-56	sp|O64527|Y1926_ARATH	UPF0678 fatty acid-binding protein-like protein At1g79260 OS=Arabidopsis thaliana GN=At1g79260 PE=1 SV=1	80	4e-61	A5BBZ0	A5BBZ0_VITVI Putative uncharacterized protein OS=Vitis vinifera GN=VIT_19s0085g01130 PE=3 SV=1	-
376	CL2007.Contig1_All	116 748 minus strand predicted protein [Populus trichocarpa] >gi|118481435|gb|ABK92660.1| unknown [Populus trichocarpa] >gi|222868094|gb|EEF05225.1| predicted protein [Populus trichocarpa]	24448	LYPIIPLLLLFINCTLTSAQSPAAAPAPPGPTNVTAILEKAGQFTTFIRLLQNTKVADQINTQLNNSNQGLTIFAPTDSSFSNLQPGMLNSFTDQQKVELMQFHVLPSFFSPSQFQTVSNPMRTQAGGSQGSFPLNVTATGNQVNITTGVTNATVANTIYTDNQLAVYQVDQVLLPLSFFTTPAPAPAPSKPKKAARSPSGSDVGTTASSA	24|-	4.3|-	2|-	1|-	1|-	1|-	1|-	---	-	-	-	-	-	---	-	-	-	-	-	---	-	-	-	-	-	---	-	-	-	-	-	CL2007.Contig1_All	76.62	6e-52	gi|224140183|ref|XP_002323464.1|	predicted protein [Populus trichocarpa] >gi|118481435|gb|ABK92660.1| unknown [Populus trichocarpa] >gi|222868094|gb|EEF05225.1| predicted protein [Populus trichocarpa]	70.59	2e-48	sp|Q8LEJ6|FLA11_ARATH	Fasciclin-like arabinogalactan protein 11 OS=Arabidopsis thaliana GN=FLA11 PE=2 SV=2	76.62	5e-51	Q6J193	Q6J193_POPCN Fasciclin-like AGP 11 OS=Populus canescens GN=FLA11 PE=2 SV=1	all5264
377	CL1243.Contig12_All	924 1448 minus strand PREDICTED: transaldolase isoform 1 [Vitis vinifera] >gi|296085535|emb|CBI29267.3| unnamed protein product [Vitis vinifera]	22941	VRCSQVDGNGSSVKKTTLHDLYEKEGQSPWYDNLCRPVTDLIPLIESGVRGVTSNPAIFQKAISTSSAYNDQFRELVQSGKDIESAYWELVVKDIQDACKLFEPIYDQTDGGDGYVSVEVSPRLADDTENTIEAAKWLHQWVDRPNVYIKIPATAACIPSIKEVIARGISVNVTV	-|31	-|6.3	-|6	-|1	-|1	-|1	-|1	-	---	-	1	-	-	-	---	-	1	-	-	-	---	-	1	-	-	-	---	-	1	-	-	CL1243.Contig12_All	91.19	5e-83	gi|224157838|ref|XP_002337901.1|	predicted protein [Populus trichocarpa] >gi|222869989|gb|EEF07120.1| predicted protein [Populus trichocarpa]	95.83	6e-06	sp|P86071|TALDO_CAPAA	Transaldolase (Fragments) OS=Capsicum annuum var. annuum PE=1 SV=1	91.19	4e-82	B9PA77	B9PA77_POPTR Predicted protein (Fragment) OS=Populus trichocarpa GN=POPTRDRAFT_948040 PE=3 SV=1	MT1495
378	Unigene2083_All	225 1001 minus strand PREDICTED: uncharacterized protein LOC100267182 [Vitis vinifera]	31462	MGVSGVLQPPPVAVSSLFCHRCPSLPLSYVPFSSNIGGRRHENGRISGLVFVNREDTPSTSASASISTPPPTEEQTEQGDDPDPQDLEYVSQIKTVLELLRKNRDMLFSEVKLTIMIEDPRDVERRRLLGIDDENAPTRDDLAAALVQVNEGQIPRDRLTLQMLAEEMLQWPNLEVEAPKQKQPGKSLYAKFTDTGIDPQEAAKRLNIDWDSAAEIEDAETDDVEVPPAVGYGALYLVTAFPVIIGISVVLILFYNSLQ	86|33	14.3|4.6	-|-	5|1	5|1	3|1	3|1	0.991	---	3	1	-	-	1.527	---	4	1	-	-	1.345	---	3	1	-	-	2.309	---	4	1	*	-	Unigene2083_All	81.32	8e-36	gi|311223468|gb|ADP76805.1|	Y3IP1 [Nicotiana tabacum]	-	-	-	-	81.32	8e-35	E5KCJ9	E5KCJ9_TOBAC Y3IP1 (Fragment) OS=Nicotiana tabacum PE=2 SV=1	-
379	Unigene6252_All	127 747 minus strand predicted protein [Populus trichocarpa] >gi|222834090|gb|EEE72567.1| predicted protein [Populus trichocarpa]	32112	MVKHNNVVPSGHFRKHWQNYVKTWHNQPARKTRRRIARQKKAVKIFPRPTAGPLRPIVHGQTLKYNMKVRAGRGFSLEELKVAGIPKKFAPTIGISVDHRRRNHSLEGFQTNVQRLKTYKAKLVVFPRRARKFKAGDSTPEELATATQVAGPYLPIVREKPTVELVKVTEELKSFKAYDKLRLERTNERHVGVRAKRAAEAEKEEKK	31|110	6.8|15.5	2|-	2|3	2|3	2|2	2|2	---	---	1	1	-	-	---	---	1	-	-	-	---	---	1	1	-	-	---	---	1	-	-	-	Unigene6252_All	90.16	5e-98	gi|224139102|ref|XP_002326768.1|	predicted protein [Populus trichocarpa] >gi|222834090|gb|EEE72567.1| predicted protein [Populus trichocarpa]	84.29	4e-94	sp|P41127|RL131_ARATH	60S ribosomal protein L13-1 OS=Arabidopsis thaliana GN=RPL13B PE=1 SV=1	90.16	4e-97	B9MUD1	B9MUD1_POPTR 60S ribosomal protein L13 OS=Populus trichocarpa GN=POPTRDRAFT_917214 PE=3 SV=1	SPAC664.05
380	CL5821.Contig7_All	421 2178 minus strand beta-galactosidase, putative [Ricinus communis] >gi|223530194|gb|EEF32103.1| beta-galactosidase, putative [Ricinus communis]	76510	LFLFLALTTPFCFGANVTYDHRALVVDGKRRVLVSGSIHYPRSTPDMWPDLIQKSKDGGLDVIETYVFWNLHEPVRGQYDFEGIKDLVKFVKLVKEAGLFVHLRIGPYVCAEWNYGGFPLWLHFIPGIVLRTDNEPFKAEMKRFTAKIVDMMKQEKLFASQGGPIILSQIENEYGNIDSAYGNSAKTYINWAAAMATSLDTGVPWVMCQQSDAPNPIINTCNGFYCDQFTPNSNNKPKMWTENWSGWFSSFGDPVPYRPVEDLAFSVARFYQLGGTFQNYYMYHGGTNFGRTSGGPFITTSYDYDAPIDEYGLLRQPKWGHLKDVHKAIKLCEEAMVATDPKTTSLGSNLEATVYKTESGKCAAFLANVGTQSDATVNFNGNSYNLPAWSVSILPDCKS…	33|21	2.2|2.2	-|-	1|1	1|1	1|1	1|1	---	---	1	-	-	-	---	---	-	-	-	-	---	---	1	-	-	-	---	---	-	-	-	-	CL5821.Contig7_All	81.57	0	gi|255578884|ref|XP_002530296.1|	beta-galactosidase, putative [Ricinus communis] >gi|223530194|gb|EEF32103.1| beta-galactosidase, putative [Ricinus communis]	76.96	0	sp|Q9SCV4|BGAL8_ARATH	Beta-galactosidase 8 OS=Arabidopsis thaliana GN=BGAL8 PE=2 SV=2	81.57	0	B9SWC7	B9SWC7_RICCO Beta-galactosidase OS=Ricinus communis GN=RCOM_0155170 PE=3 SV=1	XF0840
381	CL1228.Contig1_All	679 1308 minus strand dc50, putative [Ricinus communis] >gi|223536978|gb|EEF38615.1| dc50, putative [Ricinus communis]	26568	MSDDVEYRCFIGGLSWSTSDRGLKEAFEKFGHLLEAKVVIDKVSGRSRGFGFVTFDEKQAMEEAIEAMNGIDLDGRTITVDKAQPQQGSGRDYDNDRSRDRDRGRDRDRGREYGSGRGTGGGECFKCGKPGHFARECPSDGAKGGKYGGRDDRYGGSGGGKGGGRYGPDRNGDRFGGRNRDDGGHGGGDRYSRDRAGPYDRRGAGGFRSG	-|40	-|4.8	-|4	-|1	-|1	-|1	-|1	-	---	-	1	-	-	-	---	-	1	-	-	-	---	-	1	-	-	-	---	-	1	-	-	CL1228.Contig1_All	79.02	3e-45	gi|224059014|ref|XP_002299678.1|	predicted protein [Populus trichocarpa] >gi|222846936|gb|EEE84483.1| predicted protein [Populus trichocarpa]	60.24	2e-25	sp|P49310|GRP1_SINAL	Glycine-rich RNA-binding protein GRP1A OS=Sinapis alba PE=2 SV=1	81.61	2e-34	I1KR65	I1KR65_SOYBN Uncharacterized protein OS=Glycine max PE=4 SV=1	all2777
382	CL4727.Contig1_All	392 1972 minus strand beta-hexosaminidase, putative [Ricinus communis] >gi|223545820|gb|EEF47323.1| beta-hexosaminidase, putative [Ricinus communis] >CL4727.Contig3_All 255 1835 beta-hexosaminidase, putative [Ricinus communis] >gi|223545820|g	68580	GLQTISLWYLVYVLVISADAAGIKHLNIWPMPKSVSYGYGNLYLSNDFELKTEGSKFTDASGILKDAFLRSIDVVRAAHVIEVNTSKIDPSLVLKGIHVVVFSPSDELQHGIDESYKLHIPAQGNPLYAHIEAQTVYGALHGLQTFSQVCRYNISSRGILVHQVPLTIVDQPRFSYRGLLIDTSRHYQPLPVIKKVIDSMAYAKLNVLHWHSVDSQSFPLEIPSYPKLWDGAYSISERYTVADAAEIVSYAKKRGINVLAEIDVPGHAQSWGIGYPSLWPSTDCKEPLDVSNEFTFKLIDGILSDFSKIFKYKFVHLGGDEVNTSCWQSTPHVRKWLRKNGLNGSEAYQYFVLRAQKIALSHGYEIINWEETFNNFGSKLSRKTVVHNWLGSGVAQSVV…	86|125	5.3|5.9	-|-	3|8	3|8	2|3	2|3	1.097	1.7	3	6	-	*	---	0.859	-	6	-	-	1.364	0.951	2	6	-	-	---	1.479	1	6	-	*	CL4727.Contig1_All	83.33	2e-28	gi|296085635|emb|CBI29429.3|	unnamed protein product [Vitis vinifera]	68.71	0	sp|Q8L7S6|HEXO3_ARATH	Beta-hexosaminidase 3 OS=Arabidopsis thaliana GN=HEXO3 PE=1 SV=1	83.25	2e-90	F6GYZ3	F6GYZ3_VITVI Putative uncharacterized protein OS=Vitis vinifera GN=VIT_00s0340g00040 PE=4 SV=1	CC0447
383	CL12322.Contig1_All	1 288 minus strand ycf3 gene product (chloroplast) [Silene vulgaris] >gi|374249789|ref|YP_005089418.1| ycf3 gene product (chloroplast) [Silene noctiflora] >gi|374249878|ref|YP_005089506.1| ycf3 gene product (chloroplast) [Silene conica] >gi|3742	12182	PTTSGEKEAFTYYRDGMSAQSEGNYAEALQNYYEAMRLEIDPYDRSYILYNIGLIHTSNGEHTKALEYYFRALERNPFLPQAFNNMAVICHYRGEQ	21|-	8.3|-	-|-	1|-	1|-	1|-	1|-	---	-	-	-	-	-	---	-	-	-	-	-	---	-	-	-	-	-	---	-	-	-	-	-	CL12322.Contig1_All	100	8e-52	gi|91208989|ref|YP_538849.1|	photosystem I assembly protein Ycf3 [Solanum bulbocastanum] >gi|122232537|sp|Q2MII6.1|YCF3_SOLBU RecName: Full=Photosystem I assembly protein ycf3 >gi|84371896|gb|ABC56214.1| photosystem I assembly protein ycf3 [Solanum bulbocastanum]	100	3e-52	sp|P12204|YCF3_TOBAC	Photosystem I assembly protein ycf3 OS=Nicotiana tabacum GN=ycf3 PE=3 SV=1	100	9e-51	H2BLG0	H2BLG0_SILCO Photosystem I assembly protein ycf3 OS=Silene conica GN=ycf3 PE=3 SV=1	-
384	Unigene12515_All	154 1767 PREDICTED: extended synaptotagmin-2 isoform 1 [Vitis vinifera] >gi|302142694|emb|CBI19897.3| unnamed protein product [Vitis vinifera]	77887	MGFLSTILGFCGFGVGISTGMVVGYYLFIYFQPSDVKDPVIHPLVEQDSQSLQRLLPEIPLWVKNPDYDRIDWLNKFLEVMWPYLDKAICKTAKNIATPIIDEQISKFKIESVEFESLTLGSLPPTFQGMKVYLTEEKELIMEPSLKWAGNPNVTVAVRAYGLKATVQVVDLQVFAQPRITLKPLVPSFPCFAKIFVSLMEKPHVDFGLKLAGADLMSIPGLYWFVQELIKDQVANMYLWPKTLEVQILDPTKAMKKPVGILHVKVLRAQKLRKKDLLGASDPYVKLKLTESKAPSKKTTVRHKNLNPEWNEEFSMVVKDPETQALELYVYDWEQVGKHEKMGTNIVPLKELPPDEPKTMTLDLLKNMDPNDVQNDKMRGQIVVELTYKPFKEENLPKD…	-|26	-|1.9	-|-	-|1	-|1	-|1	-|1	-	---	-	-	-	-	-	---	-	-	-	-	-	---	-	-	-	-	-	---	-	-	-	-	Unigene12515_All	90.16	4e-25	gi|255579975|ref|XP_002530822.1|	calcium lipid binding protein, putative [Ricinus communis] >gi|223529614|gb|EEF31562.1| calcium lipid binding protein, putative [Ricinus communis]	75.19	0	sp|Q9SKR2|SYT1_ARATH	Synaptotagmin-1 OS=Arabidopsis thaliana GN=SYT1 PE=1 SV=2	90.16	4e-24	B9SXV3	B9SXV3_RICCO Calcium lipid binding protein, putative OS=Ricinus communis GN=RCOM_0491050 PE=4 SV=1	SPAPYUK71.03c
385	CL11193.Contig1_All	61 993 l-asparaginase, putative [Ricinus communis] >gi|223546213|gb|EEF47715.1| l-asparaginase, putative [Ricinus communis]	37423	MGWAIALHGGAGDIPRSIPPERREPREAALRHCLEIGVDAIKAGRSPLDVVELVVRELEDNPHFNAGKGSVLTSNGTVEMEACIMDGNTKKCGAVSGLTTVKNAISLARLVMEKTPHIYLAFDGAEAFAREQGVETVDPSYFITSENIEKLKEAKEANRVQPKQEVEEEALHQNGDGQTGTVGCVCVDSYGNLAAATSTGGSTNMMVGRIGGTPIIGAGTYANNLCAVSATGKGEAIIRATVAREVAAVVEYKGLSLKEAAAYVIEERLPRFAAGLVAVSATGEVTMPFNTTGMFRACATEDGYNEVGIWP	50|-	3.5|-	1|-	1|-	1|-	1|-	1|-	---	-	1	-	-	-	---	-	-	-	-	-	---	-	1	-	-	-	---	-	-	-	-	-	CL11193.Contig1_All	84.51	6e-29	gi|222625321|gb|EEE59453.1|	hypothetical protein OsJ_11641 [Oryza sativa Japonica Group]	74.68	2e-112	sp|P50287|ASPGA_ARATH	Isoaspartyl peptidase/L-asparaginase 1 OS=Arabidopsis thaliana GN=At5g08100 PE=1 SV=2	80.39	2e-117	A5AVZ2	A5AVZ2_VITVI Putative uncharacterized protein OS=Vitis vinifera GN=VITISV_007448 PE=4 SV=1	STM0847
386	CL369.Contig2_All	156 857 minus strand nucleoside diphosphate kinase 1 [Solanum tuberosum]	30207	MRSQICRSARSFLSAASKHTSRSFSGGRAAAAAAAVSCRGRVSSLASYGLSESGNAYRGWISGALALPAAAFMLQEQEACAAEMERTFIAIKPDGVQRGLISEIISRFERKGFKLVAIKIVIPSKDFAEKHYHDLKERPFFNGLCDFLSSGPVVAMVWEGEGVIKYGRKLIGATDPQKSEPGTIRGDLAVVVGRNIIHGSDGPETAKDEINLWFKPEELVTYISNAEKWIYGVN	52|-	10.3|-	1|-	4|-	4|-	3|-	3|-	1.376	-	3	-	-	-	1.04	-	2	-	-	-	1.254	-	3	-	-	-	0.817	-	2	-	-	-	CL369.Contig2_All	94.81	9e-38	gi|460392973|ref|XP_004242086.1|	PREDICTED: nitrate excretion transporter 1-like [Solanum lycopersicum]	84.97	3e-72	sp|P81766|NDK3_SPIOL	Nucleoside diphosphate kinase 3 OS=Spinacia oleracea PE=1 SV=1	89.63	1e-85	I1HFQ1	I1HFQ1_BRADI Uncharacterized protein OS=Brachypodium distachyon GN=BRADI2G14210 PE=4 SV=1	sll1852
387	CL1452.Contig2_All	424 1857 FtsZ-like protein [Nicotiana tabacum]	55271	MATCISPYFTPPDTRRPIGVLTVLGARVSPLRTVEERNGFLSVSQKCGSNFPQFKCSANSHSVNQFQNKDPFLNLHPEISMLRGETNSTMTNPRQDSSSGNVTESLRDSSSLNNYNDAKIKVIGVGGGGSNAVNRMIESAMKGVEFWIVNTDIQAMRMSPVFPEHRLQIGQELTRGLGAGGNPDIGMSAAKESKESIENAVYGADMVFVTAGMGGGTGTGGAPVIAGVAKSMGILTVGIVTTPFSFEGRRRAVQAQEGIAALRENVDTLIVIPNDKLLTAVSPSTPVTEAFNLADDILRQGVRGISDIITIPGLVNVDFADVRAIMASAGSSLMGIGTATGKTRARDAALNAIQSPLLDIGIERATGIVWNITGGSDLTLFEVNAAAEVIYDLVDPSAN…	318|410	16.7|16.3	-|-	13|14	5|5	5|5	3|3	0.984	1.56	3	5	-	-	1.677	1.394	2	2	-	-	1.051	0.923	3	4	-	-	1.876	---	2	1	-	-	CL1452.Contig2_All	92.71	2e-167	gi|297740108|emb|CBI30290.3|	unnamed protein product [Vitis vinifera]	75.41	0	sp|Q9LXJ0|FTZ22_ARATH	Cell division protein FtsZ homolog 2-2, chloroplastic OS=Arabidopsis thaliana GN=FTSZ2-2 PE=1 SV=1	85.98	0	Q95DV5	Q95DV5_TOBAC FtsZ-like protein OS=Nicotiana tabacum GN=ftsZ PE=2 SV=1	alr3858
388	CL9623.Contig1_All	123 563 EF hand family protein [Solanum demissum] >CL9623.Contig2_All 123 563 EF hand family protein [Solanum demissum]	20205	MGKDLSDDQVSSMKEAFTLFDTDGDGKIAPSELGILMRSLGGNPTQAQLKSIIAEERLNAPFDFPRFLELMSKHLKPEPFDRQLRDAFKVLDKDGTGYVVVSDLRHILTSIGEKLEPAEFDEWIREVDVGSDGKIRYEDFIARMVAK	373|233	40.8|39.5	-|-	15|12	2|4	6|5	2|1	0.714	1.017	2	3	-	-	1.841	1.363	2	3	-	-	0.649	0.641	2	3	*	*	0.832	0.767	2	3	-	-	CL9623.Contig1_All	92.52	2e-75	gi|460378369|ref|XP_004234945.1|	PREDICTED: probable calcium-binding protein CML13-like [Solanum lycopersicum]	89.19	4e-71	sp|Q94AZ4|CML13_ARATH	Probable calcium-binding protein CML13 OS=Arabidopsis thaliana GN=CML13 PE=1 SV=1	92.52	3e-74	Q6L4B1	Q6L4B1_SOLDE EF hand family protein OS=Solanum demissum GN=SDM1_19t00017 PE=4 SV=1	SPAC3A12.14
389	CL558.Contig13_All	390 1589 PREDICTED: fasciclin-like arabinogalactan protein 1-like [Vitis vinifera]	49180	AAAAAAVVLSLFLILLPSTTHAHNITRILAKYPEFSTFNHYLTLTQLAPEINRRETITVCAVDNAGMSDLLSKHLTIGAIKNVLSLHVLLDYFDSKKLHQITDGTALAATMFQATGSAPGSAGFVNITDLKGGKVGFSPQDNGGVVSASFVKSVEAIPYNISVIQISTILPSPEAEAPAPGPSQMNLTSLMSAHGCKIFAETLLANPAEQTFESNVESGLTIFCPGDDAMKSFMPKYKNLSADGKQSLLEYHGMPIYQSRSGLRSSNGLTNSLATDGANKFDFTVQNDGTDVTIKTKIVTAKIVNTLVDEQPLAIYELDKVLMPVELFKSALPPTPAPAPAPEADAESPKSSKKHNSPPAPAAPSDSPADAPNGDVADQTANSNGAARFNGGRFGAVVLS	229|361	10.5|10.5	1|1	8|12	8|12	3|3	3|3	1.724	2.1	6	10	*	*	0.732	1.326	6	9	-	-	0.714	0.56	7	11	-	*	0.884	1.423	6	10	-	*	CL558.Contig13_All	77.42	7e-130	gi|460397005|ref|XP_004244059.1|	PREDICTED: fasciclin-like arabinogalactan protein 1-like [Solanum lycopersicum]	66.35	2e-117	sp|Q9FM65|FLA1_ARATH	Fasciclin-like arabinogalactan protein 1 OS=Arabidopsis thaliana GN=FLA1 PE=1 SV=1	75.48	5e-121	F6I557	F6I557_VITVI Putative uncharacterized protein OS=Vitis vinifera GN=VIT_19s0015g00530 PE=4 SV=1	-
390	CL6321.Contig1_All	83 562 pathogenesis-related protein [Rehmannia glutinosa]	22606	MAITKYTQEIKLRVPAKRMFKALVTETYTMLPKIIPNAIKSIEILQGDGGAGTIRQTNFADDTPYTYVKHRIDALDTENYVSQYTLIEGPVLGDKIESISYDQKFEDSSDGGCITKIVSEYHTKGDIQLKEEDIKAGKDQALSFYTLTQEYLLANPDVCA	23|-	7.5|-	3|-	1|-	1|-	1|-	1|-	---	-	-	-	-	-	---	-	-	-	-	-	---	-	-	-	-	-	---	-	-	-	-	-	CL6321.Contig1_All	71.25	1e-59	gi|170280309|gb|ACB12048.1|	pathogenesis-related protein [Rehmannia glutinosa]	48.1	7e-40	sp|O24248|PRU1_PRUAV	Major allergen Pru av 1 OS=Prunus avium GN=PRUA1 PE=1 SV=1	71.25	1e-58	B1Q190	B1Q190_REHGL Pathogenesis-related protein OS=Rehmannia glutinosa GN=PR-10 PE=2 SV=1	-
391	Unigene5214_All	124 420 minus strand Os07g0287400 [Oryza sativa Japonica Group] >gi|113610923|dbj|BAF21301.1| Os07g0287400 [Oryza sativa Japonica Group]	12519	LLVTLVVLAAALCGIAKGNDDDSLCGMSQDELFQCKPAVAAGAATPPPPTAACCAAVTHANLTCFCTFKNSKYLPLFGIDSARAMQLPSKCDPSRSAHC	-|34	-|11.1	-|-	-|1	-|1	-|1	-|1	-	---	-	1	-	-	-	---	-	-	-	-	-	---	-	-	-	-	-	---	-	1	-	-	Unigene5214_All	48	3e-08	gi|115471577|ref|NP_001059387.1|	Os07g0287400 [Oryza sativa Japonica Group] >gi|113610923|dbj|BAF21301.1| Os07g0287400 [Oryza sativa Japonica Group]	-	-	-	-	48	4e-07	I1Q9U4	I1Q9U4_ORYGL Uncharacterized protein OS=Oryza glaberrima PE=4 SV=1	-
392	Unigene18713_All	248 1336 minus strand chloroplast ferredoxin-NADP+ oxidoreductase precursor [Capsicum annuum]	52395	MAAAVSAAVSLPSSKSASLPARTSIISPERINFNKVPLYYRNLSSAGAKVVPIRAQVTTEAPAKAEKVSKKQEEGVVVNKFRPKEPYIGRCLLNTKITGDDAPGETWHMVFSTEGEVPYREGQSIGVIPDGIDKNGKPHKLRLYSIASSALGDFGDSKTVSLCVKRLVYTNDQGEIVKGVCSNFLCDLKPGAEVKITGPVGKEMLMPKDPDATIIMLATGTGIAPFRSFLWKMFFEKHDDYKFNGLAWLFLGVPTSSSLLYKEEFEKMKEKTPDNFRLDFAVSREQTNDKGEKMYIQTRMAEYAEELWELLKKDNTYVYMCGLKGMEKGIDDIMVSLAAKDGIDWLDYKKQLKRAEQWNVEVY	1614|1661	37.5|35.5	-|-	59|52	59|52	11|10	11|10	0.878	1.007	41	42	-	-	0.91	0.905	36	35	-	-	1.138	1.285	40	43	*	-	0.827	0.979	37	36	-	-	Unigene18713_All	94.07	8e-134	gi|222424884|dbj|BAH20393.1|	AT5G66190 [Arabidopsis thaliana]	87.61	1e-174	sp|O04977|FENR1_TOBAC	Ferredoxin--NADP reductase, leaf-type isozyme, chloroplastic OS=Nicotiana tabacum GN=PETH PE=2 SV=1	94.07	8e-133	B9DI26	B9DI26_ARATH AT5G66190 protein (Fragment) OS=Arabidopsis thaliana GN=AT5G66190 PE=2 SV=1	slr1643
393	CL9658.Contig1_All	230 3103 minus strand PREDICTED: clathrin interactor EPSIN 2-like [Vitis vinifera]	111612	MKKAFDQTVRDLKREVNKKVLKVPSIEQKVLDATSNEPWGPHGSLLADIAQATRNYHEYQMIMSVIWKRTNDTGKNWRHVYKGLTVLEYLVAHGSERVIDDIREHAYQISTLSDFQYIDSSGKDQGNNVRKKSQSLVVLVNDKERIQEVRQKAAANRDKYRSTPVGGMYRPGSFSSSGGYGDRFDDDRYGNRDDDRNGYGREREWGSRDDDRYGRYGESYGREGDKYSRDYEERYGRDGYRDDDYQGRGQSVDDYQYGSRSRSADRDRNRANEDDGQYSSRGSGAKADDHSQDGSSTGKSLDRKYSGQSFGAPPSYEDAVGATRSPPYSERDGESSLAYAPKASSPTGASPTHTTTAAVPPPAPASPPASASAPASAQSTTQHSNKEVDGFDEFDPRGS…	164|89	3.5|4.0	-|-	7|5	7|5	3|3	3|3	0.597	0.6	6	4	*	*	4.288	1.437	3	3	*	-	1.211	1.093	2	2	-	-	---	0.633	1	3	-	-	CL9658.Contig1_All	93.87	7e-90	gi|199601719|dbj|BAG70978.1|	epsin N-terminal homology (ENTH) domain-containing protein [Musa balbisiana]	86.31	4e-85	sp|Q67YI9|EPN2_ARATH	Clathrin interactor EPSIN 2 OS=Arabidopsis thaliana GN=EPSIN2 PE=1 SV=1	93.87	8e-89	B5RHS9	B5RHS9_MUSBA Epsin N-terminal homology (ENTH) domain-containing protein OS=Musa balbisiana GN=Epsin PE=4 SV=1	-
394	Unigene16135_All	45 593 PREDICTED: subtilisin-like protease [Vitis vinifera]	23510	LCLCVLSFTVPQFMSTFAESDTYIVHMDLSAMPKAFSSHHTWYSTILSSISDRAESSTDSSSSSSKLVYAYTNAINGFSAVLSSSELEAIKNSPAYVSSIKDTTVKVDTTHSYQFLGLNSNNGAWPVSDYGKDVIIGVVDTGVWPESRSFNDDGLSEIPMRWKGECQSGTKFNSSMCNKKLIG	-|58	-|8.7	-|-	-|3	-|3	-|1	-|1	-	---	-	1	-	-	-	---	-	-	-	-	-	---	-	1	-	-	-	---	-	-	-	-	Unigene16135_All	67.03	2e-64	gi|225458649|ref|XP_002282833.1|	PREDICTED: subtilisin-like protease [Vitis vinifera]	42.93	3e-33	sp|O64495|SDD1_ARATH	Subtilisin-like protease SDD1 OS=Arabidopsis thaliana GN=SDD1 PE=2 SV=1	67.03	1e-63	F6H1C4	F6H1C4_VITVI Putative uncharacterized protein OS=Vitis vinifera GN=VIT_18s0001g10350 PE=4 SV=1	-
395	Unigene20148_All	84 1343 minus strand Phosphoserine aminotransferase [Medicago truncatula] >gi|355523185|gb|AET03639.1| Phosphoserine aminotransferase [Medicago truncatula]	56123	TNNPLHHLKPATSISNTTQMAAFPTNLSLTSTCTAHKPVSITCSSTTLQTASADTAATSSSDRVFNFAAGPATLPEKVLLKAQSELYNWHGSGMSVMEMSHRGKEFLSIIQKAESDLRSLLNIPSEYSVLFLQGGATTQFAAVPLNLCKPDDDVDYVITGSWGDKAFKEGAKYCRPKSIWSGKSEKYTKIPSFDTLEQTPGAKYLHICANETIHGVEFKDYPEPGSENELLVADMSSNFCSKPVDVSKFGVIYAGAQKNVGPSGVTIAIIRSDLIGNAQPITPVMLDYKIHADNNSLYNTPPCYGIYMCGLVFEDLIAQGGLSEVEQKNVKKAGVLYDAIDGSKGFYRCPVEKSVRSLMNVPFTLAKPELEAEFVKEAAKEKMVQLKGHRSVGGMRASI…	-|301	-|21.4	-|-	-|13	-|2	-|7	-|1	-	1.291	-	2	-	-	-	1.108	-	2	-	-	-	0.72	-	2	-	*	-	1.014	-	2	-	-	Unigene20148_All	92.11	3e-12	gi|361068381|gb|AEW08502.1|	Pinus taeda anonymous locus CL134Contig1_02 genomic sequence >gi|383171876|gb|AFG69292.1| Pinus taeda anonymous locus CL134Contig1_02 genomic sequence >gi|383171877|gb|AFG69293.1| Pinus taeda anonymous locus CL134Contig1_02 genomic sequence >gi|383171878|gb|AFG69294.1| Pinus taeda anonymous locus CL134Contig1_02 genomic sequence >gi|383171879|gb|AFG69295.1| Pinus taeda anonymous locus CL134Contig…	79.78	1e-159	sp|P52877|SERC_SPIOL	Phosphoserine aminotransferase, chloroplastic OS=Spinacia oleracea PE=2 SV=1	86.22	3e-170	F6I7S4	F6I7S4_VITVI Phosphoserine aminotransferase OS=Vitis vinifera GN=VIT_00s2607g00010 PE=3 SV=1	PA3167
396	CL2493.Contig1_All	214 1779 minus strand PREDICTED: alanine aminotransferase 2 [Vitis vinifera]	66154	SSHSQKSLPHSSAAFLLRFLNTIASPNPSSSSSDSMASDYSSTPVKIDTINPKVLECEYAVRGEIVTLAQKLQEELKDNPDSHPFDEILYCNIGNPQSLGQQPITFFREVLALCDHPAILDKAETQGLFSADSIERAFQILDQIPGRATGAYSHSQGIKGLRDAICAGIEARDGFPADPNDIFLTDGASPAVHMMMQLLIRSKNDGILCPIPQYPLYSASIALHGGTLIPYYLDEATGWGLEISELKNQLEAAKSKGISVRALVVINPGNPTGQVLAENNQPQIVDFCKKEGLVLLADEVYQENIYVPDKQFHSFKKVARSMGYGEKDISLVSFQSVSKGYYGECGKRGGYMEVTGFSPEIREQIYKVASVNLCSNISGQILASLVMNPPKVGDESYES…	78|58	9.8|7.1	-|-	7|3	7|3	4|3	4|3	1.184	0.833	4	3	-	-	1.26	---	3	1	-	-	0.623	0.869	3	3	-	-	1.323	---	3	1	-	-	CL2493.Contig1_All	89.55	6e-98	gi|118483975|gb|ABK93875.1|	unknown [Populus trichocarpa]	84.13	0	sp|Q9LDV4|ALAT2_ARATH	Alanine aminotransferase 2, mitochondrial OS=Arabidopsis thaliana GN=ALAAT2 PE=2 SV=1	88.31	0	B9GXZ6	B9GXZ6_POPTR Predicted protein OS=Populus trichocarpa GN=POPTRDRAFT_1073568 PE=4 SV=1	YLR089c
397	CL4198.Contig3_All	171 1904 PREDICTED: splicing factor 3B subunit 2-like [Glycine max]	88476	AETISQPNGDLKSQNPSGAAKKSRETERRRRRRKQKKNKQNAAAGDESDTAAEEANGIADDSSKENSDPQKALELVEVEYVPEKAELDGVLDEEFRKVFEKFNFMESAVTEESDKKDDAAPDAALKKKDSDSEEEEQDTQQKEKGISNKKKKLQRRMKIAELKQICTRPDVVEVWDATAADPKLLVYLKSYRNTVAVPRHWCQKRKFLQGKRGIEKQPFQLPDFIAATGIEKIRQAYIEKEDSKKLKQKQRERMQPKMGKMDIDYQVLHDAFFKHQTKPKLTTHGDLYYEGKEFEVKLREMKPGMLSQELKEALGMPEGAPPPWLINMQRYGPPPSYPHLKIPGLNAPIPPGAKFGYGHGDWGKPPVDEYGRPLYGDVFGVLQQEQPNYEEEPVDKTKH…	-|22	-|2.1	-|1	-|1	-|1	-|1	-|1	-	---	-	-	-	-	-	---	-	-	-	-	-	---	-	-	-	-	-	---	-	-	-	-	CL4198.Contig3_All	89.31	3e-121	gi|359497327|ref|XP_002270799.2|	PREDICTED: splicing factor 3B subunit 2-like, partial [Vitis vinifera]	54.91	7e-114	sp|Q13435|SF3B2_HUMAN	Splicing factor 3B subunit 2 OS=Homo sapiens GN=SF3B2 PE=1 SV=2	89.11	2e-117	F6HRX8	F6HRX8_VITVI Putative uncharacterized protein OS=Vitis vinifera GN=VIT_00s0818g00010 PE=4 SV=1	SPAC22F8.10c
398	Unigene27615_All	103 972 RNA-binding protein precursor [Nicotiana tabacum]	31206	MAFLNRVGNVLKQTVSKHVTLGFSAPNASLFQAIRSMSSSSKLFVGGLSYSTDEMSLRETFSQYGEVVEARVILDRETGRSRGFGFVTFTSTEAASSAIQAFDGQDLHGRRVRVNYATEKPRGGFGGGYGAGGGYNYGGQGGNYGRGAYQGGSYPGGDGNFSGGGGYGSGNQYPSGGGGYGGGNNYTGGGSGFGGADNYPSGGGSGYGGSDSVQGDGNYSGGGSNYFSGSQPGFSSLLNDETTGPNGETQEPVGGHQGDTEAGNEDFGQDMLDENNRDDNDEPNDYANTR	478|652	19.7|27.9	-|-	11|19	11|19	3|4	3|4	1.938	1.41	10	14	*	*	1.498	0.991	7	10	-	-	0.571	0.816	8	15	*	-	1.413	1.052	7	10	-	-	Unigene27615_All	77.5	3e-48	gi|15822703|gb|AAL07518.1|	RNA-binding protein precursor [Nicotiana tabacum]	70	4e-42	sp|Q9FNR1|RBG3_ARATH	Glycine-rich RNA-binding protein 3, mitochondrial OS=Arabidopsis thaliana GN=RBG3 PE=2 SV=1	77.5	3e-47	Q941H9	Q941H9_TOBAC RNA-binding protein (Precursor) OS=Nicotiana tabacum PE=2 SV=1	TP0356
399	CL9591.Contig1_All	74 706 predicted protein [Populus trichocarpa] >gi|222845172|gb|EEE82719.1| predicted protein [Populus trichocarpa] >CL9591.Contig2_All 82 714 minus strand predicted protein [Populus trichocarpa] >gi|222845172|gb|EEE82719.1| predicted protein	26629	MNSLPFSIGTYNPTNHRTSGLGFLTTKNLPIVESSAVKFNETKYSKTSSALLSRREAVGMGFCFSFLQLLNPQPDPASAESGAAPPCELTAAPSGLAYCDKVIGTGPEAVKGQLIKAHYVGRLEDGKVFDSSYNRGKPLTFRVGVGEVIKGWDVGIVGGDGIPAMLAGGKRKLRIPPALGYGMRGAGCTGGSCIIPPDSVLLFDVEFIGKA	338|383	14.2|14.2	-|-	12|12	12|12	2|2	2|2	0.436	0.593	10	10	-	*	0.532	0.687	6	8	*	-	2.108	1.652	10	10	-	*	0.538	0.719	6	8	*	-	CL9591.Contig1_All	85.53	5e-22	gi|6686802|emb|CAB64723.1|	FKBP like protein [Arabidopsis thaliana]	85	3e-14	sp|P59724|FKBP3_VICFA	FKBP-type peptidyl-prolyl cis-trans isomerase, chloroplastic (Fragment) OS=Vicia faba PE=1 SV=1	71.31	2e-35	F2DBI8	F2DBI8_HORVD Peptidyl-prolyl cis-trans isomerase (Fragment) OS=Hordeum vulgare var. distichum PE=2 SV=1	slr1761
400	CL495.Contig1_All	166 1683 dihydrolipoamide dehydrogenase precursor [Solanum lycopersicum] >gi|23321340|gb|AAN23154.1| dihydrolipoamide dehydrogenase precursor [Solanum lycopersicum]	67292	MAMASIARRKATTLFSSSSKHMCHGTKYSWIVSRGFASGSDENDVIVIGGGPGGYVAAIKAAQLGLKTTCIEKRGTLGGTCLNVGCIPSKALLHSSHMYHEAKHSFASHGVKLASVEVDLPAMMAQKDKAVGNLTKGIEGLFKKNKVNYVKGYGKFLSPSEVSVDTIEGGNTIVKGKNIIIATGSDVKSLPGITIDEERIVSSTGALALKEVPKKLVVIGAGYIGLEMGSVWGRLGSEVTVVEFAADIVPTMDGEVRKQFQRSLEKQKMKFMLKTKVLSVDTTGNGVKLTLEPAAGGEQTTLEADVVLVSAGRIPFTAGLQLEKIGVETDKAGRILVNERFATSVPGVYAIGDVIPGPMLAHKAEEDGVACVEYIAGKEGHVDYDLVPGVVYTHPEVAS…	1401|1305	25.9|28.9	1|1	43|37	13|11	10|10	4|5	1.486	1.712	9	8	-	*	0.893	1.139	8	8	-	-	0.791	0.761	9	9	*	-	2.062	1.452	8	9	*	*	CL495.Contig1_All	93.55	3e-44	gi|297736770|emb|CBI25971.3|	unnamed protein product [Vitis vinifera]	84.62	0	sp|Q9M5K3|DLDH1_ARATH	Dihydrolipoyl dehydrogenase 1, mitochondrial OS=Arabidopsis thaliana GN=LPD1 PE=1 SV=2	89.72	0	Q8GT30	Q8GT30_SOLLC Dihydrolipoyl dehydrogenase OS=Solanum lycopersicum PE=2 SV=1	SPAC1002.09c
401	CL465.Contig1_All	448 2370 minus strand poly(A)-binding protein [Nicotiana tabacum]	81344	QVQMQPQVQMVNAAASGGAPFVTSLYVGDLDTNVTDSQLYDLFSQMGDVVSVRVCRDLTSRRSLGYGYVNYGNPQDAERALEELNFTPLSGKPIRIMYSHRDPSVRRSGAGNIYIKNLDKEIDHKALHETFSSFGNILSCKVAVDASGQSMGYGFVQFVSEESAQKAIEKLNGMLLNEKQVYVGPFLRKQEREMSVDKAKFTNVFVKNLSELVTEDDLKKIFGEFGLITSTVVMRNEDGTSKCFGFVNFENAEDAARAVESLDGQKFDNKEWYVGRAQKKSERELELKHRFEQSVKEAVDKSQGSNLYVKNLDDGIGDEKLKELFSPFGSITSCKVMRDPKGISRGSGFVAFSSPEEASKALSEMNGKIIVSKPLYVALAQRKEDRRAQLQAQFAQMRP…	-|29	-|6.4	-|2	-|2	-|2	-|2	-|2	-	---	-	1	-	-	-	---	-	1	-	-	-	---	-	1	-	-	-	---	-	1	-	-	CL465.Contig1_All	83.33	8e-32	gi|297791101|ref|XP_002863435.1|	predicted protein [Arabidopsis lyrata subsp. lyrata] >gi|297309270|gb|EFH39694.1| predicted protein [Arabidopsis lyrata subsp. lyrata]	74.12	0	sp|P42731|PABP2_ARATH	Polyadenylate-binding protein 2 OS=Arabidopsis thaliana GN=PAB2 PE=1 SV=1	82.13	0	Q9M6E6	Q9M6E6_TOBAC Poly(A)-binding protein OS=Nicotiana tabacum GN=PABP PE=2 SV=1	SPAC1610.03c
402	CL13261.Contig1_All	264 1193 RecName: Full=Spermidine synthase; Short=SPDSY; AltName: Full=Putrescine aminopropyltransferase >gi|3242659|dbj|BAA29033.1| spermidine synthase [Coffea arabica]	39390	NNGGASAVELPEGISSVIPGWFSEISPMWPGEAHSLKVEKIIFQGKSDYQNVMVFQSSTYGKVLVLDGVIQLTERDECAYQEMITHLPLCSIPNPKKVLVIGGGDGGVLREVSRHSSVEKIDICEIDKMVVDVSKQFFPSVAVGFDDPRVTLHIGDGVAFLKAVPEGTYDAIIVDSSDPIGPAQELFEKPFFESVSKALRPGGVVCTQAESIWLHMHIIEDIVANCRQIFKGSVNYAWTTVPTYPSGVIGFMLCATEGPPVDFRHPINPIDADDSLVKTRGPLRFYNSEIHSAAFCLPSFARKVIESKAN	204|132	8.4|4.2	-|1	5|4	5|4	2|1	2|1	1.944	1.065	4	4	-	-	1.402	1.795	3	4	-	-	0.634	0.848	4	4	-	-	1.303	1.584	3	4	-	-	CL13261.Contig1_All	98.8	7e-36	gi|380863014|gb|AFF18800.1|	spermidine synthase, partial [Dimocarpus longan]	90.32	2e-162	sp|O82147|SPDE_COFAR	Spermidine synthase OS=Coffea arabica PE=2 SV=1	89.95	6e-104	G8FQI8	G8FQI8_TOBAC Spermidine synthase (Fragment) OS=Nicotiana tabacum PE=2 SV=1	SPBC12C2.07c
403	CL8417.Contig3_All	700 1275 minus strand branched-chain aminotransferase [Nicotiana benthamiana]	24774	FLIYVSPVGNYFKEGLAPINLIVETELHRATPGGTGGVKTIGNYAPVLKAQSAAKAKGYSDVLYLDSIHKRYLEEVSSCNVFVVKGNVISTPAIKGTILPGITRKSILDVALNQGFKVEECLVTVDDLLDADEVFCTGTAVVVSPVGSITYLNKRVTYGSDGVGRVSQQLYSALTRLQMGLTEDKMGWIVEL	25|-	6.2|-	-|-	1|-	1|-	1|-	1|-	---	-	-	-	-	-	---	-	-	-	-	-	---	-	-	-	-	-	---	-	-	-	-	-	CL8417.Contig3_All	87.5	3e-87	gi|158635126|gb|ABW76425.1|	branched-chain aminotransferase [Nicotiana benthamiana]	80.21	1e-87	sp|Q9FYA6|BCAT5_ARATH	Branched-chain-amino-acid aminotransferase 5, chloroplastic OS=Arabidopsis thaliana GN=BCAT5 PE=1 SV=1	89.74	5e-75	I1LH36	I1LH36_SOYBN Uncharacterized protein OS=Glycine max PE=4 SV=1	BS_ywaA
404	Unigene34712_All	105 773 PREDICTED: glutathione S-transferase PARB [Vitis vinifera] >gi|147780605|emb|CAN69111.1| hypothetical protein VITISV_031837 [Vitis vinifera] >gi|302141701|emb|CBI18904.3| unnamed protein product [Vitis vinifera]	30364	MAASVKVYGPPLSTAVSRVLACLLEKDVPFQLLPVNMAKGEHKKPDYLKIQPFGQVPAFQDESITLFESRAISRYVCDKYANQGNQGLYGANPLGKASIDQWLEAEGQNFNPPSSVLVFQLAFAPRMKIKQDENLIKQNEAKLAKVLDVYDQRLGESRYLAGDDFTLADLSHLPNTQYLVNATDRGDLFMSRKNVERWWGEISSRESWKKVVEMQNSPPPRSA	70|118	18.8|15.2	-|-	4|2	4|2	3|2	3|2	---	1.871	1	2	-	-	---	2.472	1	2	-	-	---	---	1	1	-	-	---	---	1	1	-	-	Unigene34712_All	82.27	3e-107	gi|460415578|ref|XP_004253135.1|	PREDICTED: glutathione S-transferase-like [Solanum lycopersicum]	48.1	7e-52	sp|Q96324|GSTFB_ARATH	Glutathione S-transferase F11 OS=Arabidopsis thaliana GN=GSTF11 PE=2 SV=1	81.57	4e-104	B9R8H1	B9R8H1_RICCO Glutathione-s-transferase theta, gst, putative OS=Ricinus communis GN=RCOM_1599790 PE=3 SV=1	STM0862
405	CL11506.Contig1_All	104 556 minus strand cytoplasmic ribosomal protein S13 [Panax ginseng] >CL11506.Contig4_All 40 492 minus strand cytoplasmic ribosomal protein S13 [Panax ginseng]	23557	MGRMHSRGKGISASALPYKRTPPSWLKITSQDVEDNICKFAKKGLTPSQIGVILRDSHGIAQVKSVTGSKILRILKAHGLAPEIPEDLYHLIKKAVAIRKHLERNRKDKDSKFRLILVESRIHRLARYYKKTKKLPPVWKYESTTASTLVA	111|54	23.8|19.2	1|1	8|3	2|1	4|3	1|1	0.649	---	2	1	-	-	---	---	1	1	-	-	0.756	---	2	1	*	-	---	---	1	1	-	-	CL11506.Contig1_All	98.68	1e-81	gi|8131699|dbj|BAA96366.1|	cytoplasmic ribosomal protein S13 [Panax ginseng]	96.69	3e-81	sp|P62302|RS13_SOYBN	40S ribosomal protein S13 OS=Glycine max GN=RPS13 PE=2 SV=1	98.68	2e-80	Q9MAV9	Q9MAV9_PANGI Cytoplasmic ribosomal protein S13 OS=Panax ginseng PE=2 SV=1	SPAC6F6.07c
406	Unigene5148_All	197 460 minus strand PREDICTED: uncharacterized protein LOC100499787 [Glycine max]	11302	ASRWIRPEVYPLFAAMGVAVGICGFQLVRNICINPEVRVNKEGRAAGVLENFAEGQKYSEHALRKFVRNRRPEIMPSINSFFADPQQN	95|81	14.8|14.8	-|-	3|2	3|2	1|1	1|1	0.954	1.35	2	2	-	-	1.329	0.599	2	2	-	-	0.683	0.682	2	2	-	-	0.845	0.543	2	2	-	-	Unigene5148_All	85.23	1e-38	gi|356508630|ref|XP_003523058.1|	PREDICTED: uncharacterized protein LOC100500534 [Glycine max]	-	-	-	-	85.06	4e-38	D7SHY6	D7SHY6_VITVI Putative uncharacterized protein OS=Vitis vinifera GN=VIT_17s0000g07610 PE=4 SV=1	-
407	CL10379.Contig1_All	97 2355 minus strand PREDICTED: pumilio homolog 23-like [Vitis vinifera]	104779	KKRKMGRKGSKRHAGFHGDASIQNQSGSLPGANGKAQKFAKDKTASVSQASFVRKQVDPETAKYFSEIANVIEGTEVDLEERSVICGNALEEARGKEIELATDYIISHTMQTLLDGCSVDHLCAFLQSCAKRFSHVSMDRSGSHVAETALKSLARHLADDENLSLIEETLSALCQAIVVNPVDIMCNCYGSHVLRRLLCLCKGVPIDSVEFHSTKPSVVLAERLNLRSSQLDGHESQQNQPFPDQLKFLISEMLNPLRADMAILQVNQYSSLVLQTALKLLAGQEEELLRLIPVLLGCRTDNALEGNFIEVRAVKKVLHLVEENAFSHLMEVILAVAPDSLYNEIFAKGFKDSLFRMSSHPSGNFVVQALVSHARSQEHIKLIFEELGSKFRNLLEMGR…	30|-	0.9|-	5|-	3|-	3|-	1|-	1|-	---	-	-	-	-	-	---	-	-	-	-	-	---	-	-	-	-	-	---	-	-	-	-	-	CL10379.Contig1_All	64.38	0	gi|460379551|ref|XP_004235525.1|	PREDICTED: pumilio homolog 23-like isoform 2 [Solanum lycopersicum]	57.01	0	sp|Q9C552|PUM23_ARATH	Pumilio homolog 23 OS=Arabidopsis thaliana GN=APUM23 PE=2 SV=1	63.1	0	D7TZJ6	D7TZJ6_VITVI Putative uncharacterized protein OS=Vitis vinifera GN=VIT_09s0002g00300 PE=4 SV=1	-
408	CL6627.Contig1_All	148 1188 minus strand putative mitochondrial NAD-dependent malate dehydrogenase [Solanum tuberosum]	44450	MKAAMLRSVIRRSTSSSSATTTPSYLSSRGFSSESAPERKVAILGAAGGIGQPLSLLMKLNPLVSRLALYDIAGTPGVAADVSHINTRSEVKGYAAEEQLGQALEGSDVVIIPAGVPRKPGMTRDDLFKINAGIVKSLCEAIAKYCPNALVNMISNPVNSTVPIAAEVFKSKGVYDERKLFGVTTLDVVRAKTFYAGKAKVNVADVNVPVIGGHAGITILPLFSQATPKANLSDEEIKALTKRTQDGGTEVVEAKAGKGSATLSMAYAGALFADACLKGLNGVPDVVECSFVQSTVTELPFFASKVRLGKNGVEEVLGLGLLSDYEQQGLEALKPELKSSIEKGVAF	1656|1960	22.8|31.1	1|-	37|38	6|9	5|6	1|2	1.408	1.222	4	9	-	-	1.166	0.987	4	8	-	-	1.486	1.563	4	8	*	*	1.959	1.753	4	8	-	*	CL6627.Contig1_All	90.43	1e-106	gi|48375044|gb|AAT42189.1|	putative mitochondrial malate dehydrogenase [Nicotiana tabacum]	88.33	9e-158	sp|P17783|MDHM_CITLA	Malate dehydrogenase, mitochondrial OS=Citrullus lanatus GN=MMDH PE=1 SV=1	90.43	1e-105	Q5DNZ8	Q5DNZ8_TOBAC Malate dehydrogenase (Fragment) OS=Nicotiana tabacum PE=2 SV=1	VC0432
409	CL5347.Contig1_All	94 696 Why2 protein [Solanum tuberosum]	27071	MLKLSRLLLYSSRDLLSRKNLVSGATSDFKLFRGITTQTGMSTAMPNFGLDGKSAAKIFAPYSIYKGKAALSADPLLPMFSKLESGDYRVERRGVIMLTFWPAIGERKYDWDKRQKFALSATEVGSLISLGSKDSCEFFHDPSMLSSNAGQVRKSLSLKAHADGSGYFISLSVVNNILKTNDRFVVPVTTAEFAVMRTAFT	25|54	7.0|13.9	2|2	1|2	1|2	1|2	1|2	---	---	-	1	-	-	---	---	-	1	-	-	---	---	-	1	-	-	---	---	-	1	-	-	CL5347.Contig1_All	79.02	3e-63	gi|224070977|ref|XP_002303313.1|	predicted protein [Populus trichocarpa] >gi|222840745|gb|EEE78292.1| predicted protein [Populus trichocarpa]	73.96	1e-68	sp|D9J034|WHY2_SOLTU	Single-stranded DNA-bindig protein WHY2, mitochondrial OS=Solanum tuberosum GN=WHY2 PE=1 SV=1	79.02	3e-62	B9GXF0	B9GXF0_POPTR Predicted protein (Fragment) OS=Populus trichocarpa GN=POPTRDRAFT_414440 PE=4 SV=1	-
410	CL12692.Contig2_All	244 2619 minus strand hypothetical protein VITISV_013807 [Vitis vinifera]	101969	MQADQTVLSLRPGGGTRGGSRVSGPRFDSSAAANPDLTLLRPHGGTAASSLPSFKTGESRFEGHERVRYTRDQMLQLREVVSIPEDILKVKQEVEAEFFGIDPSWSHGESNLPNQGQSRYSELDNRDWRNRSAQLPAPAEERSWEAIRDRDFGVKFDPRQQDANQYNKQDQMNSQFARAQFASNQGVAPTLIKAEVPWSARRGNLSEKELVLKTVKGILNKLTPEKFDLLKGQLIDSGITTADILKGVISLIFDKAVLEPTFCPMYALLCSDLNEKLPPFPSDEPGGKEITFKRLLLNNCQEAFEGAGKLREEVRQMTAPEQELEKRDKERLIKLRTLGNIRLIGELLKQRMVPEKIVHHIVQELLGHDTNSCPAEENVEAICQFFNTIGKQLDENRKS…	60|-	4.9|-	1|-	4|-	4|-	4|-	4|-	---	-	1	-	-	-	---	-	1	-	-	-	---	-	1	-	-	-	---	-	1	-	-	-	CL12692.Contig2_All	90.26	2e-75	gi|189313740|gb|ACD88869.1|	translation initiation factor eIF(iso)4G [Prunus persica]	64.03	0	sp|Q93ZT6|IF4G1_ARATH	Eukaryotic translation initiation factor isoform 4G-1 OS=Arabidopsis thaliana GN=EIF(ISO)4G1 PE=1 SV=1	90.26	3e-74	C1IE05	C1IE05_PRUPE Translation initiation factor eIF(Iso)4G (Fragment) OS=Prunus persica PE=2 SV=1	-
411	CL703.Contig5_All	122 1078 RecName: Full=Triosephosphate isomerase, chloroplastic; Short=TIM; Short=Triose-phosphate isomerase; Flags: Precursor >gi|806312|gb|AAA66289.1| triosephosphate isomerase, chloroplast isozyme [Spinacia oleracea]	41754	MAVVSTSLGGGAVTSQLTQFSGLRKSFFKLDTSNFNSTQSFFQNVNSHLRLVSSNKGCRGVVTMAGSGKFFVGGNWKCNGTKDSISKLVSDLNSATLESDVDVVVAPPFVYIDQVKNLLSDRMEIAAQNCWTGKGGAFTGEISVEQLKDLGCKWVVLGHSERRHIIGEDDQFIGKKAAYALSQGVGVIACIGELLEEREAGKTFDVCFQQMKAYADAVPSWDNIVVAYEPVWAIGTGKVATPEQAQEVHLAVRDWLSKKVSAEVASKTRIIYGGSVNGGNCAELAKQEDIDGFLVGGASLKGPEFATIINSVTSKKVAA	699|483	24.5|21.9	-|-	26|21	25|21	6|5	5|5	1.09	0.826	21	18	-	-	0.757	0.787	20	16	-	-	1.478	1.577	19	17	*	*	0.923	0.763	20	17	-	-	CL703.Contig5_All	89.06	1e-134	gi|297744661|emb|CBI37923.3|	unnamed protein product [Vitis vinifera]	81.85	1e-126	sp|P46225|TPIC_SECCE	Triosephosphate isomerase, chloroplastic OS=Secale cereale PE=1 SV=1	88.67	9e-134	B9H150	B9H150_POPTR Triosephosphate isomerase OS=Populus trichocarpa GN=POPTRDRAFT_713199 PE=3 SV=1	YDR050c
412	CL6378.Contig1_All	190 1827 minus strand chaperonin containing t-complex protein 1, alpha subunit, tcpa, putative [Ricinus communis] >gi|223536098|gb|EEF37754.1| chaperonin containing t-complex protein 1, alpha subunit, tcpa, putative [Ricinus communis]	72303	MAINVQTPDISGERQSGQDVRTQNVMACQAVANIVKSSLGPVGLDKMLVDDIGDVTITNDGATILKMLEVEHPAAKVLVELAELQDREVGDGTTSVVIIAAELLKRANDLVRNKIHPTSIISGYRLAMREACKYVDEKLAVKVEKLGKDSIVNCAKTSMSSKLIAGDNDFFANLVAEAVQAVKMTNARGEVKYPIKGINILKAHGKSARDSYLLRGYALNTGRAAQGMPLRVAPARIACLDFNLQKTKMQMGVQVLVTDPRELEKIRQREVDMTKERIEKLLKAGANVILTTKGIDDMALKYFVEAGAIAVRRVRKEDLRHVAKATGATAVSTFADMEGEETFDSSFLGYADEVVEERIADDDVIMIKGTKTTSAVSLILRGANDFMLDEMDRALHDAL…	106|213	5.3|11.0	1|-	3|9	3|9	2|5	2|5	0.004	0.795	2	6	-	-	---	0.851	1	4	-	-	10.287	1.504	2	6	-	-	---	0.883	1	4	-	-	CL6378.Contig1_All	93.77	0	gi|255567297|ref|XP_002524629.1|	chaperonin containing t-complex protein 1, alpha subunit, tcpa, putative [Ricinus communis] >gi|223536098|gb|EEF37754.1| chaperonin containing t-complex protein 1, alpha subunit, tcpa, putative [Ricinus communis]	89.72	0	sp|P28769|TCPA_ARATH	T-complex protein 1 subunit alpha OS=Arabidopsis thaliana GN=CCT1 PE=2 SV=1	93.77	0	D7SLU3	D7SLU3_VITVI T-complex protein 1 subunit alpha OS=Vitis vinifera GN=VIT_15s0021g02230 PE=3 SV=1	SPBC12D12.03
413	CL6434.Contig1_All	162 578 minus strand unnamed protein product [Vitis vinifera]	20061	SHCCSLRWKMVRVSVLNDALKSMYNAEKRGKRQVMIRPSSKVIIKFLLVMQKHGYIGEFEYVDDHRSGKIVVELNGRLNKCGVISPRFDIGVKEIEPWTARLLPSRQFGYIVLTTSAGIMDHEEARRKNVGGKVLGFFY	148|100	16.5|10.8	2|2	11|6	11|6	3|2	3|2	2.039	2.626	8	4	*	*	1.331	1.409	8	4	-	-	0.909	1.164	8	3	-	-	2.501	2.865	8	4	*	*	CL6434.Contig1_All	100	1e-10	gi|357444363|ref|XP_003592459.1|	40S ribosomal protein S15a, partial [Medicago truncatula] >gi|355481507|gb|AES62710.1| 40S ribosomal protein S15a, partial [Medicago truncatula]	96.92	2e-70	sp|Q9AT34|RS15A_DAUCA	40S ribosomal protein S15a OS=Daucus carota GN=RPS15A PE=2 SV=3	98.46	2e-68	B9SR47	B9SR47_RICCO 30S ribosomal protein S8, putative OS=Ricinus communis GN=RCOM_0465830 PE=3 SV=1	YJL190c
414	CL11279.Contig1_All	114 695 minus strand alpha chain of nascent polypeptide associated complex [Nicotiana benthamiana]	27061	QSQEELLAAHLEQQKIDHEEPLVEDEDDDDEDDEGDEDDAEGQEDASGRSKQSRSEKKSRKAMLKLGMKPIPGVSRVTVKKSKNILFVISKPDVFKSPNSDTYVVFGEAKIEDLSSQLQTQAAEQFKAPNVSNVVPKAEPTTLPQDDEDVDETGVEPKDIELVMTQAGVSRARAVKALKDADGDIVSAIMELTN	1570|991	40.2|57.7	-|-	46|36	5|4	5|6	1|1	1.035	1.268	5	3	-	-	0.477	0.571	5	3	-	-	0.893	0.972	5	3	-	-	0.448	0.653	5	3	*	-	CL11279.Contig1_All	95.12	9e-09	gi|1658271|gb|AAB18266.1|	nascent polypeptide associated complex alpha chain [Nicotiana tabacum]	76.53	2e-49	sp|Q6ICZ8|NACA3_ARATH	Nascent polypeptide-associated complex subunit alpha-like protein 3 OS=Arabidopsis thaliana GN=At5g13850 PE=1 SV=1	85.71	5e-55	B9GXB0	B9GXB0_POPTR Predicted protein (Fragment) OS=Populus trichocarpa GN=POPTRDRAFT_414863 PE=4 SV=1	SPBC25H2.05
415	Unigene16682_All	192 1688 PREDICTED: glutathione synthetase, chloroplastic-like [Vitis vinifera]	65461	SMAQNASLAVSPLKCSGRGTEEAETQKPMFDPHSIDPNLLQKMGYDALVWSSLHGLLVGNRASQKSGRVPGVGLIHAPISLLPMPFPESHWKQACEVAPIFNELVDRVSLDTKFLQESLSRTKKVDAFTSRLLDIHAKMLDLNKKEEIRLGLHRSDYMLDEQTSLLLQVELNTISSSFPGLSCLVSELHRSLLHQFKQHLALDPERIPQNYAVSQFAEALYKAWAEYNNPRAVVMVVVQTEEWNMYDQHWLLTVLKERYQVRSIRKTLAEIDAQGELLPDGTLVVDGEAVAVVYFRAGYAPTDYPSESEWSARLLIEQSCAIKCPSIAYHLAGTKKIQQELAKPNQLERFLENKDDIAKVRKCFAGLWSLDDLSIVKDAIERPGLYVMKPQREGGGNNI…	-|47	-|2.4	-|1	-|1	-|1	-|1	-|1	-	---	-	1	-	-	-	---	-	1	-	-	-	---	-	1	-	-	-	---	-	1	-	-	Unigene16682_All	78.57	7e-39	gi|15865449|emb|CAC82726.1|	glutathione synthetase [Mesembryanthemum crystallinum]	74.8	0	sp|O22494|GSHB_SOLLC	Glutathione synthetase, chloroplastic OS=Solanum lycopersicum GN=GSH2 PE=2 SV=1	76.05	0	D7TV25	D7TV25_VITVI Putative uncharacterized protein OS=Vitis vinifera GN=VIT_14s0030g00030 PE=4 SV=1	-
416	CL9259.Contig1_All	104 781 minus strand RecName: Full=DAG protein, chloroplastic; Flags: Precursor >gi|1200205|emb|CAA65064.1| DAG [Antirrhinum majus]	31078	MATLNLSILPKTLTPTPKTLKPRLSFPSSSSLSFLLCAPPHPTKSRSAAFPAVRALTDGEYSAKRNRSSEERETIMLPGCDYNHWLIVMEFPKDPAPTREQMIDTYLNTLATVLGSMEEAKKNMYAFSTTTYTGFQCTVSEETSEKFKGLPGVLWVLPDSYIDVKNKDYGGDKYINGEIIPCQYPTYQPKQSRSSKYKSKAYVRQRDGPPAERRRPRQEAAPESAS	115|225	7.5|7.5	1|1	2|4	2|4	1|1	1|1	0.379	---	2	1	*	-	0.772	---	2	1	-	-	2.102	---	2	1	-	-	0.6	---	2	1	*	-	CL9259.Contig1_All	97.09	3e-55	gi|413917477|gb|AFW57409.1|	hypothetical protein ZEAMMB73_570539 [Zea mays]	85.85	7e-88	sp|Q38732|DAG_ANTMA	DAG protein, chloroplastic OS=Antirrhinum majus GN=DAG PE=2 SV=1	91.43	8e-69	I1QFI5	I1QFI5_ORYGL Uncharacterized protein OS=Oryza glaberrima PE=4 SV=1	-
417	Unigene5180_All	42 554 unknown [Populus trichocarpa]	20811	LENRAVAVLCFIFVWFQLSTGAVYKVGDSAGWTTIGNVDYKQWAVTKTFQLGDIIVFEYNPQFHNVMQVTHAEYRACNVSSPISTHTTGNDSITIKTHGHHFFVCGVPGHCQAGQKVDINVLRAPSLAPSSSGFSSPVPAVTVPVPPPSDAGPPCALNMPFGKLGRLLLIL	30|40	4.1|4.1	1|1	2|2	2|2	1|1	1|1	---	---	-	-	-	-	---	---	-	-	-	-	---	---	-	-	-	-	---	---	-	-	-	-	Unigene5180_All	77.57	2e-47	gi|449525966|ref|XP_004169987.1|	PREDICTED: mavicyanin-like [Cucumis sativus]	52.53	6e-28	sp|P80728|MAVI_CUCPE	Mavicyanin OS=Cucurbita pepo PE=1 SV=1	77.14	7e-44	A5BTU9	A5BTU9_VITVI Putative uncharacterized protein OS=Vitis vinifera GN=VITISV_025412 PE=4 SV=1	-
418	CL8784.Contig1_All	196 1035 chloroplast post-illumination chlorophyll fluorescence increase protein [Nicotiana tabacum] >CL8784.Contig2_All 193 1032 chloroplast post-illumination chlorophyll fluorescence increase protein [Nicotiana tabacum]	35584	ATAATSASLFNSSKQIASASSRIAGTSPSKTHAISFLGAPLWSHYPIKRKLTKISGKVIAAAPVAAAPVEEIKEYVLPTWAEFDLGRAPVYWKTMNGLPPTAGERLKIFYNPAANKLVPNEEFGVAFNGGFNQPIMCGGEPRAMLQKVRGKADPLIYTIQICIPKHALSLIFSFTNGTEWDGPYRLQFQVPKAWRNRPIEFFTEGLAEELSKEGACEQAIFPDTNIVVPRCAMIGNLSVEGGDRCNLDLVPGCIDPSSPMFNPLANVDDGSCPPYSDSED	67|48	7.5|5.0	-|-	3|2	3|2	2|1	2|1	---	---	-	1	-	-	---	---	-	-	-	-	---	---	1	1	-	-	---	---	1	-	-	-	CL8784.Contig1_All	82.72	3e-95	gi|118486567|gb|ABK95122.1|	unknown [Populus trichocarpa]	-	-	-	-	82.72	3e-94	A9PFG9	A9PFG9_POPTR Putative uncharacterized protein OS=Populus trichocarpa PE=2 SV=1	-
419	Unigene31036_All	201 329 minus strand Chain A, Crystal Structure Of The Spinach Aquaporin Sopip2;1 S274e Mutant >gi|224036301|pdb|3CN6|B Chain B, Crystal Structure Of The Spinach Aquaporin Sopip2;1 S274e Mutant	6012	MTKEVSEEAVAHQHGKDYVDPPPAPFLGVGELKLWSFYRALIA	118|88	39.5|39.5	-|-	6|2	6|2	1|1	1|1	0.761	0.629	6	2	-	*	0.973	1.042	5	2	-	-	1.116	1.231	6	2	-	-	0.738	0.795	5	2	-	-	Unigene31036_All	85.71	1e-07	gi|196259706|dbj|BAG68661.1|	plasma membrane intrinsic protein [Tulipa gesneriana]	79.07	9e-13	sp|P93004|PIP27_ARATH	Aquaporin PIP2-7 OS=Arabidopsis thaliana GN=PIP2-7 PE=1 SV=2	85.71	1e-06	B3XXK5	B3XXK5_TULGE Plasma membrane intrinsic protein OS=Tulipa gesneriana GN=TgPIP2;1 PE=2 SV=1	-
420	CL5897.Contig2_All	118 894 PREDICTED: minor allergen Alt a 7-like [Vitis vinifera]	32289	MGKGGGCVPSKKKLPKTTTTAAAEDEANLPESPPPTTTNAAATDEPVTTTTPSDPTRNPKLLIVFYSMYGHVEGLARRMKRGADSVGGVEAVLYRVPETLPDDVLSKMWAPPKDDSIPVIGSPAELAGADGFLFGFPTRYGCMAAQMKAFFDSTGQLWREQKLAGKPAGFFVSTGTQGGGQETTAWTAITQLAHHGMLFVPIGYTFGAGMFKVDSVRGGSPYGAGVFAGDGTREPSETELALAEHQGKYMAAMVKRLAQ	20|-	5.4|-	-|-	2|-	2|-	1|-	1|-	---	-	-	-	-	-	---	-	-	-	-	-	---	-	-	-	-	-	---	-	-	-	-	-	CL5897.Contig2_All	90.44	3e-59	gi|147862580|emb|CAN79342.1|	hypothetical protein VITISV_032108 [Vitis vinifera]	52.71	2e-45	sp|P42058|ALTA7_ALTAL	Minor allergen Alt a 7 OS=Alternaria alternata GN=ALTA7 PE=1 SV=1	90.44	3e-58	A5BUH9	A5BUH9_VITVI Putative uncharacterized protein OS=Vitis vinifera GN=VITISV_032108 PE=4 SV=1	wrbA
421	CL11744.Contig2_All	49 912 uncharacterized protein LOC100812074 [Glycine max]	38239	MAMAAAIPASLFLRTSLFHSFSFTAKPHSFNLKASTMERSEIKEEENEGVNEKKKIFVAGATGSTGKRIVEQLLAKGFAVKAGVRDVDKAKSTFPGNNPDLQIVKADVTEGSTKLADAISDDSDAVICATGFRPSWDLLAPWKVDNFGTVNLVEACRKRNVNRFILISSILVNGAAMGQLFNPAYIFLNVFGLTLVAKLQAEQDIRKSGINYTIIRPGGLRNDPPKGNIVMEPEDTLYEGSISRDQVAEVAVEALLHPESSYKVVEIVARTEAPKRSFEELFGSIKQQ	418|360	19.1|17.4	-|-	13|13	13|13	4|4	4|4	0.7	0.868	10	11	-	-	1.309	1.181	5	6	-	-	0.943	1.145	7	10	-	-	0.783	0.859	6	7	-	-	CL11744.Contig2_All	87.07	1e-107	gi|147811195|emb|CAN70158.1|	hypothetical protein VITISV_030015 [Vitis vinifera]	67.83	3e-98	sp|Q8H124|Y2446_ARATH	Uncharacterized protein At2g34460, chloroplastic OS=Arabidopsis thaliana GN=At2g34460 PE=1 SV=1	89.89	6e-82	I1K334	I1K334_SOYBN Uncharacterized protein OS=Glycine max GN=Gma.55203 PE=4 SV=1	alr2751
422	CL13038.Contig2_All	142 678 minus strand unnamed protein product [Vitis vinifera]	26504	MSRHPEVKWAEREEKIYLTVLLPDAKNPKVNVDPNGAFTFSATAGTDNNIYELKLDLLDKVDVEESKINIGVRNIFCVLEKAEKKWWTKLLCGDEKTPHYVKVDWDKWVDEDDDTGGPGDLDLGGMDFSKFGDMGGLGDDSMGDDFEDSDDEEVKKPEEKADDKAEGEASEGKAEHLPS	42|54	13.4|13.4	-|-	3|4	3|4	2|2	2|2	1.331	0.814	3	3	*	-	0.997	1.372	3	2	-	-	1.03	0.816	3	4	-	-	0.851	---	3	1	-	-	CL13038.Contig2_All	76	1e-32	gi|225437334|ref|XP_002264898.1|	PREDICTED: uncharacterized protein OsI_027940-like [Vitis vinifera]	67	6e-30	sp|P0C8Z0|Y8359_ORYSI	Uncharacterized protein OsI_027940 OS=Oryza sativa subsp. indica GN=OsI_027940 PE=1 SV=2	76	1e-31	F6HZ37	F6HZ37_VITVI Putative uncharacterized protein OS=Vitis vinifera GN=VIT_07s0005g00250 PE=4 SV=1	-
423	Unigene23675_All	245 2638 PREDICTED: ATP-dependent zinc metalloprotease FTSH 9, chloroplastic-like [Vitis vinifera]	101145	IIYRRISAFRYNNPNYLHNYTFLCSRYRAFHGKPGRLLHDTVSFRLQPRVSKLQGYFLKNHLNWKFTKIYANSPREHDTDTTDKTETSGPESPKKPGAGSGPGRREKQGKNNWWDNNSNKWRWQPIIQAQEMGVLLIQLGIVMFVMRLLRPGIPLPGSEPRAPTAFVSVPYSEFLSRINSNQVQKVEVDGVHIMFKLKREAWGVESVVGEVNSKLQDSDSLLRSVTPTKRVVYTTTRPIDIKTPYEKMLENDVEFGSPDKRSGGFLNSALIALFYVAVLAGLLHRFPVSFSQHTPGQLRNRKSGNSGGAKVSEQGETVMFADVAGVDEAKEELEEIVEFLRNPDRYIRLGARPPRGVLLVGLPGTGKTLLAKAVAGEADVPFISCSASEFVELYVGMGA…	-|20	-|0.8	-|-	-|1	-|1	-|1	-|1	-	---	-	1	-	-	-	---	-	1	-	-	-	---	-	1	-	-	-	---	-	1	-	-	Unigene23675_All	94.47	4e-124	gi|302425099|sp|P85190.1|FTSH_HELAN	RecName: Full=ATP-dependent zinc metalloprotease FTSH, chloroplastic	94.47	2e-124	sp|P85190|FTSH_HELAN	ATP-dependent zinc metalloprotease FTSH, chloroplastic (Fragment) OS=Helianthus annuus GN=FTSH PE=1 SV=1	87.59	0	B9HP69	B9HP69_POPTR Predicted protein OS=Populus trichocarpa GN=POPTRDRAFT_1088198 PE=3 SV=1	all4936
424	Unigene31090_All	127 1029 unnamed protein product [Vitis vinifera]	45298	MAFVKALKTKAYFKRYQVKFKRRRQGKTDYRARIRLINQDKNKYNTPKYRFVVRFTNKDIIAQIVSASIAGDHVLAAAYAHELPHYGLKAGLTNYSAAYCTGLLLARRVLKKLEMDEEYEGNVEATGEDYSVEPAESRRPFRALLDVGLLKTTTGNRVFGALKGALDGGLDIPHSDKRFAGFNKDNKQLDPEVHRKYIYGGHVAAYMNTLMEDEPEKYQSHFSEYIKKGVEPDDIEEIYKKVHAAIRADPTEKKSEKQPRKEHKRYNLKKLTYEERKVKLIERLNALNAAAGNDDEDEDDD	248|199	11.6|11.6	-|-	13|8	12|6	3|3	2|2	0.515	0.556	12	6	*	*	2.058	1.119	7	6	*	-	0.891	1.094	9	6	-	-	0.69	0.637	8	6	*	*	Unigene31090_All	92.59	3e-21	gi|449511410|ref|XP_004163948.1|	PREDICTED: 60S ribosomal protein L5-like [Cucumis sativus]	83.85	6e-135	sp|Q6UNT2|RL5_CUCSA	60S ribosomal protein L5 OS=Cucumis sativus GN=RPL5 PE=2 SV=1	89.62	1e-141	B9SFU0	B9SFU0_RICCO Ribosomal protein L5, putative OS=Ricinus communis GN=RCOM_0723170 PE=3 SV=1	SPBC11C11.09c
425	CL832.Contig5_All	2601 4760 minus strand psaA gene product (chloroplast) [Sesamum indicum] >gi|347448295|gb|AEO92706.1| photosystem I P700 chlorophyll a apoprotein A1 (chloroplast) [Sesamum indicum]	85799	FSQGLAQDPTTRRIWFGIATAHDFESHDDITEERLYQNIFASHFGQLAIIFLWTSGNLFHVAWQGNFESWVQDPLHVRPIAHAIWDPHFGQPAVEAFTRGGALGPVNIAYSGVYQWWYTIGLRTNEDLYTGALFLLFLSAISLIAGWLHLQPKWKPSVSWFKNAESRLNHHLSGLFGVSSLAWTGHLVHVAIPGSRGEYVRWNNFLDVLPHPQGLGPLFTGQWNLYAQNPDSSSHLFGTSQGAGTAILTLLGGFHPQTQSLWLTDIAHHHLAIAFIFLVAGHMYRTNFGIGHSIKDLLDAHIPPGGRLGRGHKGLYDTINNSLHFQLGLALASLGVITSLVAQHMYSLPAYAFIAQDFTTQAALYTHHQYIAGFIMTGAFAHGAIFFIRDYNPEQNKDN…	1430|1211	14.4|14.4	-|-	56|40	56|40	7|7	7|7	0.523	0.761	45	32	-	-	1.524	1.509	34	30	*	*	0.849	0.551	41	30	*	-	0.909	0.842	36	31	-	-	CL832.Contig5_All	99.72	0	gi|442742962|ref|YP_007353914.1|	photosystem I P700 chlorophyll a apoprotein A2 (chloroplast) [Tectona grandis] >gi|438687603|emb|CCP47129.1| photosystem I P700 chlorophyll a apoprotein A2 (chloroplast) [Tectona grandis] >gi|438688287|emb|CCP47218.1| photosystem I P700 chlorophyll a apoprotein A2 (chloroplast) [Tectona grandis] >gi|438688411|emb|CCP47307.1| photosystem I P700 chlorophyll a apoprotein A2 (chloroplast) [Tectona gr…	99.44	0	sp|Q33332|PSAB_ANTMA	Photosystem I P700 chlorophyll a apoprotein A2 OS=Antirrhinum majus GN=psaB PE=3 SV=1	99.72	0	G9IB61	G9IB61_SESIN Photosystem I P700 chlorophyll a apoprotein A2 OS=Sesamum indicum GN=psaB PE=3 SV=1	-
426	CL13438.Contig1_All	89 817 minus strand Auxin-induced in root cultures protein 12 precursor, putative [Ricinus communis] >gi|223527159|gb|EEF29331.1| Auxin-induced in root cultures protein 12 precursor, putative [Ricinus communis]	28049	MAASSFLFVAAVALLVSPALSLTCTSQTFSQNTTRFANCSDLPTLKAFLHWTYDPTAKPNPTLSIAFIAPPARPNGWVAWALNPTGSGMLGAQALIAFRGTNGSIVVKTYNISSYGPIAESKISYDVLNKRGEYSDGVLRIFATLALPGGDAEVNQVWQVGSSVNNGVPAKHDFSPDNLSSKNTLQLLSNAAEKGDAPAAAPASVAPSGRQSGNDTGGSSRVWGSGLGLYGVLVLLGVSNFGF	23|-	3.3|-	-|-	1|-	1|-	1|-	1|-	---	-	-	-	-	-	---	-	-	-	-	-	---	-	-	-	-	-	---	-	-	-	-	-	CL13438.Contig1_All	56.36	5e-48	gi|462395318|gb|EMJ01117.1|	hypothetical protein PRUPE_ppa006889mg [Prunus persica]	47.9	3e-36	sp|Q94BT2|AIR12_ARATH	Auxin-induced in root cultures protein 12 OS=Arabidopsis thaliana GN=AIR12 PE=1 SV=3	54.55	1e-25	O49945	O49945_SOLTU Putative uncharacterized protein OS=Solanum tuberosum PE=2 SV=1	-
427	CL11310.Contig2_All	170 1540 UGT88D6 [Sesamum indicum]	57785	MEDTIVLYASPEHLNSMLVLAKFISKHHPSIPVIILSSAADSAAVSIATVPSITYRRIPTAALPPNLTTNPVELFFEIPRLNNPNLRDALEEISQKSRIKAFVIDFFCNAACEVSTGLNIPTYFYVSSGAFGLCAFLYFPTIDETIPENIGDLRDFLEVPGCPPIYSLDFPNGMFFRQSNTYKHFLDTAKNMRKSTGIVVNAFDALEFRAKEALSSGLCIPDAPTPPVYLVGPLVGESNNKNGGAEHECLRWLDSQPSKSVIFLCFGRRGLFSAEQLKEMALGLENSGHRFLWSVRSPPGKRNLAAADEPDLDELLPEGFRERTKDRGFVIKSWAPQKEVLSHDSVAGFVTHCGRSSILEAVSFGVPMIGWPIYAEQRMNRVFMVEEMKVALPLEEGAD…	30|67	2.0|6.3	-|-	1|2	1|2	1|2	1|2	---	---	-	1	-	-	---	---	-	-	-	-	---	---	-	1	-	-	---	---	-	-	-	-	CL11310.Contig2_All	81.18	0	gi|187761617|dbj|BAG31947.1|	UGT88D6 [Sesamum indicum]	65.15	9e-164	sp|Q76MR7|UBGAT_SCUBA	Baicalein 7-O-glucuronosyltransferase OS=Scutellaria baicalensis GN=UBGAT-I PE=1 SV=1	81.18	0	B2NID1	B2NID1_SESIN UGT88D6 OS=Sesamum indicum GN=SiUGT23 PE=2 SV=1	-
428	CL6936.Contig1_All	70 867 unnamed protein product [Vitis vinifera]	44734	SIPHSKREMAPKKGAKLPAAAKKKAEKVVNPLFEKRPKQFGIGGALPPKKDLHRFVKWPQVVRIQRKKMILKQRLKVPPPIHQFSKTLDKNLATSLFKMLLKYRPEDRAQKKERLLKRAQAEAEGKTPEFKKPIVVKYGLNHVTYLIEQNKAQLVVIAHDVDPIELVVWLPALCRKMEIPYCIVKGKARLGTIVHKKTASVLCLTSVKNEDKLDFSKILEAIKANFNDKYDETRKKWGGGVMGSKSQAKTKAKERLLAKEAAQRMT	77|36	7.1|4.1	-|2	3|3	3|3	2|1	2|1	0.01	---	2	1	-	-	---	---	1	1	-	-	---	---	1	1	-	-	0.001	---	2	1	-	-	CL6936.Contig1_All	92.59	9e-39	gi|242079845|ref|XP_002444691.1|	hypothetical protein SORBIDRAFT_07g026085 [Sorghum bicolor] >gi|241941041|gb|EES14186.1| hypothetical protein SORBIDRAFT_07g026085 [Sorghum bicolor]	90.04	2e-117	sp|P35685|RL7A_ORYSJ	60S ribosomal protein L7a OS=Oryza sativa subsp. japonica GN=RPL7A PE=2 SV=1	90.87	3e-117	D7SH25	D7SH25_VITVI Putative uncharacterized protein OS=Vitis vinifera GN=VIT_17s0000g00980 PE=4 SV=1	SPBC29A3.04
429	CL5449.Contig4_All	136 615 PREDICTED: uncharacterized protein LOC100258718 [Vitis vinifera] >gi|297745958|emb|CBI16014.3| unnamed protein product [Vitis vinifera]	21350	RPNRSDVHLNGEEAAKLEATTRDYFDGVAPKRHTKPQRSEYSSAYADALSSDDHRVIPEYVQFERLEKDTQKLVYSGGKVAEDFTETEYYRDLNGIDKQHHTTGTGFIKVDNTNGKGFSLAPDSATECHALCRGNPATNDWIPTTADMVDFITGKPNRSD	65|76	19.4|19.4	1|1	3|5	3|5	3|3	3|3	0.024	0.347	2	3	-	-	---	2.169	1	2	-	-	0.709	4.634	2	2	-	-	---	---	1	1	-	-	CL5449.Contig4_All	66.88	1e-50	gi|225434704|ref|XP_002280988.1|	PREDICTED: uncharacterized protein LOC100258718 [Vitis vinifera] >gi|297745958|emb|CBI16014.3| unnamed protein product [Vitis vinifera]	-	-	-	-	66.88	1e-49	D7SK38	D7SK38_VITVI Putative uncharacterized protein OS=Vitis vinifera GN=VIT_06s0004g05960 PE=4 SV=1	-
430	CL11890.Contig2_All	84 1124 PREDICTED: xylem cysteine proteinase 2-like [Glycine max]	48868	SKLLFLASFMLFSLLITASARDFSIVGYSPDDLACIDKLINLFESWIDKHGKKYKSLEEKLHRFEIFKDNLKHIDERNKVTSNYWLGLNEFADMSHDEFKKMYLGLKADQLPKRNESPEEFKYRDFENLPKSVDWRKKGAVTRIKNQGSCGSCWAFSTVAAVEGINQIVTGNLTELSEQELIDCDTTYNNGCNGGLMDYAFTYIVSNGGLHKEEDYPYLMEEGTCEENRDESKLVTISGYHDVPANDDQSLLKALANQPLSVAIEASGRDFQFYSGGVFDGHCGTELDHGVAAVGYGSSKGLDYIIVKNSWGPKWGEKGYIRMKRNTGKPAGMCGINRMASFPTKTK	115|139	6.9|6.9	-|-	4|4	4|4	2|2	2|2	0.523	1.068	4	4	-	-	---	0.963	1	4	-	-	1.187	0.777	3	4	-	-	1.069	1.13	2	4	-	-	CL11890.Contig2_All	82.99	1e-165	gi|460385525|ref|XP_004238454.1|	PREDICTED: xylem cysteine proteinase 1-like [Solanum lycopersicum]	80.95	2e-14	sp|P32956|CYSP3_CARCN	Cysteine proteinase 3 (Fragment) OS=Carica candamarcensis PE=1 SV=1	82.54	1e-119	C5NU04	C5NU04_LOTJA Cysteine protease OS=Lotus japonicus GN=LjCP PE=2 SV=1	AF1946_2
431	CL6686.Contig7_All	291 1187 FIL2 [Antirrhinum majus]	37718	KKVLLKIKEAFNNPYHLASWNPDTDCCYWYVVECDRKTNRINNLHLFAANVSGQIPEAVADLPYLESLTFHKITNLTGTIPPALARLTNLKMLTISWTNISGPIPSFLGQLKNLTFLGLSFNFFSGSIPPSLAQLRNLNGLRLDRNQLTGSIPESFGDLTPSLQYLYLSHNQLSGTVPRAWGDLNFTSIQIERNRLEGDISFLFGKNKTIQIVDFSRNMLQFDLSNVEFPDSLRTLDLNHNRITGSLPEGLTNLDSLYLNVSYNRLCGRIPVGGRLQELDYSSYFHNRCLCGAPLPDCK	32|-	6.7|-	1|-	2|-	1|-	2|-	1|-	---	-	-	-	-	-	---	-	-	-	-	-	---	-	-	-	-	-	---	-	-	-	-	-	CL6686.Contig7_All	81	2e-127	gi|444011|emb|CAA54303.1|	FIL2 [Antirrhinum majus]	64.88	7e-97	sp|Q05091|PGIP_PYRCO	Polygalacturonase inhibitor OS=Pyrus communis GN=PGIP PE=1 SV=1	81	2e-126	Q38738	Q38738_ANTMA FIL2 protein OS=Antirrhinum majus GN=FIL2 PE=4 SV=1	alr0124_1
432	Unigene12552_All	377 1840 minus strand putative sugar transporter [Nicotiana langsdorffii x Nicotiana sanderae]	58091	MKVGASSEEAKSFNSETTQQEVFAWSSVVLPFLFPALGGLLFGYDIGATSGATISLQSPELSGTSWFNLSAVQLGLVVSGSLYGALLGSLIVYPLADFLGRNRELIIASLFYLIGGLLTAYAPGLGVLLIARLLYGLGIGMAMHGAPLYIAETCPSQIRGTLISLKELFIVLGILLGYFVGSFEINAVGGWRYMYGFSAPFAFLMGLGMWSLPPSPRWLLLRAVQGKGPLQEYKEKAILALRKLRGGSGDDNVSEKQIEDALVSLKTAYADQDPEGSFLEVFQGPSLKAFIIGGGLVLFQQITGQPSVLYYAGPILQTAGFAAAADATKLSVVVGVFKLLMTGIAVLKVDDLGRRPLLIGGVAGLAFSLLLLSAYYKFLGGFPFVAVAALLLYVGCYQI…	-|86	-|4.1	-|-	-|4	-|4	-|2	-|2	-	0.921	-	3	-	-	-	0.987	-	3	-	-	-	1.006	-	3	-	-	-	0.933	-	3	-	-	Unigene12552_All	90.68	3e-60	gi|449533930|ref|XP_004173923.1|	PREDICTED: D-xylose-proton symporter-like 3, chloroplastic-like, partial [Cucumis sativus]	79.92	4e-166	sp|Q0WWW9|XYLL3_ARATH	D-xylose-proton symporter-like 3, chloroplastic OS=Arabidopsis thaliana GN=At5g59250 PE=1 SV=2	83.92	2e-167	E3VWY8	E3VWY8_VITVI Putative vacuolar glucose transporter OS=Vitis vinifera GN=VGT2 PE=3 SV=1	L140856
433	Unigene20270_All	101 1177 disulfide oxidoreductase, putative [Ricinus communis] >gi|223532024|gb|EEF33834.1| disulfide oxidoreductase, putative [Ricinus communis]	45850	SKLLNSLRKARNLIGVATLTTAAAAGPPKFSAMESDLQTLKTRLCIVGSGPAAHTAAIYAARAELKPFLFEGWMANDIAPGGQLTTTTEVENFPGFPDGIGGIDLMDRCRAQSVRFGTQIFTETVSKVDFSAFPFKIYSDSKTVLADSVIIATGAVAKRLNFPGSDTFWNRGISACAVCDGAAPIFRNKPLAVIGGGDSAMEEANFLTKYGSKVYIIHRRDEFRASKIMQSRALSNPKIEVLWNSMVTEAYGERTLGGLKVKNVGSGEVSDLKVSGLFFAIGHEPATKFLDGQLELDSDGYVITKPGTTLTSVKGVFAAGDVQDKKYRQAITAAGTGCMAALDAEHYLQEIGSQEGKSD	36|41	5.6|7.0	-|-	2|2	2|2	2|2	2|2	---	---	1	1	-	-	---	---	1	1	-	-	---	---	1	1	-	-	---	---	1	1	-	-	Unigene20270_All	91.15	2e-53	gi|224056737|ref|XP_002298998.1|	predicted protein [Populus trichocarpa] >gi|222846256|gb|EEE83803.1| predicted protein [Populus trichocarpa]	84.29	1e-154	sp|Q39242|TRXB2_ARATH	Thioredoxin reductase 2 OS=Arabidopsis thaliana GN=NTR2 PE=2 SV=2	83.33	1e-150	D7MD04	D7MD04_ARALL Thioredoxin reductase OS=Arabidopsis lyrata subsp. lyrata GN=NTR1 PE=3 SV=1	YDR353w
434	CL11865.Contig2_All	216 1223 minus strand CMV 1a interacting protein 1 [Nicotiana tabacum]	43942	RIAAAQSSGGELAAEFEEGQLERPKWTGETPLSRLVGALISFKPLYSVLKLGARQVLISTAEKTNIPWRDMTKEILESDVYKEKGAIEDSSIVYPDYYLNPFHAYDEGNLSWLAAAEAEAATMSMVRRAIPYASSLDEANQIVRGNWLQAIENCHQQYSGNSKIGDILDIGCSVGVSTRFLADKFPSAKVTGLDLSPYFVAVAQYKEKKRNPRKEPIRWIHGNGENTGLPSKSFDLVSIAYVFHECPERAIKNMVKEAFRLLRPGGTFAVTDNSPKSKILQELSPVLFTLMKSTEPFLDEYYLTDLEGTLQQVGFVNVQTALTDPRHRTVTATVPF	37|51	4.8|4.8	1|1	1|2	1|2	1|1	1|1	---	0.656	-	2	-	-	---	---	1	1	-	-	---	1.79	-	2	-	-	---	---	1	1	-	-	CL11865.Contig2_All	83.8	4e-156	gi|460405455|ref|XP_004248191.1|	PREDICTED: uncharacterized protein LOC101245590 [Solanum lycopersicum]	32.41	2e-06	sp|O86169|UBIE_GEOSE	Demethylmenaquinone methyltransferase OS=Geobacillus stearothermophilus GN=ubiE PE=3 SV=1	82.93	3e-158	Q5DT22	Q5DT22_TOBAC CMV 1a interacting protein 1 OS=Nicotiana tabacum PE=2 SV=1	sll0564
435	CL9736.Contig2_All	161 913 unknown [Lotus japonicus]	32117	MLAVLHKSVAKSPEALLQSPQTESVSVLKDGFLATHFSSVHPGSVIINLASSGFIAYTSERQNPLLPRLFAVVDDIFCLFEGHIENVAHLKQQYGLNKSANEVIIVIEAYRTLRDRGPYPADQVVRDIQGKFAFILFDSSSKATFIASDADGSVPFFWGTDAEGNLVVSNDSEFVKQGCGKSFAPFPKGCFFTSSGGLRSYEHPINELKAVPRVDSSGEVCGLTFKVDAESRKGKTGMPRVGSDANWSEHY	37|62	7.2|7.2	1|1	1|2	1|2	1|1	1|1	---	---	-	1	-	-	---	---	-	1	-	-	---	---	-	1	-	-	---	---	-	1	-	-	CL9736.Contig2_All	81.82	7e-62	gi|327493153|gb|AEA86283.1|	stem-specific protein TSJT1-like protein [Solanum nigrum]	39.86	2e-28	sp|P24805|TSJT1_TOBAC	Stem-specific protein TSJT1 OS=Nicotiana tabacum GN=TSJT1 PE=2 SV=1	81.82	7e-61	F4YB85	F4YB85_SOLNI Stem-specific protein TSJT1-like protein (Fragment) OS=Solanum nigrum GN=TSJT1 PE=2 SV=1	YPO2623
436	CL14255.Contig1_All	72 926 minus strand PREDICTED: 29 kDa ribonucleoprotein B, chloroplastic [Vitis vinifera]	39474	LGAKEAAASIFSSYYPPTSPKVHSFNKSLSSVRFGISLSAPAASLKFTLYNLSLLSSSQPAKKPGFQLHSAVESITVEEDVEKTQKTDNRRKLFVLNLPWSFSVADIKKLFGECGSVADVEIIKQKDGKNRGFAFVTMASGEEAQAAIEKYDSYELVGRIIRVQFARRFKKPIRTVPVSPPPGETHYKLYVSNLAWKVRSNNLREFFSSNFSPVSVRVVFDNPSGKSAGYGFVSFATKEEAESAISVLDGKELLGRPIRLKFSEKNTDASESKEEESSEQQPEES	28|50	4.6|4.6	1|1	1|1	1|1	1|1	1|1	---	---	1	1	-	-	---	---	1	1	-	-	---	---	1	1	-	-	---	---	1	1	-	-	CL14255.Contig1_All	70.56	3e-79	gi|297742089|emb|CBI33876.3|	unnamed protein product [Vitis vinifera]	40.79	1e-06	sp|Q9C909|RBG5_ARATH	Glycine-rich RNA-binding protein 5, mitochondrial OS=Arabidopsis thaliana GN=RBG5 PE=2 SV=1	71.07	3e-71	F6HT84	F6HT84_VITVI Putative uncharacterized protein OS=Vitis vinifera GN=VIT_02s0012g01420 PE=4 SV=1	YCL011c
437	Unigene12988_All	50 523 minus strand calmodulin, putative [Ricinus communis] >gi|223546914|gb|EEF48411.1| calmodulin, putative [Ricinus communis]	18179	LSMAQSDSLSLEMETLNHVMGLVEAFRAFDSDNDGSINAQELGGIMGSLGYNVSEEDVQAMMQKGDGDRDGLLSISEFLDMNTGGLDLGGLTALKTALEALDLEEHDLITGEELYQVIENMGIELSLDDCLDIVASMDGDGDGAITFEDFKLIVNSLL	28|36	4.4|4.4	-|-	1|1	1|1	1|1	1|1	---	---	1	1	-	-	---	---	1	1	-	-	---	---	1	1	-	-	---	---	1	1	-	-	Unigene12988_All	63.16	3e-19	gi|462396220|gb|EMJ02019.1|	hypothetical protein PRUPE_ppa025813mg, partial [Prunus persica]	45.61	2e-06	sp|Q948R0|CML5_ORYSJ	Calmodulin-like protein 5 OS=Oryza sativa subsp. japonica GN=CML5 PE=2 SV=1	60.81	5e-30	F6H0M4	F6H0M4_VITVI Putative uncharacterized protein OS=Vitis vinifera GN=VIT_18s0001g03880 PE=4 SV=1	SPAC3A12.14
438	CL811.Contig4_All	120 1316 minus strand fructose 1,6 bisphosphate aldolase class 1 [Carica papaya] >CL811.Contig13_All 120 1316 fructose 1,6 bisphosphate aldolase class 1 [Carica papaya]	51147	MASASLLKSSPVLDKSEFVKGQSTLLRQPSASVVRCHPNAASSPLTVRSSSYADELVKTAKTIASPGRGILAMDESNATCGKRLASIGLENTEANRQAYRTLLVSAPGLGQYISGAILFEETLYQSTTDGKKMVDVLVEQNIVPGIKVDKGLVPLAGSNDESWCQGLDGLASRSAAYYQQGARFAKWRTVVSIPNGPSALAVKEAAWGLARYAAISQDNGLVPIVEPEILLDGEHGIDRTFEVAQKVWAEVFFYLAENNVMFEGILLKPSMVTPGAECKDKATPEKVADYTLKLLRRRIPPAVPGIMFLSGGQSEVEATLNLNAMNQAPNPWHVSFSYARALQNTCLKTWGGLPENVKAAQETLLVRAKANSLAQLGKYTAEGESEEAKKGMFVKGYSY	904|758	15.5|26.3	-|-	30|28	1|3	6|8	1|2	---	---	-	-	-	-	---	---	-	-	-	-	---	---	-	-	-	-	---	---	-	-	-	-	CL811.Contig4_All	94.38	4e-149	gi|297744727|emb|CBI37989.3|	unnamed protein product [Vitis vinifera]	90.99	0	sp|Q01516|ALFC1_PEA	Fructose-bisphosphate aldolase 1, chloroplastic (Fragment) OS=Pisum sativum PE=1 SV=1	94.34	2e-115	A1BQW8	A1BQW8_NICAT Fructose-bisphosphate aldolase (Fragment) OS=Nicotiana attenuata GN=ald PE=2 SV=1	XF0826
439	CL5721.Contig2_All	1876 3396 ATPase alpha subunit (chloroplast) [Olea europaea] >gi|330850728|ref|YP_004376406.1| ATP synthase CF1 alpha subunit [Olea europaea subsp. europaea] >gi|334701873|ref|YP_004564482.1| ATP synthase CF1 alpha subunit [Olea europaea subsp. m	61180	MVTIRADEISNIIRERIEQYNREVKIVNTGTVLQVGDGIARIHGLDEVMAGELVEFEEGTIGIALNLESNNVGVVLMGDGLMIQEGSSVKATGRIAQIPVSEAYLGRVINALAKPIDGRGEISASESRLIESPAPGIISRRSVYEPLQTGLIAIDSMIPIGRGQRELIIGDRQTGKTAVATDTILNQQGQNVICVYVAIGQKASSVAQVVTTLQERGAMEYTIVVAETADSPATLQYLAPYTGAALAEYFMYRKQHTLIIYDDLSKQAQAYRQMSLLLRRPPGREAYPGDVFYLHSRLLERAAKLSSSLGEGSMTALPIVETQSGDVSAYIPTNVISITDGQIFLSADLFNAGIRPAINVGISVSRVGSAAQIKAMKQVAGKLKLELAQFAELEAFAQF…	4516|3842	33.9|32.9	-|-	130|107	117|103	14|15	12|13	1.608	1.469	97	79	-	-	1.229	1.313	86	67	-	*	0.692	0.771	94	74	-	-	1.448	1.521	87	72	-	-	CL5721.Contig2_All	99.41	0	gi|442742948|ref|YP_007353900.1|	ATP synthase CF1 alpha subunit (chloroplast) [Tectona grandis] >gi|438687589|emb|CCP47115.1| ATP synthase CF1 alpha subunit (chloroplast) [Tectona grandis] >gi|438688273|emb|CCP47204.1| ATP synthase CF1 alpha subunit (chloroplast) [Tectona grandis] >gi|438688397|emb|CCP47293.1| ATP synthase CF1 alpha subunit (chloroplast) [Tectona grandis]	98.03	0	sp|P00823|ATPA_TOBAC	ATP synthase subunit alpha, chloroplastic OS=Nicotiana tabacum GN=atpA PE=2 SV=2	99.01	0	D2KLS3	D2KLS3_OLEEU ATP synthase subunit alpha, chloroplastic OS=Olea europaea GN=atpA PE=3 SV=1	sll1326
440	CL11926.Contig1_All	105 767 Ran binding protein-1 [Solanum lycopersicum] >gi|14091665|gb|AAK53813.1|AF370443_1 Ran binding protein-1 [Solanum lycopersicum]	33811	ATTTEPTTLRREEEDEEDSKPSAEDEDTGAQVAPIVKLQEVAVTTGEENEEIILDLKAKLYRFDKEGNQWKERGVGTVKLLKHKESGKVRLVMRQNKTLKICANHLVLPTMVVQEHLGNEKSCVWHAADFADGELKEETFCIRFASVENCKTFKDKIEEITESQAKDSGESEEATTAASLIEKLSVEGKDKEEKPESKDAPLSSEEKKDDNEKLEKPAAEK	61|116	7.7|7.7	-|-	3|4	3|4	1|1	1|1	1.315	1.207	2	4	-	-	0.857	1.052	2	4	-	-	0.698	0.766	2	4	-	*	0.768	0.88	2	4	*	-	CL11926.Contig1_All	82.91	4e-54	gi|217069906|gb|ACJ83313.1|	unknown [Medicago truncatula]	75	4e-66	sp|P92985|RBP1C_ARATH	Ran-binding protein 1 homolog c OS=Arabidopsis thaliana GN=RANBP1C PE=2 SV=1	82.91	4e-53	B7FFC3	B7FFC3_MEDTR Putative uncharacterized protein OS=Medicago truncatula PE=2 SV=1	SPBC1773.07c
441	CL8469.Contig1_All	305 1354 minus strand PREDICTED: uncharacterized protein LOC100245362 [Vitis vinifera] >gi|297742130|emb|CBI33917.3| unnamed protein product [Vitis vinifera]	40091	QTQQHPSNNSYQLPNSNISVAPTTSATSNTAMMHQQNPRFPFNSVAAAAAQKPLDHQYSDGSPSGSGGGWFNIEPARKKRGRPRKYSPDSSIGLGLSPAPVTQISSAGAHADSGGGGGTPLSETAAKRNRGRPPGSVKKQLDALGAPGVGFTPHVITVNSGEDIASKIMAFSQQGPRTVCILSANGAICNVTLRQPAMSGGTVTYEGRFEIISLSGSFLLSESNGSRSRTGGLSVSLAGSDGRVLGGGVAGMLKAASPVQVVVGSFIAEGKKSKTGPSSTPSSNMLNFGAPVTQASPPSPGISSESAEENDGSSPLDRGSGPYSNAGQPVQNMPMYSNMGWPNSIKMLPN	30|-	4.9|-	1|-	1|-	1|-	1|-	1|-	---	-	1	-	-	-	---	-	-	-	-	-	---	-	1	-	-	-	---	-	-	-	-	-	CL8469.Contig1_All	91.49	7e-18	gi|147815748|emb|CAN74881.1|	hypothetical protein VITISV_001409 [Vitis vinifera]	37.34	1e-09	sp|Q9S7C9|ESCA_ARATH	Putative DNA-binding protein ESCAROLA OS=Arabidopsis thaliana GN=ESC PE=2 SV=1	91.49	7e-17	A5BQF7	A5BQF7_VITVI Putative uncharacterized protein OS=Vitis vinifera GN=VITISV_001409 PE=4 SV=1	-
442	Unigene362_All	183 1385 phosphoglycerate kinase [Gossypium hirsutum]	54801	MATKKSVGSLKEADLKGKRVFVRVDLNVPLDDNSNITDDTRIRAAIPTIKYLIGYGAKVILSSHLGRPKGVTPKYSLKPLVRRLSDLLGVEVKMADDCIGGEVEKLVAGLPEGGVILLENVRFYKEEEKNDPEFAKKLASLADLYVNDAFGTAHRAHASTEGVAKYLKPSVAGFLMQKELDYLVGAVTNPKKPFAAIVGGSKVSSKIGVIESLLEKVDLLLLGGGMIFTFYKAQGHAVGSSLVEEDKLDLATSLMEKAKAKGVSLLLPSDVVIADKFAADANSKVVPASEIPDGWMGLDIGPDSIKSFGEALETTKTIIWNGPMGVFEFDKFAAGTEAIAKKLAELSGKGVTTIIGGGDSVAAVEKVGLAEKMSHISTGGGASLELLEGKTLPGVLALD…	2109|2603	43.1|43.1	3|3	64|66	17|13	12|12	6|6	1.521	1.323	16	11	-	*	1.057	1.135	9	10	-	-	0.933	0.997	13	11	-	-	1.187	1.731	10	10	-	*	Unigene362_All	95.09	6e-112	gi|152002296|gb|ABS19549.1|	CT114 [Lycopersicon peruvianum var. humifusum] >gi|152002302|gb|ABS19552.1| CT114 [Lycopersicon peruvianum var. humifusum] >gi|152002312|gb|ABS19557.1| CT114 [Lycopersicon peruvianum var. humifusum]	92.27	0	sp|Q42962|PGKY_TOBAC	Phosphoglycerate kinase, cytosolic OS=Nicotiana tabacum PE=2 SV=1	91.77	0	Q2VCK2	Q2VCK2_SOLTU Phosphoglycerate kinase OS=Solanum tuberosum PE=2 SV=1	all4131
443	Unigene30527_All	2 181 PREDICTED: probable aquaporin PIP1-4-like [Glycine max]	7217	IPITGTGINPARSLGAAIIYNRDHAWDDHWIFWVGPFIGAALAAVYHQIVIRAIPFKSRG	58|37	16.7|16.7	-|-	1|2	1|2	1|1	1|1	---	---	1	1	-	-	---	---	1	1	-	-	---	---	1	1	-	-	---	---	1	1	-	-	Unigene30527_All	98.33	2e-28	gi|356497240|ref|XP_003517470.1|	PREDICTED: probable aquaporin PIP1-4-like [Glycine max]	94.92	1e-27	sp|Q8LAA6|PIP15_ARATH	Probable aquaporin PIP1-5 OS=Arabidopsis thaliana GN=PIP1-5 PE=2 SV=2	98.33	3e-27	I1JA80	I1JA80_SOYBN Uncharacterized protein OS=Glycine max GN=Gma.56292 PE=4 SV=1	SMc01870
[truncated: 1,915 more rows]
[truncated: 10 more columns]
