# Supplementary material for: Quantitative proteome-level analysis of paulownia witches’ broom disease with methyl methane sulfonate assistance reveals diverse metabolic changes during the infection and recovery processes
Source: PeerJ. 2017 Jul 3;5:e3495. doi: 10.7717/peerj.3495 (PMC5497676; doi:10.7717/peerj.3495)
Supplement: Table S4 [file peerj-05-3495-s009.xlsx]

## Sheet: Sheet1
Table S4 KEGG annotation of the identified proteins
#	Pathway	Diff Proteins with pathway annotation (1727)	Pathway ID
1	Metabolic pathways	650 (37.64%)	ko01100
2	Biosynthesis of secondary metabolites	379 (21.95%)	ko01110
3	Ribosome	126 (7.3%)	ko03010
4	Glycolysis / Gluconeogenesis	73 (4.23%)	ko00010
5	Oxidative phosphorylation	66 (3.82%)	ko00190
6	Protein processing in endoplasmic reticulum	65 (3.76%)	ko04141
7	Carbon fixation in photosynthetic organisms	65 (3.76%)	ko00710
8	RNA transport	58 (3.36%)	ko03013
9	Pyruvate metabolism	56 (3.24%)	ko00620
10	Starch and sucrose metabolism	53 (3.07%)	ko00500
11	Spliceosome	52 (3.01%)	ko03040
12	Photosynthesis	51 (2.95%)	ko00195
13	Plant-pathogen interaction	50 (2.9%)	ko04626
14	Phenylpropanoid biosynthesis	42 (2.43%)	ko00940
15	Citrate cycle (TCA cycle)	40 (2.32%)	ko00020
16	Purine metabolism	39 (2.26%)	ko00230
17	Amino sugar and nucleotide sugar metabolism	38 (2.2%)	ko00520
18	Glyoxylate and dicarboxylate metabolism	37 (2.14%)	ko00630
19	mRNA surveillance pathway	37 (2.14%)	ko03015
20	Proteasome	37 (2.14%)	ko03050
21	Glutathione metabolism	36 (2.08%)	ko00480
22	Pentose phosphate pathway	33 (1.91%)	ko00030
23	Aminoacyl-tRNA biosynthesis	33 (1.91%)	ko00970
24	Glycine, serine and threonine metabolism	33 (1.91%)	ko00260
25	Peroxisome	32 (1.85%)	ko04146
26	Porphyrin and chlorophyll metabolism	30 (1.74%)	ko00860
27	Ascorbate and aldarate metabolism	30 (1.74%)	ko00053
28	RNA degradation	30 (1.74%)	ko03018
29	Plant hormone signal transduction	29 (1.68%)	ko04075
30	Other glycan degradation	27 (1.56%)	ko00511
31	Fructose and mannose metabolism	27 (1.56%)	ko00051
32	Galactose metabolism	26 (1.51%)	ko00052
33	Phagosome	26 (1.51%)	ko04145
34	Alanine, aspartate and glutamate metabolism	25 (1.45%)	ko00250
35	Arginine and proline metabolism	24 (1.39%)	ko00330
36	Endocytosis	23 (1.33%)	ko04144
37	Ribosome biogenesis in eukaryotes	23 (1.33%)	ko03008
38	Cyanoamino acid metabolism	23 (1.33%)	ko00460
39	Cysteine and methionine metabolism	22 (1.27%)	ko00270
40	Tyrosine metabolism	21 (1.22%)	ko00350
41	Nitrogen metabolism	20 (1.16%)	ko00910
42	Phenylalanine metabolism	20 (1.16%)	ko00360
43	Fatty acid metabolism	19 (1.1%)	ko00071
44	Pyrimidine metabolism	19 (1.1%)	ko00240
45	Fatty acid biosynthesis	18 (1.04%)	ko00061
46	Carotenoid biosynthesis	18 (1.04%)	ko00906
47	Propanoate metabolism	18 (1.04%)	ko00640
48	Flavonoid biosynthesis	17 (0.98%)	ko00941
49	alpha-Linolenic acid metabolism	16 (0.93%)	ko00592
50	Valine, leucine and isoleucine degradation	16 (0.93%)	ko00280
51	Pentose and glucuronate interconversions	16 (0.93%)	ko00040
52	Inositol phosphate metabolism	15 (0.87%)	ko00562
53	Terpenoid backbone biosynthesis	15 (0.87%)	ko00900
54	Photosynthesis - antenna proteins	14 (0.81%)	ko00196
55	Valine, leucine and isoleucine biosynthesis	14 (0.81%)	ko00290
56	Butanoate metabolism	13 (0.75%)	ko00650
57	Phosphatidylinositol signaling system	13 (0.75%)	ko04070
58	Ubiquitin mediated proteolysis	13 (0.75%)	ko04120
59	Vitamin B6 metabolism	12 (0.69%)	ko00750
60	Biosynthesis of unsaturated fatty acids	11 (0.64%)	ko01040
61	Phenylalanine, tyrosine and tryptophan biosynthesis	11 (0.64%)	ko00400
62	Protein export	10 (0.58%)	ko03060
63	Isoquinoline alkaloid biosynthesis	10 (0.58%)	ko00950
64	Stilbenoid, diarylheptanoid and gingerol biosynthesis	10 (0.58%)	ko00945
65	beta-Alanine metabolism	10 (0.58%)	ko00410
66	Selenocompound metabolism	9 (0.52%)	ko00450
67	Nucleotide excision repair	9 (0.52%)	ko03420
68	Glycerophospholipid metabolism	9 (0.52%)	ko00564
69	Tryptophan metabolism	8 (0.46%)	ko00380
70	Cutin, suberine and wax biosynthesis	8 (0.46%)	ko00073
71	Sulfur metabolism	8 (0.46%)	ko00920
72	Limonene and pinene degradation	7 (0.41%)	ko00903
73	Tropane, piperidine and pyridine alkaloid biosynthesis	7 (0.41%)	ko00960
74	Arachidonic acid metabolism	7 (0.41%)	ko00590
75	Glycerolipid metabolism	7 (0.41%)	ko00561
76	Lysine biosynthesis	7 (0.41%)	ko00300
77	One carbon pool by folate	7 (0.41%)	ko00670
78	Isoflavonoid biosynthesis	6 (0.35%)	ko00943
79	Lysine degradation	6 (0.35%)	ko00310
80	Pantothenate and CoA biosynthesis	6 (0.35%)	ko00770
81	Sphingolipid metabolism	6 (0.35%)	ko00600
82	Riboflavin metabolism	6 (0.35%)	ko00740
83	Glycosphingolipid biosynthesis - ganglio series	5 (0.29%)	ko00604
84	N-Glycan biosynthesis	5 (0.29%)	ko00510
85	Glycosaminoglycan degradation	5 (0.29%)	ko00531
86	DNA replication	5 (0.29%)	ko03030
87	Ubiquinone and other terpenoid-quinone biosynthesis	5 (0.29%)	ko00130
88	Zeatin biosynthesis	4 (0.23%)	ko00908
89	Mismatch repair	4 (0.23%)	ko03430
90	Ether lipid metabolism	4 (0.23%)	ko00565
91	Histidine metabolism	4 (0.23%)	ko00340
92	Fatty acid elongation	4 (0.23%)	ko00062
93	Steroid biosynthesis	4 (0.23%)	ko00100
94	Natural killer cell mediated cytotoxicity	3 (0.17%)	ko04650
95	ABC transporters	3 (0.17%)	ko02010
96	Circadian rhythm - mammal	3 (0.17%)	ko04710
97	Taurine and hypotaurine metabolism	3 (0.17%)	ko00430
98	Flavone and flavonol biosynthesis	3 (0.17%)	ko00944
99	Indole alkaloid biosynthesis	3 (0.17%)	ko00901
100	Brassinosteroid biosynthesis	3 (0.17%)	ko00905
101	Nicotinate and nicotinamide metabolism	3 (0.17%)	ko00760
102	Sulfur relay system	3 (0.17%)	ko04122
103	Glycosphingolipid biosynthesis - globo series	3 (0.17%)	ko00603
104	C5-Branched dibasic acid metabolism	3 (0.17%)	ko00660
105	Homologous recombination	2 (0.12%)	ko03440
106	Linoleic acid metabolism	2 (0.12%)	ko00591
107	Monoterpenoid biosynthesis	2 (0.12%)	ko00902
108	Synthesis and degradation of ketone bodies	2 (0.12%)	ko00072
109	RNA polymerase	2 (0.12%)	ko03020
110	Diterpenoid biosynthesis	2 (0.12%)	ko00904
111	SNARE interactions in vesicular transport	2 (0.12%)	ko04130
112	Glycosylphosphatidylinositol(GPI)-anchor biosynthesis	1 (0.06%)	ko00563
113	Lipoic acid metabolism	1 (0.06%)	ko00785
114	Folate biosynthesis	1 (0.06%)	ko00790
115	Glucosinolate biosynthesis	1 (0.06%)	ko00966
116	Basal transcription factors	1 (0.06%)	ko03022
117	Thiamine metabolism	1 (0.06%)	ko00730
118	Other types of O-glycan biosynthesis	1 (0.06%)	ko00514
119	Regulation of autophagy	1 (0.06%)	ko04140
120	Base excision repair	1 (0.06%)	ko03410
121	Circadian rhythm - plant	1 (0.06%)	ko04712
