# Supplementary material for: Quantitative proteome-level analysis of paulownia witches’ broom disease with methyl methane sulfonate assistance reveals diverse metabolic changes during the infection and recovery processes
Source: PeerJ. 2017 Jul 3;5:e3495. doi: 10.7717/peerj.3495 (PMC5497676; doi:10.7717/peerj.3495)
Supplement: Table S5 — comparisin 1:DAPs in PF vs. PFI comparisin 2: DAPs in PFI-20 vs. PFI60 comparison 3:non-DAPs in PF vs. PFI-60; comparison 4:non-DAPs in PFI vs. PFI-20; comparison 5: the common DAPs between PF vs. PFI and PFI-20 vs. PFI-60; comparison 6:uncommon proteins between cpmparison 3 and 4; comparison 7: common proteins between comparison 5 and 6. [file peerj-05-3495-s010.xlsx]

## Sheet: Sheet1
Table S5 overview of our comparison schemes
comparisin 1:DAPs in PF vs PFI
comparisin 2: DAPs in PFI-20 vs PFI60
comparison 3:non-DAPs in PF vs PFI-60;
comparison 4:non-DAPs in PFI vs PFI-20;
comparison 5: the common DAPs between PF vs PFI and PFI-20 vs PFI-60;
comparison 6:uncommon proteins between cpmparison 3 and 4;
comparison 7: common proteins between comparison 5 and 6.
	comparison 1						comparison 2						DAPs in PF vs. PFI-60						DAPs in PFI vs.PFI-20							comparison 3			comparison 4			comaprison 5			comparison 6			comparison 7
	Accession	PF_113-VS-PFI_116@Ratio@set1,PF_113-VS-PFI_116	PF_113-VS-PFI_116@Ratio@set2,PF_113-VS-PFI_116	PF_113-VS-PFI_116@Mean	up/down		Accession	PFI-20_117-VS-PFI60_118@Ratio@set1,PFI-20_117-VS-PFI60_118	PFI-20_117-VS-PFI60_118@Ratio@set2,PFI-20_117-VS-PFI60_118	PFI-20_117-VS-PFI60_118@Mean	up/dowmn		Accession	PFI_113-VS-PFI-60_118@Ratio@set1,PF_113-VS-PFI-60_118	PF_113-VS-PFI60_118@Ratio@set2,PF_113-VS-PFI60_118	B2_113-VS-PFI60_118@Mean	up/down		Accession	PFI_116-VS-PFI-20_117@Ratio@set1,PFI_116-VS-PFI-20_117	PFI_116-VS-PFI-20_117@Ratio@set2,PFI_116-VS-PFI-20_117	PFI_116-VS-PFI-20_117@Mean	up/down			Accession			Accession			Accession			Accession			Accession
1	CL3287.Contig1_All	1.391	1.527	1.459	up	1	Unigene30572_All	1.477	2.093	1.785	up	1	CL12428.Contig2_All	3.07	1.19	2.13	up	1	Unigene7927_All	1.056	1.288	1.172	up		1	Unigene9395_All		1	CL2867.Contig1_All		1	Unigene7821_All		1	Unigene9395_All		1	Unigene7821_All
2	CL2771.Contig1_All	1.595	1.656	1.6255	up	2	CL722.Contig1_All	2.686	1.462	2.074	up	2	Unigene33201_All	1.009	1.248	1.1285	up	2	Unigene7821_All	1.122	1.423	1.2725	up		2	Unigene7925_All		2	Unigene15028_All		2	Unigene8915_All		2	Unigene7925_All		2	Unigene8915_All
3	CL3974.Contig1_All	1.682	1.506	1.594	up	3	CL4968.Contig5_All	1.203	1.459	1.331	up	3	CL3974.Contig1_All	3.127	2.942	3.0345	up	3	Unigene23918_All	1.338	1.442	1.39	up		3	CL6284.Contig5_All		3	Unigene29780_All		3	Unigene1977_All		3	CL6284.Contig5_All		3	Unigene2121_All
4	Unigene8915_All	2.311	2.808	2.5595	up	4	CL7763.Contig1_All	2.497	1.353	1.925	up	4	Unigene8915_All	1.438	1.61	1.524	up	4	CL6379.Contig2_All	1.174	2.876	2.025	up		4	CL6583.Contig1_All		4	CL4922.Contig2_All		4	Unigene2121_All		4	CL6583.Contig1_All		4	CL4391.Contig1_All
5	CL7895.Contig2_All	1.56	1.275	1.4175	up	5	CL8143.Contig1_All	1.526	1.332	1.429	up	5	CL4622.Contig4_All	1.12	1.768	1.444	up	5	Unigene15365_All	1.173	2.607	1.89	up		5	Unigene20192_All		5	CL8386.Contig1_All		5	CL2049.Contig1_All		5	Unigene20192_All		5	CL7006.Contig1_All
6	CL4968.Contig5_All	1.011	1.272	1.1415	up	6	CL832.Contig4_All	1.864	1.21	1.537	up	6	Unigene14615_All	1.5	1.016	1.258	up	6	CL3974.Contig1_All	1.84	2.209	2.0245	up		6	Unigene23764_All		6	Unigene1474_All		6	CL4391.Contig1_All		6	Unigene23764_All		6	Unigene8870_All
7	CL4622.Contig4_All	1.653	2.263	1.958	up	7	Unigene8191_All	1.467	1.599	1.533	up	7	CL7763.Contig1_All	4.146	2.174	3.16	up	7	Unigene29478_All	1.778	1.827	1.8025	up		7	CL4504.Contig1_All		7	CL12428.Contig2_All		7	CL7006.Contig1_All		7	CL4504.Contig1_All		7	CL2226.Contig1_All
8	CL7763.Contig1_All	2.539	3.731	3.135	up	8	CL12531.Contig1_All	1.717	1.194	1.4555	up	8	CL6873.Contig3_All	1.535	1.723	1.629	up	8	Unigene8862_All	1.789	1.194	1.4915	up		8	CL5894.Contig1_All		8	Unigene33201_All		8	Unigene8870_All		8	CL5894.Contig1_All		8	CL13424.Contig1_All
9	Unigene1977_All	1.75	1.94	1.845	up	9	CL11390.Contig1_All	1.09	1.26	1.175	up	9	CL4784.Contig12_All	2.008	1.353	1.6805	up	9	CL8897.Contig2_All	1.219	1.243	1.231	up		9	CL1080.Contig1_All		9	CL4542.Contig10_All		9	CL2226.Contig1_All		9	CL1080.Contig1_All		9	CL9243.Contig2_All
10	CL14287.Contig11_All	1.712	1.577	1.6445	up	10	CL3436.Contig2_All	1.377	1.939	1.658	up	10	CL9137.Contig1_All	1.26	1.201	1.2305	up	10	CL11800.Contig2_All	1.247	1.54	1.3935	up		10	Unigene15357_All		10	Unigene8915_All		10	CL9591.Contig1_All		10	Unigene15357_All		10	CL8613.Contig1_All
11	Unigene2121_All	2.808	2.477	2.6425	up	11	CL6795.Contig4_All	1.263	1.631	1.447	up	11	Unigene8862_All	2.431	1.834	2.1325	up	11	Unigene9395_All	1.35	1.316	1.333	up		11	Unigene1837_All		11	CL360.Contig1_All		11	CL13424.Contig1_All		11	Unigene1837_All		11	CL4603.Contig2_All
12	CL6873.Contig3_All	1.477	1.603	1.54	up	12	Unigene5710_All	2.319	1.08	1.6995	up	12	CL8897.Contig2_All	2.252	1.661	1.9565	up	12	Unigene16670_All	1.426	1.386	1.406	up		12	CL10288.Contig1_All		12	CL4622.Contig4_All		12	CL9243.Contig2_All		12	CL10288.Contig1_All		12	CL5472.Contig1_All
13	CL4784.Contig12_All	1.868	1.494	1.681	up	13	CL11063.Contig2_All	1.936	1.295	1.6155	up	13	CL4548.Contig3_All	1.167	1.99	1.5785	up	13	CL6194.Contig1_All	2.059	11.014	6.5365	up		13	CL7358.Contig1_All		13	Unigene8503_All		13	CL8613.Contig1_All		13	CL7358.Contig1_All		13	Unigene1547_All
14	Unigene8862_All	1.604	1.62	1.612	up	14	CL9190.Contig2_All	1.752	1.341	1.5465	up	14	Unigene22014_All	1.123	1.644	1.3835	up	14	CL6627.Contig3_All	2.129	1.986	2.0575	up		14	CL8958.Contig1_All		14	CL77.Contig4_All		14	CL4603.Contig2_All		14	CL8958.Contig1_All		14	Unigene11415_All
15	CL8897.Contig2_All	1.984	1.041	1.5125	up	15	CL11278.Contig2_All	1.253	1.193	1.223	up	15	CL2199.Contig3_All	1.67	1.289	1.4795	up	15	CL12440.Contig2_All	1.772	1.498	1.635	up		15	CL14049.Contig1_All		15	Unigene14615_All		15	CL5472.Contig1_All		15	CL14049.Contig1_All		15	Unigene20234_All
16	CL2049.Contig1_All	1.279	1.16	1.2195	up	16	Unigene27104_All	3.368	1.119	2.2435	up	16	Unigene2147_All	1.465	1.07	1.2675	up	16	CL4390.Contig1_All	1.967	1.967	1.967	up		16	CL8892.Contig1_All		16	CL532.Contig2_All		16	Unigene1547_All		16	CL8892.Contig1_All		16	CL12527.Contig2_All
17	Unigene22014_All	1.301	1.929	1.615	up	17	CL8321.Contig2_All	1.106	1.222	1.164	up	17	CL11800.Contig2_All	1.406	1.783	1.5945	up	17	CL6284.Contig5_All	1.323	1.347	1.335	up		17	CL12440.Contig2_All		17	CL5646.Contig1_All		17	Unigene11415_All		17	CL12440.Contig2_All		17	Unigene30260_All
18	CL10958.Contig3_All	1.037	1.686	1.3615	up	18	CL1080.Contig1_All	4.621	1.581	3.101	up	18	CL6298.Contig4_All	2.785	2.47	2.6275	up	18	Unigene20325_All	1.078	1.407	1.2425	up		18	Unigene20325_All		18	CL12053.Contig1_All		18	CL2637.Contig1_All		18	Unigene20325_All		18	CL1900.Contig1_All
19	CL2054.Contig1_All	2.242	3.109	2.6755	up	19	CL13839.Contig1_All	1.375	1.067	1.221	up	19	CL3904.Contig1_All	1.571	1.922	1.7465	up	19	Unigene8870_All	1.244	1.237	1.2405	up		19	CL12173.Contig1_All		19	CL1219.Contig3_All		19	CL12059.Contig1_All		19	CL12173.Contig1_All		19	CL5429.Contig1_All
20	CL6298.Contig4_All	2.025	1.643	1.834	up	20	Unigene5831_All	1.891	1.32	1.6055	up	20	CL11390.Contig1_All	1.375	1.297	1.336	up	20	CL4531.Contig1_All	1.028	1.347	1.1875	up		20	Unigene5253_All		20	CL1077.Contig2_All		20	Unigene23782_All		20	Unigene5253_All		20	Unigene9539_All
21	CL3904.Contig1_All	1.914	2.603	2.2585	up	21	CL9658.Contig1_All	4.288	1.437	2.8625	up	21	Unigene23773_All	1.585	1.684	1.6345	up	21	Unigene5629_All	3.309	1.582	2.4455	up		21	CL6377.Contig1_All		21	Unigene27480_All		21	Unigene20234_All		21	CL6377.Contig1_All		21	CL2738.Contig1_All
22	CL4391.Contig1_All	1.403	1.355	1.379	up	22	Unigene827_All	1.482	1.231	1.3565	up	22	CL10468.Contig3_All	1.769	2.436	2.1025	up	22	CL9591.Contig1_All	2.108	1.652	1.88	up		22	CL8382.Contig1_All		22	CL8173.Contig1_All		22	CL12527.Contig2_All		22	CL8382.Contig1_All		22	CL11274.Contig1_All
23	Unigene23773_All	1.497	1.358	1.4275	up	23	CL34.Contig1_All	1.387	1.745	1.566	up	23	Unigene12536_All	1.48	1.02	1.25	up	23	CL6627.Contig1_All	1.486	1.563	1.5245	up		23	CL12981.Contig1_All		23	CL9197.Contig1_All		23	CL5170.Contig2_All		23	CL12981.Contig1_All		23	Unigene12498_All
24	CL7992.Contig2_All	1.766	1.916	1.841	up	24	CL896.Contig2_All	1.509	1.31	1.4095	up	24	CL7992.Contig2_All	1.899	1.584	1.7415	up	24	CL703.Contig5_All	1.478	1.577	1.5275	up		24	CL4138.Contig1_All		24	CL6873.Contig3_All		24	Unigene30260_All		24	CL4138.Contig1_All		24	Unigene5139_All
25	Unigene1979_All	1.616	2.488	2.052	up	25	Unigene31090_All	2.058	1.119	1.5885	up	25	Unigene1979_All	1.441	3.133	2.287	up	25	CL10437.Contig1_All	1.126	1.334	1.23	up		25	CL762.Contig2_All		25	CL8373.Contig2_All		25	CL1900.Contig1_All		25	CL762.Contig2_All		25	CL4968.Contig5_All
26	CL6620.Contig3_All	1.006	1.515	1.2605	up	26	CL832.Contig5_All	1.524	1.509	1.5165	up	26	Unigene9375_All	1.85	1.257	1.5535	up	26	Unigene5253_All	1.519	2.088	1.8035	up		26	CL7738.Contig3_All		26	Unigene5128_All		26	CL10897.Contig2_All		26	CL7738.Contig3_All		26	CL8143.Contig1_All
27	CL510.Contig1_All	1.436	1.221	1.3285	up	27	CL5721.Contig2_All	1.229	1.313	1.271	up	27	CL5520.Contig2_All	1.812	2.079	1.9455	up	27	Unigene25317_All	1.057	1.536	1.2965	up		27	CL3287.Contig1_All		27	CL4784.Contig12_All		27	CL1354.Contig4_All		27	CL3287.Contig1_All		27	CL832.Contig4_All
28	CL2883.Contig4_All	1.935	1.132	1.5335	up	28	CL3845.Contig1_All	1.131	1.344	1.2375	up	28	Unigene9399_All	2.081	1.237	1.659	up	28	CL1336.Contig2_All	1.026	1.539	1.2825	up		28	CL2771.Contig1_All		28	CL2330.Contig1_All		28	CL5429.Contig1_All		28	CL2771.Contig1_All		28	CL896.Contig2_All
29	CL6627.Contig3_All	1.565	1.347	1.456	up	29	Unigene33997_All	1.904	1.531	1.7175	up	29	Unigene13113_All	2.101	1.199	1.65	up	29	CL13300.Contig1_All	1.947	2.486	2.2165	up		29	CL2054.Contig1_All		29	CL9137.Contig1_All		29	CL5153.Contig2_All		29	CL2054.Contig1_All		29	Unigene31090_All
30	CL10237.Contig1_All	1.539	1.014	1.2765	up	30	Unigene15357_All	1.47	1.267	1.3685	up	30	CL9190.Contig2_All	2.683	2.848	2.7655	up	30	Unigene20192_All	1.506	1.533	1.5195	up		30	CL6620.Contig3_All		30	CL4279.Contig1_All		30	Unigene9539_All		30	CL6620.Contig3_All		30	CL4998.Contig1_All
31	CL9218.Contig2_All	1.425	1.66	1.5425	up	31	Unigene1837_All	1.435	1.748	1.5915	up	31	CL6627.Contig3_All	2.098	1.884	1.991	up	31	CL6377.Contig1_All	1.447	1.405	1.426	up		31	CL510.Contig1_All		31	CL4548.Contig3_All		31	CL2738.Contig1_All		31	CL510.Contig1_All		31	CL5304.Contig1_All
32	Unigene8870_All	1.684	1.962	1.823	up	32	CL9933.Contig1_All	1.595	1.54	1.5675	up	32	CL11278.Contig2_All	1.417	1.424	1.4205	up	32	CL2648.Contig1_All	1.713	2.282	1.9975	up		32	CL9452.Contig1_All		32	Unigene22014_All		32	CL11274.Contig1_All		32	CL9452.Contig1_All		32	CL1718.Contig1_All
33	CL9452.Contig1_All	1.525	1.695	1.61	up	33	CL9224.Contig1_All	2.927	1.492	2.2095	up	33	CL10237.Contig1_All	1.262	1.404	1.333	up	33	Unigene23764_All	1.138	1.247	1.1925	up		33	CL558.Contig13_All		33	CL1800.Contig12_All		33	Unigene12498_All		33	CL558.Contig13_All		33	CL4105.Contig3_All
34	CL3007.Contig1_All	1.539	1.309	1.424	up	34	CL12982.Contig1_All	1.476	1.907	1.6915	up	34	CL10968.Contig1_All	1.822	1.768	1.795	up	34	CL8482.Contig1_All	2.114	1.452	1.783	up		34	Unigene27615_All		34	CL2199.Contig3_All		34	Unigene5139_All		34	Unigene27615_All		34	Unigene31051_All
35	CL11510.Contig3_All	1.653	1.526	1.5895	up	35	CL10288.Contig1_All	1.226	1.537	1.3815	up	35	CL6665.Contig1_All	1.278	2.308	1.793	up	35	Unigene23380_All	1.544	1.225	1.3845	up		35	CL11156.Contig1_All		35	Unigene2147_All		35	Unigene30572_All		35	CL11156.Contig1_All		35	CL5710.Contig2_All
36	Unigene33456_All	1.56	1.279	1.4195	up	36	CL12276.Contig3_All	1.044	1.752	1.398	up	36	CL3007.Contig1_All	2.062	1.561	1.8115	up	36	CL3550.Contig1_All	1.242	1.277	1.2595	up		36	Unigene50434_All		36	CL8143.Contig1_All		36	CL4968.Contig5_All		36	Unigene50434_All		36	CL11786.Contig1_All
37	CL4727.Contig1_All	1.097	1.7	1.3985	up	37	CL7545.Contig2_All	1.293	1.908	1.6005	up	37	CL9854.Contig1_All	1.565	1.539	1.552	up	37	CL11526.Contig1_All	1.628	1.347	1.4875	up		37	CL6539.Contig1_All		37	Unigene27577_All		37	CL7763.Contig1_All		37	CL6539.Contig1_All
38	CL558.Contig13_All	1.724	2.1	1.912	up	38	CL6206.Contig1_All	1.848	1.68	1.764	up	38	Unigene27507_All	1.372	1.009	1.1905	up	38	CL8382.Contig1_All	1.361	2.312	1.8365	up		38	Unigene13020_All		38	CL6298.Contig4_All		38	CL8143.Contig1_All		38	Unigene13020_All
39	CL9854.Contig1_All	1.229	1.25	1.2395	up	39	Unigene5818_All	1.674	1.843	1.7585	up	39	CL495.Contig1_All	2.062	1.452	1.757	up	39	CL3606.Contig4_All	2.014	1.306	1.66	up		39	CL3159.Contig1_All		39	CL1401.Contig1_All		39	CL832.Contig4_All		39	CL3159.Contig1_All
40	Unigene27615_All	1.938	1.41	1.674	up	40	CL4998.Contig1_All	1.973	1.686	1.8295	up	40	CL6627.Contig1_All	1.959	1.753	1.856	up	40	CL2637.Contig1_All	1.194	1.402	1.298	up		40	Unigene15344_All		40	CL9831.Contig1_All		40	CL3436.Contig2_All		40	Unigene15344_All
41	CL495.Contig1_All	1.486	1.712	1.599	up	41	CL13426.Contig3_All	4.351	2.563	3.457	up	41	CL6434.Contig1_All	2.501	2.865	2.683	up	41	CL5894.Contig1_All	1.557	1.713	1.635	up		41	CL12212.Contig1_All		41	CL3904.Contig1_All		41	CL9658.Contig1_All		41	CL12212.Contig1_All
42	CL6434.Contig1_All	2.039	2.626	2.3325	up	42	CL10962.Contig2_All	1.233	2.389	1.811	up	42	CL7028.Contig2_All	1.897	2.007	1.952	up	42	CL12527.Contig1_All	1.385	1.28	1.3325	up		42	CL8389.Contig1_All		42	Unigene20207_All		42	CL34.Contig1_All		42	CL8389.Contig1_All
43	CL7028.Contig2_All	1.793	1.444	1.6185	up	43	CL5304.Contig1_All	1.295	1.445	1.37	up	43	CL896.Contig2_All	2.267	2.387	2.327	up	43	Unigene34777_All	1.333	1.293	1.313	up		43	Unigene30078_All		43	CL4391.Contig1_All		43	CL896.Contig2_All		43	Unigene30078_All
44	CL896.Contig2_All	2.144	2.051	2.0975	up	44	CL6122.Contig8_All	1.562	1.174	1.368	up	44	CL13905.Contig1_All	2.948	2.033	2.4905	up	44	CL2882.Contig3_All	1.054	1.25	1.152	up		44	Unigene13096_All		44	CL11390.Contig1_All		44	Unigene31090_All		44	Unigene13096_All
45	CL13905.Contig1_All	2.26	1.317	1.7885	up	45	CL1558.Contig1_All	1.424	1.664	1.544	up	45	CL11145.Contig1_All	1.539	1.229	1.384	up	45	CL12981.Contig1_All	2.159	2.022	2.0905	up		45	Unigene7821_All		45	CL103.Contig1_All		45	CL3845.Contig1_All		45	Unigene7821_All
46	CL11145.Contig1_All	1.568	1.433	1.5005	up	46	CL7358.Contig1_All	1.233	1.219	1.226	up	46	Unigene362_All	1.187	1.731	1.459	up	46	Unigene23782_All	2.164	1.451	1.8075	up		46	Unigene2121_All		46	Unigene23773_All		46	CL12276.Contig3_All		46	Unigene2121_All
47	CL12930.Contig1_All	1.051	1.526	1.2885	up	47	CL1718.Contig1_All	1.141	1.652	1.3965	up	47	CL5323.Contig1_All	1.681	1.53	1.6055	up	47	CL1298.Contig2_All	1.124	1.387	1.2555	up		47	Unigene8870_All		47	CL10468.Contig3_All		47	CL4998.Contig1_All		47	Unigene8870_All
48	CL11156.Contig1_All	2.854	2.474	2.664	up	48	CL11147.Contig1_All	1.299	2.17	1.7345	up	48	CL10252.Contig1_All	2.114	1.468	1.791	up	48	CL5731.Contig1_All	1.496	1.092	1.294	up		48	CL12527.Contig2_All		48	CL13512.Contig1_All		48	CL13426.Contig3_All		48	CL12527.Contig2_All
49	Unigene362_All	1.521	1.323	1.422	up	49	CL7094.Contig1_All	2.387	1.076	1.7315	up	49	CL9224.Contig1_All	2.06	1.328	1.694	up	49	CL12527.Contig2_All	1.498	1.275	1.3865	up		49	Unigene30260_All		49	Unigene13013_All		49	CL5304.Contig1_All		49	Unigene30260_All
50	CL5323.Contig1_All	1.729	2.215	1.972	up	50	CL4105.Contig3_All	1.325	1.428	1.3765	up	50	CL256.Contig2_All	1.623	1.148	1.3855	up	50	CL10762.Contig1_All	1.317	1.205	1.261	up		50	CL5429.Contig1_All		50	CL4101.Contig1_All		50	CL1718.Contig1_All		50	CL5429.Contig1_All
51	CL5728.Contig4_All	2.023	1.153	1.588	up	51	CL10469.Contig1_All	2.071	1.636	1.8535	up	51	CL4625.Contig1_All	2.468	1.462	1.965	up	51	Unigene30260_All	1.618	1.881	1.7495	up		51	CL4968.Contig5_All		51	Unigene12536_All		51	CL11147.Contig1_All		51	CL4968.Contig5_All
52	CL12646.Contig1_All	1.396	1.065	1.2305	up	52	Unigene9257_All	1.917	1.211	1.564	up	52	Unigene25950_All	2.131	2.187	2.159	up	52	Unigene5696_All	1.352	1.288	1.32	up		52	CL832.Contig4_All		52	CL7992.Contig2_All		52	CL4105.Contig3_All		52	CL832.Contig4_All
53	CL4625.Contig1_All	3.771	1.254	2.5125	up	53	CL12700.Contig1_All	1.52	1.297	1.4085	up	53	CL7545.Contig2_All	1.061	1.226	1.1435	up	53	CL10897.Contig2_All	2.272	1.497	1.8845	up		53	CL11786.Contig1_All		53	Unigene1979_All		53	CL12700.Contig1_All		53	CL11786.Contig1_All
54	Unigene50434_All	2.572	3.091	2.8315	up	54	CL6360.Contig7_All	1.38	1.357	1.3685	up	54	CL11683.Contig3_All	1.548	1.168	1.358	up	54	CL4138.Contig1_All	1.54	1.151	1.3455	up		54	Unigene7927_All		54	CL10500.Contig1_All		54	Unigene31051_All		54	Unigene7927_All
55	Unigene9575_All	1.672	1.091	1.3815	up	55	Unigene31051_All	1.588	1.367	1.4775	up	55	Unigene5818_All	2.044	1.452	1.748	up	55	CL762.Contig2_All	1.154	1.546	1.35	up		55	Unigene23918_All		55	Unigene34251_All		55	CL5710.Contig2_All		55	Unigene23918_All
56	Unigene25950_All	2.195	2.143	2.169	up	56	Unigene33680_All	1.385	1.852	1.6185	up	56	CL4243.Contig4_All	1.574	1.164	1.369	up	56	CL3901.Contig5_All	1.783	2.235	2.009	up		56	CL6379.Contig2_All		56	Unigene9375_All		56	CL11786.Contig1_All		56	CL6379.Contig2_All
57	CL1839.Contig2_All	1.783	1.139	1.461	up	57	CL9337.Contig1_All	1.552	1.73	1.641	up	57	CL7680.Contig1_All	1.646	1.456	1.551	up	57	Unigene12540_All	1.155	1.687	1.421	up		57	Unigene15365_All		57	Unigene1651_All					57	Unigene15365_All
58	Unigene25908_All	1.02	2.281	1.6505	up	58	CL2207.Contig2_All	1.621	1.666	1.6435	up	58	CL9135.Contig1_All	1.519	1.168	1.3435	up	58	CL5594.Contig1_All	1.371	1.597	1.484	up		58	Unigene31191_All		58	Unigene5656_All					58	Unigene31191_All
59	Unigene34234_All	1.23	1.263	1.2465	up	59	CL5710.Contig2_All	3.024	4.516	3.77	up	59	CL5323.Contig2_All	2.291	2.425	2.358	up	59	CL3933.Contig1_All	1.375	1.062	1.2185	up		59	Unigene8906_All		59	CL12138.Contig2_All					59	Unigene8906_All
60	CL12276.Contig3_All	4.044	2.273	3.1585	up	60	CL8958.Contig1_All	1.661	1.901	1.781	up	60	CL13426.Contig3_All	3.721	2.391	3.056	up	60	CL7738.Contig3_All	1.796	1.739	1.7675	up		60	Unigene23380_All		60	CL5520.Contig2_All					60	Unigene23380_All
61	CL12250.Contig1_All	1.414	1.291	1.3525	up	61	CL3974.Contig3_All	1.285	1.682	1.4835	up	61	CL3550.Contig1_All	1.154	1.349	1.2515	up	61	CL8011.Contig2_All	1.127	1.285	1.206	up		61	CL10638.Contig1_All		61	Unigene9399_All					61	CL10638.Contig1_All
62	CL7680.Contig1_All	1.714	1.218	1.466	up	62	CL11706.Contig1_All	1.267	1.005	1.136	up	62	CL454.Contig2_All	1.56	1.324	1.442	up	62	CL3974.Contig3_All	2.082	1.117	1.5995	up		62	CL3666.Contig1_All		62	CL5494.Contig1_All					62	CL3666.Contig1_All
63	CL9135.Contig1_All	1.711	1.559	1.635	up	63	CL11786.Contig1_All	1.326	1.341	1.3335	up	63	Unigene34740_All	2.13	1.306	1.718	up	63	CL6710.Contig1_All	1.747	1.03	1.3885	up		63	CL3528.Contig1_All		63	CL10043.Contig1_All					63	CL3528.Contig1_All
64	CL5323.Contig2_All	1.701	1.744	1.7225	up	64	CL14049.Contig1_All	2.022	3.031	2.5265	up	64	CL3818.Contig1_All	5.162	3.665	4.4135	up	64	CL11786.Contig1_All	1.18	1.457	1.3185	up		64	Unigene27539_All		64	Unigene31063_All					64	Unigene27539_All
65	CL13426.Contig3_All	2.234	3.653	2.9435	up	65	CL8892.Contig1_All	1.199	1.545	1.372	up	65	CL5112.Contig1_All	1.414	1.342	1.378	up	65	CL10395.Contig1_All	1.824	1.666	1.745	up		65	CL11526.Contig1_All		65	CL12437.Contig4_All					65	CL11526.Contig1_All
66	CL454.Contig2_All	1.1	1.347	1.2235	up	66	Unigene4957_All	1.38	1.091	1.2355	up	66	Unigene34777_All	1.953	1.722	1.8375	up	66	CL2941.Contig4_All	1.206	1.28	1.243	up		66	CL7738.Contig1_All		66	Unigene13113_All					66	CL7738.Contig1_All
67	CL3818.Contig1_All	3.79	4.692	4.241	up	67	CL8839.Contig1_All	1.647	1.272	1.4595	up	67	CL6122.Contig8_All	1.802	1.323	1.5625	up	67	CL10361.Contig1_All	1.825	1.463	1.644	up		67	CL3606.Contig4_All		67	CL9665.Contig1_All					67	CL3606.Contig4_All
68	CL6539.Contig1_All	1.11	1.672	1.391	up	1	Unigene7821_All	0.756	0.657	0.7065	down	68	Unigene23820_All	1.509	2.226	1.8675	up	1	CL3287.Contig1_All	0.756	0.764	0.76	down		68	Unigene34031_All		68	CL7006.Contig1_All					68	Unigene34031_All
69	CL10903.Contig1_All	1.443	1.017	1.23	up	2	CL8546.Contig1_All	0.574	0.739	0.6565	down	69	CL3146.Contig3_All	2.868	2.24	2.554	up	2	CL8282.Contig2_All	0.57	0.574	0.572	down		69	CL2517.Contig1_All		69	CL11861.Contig1_All					69	CL2517.Contig1_All
70	Unigene23820_All	1.115	1.728	1.4215	up	3	CL4542.Contig10_All	0.645	0.549	0.597	down	70	CL2825.Contig1_All	1.319	1.689	1.504	up	3	CL2771.Contig1_All	0.437	0.436	0.4365	down		70	CL12527.Contig1_All		70	CL623.Contig4_All					70	CL12527.Contig1_All
71	CL3146.Contig3_All	1.619	2.27	1.9445	up	4	Unigene8915_All	0.606	0.615	0.6105	down	71	CL1558.Contig1_All	1.969	1.903	1.936	up	4	Unigene31191_All	0.715	0.829	0.772	down		71	CL7249.Contig5_All		71	CL1336.Contig1_All					71	CL7249.Contig5_All
72	CL1718.Contig1_All	1.735	1.5	1.6175	up	5	Unigene1977_All	0.635	0.922	0.7785	down	72	CL1718.Contig1_All	1.634	2.464	2.049	up	5	CL2160.Contig1_All	0.949	0.806	0.8775	down		72	Unigene49492_All		72	Unigene27229_All					72	Unigene49492_All
73	CL11279.Contig2_All	1.54	2.908	2.224	up	6	Unigene2121_All	0.723	0.545	0.634	down	73	CL5731.Contig1_All	1.815	1.885	1.85	up	6	CL4968.Contig5_All	0.871	0.787	0.829	down		73	CL5409.Contig4_All		73	Unigene12023_All					73	CL5409.Contig4_All
74	CL7844.Contig1_All	1.758	1.767	1.7625	up	7	CL8173.Contig1_All	0.434	0.482	0.458	down	74	CL12985.Contig1_All	2.641	1.544	2.0925	up	7	CL7763.Contig1_All	0.619	0.593	0.606	down		74	CL2646.Contig6_All		74	CL5263.Contig7_All					74	CL2646.Contig6_All
75	Unigene13020_All	1.169	1.214	1.1915	up	8	CL2049.Contig1_All	0.784	0.775	0.7795	down	75	CL3164.Contig1_All	1.443	1.036	1.2395	up	8	Unigene1977_All	0.653	0.593	0.623	down		75	CL5745.Contig1_All		75	CL10237.Contig1_All					75	CL5745.Contig1_All
76	CL2725.Contig1_All	1.005	1.583	1.294	up	9	Unigene18905_All	0.665	0.728	0.6965	down	76	CL7094.Contig1_All	1.442	1.035	1.2385	up	9	Unigene2121_All	0.668	0.572	0.62	down		76	Unigene16670_All		76	Unigene9448_All					76	Unigene16670_All
77	CL8365.Contig1_All	1.553	1.652	1.6025	up	10	Unigene1958_All	0.34	0.503	0.4215	down	77	CL7748.Contig2_All	1.389	1.464	1.4265	up	10	CL7738.Contig1_All	0.714	0.792	0.753	down		77	CL7222.Contig1_All		77	Unigene15359_All					77	CL7222.Contig1_All
78	CL3164.Contig1_All	1.795	1.103	1.449	up	11	Unigene9395_All	0.486	0.506	0.496	down	78	CL4105.Contig3_All	1.149	1.868	1.5085	up	11	CL7404.Contig1_All	0.426	0.655	0.5405	down		78	CL11098.Contig2_All		78	CL4864.Contig7_All					78	CL11098.Contig2_All
79	CL7748.Contig2_All	1.419	1.639	1.529	up	12	Unigene15749_All	0.876	0.576	0.726	down	79	Unigene20173_All	3.055	2.369	2.712	up	12	CL12256.Contig1_All	0.613	0.809	0.711	down		79	Unigene50291_All		79	CL12692.Contig3_All					79	Unigene50291_All
80	CL4105.Contig3_All	2.005	1.74	1.8725	up	13	CL4391.Contig1_All	0.604	0.586	0.595	down	80	CL6111.Contig1_All	1.772	1.552	1.662	up	13	CL2054.Contig1_All	0.489	0.453	0.471	down		80	CL4325.Contig1_All		80	CL10968.Contig1_All					80	CL4325.Contig1_All
81	Unigene20173_All	1.898	1.939	1.9185	up	14	Unigene7925_All	0.761	0.997	0.879	down	81	CL11393.Contig2_All	1.104	1.671	1.3875	up	14	CL832.Contig4_All	0.575	0.902	0.7385	down		81	CL7984.Contig1_All		81	CL2226.Contig1_All					81	CL7984.Contig1_All
82	CL3159.Contig1_All	1.078	1.987	1.5325	up	15	CL7006.Contig1_All	0.51	0.488	0.499	down	82	CL9697.Contig1_All	2.868	1.135	2.0015	up	15	CL3436.Contig2_All	0.943	0.474	0.7085	down		82	Unigene24193_All		82	CL6665.Contig1_All					82	Unigene24193_All
83	CL6598.Contig1_All	1.668	2.51	2.089	up	16	CL6284.Contig5_All	0.736	0.692	0.714	down	83	CL10469.Contig1_All	1.305	1.166	1.2355	up	16	Unigene20359_All	0.688	0.776	0.732	down		83	CL4490.Contig1_All		83	CL3007.Contig1_All					83	CL4490.Contig1_All
84	CL5170.Contig2_All	1.219	1.235	1.227	up	17	Unigene8870_All	0.45	0.438	0.444	down	84	Unigene9257_All	1.479	1.325	1.402	up	17	CL7222.Contig1_All	0.737	0.589	0.663	down		84	CL10792.Contig1_All		84	Unigene4110_All					84	CL10792.Contig1_All
85	CL12624.Contig1_All	1.319	1.498	1.4085	up	18	CL2226.Contig1_All	0.858	0.623	0.7405	down	85	CL11723.Contig1_All	1.741	2.122	1.9315	up	18	CL6620.Contig3_All	0.806	0.644	0.725	down		85	CL7362.Contig2_All		85	Unigene23869_All					85	CL7362.Contig2_All
86	CL6111.Contig1_All	1.501	1.438	1.4695	up	19	CL6583.Contig1_All	0.488	0.555	0.5215	down	86	CL1976.Contig2_All	3.494	13154.3	6578.89	up	19	Unigene7925_All	0.966	0.741	0.8535	down		86	CL6194.Contig1_All		86	CL11323.Contig2_All					86	CL6194.Contig1_All
87	Unigene16623_All	1.361	2.622	1.9915	up	20	CL9591.Contig1_All	0.532	0.687	0.6095	down	87	Unigene31051_All	2.183	1.912	2.0475	up	20	CL510.Contig1_All	0.566	0.585	0.5755	down		87	Unigene23300_All		87	Unigene2646_All					87	Unigene23300_All
88	Unigene15344_All	1.796	1.616	1.706	up	21	Unigene1948_All	0.708	0.926	0.817	down	88	Unigene12957_All	2.581	2.604	2.5925	up	21	CL7984.Contig1_All	0.819	0.719	0.769	down		88	Unigene14715_All		88	Unigene33426_All					88	Unigene14715_All
89	CL1354.Contig4_All	1.373	1.064	1.2185	up	22	CL10233.Contig2_All	0.487	0.436	0.4615	down	89	CL11510.Contig2_All	2.523	2.562	2.5425	up	22	CL4490.Contig1_All	0.926	0.78	0.853	down		89	Unigene8363_All		89	Unigene23867_All					89	Unigene8363_All
90	CL6483.Contig1_All	2.258	1.524	1.891	up	23	CL13424.Contig1_All	0.684	0.903	0.7935	down	90	CL4448.Contig1_All	1.327	1.086	1.2065	up	23	CL7270.Contig1_All	0.61	0.964	0.787	down		90	CL9188.Contig2_All		90	CL10013.Contig1_All					90	CL9188.Contig2_All
91	CL2822.Contig1_All	1.772	1.418	1.595	up	24	CL3042.Contig1_All	0.696	0.469	0.5825	down	91	CL7247.Contig2_All	1.62	2.095	1.8575	up	24	CL9190.Contig2_All	0.641	0.94	0.7905	down		91	CL1745.Contig14_All		91	CL9854.Contig1_All					91	CL1745.Contig14_All
92	CL12212.Contig1_All	1.324	2.141	1.7325	up	25	CL3474.Contig11_All	0.796	0.917	0.8565	down	92	CL8011.Contig2_All	1.891	1.678	1.7845	up	25	CL11278.Contig2_All	0.805	0.744	0.7745	down		92	CL10762.Contig1_All		92	Unigene27507_All					92	CL10762.Contig1_All
93	CL5429.Contig1_All	2.033	1.967	2	up	26	CL9243.Contig2_All	0.444	0.411	0.4275	down	93	CL3974.Contig3_All	1.688	2.17	1.929	up	26	CL9452.Contig1_All	0.752	0.645	0.6985	down		93	CL2503.Contig2_All		93	CL5754.Contig1_All					93	CL2503.Contig2_All
94	CL4650.Contig3_All	1.38	1.386	1.383	up	27	Unigene20192_All	0.596	0.726	0.661	down	94	CL11706.Contig1_All	1.608	1.381	1.4945	up	27	CL1080.Contig1_All	0.522	0.6	0.561	down		94	CL4390.Contig1_All		94	CL11506.Contig1_All					94	CL4390.Contig1_All
95	CL11723.Contig1_All	1.22	1.579	1.3995	up	28	Unigene23764_All	0.656	0.595	0.6255	down	95	CL10361.Contig1_All	2.178	2.167	2.1725	up	28	CL12173.Contig1_All	0.573	0.625	0.599	down		95	Unigene5696_All		95	CL379.Contig2_All					95	Unigene5696_All
96	CL12700.Contig1_All	1.66	1.13	1.395	up	29	CL8613.Contig1_All	0.797	0.886	0.8415	down	96	Unigene8360_All	2.148	1.469	1.8085	up	29	CL6583.Contig1_All	0.665	0.616	0.6405	down		96	CL4590.Contig1_All		96	Unigene827_All					96	CL4590.Contig1_All
97	CL4684.Contig2_All	1.465	1.498	1.4815	up	30	CL4603.Contig2_All	0.777	0.681	0.729	down	97	CL8839.Contig1_All	1.496	1.88	1.688	up	30	Unigene8930_All	0.948	0.757	0.8525	down		97	CL5086.Contig1_All		97	CL6434.Contig1_All					97	CL5086.Contig1_All
98	CL1976.Contig2_All	6.075	25995.1	13000.6	up	31	CL4504.Contig1_All	0.974	0.502	0.738	down	1	CL2867.Contig1_All	0.668	0.51	0.589	down	31	CL7530.Contig1_All	0.578	0.483	0.5305	down		98	Unigene14922_All		98	CL7028.Contig2_All					98	Unigene14922_All
99	CL8389.Contig1_All	2.539	1.867	2.203	up	32	CL5472.Contig1_All	0.67	0.566	0.618	down	2	Unigene29780_All	0.503	0.434	0.4685	down	32	CL1976.Contig1_All	0.601	0.457	0.529	down		99	CL6718.Contig1_All		99	CL11279.Contig1_All					99	CL6718.Contig1_All
100	Unigene31051_All	2.202	1.518	1.86	up	33	Unigene1547_All	0.578	0.698	0.638	down	3	Unigene29478_All	0.833	0.818	0.8255	down	33	CL9623.Contig1_All	0.649	0.641	0.645	down		100	CL3526.Contig3_All		100	CL896.Contig2_All					100	CL3526.Contig3_All
101	CL9265.Contig1_All	2.273	2.005	2.139	up	34	Unigene11415_All	0.525	0.761	0.643	down	4	CL2160.Contig1_All	0.456	0.244	0.35	down	34	CL9595.Contig3_All	0.877	0.764	0.8205	down		101	Unigene5629_All		101	CL13905.Contig1_All					101	Unigene5629_All
102	CL5153.Contig2_All	1.326	1.481	1.4035	up	35	CL2637.Contig1_All	0.934	0.658	0.796	down	5	CL4542.Contig10_All	0.319	0.176	0.2475	down	35	CL558.Contig13_All	0.714	0.56	0.637	down		102	Unigene8930_All		102	Unigene25931_All					102	Unigene8930_All
103	Unigene336_All	1.714	1.34	1.527	up	36	CL12059.Contig1_All	0.501	0.839	0.67	down	6	CL77.Contig4_All	0.47	0.777	0.6235	down	36	Unigene27615_All	0.571	0.816	0.6935	down		103	CL4130.Contig10_All		103	Unigene31090_All					103	CL4130.Contig10_All
104	Unigene30078_All	1.525	1.993	1.759	up	37	CL5894.Contig1_All	0.703	0.652	0.6775	down	7	Unigene1977_All	0.757	0.803	0.78	down	37	CL495.Contig1_All	0.791	0.761	0.776	down		104	CL3901.Contig5_All		104	CL11145.Contig1_All					104	CL3901.Contig5_All
105	CL10607.Contig1_All	1.29	1.098	1.194	up	38	CL2825.Contig1_All	0.814	0.683	0.7485	down	8	CL5646.Contig1_All	0.348	0.216	0.282	down	38	CL2093.Contig1_All	0.975	0.791	0.883	down		105	Unigene22945_All		105	CL3441.Contig2_All					105	Unigene22945_All
106	CL3243.Contig1_All	1.207	1.264	1.2355	up	39	Unigene23782_All	0.292	0.514	0.403	down	9	CL12053.Contig1_All	0.535	0.45	0.4925	down	39	CL11156.Contig1_All	0.383	0.456	0.4195	down		106	Unigene12540_All		106	CL5449.Contig4_All					106	Unigene12540_All
107	CL11510.Contig2_All	2.633	2.911	2.772	up	40	Unigene20234_All	0.97	0.494	0.732	down	10	CL1077.Contig2_All	0.817	0.733	0.775	down	40	CL11926.Contig1_All	0.698	0.766	0.732	down		107	CL9623.Contig1_All		107	CL11865.Contig2_All					107	CL9623.Contig1_All
108	Unigene13096_All	2.335	4.912	3.6235	up	41	CL4999.Contig1_All	0.711	0.771	0.741	down	11	Unigene27480_All	0.783	0.491	0.637	down	41	CL5323.Contig1_All	0.984	0.776	0.88	down		108	CL9595.Contig3_All		108	CL13654.Contig1_All					108	CL9595.Contig3_All
109	CL4448.Contig1_All	1.579	1.54	1.5595	up	42	CL496.Contig3_All	0.464	0.515	0.4895	down	12	CL8173.Contig1_All	0.571	0.749	0.66	down	42	CL106.Contig11_All	0.777	0.596	0.6865	down		109	CL5594.Contig1_All		109	Unigene362_All					109	CL5594.Contig1_All
110	CL8011.Contig2_All	2.054	1.291	1.6725	up	43	CL12527.Contig2_All	0.564	0.659	0.6115	down	13	Unigene5128_All	0.634	0.71	0.672	down	43	Unigene13008_All	0.808	0.716	0.762	down		110	CL2093.Contig1_All		110	CL5407.Contig10_All					110	CL2093.Contig1_All
111	Unigene19715_All	1.535	1.763	1.649	up	44	Unigene31095_All	0.561	0.48	0.5205	down	14	CL7404.Contig1_All	0.558	0.407	0.4825	down	44	Unigene15357_All	0.831	0.782	0.8065	down		111	CL12382.Contig1_All		111	CL13452.Contig3_All					111	CL12382.Contig1_All
112	Unigene5139_All	1.266	1.166	1.216	up	45	CL5170.Contig2_All	0.611	0.721	0.666	down	15	CL12256.Contig1_All	0.688	0.711	0.6995	down	45	CL12646.Contig1_All	0.8	0.801	0.8005	down		112	CL703.Contig5_All		112	CL8803.Contig2_All					112	CL703.Contig5_All
113	CL439.Contig1_All	8.983	3.586	6.2845	up	46	Unigene30260_All	0.759	0.717	0.738	down	16	Unigene27577_All	0.415	0.401	0.408	down	46	Unigene1837_All	0.611	0.696	0.6535	down		113	CL3933.Contig1_All		113	Unigene23275_All					113	CL3933.Contig1_All
1	CL2867.Contig1_All	0.669	0.644	0.6565	down	47	CL1900.Contig1_All	0.41	0.586	0.498	down	17	CL8143.Contig1_All	0.734	0.759	0.7465	down	47	CL9462.Contig1_All	0.626	0.843	0.7345	down		114	CL11239.Contig2_All		114	CL12372.Contig5_All					114	CL11239.Contig2_All
2	Unigene7821_All	0.605	0.746	0.6755	down	48	CL10897.Contig2_All	0.41	0.652	0.531	down	18	CL4391.Contig1_All	0.74	0.64	0.69	down	48	CL496.Contig2_All	0.673	0.842	0.7575	down		115	CL5677.Contig10_All		115	CL6167.Contig1_All					115	CL5677.Contig10_All
3	CL9057.Contig1_All	0.66	0.898	0.779	down	49	CL1354.Contig4_All	0.639	0.599	0.619	down	19	CL3436.Contig2_All	0.202	0.363	0.2825	down	49	Unigene27512_All	0.846	0.786	0.816	down		116	CL1124.Contig1_All		116	CL8579.Contig3_All					116	CL1124.Contig1_All
4	Unigene30572_All	0.685	0.943	0.814	down	50	CL3120.Contig2_All	0.507	0.755	0.631	down	20	Unigene20359_All	0.533	0.42	0.4765	down	50	Unigene50434_All	0.601	0.661	0.631	down		117	CL6936.Contig1_All		117	CL10233.Contig2_All					117	CL6936.Contig1_All
5	Unigene29478_All	0.674	0.557	0.6155	down	51	CL5429.Contig1_All	0.786	0.949	0.8675	down	21	CL10500.Contig1_All	0.402	0.357	0.3795	down	51	Unigene4946_All	0.655	0.73	0.6925	down		118	Unigene30358_All		118	CL13424.Contig1_All					118	Unigene30358_All
6	CL2160.Contig1_All	0.277	0.38	0.3285	down	52	CL4120.Contig10_All	0.486	0.447	0.4665	down	22	CL7270.Contig1_All	0.274	0.241	0.2575	down	52	CL10288.Contig1_All	0.773	0.783	0.778	down		119	CL6819.Contig3_All		119	Unigene7404_All					119	CL6819.Contig3_All
7	CL77.Contig4_All	0.453	0.55	0.5015	down	53	CL606.Contig1_All	0.331	0.632	0.4815	down	23	Unigene31063_All	0.355	0.536	0.4455	down	53	Unigene8906_All	0.447	0.609	0.528	down		120	CL10437.Contig1_All		120	CL9108.Contig1_All					120	CL10437.Contig1_All
8	CL5646.Contig1_All	0.503	0.431	0.467	down	54	CL5153.Contig2_All	0.621	0.795	0.708	down	24	CL7006.Contig1_All	0.282	0.524	0.403	down	54	CL7680.Contig1_All	0.658	0.838	0.748	down		121	CL106.Contig11_All		121	CL12594.Contig1_All					121	CL106.Contig11_All
9	CL12053.Contig1_All	0.389	0.571	0.48	down	55	Unigene9539_All	0.769	0.737	0.753	down	25	CL11861.Contig1_All	0.76	0.55	0.655	down	55	CL9135.Contig1_All	0.673	0.729	0.701	down		122	Unigene20220_All		122	Unigene2142_All					122	Unigene20220_All
10	CL1714.Contig6_All	0.583	0.676	0.6295	down	56	CL2738.Contig1_All	0.589	0.683	0.636	down	26	CL623.Contig4_All	0.578	0.422	0.5	down	56	CL13426.Contig3_All	0.353	0.27	0.3115	down		123	Unigene30991_All		123	CL5412.Contig3_All					123	Unigene30991_All
11	Unigene27480_All	0.57	0.326	0.448	down	57	CL12935.Contig1_All	0.457	0.435	0.446	down	27	CL5263.Contig7_All	0.848	0.584	0.716	down	57	CL4504.Contig1_All	0.852	0.83	0.841	down		124	CL9652.Contig2_All		124	CL9224.Contig1_All					124	CL9652.Contig2_All
12	CL3306.Contig4_All	0.522	0.442	0.482	down	58	CL11274.Contig1_All	0.842	0.778	0.81	down	28	Unigene9448_All	0.486	0.616	0.551	down	58	CL2647.Contig4_All	0.647	0.723	0.685	down		125	CL6570.Contig1_All		125	CL256.Contig2_All					125	CL6570.Contig1_All
13	CL3120.Contig1_All	0.552	0.335	0.4435	down	59	Unigene12498_All	0.505	0.887	0.696	down	29	CL4864.Contig7_All	0.894	0.542	0.718	down	59	CL6539.Contig1_All	0.686	0.691	0.6885	down		126	Unigene12334_All		126	CL4285.Contig1_All					126	Unigene12334_All
14	Unigene5128_All	0.951	0.688	0.8195	down	60	CL12271.Contig3_All	0.887	0.664	0.7755	down	30	CL4531.Contig1_All	0.867	0.586	0.7265	down	60	CL12059.Contig1_All	0.902	0.762	0.832	down		127	CL269.Contig7_All		127	CL10569.Contig2_All					127	CL269.Contig7_All
15	CL12796.Contig3_All	0.478	0.641	0.5595	down	61	CL8528.Contig2_All	0.793	0.383	0.588	down	31	CL2226.Contig1_All	0.485	0.262	0.3735	down	61	CL2646.Contig6_All	0.602	0.561	0.5815	down		128	CL13189.Contig2_All		128	CL4287.Contig13_All					128	CL13189.Contig2_All
16	CL12594.Contig3_All	0.991	0.438	0.7145	down	62	Unigene5139_All	0.317	0.353	0.335	down	32	Unigene4110_All	0.373	0.446	0.4095	down	62	CL5745.Contig1_All	0.581	0.761	0.671	down		129	CL13611.Contig1_All		129	Unigene16640_All					129	CL13611.Contig1_All
17	CL8143.Contig1_All	0.463	0.666	0.5645	down							33	Unigene23869_All	0.586	0.458	0.522	down	63	Unigene16699_All	0.681	0.7	0.6905	down		130	Unigene27582_All		130	CL4625.Contig1_All					130	Unigene27582_All
18	CL832.Contig4_All	0.721	0.647	0.684	down							34	CL7530.Contig1_All	0.701	0.803	0.752	down	64	CL7358.Contig1_All	0.849	0.755	0.802	down		131	CL496.Contig2_All		131	CL3474.Contig11_All					131	CL496.Contig2_All
19	CL3436.Contig2_All	0.299	0.4	0.3495	down							35	CL10013.Contig1_All	0.54	0.893	0.7165	down	65	Unigene13020_All	0.667	0.708	0.6875	down		132	CL6710.Contig1_All		132	Unigene30631_All					132	CL6710.Contig1_All
20	Unigene20359_All	0.603	0.761	0.682	down							36	CL9591.Contig1_All	0.538	0.719	0.6285	down	66	Unigene24193_All	0.712	0.529	0.6205	down		133	CL10395.Contig1_All		133	CL13943.Contig1_All					133	CL10395.Contig1_All
21	CL10500.Contig1_All	0.505	0.312	0.4085	down							37	Unigene827_All	0.823	0.678	0.7505	down	67	CL3159.Contig1_All	0.726	0.524	0.625	down		134	CL8141.Contig1_All		134	CL777.Contig3_All					134	CL8141.Contig1_All
22	CL7006.Contig1_All	0.695	0.841	0.768	down							38	CL11279.Contig1_All	0.448	0.653	0.5505	down	68	Unigene15344_All	0.612	0.658	0.635	down		135	CL7540.Contig1_All		135	CL9243.Contig2_All					135	CL7540.Contig1_All
23	CL623.Contig4_All	0.391	0.521	0.456	down							39	Unigene31090_All	0.69	0.637	0.6635	down	69	CL9462.Contig2_All	0.901	0.266	0.5835	down		136	CL1336.Contig2_All		136	Unigene16495_All					136	CL1336.Contig2_All
24	CL12440.Contig2_All	0.739	0.614	0.6765	down							40	CL11926.Contig1_All	0.768	0.88	0.824	down	70	CL12212.Contig1_All	0.696	0.471	0.5835	down		137	Unigene13068_All		137	Unigene8654_All					137	Unigene13068_All
25	CL5263.Contig7_All	0.925	0.695	0.81	down							41	CL13452.Contig3_All	0.629	0.703	0.666	down	71	CL5429.Contig1_All	0.811	0.79	0.8005	down		138	Unigene4946_All		138	Unigene8928_All					138	Unigene4946_All
26	Unigene20325_All	0.396	0.466	0.431	down							42	CL8803.Contig2_All	0.566	0.57	0.568	down	72	CL10469.Contig1_All	0.631	0.61	0.6205	down		139	CL2941.Contig4_All		139	Unigene34607_All					139	CL2941.Contig4_All
27	CL5646.Contig2_All	0.574	0.486	0.53	down							43	Unigene23275_All	0.814	0.426	0.62	down	73	Unigene9257_All	0.594	0.646	0.62	down		140	Unigene15094_All		140	Unigene25950_All					140	Unigene15094_All
28	Unigene9448_All	0.577	0.584	0.5805	down							44	Unigene13008_All	0.74	0.559	0.6495	down	74	CL606.Contig1_All	0.875	0.734	0.8045	down		141	CL7265.Contig1_All		141	CL5026.Contig2_All					141	CL7265.Contig1_All
29	CL10115.Contig1_All	0.589	0.646	0.6175	down							45	CL12646.Contig1_All	0.814	0.682	0.748	down	75	CL1976.Contig2_All	0.4	0.405	0.4025	down		142	CL12106.Contig1_All		142	CL7545.Contig2_All					142	CL12106.Contig1_All
30	CL4531.Contig1_All	0.799	0.397	0.598	down							46	CL10233.Contig2_All	0.365	0.413	0.389	down	76	CL8389.Contig1_All	0.464	0.709	0.5865	down		143	Unigene4957_All		143	CL5865.Contig3_All					143	CL2867.Contig1_All
31	CL2226.Contig1_All	0.498	0.479	0.4885	down							47	CL13424.Contig1_All	0.747	0.757	0.752	down	77	Unigene30358_All	0.748	0.74	0.744	down		144	CL5323.Contig3_All		144	CL7437.Contig1_All					144	Unigene15028_All
32	CL12173.Contig1_All	0.613	0.625	0.619	down							48	CL5412.Contig3_All	0.787	0.508	0.6475	down	78	Unigene30078_All	0.676	0.643	0.6595	down		145	CL7798.Contig15_All		145	CL8613.Contig1_All					145	Unigene29780_All
33	Unigene4110_All	0.472	0.526	0.499	down							49	CL9462.Contig1_All	0.231	0.062	0.1465	down	79	Unigene20220_All	0.657	0.715	0.686	down		146	CL8389.Contig4_All		146	Unigene15216_All					146	CL4922.Contig2_All
34	Unigene23869_All	0.799	0.483	0.641	down							50	Unigene25317_All	0.309	0.429	0.369	down	80	Unigene30991_All	0.556	0.513	0.5345	down		147	CL2195.Contig1_All		147	CL11683.Contig3_All					147	CL8386.Contig1_All
35	Unigene33600_All	0.908	0.448	0.678	down							51	Unigene27512_All	0.77	0.709	0.7395	down	81	Unigene13096_All	0.459	0.399	0.429	down		148	CL13862.Contig1_All		148	CL6360.Contig6_All					148	Unigene1474_All
36	CL9658.Contig1_All	0.597	0.6	0.5985	down							52	CL3474.Contig11_All	0.701	0.797	0.749	down	82	Unigene12334_All	0.699	0.674	0.6865	down		149	CL2161.Contig2_All		149	Unigene5818_All					149	CL12428.Contig2_All
37	CL9591.Contig1_All	0.436	0.593	0.5145	down							53	Unigene30631_All	0.673	0.664	0.6685	down	83	CL8958.Contig1_All	0.677	0.53	0.6035	down		150	CL2073.Contig3_All		150	CL1902.Contig1_All					150	Unigene33201_All
38	CL34.Contig1_All	0.623	0.786	0.7045	down							54	CL13943.Contig1_All	0.603	0.668	0.6355	down	84	CL13189.Contig2_All	0.925	0.569	0.747	down		151	CL6267.Contig2_All		151	CL13463.Contig1_All					151	CL4542.Contig10_All
39	Unigene31036_All	0.761	0.629	0.695	down							55	CL13300.Contig1_All	0.682	0.703	0.6925	down	85	Unigene27582_All	0.593	0.543	0.568	down		152	CL6598.Contig1_All		152	CL5208.Contig1_All					152	Unigene8915_All
40	CL12134.Contig2_All	0.775	0.875	0.825	down							56	CL9243.Contig2_All	0.255	0.262	0.2585	down	86	CL14049.Contig1_All	0.767	0.439	0.603	down		153	CL8350.Contig2_All		153	Unigene27662_All					153	CL360.Contig1_All
41	Unigene31090_All	0.515	0.556	0.5355	down							57	Unigene16495_All	0.888	0.496	0.692	down	87	CL8892.Contig1_All	0.927	0.62	0.7735	down		154	CL3793.Contig1_All		154	CL2920.Contig3_All					154	CL4622.Contig4_All
42	CL3793.Contig3_All	0.473	0.577	0.525	down							58	Unigene8928_All	0.177	0.113	0.145	down	88	CL12106.Contig1_All	0.538	0.874	0.706	down		155	CL8657.Contig1_All		155	CL4243.Contig4_All					155	Unigene8503_All
43	Unigene13710_All	0.716	0.793	0.7545	down							59	CL2648.Contig1_All	0.681	0.319	0.5	down								156	CL14228.Contig1_All		156	CL8249.Contig1_All					156	CL77.Contig4_All
44	CL13452.Contig3_All	0.534	0.613	0.5735	down							60	CL8613.Contig1_All	0.485	0.773	0.629	down								157	CL7345.Contig1_All		157	CL1777.Contig1_All					157	Unigene14615_All
45	CL8803.Contig2_All	0.58	0.636	0.608	down							61	CL8482.Contig1_All	0.534	0.636	0.585	down								158	CL10964.Contig4_All		158	CL13999.Contig2_All					158	CL532.Contig2_All
46	CL3845.Contig1_All	0.641	0.611	0.626	down							62	Unigene27662_All	0.81	0.725	0.7675	down								159	Unigene22235_All		159	CL1260.Contig3_All					159	CL5646.Contig1_All
47	Unigene5253_All	0.739	0.933	0.836	down							63	CL13999.Contig2_All	0.436	0.626	0.531	down								160	CL1080.Contig3_All		160	CL4998.Contig1_All					160	CL12053.Contig1_All
48	CL744.Contig2_All	0.012	0.664	0.338	down							64	CL1260.Contig3_All	0.814	0.61	0.712	down								161	CL11542.Contig2_All		161	CL13285.Contig1_All					161	CL1219.Contig3_All
49	Unigene15998_All	0.595	0.9	0.7475	down							65	CL4998.Contig1_All	0.281	0.578	0.4295	down								162	Unigene806_All		162	CL5323.Contig2_All					162	CL1077.Contig2_All
50	CL13424.Contig1_All	0.654	0.609	0.6315	down							66	CL13285.Contig1_All	0.509	0.907	0.708	down								163	CL13339.Contig1_All		163	CL7071.Contig2_All					163	Unigene27480_All
51	CL267.Contig4_All	0.369	0.227	0.298	down							67	CL7071.Contig2_All	0.925	0.36	0.6425	down								164	CL12131.Contig1_All		164	CL7359.Contig3_All					164	CL8173.Contig1_All
52	CL5412.Contig3_All	0.707	0.786	0.7465	down							68	CL4603.Contig2_All	0.425	0.424	0.4245	down								165	Unigene27104_All		165	CL4603.Contig2_All					165	CL9197.Contig1_All
53	CL9462.Contig1_All	0.22	0.281	0.2505	down							69	CL5472.Contig1_All	0.377	0.459	0.418	down								166	CL7817.Contig2_All		166	CL454.Contig2_All					166	CL6873.Contig3_All
54	Unigene23684_All	0.701	0.603	0.652	down							70	Unigene20343_All	0.681	0.444	0.5625	down								167	Unigene9386_All		167	CL566.Contig1_All					167	CL8373.Contig2_All
55	CL12104.Contig1_All	0.451	0.416	0.4335	down							71	Unigene1547_All	0.361	0.394	0.3775	down								168	CL9836.Contig1_All		168	CL2507.Contig5_All					168	Unigene5128_All
56	Unigene25317_All	0.233	0.304	0.2685	down							72	CL2738.Contig2_All	0.373	0.659	0.516	down								169	CL11628.Contig1_All		169	CL6078.Contig2_All					169	CL4784.Contig12_All
57	CL13943.Contig1_All	0.567	0.64	0.6035	down							73	Unigene11415_All	0.322	0.633	0.4775	down								170	Unigene27503_All		170	CL5472.Contig1_All					170	CL2330.Contig1_All
58	CL13300.Contig1_All	0.21	0.274	0.242	down							74	CL2647.Contig4_All	0.355	0.615	0.485	down								171	Unigene34799_All		171	Unigene1547_All					171	CL9137.Contig1_All
59	CL9243.Contig2_All	0.529	0.463	0.496	down							75	CL2637.Contig1_All	0.643	0.545	0.594	down								172	Unigene27487_All		172	Unigene20343_All					172	CL4279.Contig1_All
60	Unigene8928_All	0.518	0.132	0.325	down							76	CL12059.Contig1_All	0.318	0.386	0.352	down								173	CL5938.Contig2_All		173	Unigene34740_All					173	CL4548.Contig3_All
61	Unigene34200_All	0.747	0.73	0.7385	down							77	CL5304.Contig1_All	0.701	0.754	0.7275	down								174	Unigene18905_All		174	CL2738.Contig2_All					174	Unigene22014_All
62	CL6377.Contig1_All	0.702	0.923	0.8125	down							78	CL6111.Contig2_All	0.387	0.552	0.4695	down								175	CL6090.Contig1_All		175	CL3818.Contig1_All					175	CL1800.Contig12_All
63	CL2648.Contig1_All	0.493	0.388	0.4405	down							79	Unigene16699_All	0.313	0.938	0.6255	down								176	CL2317.Contig3_All		176	CL5441.Contig3_All					176	CL2199.Contig3_All
64	CL8613.Contig1_All	0.44	0.712	0.576	down							80	CL2882.Contig3_All	0.595	0.567	0.581	down								177	CL6795.Contig2_All		177	CL10475.Contig2_All					177	Unigene2147_All
65	Unigene1035_All	0.537	0.676	0.6065	down							81	Unigene23782_All	0.21	0.752	0.481	down								178	CL13667.Contig2_All		178	Unigene11415_All					178	CL8143.Contig1_All
66	CL8482.Contig1_All	0.372	0.634	0.503	down							82	Unigene20234_All	0.35	0.473	0.4115	down								179	CL12935.Contig1_All		179	CL1407.Contig1_All					179	Unigene27577_All
67	CL13999.Contig2_All	0.551	0.631	0.591	down							83	CL8708.Contig4_All	0.31	0.331	0.3205	down								180	CL8711.Contig1_All		180	CL1883.Contig4_All					180	CL6298.Contig4_All
68	CL4998.Contig1_All	0.289	0.396	0.3425	down							84	CL1298.Contig2_All	0.696	0.836	0.766	down								181	CL7844.Contig1_All		181	CL5304.Contig1_All					181	CL1401.Contig1_All
69	CL7071.Contig2_All	0.569	0.554	0.5615	down							85	CL10786.Contig2_All	0.558	0.418	0.488	down								182	CL4934.Contig6_All		182	CL12216.Contig1_All					182	CL9831.Contig1_All
70	CL6698.Contig1_All	0.626	0.666	0.646	down							86	CL759.Contig1_All	0.558	0.528	0.543	down								183	CL789.Contig2_All		183	CL5112.Contig1_All					183	CL3904.Contig1_All
71	CL4603.Contig2_All	0.666	0.558	0.612	down							87	CL3765.Contig3_All	0.476	0.398	0.437	down								184	CL10576.Contig1_All		184	CL131.Contig1_All					184	Unigene20207_All
72	CL5472.Contig1_All	0.758	0.72	0.739	down							88	CL1987.Contig1_All	0.633	0.7	0.6665	down								185	CL13279.Contig2_All		185	CL6122.Contig8_All					185	CL4391.Contig1_All
73	Unigene20343_All	0.567	0.634	0.6005	down							89	CL1900.Contig1_All	0.323	0.429	0.376	down								186	CL609.Contig3_All		186	Unigene23820_All					186	CL11390.Contig1_All
74	Unigene1547_All	0.679	0.527	0.603	down							90	CL10897.Contig2_All	0.293	0.335	0.314	down								187	Unigene5148_All		187	CL8365.Contig2_All					187	CL103.Contig1_All
75	CL2738.Contig2_All	0.574	0.723	0.6485	down							91	CL9462.Contig2_All	0.231	0.341	0.286	down								188	Unigene34235_All		188	Unigene33184_All					188	Unigene23773_All
76	CL8382.Contig1_All	0.571	0.536	0.5535	down							92	Unigene15253_All	0.196	0.333	0.2645	down								189	CL10735.Contig1_All		189	CL9395.Contig1_All					189	CL10468.Contig3_All
77	Unigene11415_All	0.634	0.684	0.659	down							93	CL4120.Contig10_All	0.38	0.295	0.3375	down								190	Unigene22979_All		190	Unigene34756_All					190	CL13512.Contig1_All
78	CL7996.Contig2_All	0.452	0.359	0.4055	down							94	CL606.Contig1_All	0.244	0.432	0.338	down								191	CL8490.Contig2_All		191	CL3146.Contig3_All					191	Unigene13013_All
79	CL2647.Contig4_All	0.717	0.766	0.7415	down							95	Unigene9539_All	0.587	0.629	0.608	down								192	CL12271.Contig3_All		192	CL6111.Contig2_All					192	CL4101.Contig1_All
80	CL2637.Contig1_All	0.547	0.64	0.5935	down							96	CL2738.Contig1_All	0.623	0.426	0.5245	down								193	CL7996.Contig2_All		193	CL8176.Contig1_All					193	Unigene12536_All
81	CL12059.Contig1_All	0.529	0.607	0.568	down							97	CL11274.Contig1_All	0.679	0.608	0.6435	down								194	Unigene23196_All		194	CL2825.Contig1_All					194	CL7992.Contig2_All
82	CL5304.Contig1_All	0.659	0.553	0.606	down							98	CL2207.Contig2_All	0.088	0.435	0.2615	down								195	CL11294.Contig2_All		195	CL1558.Contig1_All					195	Unigene1979_All
83	CL3930.Contig1_All	0.599	0.947	0.773	down							99	CL5778.Contig3_All	0.746	0.528	0.637	down								196	CL11063.Contig2_All		196	CL5761.Contig1_All					196	CL10500.Contig1_All
84	CL6050.Contig2_All	0.774	0.6	0.687	down							100	Unigene12498_All	0.626	0.558	0.592	down								197	CL2669.Contig3_All		197	CL8818.Contig2_All					197	Unigene34251_All
85	CL12981.Contig1_All	0.376	0.397	0.3865	down							101	CL12428.Contig3_All	0.658	0.549	0.6035	down								198	CL13944.Contig1_All		198	CL1718.Contig1_All					198	Unigene9375_All
86	Unigene23782_All	0.547	0.649	0.598	down							102	CL8528.Contig2_All	0.7	0.276	0.488	down								199	CL10962.Contig2_All		199	CL5865.Contig2_All					199	Unigene1651_All
87	Unigene20234_All	0.548	0.645	0.5965	down							103	CL2057.Contig1_All	0.2	0.622	0.411	down								200	CL12132.Contig1_All		200	Unigene20234_All					200	Unigene5656_All
88	CL11147.Contig1_All	0.581	0.984	0.7825	down							104	Unigene5139_All	0.561	0.35	0.4555	down								201	CL10233.Contig1_All		201	CL8708.Contig4_All					201	CL12138.Contig2_All
89	CL3793.Contig1_All	0.461	0.584	0.5225	down																				202	Unigene19720_All		202	CL8795.Contig2_All					202	CL5520.Contig2_All
90	CL1298.Contig2_All	0.963	0.646	0.8045	down																				203	CL8397.Contig1_All		203	CL10786.Contig2_All					203	Unigene9399_All
91	CL10786.Contig2_All	0.609	0.649	0.629	down																				204	CL13044.Contig2_All		204	CL759.Contig1_All					204	CL5494.Contig1_All
92	CL6429.Contig1_All	0.568	0.528	0.548	down																				205	Unigene34788_All		205	CL12985.Contig1_All					205	CL10043.Contig1_All
93	CL11259.Contig2_All	0.677	0.722	0.6995	down																				206	Unigene5498_All		206	CL3164.Contig1_All					206	Unigene31063_All
94	CL609.Contig3_All	0.509	0.943	0.726	down																				207	Unigene5666_All		207	CL6052.Contig4_All					207	CL12437.Contig4_All
95	CL12527.Contig2_All	0.774	0.809	0.7915	down																				208	CL14005.Contig2_All		208	CL7094.Contig1_All					208	Unigene13113_All
96	CL3765.Contig3_All	0.649	0.652	0.6505	down																				209	CL6315.Contig1_All		209	CL3765.Contig3_All					209	CL9665.Contig1_All
97	CL8874.Contig1_All	0.744	0.834	0.789	down																				210	CL5412.Contig5_All		210	CL13489.Contig1_All					210	CL7006.Contig1_All
98	Unigene30260_All	0.326	0.562	0.444	down																				211	Unigene23684_All		211	CL7748.Contig2_All					211	CL11861.Contig1_All
99	CL1900.Contig1_All	0.437	0.541	0.489	down																				212	CL10938.Contig1_All		212	CL4105.Contig3_All					212	CL623.Contig4_All
100	CL10897.Contig2_All	0.266	0.349	0.3075	down																				213	CL465.Contig2_All		213	Unigene20173_All					213	CL1336.Contig1_All
101	CL4138.Contig1_All	0.529	0.511	0.52	down																				214	CL6949.Contig1_All		214	Unigene5176_All					214	Unigene27229_All
102	CL9462.Contig2_All	0.212	0.828	0.52	down																				215	Unigene16508_All		215	Unigene16555_All					215	Unigene12023_All
103	Unigene15253_All	0.244	0.508	0.376	down																				216	CL3120.Contig2_All		216	CL11456.Contig1_All					216	CL5263.Contig7_All
104	CL762.Contig2_All	0.643	0.727	0.685	down																				217	CL12720.Contig1_All		217	CL1987.Contig1_All					217	CL10237.Contig1_All
105	CL12132.Contig1_All	0.463	0.608	0.5355	down																				218	CL11536.Contig2_All		218	CL2582.Contig9_All					218	Unigene9448_All
106	Unigene13093_All	0.687	0.649	0.668	down																				219	CL9057.Contig1_All		219	CL6111.Contig1_All					219	Unigene15359_All
107	CL7105.Contig1_All	0.905	0.643	0.774	down																				220	CL11536.Contig3_All		220	CL8988.Contig2_All					220	CL4864.Contig7_All
108	Unigene9539_All	0.782	0.727	0.7545	down																				221	CL6050.Contig2_All		221	CL4287.Contig2_All					221	CL12692.Contig3_All
109	CL7738.Contig3_All	0.56	0.672	0.616	down																				222	CL13735.Contig2_All		222	CL1900.Contig1_All					222	CL10968.Contig1_All
110	CL2738.Contig1_All	0.702	0.63	0.666	down																				223	CL3287.Contig3_All		223	Unigene22118_All					223	CL2226.Contig1_All
111	CL11274.Contig1_All	0.553	0.588	0.5705	down																				224	Unigene5722_All		224	Unigene15253_All					224	CL6665.Contig1_All
112	CL2033.Contig1_All	0.626	0.438	0.532	down																				225	Unigene33600_All		225	CL11393.Contig2_All					225	CL3007.Contig1_All
113	CL13279.Contig2_All	0.504	0.506	0.505	down																				226	CL5153.Contig1_All		226	CL2130.Contig5_All					226	Unigene4110_All
114	Unigene30639_All	0.951	0.753	0.852	down																				227	CL8321.Contig2_All		227	CL9697.Contig1_All					227	Unigene23869_All
115	CL5710.Contig2_All	0.494	0.439	0.4665	down																				228	CL11670.Contig1_All		228	CL13021.Contig1_All					228	CL11323.Contig2_All
116	CL8711.Contig1_All	0.745	0.46	0.6025	down																				229	Unigene34200_All		229	CL2822.Contig1_All					229	Unigene2646_All
117	Unigene12498_All	0.899	0.603	0.751	down																				230	CL7791.Contig1_All		230	Unigene31120_All					230	Unigene33426_All
118	CL11786.Contig1_All	0.646	0.564	0.605	down																				231	CL4999.Contig1_All		231	CL125.Contig10_All					231	Unigene23867_All
119	CL12428.Contig3_All	0.737	0.665	0.701	down																				232	Unigene34667_All		232	CL4520.Contig2_All					232	CL10013.Contig1_All
120	Unigene8812_All	0.005	0.726	0.3655	down																				233	CL873.Contig3_All		233	CL2203.Contig1_All					233	CL9854.Contig1_All
																									234	Unigene31095_All		234	CL4120.Contig10_All					234	Unigene27507_All
																									235	CL8763.Contig1_All		235	CL4792.Contig1_All					235	CL5754.Contig1_All
																									236	CL5416.Contig1_All		236	CL4427.Contig1_All					236	CL11506.Contig1_All
																									237	CL11494.Contig1_All		237	CL11723.Contig1_All					237	CL379.Contig2_All
																									238	CL77.Contig7_All		238	CL8377.Contig10_All					238	Unigene827_All
																									239	CL813.Contig4_All		239	CL1382.Contig1_All					239	CL6434.Contig1_All
																									240	CL3591.Contig2_All		240	CL6767.Contig1_All					240	CL7028.Contig2_All
																									241	CL8365.Contig1_All		241	CL6740.Contig4_All					241	CL11279.Contig1_All
																									242	CL8546.Contig1_All		242	CL5516.Contig1_All					242	CL896.Contig2_All
																									243	CL4766.Contig1_All		243	CL6308.Contig2_All					243	CL13905.Contig1_All
																									244	Unigene1035_All		244	CL1396.Contig1_All					244	Unigene25931_All
																									245	CL1354.Contig4_All		245	Unigene31051_All					245	Unigene31090_All
																									246	Unigene34303_All		246	Unigene4447_All					246	CL11145.Contig1_All
																									247	CL10103.Contig2_All		247	Unigene1259_All					247	CL3441.Contig2_All
																									248	Unigene20175_All		248	Unigene9539_All					248	CL5449.Contig4_All
																									249	CL8408.Contig2_All		249	Unigene12957_All					249	CL11865.Contig2_All
																									250	CL10903.Contig1_All		250	CL13371.Contig2_All					250	CL13654.Contig1_All
																									251	Unigene30572_All		251	Unigene34700_All					251	Unigene362_All
																									252	CL12250.Contig1_All		252	CL8104.Contig1_All					252	CL5407.Contig10_All
																									253	CL11259.Contig2_All		253	CL2738.Contig1_All					253	CL13452.Contig3_All
																									254	Unigene15749_All		254	CL2359.Contig2_All					254	CL8803.Contig2_All
																									255	Unigene27466_All		255	CL1745.Contig10_All					255	Unigene23275_All
																									256	CL12134.Contig2_All		256	CL11274.Contig1_All					256	CL12372.Contig5_All
																									257	Unigene31036_All		257	CL12596.Contig1_All					257	CL6167.Contig1_All
																									258	CL4684.Contig2_All		258	CL2207.Contig2_All					258	CL8579.Contig3_All
																									259	CL7895.Contig2_All		259	CL11510.Contig2_All					259	CL10233.Contig2_All
																									260	CL6945.Contig2_All		260	CL5463.Contig2_All					260	CL13424.Contig1_All
																									261	CL4650.Contig3_All		261	CL5710.Contig2_All					261	Unigene7404_All
																									262	CL12297.Contig1_All		262	CL4448.Contig1_All					262	CL9108.Contig1_All
																									263	CL7035.Contig2_All		263	CL7247.Contig2_All					263	CL12594.Contig1_All
																									264	CL55.Contig2_All		264	CL5778.Contig3_All					264	Unigene2142_All
																									265	CL11824.Contig1_All		265	CL8103.Contig1_All					265	CL5412.Contig3_All
																									266	Unigene8191_All		266	Unigene12498_All					266	CL9224.Contig1_All
																									267	CL8381.Contig2_All		267	CL11706.Contig1_All					267	CL256.Contig2_All
																									268	Unigene2023_All		268	CL12428.Contig3_All					268	CL4285.Contig1_All
																									269	CL5170.Contig2_All		269	Unigene12520_All					269	CL10569.Contig2_All
																									270	Unigene969_All		270	Unigene8812_All					270	CL4287.Contig13_All
																									271	CL7987.Contig3_All		271	CL8528.Contig2_All					271	Unigene16640_All
																									272	CL10067.Contig1_All		272	CL2057.Contig1_All					272	CL4625.Contig1_All
																									273	Unigene9575_All		273	CL10564.Contig1_All					273	CL3474.Contig11_All
																									274	CL722.Contig1_All		274	Unigene8360_All					274	Unigene30631_All
																									275	CL5734.Contig1_All		275	Unigene5139_All					275	CL13943.Contig1_All
																									276	CL832.Contig5_All		276	CL8839.Contig1_All					276	CL777.Contig3_All
																									277	CL1976.Contig3_All		277	Unigene4957_All					277	CL9243.Contig2_All
																									278	CL7195.Contig2_All		278	CL5323.Contig3_All					278	Unigene16495_All
																									279	CL3761.Contig1_All		279	CL7798.Contig15_All					279	Unigene8654_All
																									280	CL1260.Contig2_All		280	CL8389.Contig4_All					280	Unigene8928_All
																									281	CL439.Contig1_All		281	CL2195.Contig1_All					281	Unigene34607_All
																									282	CL11744.Contig2_All		282	CL13862.Contig1_All					282	Unigene25950_All
																									283	CL1203.Contig1_All		283	CL2161.Contig2_All					283	CL5026.Contig2_All
																									284	CL12696.Contig2_All		284	CL2073.Contig3_All					284	CL7545.Contig2_All
																									285	CL2384.Contig2_All		285	CL6267.Contig2_All					285	CL5865.Contig3_All
																									286	CL2039.Contig3_All		286	CL6598.Contig1_All					286	CL7437.Contig1_All
																									287	Unigene6398_All		287	CL8350.Contig2_All					287	CL8613.Contig1_All
																									288	CL8691.Contig1_All		288	CL3793.Contig1_All					288	Unigene15216_All
																									289	CL1002.Contig3_All		289	CL8657.Contig1_All					289	CL11683.Contig3_All
																									290	CL4938.Contig1_All		290	CL14228.Contig1_All					290	CL6360.Contig6_All
																									291	Unigene30321_All		291	CL7345.Contig1_All					291	Unigene5818_All
																									292	CL11462.Contig1_All		292	CL10964.Contig4_All					292	CL1902.Contig1_All
																									293	CL11877.Contig1_All		293	Unigene22235_All					293	CL13463.Contig1_All
																									294	CL2720.Contig1_All		294	CL1080.Contig3_All					294	CL5208.Contig1_All
																									295	CL6598.Contig3_All		295	CL11542.Contig2_All					295	Unigene27662_All
																									296	Unigene11695_All		296	Unigene806_All					296	CL2920.Contig3_All
																									297	CL13442.Contig2_All		297	CL13339.Contig1_All					297	CL4243.Contig4_All
																									298	CL10607.Contig1_All		298	CL12131.Contig1_All					298	CL8249.Contig1_All
																									299	CL9218.Contig2_All		299	Unigene27104_All					299	CL1777.Contig1_All
																									300	Unigene6346_All		300	CL7817.Contig2_All					300	CL13999.Contig2_All
																									301	Unigene19682_All		301	Unigene9386_All					301	CL1260.Contig3_All
																									302	CL2387.Contig1_All		302	CL9836.Contig1_All					302	CL4998.Contig1_All
																									303	CL7064.Contig2_All		303	CL11628.Contig1_All					303	CL13285.Contig1_All
																									304	CL5268.Contig1_All		304	Unigene27503_All					304	CL5323.Contig2_All
																									305	CL8810.Contig1_All		305	Unigene34799_All					305	CL7071.Contig2_All
																									306	CL8874.Contig1_All		306	Unigene27487_All					306	CL7359.Contig3_All
																									307	Unigene11393_All		307	CL5938.Contig2_All					307	CL4603.Contig2_All
																									308	CL12529.Contig2_All		308	Unigene18905_All					308	CL454.Contig2_All
																									309	Unigene12971_All		309	CL6090.Contig1_All					309	CL566.Contig1_All
																									310	CL3186.Contig1_All		310	CL2317.Contig3_All					310	CL2507.Contig5_All
																									311	CL594.Contig1_All		311	CL6795.Contig2_All					311	CL6078.Contig2_All
																									312	Unigene11865_All		312	CL13667.Contig2_All					312	CL5472.Contig1_All
																									313	Unigene13093_All		313	CL12935.Contig1_All					313	Unigene1547_All
																									314	CL6002.Contig3_All		314	CL8711.Contig1_All					314	Unigene20343_All
																									315	CL8579.Contig1_All		315	CL7844.Contig1_All					315	Unigene34740_All
																									316	CL2049.Contig1_All		316	CL4934.Contig6_All					316	CL2738.Contig2_All
																									317	Unigene9524_All		317	CL789.Contig2_All					317	CL3818.Contig1_All
																									318	Unigene18713_All		318	CL10576.Contig1_All					318	CL5441.Contig3_All
																									319	CL3200.Contig3_All		319	CL13279.Contig2_All					319	CL10475.Contig2_All
																									320	Unigene13710_All		320	CL609.Contig3_All					320	Unigene11415_All
																									321	Unigene27060_All		321	Unigene5148_All					321	CL1407.Contig1_All
																									322	Unigene30937_All		322	Unigene34235_All					322	CL1883.Contig4_All
																									323	CL7105.Contig1_All		323	CL10735.Contig1_All					323	CL5304.Contig1_All
																									324	CL1518.Contig1_All		324	Unigene22979_All					324	CL12216.Contig1_All
																									325	CL10935.Contig1_All		325	CL8490.Contig2_All					325	CL5112.Contig1_All
																									326	CL10394.Contig3_All		326	CL12271.Contig3_All					326	CL131.Contig1_All
																									327	CL3146.Contig2_All		327	CL7996.Contig2_All					327	CL6122.Contig8_All
																									328	CL735.Contig1_All		328	Unigene23196_All					328	Unigene23820_All
																									329	Unigene5006_All		329	CL11294.Contig2_All					329	CL8365.Contig2_All
																									330	Unigene33997_All		330	CL11063.Contig2_All					330	Unigene33184_All
																									331	CL6620.Contig2_All		331	CL2669.Contig3_All					331	CL9395.Contig1_All
																									332	Unigene19715_All		332	CL13944.Contig1_All					332	Unigene34756_All
																									333	CL6698.Contig1_All		333	CL10962.Contig2_All					333	CL3146.Contig3_All
																									334	CL9804.Contig2_All		334	CL12132.Contig1_All					334	CL6111.Contig2_All
																									335	CL3042.Contig1_All		335	CL10233.Contig1_All					335	CL8176.Contig1_All
																									336	CL496.Contig3_All		336	Unigene19720_All					336	CL2825.Contig1_All
																									337	CL8190.Contig1_All		337	CL8397.Contig1_All					337	CL1558.Contig1_All
																									338	CL3197.Contig1_All		338	CL13044.Contig2_All					338	CL5761.Contig1_All
																									339	CL13184.Contig2_All		339	Unigene34788_All					339	CL8818.Contig2_All
																									340	CL899.Contig10_All		340	Unigene5498_All					340	CL1718.Contig1_All
																									341	CL266.Contig3_All		341	Unigene5666_All					341	CL5865.Contig2_All
																									342	CL5153.Contig2_All		342	CL14005.Contig2_All					342	Unigene20234_All
																									343	CL34.Contig1_All		343	CL6315.Contig1_All					343	CL8708.Contig4_All
																									344	CL8402.Contig5_All		344	CL5412.Contig5_All					344	CL8795.Contig2_All
																									345	CL1734.Contig1_All		345	Unigene23684_All					345	CL10786.Contig2_All
																									346	Unigene20365_All		346	CL10938.Contig1_All					346	CL759.Contig1_All
																									347	CL8699.Contig3_All		347	CL465.Contig2_All					347	CL12985.Contig1_All
																									348	CL8438.Contig1_All		348	CL6949.Contig1_All					348	CL3164.Contig1_All
																									349	CL12545.Contig1_All		349	Unigene16508_All					349	CL6052.Contig4_All
																									350	Unigene34234_All		350	CL3120.Contig2_All					350	CL7094.Contig1_All
																									351	CL495.Contig3_All		351	CL12720.Contig1_All					351	CL3765.Contig3_All
																									352	CL12930.Contig1_All		352	CL11536.Contig2_All					352	CL13489.Contig1_All
																									353	Unigene19095_All		353	CL9057.Contig1_All					353	CL7748.Contig2_All
																									354	CL5000.Contig2_All		354	CL11536.Contig3_All					354	CL4105.Contig3_All
																									355	CL8840.Contig1_All		355	CL6050.Contig2_All					355	Unigene20173_All
																									356	Unigene30639_All		356	CL13735.Contig2_All					356	Unigene5176_All
																									357	CL7318.Contig4_All		357	CL3287.Contig3_All					357	Unigene16555_All
																									358	CL9567.Contig1_All		358	Unigene5722_All					358	CL11456.Contig1_All
																									359	CL9933.Contig1_All		359	Unigene33600_All					359	CL1987.Contig1_All
																									360	CL12624.Contig1_All		360	CL5153.Contig1_All					360	CL2582.Contig9_All
																									361	Unigene9452_All		361	CL8321.Contig2_All					361	CL6111.Contig1_All
																									362	Unigene34696_All		362	CL11670.Contig1_All					362	CL8988.Contig2_All
																									363	CL8072.Contig2_All		363	Unigene34200_All					363	CL4287.Contig2_All
																									364	CL3559.Contig2_All		364	CL7791.Contig1_All					364	CL1900.Contig1_All
																									365	CL2492.Contig2_All		365	CL4999.Contig1_All					365	Unigene22118_All
																									366	Unigene5710_All		366	Unigene34667_All					366	Unigene15253_All
																									367	CL11890.Contig2_All		367	CL873.Contig3_All					367	CL11393.Contig2_All
																									368	CL1174.Contig1_All		368	Unigene31095_All					368	CL2130.Contig5_All
																									369	Unigene14973_All		369	CL8763.Contig1_All					369	CL9697.Contig1_All
																									370	CL1839.Contig2_All		370	CL5416.Contig1_All					370	CL13021.Contig1_All
																									371	CL4684.Contig1_All		371	CL11494.Contig1_All					371	CL2822.Contig1_All
																									372	Unigene1958_All		372	CL77.Contig7_All					372	Unigene31120_All
																									373	CL6795.Contig4_All		373	CL813.Contig4_All					373	CL125.Contig10_All
																									374	Unigene27499_All		374	CL3591.Contig2_All					374	CL4520.Contig2_All
																									375	CL11419.Contig2_All		375	CL8365.Contig1_All					375	CL2203.Contig1_All
																									376	CL6028.Contig1_All		376	CL8546.Contig1_All					376	CL4120.Contig10_All
																									377	CL9335.Contig1_All		377	CL4766.Contig1_All					377	CL4792.Contig1_All
																									378	Unigene9368_All		378	Unigene1035_All					378	CL4427.Contig1_All
																									379	CL133.Contig4_All		379	CL1354.Contig4_All					379	CL11723.Contig1_All
																									380	Unigene16365_All		380	Unigene34303_All					380	CL8377.Contig10_All
																									381	CL10016.Contig1_All		381	CL10103.Contig2_All					381	CL1382.Contig1_All
																									382	CL4539.Contig3_All		382	Unigene20175_All					382	CL6767.Contig1_All
																									383	CL7765.Contig1_All		383	CL8408.Contig2_All					383	CL6740.Contig4_All
																									384	CL7386.Contig1_All		384	CL10903.Contig1_All					384	CL5516.Contig1_All
																									385	CL1714.Contig6_All		385	Unigene30572_All					385	CL6308.Contig2_All
																									386	CL2811.Contig1_All		386	CL12250.Contig1_All					386	CL1396.Contig1_All
																									387	CL4683.Contig5_All		387	CL11259.Contig2_All					387	Unigene31051_All
																									388	CL11543.Contig1_All		388	Unigene15749_All					388	Unigene4447_All
																									389	CL7048.Contig1_All		389	Unigene27466_All					389	Unigene1259_All
																									390	Unigene5824_All		390	CL12134.Contig2_All					390	Unigene9539_All
																									391	Unigene24304_All		391	Unigene31036_All					391	Unigene12957_All
																									392	Unigene12430_All		392	CL4684.Contig2_All					392	CL13371.Contig2_All
																									393	Unigene5831_All		393	CL7895.Contig2_All					393	Unigene34700_All
																									394	CL1839.Contig1_All		394	CL6945.Contig2_All					394	CL8104.Contig1_All
																									395	Unigene30754_All		395	CL4650.Contig3_All					395	CL2738.Contig1_All
																									396	CL11316.Contig1_All		396	CL12297.Contig1_All					396	CL2359.Contig2_All
																									397	CL12720.Contig2_All		397	CL7035.Contig2_All					397	CL1745.Contig10_All
																									398	CL2706.Contig3_All		398	CL55.Contig2_All					398	CL11274.Contig1_All
																									399	CL3930.Contig1_All		399	CL11824.Contig1_All					399	CL12596.Contig1_All
																									400	CL3333.Contig3_All		400	Unigene8191_All					400	CL2207.Contig2_All
																									401	CL7351.Contig1_All		401	CL8381.Contig2_All					401	CL11510.Contig2_All
																									402	Unigene2079_All		402	Unigene2023_All					402	CL5463.Contig2_All
																									403	CL4857.Contig1_All		403	CL5170.Contig2_All					403	CL5710.Contig2_All
																									404	Unigene31114_All		404	Unigene969_All					404	CL4448.Contig1_All
																									405	CL6360.Contig7_All		405	CL7987.Contig3_All					405	CL7247.Contig2_All
																									406	Unigene27575_All		406	CL10067.Contig1_All					406	CL5778.Contig3_All
																									407	CL12209.Contig2_All		407	Unigene9575_All					407	CL8103.Contig1_All
																									408	CL5377.Contig1_All		408	CL722.Contig1_All					408	Unigene12498_All
																									409	CL2730.Contig2_All		409	CL5734.Contig1_All					409	CL11706.Contig1_All
																									410	CL12982.Contig1_All		410	CL832.Contig5_All					410	CL12428.Contig3_All
																									411	CL9337.Contig1_All		411	CL1976.Contig3_All					411	Unigene12520_All
																									412	CL11652.Contig1_All		412	CL7195.Contig2_All					412	Unigene8812_All
																									413	CL1813.Contig3_All		413	CL3761.Contig1_All					413	CL8528.Contig2_All
																									414	Unigene9437_All		414	CL1260.Contig2_All					414	CL2057.Contig1_All
																									415	CL3845.Contig1_All		415	CL439.Contig1_All					415	CL10564.Contig1_All
																									416	CL6483.Contig1_All		416	CL11744.Contig2_All					416	Unigene8360_All
																									417	CL10964.Contig2_All		417	CL1203.Contig1_All					417	Unigene5139_All
																									418	CL11147.Contig1_All		418	CL12696.Contig2_All					418	CL8839.Contig1_All
																									419	Unigene5520_All		419	CL2384.Contig2_All
																									420	CL12531.Contig1_All		420	CL2039.Contig3_All
																									421	Unigene402_All		421	Unigene6398_All
																									422	CL6298.Contig1_All		422	CL8691.Contig1_All
																									423	CL11856.Contig1_All		423	CL1002.Contig3_All
																									424	CL11510.Contig3_All		424	CL4938.Contig1_All
																									425	Unigene5589_All		425	Unigene30321_All
																									426	CL4275.Contig1_All		426	CL11462.Contig1_All
																									427	CL2883.Contig4_All		427	CL11877.Contig1_All
																									428	CL5797.Contig1_All		428	CL2720.Contig1_All
																									429	CL5998.Contig1_All		429	CL6598.Contig3_All
																									430	Unigene23861_All		430	Unigene11695_All
																									431	CL13279.Contig1_All		431	CL13442.Contig2_All
																									432	CL8367.Contig1_All		432	CL10607.Contig1_All
																									433	Unigene5671_All		433	CL9218.Contig2_All
																									434	CL8445.Contig1_All		434	Unigene6346_All
																									435	CL2391.Contig1_All		435	Unigene19682_All
																									436	CL1544.Contig1_All		436	CL2387.Contig1_All
																									437	CL736.Contig1_All		437	CL7064.Contig2_All
																									438	CL6360.Contig4_All		438	CL5268.Contig1_All
																									439	CL1997.Contig11_All		439	CL8810.Contig1_All
																									440	CL4968.Contig6_All		440	CL8874.Contig1_All
																									441	Unigene16653_All		441	Unigene11393_All
																									442	CL12892.Contig1_All		442	CL12529.Contig2_All
																									443	CL6774.Contig3_All		443	Unigene12971_All
																									444	Unigene1948_All		444	CL3186.Contig1_All
																									445	CL10958.Contig3_All		445	CL594.Contig1_All
																									446	CL3021.Contig3_All		446	Unigene11865_All
																									447	CL6031.Contig1_All		447	Unigene13093_All
																									448	Unigene19764_All		448	CL6002.Contig3_All
																									449	CL7417.Contig1_All		449	CL8579.Contig1_All
																									450	CL1201.Contig3_All		450	CL2049.Contig1_All
																									451	CL13952.Contig2_All		451	Unigene9524_All
																									452	Unigene34733_All		452	Unigene18713_All
																									453	Unigene31148_All		453	CL3200.Contig3_All
																									454	CL5721.Contig2_All		454	Unigene13710_All
																									455	CL12679.Contig1_All		455	Unigene27060_All
																									456	CL3243.Contig1_All		456	Unigene30937_All
																									457	CL3154.Contig1_All		457	CL7105.Contig1_All
																									458	CL11279.Contig2_All		458	CL1518.Contig1_All
																									459	CL13839.Contig1_All		459	CL10935.Contig1_All
																									460	CL5507.Contig2_All		460	CL10394.Contig3_All
																									461	Unigene12295_All		461	CL3146.Contig2_All
																									462	CL12071.Contig1_All		462	CL735.Contig1_All
																									463	Unigene34819_All		463	Unigene5006_All
																									464	CL5728.Contig4_All		464	Unigene33997_All
																									465	CL10439.Contig1_All		465	CL6620.Contig2_All
																									466	CL13261.Contig1_All		466	Unigene19715_All
																									467	Unigene336_All		467	CL6698.Contig1_All
																									468	Unigene11648_All		468	CL9804.Contig2_All
																									469	CL7247.Contig3_All		469	CL3042.Contig1_All
																									470	CL2647.Contig2_All		470	CL496.Contig3_All
																									471	CL558.Contig11_All		471	CL8190.Contig1_All
																									472	CL10564.Contig2_All		472	CL3197.Contig1_All
																									473	Unigene25908_All		473	CL13184.Contig2_All
																									474	CL8649.Contig1_All		474	CL899.Contig10_All
																									475	CL12278.Contig3_All		475	CL266.Contig3_All
																									476	CL2634.Contig11_All		476	CL5153.Contig2_All
																									477	CL4538.Contig6_All		477	CL34.Contig1_All
																									478	CL2725.Contig1_All		478	CL8402.Contig5_All
																									479	CL11519.Contig1_All		479	CL1734.Contig1_All
																									480	CL6486.Contig1_All		480	Unigene20365_All
																									481	Unigene16623_All		481	CL8699.Contig3_All
																									482	CL12700.Contig1_All		482	CL8438.Contig1_All
																									483	CL1696.Contig1_All		483	CL12545.Contig1_All
																									484	Unigene34778_All		484	Unigene34234_All
																									485	CL6213.Contig1_All		485	CL495.Contig3_All
																									486	Unigene33680_All		486	CL12930.Contig1_All
																									487	CL12249.Contig2_All		487	Unigene19095_All
																									488	CL8602.Contig1_All		488	CL5000.Contig2_All
																									489	CL9285.Contig3_All		489	CL8840.Contig1_All
																									490	CL12276.Contig3_All		490	Unigene30639_All
																									491	CL9265.Contig1_All		491	CL7318.Contig4_All
																									492	Unigene47815_All		492	CL9567.Contig1_All
																									493	CL13339.Contig2_All		493	CL9933.Contig1_All
																									494	CL9330.Contig1_All		494	CL12624.Contig1_All
																									495	CL13266.Contig1_All		495	Unigene9452_All
																									496	CL4406.Contig2_All		496	Unigene34696_All
																									497	CL3083.Contig1_All		497	CL8072.Contig2_All
																									498	CL5170.Contig3_All		498	CL3559.Contig2_All
																									499	CL3724.Contig3_All		499	CL2492.Contig2_All
																									500	CL9004.Contig2_All		500	Unigene5710_All
																									501	Unigene31224_All		501	CL11890.Contig2_All
																									502	CL4548.Contig4_All		502	CL1174.Contig1_All
																									503	CL4969.Contig10_All		503	Unigene14973_All
																									504	CL369.Contig2_All		504	CL1839.Contig2_All
																									505	Unigene420_All		505	CL4684.Contig1_All
																									506	CL2730.Contig6_All		506	Unigene1958_All
																									507	Unigene401_All		507	CL6795.Contig4_All
																									508	CL651.Contig2_All		508	Unigene27499_All
																									509	CL1481.Contig42_All		509	CL11419.Contig2_All
																									510	CL12623.Contig1_All		510	CL6028.Contig1_All
																									511	CL7815.Contig3_All		511	CL9335.Contig1_All
																									512	CL7249.Contig1_All		512	Unigene9368_All
																									513	CL3158.Contig1_All		513	CL133.Contig4_All
																									514	Unigene330_All		514	Unigene16365_All
																									515	CL11320.Contig1_All		515	CL10016.Contig1_All
																									516	CL12278.Contig2_All		516	CL4539.Contig3_All
																									517	CL753.Contig2_All		517	CL7765.Contig1_All
																									518	Unigene2158_All		518	CL7386.Contig1_All
																									519	CL8944.Contig1_All		519	CL1714.Contig6_All
																									520	CL4002.Contig14_All		520	CL2811.Contig1_All
																									521	CL13483.Contig2_All		521	CL4683.Contig5_All
																									522	Unigene22920_All		522	CL11543.Contig1_All
																									523	CL7920.Contig3_All		523	CL7048.Contig1_All
																									524	Unigene34164_All		524	Unigene5824_All
																									525	CL10113.Contig1_All		525	Unigene24304_All
																									526	Unigene2198_All		526	Unigene12430_All
																									527	Unigene34801_All		527	Unigene5831_All
																									528	CL10582.Contig2_All		528	CL1839.Contig1_All
																									529	CL2816.Contig11_All		529	Unigene30754_All
																									530	CL8856.Contig1_All		530	CL11316.Contig1_All
																									531	CL129.Contig4_All		531	CL12720.Contig2_All
																									532	CL1114.Contig2_All		532	CL2706.Contig3_All
																									533	CL1286.Contig9_All		533	CL3930.Contig1_All
																									534	Unigene5187_All		534	CL3333.Contig3_All
																									535	CL2733.Contig2_All		535	CL7351.Contig1_All
																									536	Unigene23821_All		536	Unigene2079_All
																									537	Unigene2129_All		537	CL4857.Contig1_All
																									538	CL4731.Contig1_All		538	Unigene31114_All
																									539	CL12437.Contig1_All		539	CL6360.Contig7_All
																									540	CL10817.Contig1_All		540	Unigene27575_All
																									541	Unigene1250_All		541	CL12209.Contig2_All
																									542	CL11917.Contig1_All		542	CL5377.Contig1_All
																									543	CL5646.Contig2_All		543	CL2730.Contig2_All
																									544	CL13452.Contig1_All		544	CL12982.Contig1_All
																									545	Unigene26439_All		545	CL9337.Contig1_All
																									546	Unigene9435_All		546	CL11652.Contig1_All
																									547	Unigene18798_All		547	CL1813.Contig3_All
																									548	Unigene32908_All		548	Unigene9437_All
																									549	CL5516.Contig4_All		549	CL3845.Contig1_All
																									550	CL5778.Contig1_All		550	CL6483.Contig1_All
																									551	Unigene23956_All		551	CL10964.Contig2_All
																									552	CL1694.Contig2_All		552	CL11147.Contig1_All
																									553	CL13248.Contig2_All		553	Unigene5520_All
																									554	CL6315.Contig3_All		554	CL12531.Contig1_All
																									555	CL10288.Contig2_All		555	Unigene402_All
																									556	Unigene1904_All		556	CL6298.Contig1_All
																									557	CL9259.Contig1_All		557	CL11856.Contig1_All
																									558	Unigene1042_All		558	CL11510.Contig3_All
																									559	CL6203.Contig1_All		559	Unigene5589_All
																									560	CL5824.Contig1_All		560	CL4275.Contig1_All
																									561	CL12362.Contig2_All		561	CL2883.Contig4_All
																									562	CL8535.Contig2_All		562	CL5797.Contig1_All
																									563	CL3575.Contig1_All		563	CL5998.Contig1_All
																									564	Unigene5692_All		564	Unigene23861_All
																									565	Unigene9419_All		565	CL13279.Contig1_All
																									566	CL3592.Contig1_All		566	CL8367.Contig1_All
																									567	CL13038.Contig2_All		567	Unigene5671_All
																									568	Unigene4073_All		568	CL8445.Contig1_All
																									569	CL10042.Contig1_All		569	CL2391.Contig1_All
																									570	CL13902.Contig2_All		570	CL1544.Contig1_All
																									571	CL10043.Contig2_All		571	CL736.Contig1_All
																									572	CL7318.Contig1_All		572	CL6360.Contig4_All
																									573	Unigene33653_All		573	CL1997.Contig11_All
																									574	CL10206.Contig1_All		574	CL4968.Contig6_All
																									575	CL6584.Contig1_All		575	Unigene16653_All
																									576	CL1625.Contig1_All		576	CL12892.Contig1_All
																									577	CL6937.Contig2_All		577	CL6774.Contig3_All
																									578	CL10468.Contig2_All		578	Unigene1948_All
																									579	Unigene11863_All		579	CL10958.Contig3_All
																									580	Unigene12780_All		580	CL3021.Contig3_All
																									581	CL5892.Contig4_All		581	CL6031.Contig1_All
																									582	CL2882.Contig2_All		582	Unigene19764_All
																									583	CL6986.Contig1_All		583	CL7417.Contig1_All
																									584	CL4758.Contig1_All		584	CL1201.Contig3_All
																									585	Unigene27578_All		585	CL13952.Contig2_All
																									586	CL3762.Contig1_All		586	Unigene34733_All
																									587	CL4821.Contig2_All		587	Unigene31148_All
																									588	CL3394.Contig1_All		588	CL5721.Contig2_All
																									589	CL4814.Contig1_All		589	CL12679.Contig1_All
																									590	CL2017.Contig2_All		590	CL3243.Contig1_All
																									591	Unigene10003_All		591	CL3154.Contig1_All
																									592	CL736.Contig5_All		592	CL11279.Contig2_All
																									593	CL13259.Contig1_All		593	CL13839.Contig1_All
																									594	CL678.Contig1_All		594	CL5507.Contig2_All
																									595	Unigene19658_All		595	Unigene12295_All
																									596	CL2493.Contig1_All		596	CL12071.Contig1_All
																									597	CL6348.Contig3_All		597	Unigene34819_All
																									598	CL7912.Contig2_All		598	CL5728.Contig4_All
																									599	CL2845.Contig14_All		599	CL10439.Contig1_All
																									600	CL9243.Contig1_All		600	CL13261.Contig1_All
																									601	CL12337.Contig1_All		601	Unigene336_All
																									602	CL3436.Contig3_All		602	Unigene11648_All
																									603	CL4024.Contig1_All		603	CL7247.Contig3_All
																									604	CL9644.Contig1_All		604	CL2647.Contig2_All
																									605	Unigene31219_All		605	CL558.Contig11_All
																									606	Unigene28112_All		606	CL10564.Contig2_All
																									607	CL10361.Contig3_All		607	Unigene25908_All
																									608	CL11003.Contig1_All		608	CL8649.Contig1_All
																									609	CL12701.Contig1_All		609	CL12278.Contig3_All
																									610	CL6625.Contig2_All		610	CL2634.Contig11_All
																									611	CL5756.Contig1_All		611	CL4538.Contig6_All
																									612	CL1452.Contig2_All		612	CL2725.Contig1_All
																									613	CL7427.Contig1_All		613	CL11519.Contig1_All
																									614	CL5548.Contig3_All		614	CL6486.Contig1_All
																									615	Unigene1099_All		615	Unigene16623_All
																									616	Unigene2083_All		616	CL12700.Contig1_All
																									617	CL12337.Contig2_All		617	CL1696.Contig1_All
																									618	CL6443.Contig1_All		618	Unigene34778_All
																									619	Unigene33456_All		619	CL6213.Contig1_All
																									620	CL11983.Contig2_All		620	Unigene33680_All
																									621	CL9061.Contig3_All		621	CL12249.Contig2_All
																									622	CL13560.Contig1_All		622	CL8602.Contig1_All
																									623	Unigene29472_All		623	CL9285.Contig3_All
																									624	CL4941.Contig2_All		624	CL12276.Contig3_All
																									625	CL3174.Contig3_All		625	CL9265.Contig1_All
																									626	CL6360.Contig2_All		626	Unigene47815_All
																									627	CL9949.Contig1_All		627	CL13339.Contig2_All
																									628	Unigene26282_All		628	CL9330.Contig1_All
																									629	CL226.Contig12_All		629	CL13266.Contig1_All
																									630	CL1290.Contig8_All		630	CL4406.Contig2_All
																									631	CL11070.Contig2_All		631	CL3083.Contig1_All
																									632	CL9330.Contig2_All		632	CL5170.Contig3_All
																									633	CL6284.Contig4_All		633	CL3724.Contig3_All
																									634	CL4406.Contig4_All		634	CL9004.Contig2_All
																									635	CL11506.Contig2_All		635	Unigene31224_All
																									636	Unigene4019_All		636	CL4548.Contig4_All
																									637	Unigene7424_All		637	CL4969.Contig10_All
																									638	Unigene20799_All		638	CL369.Contig2_All
																									639	CL6398.Contig2_All		639	Unigene420_All
																									640	CL13597.Contig2_All		640	CL2730.Contig6_All
																									641	Unigene30232_All		641	Unigene401_All
																									642	CL4634.Contig1_All		642	CL651.Contig2_All
																									643	CL2816.Contig2_All		643	CL1481.Contig42_All
																									644	CL3602.Contig2_All		644	CL12623.Contig1_All
																									645	CL4730.Contig1_All		645	CL7815.Contig3_All
																									646	Unigene8677_All		646	CL7249.Contig1_All
																									647	Unigene30870_All		647	CL3158.Contig1_All
																									648	CL3901.Contig2_All		648	Unigene330_All
																									649	CL5653.Contig5_All		649	CL11320.Contig1_All
																									650	CL10456.Contig2_All		650	CL12278.Contig2_All
																									651	CL4397.Contig1_All		651	CL753.Contig2_All
																									652	CL94.Contig1_All		652	Unigene2158_All
																									653	Unigene27551_All		653	CL8944.Contig1_All
																									654	CL1745.Contig4_All		654	CL4002.Contig14_All
																									655	CL3924.Contig1_All		655	CL13483.Contig2_All
																									656	CL3901.Contig1_All		656	Unigene22920_All
																									657	Unigene30369_All		657	CL7920.Contig3_All
																									658	CL12364.Contig1_All		658	Unigene34164_All
																									659	CL4009.Contig1_All		659	CL10113.Contig1_All
																									660	CL10836.Contig2_All		660	Unigene2198_All
																									661	Unigene12552_All		661	Unigene34801_All
																									662	CL2134.Contig3_All		662	CL10582.Contig2_All
																									663	Unigene33475_All		663	CL2816.Contig11_All
																									664	CL1481.Contig71_All		664	CL8856.Contig1_All
																									665	Unigene4518_All		665	CL129.Contig4_All
																									666	CL12261.Contig1_All		666	CL1114.Contig2_All
																									667	Unigene25591_All		667	CL1286.Contig9_All
																									668	CL3158.Contig2_All		668	Unigene5187_All
																									669	CL8104.Contig11_All		669	CL2733.Contig2_All
																									670	CL11320.Contig2_All		670	Unigene23821_All
																									671	Unigene20148_All		671	Unigene2129_All
																									672	Unigene18637_All		672	CL4731.Contig1_All
																									673	CL14098.Contig2_All		673	CL12437.Contig1_All
																									674	CL5112.Contig5_All		674	CL10817.Contig1_All
																									675	CL11926.Contig2_All		675	Unigene1250_All
																									676	CL7249.Contig2_All		676	CL11917.Contig1_All
																									677	CL2359.Contig1_All		677	CL5646.Contig2_All
																									678	Unigene19443_All		678	CL13452.Contig1_All
																									679	CL8988.Contig1_All		679	Unigene26439_All
																									680	CL944.Contig10_All		680	Unigene9435_All
																									681	CL4285.Contig2_All		681	Unigene18798_All
																									682	CL490.Contig5_All		682	Unigene32908_All
																									683	Unigene4912_All		683	CL5516.Contig4_All
																									684	Unigene33737_All		684	CL5778.Contig1_All
																									685	CL7201.Contig1_All		685	Unigene23956_All
																									686	CL4026.Contig3_All		686	CL1694.Contig2_All
																									687	CL354.Contig16_All		687	CL13248.Contig2_All
																									688	CL1114.Contig11_All		688	CL6315.Contig3_All
																									689	CL11565.Contig1_All		689	CL10288.Contig2_All
																									690	CL11193.Contig4_All		690	Unigene1904_All
																									691	CL2385.Contig1_All		691	CL9259.Contig1_All
																									692	Unigene34750_All		692	Unigene1042_All
																									693	Unigene22330_All		693	CL6203.Contig1_All
																									694	CL168.Contig2_All		694	CL5824.Contig1_All
																									695	CL623.Contig3_All		695	CL12362.Contig2_All
																									696	CL7920.Contig5_All		696	CL8535.Contig2_All
																									697	CL10352.Contig1_All		697	CL3575.Contig1_All
																									698	CL11470.Contig1_All		698	Unigene5692_All
																									699	CL7362.Contig4_All		699	Unigene9419_All
																									700	CL7815.Contig2_All		700	CL3592.Contig1_All
																									701	CL4002.Contig11_All		701	CL13038.Contig2_All
																									702	Unigene31043_All		702	Unigene4073_All
																									703	CL2644.Contig1_All		703	CL10042.Contig1_All
																									704	Unigene5312_All		704	CL13902.Contig2_All
																									705	CL10828.Contig1_All		705	CL10043.Contig2_All
																									706	CL12071.Contig2_All		706	CL7318.Contig1_All
																									707	CL7248.Contig3_All		707	Unigene33653_All
																									708	CL9238.Contig2_All		708	CL10206.Contig1_All
																									709	CL6793.Contig4_All		709	CL6584.Contig1_All
																									710	CL2733.Contig1_All		710	CL1625.Contig1_All
																									711	Unigene23658_All		711	CL6937.Contig2_All
																									712	Unigene315_All		712	CL10468.Contig2_All
																									713	Unigene5152_All		713	Unigene11863_All
																									714	Unigene23884_All		714	Unigene12780_All
																									715	CL10535.Contig1_All		715	CL5892.Contig4_All
																									716	CL2610.Contig6_All		716	CL2882.Contig2_All
																									717	CL5568.Contig1_All		717	CL6986.Contig1_All
																									718	CL1015.Contig1_All		718	CL4758.Contig1_All
																									719	CL8925.Contig1_All		719	Unigene27578_All
																									720	CL4731.Contig2_All		720	CL3762.Contig1_All
																									721	CL7770.Contig3_All		721	CL4821.Contig2_All
																									722	CL12437.Contig3_All		722	CL3394.Contig1_All
																									723	CL4302.Contig5_All		723	CL4814.Contig1_All
																									724	CL3397.Contig1_All		724	CL2017.Contig2_All
																									725	CL9377.Contig2_All		725	Unigene10003_All
																									726	CL3927.Contig1_All		726	CL736.Contig5_All
																									727	CL3793.Contig2_All		727	CL13259.Contig1_All
																									728	CL3120.Contig1_All		728	CL678.Contig1_All
																									729	CL10115.Contig1_All		729	Unigene19658_All
																									730	CL12104.Contig1_All		730	CL2493.Contig1_All
																									731	CL267.Contig4_All		731	CL6348.Contig3_All
																									732	Unigene27568_All		732	CL7912.Contig2_All
																									733	Unigene25785_All		733	CL2845.Contig14_All
																									734	CL3810.Contig2_All		734	CL9243.Contig1_All
																									735	CL3120.Contig8_All		735	CL12337.Contig1_All
																									736	CL1067.Contig1_All		736	CL3436.Contig3_All
																									737	CL10231.Contig2_All		737	CL4024.Contig1_All
																									738	CL12796.Contig3_All		738	CL9644.Contig1_All
																									739	CL7119.Contig2_All		739	Unigene31219_All
																									740	CL3405.Contig10_All		740	Unigene28112_All
																									741	CL1435.Contig1_All		741	CL10361.Contig3_All
																									742	Unigene5691_All		742	CL11003.Contig1_All
																									743	CL7804.Contig1_All		743	CL12701.Contig1_All
																									744	CL6389.Contig1_All		744	CL6625.Contig2_All
																									745	CL6052.Contig3_All		745	CL5756.Contig1_All
																									746	CL243.Contig10_All		746	CL1452.Contig2_All
																									747	Unigene16494_All		747	CL7427.Contig1_All
																									748	Unigene34723_All		748	CL5548.Contig3_All
																									749	CL4425.Contig2_All		749	Unigene1099_All
																									750	Unigene31163_All		750	Unigene2083_All
																									751	CL12594.Contig3_All		751	CL12337.Contig2_All
																									752	Unigene978_All		752	CL6443.Contig1_All
																									753	Unigene13015_All		753	Unigene33456_All
																									754	CL4364.Contig1_All		754	CL11983.Contig2_All
																									755	CL7508.Contig9_All		755	CL9061.Contig3_All
																									756	CL12377.Contig1_All		756	CL13560.Contig1_All
																									757	CL5671.Contig1_All		757	Unigene29472_All
																									758	CL3306.Contig4_All		758	CL4941.Contig2_All
																									759	CL2033.Contig1_All		759	CL3174.Contig3_All
																									760	CL13722.Contig1_All		760	CL6360.Contig2_All
																									761	Unigene34184_All		761	CL9949.Contig1_All
																									762	Unigene13151_All		762	Unigene26282_All
																									763	Unigene5667_All		763	CL226.Contig12_All
																									764	CL6429.Contig1_All		764	CL1290.Contig8_All
																									765	CL3530.Contig2_All		765	CL11070.Contig2_All
																									766	CL10380.Contig2_All		766	CL9330.Contig2_All
																									767	CL3793.Contig3_All		767	CL6284.Contig4_All
																									768	CL7589.Contig1_All		768	CL4406.Contig4_All
																									769	Unigene11553_All		769	CL11506.Contig2_All
																									770	CL2546.Contig1_All		770	Unigene4019_All
																									771	CL5881.Contig1_All		771	Unigene7424_All
																									772	CL2523.Contig4_All		772	Unigene20799_All
																									773	CL9658.Contig1_All		773	CL6398.Contig2_All
																									774	Unigene11525_All		774	CL13597.Contig2_All
																									775	Unigene13063_All		775	Unigene30232_All
																									776	Unigene5020_All		776	CL4634.Contig1_All
																									777	CL9537.Contig3_All		777	CL2816.Contig2_All
																									778	CL5832.Contig2_All		778	CL3602.Contig2_All
																									779	Unigene8271_All		779	CL4730.Contig1_All
																									780	Unigene31150_All		780	Unigene8677_All
																									781	CL744.Contig2_All		781	Unigene30870_All
																									782	CL37.Contig1_All		782	CL3901.Contig2_All
																									783	CL1807.Contig1_All		783	CL5653.Contig5_All
																									784	CL9864.Contig2_All		784	CL10456.Contig2_All
																									785	Unigene15998_All		785	CL4397.Contig1_All
																									786	CL4450.Contig1_All		786	CL94.Contig1_All
																									787	Unigene9786_All		787	Unigene27551_All
																									788	CL8295.Contig2_All		788	CL1745.Contig4_All
																									789	CL11163.Contig1_All		789	CL3924.Contig1_All
																									790	CL10595.Contig3_All		790	CL3901.Contig1_All
																									791	CL8894.Contig1_All		791	Unigene30369_All
																									792	CL5576.Contig1_All		792	CL12364.Contig1_All
																									793	CL4781.Contig2_All		793	CL4009.Contig1_All
																									794	Unigene34876_All		794	CL10836.Contig2_All
																									795	Unigene34697_All		795	Unigene12552_All
																									796	CL6944.Contig2_All		796	CL2134.Contig3_All
																									797	Unigene13036_All		797	Unigene33475_All
																									798	CL9954.Contig1_All		798	CL1481.Contig71_All
																									799	CL8118.Contig2_All		799	Unigene4518_All
																									800	CL3761.Contig2_All		800	CL12261.Contig1_All
																									801	CL8884.Contig1_All		801	Unigene25591_All
																									802	CL7075.Contig1_All		802	CL3158.Contig2_All
																									803	CL2613.Contig2_All		803	CL8104.Contig11_All
																									804	CL4264.Contig2_All		804	CL11320.Contig2_All
																									805	CL3265.Contig2_All		805	Unigene20148_All
																									806	Unigene9388_All		806	Unigene18637_All
																									807	CL6495.Contig1_All		807	CL14098.Contig2_All
																									808	CL1452.Contig1_All		808	CL5112.Contig5_All
																									809	CL8699.Contig1_All		809	CL11926.Contig2_All
																									810	CL6378.Contig1_All		810	CL7249.Contig2_All
																									811	CL6256.Contig2_All		811	CL2359.Contig1_All
																									812	Unigene5849_All		812	Unigene19443_All
																									813	CL4538.Contig1_All		813	CL8988.Contig1_All
																									814	CL3840.Contig1_All		814	CL944.Contig10_All
																									815	CL4671.Contig1_All		815	CL4285.Contig2_All
																									816	CL7712.Contig6_All		816	CL490.Contig5_All
																									817	CL77.Contig8_All		817	Unigene4912_All
																									818	CL11184.Contig2_All		818	Unigene33737_All
																									819	Unigene19670_All		819	CL7201.Contig1_All
																									820	CL5641.Contig1_All		820	CL4026.Contig3_All
																									821	CL2898.Contig2_All		821	CL354.Contig16_All
																									822	CL13735.Contig1_All		822	CL1114.Contig11_All
																									823	Unigene5829_All		823	CL11565.Contig1_All
																									824	CL5263.Contig4_All		824	CL11193.Contig4_All
																									825	CL11002.Contig1_All		825	CL2385.Contig1_All
																									826	CL7871.Contig1_All		826	Unigene34750_All
																									827	CL6353.Contig5_All		827	Unigene22330_All
																									828	CL13461.Contig1_All		828	CL168.Contig2_All
																									829	CL5938.Contig1_All		829	CL623.Contig3_All
																									830	CL2495.Contig1_All		830	CL7920.Contig5_All
																									831	Unigene12744_All		831	CL10352.Contig1_All
																									832	CL13188.Contig1_All		832	CL11470.Contig1_All
																									833	CL4105.Contig10_All		833	CL7362.Contig4_All
																									834	CL1066.Contig1_All		834	CL7815.Contig2_All
																									835	CL5721.Contig1_All		835	CL4002.Contig11_All
																									836	CL3902.Contig1_All		836	Unigene31043_All
																									837	Unigene1304_All		837	CL2644.Contig1_All
																									838	Unigene9441_All		838	Unigene5312_All
																									839	Unigene30568_All		839	CL10828.Contig1_All
																									840	Unigene46390_All		840	CL12071.Contig2_All
																									841	CL6741.Contig1_All		841	CL7248.Contig3_All
																									842	Unigene30019_All		842	CL9238.Contig2_All
																									843	CL1959.Contig21_All		843	CL6793.Contig4_All
																									844	CL4210.Contig6_All		844	CL2733.Contig1_All
																									845	CL8101.Contig4_All		845	Unigene23658_All
																									846	CL8944.Contig3_All		846	Unigene315_All
																									847	Unigene8899_All		847	Unigene5152_All
																									848	CL8491.Contig1_All		848	Unigene23884_All
																									849	CL14287.Contig11_All		849	CL10535.Contig1_All
																									850	CL8239.Contig1_All		850	CL2610.Contig6_All
																									851	Unigene19447_All		851	CL5568.Contig1_All
																									852	Unigene20949_All		852	CL1015.Contig1_All
																									853	CL2128.Contig1_All		853	CL8925.Contig1_All
																									854	CL7141.Contig1_All		854	CL4731.Contig2_All
																									855	CL39.Contig1_All		855	CL7770.Contig3_All
																									856	CL1077.Contig4_All		856	CL12437.Contig3_All
																									857	Unigene27522_All		857	CL4302.Contig5_All
																									858	Unigene23834_All		858	CL3397.Contig1_All
																									859	CL7441.Contig1_All		859	CL9377.Contig2_All
																									860	CL5657.Contig1_All		860	CL3927.Contig1_All
																									861	CL9951.Contig1_All		861	CL3793.Contig2_All
																									862	CL11483.Contig1_All		862	CL3120.Contig1_All
																									863	CL7011.Contig2_All		863	CL10115.Contig1_All
																									864	CL12404.Contig3_All		864	CL12104.Contig1_All
																									865	CL2923.Contig1_All		865	CL267.Contig4_All
																									866	CL10902.Contig2_All		866	Unigene27568_All
																									867	CL8098.Contig1_All		867	Unigene25785_All
																									868	CL11221.Contig1_All		868	CL3810.Contig2_All
																									869	CL9917.Contig1_All		869	CL3120.Contig8_All
																									870	Unigene20241_All		870	CL1067.Contig1_All
																									871	CL4046.Contig1_All		871	CL10231.Contig2_All
																									872	CL2419.Contig7_All		872	CL12796.Contig3_All
																									873	Unigene26740_All		873	CL7119.Contig2_All
																									874	CL8467.Contig1_All		874	CL3405.Contig10_All
																									875	Unigene1991_All		875	CL1435.Contig1_All
																									876	CL12662.Contig1_All		876	Unigene5691_All
																									877	CL10082.Contig2_All		877	CL7804.Contig1_All
																									878	CL6606.Contig1_All		878	CL6389.Contig1_All
																									879	CL6678.Contig2_All		879	CL6052.Contig3_All
																									880	CL4727.Contig1_All		880	CL243.Contig10_All
																									881	CL11465.Contig1_All		881	Unigene16494_All
																									882	CL13483.Contig1_All		882	Unigene34723_All
																									883	CL7954.Contig1_All		883	CL4425.Contig2_All
																									884	CL880.Contig2_All		884	Unigene31163_All
																									885	CL2796.Contig1_All		885	CL12594.Contig3_All
																									886	CL6699.Contig1_All		886	Unigene978_All
																									887	CL9513.Contig1_All		887	Unigene13015_All
																									888	CL12249.Contig1_All		888	CL4364.Contig1_All
																									889	Unigene5757_All		889	CL7508.Contig9_All
																									890	CL1384.Contig11_All		890	CL12377.Contig1_All
																									891	CL7158.Contig1_All		891	CL5671.Contig1_All
																									892	Unigene23927_All		892	CL3306.Contig4_All
																									893	CL10509.Contig2_All		893	CL2033.Contig1_All
																									894	CL4240.Contig2_All		894	CL13722.Contig1_All
																									895	CL8683.Contig1_All		895	Unigene34184_All
																									896	CL11670.Contig2_All		896	Unigene13151_All
																									897	CL4321.Contig1_All		897	Unigene5667_All
																									898	CL6206.Contig1_All		898	CL6429.Contig1_All
																									899	CL1989.Contig10_All		899	CL3530.Contig2_All
																									900	CL2054.Contig2_All		900	CL10380.Contig2_All
																									901	Unigene26208_All		901	CL3793.Contig3_All
																									902	Unigene20203_All		902	CL7589.Contig1_All
																									903	CL6269.Contig1_All		903	Unigene11553_All
																									904	CL2938.Contig1_All		904	CL2546.Contig1_All
																									905	CL2514.Contig1_All		905	CL5881.Contig1_All
																									906	CL8843.Contig2_All		906	CL2523.Contig4_All
																									907	CL1966.Contig1_All		907	CL9658.Contig1_All
																									908	CL12036.Contig1_All		908	Unigene11525_All
																									909	Unigene31130_All		909	Unigene13063_All
																									910	Unigene32388_All		910	Unigene5020_All
																									911	Unigene20252_All		911	CL9537.Contig3_All
																									912	CL5869.Contig1_All		912	CL5832.Contig2_All
																									913	CL5099.Contig1_All		913	Unigene8271_All
																									914	CL12187.Contig1_All		914	Unigene31150_All
																									915	CL7610.Contig1_All		915	CL744.Contig2_All
																									916	CL7718.Contig1_All		916	CL37.Contig1_All
																									917	CL13238.Contig1_All		917	CL1807.Contig1_All
																									918	CL4211.Contig2_All		918	CL9864.Contig2_All
																									919	Unigene20250_All		919	Unigene15998_All
																									920	CL6819.Contig6_All		920	CL4450.Contig1_All
																									921	CL12551.Contig1_All		921	Unigene9786_All
																									922	Unigene30254_All		922	CL8295.Contig2_All
																									923	Unigene30684_All		923	CL11163.Contig1_All
																												924	CL10595.Contig3_All
																												925	CL8894.Contig1_All
																												926	CL5576.Contig1_All
																												927	CL4781.Contig2_All
																												928	Unigene34876_All
																												929	Unigene34697_All
																												930	CL6944.Contig2_All
																												931	Unigene13036_All
																												932	CL9954.Contig1_All
																												933	CL8118.Contig2_All
																												934	CL3761.Contig2_All
																												935	CL8884.Contig1_All
																												936	CL7075.Contig1_All
																												937	CL2613.Contig2_All
																												938	CL4264.Contig2_All
																												939	CL3265.Contig2_All
																												940	Unigene9388_All
																												941	CL6495.Contig1_All
																												942	CL1452.Contig1_All
																												943	CL8699.Contig1_All
																												944	CL6378.Contig1_All
																												945	CL6256.Contig2_All
																												946	Unigene5849_All
																												947	CL4538.Contig1_All
																												948	CL3840.Contig1_All
																												949	CL4671.Contig1_All
																												950	CL7712.Contig6_All
																												951	CL77.Contig8_All
																												952	CL11184.Contig2_All
																												953	Unigene19670_All
																												954	CL5641.Contig1_All
																												955	CL2898.Contig2_All
																												956	CL13735.Contig1_All
																												957	Unigene5829_All
																												958	CL5263.Contig4_All
																												959	CL11002.Contig1_All
																												960	CL7871.Contig1_All
																												961	CL6353.Contig5_All
																												962	CL13461.Contig1_All
																												963	CL5938.Contig1_All
																												964	CL2495.Contig1_All
																												965	Unigene12744_All
																												966	CL13188.Contig1_All
																												967	CL4105.Contig10_All
																												968	CL1066.Contig1_All
																												969	CL5721.Contig1_All
																												970	CL3902.Contig1_All
																												971	Unigene1304_All
																												972	Unigene9441_All
																												973	Unigene30568_All
																												974	Unigene46390_All
																												975	CL6741.Contig1_All
																												976	Unigene30019_All
																												977	CL1959.Contig21_All
																												978	CL4210.Contig6_All
																												979	CL8101.Contig4_All
																												980	CL8944.Contig3_All
																												981	Unigene8899_All
																												982	CL8491.Contig1_All
																												983	CL14287.Contig11_All
																												984	CL8239.Contig1_All
																												985	Unigene19447_All
																												986	Unigene20949_All
																												987	CL2128.Contig1_All
																												988	CL7141.Contig1_All
																												989	CL39.Contig1_All
																												990	CL1077.Contig4_All
																												991	Unigene27522_All
																												992	Unigene23834_All
																												993	CL7441.Contig1_All
																												994	CL5657.Contig1_All
																												995	CL9951.Contig1_All
																												996	CL11483.Contig1_All
																												997	CL7011.Contig2_All
																												998	CL12404.Contig3_All
																												999	CL2923.Contig1_All
																												1000	CL10902.Contig2_All
																												1001	CL8098.Contig1_All
																												1002	CL11221.Contig1_All
																												1003	CL9917.Contig1_All
																												1004	Unigene20241_All
																												1005	CL4046.Contig1_All
																												1006	CL2419.Contig7_All
																												1007	Unigene26740_All
																												1008	CL8467.Contig1_All
																												1009	Unigene1991_All
																												1010	CL12662.Contig1_All
																												1011	CL10082.Contig2_All
																												1012	CL6606.Contig1_All
																												1013	CL6678.Contig2_All
																												1014	CL4727.Contig1_All
																												1015	CL11465.Contig1_All
																												1016	CL13483.Contig1_All
																												1017	CL7954.Contig1_All
																												1018	CL880.Contig2_All
																												1019	CL2796.Contig1_All
																												1020	CL6699.Contig1_All
																												1021	CL9513.Contig1_All
																												1022	CL12249.Contig1_All
																												1023	Unigene5757_All
																												1024	CL1384.Contig11_All
																												1025	CL7158.Contig1_All
																												1026	Unigene23927_All
																												1027	CL10509.Contig2_All
																												1028	CL4240.Contig2_All
																												1029	CL8683.Contig1_All
																												1030	CL11670.Contig2_All
																												1031	CL4321.Contig1_All
																												1032	CL6206.Contig1_All
																												1033	CL1989.Contig10_All
																												1034	CL2054.Contig2_All
																												1035	Unigene26208_All
																												1036	Unigene20203_All
																												1037	CL6269.Contig1_All
																												1038	CL2938.Contig1_All
																												1039	CL2514.Contig1_All
																												1040	CL8843.Contig2_All
																												1041	CL1966.Contig1_All
																												1042	CL12036.Contig1_All
																												1043	Unigene31130_All
																												1044	Unigene32388_All
																												1045	Unigene20252_All
																												1046	CL5869.Contig1_All
																												1047	CL5099.Contig1_All
																												1048	CL12187.Contig1_All
																												1049	CL7610.Contig1_All
																												1050	CL7718.Contig1_All
																												1051	CL13238.Contig1_All
																												1052	CL4211.Contig2_All
																												1053	Unigene20250_All
																												1054	CL6819.Contig6_All
																												1055	CL12551.Contig1_All
																												1056	Unigene30254_All
																												1057	Unigene30684_All
