# Supplementary material for: Quantitative proteome-level analysis of paulownia witches’ broom disease with methyl methane sulfonate assistance reveals diverse metabolic changes during the infection and recovery processes
Source: PeerJ. 2017 Jul 3;5:e3495. doi: 10.7717/peerj.3495 (PMC5497676; doi:10.7717/peerj.3495)
Supplement: Table S6 [file peerj-05-3495-s011.xlsx]

## Sheet: Sheet1
Table S6 KEGG pathway analysis for the DAPs in PF vs. PFI
	Pathway	Diff Proteins with pathway annotation (182)	All Proteins with pathway annotation (1727)	Pvalue	Pathway ID
1	Ribosome	29 (15.93%)	126 (7.3%)	1.82155e-05	ko03010
2	Photosynthesis	15 (8.24%)	51 (2.95%)	0.000129542	ko00195
3	Carbon fixation in photosynthetic organisms	15 (8.24%)	65 (3.76%)	0.00219719	ko00710
4	Glyoxylate and dicarboxylate metabolism	8 (4.4%)	37 (2.14%)	0.0344551	ko00630
5	Glycolysis / Gluconeogenesis	13 (7.14%)	73 (4.23%)	0.0372436	ko00010
6	Citrate cycle (TCA cycle)	8 (4.4%)	40 (2.32%)	0.052235	ko00020
7	Pyruvate metabolism	10 (5.49%)	56 (3.24%)	0.0628944	ko00620
8	Lipoic acid metabolism	1 (0.55%)	1 (0.06%)	0.105385	ko00785
9	Fructose and mannose metabolism	5 (2.75%)	27 (1.56%)	0.147253	ko00051
10	One carbon pool by folate	2 (1.1%)	7 (0.41%)	0.162933	ko00670
11	Plant hormone signal transduction	5 (2.75%)	29 (1.68%)	0.183275	ko04075
12	Linoleic acid metabolism	1 (0.55%)	2 (0.12%)	0.199719	ko00591
13	RNA degradation	5 (2.75%)	30 (1.74%)	0.202403	ko03018
14	Tryptophan metabolism	2 (1.1%)	8 (0.46%)	0.202827	ko00380
15	Valine, leucine and isoleucine degradation	3 (1.65%)	16 (0.93%)	0.233532	ko00280
16	Pentose phosphate pathway	5 (2.75%)	33 (1.91%)	0.263305	ko00030
17	Plant-pathogen interaction	7 (3.85%)	50 (2.9%)	0.269597	ko04626
18	Glycosphingolipid biosynthesis - globo series	1 (0.55%)	3 (0.17%)	0.284154	ko00603
19	Protein export	2 (1.1%)	10 (0.58%)	0.284757	ko03060
20	Phagosome	4 (2.2%)	26 (1.51%)	0.29055	ko04145
21	Nitrogen metabolism	3 (1.65%)	20 (1.16%)	0.353849	ko00910
22	Zeatin biosynthesis	1 (0.55%)	4 (0.23%)	0.359725	ko00908
23	Metabolic pathways	71 (39.01%)	650 (37.64%)	0.371424	ko01100
24	Amino sugar and nucleotide sugar metabolism	5 (2.75%)	38 (2.2%)	0.371679	ko00520
25	Protein processing in endoplasmic reticulum	8 (4.4%)	65 (3.76%)	0.376725	ko04141
26	Porphyrin and chlorophyll metabolism	4 (2.2%)	30 (1.74%)	0.390868	ko00860
27	Phosphatidylinositol signaling system	2 (1.1%)	13 (0.75%)	0.405217	ko04070
28	Butanoate metabolism	2 (1.1%)	13 (0.75%)	0.405217	ko00650
29	Glycosphingolipid biosynthesis - ganglio series	1 (0.55%)	5 (0.29%)	0.427357	ko00604
30	Glycosaminoglycan degradation	1 (0.55%)	5 (0.29%)	0.427357	ko00531
31	Photosynthesis - antenna proteins	2 (1.1%)	14 (0.81%)	0.443331	ko00196
32	Terpenoid backbone biosynthesis	2 (1.1%)	15 (0.87%)	0.480064	ko00900
33	Lysine degradation	1 (0.55%)	6 (0.35%)	0.48788	ko00310
34	Galactose metabolism	3 (1.65%)	26 (1.51%)	0.52737	ko00052
35	Glutathione metabolism	4 (2.2%)	36 (2.08%)	0.535918	ko00480
36	Oxidative phosphorylation	7 (3.85%)	66 (3.82%)	0.554287	ko00190
37	Biosynthesis of secondary metabolites	39 (21.43%)	379 (21.95%)	0.60245	ko01110
38	Ascorbate and aldarate metabolism	3 (1.65%)	30 (1.74%)	0.627805	ko00053
39	Spliceosome	5 (2.75%)	52 (3.01%)	0.655796	ko03040
40	Tyrosine metabolism	2 (1.1%)	21 (1.22%)	0.666631	ko00350
41	Peroxisome	3 (1.65%)	32 (1.85%)	0.672226	ko04146
42	Isoquinoline alkaloid biosynthesis	1 (0.55%)	10 (0.58%)	0.672642	ko00950
43	Starch and sucrose metabolism	5 (2.75%)	53 (3.07%)	0.672802	ko00500
44	Glycine, serine and threonine metabolism	3 (1.65%)	33 (1.91%)	0.69294	ko00260
45	Endocytosis	2 (1.1%)	23 (1.33%)	0.715602	ko04144
46	Cyanoamino acid metabolism	2 (1.1%)	23 (1.33%)	0.715602	ko00460
47	Arginine and proline metabolism	2 (1.1%)	24 (1.39%)	0.737752	ko00330
48	Vitamin B6 metabolism	1 (0.55%)	12 (0.69%)	0.738381	ko00750
49	Proteasome	3 (1.65%)	37 (2.14%)	0.765993	ko03050
50	Ubiquitin mediated proteolysis	1 (0.55%)	13 (0.75%)	0.766145	ko04120
51	Valine, leucine and isoleucine biosynthesis	1 (0.55%)	14 (0.81%)	0.790976	ko00290
52	Other glycan degradation	2 (1.1%)	27 (1.56%)	0.795582	ko00511
53	Inositol phosphate metabolism	1 (0.55%)	15 (0.87%)	0.813184	ko00562
54	Pentose and glucuronate interconversions	1 (0.55%)	16 (0.93%)	0.833044	ko00040
55	Phenylpropanoid biosynthesis	3 (1.65%)	42 (2.43%)	0.83685	ko00940
56	Carotenoid biosynthesis	1 (0.55%)	18 (1.04%)	0.866683	ko00906
57	Pyrimidine metabolism	1 (0.55%)	19 (1.1%)	0.880881	ko00240
58	Fatty acid metabolism	1 (0.55%)	19 (1.1%)	0.880881	ko00071
59	mRNA surveillance pathway	2 (1.1%)	37 (2.14%)	0.915296	ko03015
60	Ribosome biogenesis in eukaryotes	1 (0.55%)	23 (1.33%)	0.92413	ko03008
61	Alanine, aspartate and glutamate metabolism	1 (0.55%)	25 (1.45%)	0.939476	ko00250
62	Purine metabolism	1 (0.55%)	39 (2.26%)	0.987654	ko00230
63	RNA transport	2 (1.1%)	58 (3.36%)	0.988704	ko03013
