# Supplementary material for: Quantitative proteome-level analysis of paulownia witches’ broom disease with methyl methane sulfonate assistance reveals diverse metabolic changes during the infection and recovery processes
Source: PeerJ. 2017 Jul 3;5:e3495. doi: 10.7717/peerj.3495 (PMC5497676; doi:10.7717/peerj.3495)
Supplement: Table S7 [file peerj-05-3495-s012.xlsx]

## Sheet:  biological process
Table S7 GO analysis for the DAPs in PF vs. PFI
Gene Ontology term	Cluster frequency	Protein frequency of use	P-value
gene expression	52 out of 189 genes, 27.5%	330 out of 1874 genes, 17.6%	0.000234491
regulation of cell death	10 out of 189 genes, 5.3%	29 out of 1874 genes, 1.5%	0.000311052
regulation of programmed cell death	10 out of 189 genes, 5.3%	29 out of 1874 genes, 1.5%	0.000311052
photosynthesis	33 out of 189 genes, 17.5%	183 out of 1874 genes, 9.8%	0.000366371
translational elongation	8 out of 189 genes, 4.2%	20 out of 1874 genes, 1.1%	0.000401122
chlorophyll biosynthetic process	15 out of 189 genes, 7.9%	63 out of 1874 genes, 3.4%	0.00100534
translation	32 out of 189 genes, 16.9%	188 out of 1874 genes, 10.0%	0.00131409
serine family amino acid metabolic process	18 out of 189 genes, 9.5%	87 out of 1874 genes, 4.6%	0.00186246
cellular protein metabolic process	67 out of 189 genes, 35.4%	495 out of 1874 genes, 26.4%	0.00241871
cysteine metabolic process	14 out of 189 genes, 7.4%	63 out of 1874 genes, 3.4%	0.00299829
cysteine biosynthetic process	14 out of 189 genes, 7.4%	63 out of 1874 genes, 3.4%	0.00299829
generation of precursor metabolites and energy	41 out of 189 genes, 21.7%	272 out of 1874 genes, 14.5%	0.00319649
cofactor biosynthetic process	20 out of 189 genes, 10.6%	106 out of 1874 genes, 5.7%	0.00338022
porphyrin-containing compound biosynthetic process	15 out of 189 genes, 7.9%	71 out of 1874 genes, 3.8%	0.00361475
serine family amino acid biosynthetic process	15 out of 189 genes, 7.9%	71 out of 1874 genes, 3.8%	0.00361475
sulfur amino acid metabolic process	17 out of 189 genes, 9.0%	86 out of 1874 genes, 4.6%	0.00414402
tetrapyrrole biosynthetic process	15 out of 189 genes, 7.9%	72 out of 1874 genes, 3.8%	0.00416623
rRNA processing	18 out of 189 genes, 9.5%	94 out of 1874 genes, 5.0%	0.00457769
rRNA metabolic process	18 out of 189 genes, 9.5%	94 out of 1874 genes, 5.0%	0.00457769
ncRNA processing	18 out of 189 genes, 9.5%	94 out of 1874 genes, 5.0%	0.00457769
chlorophyll metabolic process	15 out of 189 genes, 7.9%	73 out of 1874 genes, 3.9%	0.00478471
protein metabolic process	73 out of 189 genes, 38.6%	568 out of 1874 genes, 30.3%	0.00622275
sulfur amino acid biosynthetic process	15 out of 189 genes, 7.9%	75 out of 1874 genes, 4.0%	0.00624622
regulation of hydrogen peroxide metabolic process	6 out of 189 genes, 3.2%	18 out of 1874 genes, 1.0%	0.00640537
regulation of reactive oxygen species metabolic process	6 out of 189 genes, 3.2%	18 out of 1874 genes, 1.0%	0.00640537
intracellular signal transduction	11 out of 189 genes, 5.8%	48 out of 1874 genes, 2.6%	0.00652317
systemic acquired resistance	10 out of 189 genes, 5.3%	42 out of 1874 genes, 2.2%	0.00707452
photosystem II assembly	13 out of 189 genes, 6.9%	62 out of 1874 genes, 3.3%	0.00711504
systemic acquired resistance, salicylic acid mediated signaling pathway	7 out of 189 genes, 3.7%	24 out of 1874 genes, 1.3%	0.0073997
salicylic acid mediated signaling pathway	7 out of 189 genes, 3.7%	24 out of 1874 genes, 1.3%	0.0073997
cellular response to salicylic acid stimulus	7 out of 189 genes, 3.7%	24 out of 1874 genes, 1.3%	0.0073997
protein folding	17 out of 189 genes, 9.0%	92 out of 1874 genes, 4.9%	0.00845626
response to metal ion	40 out of 189 genes, 21.2%	278 out of 1874 genes, 14.8%	0.00847592
jasmonic acid mediated signaling pathway	6 out of 189 genes, 3.2%	19 out of 1874 genes, 1.0%	0.00859125
negative regulation of defense response	6 out of 189 genes, 3.2%	19 out of 1874 genes, 1.0%	0.00859125
cellular response to jasmonic acid stimulus	6 out of 189 genes, 3.2%	19 out of 1874 genes, 1.0%	0.00859125
response to cadmium ion	38 out of 189 genes, 20.1%	262 out of 1874 genes, 14.0%	0.00908615
photosynthesis, light reaction	22 out of 189 genes, 11.6%	131 out of 1874 genes, 7.0%	0.00927812
cellular macromolecule metabolic process	90 out of 189 genes, 47.6%	738 out of 1874 genes, 39.4%	0.00938902
cellular response to stimulus	36 out of 189 genes, 19.0%	246 out of 1874 genes, 13.1%	0.0096911
pigment biosynthetic process	18 out of 189 genes, 9.5%	101 out of 1874 genes, 5.4%	0.00996075
response to mechanical stimulus	2 out of 189 genes, 1.1%	2 out of 1874 genes, 0.1%	0.0101231
protein sumoylation	2 out of 189 genes, 1.1%	2 out of 1874 genes, 0.1%	0.0101231
calcium-mediated signaling	2 out of 189 genes, 1.1%	2 out of 1874 genes, 0.1%	0.0101231
isoprenoid metabolic process	23 out of 189 genes, 12.2%	141 out of 1874 genes, 7.5%	0.0111846
isoprenoid biosynthetic process	23 out of 189 genes, 12.2%	141 out of 1874 genes, 7.5%	0.0111846
regulation of plant-type hypersensitive response	7 out of 189 genes, 3.7%	26 out of 1874 genes, 1.4%	0.0118151
cellular homeostasis	13 out of 189 genes, 6.9%	66 out of 1874 genes, 3.5%	0.0121738
pentose-phosphate shunt	18 out of 189 genes, 9.5%	103 out of 1874 genes, 5.5%	0.0121956
NADPH regeneration	18 out of 189 genes, 9.5%	104 out of 1874 genes, 5.5%	0.0134535
ribosome biogenesis	19 out of 189 genes, 10.1%	112 out of 1874 genes, 6.0%	0.013829
protein targeting to membrane	8 out of 189 genes, 4.2%	33 out of 1874 genes, 1.8%	0.0139675
porphyrin-containing compound metabolic process	15 out of 189 genes, 7.9%	82 out of 1874 genes, 4.4%	0.0143991
tetrapyrrole metabolic process	15 out of 189 genes, 7.9%	82 out of 1874 genes, 4.4%	0.0143991
negative regulation of response to stimulus	6 out of 189 genes, 3.2%	21 out of 1874 genes, 1.1%	0.0144784
response to biotic stimulus	28 out of 189 genes, 14.8%	185 out of 1874 genes, 9.9%	0.0145994
RNA methylation	7 out of 189 genes, 3.7%	27 out of 1874 genes, 1.4%	0.0146229
regulation of cellular response to stress	7 out of 189 genes, 3.7%	27 out of 1874 genes, 1.4%	0.0146229
macromolecule metabolic process	97 out of 189 genes, 51.3%	817 out of 1874 genes, 43.6%	0.0148273
ribonucleoprotein complex biogenesis	19 out of 189 genes, 10.1%	113 out of 1874 genes, 6.0%	0.0151633
defense response, incompatible interaction	12 out of 189 genes, 6.3%	61 out of 1874 genes, 3.3%	0.0159518
immune system process	15 out of 189 genes, 7.9%	83 out of 1874 genes, 4.4%	0.0160422
NADP metabolic process	18 out of 189 genes, 9.5%	106 out of 1874 genes, 5.7%	0.0162761
peptidyl-amino acid modification	8 out of 189 genes, 4.2%	34 out of 1874 genes, 1.8%	0.0167291
RNA processing	22 out of 189 genes, 11.6%	138 out of 1874 genes, 7.4%	0.0169006
pyridine nucleotide metabolic process	18 out of 189 genes, 9.5%	107 out of 1874 genes, 5.7%	0.0178513
nicotinamide nucleotide metabolic process	18 out of 189 genes, 9.5%	107 out of 1874 genes, 5.7%	0.0178513
response to salicylic acid stimulus	7 out of 189 genes, 3.7%	28 out of 1874 genes, 1.5%	0.0178772
MAPK cascade	6 out of 189 genes, 3.2%	22 out of 1874 genes, 1.2%	0.0182794
intracellular protein kinase cascade	6 out of 189 genes, 3.2%	22 out of 1874 genes, 1.2%	0.0182794
immune response	14 out of 189 genes, 7.4%	77 out of 1874 genes, 4.1%	0.0187837
isopentenyl diphosphate biosynthetic process	17 out of 189 genes, 9.0%	101 out of 1874 genes, 5.4%	0.0210138
isopentenyl diphosphate biosynthetic process, mevalonate-independent pathway	17 out of 189 genes, 9.0%	101 out of 1874 genes, 5.4%	0.0210138
glyceraldehyde-3-phosphate metabolic process	17 out of 189 genes, 9.0%	101 out of 1874 genes, 5.4%	0.0210138
isopentenyl diphosphate metabolic process	17 out of 189 genes, 9.0%	101 out of 1874 genes, 5.4%	0.0210138
glycerol ether metabolic process	5 out of 189 genes, 2.6%	17 out of 1874 genes, 0.9%	0.0223296
ether metabolic process	5 out of 189 genes, 2.6%	17 out of 1874 genes, 0.9%	0.0223296
alpha-amino acid metabolic process	24 out of 189 genes, 12.7%	158 out of 1874 genes, 8.4%	0.0224554
response to other organism	27 out of 189 genes, 14.3%	183 out of 1874 genes, 9.8%	0.022576
response to hydrogen peroxide	11 out of 189 genes, 5.8%	57 out of 1874 genes, 3.0%	0.0237033
defense response	24 out of 189 genes, 12.7%	159 out of 1874 genes, 8.5%	0.0241145
tetraterpenoid metabolic process	10 out of 189 genes, 5.3%	50 out of 1874 genes, 2.7%	0.0241538
tetraterpenoid biosynthetic process	10 out of 189 genes, 5.3%	50 out of 1874 genes, 2.7%	0.0241538
carotenoid metabolic process	10 out of 189 genes, 5.3%	50 out of 1874 genes, 2.7%	0.0241538
carotenoid biosynthetic process	10 out of 189 genes, 5.3%	50 out of 1874 genes, 2.7%	0.0241538
pyridine-containing compound metabolic process	18 out of 189 genes, 9.5%	111 out of 1874 genes, 5.9%	0.0253682
response to bacterium	19 out of 189 genes, 10.1%	119 out of 1874 genes, 6.4%	0.0254289
RNA metabolic process	31 out of 189 genes, 16.4%	219 out of 1874 genes, 11.7%	0.0257648
response to jasmonic acid stimulus	7 out of 189 genes, 3.7%	30 out of 1874 genes, 1.6%	0.0258537
cofactor metabolic process	29 out of 189 genes, 15.3%	202 out of 1874 genes, 10.8%	0.0258774
second-messenger-mediated signaling	3 out of 189 genes, 1.6%	7 out of 1874 genes, 0.4%	0.0260235
protein refolding	3 out of 189 genes, 1.6%	7 out of 1874 genes, 0.4%	0.0260235
multi-organism process	29 out of 189 genes, 15.3%	203 out of 1874 genes, 10.8%	0.027522
alpha-amino acid biosynthetic process	19 out of 189 genes, 10.1%	120 out of 1874 genes, 6.4%	0.0275613
pigment metabolic process	18 out of 189 genes, 9.5%	112 out of 1874 genes, 6.0%	0.0275778
coenzyme metabolic process	24 out of 189 genes, 12.7%	161 out of 1874 genes, 8.6%	0.0277178
peptidyl-proline modification	6 out of 189 genes, 3.2%	24 out of 1874 genes, 1.3%	0.0278163
regulation of photomorphogenesis	2 out of 189 genes, 1.1%	3 out of 1874 genes, 0.2%	0.0283468
pyruvate metabolic process	17 out of 189 genes, 9.0%	105 out of 1874 genes, 5.6%	0.0298709
positive regulation of biosynthetic process	11 out of 189 genes, 5.8%	59 out of 1874 genes, 3.1%	0.0300585
positive regulation of cellular biosynthetic process	11 out of 189 genes, 5.8%	59 out of 1874 genes, 3.1%	0.0300585
innate immune response	13 out of 189 genes, 6.9%	74 out of 1874 genes, 3.9%	0.0301852
regulation of immune system process	7 out of 189 genes, 3.7%	31 out of 1874 genes, 1.7%	0.030634
regulation of innate immune response	7 out of 189 genes, 3.7%	31 out of 1874 genes, 1.7%	0.030634
regulation of immune response	7 out of 189 genes, 3.7%	31 out of 1874 genes, 1.7%	0.030634
response to inorganic substance	46 out of 189 genes, 24.3%	355 out of 1874 genes, 18.9%	0.0313244
cellular response to organic cyclic compound	9 out of 189 genes, 4.8%	45 out of 1874 genes, 2.4%	0.0317844
response to temperature stimulus	28 out of 189 genes, 14.8%	197 out of 1874 genes, 10.5%	0.0320934
cellular aldehyde metabolic process	19 out of 189 genes, 10.1%	122 out of 1874 genes, 6.5%	0.0322304
cellular ion homeostasis	6 out of 189 genes, 3.2%	25 out of 1874 genes, 1.3%	0.0336259
cellular cation homeostasis	6 out of 189 genes, 3.2%	25 out of 1874 genes, 1.3%	0.0336259
detection of stimulus	5 out of 189 genes, 2.6%	19 out of 1874 genes, 1.0%	0.0355482
divalent metal ion transport	7 out of 189 genes, 3.7%	32 out of 1874 genes, 1.7%	0.0359763
divalent inorganic cation transport	7 out of 189 genes, 3.7%	32 out of 1874 genes, 1.7%	0.0359763
macromolecule methylation	9 out of 189 genes, 4.8%	46 out of 1874 genes, 2.5%	0.0361842
sulfur compound metabolic process	21 out of 189 genes, 11.1%	140 out of 1874 genes, 7.5%	0.0362656
phospholipid biosynthetic process	18 out of 189 genes, 9.5%	116 out of 1874 genes, 6.2%	0.0378926
lipid biosynthetic process	28 out of 189 genes, 14.8%	200 out of 1874 genes, 10.7%	0.0383217
positive regulation of translation	3 out of 189 genes, 1.6%	8 out of 1874 genes, 0.4%	0.0385965
glycine metabolic process	6 out of 189 genes, 3.2%	26 out of 1874 genes, 1.4%	0.0401692
unsaturated fatty acid biosynthetic process	6 out of 189 genes, 3.2%	26 out of 1874 genes, 1.4%	0.0401692
unsaturated fatty acid metabolic process	6 out of 189 genes, 3.2%	26 out of 1874 genes, 1.4%	0.0401692
cellular chemical homeostasis	6 out of 189 genes, 3.2%	26 out of 1874 genes, 1.4%	0.0401692
oxidoreduction coenzyme metabolic process	19 out of 189 genes, 10.1%	125 out of 1874 genes, 6.7%	0.0403131
macromolecule modification	28 out of 189 genes, 14.8%	201 out of 1874 genes, 10.7%	0.0405893
positive regulation of metabolic process	11 out of 189 genes, 5.8%	62 out of 1874 genes, 3.3%	0.0417548
terpenoid biosynthetic process	11 out of 189 genes, 5.8%	62 out of 1874 genes, 3.3%	0.0417548
positive regulation of cellular metabolic process	11 out of 189 genes, 5.8%	62 out of 1874 genes, 3.3%	0.0417548
cellular response to chemical stimulus	18 out of 189 genes, 9.5%	118 out of 1874 genes, 6.3%	0.0440043
positive regulation of macromolecule biosynthetic process	10 out of 189 genes, 5.3%	55 out of 1874 genes, 2.9%	0.0441142
homeostatic process	14 out of 189 genes, 7.4%	86 out of 1874 genes, 4.6%	0.0448641
terpenoid metabolic process	11 out of 189 genes, 5.8%	63 out of 1874 genes, 3.4%	0.0462723
nucleic acid metabolic process	35 out of 189 genes, 18.5%	265 out of 1874 genes, 14.1%	0.0468117
response to heat	12 out of 189 genes, 6.3%	71 out of 1874 genes, 3.8%	0.0476764
cellular macromolecular complex assembly	23 out of 189 genes, 12.2%	161 out of 1874 genes, 8.6%	0.0478476
regulation of defense response	7 out of 189 genes, 3.7%	34 out of 1874 genes, 1.8%	0.048428
response to endoplasmic reticulum stress	7 out of 189 genes, 3.7%	34 out of 1874 genes, 1.8%	0.048428
regulation of response to stress	7 out of 189 genes, 3.7%	34 out of 1874 genes, 1.8%	0.048428
cellular response to oxygen-containing compound	14 out of 189 genes, 7.4%	87 out of 1874 genes, 4.6%	0.0488459
response to light stimulus	25 out of 189 genes, 13.2%	179 out of 1874 genes, 9.6%	0.0505274
regulation of response to stimulus	9 out of 189 genes, 4.8%	49 out of 1874 genes, 2.6%	0.0518449
regulation of translational termination	2 out of 189 genes, 1.1%	4 out of 1874 genes, 0.2%	0.0529502
translational frameshifting	2 out of 189 genes, 1.1%	4 out of 1874 genes, 0.2%	0.0529502
peptidyl-lysine modification to hypusine	2 out of 189 genes, 1.1%	4 out of 1874 genes, 0.2%	0.0529502
nonphotochemical quenching	2 out of 189 genes, 1.1%	4 out of 1874 genes, 0.2%	0.0529502
regulation of fatty acid metabolic process	2 out of 189 genes, 1.1%	4 out of 1874 genes, 0.2%	0.0529502
positive regulation of protein complex disassembly	2 out of 189 genes, 1.1%	4 out of 1874 genes, 0.2%	0.0529502
positive regulation of translational elongation	2 out of 189 genes, 1.1%	4 out of 1874 genes, 0.2%	0.0529502
positive regulation of translational termination	2 out of 189 genes, 1.1%	4 out of 1874 genes, 0.2%	0.0529502
hypusine metabolic process	2 out of 189 genes, 1.1%	4 out of 1874 genes, 0.2%	0.0529502
energy quenching	2 out of 189 genes, 1.1%	4 out of 1874 genes, 0.2%	0.0529502
regulation of response to red or far red light	2 out of 189 genes, 1.1%	4 out of 1874 genes, 0.2%	0.0529502
positive regulation of macromolecule metabolic process	10 out of 189 genes, 5.3%	57 out of 1874 genes, 3.0%	0.054571
regulation of response to biotic stimulus	4 out of 189 genes, 2.1%	15 out of 1874 genes, 0.8%	0.0562896
lipoate metabolic process	4 out of 189 genes, 2.1%	15 out of 1874 genes, 0.8%	0.0562896
detection of biotic stimulus	4 out of 189 genes, 2.1%	15 out of 1874 genes, 0.8%	0.0562896
cellular component biogenesis	36 out of 189 genes, 19.0%	278 out of 1874 genes, 14.8%	0.0567404
macromolecular complex assembly	23 out of 189 genes, 12.2%	164 out of 1874 genes, 8.8%	0.0572801
positive regulation of cellular process	13 out of 189 genes, 6.9%	81 out of 1874 genes, 4.3%	0.057615
cellular response to stress	18 out of 189 genes, 9.5%	122 out of 1874 genes, 6.5%	0.0583143
response to abiotic stimulus	56 out of 189 genes, 29.6%	462 out of 1874 genes, 24.7%	0.058333
ncRNA metabolic process	19 out of 189 genes, 10.1%	131 out of 1874 genes, 7.0%	0.0607795
sulfur compound biosynthetic process	18 out of 189 genes, 9.5%	123 out of 1874 genes, 6.6%	0.0623494
protein peptidyl-prolyl isomerization	5 out of 189 genes, 2.6%	22 out of 1874 genes, 1.2%	0.0628965
glycine catabolic process	5 out of 189 genes, 2.6%	22 out of 1874 genes, 1.2%	0.0628965
serine family amino acid catabolic process	5 out of 189 genes, 2.6%	22 out of 1874 genes, 1.2%	0.0628965
salicylic acid metabolic process	5 out of 189 genes, 2.6%	22 out of 1874 genes, 1.2%	0.0628965
salicylic acid biosynthetic process	5 out of 189 genes, 2.6%	22 out of 1874 genes, 1.2%	0.0628965
response to radiation	25 out of 189 genes, 13.2%	183 out of 1874 genes, 9.8%	0.0631888
macromolecule biosynthetic process	46 out of 189 genes, 24.3%	372 out of 1874 genes, 19.9%	0.064672
defense response to bacterium	15 out of 189 genes, 7.9%	99 out of 1874 genes, 5.3%	0.0663161
phospholipid metabolic process	18 out of 189 genes, 9.5%	124 out of 1874 genes, 6.6%	0.0665744
glucose catabolic process	26 out of 189 genes, 13.8%	193 out of 1874 genes, 10.3%	0.0676356
hexose catabolic process	26 out of 189 genes, 13.8%	193 out of 1874 genes, 10.3%	0.0676356
monosaccharide catabolic process	26 out of 189 genes, 13.8%	193 out of 1874 genes, 10.3%	0.0676356
response to reactive oxygen species	12 out of 189 genes, 6.3%	75 out of 1874 genes, 4.0%	0.0680271
cellular macromolecule biosynthetic process	44 out of 189 genes, 23.3%	355 out of 1874 genes, 18.9%	0.068284
regulation of translation	4 out of 189 genes, 2.1%	16 out of 1874 genes, 0.9%	0.0693426
response to glucose stimulus	4 out of 189 genes, 2.1%	16 out of 1874 genes, 0.9%	0.0693426
response to chitin	4 out of 189 genes, 2.1%	16 out of 1874 genes, 0.9%	0.0693426
carbon fixation	4 out of 189 genes, 2.1%	16 out of 1874 genes, 0.9%	0.0693426
cellular response to abiotic stimulus	4 out of 189 genes, 2.1%	16 out of 1874 genes, 0.9%	0.0693426
single-organism developmental process	35 out of 189 genes, 18.5%	274 out of 1874 genes, 14.6%	0.0708986
positive regulation of cellular protein metabolic process	3 out of 189 genes, 1.6%	10 out of 1874 genes, 0.5%	0.0711596
positive regulation of protein metabolic process	3 out of 189 genes, 1.6%	10 out of 1874 genes, 0.5%	0.0711596
response to zinc ion	5 out of 189 genes, 2.6%	23 out of 1874 genes, 1.2%	0.0740588
cellular response to hydrogen peroxide	5 out of 189 genes, 2.6%	23 out of 1874 genes, 1.2%	0.0740588
carbohydrate catabolic process	28 out of 189 genes, 14.8%	213 out of 1874 genes, 11.4%	0.0762085
glucose metabolic process	29 out of 189 genes, 15.3%	222 out of 1874 genes, 11.8%	0.0766589
peptidyl-lysine modification	2 out of 189 genes, 1.1%	5 out of 1874 genes, 0.3%	0.0824743
cuticle development	2 out of 189 genes, 1.1%	5 out of 1874 genes, 0.3%	0.0824743
regulation of protein complex disassembly	2 out of 189 genes, 1.1%	5 out of 1874 genes, 0.3%	0.0824743
cellular lipid metabolic process	30 out of 189 genes, 15.9%	233 out of 1874 genes, 12.4%	0.0843422
single-organism carbohydrate catabolic process	26 out of 189 genes, 13.8%	198 out of 1874 genes, 10.6%	0.0868506
response to cold	17 out of 189 genes, 9.0%	120 out of 1874 genes, 6.4%	0.088178
leaf morphogenesis	7 out of 189 genes, 3.7%	39 out of 1874 genes, 2.1%	0.0904158
cell redox homeostasis	7 out of 189 genes, 3.7%	39 out of 1874 genes, 2.1%	0.0904158
response to stress	65 out of 189 genes, 34.4%	560 out of 1874 genes, 29.9%	0.0904718
regulation of cellular ketone metabolic process	3 out of 189 genes, 1.6%	11 out of 1874 genes, 0.6%	0.0908181
hexose metabolic process	30 out of 189 genes, 15.9%	235 out of 1874 genes, 12.5%	0.0921585
cellular metabolic process	141 out of 189 genes, 74.6%	1316 out of 1874 genes, 70.2%	0.0948252
response to organic cyclic compound	9 out of 189 genes, 4.8%	55 out of 1874 genes, 2.9%	0.0950608
response to organic nitrogen	4 out of 189 genes, 2.1%	18 out of 1874 genes, 1.0%	0.0996235
methylation	11 out of 189 genes, 5.8%	72 out of 1874 genes, 3.8%	0.102248
shoot system morphogenesis	10 out of 189 genes, 5.3%	64 out of 1874 genes, 3.4%	0.103437
cellular component assembly	25 out of 189 genes, 13.2%	194 out of 1874 genes, 10.4%	0.10921
response to chemical stimulus	61 out of 189 genes, 32.3%	529 out of 1874 genes, 28.2%	0.112371
malate metabolic process	3 out of 189 genes, 1.6%	12 out of 1874 genes, 0.6%	0.112446
nucleosome assembly	3 out of 189 genes, 1.6%	12 out of 1874 genes, 0.6%	0.112446
chromatin assembly	3 out of 189 genes, 1.6%	12 out of 1874 genes, 0.6%	0.112446
nucleosome organization	3 out of 189 genes, 1.6%	12 out of 1874 genes, 0.6%	0.112446
protein-DNA complex assembly	3 out of 189 genes, 1.6%	12 out of 1874 genes, 0.6%	0.112446
protein-DNA complex subunit organization	3 out of 189 genes, 1.6%	12 out of 1874 genes, 0.6%	0.112446
primary metabolic process	134 out of 189 genes, 70.9%	1250 out of 1874 genes, 66.7%	0.112455
positive regulation of biological process	13 out of 189 genes, 6.9%	90 out of 1874 genes, 4.8%	0.112703
regulation of cellular protein metabolic process	9 out of 189 genes, 4.8%	57 out of 1874 genes, 3.0%	0.113091
leaf development	9 out of 189 genes, 4.8%	57 out of 1874 genes, 3.0%	0.113091
hormone-mediated signaling pathway	8 out of 189 genes, 4.2%	49 out of 1874 genes, 2.6%	0.113134
benzene-containing compound metabolic process	5 out of 189 genes, 2.6%	26 out of 1874 genes, 1.4%	0.113476
very long-chain fatty acid metabolic process	2 out of 189 genes, 1.1%	6 out of 1874 genes, 0.3%	0.115687
valine metabolic process	2 out of 189 genes, 1.1%	6 out of 1874 genes, 0.3%	0.115687
cellular response to water deprivation	2 out of 189 genes, 1.1%	6 out of 1874 genes, 0.3%	0.115687
cellular response to water stimulus	2 out of 189 genes, 1.1%	6 out of 1874 genes, 0.3%	0.115687
regulation of multi-organism process	4 out of 189 genes, 2.1%	19 out of 1874 genes, 1.0%	0.11671
single-organism cellular process	87 out of 189 genes, 46.0%	782 out of 1874 genes, 41.7%	0.117788
shoot system development	13 out of 189 genes, 6.9%	91 out of 1874 genes, 4.9%	0.120281
electron transport chain	10 out of 189 genes, 5.3%	66 out of 1874 genes, 3.5%	0.120975
cell communication	19 out of 189 genes, 10.1%	143 out of 1874 genes, 7.6%	0.12125
plastid organization	19 out of 189 genes, 10.1%	143 out of 1874 genes, 7.6%	0.12125
signal transduction	16 out of 189 genes, 8.5%	117 out of 1874 genes, 6.2%	0.122384
post-embryonic morphogenesis	7 out of 189 genes, 3.7%	42 out of 1874 genes, 2.2%	0.12309
reactive oxygen species metabolic process	7 out of 189 genes, 3.7%	42 out of 1874 genes, 2.2%	0.12309
monosaccharide metabolic process	30 out of 189 genes, 15.9%	242 out of 1874 genes, 12.9%	0.123313
fatty acid biosynthetic process	8 out of 189 genes, 4.2%	50 out of 1874 genes, 2.7%	0.12365
organ morphogenesis	8 out of 189 genes, 4.2%	50 out of 1874 genes, 2.7%	0.12365
positive regulation of gene expression	8 out of 189 genes, 4.2%	50 out of 1874 genes, 2.7%	0.12365
positive regulation of transcription, DNA-dependent	8 out of 189 genes, 4.2%	50 out of 1874 genes, 2.7%	0.12365
positive regulation of nucleobase-containing compound metabolic process	8 out of 189 genes, 4.2%	50 out of 1874 genes, 2.7%	0.12365
positive regulation of nitrogen compound metabolic process	8 out of 189 genes, 4.2%	50 out of 1874 genes, 2.7%	0.12365
positive regulation of RNA metabolic process	8 out of 189 genes, 4.2%	50 out of 1874 genes, 2.7%	0.12365
stomatal complex morphogenesis	5 out of 189 genes, 2.6%	27 out of 1874 genes, 1.4%	0.128478
stomatal complex development	5 out of 189 genes, 2.6%	27 out of 1874 genes, 1.4%	0.128478
cellular response to reactive oxygen species	5 out of 189 genes, 2.6%	27 out of 1874 genes, 1.4%	0.128478
hydrogen peroxide metabolic process	5 out of 189 genes, 2.6%	27 out of 1874 genes, 1.4%	0.128478
cellular amino acid biosynthetic process	21 out of 189 genes, 11.1%	162 out of 1874 genes, 8.6%	0.129316
organic acid biosynthetic process	28 out of 189 genes, 14.8%	225 out of 1874 genes, 12.0%	0.129371
carboxylic acid biosynthetic process	28 out of 189 genes, 14.8%	225 out of 1874 genes, 12.0%	0.129371
cellular response to organic substance	12 out of 189 genes, 6.3%	84 out of 1874 genes, 4.5%	0.132281
phyllome development	9 out of 189 genes, 4.8%	59 out of 1874 genes, 3.1%	0.132895
cellular protein complex assembly	19 out of 189 genes, 10.1%	145 out of 1874 genes, 7.7%	0.134008
metabolic process	166 out of 189 genes, 87.8%	1590 out of 1874 genes, 84.8%	0.134517
transcription, DNA-dependent	7 out of 189 genes, 3.7%	43 out of 1874 genes, 2.3%	0.13517
RNA modification	7 out of 189 genes, 3.7%	43 out of 1874 genes, 2.3%	0.13517
RNA biosynthetic process	7 out of 189 genes, 3.7%	43 out of 1874 genes, 2.3%	0.13517
chemical homeostasis	7 out of 189 genes, 3.7%	43 out of 1874 genes, 2.3%	0.13517
cellular protein modification process	21 out of 189 genes, 11.1%	163 out of 1874 genes, 8.7%	0.135483
protein modification process	21 out of 189 genes, 11.1%	163 out of 1874 genes, 8.7%	0.135483
response to stimulus	96 out of 189 genes, 50.8%	876 out of 1874 genes, 46.7%	0.135794
DNA packaging	3 out of 189 genes, 1.6%	13 out of 1874 genes, 0.7%	0.135808
regulation of cellular metabolic process	22 out of 189 genes, 11.6%	172 out of 1874 genes, 9.2%	0.135859
macromolecular complex subunit organization	23 out of 189 genes, 12.2%	181 out of 1874 genes, 9.7%	0.136036
defense response to fungus	5 out of 189 genes, 2.6%	28 out of 1874 genes, 1.5%	0.144334
response to high light intensity	8 out of 189 genes, 4.2%	52 out of 1874 genes, 2.8%	0.146165
posttranscriptional regulation of gene expression	6 out of 189 genes, 3.2%	36 out of 1874 genes, 1.9%	0.147658
cation homeostasis	6 out of 189 genes, 3.2%	36 out of 1874 genes, 1.9%	0.147658
response to red light	7 out of 189 genes, 3.7%	44 out of 1874 genes, 2.3%	0.147813
response to far red light	7 out of 189 genes, 3.7%	44 out of 1874 genes, 2.3%	0.147813
regulation of translational elongation	2 out of 189 genes, 1.1%	7 out of 1874 genes, 0.4%	0.151552
auxin mediated signaling pathway	2 out of 189 genes, 1.1%	7 out of 1874 genes, 0.4%	0.151552
pollen germination	2 out of 189 genes, 1.1%	7 out of 1874 genes, 0.4%	0.151552
floral organ morphogenesis	2 out of 189 genes, 1.1%	7 out of 1874 genes, 0.4%	0.151552
floral organ formation	2 out of 189 genes, 1.1%	7 out of 1874 genes, 0.4%	0.151552
post-embryonic organ morphogenesis	2 out of 189 genes, 1.1%	7 out of 1874 genes, 0.4%	0.151552
lipid metabolic process	32 out of 189 genes, 16.9%	266 out of 1874 genes, 14.2%	0.15227
regulation of protein metabolic process	9 out of 189 genes, 4.8%	61 out of 1874 genes, 3.3%	0.154402
protein complex assembly	19 out of 189 genes, 10.1%	148 out of 1874 genes, 7.9%	0.154573
protein complex biogenesis	19 out of 189 genes, 10.1%	148 out of 1874 genes, 7.9%	0.154573
nucleobase-containing compound metabolic process	51 out of 189 genes, 27.0%	445 out of 1874 genes, 23.7%	0.155512
regulation of macromolecule biosynthetic process	15 out of 189 genes, 7.9%	113 out of 1874 genes, 6.0%	0.158117
regulation of cellular macromolecule biosynthetic process	15 out of 189 genes, 7.9%	113 out of 1874 genes, 6.0%	0.158117
cellular response to hormone stimulus	8 out of 189 genes, 4.2%	53 out of 1874 genes, 2.8%	0.158133
cellular response to endogenous stimulus	8 out of 189 genes, 4.2%	53 out of 1874 genes, 2.8%	0.158133
chloroplast organization	12 out of 189 genes, 6.3%	87 out of 1874 genes, 4.6%	0.159367
photosynthetic electron transport in photosystem I	5 out of 189 genes, 2.6%	29 out of 1874 genes, 1.5%	0.160989
cellular response to oxidative stress	5 out of 189 genes, 2.6%	29 out of 1874 genes, 1.5%	0.160989
regulation of post-embryonic development	6 out of 189 genes, 3.2%	37 out of 1874 genes, 2.0%	0.162354
protein modification by small protein conjugation or removal	6 out of 189 genes, 3.2%	37 out of 1874 genes, 2.0%	0.162354
regulation of gene expression	16 out of 189 genes, 8.5%	123 out of 1874 genes, 6.6%	0.167732
signaling	16 out of 189 genes, 8.5%	123 out of 1874 genes, 6.6%	0.167732
single organism signaling	16 out of 189 genes, 8.5%	123 out of 1874 genes, 6.6%	0.167732
organic substance metabolic process	140 out of 189 genes, 74.1%	1328 out of 1874 genes, 70.9%	0.173962
tricarboxylic acid cycle	4 out of 189 genes, 2.1%	22 out of 1874 genes, 1.2%	0.17464
hydrogen peroxide catabolic process	4 out of 189 genes, 2.1%	22 out of 1874 genes, 1.2%	0.17464
regulation of biological quality	20 out of 189 genes, 10.6%	160 out of 1874 genes, 8.5%	0.176528
response to sucrose stimulus	6 out of 189 genes, 3.2%	38 out of 1874 genes, 2.0%	0.177654
response to disaccharide stimulus	6 out of 189 genes, 3.2%	38 out of 1874 genes, 2.0%	0.177654
ion homeostasis	6 out of 189 genes, 3.2%	38 out of 1874 genes, 2.0%	0.177654
organonitrogen compound biosynthetic process	36 out of 189 genes, 19.0%	309 out of 1874 genes, 16.5%	0.183989
regulation of cell size	2 out of 189 genes, 1.1%	8 out of 1874 genes, 0.4%	0.189204
cellular response to auxin stimulus	2 out of 189 genes, 1.1%	8 out of 1874 genes, 0.4%	0.189204
response to extracellular stimulus	4 out of 189 genes, 2.1%	23 out of 1874 genes, 1.2%	0.195816
cellular response to extracellular stimulus	4 out of 189 genes, 2.1%	23 out of 1874 genes, 1.2%	0.195816
cellular response to external stimulus	4 out of 189 genes, 2.1%	23 out of 1874 genes, 1.2%	0.195816
heterocycle biosynthetic process	30 out of 189 genes, 15.9%	255 out of 1874 genes, 13.6%	0.196935
cellular process	158 out of 189 genes, 83.6%	1519 out of 1874 genes, 81.1%	0.201106
single-organism process	99 out of 189 genes, 52.4%	924 out of 1874 genes, 49.3%	0.207563
plant-type cell wall organization	6 out of 189 genes, 3.2%	40 out of 1874 genes, 2.1%	0.209895
regulation of protein dephosphorylation	6 out of 189 genes, 3.2%	40 out of 1874 genes, 2.1%	0.209895
response to nitrogen compound	6 out of 189 genes, 3.2%	40 out of 1874 genes, 2.1%	0.209895
response to light intensity	8 out of 189 genes, 4.2%	57 out of 1874 genes, 3.0%	0.210304
regulation of transcription, DNA-dependent	13 out of 189 genes, 6.9%	101 out of 1874 genes, 5.4%	0.211248
regulation of RNA biosynthetic process	13 out of 189 genes, 6.9%	101 out of 1874 genes, 5.4%	0.211248
regulation of cellular biosynthetic process	15 out of 189 genes, 7.9%	119 out of 1874 genes, 6.4%	0.211736
chromatin assembly or disassembly	3 out of 189 genes, 1.6%	16 out of 1874 genes, 0.9%	0.213842
DNA conformation change	3 out of 189 genes, 1.6%	16 out of 1874 genes, 0.9%	0.213842
aerobic respiration	5 out of 189 genes, 2.6%	32 out of 1874 genes, 1.7%	0.215121
metal ion transport	7 out of 189 genes, 3.7%	49 out of 1874 genes, 2.6%	0.218586
regulation of cellular process	38 out of 189 genes, 20.1%	334 out of 1874 genes, 17.8%	0.220119
regulation of macromolecule metabolic process	19 out of 189 genes, 10.1%	157 out of 1874 genes, 8.4%	0.22594
response to fungus	6 out of 189 genes, 3.2%	41 out of 1874 genes, 2.2%	0.226746
superoxide metabolic process	2 out of 189 genes, 1.1%	9 out of 1874 genes, 0.5%	0.227923
organ formation	2 out of 189 genes, 1.1%	9 out of 1874 genes, 0.5%	0.227923
regulation of biosynthetic process	15 out of 189 genes, 7.9%	121 out of 1874 genes, 6.5%	0.231267
fatty acid metabolic process	12 out of 189 genes, 6.3%	94 out of 1874 genes, 5.0%	0.232382
cell wall organization or biogenesis	12 out of 189 genes, 6.3%	94 out of 1874 genes, 5.0%	0.232382
response to hexose stimulus	5 out of 189 genes, 2.6%	33 out of 1874 genes, 1.8%	0.234329
response to monosaccharide stimulus	5 out of 189 genes, 2.6%	33 out of 1874 genes, 1.8%	0.234329
multicellular organismal development	41 out of 189 genes, 21.7%	365 out of 1874 genes, 19.5%	0.235121
post-embryonic development	25 out of 189 genes, 13.2%	214 out of 1874 genes, 11.4%	0.236953
cell wall macromolecule metabolic process	4 out of 189 genes, 2.1%	25 out of 1874 genes, 1.3%	0.240277
system development	33 out of 189 genes, 17.5%	290 out of 1874 genes, 15.5%	0.241963
regulation of dephosphorylation	6 out of 189 genes, 3.2%	42 out of 1874 genes, 2.2%	0.244022
response to blue light	7 out of 189 genes, 3.7%	51 out of 1874 genes, 2.7%	0.24985
energy derivation by oxidation of organic compounds	7 out of 189 genes, 3.7%	51 out of 1874 genes, 2.7%	0.24985
regulation of RNA metabolic process	13 out of 189 genes, 6.9%	105 out of 1874 genes, 5.6%	0.254425
single-multicellular organism process	42 out of 189 genes, 22.2%	378 out of 1874 genes, 20.2%	0.25644
cellular biosynthetic process	83 out of 189 genes, 43.9%	777 out of 1874 genes, 41.5%	0.259126
cellular respiration	6 out of 189 genes, 3.2%	43 out of 1874 genes, 2.3%	0.261674
multicellular organismal process	42 out of 189 genes, 22.2%	379 out of 1874 genes, 20.2%	0.262776
organic cyclic compound biosynthetic process	34 out of 189 genes, 18.0%	303 out of 1874 genes, 16.2%	0.26617
small molecule biosynthetic process	30 out of 189 genes, 15.9%	265 out of 1874 genes, 14.1%	0.266414
DNA-dependent transcription, elongation	2 out of 189 genes, 1.1%	10 out of 1874 genes, 0.5%	0.267114
lipid transport	2 out of 189 genes, 1.1%	10 out of 1874 genes, 0.5%	0.267114
leaf senescence	2 out of 189 genes, 1.1%	10 out of 1874 genes, 0.5%	0.267114
cellular response to phosphate starvation	2 out of 189 genes, 1.1%	10 out of 1874 genes, 0.5%	0.267114
response to freezing	2 out of 189 genes, 1.1%	10 out of 1874 genes, 0.5%	0.267114
regulation of multicellular organismal process	8 out of 189 genes, 4.2%	61 out of 1874 genes, 3.3%	0.268222
regulation of multicellular organismal development	8 out of 189 genes, 4.2%	61 out of 1874 genes, 3.3%	0.268222
response to red or far red light	9 out of 189 genes, 4.8%	70 out of 1874 genes, 3.7%	0.269116
acetyl-CoA metabolic process	3 out of 189 genes, 1.6%	18 out of 1874 genes, 1.0%	0.270124
cell death	3 out of 189 genes, 1.6%	18 out of 1874 genes, 1.0%	0.270124
lipid localization	3 out of 189 genes, 1.6%	18 out of 1874 genes, 1.0%	0.270124
death	3 out of 189 genes, 1.6%	18 out of 1874 genes, 1.0%	0.270124
response to oxygen-containing compound	28 out of 189 genes, 14.8%	247 out of 1874 genes, 13.2%	0.273739
photosynthetic electron transport chain	5 out of 189 genes, 2.6%	35 out of 1874 genes, 1.9%	0.274068
regulation of protein modification process	6 out of 189 genes, 3.2%	44 out of 1874 genes, 2.3%	0.279652
monocarboxylic acid metabolic process	26 out of 189 genes, 13.8%	229 out of 1874 genes, 12.2%	0.281263
plant-type cell wall organization or biogenesis	7 out of 189 genes, 3.7%	53 out of 1874 genes, 2.8%	0.28239
heterocycle metabolic process	56 out of 189 genes, 29.6%	518 out of 1874 genes, 27.6%	0.28581
pattern specification process	4 out of 189 genes, 2.1%	27 out of 1874 genes, 1.4%	0.286784
response to oxidative stress	15 out of 189 genes, 7.9%	127 out of 1874 genes, 6.8%	0.293984
response to salt stress	20 out of 189 genes, 10.6%	174 out of 1874 genes, 9.3%	0.295768
response to virus	3 out of 189 genes, 1.6%	19 out of 1874 genes, 1.0%	0.298889
phenylpropanoid biosynthetic process	3 out of 189 genes, 1.6%	19 out of 1874 genes, 1.0%	0.298889
gene silencing by RNA	3 out of 189 genes, 1.6%	19 out of 1874 genes, 1.0%	0.298889
protein modification by small protein conjugation	3 out of 189 genes, 1.6%	19 out of 1874 genes, 1.0%	0.298889
protein complex subunit organization	19 out of 189 genes, 10.1%	165 out of 1874 genes, 8.8%	0.29971
anatomical structure development	37 out of 189 genes, 19.6%	337 out of 1874 genes, 18.0%	0.303493
developmental process	43 out of 189 genes, 22.8%	395 out of 1874 genes, 21.1%	0.3045
aromatic compound biosynthetic process	30 out of 189 genes, 15.9%	270 out of 1874 genes, 14.4%	0.304613
organ senescence	2 out of 189 genes, 1.1%	11 out of 1874 genes, 0.6%	0.306291
heat acclimation	2 out of 189 genes, 1.1%	11 out of 1874 genes, 0.6%	0.306291
reductive pentose-phosphate cycle	2 out of 189 genes, 1.1%	11 out of 1874 genes, 0.6%	0.306291
photosynthesis, dark reaction	2 out of 189 genes, 1.1%	11 out of 1874 genes, 0.6%	0.306291
biological regulation	54 out of 189 genes, 28.6%	502 out of 1874 genes, 26.8%	0.306677
cell wall modification	4 out of 189 genes, 2.1%	28 out of 1874 genes, 1.5%	0.310526
carboxylic acid metabolic process	46 out of 189 genes, 24.3%	425 out of 1874 genes, 22.7%	0.310953
cell wall biogenesis	5 out of 189 genes, 2.6%	37 out of 1874 genes, 2.0%	0.315098
oxidation-reduction process	52 out of 189 genes, 27.5%	484 out of 1874 genes, 25.8%	0.315782
chromatin organization	6 out of 189 genes, 3.2%	46 out of 1874 genes, 2.5%	0.316388
coenzyme biosynthetic process	6 out of 189 genes, 3.2%	46 out of 1874 genes, 2.5%	0.316388
organic acid metabolic process	46 out of 189 genes, 24.3%	426 out of 1874 genes, 22.7%	0.317571
oxoacid metabolic process	46 out of 189 genes, 24.3%	426 out of 1874 genes, 22.7%	0.317571
organic substance biosynthetic process	85 out of 189 genes, 45.0%	808 out of 1874 genes, 43.1%	0.319767
aging	3 out of 189 genes, 1.6%	20 out of 1874 genes, 1.1%	0.327814
pollination	3 out of 189 genes, 1.6%	20 out of 1874 genes, 1.1%	0.327814
cellular hormone metabolic process	3 out of 189 genes, 1.6%	20 out of 1874 genes, 1.1%	0.327814
multi-multicellular organism process	3 out of 189 genes, 1.6%	20 out of 1874 genes, 1.1%	0.327814
glycerolipid biosynthetic process	3 out of 189 genes, 1.6%	20 out of 1874 genes, 1.1%	0.327814
glycerophospholipid biosynthetic process	3 out of 189 genes, 1.6%	20 out of 1874 genes, 1.1%	0.327814
response to carbohydrate stimulus	8 out of 189 genes, 4.2%	65 out of 1874 genes, 3.5%	0.330156
biosynthetic process	88 out of 189 genes, 46.6%	840 out of 1874 genes, 44.8%	0.333286
cellular nitrogen compound biosynthetic process	29 out of 189 genes, 15.3%	264 out of 1874 genes, 14.1%	0.333366
regulation of nucleobase-containing compound metabolic process	13 out of 189 genes, 6.9%	112 out of 1874 genes, 6.0%	0.336646
PSII associated light-harvesting complex II catabolic process	2 out of 189 genes, 1.1%	12 out of 1874 genes, 0.6%	0.345059
programmed cell death	2 out of 189 genes, 1.1%	12 out of 1874 genes, 0.6%	0.345059
positive regulation of cellular component organization	2 out of 189 genes, 1.1%	12 out of 1874 genes, 0.6%	0.345059
monocarboxylic acid biosynthetic process	11 out of 189 genes, 5.8%	94 out of 1874 genes, 5.0%	0.346495
protein targeting	13 out of 189 genes, 6.9%	113 out of 1874 genes, 6.0%	0.348889
chloroplast relocation	7 out of 189 genes, 3.7%	57 out of 1874 genes, 3.0%	0.350118
plastid localization	7 out of 189 genes, 3.7%	57 out of 1874 genes, 3.0%	0.350118
establishment of organelle localization	7 out of 189 genes, 3.7%	57 out of 1874 genes, 3.0%	0.350118
establishment of plastid localization	7 out of 189 genes, 3.7%	57 out of 1874 genes, 3.0%	0.350118
nucleoside phosphate metabolic process	27 out of 189 genes, 14.3%	247 out of 1874 genes, 13.2%	0.352152
nucleotide metabolic process	27 out of 189 genes, 14.3%	247 out of 1874 genes, 13.2%	0.352152
regulation of primary metabolic process	18 out of 189 genes, 9.5%	161 out of 1874 genes, 8.6%	0.354963
nucleobase-containing small molecule metabolic process	28 out of 189 genes, 14.8%	257 out of 1874 genes, 13.7%	0.355261
acyl-CoA metabolic process	3 out of 189 genes, 1.6%	21 out of 1874 genes, 1.1%	0.356729
response to UV	3 out of 189 genes, 1.6%	21 out of 1874 genes, 1.1%	0.356729
jasmonic acid metabolic process	3 out of 189 genes, 1.6%	21 out of 1874 genes, 1.1%	0.356729
jasmonic acid biosynthetic process	3 out of 189 genes, 1.6%	21 out of 1874 genes, 1.1%	0.356729
thioester metabolic process	3 out of 189 genes, 1.6%	21 out of 1874 genes, 1.1%	0.356729
regulation of developmental process	9 out of 189 genes, 4.8%	76 out of 1874 genes, 4.1%	0.35677
hormone metabolic process	5 out of 189 genes, 2.6%	39 out of 1874 genes, 2.1%	0.356865
regulation of nitrogen compound metabolic process	13 out of 189 genes, 6.9%	114 out of 1874 genes, 6.1%	0.361218
response to osmotic stress	20 out of 189 genes, 10.6%	181 out of 1874 genes, 9.7%	0.36384
reproductive structure development	18 out of 189 genes, 9.5%	162 out of 1874 genes, 8.6%	0.365447
reproductive system development	18 out of 189 genes, 9.5%	162 out of 1874 genes, 8.6%	0.365447
single-organism transport	32 out of 189 genes, 16.9%	297 out of 1874 genes, 15.8%	0.366265
cellular macromolecule localization	15 out of 189 genes, 7.9%	134 out of 1874 genes, 7.2%	0.372865
negative regulation of biological process	10 out of 189 genes, 5.3%	87 out of 1874 genes, 4.6%	0.380027
regulation of flower development	4 out of 189 genes, 2.1%	31 out of 1874 genes, 1.7%	0.382464
transcription from plastid promoter	4 out of 189 genes, 2.1%	31 out of 1874 genes, 1.7%	0.382464
RNA splicing, via transesterification reactions	2 out of 189 genes, 1.1%	13 out of 1874 genes, 0.7%	0.383105
RNA splicing, via transesterification reactions with bulged adenosine as nucleophile	2 out of 189 genes, 1.1%	13 out of 1874 genes, 0.7%	0.383105
mRNA splicing, via spliceosome	2 out of 189 genes, 1.1%	13 out of 1874 genes, 0.7%	0.383105
phosphatidylglycerol biosynthetic process	2 out of 189 genes, 1.1%	13 out of 1874 genes, 0.7%	0.383105
microtubule nucleation	2 out of 189 genes, 1.1%	13 out of 1874 genes, 0.7%	0.383105
regulation of anion transport	2 out of 189 genes, 1.1%	13 out of 1874 genes, 0.7%	0.383105
phosphatidylglycerol metabolic process	2 out of 189 genes, 1.1%	13 out of 1874 genes, 0.7%	0.383105
cellular response to abscisic acid stimulus	2 out of 189 genes, 1.1%	13 out of 1874 genes, 0.7%	0.383105
nitrogen compound metabolic process	66 out of 189 genes, 34.9%	632 out of 1874 genes, 33.7%	0.385143
photosynthesis, light harvesting	3 out of 189 genes, 1.6%	22 out of 1874 genes, 1.2%	0.38548
protein modification by small protein removal	3 out of 189 genes, 1.6%	22 out of 1874 genes, 1.2%	0.38548
response to karrikin	3 out of 189 genes, 1.6%	22 out of 1874 genes, 1.2%	0.38548
regulation of metabolic process	25 out of 189 genes, 13.2%	232 out of 1874 genes, 12.4%	0.390387
intracellular protein transport	14 out of 189 genes, 7.4%	126 out of 1874 genes, 6.7%	0.391343
cellular protein localization	14 out of 189 genes, 7.4%	126 out of 1874 genes, 6.7%	0.391343
regulation of phosphate metabolic process	6 out of 189 genes, 3.2%	50 out of 1874 genes, 2.7%	0.391619
regulation of phosphorus metabolic process	6 out of 189 genes, 3.2%	50 out of 1874 genes, 2.7%	0.391619
regulation of biological process	47 out of 189 genes, 24.9%	447 out of 1874 genes, 23.9%	0.394769
organophosphate biosynthetic process	24 out of 189 genes, 12.7%	223 out of 1874 genes, 11.9%	0.396765
cellular component organization or biogenesis	55 out of 189 genes, 29.1%	526 out of 1874 genes, 28.1%	0.398601
gynoecium development	5 out of 189 genes, 2.6%	41 out of 1874 genes, 2.2%	0.39885
response to external stimulus	7 out of 189 genes, 3.7%	60 out of 1874 genes, 3.2%	0.402074
macromolecule localization	18 out of 189 genes, 9.5%	166 out of 1874 genes, 8.9%	0.407895
single-organism biosynthetic process	31 out of 189 genes, 16.4%	293 out of 1874 genes, 15.6%	0.413292
cell wall polysaccharide metabolic process	3 out of 189 genes, 1.6%	23 out of 1874 genes, 1.2%	0.41393
transport	36 out of 189 genes, 19.0%	342 out of 1874 genes, 18.2%	0.414405
G2 phase of mitotic cell cycle	2 out of 189 genes, 1.1%	14 out of 1874 genes, 0.7%	0.42018
protein deneddylation	2 out of 189 genes, 1.1%	14 out of 1874 genes, 0.7%	0.42018
protein targeting to mitochondrion	2 out of 189 genes, 1.1%	14 out of 1874 genes, 0.7%	0.42018
branched-chain amino acid metabolic process	2 out of 189 genes, 1.1%	14 out of 1874 genes, 0.7%	0.42018
carbohydrate mediated signaling	2 out of 189 genes, 1.1%	14 out of 1874 genes, 0.7%	0.42018
sugar mediated signaling pathway	2 out of 189 genes, 1.1%	14 out of 1874 genes, 0.7%	0.42018
cullin deneddylation	2 out of 189 genes, 1.1%	14 out of 1874 genes, 0.7%	0.42018
hemicellulose metabolic process	2 out of 189 genes, 1.1%	14 out of 1874 genes, 0.7%	0.42018
phytosteroid biosynthetic process	2 out of 189 genes, 1.1%	14 out of 1874 genes, 0.7%	0.42018
brassinosteroid biosynthetic process	2 out of 189 genes, 1.1%	14 out of 1874 genes, 0.7%	0.42018
RNA interference	2 out of 189 genes, 1.1%	14 out of 1874 genes, 0.7%	0.42018
regulation of lipid metabolic process	2 out of 189 genes, 1.1%	14 out of 1874 genes, 0.7%	0.42018
production of siRNA involved in RNA interference	2 out of 189 genes, 1.1%	14 out of 1874 genes, 0.7%	0.42018
dsRNA fragmentation	2 out of 189 genes, 1.1%	14 out of 1874 genes, 0.7%	0.42018
posttranscriptional gene silencing by RNA	2 out of 189 genes, 1.1%	14 out of 1874 genes, 0.7%	0.42018
gene silencing by miRNA	2 out of 189 genes, 1.1%	14 out of 1874 genes, 0.7%	0.42018
production of miRNAs involved in gene silencing by miRNA	2 out of 189 genes, 1.1%	14 out of 1874 genes, 0.7%	0.42018
response to dsRNA	2 out of 189 genes, 1.1%	14 out of 1874 genes, 0.7%	0.42018
G2 phase	2 out of 189 genes, 1.1%	14 out of 1874 genes, 0.7%	0.42018
interphase	2 out of 189 genes, 1.1%	14 out of 1874 genes, 0.7%	0.42018
interphase of mitotic cell cycle	2 out of 189 genes, 1.1%	14 out of 1874 genes, 0.7%	0.42018
protein localization to mitochondrion	2 out of 189 genes, 1.1%	14 out of 1874 genes, 0.7%	0.42018
production of small RNA involved in gene silencing by RNA	2 out of 189 genes, 1.1%	14 out of 1874 genes, 0.7%	0.42018
cellular response to carbohydrate stimulus	2 out of 189 genes, 1.1%	14 out of 1874 genes, 0.7%	0.42018
cellular response to dsRNA	2 out of 189 genes, 1.1%	14 out of 1874 genes, 0.7%	0.42018
establishment of protein localization to mitochondrion	2 out of 189 genes, 1.1%	14 out of 1874 genes, 0.7%	0.42018
establishment of localization	40 out of 189 genes, 21.2%	382 out of 1874 genes, 20.4%	0.420792
cellular amino acid metabolic process	25 out of 189 genes, 13.2%	236 out of 1874 genes, 12.6%	0.427054
organic cyclic compound metabolic process	59 out of 189 genes, 31.2%	570 out of 1874 genes, 30.4%	0.429613
proteasomal ubiquitin-dependent protein catabolic process	4 out of 189 genes, 2.1%	33 out of 1874 genes, 1.8%	0.4301
regulation of reproductive process	4 out of 189 genes, 2.1%	33 out of 1874 genes, 1.8%	0.4301
reproductive process	20 out of 189 genes, 10.6%	188 out of 1874 genes, 10.0%	0.434709
regulation of gene expression, epigenetic	3 out of 189 genes, 1.6%	24 out of 1874 genes, 1.3%	0.441958
multi-organism reproductive process	3 out of 189 genes, 1.6%	24 out of 1874 genes, 1.3%	0.441958
developmental process involved in reproduction	19 out of 189 genes, 10.1%	179 out of 1874 genes, 9.6%	0.442572
organelle organization	34 out of 189 genes, 18.0%	326 out of 1874 genes, 17.4%	0.443121
anatomical structure morphogenesis	16 out of 189 genes, 8.5%	150 out of 1874 genes, 8.0%	0.445723
floral organ development	6 out of 189 genes, 3.2%	53 out of 1874 genes, 2.8%	0.448139
chromosome organization	6 out of 189 genes, 3.2%	53 out of 1874 genes, 2.8%	0.448139
organophosphate metabolic process	34 out of 189 genes, 18.0%	327 out of 1874 genes, 17.4%	0.451222
embryo development	10 out of 189 genes, 5.3%	92 out of 1874 genes, 4.9%	0.451719
protein targeting to chloroplast	4 out of 189 genes, 2.1%	34 out of 1874 genes, 1.8%	0.45358
establishment of protein localization to chloroplast	4 out of 189 genes, 2.1%	34 out of 1874 genes, 1.8%	0.45358
protein localization to chloroplast	4 out of 189 genes, 2.1%	34 out of 1874 genes, 1.8%	0.45358
organelle localization	7 out of 189 genes, 3.7%	63 out of 1874 genes, 3.4%	0.45398
protein localization	15 out of 189 genes, 7.9%	141 out of 1874 genes, 7.5%	0.45457
protein transport	15 out of 189 genes, 7.9%	141 out of 1874 genes, 7.5%	0.45457
establishment of protein localization	15 out of 189 genes, 7.9%	141 out of 1874 genes, 7.5%	0.45457
calcium ion transport	2 out of 189 genes, 1.1%	15 out of 1874 genes, 0.8%	0.456092
response to ethylene stimulus	2 out of 189 genes, 1.1%	15 out of 1874 genes, 0.8%	0.456092
phytosteroid metabolic process	2 out of 189 genes, 1.1%	15 out of 1874 genes, 0.8%	0.456092
brassinosteroid metabolic process	2 out of 189 genes, 1.1%	15 out of 1874 genes, 0.8%	0.456092
regulation of cellular component size	2 out of 189 genes, 1.1%	15 out of 1874 genes, 0.8%	0.456092
tube development	2 out of 189 genes, 1.1%	15 out of 1874 genes, 0.8%	0.456092
pollen tube development	2 out of 189 genes, 1.1%	15 out of 1874 genes, 0.8%	0.456092
regulation of anatomical structure size	2 out of 189 genes, 1.1%	15 out of 1874 genes, 0.8%	0.456092
transmembrane transport	9 out of 189 genes, 4.8%	83 out of 1874 genes, 4.4%	0.462637
organic substance transport	19 out of 189 genes, 10.1%	181 out of 1874 genes, 9.7%	0.463498
GTP catabolic process	3 out of 189 genes, 1.6%	25 out of 1874 genes, 1.3%	0.46946
RNA splicing	3 out of 189 genes, 1.6%	25 out of 1874 genes, 1.3%	0.46946
photomorphogenesis	3 out of 189 genes, 1.6%	25 out of 1874 genes, 1.3%	0.46946
gene silencing	3 out of 189 genes, 1.6%	25 out of 1874 genes, 1.3%	0.46946
histone modification	3 out of 189 genes, 1.6%	25 out of 1874 genes, 1.3%	0.46946
guanosine-containing compound catabolic process	3 out of 189 genes, 1.6%	25 out of 1874 genes, 1.3%	0.46946
cellular aromatic compound metabolic process	55 out of 189 genes, 29.1%	537 out of 1874 genes, 28.7%	0.473073
cellular nitrogen compound metabolic process	55 out of 189 genes, 29.1%	537 out of 1874 genes, 28.7%	0.473073
localization	41 out of 189 genes, 21.7%	399 out of 1874 genes, 21.3%	0.474922
hormone biosynthetic process	4 out of 189 genes, 2.1%	35 out of 1874 genes, 1.9%	0.476743
cell wall organization	7 out of 189 genes, 3.7%	65 out of 1874 genes, 3.5%	0.488135
mitochondrial transport	2 out of 189 genes, 1.1%	16 out of 1874 genes, 0.9%	0.4907
cellular response to starvation	2 out of 189 genes, 1.1%	16 out of 1874 genes, 0.9%	0.4907
auxin polar transport	2 out of 189 genes, 1.1%	16 out of 1874 genes, 0.9%	0.4907
posttranscriptional gene silencing	2 out of 189 genes, 1.1%	16 out of 1874 genes, 0.9%	0.4907
response to starvation	2 out of 189 genes, 1.1%	16 out of 1874 genes, 0.9%	0.4907
cellular response to nitrogen compound	2 out of 189 genes, 1.1%	16 out of 1874 genes, 0.9%	0.4907
plastid membrane organization	9 out of 189 genes, 4.8%	85 out of 1874 genes, 4.5%	0.492585
thylakoid membrane organization	9 out of 189 genes, 4.8%	85 out of 1874 genes, 4.5%	0.492585
response to fructose stimulus	3 out of 189 genes, 1.6%	26 out of 1874 genes, 1.4%	0.496347
external encapsulating structure organization	7 out of 189 genes, 3.7%	66 out of 1874 genes, 3.5%	0.504992
organ development	19 out of 189 genes, 10.1%	185 out of 1874 genes, 9.9%	0.505162
reproduction	20 out of 189 genes, 10.6%	195 out of 1874 genes, 10.4%	0.506047
S-glycoside metabolic process	5 out of 189 genes, 2.6%	47 out of 1874 genes, 2.5%	0.521616
glycosinolate metabolic process	5 out of 189 genes, 2.6%	47 out of 1874 genes, 2.5%	0.521616
glucosinolate metabolic process	5 out of 189 genes, 2.6%	47 out of 1874 genes, 2.5%	0.521616
dicarboxylic acid metabolic process	4 out of 189 genes, 2.1%	37 out of 1874 genes, 2.0%	0.521884
cation transport	9 out of 189 genes, 4.8%	87 out of 1874 genes, 4.6%	0.522105
vitamin metabolic process	3 out of 189 genes, 1.6%	27 out of 1874 genes, 1.4%	0.522542
cellular modified amino acid biosynthetic process	3 out of 189 genes, 1.6%	27 out of 1874 genes, 1.4%	0.522542
regionalization	2 out of 189 genes, 1.1%	17 out of 1874 genes, 0.9%	0.523899
response to nutrient levels	2 out of 189 genes, 1.1%	17 out of 1874 genes, 0.9%	0.523899
cellular response to nutrient levels	2 out of 189 genes, 1.1%	17 out of 1874 genes, 0.9%	0.523899
plasma membrane ATP synthesis coupled proton transport	2 out of 189 genes, 1.1%	17 out of 1874 genes, 0.9%	0.523899
phosphorus metabolic process	44 out of 189 genes, 23.3%	437 out of 1874 genes, 23.3%	0.5363
flower development	7 out of 189 genes, 3.7%	68 out of 1874 genes, 3.6%	0.538141
small molecule metabolic process	65 out of 189 genes, 34.4%	646 out of 1874 genes, 34.5%	0.539233
alpha-amino acid catabolic process	5 out of 189 genes, 2.6%	48 out of 1874 genes, 2.6%	0.541125
water transport	4 out of 189 genes, 2.1%	38 out of 1874 genes, 2.0%	0.543762
fluid transport	4 out of 189 genes, 2.1%	38 out of 1874 genes, 2.0%	0.543762
glycerophospholipid metabolic process	3 out of 189 genes, 1.6%	28 out of 1874 genes, 1.5%	0.547984
microtubule-based process	3 out of 189 genes, 1.6%	28 out of 1874 genes, 1.5%	0.547984
plant-type cell wall biogenesis	3 out of 189 genes, 1.6%	28 out of 1874 genes, 1.5%	0.547984
GTP metabolic process	3 out of 189 genes, 1.6%	28 out of 1874 genes, 1.5%	0.547984
glycolysis	9 out of 189 genes, 4.8%	89 out of 1874 genes, 4.7%	0.551059
mRNA processing	2 out of 189 genes, 1.1%	18 out of 1874 genes, 1.0%	0.55562
mitochondrion organization	2 out of 189 genes, 1.1%	18 out of 1874 genes, 1.0%	0.55562
histone lysine methylation	2 out of 189 genes, 1.1%	18 out of 1874 genes, 1.0%	0.55562
anatomical structure formation involved in morphogenesis	2 out of 189 genes, 1.1%	18 out of 1874 genes, 1.0%	0.55562
starch biosynthetic process	6 out of 189 genes, 3.2%	59 out of 1874 genes, 3.1%	0.55687
floral whorl development	5 out of 189 genes, 2.6%	49 out of 1874 genes, 2.6%	0.560263
phosphate-containing compound metabolic process	42 out of 189 genes, 22.2%	421 out of 1874 genes, 22.5%	0.564797
plant-type ovary development	4 out of 189 genes, 2.1%	39 out of 1874 genes, 2.1%	0.565121
carpel development	4 out of 189 genes, 2.1%	39 out of 1874 genes, 2.1%	0.565121
ovule development	4 out of 189 genes, 2.1%	39 out of 1874 genes, 2.1%	0.565121
root system development	7 out of 189 genes, 3.7%	70 out of 1874 genes, 3.7%	0.570385
root development	7 out of 189 genes, 3.7%	70 out of 1874 genes, 3.7%	0.570385
glycerolipid metabolic process	3 out of 189 genes, 1.6%	29 out of 1874 genes, 1.5%	0.572622
post-embryonic organ development	6 out of 189 genes, 3.2%	60 out of 1874 genes, 3.2%	0.57407
cellular amino acid catabolic process	5 out of 189 genes, 2.6%	50 out of 1874 genes, 2.7%	0.579001
proteasomal protein catabolic process	5 out of 189 genes, 2.6%	50 out of 1874 genes, 2.7%	0.579001
cellular component organization	47 out of 189 genes, 24.9%	473 out of 1874 genes, 25.2%	0.579779
cellular carbohydrate metabolic process	14 out of 189 genes, 7.4%	142 out of 1874 genes, 7.6%	0.581776
response to hormone stimulus	12 out of 189 genes, 6.3%	122 out of 1874 genes, 6.5%	0.585265
lactate metabolic process	2 out of 189 genes, 1.1%	19 out of 1874 genes, 1.0%	0.585824
methylglyoxal metabolic process	2 out of 189 genes, 1.1%	19 out of 1874 genes, 1.0%	0.585824
indoleacetic acid metabolic process	2 out of 189 genes, 1.1%	19 out of 1874 genes, 1.0%	0.585824
indoleacetic acid biosynthetic process	2 out of 189 genes, 1.1%	19 out of 1874 genes, 1.0%	0.585824
hormone transport	2 out of 189 genes, 1.1%	19 out of 1874 genes, 1.0%	0.585824
sterol metabolic process	2 out of 189 genes, 1.1%	19 out of 1874 genes, 1.0%	0.585824
sterol biosynthetic process	2 out of 189 genes, 1.1%	19 out of 1874 genes, 1.0%	0.585824
methylglyoxal catabolic process to D-lactate	2 out of 189 genes, 1.1%	19 out of 1874 genes, 1.0%	0.585824
aldehyde catabolic process	2 out of 189 genes, 1.1%	19 out of 1874 genes, 1.0%	0.585824
methylglyoxal catabolic process	2 out of 189 genes, 1.1%	19 out of 1874 genes, 1.0%	0.585824
auxin transport	2 out of 189 genes, 1.1%	19 out of 1874 genes, 1.0%	0.585824
organonitrogen compound metabolic process	47 out of 189 genes, 24.9%	474 out of 1874 genes, 25.3%	0.586711
cellular metabolic compound salvage	6 out of 189 genes, 3.2%	61 out of 1874 genes, 3.3%	0.59094
chromatin modification	3 out of 189 genes, 1.6%	30 out of 1874 genes, 1.6%	0.596418
covalent chromatin modification	3 out of 189 genes, 1.6%	30 out of 1874 genes, 1.6%	0.596418
guanosine-containing compound metabolic process	3 out of 189 genes, 1.6%	30 out of 1874 genes, 1.6%	0.596418
response to organic substance	25 out of 189 genes, 13.2%	255 out of 1874 genes, 13.6%	0.599482
starch metabolic process	7 out of 189 genes, 3.7%	72 out of 1874 genes, 3.8%	0.601569
positive regulation of catalytic activity	4 out of 189 genes, 2.1%	41 out of 1874 genes, 2.2%	0.606153
positive regulation of molecular function	4 out of 189 genes, 2.1%	41 out of 1874 genes, 2.2%	0.606153
response to endogenous stimulus	12 out of 189 genes, 6.3%	124 out of 1874 genes, 6.6%	0.609194
glucan biosynthetic process	8 out of 189 genes, 4.2%	83 out of 1874 genes, 4.4%	0.611242
carbohydrate derivative metabolic process	28 out of 189 genes, 14.8%	287 out of 1874 genes, 15.3%	0.613961
microtubule cytoskeleton organization	2 out of 189 genes, 1.1%	20 out of 1874 genes, 1.1%	0.614492
mitotic cell cycle	2 out of 189 genes, 1.1%	20 out of 1874 genes, 1.1%	0.614492
translational initiation	2 out of 189 genes, 1.1%	20 out of 1874 genes, 1.1%	0.614492
regulation of meristem growth	2 out of 189 genes, 1.1%	20 out of 1874 genes, 1.1%	0.614492
cellular response to alcohol	2 out of 189 genes, 1.1%	20 out of 1874 genes, 1.1%	0.614492
phenylpropanoid metabolic process	3 out of 189 genes, 1.6%	31 out of 1874 genes, 1.7%	0.619341
seed development	9 out of 189 genes, 4.8%	94 out of 1874 genes, 5.0%	0.620178
regulation of hormone levels	6 out of 189 genes, 3.2%	63 out of 1874 genes, 3.4%	0.623618
secondary metabolite biosynthetic process	6 out of 189 genes, 3.2%	63 out of 1874 genes, 3.4%	0.623618
hyperosmotic response	3 out of 189 genes, 1.6%	32 out of 1874 genes, 1.7%	0.641373
ion transmembrane transport	3 out of 189 genes, 1.6%	32 out of 1874 genes, 1.7%	0.641373
protein methylation	2 out of 189 genes, 1.1%	21 out of 1874 genes, 1.1%	0.641625
protein alkylation	2 out of 189 genes, 1.1%	21 out of 1874 genes, 1.1%	0.641625
embryo sac development	2 out of 189 genes, 1.1%	21 out of 1874 genes, 1.1%	0.641625
response to auxin stimulus	2 out of 189 genes, 1.1%	21 out of 1874 genes, 1.1%	0.641625
auxin biosynthetic process	2 out of 189 genes, 1.1%	21 out of 1874 genes, 1.1%	0.641625
histone methylation	2 out of 189 genes, 1.1%	21 out of 1874 genes, 1.1%	0.641625
regulation of meristem development	2 out of 189 genes, 1.1%	21 out of 1874 genes, 1.1%	0.641625
fruit development	9 out of 189 genes, 4.8%	96 out of 1874 genes, 5.1%	0.646263
nucleobase-containing compound biosynthetic process	14 out of 189 genes, 7.4%	148 out of 1874 genes, 7.9%	0.647364
amine metabolic process	5 out of 189 genes, 2.6%	54 out of 1874 genes, 2.9%	0.649498
root morphogenesis	5 out of 189 genes, 2.6%	54 out of 1874 genes, 2.9%	0.649498
cell differentiation	9 out of 189 genes, 4.8%	97 out of 1874 genes, 5.2%	0.658931
negative regulation of gene expression	3 out of 189 genes, 1.6%	33 out of 1874 genes, 1.8%	0.6625
Golgi organization	4 out of 189 genes, 2.1%	44 out of 1874 genes, 2.3%	0.663122
aromatic amino acid family metabolic process	5 out of 189 genes, 2.6%	55 out of 1874 genes, 2.9%	0.665923
photorespiration	5 out of 189 genes, 2.6%	55 out of 1874 genes, 2.9%	0.665923
polysaccharide catabolic process	2 out of 189 genes, 1.1%	22 out of 1874 genes, 1.2%	0.667239
energy coupled proton transport, down electrochemical gradient	2 out of 189 genes, 1.1%	22 out of 1874 genes, 1.2%	0.667239
ATP synthesis coupled proton transport	2 out of 189 genes, 1.1%	22 out of 1874 genes, 1.2%	0.667239
regulation of catalytic activity	6 out of 189 genes, 3.2%	66 out of 1874 genes, 3.5%	0.669754
organic substance catabolic process	40 out of 189 genes, 21.2%	417 out of 1874 genes, 22.3%	0.67744
carbohydrate metabolic process	39 out of 189 genes, 20.6%	408 out of 1874 genes, 21.8%	0.684892
single-organism carbohydrate metabolic process	32 out of 189 genes, 16.9%	337 out of 1874 genes, 18.0%	0.685724
steroid biosynthetic process	2 out of 189 genes, 1.1%	23 out of 1874 genes, 1.2%	0.691364
auxin metabolic process	2 out of 189 genes, 1.1%	23 out of 1874 genes, 1.2%	0.691364
cellular biogenic amine catabolic process	2 out of 189 genes, 1.1%	23 out of 1874 genes, 1.2%	0.691364
cellular response to lipid	2 out of 189 genes, 1.1%	23 out of 1874 genes, 1.2%	0.691364
embryo development ending in seed dormancy	7 out of 189 genes, 3.7%	79 out of 1874 genes, 4.2%	0.700731
steroid metabolic process	2 out of 189 genes, 1.1%	24 out of 1874 genes, 1.3%	0.714037
single-organism metabolic process	91 out of 189 genes, 48.1%	935 out of 1874 genes, 49.9%	0.719908
cellular modified amino acid metabolic process	3 out of 189 genes, 1.6%	36 out of 1874 genes, 1.9%	0.720437
catabolic process	42 out of 189 genes, 22.2%	445 out of 1874 genes, 23.7%	0.726135
negative regulation of metabolic process	4 out of 189 genes, 2.1%	48 out of 1874 genes, 2.6%	0.730022
cellular glucan metabolic process	10 out of 189 genes, 5.3%	114 out of 1874 genes, 6.1%	0.73172
amine catabolic process	2 out of 189 genes, 1.1%	25 out of 1874 genes, 1.3%	0.735305
indole-containing compound metabolic process	2 out of 189 genes, 1.1%	25 out of 1874 genes, 1.3%	0.735305
indole-containing compound biosynthetic process	2 out of 189 genes, 1.1%	25 out of 1874 genes, 1.3%	0.735305
ion transport	9 out of 189 genes, 4.8%	104 out of 1874 genes, 5.5%	0.740024
glucan metabolic process	10 out of 189 genes, 5.3%	115 out of 1874 genes, 6.1%	0.741937
establishment of localization in cell	20 out of 189 genes, 10.6%	221 out of 1874 genes, 11.8%	0.741946
cellular membrane organization	9 out of 189 genes, 4.8%	105 out of 1874 genes, 5.6%	0.750477
membrane organization	9 out of 189 genes, 4.8%	105 out of 1874 genes, 5.6%	0.750477
negative regulation of macromolecule metabolic process	3 out of 189 genes, 1.6%	38 out of 1874 genes, 2.0%	0.754602
regulation of ion transport	3 out of 189 genes, 1.6%	38 out of 1874 genes, 2.0%	0.754602
pyrimidine-containing compound metabolic process	3 out of 189 genes, 1.6%	38 out of 1874 genes, 2.0%	0.754602
glutamine family amino acid metabolic process	2 out of 189 genes, 1.1%	26 out of 1874 genes, 1.4%	0.755218
aromatic amino acid family biosynthetic process	2 out of 189 genes, 1.1%	26 out of 1874 genes, 1.4%	0.755218
response to wounding	2 out of 189 genes, 1.1%	26 out of 1874 genes, 1.4%	0.755218
cell cycle phase	2 out of 189 genes, 1.1%	26 out of 1874 genes, 1.4%	0.755218
cellular polysaccharide biosynthetic process	8 out of 189 genes, 4.2%	95 out of 1874 genes, 5.1%	0.760334
regulation of molecular function	6 out of 189 genes, 3.2%	73 out of 1874 genes, 3.9%	0.762786
establishment of protein localization to organelle	6 out of 189 genes, 3.2%	73 out of 1874 genes, 3.9%	0.762786
cellular localization	21 out of 189 genes, 11.1%	235 out of 1874 genes, 12.5%	0.76754
meristem development	3 out of 189 genes, 1.6%	39 out of 1874 genes, 2.1%	0.770392
intracellular transport	15 out of 189 genes, 7.9%	172 out of 1874 genes, 9.2%	0.771508
response to abscisic acid stimulus	4 out of 189 genes, 2.1%	51 out of 1874 genes, 2.7%	0.773365
meristem maintenance	2 out of 189 genes, 1.1%	27 out of 1874 genes, 1.4%	0.773832
response to water deprivation	3 out of 189 genes, 1.6%	40 out of 1874 genes, 2.1%	0.785348
gametophyte development	3 out of 189 genes, 1.6%	40 out of 1874 genes, 2.1%	0.785348
regulation of transport	3 out of 189 genes, 1.6%	40 out of 1874 genes, 2.1%	0.785348
secondary metabolic process	10 out of 189 genes, 5.3%	120 out of 1874 genes, 6.4%	0.789103
ATP biosynthetic process	2 out of 189 genes, 1.1%	28 out of 1874 genes, 1.5%	0.791205
response to water stimulus	3 out of 189 genes, 1.6%	41 out of 1874 genes, 2.2%	0.799495
single organism reproductive process	2 out of 189 genes, 1.1%	29 out of 1874 genes, 1.5%	0.807396
cellular carbohydrate biosynthetic process	8 out of 189 genes, 4.2%	100 out of 1874 genes, 5.3%	0.808973
DNA metabolic process	4 out of 189 genes, 2.1%	54 out of 1874 genes, 2.9%	0.811085
polysaccharide metabolic process	11 out of 189 genes, 5.8%	135 out of 1874 genes, 7.2%	0.821264
cellular polysaccharide metabolic process	10 out of 189 genes, 5.3%	124 out of 1874 genes, 6.6%	0.822153
iron-sulfur cluster assembly	2 out of 189 genes, 1.1%	30 out of 1874 genes, 1.6%	0.822466
metallo-sulfur cluster assembly	2 out of 189 genes, 1.1%	30 out of 1874 genes, 1.6%	0.822466
S-glycoside biosynthetic process	3 out of 189 genes, 1.6%	43 out of 1874 genes, 2.3%	0.825465
glycosinolate biosynthetic process	3 out of 189 genes, 1.6%	43 out of 1874 genes, 2.3%	0.825465
glucosinolate biosynthetic process	3 out of 189 genes, 1.6%	43 out of 1874 genes, 2.3%	0.825465
organonitrogen compound catabolic process	9 out of 189 genes, 4.8%	114 out of 1874 genes, 6.1%	0.831624
purine ribonucleotide metabolic process	6 out of 189 genes, 3.2%	80 out of 1874 genes, 4.3%	0.835129
hydrogen transport	2 out of 189 genes, 1.1%	31 out of 1874 genes, 1.7%	0.836475
purine nucleoside triphosphate biosynthetic process	2 out of 189 genes, 1.1%	31 out of 1874 genes, 1.7%	0.836475
purine ribonucleoside triphosphate biosynthetic process	2 out of 189 genes, 1.1%	31 out of 1874 genes, 1.7%	0.836475
proton transport	2 out of 189 genes, 1.1%	31 out of 1874 genes, 1.7%	0.836475
regulation of cellular component organization	2 out of 189 genes, 1.1%	31 out of 1874 genes, 1.7%	0.836475
maltose metabolic process	3 out of 189 genes, 1.6%	44 out of 1874 genes, 2.3%	0.837344
purine nucleoside catabolic process	3 out of 189 genes, 1.6%	44 out of 1874 genes, 2.3%	0.837344
purine nucleotide catabolic process	3 out of 189 genes, 1.6%	44 out of 1874 genes, 2.3%	0.837344
nucleoside triphosphate catabolic process	3 out of 189 genes, 1.6%	44 out of 1874 genes, 2.3%	0.837344
purine nucleoside triphosphate catabolic process	3 out of 189 genes, 1.6%	44 out of 1874 genes, 2.3%	0.837344
purine ribonucleotide catabolic process	3 out of 189 genes, 1.6%	44 out of 1874 genes, 2.3%	0.837344
nucleoside catabolic process	3 out of 189 genes, 1.6%	44 out of 1874 genes, 2.3%	0.837344
nucleotide catabolic process	3 out of 189 genes, 1.6%	44 out of 1874 genes, 2.3%	0.837344
ribonucleoside triphosphate catabolic process	3 out of 189 genes, 1.6%	44 out of 1874 genes, 2.3%	0.837344
purine ribonucleoside triphosphate catabolic process	3 out of 189 genes, 1.6%	44 out of 1874 genes, 2.3%	0.837344
ribonucleotide catabolic process	3 out of 189 genes, 1.6%	44 out of 1874 genes, 2.3%	0.837344
ribonucleoside catabolic process	3 out of 189 genes, 1.6%	44 out of 1874 genes, 2.3%	0.837344
purine ribonucleoside catabolic process	3 out of 189 genes, 1.6%	44 out of 1874 genes, 2.3%	0.837344
purine-containing compound catabolic process	3 out of 189 genes, 1.6%	44 out of 1874 genes, 2.3%	0.837344
nucleoside phosphate catabolic process	3 out of 189 genes, 1.6%	44 out of 1874 genes, 2.3%	0.837344
polysaccharide biosynthetic process	8 out of 189 genes, 4.2%	104 out of 1874 genes, 5.5%	0.842243
purine nucleoside triphosphate metabolic process	5 out of 189 genes, 2.6%	69 out of 1874 genes, 3.7%	0.842599
purine ribonucleoside triphosphate metabolic process	5 out of 189 genes, 2.6%	69 out of 1874 genes, 3.7%	0.842599
response to alcohol	4 out of 189 genes, 2.1%	57 out of 1874 genes, 3.0%	0.843554
cellular developmental process	9 out of 189 genes, 4.8%	116 out of 1874 genes, 6.2%	0.846586
organophosphate catabolic process	3 out of 189 genes, 1.6%	45 out of 1874 genes, 2.4%	0.848524
glycosyl compound catabolic process	3 out of 189 genes, 1.6%	45 out of 1874 genes, 2.4%	0.848524
cellular biogenic amine metabolic process	2 out of 189 genes, 1.1%	32 out of 1874 genes, 1.7%	0.849481
nucleoside triphosphate biosynthetic process	2 out of 189 genes, 1.1%	32 out of 1874 genes, 1.7%	0.849481
ribonucleoside triphosphate biosynthetic process	2 out of 189 genes, 1.1%	32 out of 1874 genes, 1.7%	0.849481
pyrimidine ribonucleotide metabolic process	2 out of 189 genes, 1.1%	32 out of 1874 genes, 1.7%	0.849481
pyrimidine ribonucleotide biosynthetic process	2 out of 189 genes, 1.1%	32 out of 1874 genes, 1.7%	0.849481
cellular amine metabolic process	2 out of 189 genes, 1.1%	32 out of 1874 genes, 1.7%	0.849481
regulation of developmental growth	2 out of 189 genes, 1.1%	32 out of 1874 genes, 1.7%	0.849481
ribonucleoside triphosphate metabolic process	5 out of 189 genes, 2.6%	70 out of 1874 genes, 3.7%	0.851608
organic acid catabolic process	6 out of 189 genes, 3.2%	82 out of 1874 genes, 4.4%	0.852229
carboxylic acid catabolic process	6 out of 189 genes, 3.2%	82 out of 1874 genes, 4.4%	0.852229
gluconeogenesis	4 out of 189 genes, 2.1%	58 out of 1874 genes, 3.1%	0.853287
hexose biosynthetic process	4 out of 189 genes, 2.1%	58 out of 1874 genes, 3.1%	0.853287
glycosyl compound metabolic process	10 out of 189 genes, 5.3%	129 out of 1874 genes, 6.9%	0.857821
nucleoside triphosphate metabolic process	5 out of 189 genes, 2.6%	71 out of 1874 genes, 3.8%	0.860188
small molecule catabolic process	6 out of 189 genes, 3.2%	83 out of 1874 genes, 4.4%	0.860224
single-organism catabolic process	6 out of 189 genes, 3.2%	83 out of 1874 genes, 4.4%	0.860224
response to topologically incorrect protein	4 out of 189 genes, 2.1%	59 out of 1874 genes, 3.1%	0.862506
regulation of localization	3 out of 189 genes, 1.6%	47 out of 1874 genes, 2.5%	0.868903
carbohydrate derivative catabolic process	3 out of 189 genes, 1.6%	47 out of 1874 genes, 2.5%	0.868903
response to lipid	4 out of 189 genes, 2.1%	60 out of 1874 genes, 3.2%	0.871229
pyrimidine nucleotide metabolic process	2 out of 189 genes, 1.1%	34 out of 1874 genes, 1.8%	0.872721
pyrimidine nucleotide biosynthetic process	2 out of 189 genes, 1.1%	34 out of 1874 genes, 1.8%	0.872721
protein phosphorylation	2 out of 189 genes, 1.1%	34 out of 1874 genes, 1.8%	0.872721
regulation of growth	2 out of 189 genes, 1.1%	34 out of 1874 genes, 1.8%	0.872721
vegetative to reproductive phase transition of meristem	3 out of 189 genes, 1.6%	48 out of 1874 genes, 2.6%	0.878162
monosaccharide biosynthetic process	4 out of 189 genes, 2.1%	61 out of 1874 genes, 3.3%	0.879474
nucleoside metabolic process	6 out of 189 genes, 3.2%	86 out of 1874 genes, 4.6%	0.88211
negative regulation of cellular metabolic process	2 out of 189 genes, 1.1%	35 out of 1874 genes, 1.9%	0.883066
disaccharide metabolic process	3 out of 189 genes, 1.6%	49 out of 1874 genes, 2.6%	0.886839
alcohol biosynthetic process	2 out of 189 genes, 1.1%	36 out of 1874 genes, 1.9%	0.892633
developmental cell growth	2 out of 189 genes, 1.1%	36 out of 1874 genes, 1.9%	0.892633
pyrimidine-containing compound biosynthetic process	2 out of 189 genes, 1.1%	36 out of 1874 genes, 1.9%	0.892633
organic hydroxy compound biosynthetic process	2 out of 189 genes, 1.1%	36 out of 1874 genes, 1.9%	0.892633
negative regulation of cellular process	3 out of 189 genes, 1.6%	51 out of 1874 genes, 2.7%	0.902563
ribonucleotide metabolic process	7 out of 189 genes, 3.7%	102 out of 1874 genes, 5.4%	0.905693
ribose phosphate metabolic process	7 out of 189 genes, 3.7%	102 out of 1874 genes, 5.4%	0.905693
ribonucleotide biosynthetic process	4 out of 189 genes, 2.1%	65 out of 1874 genes, 3.5%	0.90806
ribose phosphate biosynthetic process	4 out of 189 genes, 2.1%	65 out of 1874 genes, 3.5%	0.90806
mRNA metabolic process	2 out of 189 genes, 1.1%	38 out of 1874 genes, 2.0%	0.909631
nitrogen compound transport	2 out of 189 genes, 1.1%	38 out of 1874 genes, 2.0%	0.909631
protein localization to organelle	6 out of 189 genes, 3.2%	91 out of 1874 genes, 4.9%	0.912198
carbohydrate biosynthetic process	13 out of 189 genes, 6.9%	174 out of 1874 genes, 9.3%	0.913389
cellular protein catabolic process	7 out of 189 genes, 3.7%	104 out of 1874 genes, 5.5%	0.915847
oligosaccharide metabolic process	3 out of 189 genes, 1.6%	53 out of 1874 genes, 2.8%	0.916299
nucleobase-containing compound catabolic process	3 out of 189 genes, 1.6%	53 out of 1874 genes, 2.8%	0.916299
purine nucleotide metabolic process	6 out of 189 genes, 3.2%	92 out of 1874 genes, 4.9%	0.917352
purine nucleoside metabolic process	5 out of 189 genes, 2.6%	80 out of 1874 genes, 4.3%	0.92032
purine ribonucleoside metabolic process	5 out of 189 genes, 2.6%	80 out of 1874 genes, 4.3%	0.92032
purine ribonucleotide biosynthetic process	2 out of 189 genes, 1.1%	40 out of 1874 genes, 2.1%	0.924095
purine nucleoside biosynthetic process	2 out of 189 genes, 1.1%	40 out of 1874 genes, 2.1%	0.924095
purine ribonucleoside biosynthetic process	2 out of 189 genes, 1.1%	40 out of 1874 genes, 2.1%	0.924095
ribonucleoside metabolic process	5 out of 189 genes, 2.6%	81 out of 1874 genes, 4.3%	0.92535
cytoskeleton organization	3 out of 189 genes, 1.6%	55 out of 1874 genes, 2.9%	0.928258
nucleoside biosynthetic process	2 out of 189 genes, 1.1%	41 out of 1874 genes, 2.2%	0.930484
ribonucleoside biosynthetic process	2 out of 189 genes, 1.1%	41 out of 1874 genes, 2.2%	0.930484
ATP metabolic process	2 out of 189 genes, 1.1%	41 out of 1874 genes, 2.2%	0.930484
phosphorylation	7 out of 189 genes, 3.7%	108 out of 1874 genes, 5.8%	0.933375
proteasome assembly	3 out of 189 genes, 1.6%	56 out of 1874 genes, 3.0%	0.933634
response to misfolded protein	3 out of 189 genes, 1.6%	56 out of 1874 genes, 3.0%	0.933634
glycosyl compound biosynthetic process	5 out of 189 genes, 2.6%	83 out of 1874 genes, 4.4%	0.934578
monovalent inorganic cation transport	2 out of 189 genes, 1.1%	42 out of 1874 genes, 2.2%	0.936366
root epidermal cell differentiation	2 out of 189 genes, 1.1%	43 out of 1874 genes, 2.3%	0.941775
protein catabolic process	7 out of 189 genes, 3.7%	111 out of 1874 genes, 5.9%	0.944349
purine-containing compound metabolic process	6 out of 189 genes, 3.2%	99 out of 1874 genes, 5.3%	0.946618
cytoplasmic transport	7 out of 189 genes, 3.7%	112 out of 1874 genes, 6.0%	0.947636
tissue development	5 out of 189 genes, 2.6%	87 out of 1874 genes, 4.6%	0.950046
developmental growth involved in morphogenesis	2 out of 189 genes, 1.1%	45 out of 1874 genes, 2.4%	0.951317
nucleotide biosynthetic process	6 out of 189 genes, 3.2%	101 out of 1874 genes, 5.4%	0.953082
nucleoside phosphate biosynthetic process	6 out of 189 genes, 3.2%	101 out of 1874 genes, 5.4%	0.953082
ubiquitin-dependent protein catabolic process	4 out of 189 genes, 2.1%	75 out of 1874 genes, 4.0%	0.955017
cell cycle process	2 out of 189 genes, 1.1%	46 out of 1874 genes, 2.5%	0.955512
aromatic compound catabolic process	4 out of 189 genes, 2.1%	76 out of 1874 genes, 4.1%	0.958234
modification-dependent protein catabolic process	4 out of 189 genes, 2.1%	76 out of 1874 genes, 4.1%	0.958234
modification-dependent macromolecule catabolic process	4 out of 189 genes, 2.1%	76 out of 1874 genes, 4.1%	0.958234
cellular macromolecule catabolic process	7 out of 189 genes, 3.7%	116 out of 1874 genes, 6.2%	0.959132
cell cycle	2 out of 189 genes, 1.1%	47 out of 1874 genes, 2.5%	0.959361
developmental growth	2 out of 189 genes, 1.1%	48 out of 1874 genes, 2.6%	0.962891
macromolecule catabolic process	9 out of 189 genes, 4.8%	143 out of 1874 genes, 7.6%	0.963446
proteolysis involved in cellular protein catabolic process	5 out of 189 genes, 2.6%	92 out of 1874 genes, 4.9%	0.964714
epidermis development	2 out of 189 genes, 1.1%	49 out of 1874 genes, 2.6%	0.966128
epidermal cell differentiation	2 out of 189 genes, 1.1%	49 out of 1874 genes, 2.6%	0.966128
cellular nitrogen compound catabolic process	4 out of 189 genes, 2.1%	79 out of 1874 genes, 4.2%	0.966658
purine nucleotide biosynthetic process	2 out of 189 genes, 1.1%	50 out of 1874 genes, 2.7%	0.969093
heterocycle catabolic process	4 out of 189 genes, 2.1%	80 out of 1874 genes, 4.3%	0.969097
organic cyclic compound catabolic process	4 out of 189 genes, 2.1%	81 out of 1874 genes, 4.3%	0.971369
cellular catabolic process	19 out of 189 genes, 10.1%	268 out of 1874 genes, 14.3%	0.973281
alcohol metabolic process	2 out of 189 genes, 1.1%	52 out of 1874 genes, 2.8%	0.974294
cell development	2 out of 189 genes, 1.1%	52 out of 1874 genes, 2.8%	0.974294
proteasome core complex assembly	2 out of 189 genes, 1.1%	52 out of 1874 genes, 2.8%	0.974294
organic hydroxy compound metabolic process	2 out of 189 genes, 1.1%	52 out of 1874 genes, 2.8%	0.974294
purine-containing compound biosynthetic process	2 out of 189 genes, 1.1%	55 out of 1874 genes, 2.9%	0.98055
proteolysis	10 out of 189 genes, 5.3%	172 out of 1874 genes, 9.2%	0.986492
carbohydrate derivative biosynthetic process	8 out of 189 genes, 4.2%	150 out of 1874 genes, 8.0%	0.98963
vesicle-mediated transport	2 out of 189 genes, 1.1%	62 out of 1874 genes, 3.3%	0.989959
cell growth	2 out of 189 genes, 1.1%	63 out of 1874 genes, 3.4%	0.990874
growth	2 out of 189 genes, 1.1%	69 out of 1874 genes, 3.7%	0.994883

## Sheet: cellular component
Gene Ontology term	Cluster frequency	Protein frequency of use	P-value
membrane	129 out of 189 genes, 68.3%	912 out of 1875 genes, 48.6%	7.61243e-09
ribosome	39 out of 189 genes, 20.6%	163 out of 1875 genes, 8.7%	4.81657e-08
cytosolic ribosome	31 out of 189 genes, 16.4%	120 out of 1875 genes, 6.4%	2.3023e-07
ribonucleoprotein complex	41 out of 189 genes, 21.7%	186 out of 1875 genes, 9.9%	2.48437e-07
cytosolic part	31 out of 189 genes, 16.4%	133 out of 1875 genes, 7.1%	2.71978e-06
non-membrane-bounded organelle	50 out of 189 genes, 26.5%	281 out of 1875 genes, 15.0%	1.03885e-05
intracellular non-membrane-bounded organelle	50 out of 189 genes, 26.5%	281 out of 1875 genes, 15.0%	1.03885e-05
macromolecular complex	68 out of 189 genes, 36.0%	433 out of 1875 genes, 23.1%	1.57887e-05
ribosomal subunit	21 out of 189 genes, 11.1%	82 out of 1875 genes, 4.4%	2.92423e-05
photosystem	13 out of 189 genes, 6.9%	42 out of 1875 genes, 2.2%	0.000135106
intracellular organelle part	119 out of 189 genes, 63.0%	946 out of 1875 genes, 50.5%	0.000179891
organelle part	119 out of 189 genes, 63.0%	948 out of 1875 genes, 50.6%	0.000202232
plasma membrane	71 out of 189 genes, 37.6%	493 out of 1875 genes, 26.3%	0.000217198
cell periphery	81 out of 189 genes, 42.9%	606 out of 1875 genes, 32.3%	0.000881211
storage vacuole	3 out of 189 genes, 1.6%	3 out of 1875 genes, 0.2%	0.00100961
protein storage vacuole	3 out of 189 genes, 1.6%	3 out of 1875 genes, 0.2%	0.00100961
cytosolic small ribosomal subunit	8 out of 189 genes, 4.2%	23 out of 1875 genes, 1.2%	0.00119071
thylakoid	48 out of 189 genes, 25.4%	319 out of 1875 genes, 17.0%	0.00133072
apoplast	31 out of 189 genes, 16.4%	181 out of 1875 genes, 9.7%	0.0014063
vacuole	38 out of 189 genes, 20.1%	239 out of 1875 genes, 12.7%	0.00169547
thylakoid lumen	13 out of 189 genes, 6.9%	55 out of 1875 genes, 2.9%	0.00234085
small ribosomal subunit	9 out of 189 genes, 4.8%	31 out of 1875 genes, 1.7%	0.00249984
large ribosomal subunit	12 out of 189 genes, 6.3%	51 out of 1875 genes, 2.7%	0.0035813
photosystem I reaction center	3 out of 189 genes, 1.6%	4 out of 1875 genes, 0.2%	0.00373749
thylakoid part	36 out of 189 genes, 19.0%	234 out of 1875 genes, 12.5%	0.00413833
nucleolus	24 out of 189 genes, 12.7%	139 out of 1875 genes, 7.4%	0.0045582
photosystem II	8 out of 189 genes, 4.2%	28 out of 1875 genes, 1.5%	0.00484406
organelle lumen	27 out of 189 genes, 14.3%	166 out of 1875 genes, 8.9%	0.00623057
intracellular organelle lumen	27 out of 189 genes, 14.3%	166 out of 1875 genes, 8.9%	0.00623057
membrane-enclosed lumen	27 out of 189 genes, 14.3%	168 out of 1875 genes, 9.0%	0.00736254
organellar ribosome	3 out of 189 genes, 1.6%	5 out of 1875 genes, 0.3%	0.00865089
plastid ribosome	3 out of 189 genes, 1.6%	5 out of 1875 genes, 0.3%	0.00865089
chloroplast thylakoid lumen	9 out of 189 genes, 4.8%	37 out of 1875 genes, 2.0%	0.00903209
plastid thylakoid lumen	9 out of 189 genes, 4.8%	37 out of 1875 genes, 2.0%	0.00903209
chloroplast thylakoid	37 out of 189 genes, 19.6%	255 out of 1875 genes, 13.6%	0.00993169
plastid thylakoid	37 out of 189 genes, 19.6%	255 out of 1875 genes, 13.6%	0.00993169
organelle subcompartment	37 out of 189 genes, 19.6%	255 out of 1875 genes, 13.6%	0.00993169
lytic vacuole within protein storage vacuole	2 out of 189 genes, 1.1%	2 out of 1875 genes, 0.1%	0.0101123
photosynthetic membrane	32 out of 189 genes, 16.9%	215 out of 1875 genes, 11.5%	0.0115129
nuclear lumen	24 out of 189 genes, 12.7%	150 out of 1875 genes, 8.0%	0.0120997
chloroplast part	76 out of 189 genes, 40.2%	613 out of 1875 genes, 32.7%	0.013346
plastid part	76 out of 189 genes, 40.2%	614 out of 1875 genes, 32.7%	0.0139338
chloroplast stromal thylakoid	3 out of 189 genes, 1.6%	6 out of 1875 genes, 0.3%	0.0160254
photosystem I	5 out of 189 genes, 2.6%	16 out of 1875 genes, 0.9%	0.0170939
cell wall	31 out of 189 genes, 16.4%	215 out of 1875 genes, 11.5%	0.0200254
external encapsulating structure	31 out of 189 genes, 16.4%	215 out of 1875 genes, 11.5%	0.0200254
cytosol	69 out of 189 genes, 36.5%	557 out of 1875 genes, 29.7%	0.0202871
plastoglobule	9 out of 189 genes, 4.8%	42 out of 1875 genes, 2.2%	0.020778
cytosolic large ribosomal subunit	9 out of 189 genes, 4.8%	42 out of 1875 genes, 2.2%	0.020778
plastid envelope	41 out of 189 genes, 21.7%	304 out of 1875 genes, 16.2%	0.0227478
extracellular region	37 out of 189 genes, 19.6%	269 out of 1875 genes, 14.3%	0.0229159
thylakoid membrane	30 out of 189 genes, 15.9%	209 out of 1875 genes, 11.1%	0.0234144
chloroplast thylakoid membrane	29 out of 189 genes, 15.3%	201 out of 1875 genes, 10.7%	0.024151
plastid thylakoid membrane	29 out of 189 genes, 15.3%	201 out of 1875 genes, 10.7%	0.024151
cytoplasmic part	165 out of 189 genes, 87.3%	1537 out of 1875 genes, 82.0%	0.0248315
lytic vacuole	2 out of 189 genes, 1.1%	3 out of 1875 genes, 0.2%	0.0283176
nuclear part	24 out of 189 genes, 12.7%	165 out of 1875 genes, 8.8%	0.0359554
chloroplast envelope	39 out of 189 genes, 20.6%	296 out of 1875 genes, 15.8%	0.0371952
Golgi apparatus	19 out of 189 genes, 10.1%	124 out of 1875 genes, 6.6%	0.037291
chloroplast stroma	47 out of 189 genes, 24.9%	369 out of 1875 genes, 19.7%	0.0387842
organelle envelope	48 out of 189 genes, 25.4%	380 out of 1875 genes, 20.3%	0.0420605
envelope	48 out of 189 genes, 25.4%	380 out of 1875 genes, 20.3%	0.0420605
oxygen evolving complex	4 out of 189 genes, 2.1%	14 out of 1875 genes, 0.7%	0.0446177
plastid stroma	47 out of 189 genes, 24.9%	373 out of 1875 genes, 19.9%	0.0460461
chloroplast	108 out of 189 genes, 57.1%	959 out of 1875 genes, 51.1%	0.0480318
chloroplast photosystem II	3 out of 189 genes, 1.6%	9 out of 1875 genes, 0.5%	0.0536172
cell-cell junction	17 out of 189 genes, 9.0%	113 out of 1875 genes, 6.0%	0.055293
plasmodesma	17 out of 189 genes, 9.0%	113 out of 1875 genes, 6.0%	0.055293
symplast	17 out of 189 genes, 9.0%	113 out of 1875 genes, 6.0%	0.055293
stromule	7 out of 189 genes, 3.7%	35 out of 1875 genes, 1.9%	0.0554356
plastid	110 out of 189 genes, 58.2%	990 out of 1875 genes, 52.8%	0.0676171
cell junction	17 out of 189 genes, 9.0%	116 out of 1875 genes, 6.2%	0.0679978
vacuolar part	17 out of 189 genes, 9.0%	116 out of 1875 genes, 6.2%	0.0679978
intracellular organelle	163 out of 189 genes, 86.2%	1544 out of 1875 genes, 82.3%	0.080873
magnesium chelatase complex	2 out of 189 genes, 1.1%	5 out of 1875 genes, 0.3%	0.0823956
organelle	163 out of 189 genes, 86.2%	1545 out of 1875 genes, 82.4%	0.0838559
chromatin	3 out of 189 genes, 1.6%	11 out of 1875 genes, 0.6%	0.0907028
Golgi apparatus part	3 out of 189 genes, 1.6%	11 out of 1875 genes, 0.6%	0.0907028
vacuolar membrane	16 out of 189 genes, 8.5%	115 out of 1875 genes, 6.1%	0.108704
cytoplasm	170 out of 189 genes, 89.9%	1629 out of 1875 genes, 86.9%	0.112098
chromosomal part	3 out of 189 genes, 1.6%	12 out of 1875 genes, 0.6%	0.112308
light-harvesting complex	2 out of 189 genes, 1.1%	7 out of 1875 genes, 0.4%	0.151419
intracellular membrane-bounded organelle	158 out of 189 genes, 83.6%	1516 out of 1875 genes, 80.9%	0.181067
membrane-bounded organelle	158 out of 189 genes, 83.6%	1517 out of 1875 genes, 80.9%	0.186192
Golgi membrane	2 out of 189 genes, 1.1%	8 out of 1875 genes, 0.4%	0.189044
membrane part	29 out of 189 genes, 15.3%	245 out of 1875 genes, 13.1%	0.191686
endoplasmic reticulum	9 out of 189 genes, 4.8%	66 out of 1875 genes, 3.5%	0.214474
organelle membrane	25 out of 189 genes, 13.2%	212 out of 1875 genes, 11.3%	0.220946
nucleosome	2 out of 189 genes, 1.1%	9 out of 1875 genes, 0.5%	0.227737
nuclear body	2 out of 189 genes, 1.1%	9 out of 1875 genes, 0.5%	0.227737
protein-DNA complex	2 out of 189 genes, 1.1%	9 out of 1875 genes, 0.5%	0.227737
plant-type vacuole	3 out of 189 genes, 1.6%	17 out of 1875 genes, 0.9%	0.241454
nucleus	51 out of 189 genes, 27.0%	465 out of 1875 genes, 24.8%	0.257434
nucleoid	3 out of 189 genes, 1.6%	18 out of 1875 genes, 1.0%	0.269851
mitochondrial outer membrane	2 out of 189 genes, 1.1%	11 out of 1875 genes, 0.6%	0.306061
mitochondrial matrix	2 out of 189 genes, 1.1%	12 out of 1875 genes, 0.6%	0.344811
chromosome	3 out of 189 genes, 1.6%	21 out of 1875 genes, 1.1%	0.356406
cell	186 out of 189 genes, 98.4%	1833 out of 1875 genes, 97.8%	0.374668
cell part	186 out of 189 genes, 98.4%	1833 out of 1875 genes, 97.8%	0.374668
nucleoplasm part	2 out of 189 genes, 1.1%	13 out of 1875 genes, 0.7%	0.382841
anchored to plasma membrane	4 out of 189 genes, 2.1%	32 out of 1875 genes, 1.7%	0.405963
anchored to membrane	5 out of 189 genes, 2.6%	42 out of 1875 genes, 2.2%	0.419303
intrinsic to membrane	14 out of 189 genes, 7.4%	129 out of 1875 genes, 6.9%	0.426773
intrinsic to plasma membrane	4 out of 189 genes, 2.1%	33 out of 1875 genes, 1.8%	0.429683
protein complex	27 out of 189 genes, 14.3%	256 out of 1875 genes, 13.7%	0.430003
mitochondrial part	9 out of 189 genes, 4.8%	82 out of 1875 genes, 4.4%	0.446888
integral to membrane	10 out of 189 genes, 5.3%	92 out of 1875 genes, 4.9%	0.451016
nucleoplasm	2 out of 189 genes, 1.1%	15 out of 1875 genes, 0.8%	0.455805
extrinsic to membrane	2 out of 189 genes, 1.1%	15 out of 1875 genes, 0.8%	0.455805
mitochondrial envelope	8 out of 189 genes, 4.2%	73 out of 1875 genes, 3.9%	0.458073
plasma membrane part	5 out of 189 genes, 2.6%	44 out of 1875 genes, 2.3%	0.460721
mitochondrion	38 out of 189 genes, 20.1%	375 out of 1875 genes, 20.0%	0.516818
intracellular part	173 out of 189 genes, 91.5%	1717 out of 1875 genes, 91.6%	0.574631
proteasome core complex	2 out of 189 genes, 1.1%	19 out of 1875 genes, 1.0%	0.585518
intracellular	174 out of 189 genes, 92.1%	1728 out of 1875 genes, 92.2%	0.589203
mitochondrial respiratory chain complex I	2 out of 189 genes, 1.1%	20 out of 1875 genes, 1.1%	0.614186
cytoskeleton	3 out of 189 genes, 1.6%	31 out of 1875 genes, 1.7%	0.618962
mitochondrial membrane	6 out of 189 genes, 3.2%	64 out of 1875 genes, 3.4%	0.638855
plant-type cell wall	7 out of 189 genes, 3.7%	75 out of 1875 genes, 4.0%	0.645501
NADH dehydrogenase complex	2 out of 189 genes, 1.1%	22 out of 1875 genes, 1.2%	0.666939
respiratory chain complex I	2 out of 189 genes, 1.1%	22 out of 1875 genes, 1.2%	0.666939
endomembrane system	3 out of 189 genes, 1.6%	35 out of 1875 genes, 1.9%	0.701667
microtubule cytoskeleton	2 out of 189 genes, 1.1%	24 out of 1875 genes, 1.3%	0.713747
cytoplasmic membrane-bounded vesicle	4 out of 189 genes, 2.1%	49 out of 1875 genes, 2.6%	0.744718
cytoplasmic vesicle	4 out of 189 genes, 2.1%	49 out of 1875 genes, 2.6%	0.744718
outer membrane	2 out of 189 genes, 1.1%	26 out of 1875 genes, 1.4%	0.754942
organelle outer membrane	2 out of 189 genes, 1.1%	26 out of 1875 genes, 1.4%	0.754942
vesicle	4 out of 189 genes, 2.1%	50 out of 1875 genes, 2.7%	0.759171
membrane-bounded vesicle	4 out of 189 genes, 2.1%	50 out of 1875 genes, 2.7%	0.759171
cytoskeletal part	2 out of 189 genes, 1.1%	28 out of 1875 genes, 1.5%	0.790945
mitochondrial inner membrane	4 out of 189 genes, 2.1%	53 out of 1875 genes, 2.8%	0.79876
organelle inner membrane	5 out of 189 genes, 2.6%	67 out of 1875 genes, 3.6%	0.822875
peroxisome	4 out of 189 genes, 2.1%	56 out of 1875 genes, 3.0%	0.832964
microbody	4 out of 189 genes, 2.1%	56 out of 1875 genes, 3.0%	0.832964
mitochondrial respiratory chain	2 out of 189 genes, 1.1%	31 out of 1875 genes, 1.7%	0.836243
proteasome complex	2 out of 189 genes, 1.1%	32 out of 1875 genes, 1.7%	0.849259
respiratory chain	2 out of 189 genes, 1.1%	34 out of 1875 genes, 1.8%	0.872519
mitochondrial membrane part	2 out of 189 genes, 1.1%	41 out of 1875 genes, 2.2%	0.930345

## Sheet: molecular function
Gene Ontology term	Cluster frequency	Protein frequency of use	P-value
structural constituent of ribosome	25 out of 175 genes, 14.3%	117 out of 1768 genes, 6.6%	9.54993e-05
structural molecule activity	28 out of 175 genes, 16.0%	144 out of 1768 genes, 8.1%	0.000204825
nutrient reservoir activity	4 out of 175 genes, 2.3%	6 out of 1768 genes, 0.3%	0.00118794
translation elongation factor activity	5 out of 175 genes, 2.9%	14 out of 1768 genes, 0.8%	0.0085539
manganese ion binding	3 out of 175 genes, 1.7%	6 out of 1768 genes, 0.3%	0.0152254
peptidyl-prolyl cis-trans isomerase activity	6 out of 175 genes, 3.4%	23 out of 1768 genes, 1.3%	0.0208152
cis-trans isomerase activity	6 out of 175 genes, 3.4%	23 out of 1768 genes, 1.3%	0.0208152
channel activity	4 out of 175 genes, 2.3%	12 out of 1768 genes, 0.7%	0.0243277
passive transmembrane transporter activity	4 out of 175 genes, 2.3%	12 out of 1768 genes, 0.7%	0.0243277
substrate-specific channel activity	4 out of 175 genes, 2.3%	12 out of 1768 genes, 0.7%	0.0243277
protein disulfide oxidoreductase activity	6 out of 175 genes, 3.4%	24 out of 1768 genes, 1.4%	0.0255371
cobalt ion binding	6 out of 175 genes, 3.4%	24 out of 1768 genes, 1.4%	0.0255371
aminomethyltransferase activity	2 out of 175 genes, 1.1%	3 out of 1768 genes, 0.2%	0.0273312
electron transporter, transferring electrons within cytochrome b6/f complex of photosystem II activity	2 out of 175 genes, 1.1%	3 out of 1768 genes, 0.2%	0.0273312
malate dehydrogenase activity	4 out of 175 genes, 2.3%	13 out of 1768 genes, 0.7%	0.0324866
phosphogluconate dehydrogenase (decarboxylating) activity	3 out of 175 genes, 1.7%	8 out of 1768 genes, 0.5%	0.0367271
water transmembrane transporter activity	2 out of 175 genes, 1.1%	4 out of 1768 genes, 0.2%	0.0511222
3-hydroxyisobutyrate dehydrogenase activity	2 out of 175 genes, 1.1%	4 out of 1768 genes, 0.2%	0.0511222
water channel activity	2 out of 175 genes, 1.1%	4 out of 1768 genes, 0.2%	0.0511222
superoxide dismutase activity	3 out of 175 genes, 1.7%	9 out of 1768 genes, 0.5%	0.0511652
macrolide binding	3 out of 175 genes, 1.7%	9 out of 1768 genes, 0.5%	0.0511652
FK506 binding	3 out of 175 genes, 1.7%	9 out of 1768 genes, 0.5%	0.0511652
oxidoreductase activity, acting on superoxide radicals as acceptor	3 out of 175 genes, 1.7%	9 out of 1768 genes, 0.5%	0.0511652
isomerase activity	13 out of 175 genes, 7.4%	83 out of 1768 genes, 4.7%	0.0597198
drug binding	3 out of 175 genes, 1.7%	10 out of 1768 genes, 0.6%	0.0679132
disulfide oxidoreductase activity	6 out of 175 genes, 3.4%	30 out of 1768 genes, 1.7%	0.068647
protochlorophyllide reductase activity	2 out of 175 genes, 1.1%	5 out of 1768 genes, 0.3%	0.0797326
electron carrier activity	11 out of 175 genes, 6.3%	71 out of 1768 genes, 4.0%	0.0850045
chlorophyll binding	3 out of 175 genes, 1.7%	11 out of 1768 genes, 0.6%	0.0868001
oxidoreductase activity, acting on a sulfur group of donors	7 out of 175 genes, 4.0%	41 out of 1768 genes, 2.3%	0.103283
oxidoreductase activity, acting on the CH-CH group of donors, NAD or NADP as acceptor	9 out of 175 genes, 5.1%	57 out of 1768 genes, 3.2%	0.10329
nucleic acid binding transcription factor activity	3 out of 175 genes, 1.7%	12 out of 1768 genes, 0.7%	0.107624
sequence-specific DNA binding transcription factor activity	3 out of 175 genes, 1.7%	12 out of 1768 genes, 0.7%	0.107624
oligosaccharyl transferase activity	2 out of 175 genes, 1.1%	6 out of 1768 genes, 0.3%	0.111986
dolichyl-diphosphooligosaccharide-protein glycotransferase activity	2 out of 175 genes, 1.1%	6 out of 1768 genes, 0.3%	0.111986
anion channel activity	2 out of 175 genes, 1.1%	6 out of 1768 genes, 0.3%	0.111986
voltage-gated anion channel activity	2 out of 175 genes, 1.1%	6 out of 1768 genes, 0.3%	0.111986
oxidoreductase activity, acting on the aldehyde or oxo group of donors, disulfide as acceptor	2 out of 175 genes, 1.1%	6 out of 1768 genes, 0.3%	0.111986
L-ascorbate peroxidase activity	2 out of 175 genes, 1.1%	6 out of 1768 genes, 0.3%	0.111986
magnesium chelatase activity	2 out of 175 genes, 1.1%	6 out of 1768 genes, 0.3%	0.111986
ligase activity, forming nitrogen-metal bonds	2 out of 175 genes, 1.1%	6 out of 1768 genes, 0.3%	0.111986
ligase activity, forming nitrogen-metal bonds, forming coordination complexes	2 out of 175 genes, 1.1%	6 out of 1768 genes, 0.3%	0.111986
tetrapyrrole binding	8 out of 175 genes, 4.6%	50 out of 1768 genes, 2.8%	0.113867
2-alkenal reductase [NAD(P)] activity	7 out of 175 genes, 4.0%	43 out of 1768 genes, 2.4%	0.125508
cation binding	49 out of 175 genes, 28.0%	428 out of 1768 genes, 24.2%	0.127676
antioxidant activity	7 out of 175 genes, 4.0%	44 out of 1768 genes, 2.5%	0.137467
unfolded protein binding	7 out of 175 genes, 4.0%	44 out of 1768 genes, 2.5%	0.137467
voltage-gated ion channel activity	2 out of 175 genes, 1.1%	7 out of 1768 genes, 0.4%	0.14689
voltage-gated channel activity	2 out of 175 genes, 1.1%	7 out of 1768 genes, 0.4%	0.14689
gated channel activity	2 out of 175 genes, 1.1%	7 out of 1768 genes, 0.4%	0.14689
ion gated channel activity	2 out of 175 genes, 1.1%	7 out of 1768 genes, 0.4%	0.14689
L-malate dehydrogenase activity	2 out of 175 genes, 1.1%	7 out of 1768 genes, 0.4%	0.14689
ribonucleoprotein complex binding	2 out of 175 genes, 1.1%	7 out of 1768 genes, 0.4%	0.14689
ribosome binding	2 out of 175 genes, 1.1%	7 out of 1768 genes, 0.4%	0.14689
protein binding	28 out of 175 genes, 16.0%	234 out of 1768 genes, 13.2%	0.153986
intramolecular oxidoreductase activity	4 out of 175 genes, 2.3%	22 out of 1768 genes, 1.2%	0.166335
oxidoreductase activity, acting on the aldehyde or oxo group of donors	5 out of 175 genes, 2.9%	30 out of 1768 genes, 1.7%	0.168684
ion channel activity	2 out of 175 genes, 1.1%	8 out of 1768 genes, 0.5%	0.183612
cysteine-type peptidase activity	2 out of 175 genes, 1.1%	8 out of 1768 genes, 0.5%	0.183612
amide binding	2 out of 175 genes, 1.1%	8 out of 1768 genes, 0.5%	0.183612
metal ion binding	45 out of 175 genes, 25.7%	403 out of 1768 genes, 22.8%	0.189831
oxidoreductase activity	45 out of 175 genes, 25.7%	405 out of 1768 genes, 22.9%	0.200363
nucleotidyltransferase activity	3 out of 175 genes, 1.7%	16 out of 1768 genes, 0.9%	0.205791
calcium ion binding	6 out of 175 genes, 3.4%	41 out of 1768 genes, 2.3%	0.213904
RNA binding	18 out of 175 genes, 10.3%	150 out of 1768 genes, 8.5%	0.220087
protein disulfide isomerase activity	2 out of 175 genes, 1.1%	9 out of 1768 genes, 0.5%	0.221453
intramolecular oxidoreductase activity, interconverting aldoses and ketoses	2 out of 175 genes, 1.1%	9 out of 1768 genes, 0.5%	0.221453
intramolecular oxidoreductase activity, transposing S-S bonds	2 out of 175 genes, 1.1%	9 out of 1768 genes, 0.5%	0.221453
vitamin binding	2 out of 175 genes, 1.1%	9 out of 1768 genes, 0.5%	0.221453
2 iron, 2 sulfur cluster binding	2 out of 175 genes, 1.1%	9 out of 1768 genes, 0.5%	0.221453
copper ion binding	13 out of 175 genes, 7.4%	104 out of 1768 genes, 5.9%	0.222221
oxidoreductase activity, acting on the CH-CH group of donors	9 out of 175 genes, 5.1%	69 out of 1768 genes, 3.9%	0.237596
poly-pyrimidine tract binding	2 out of 175 genes, 1.1%	10 out of 1768 genes, 0.6%	0.259838
poly(U) RNA binding	2 out of 175 genes, 1.1%	10 out of 1768 genes, 0.6%	0.259838
oxidoreductase activity, acting on a sulfur group of donors, NAD(P) as acceptor	2 out of 175 genes, 1.1%	10 out of 1768 genes, 0.6%	0.259838
rRNA binding	3 out of 175 genes, 1.7%	18 out of 1768 genes, 1.0%	0.260625
transition metal ion binding	27 out of 175 genes, 15.4%	241 out of 1768 genes, 13.6%	0.265031
transaminase activity	3 out of 175 genes, 1.7%	19 out of 1768 genes, 1.1%	0.288741
transferase activity, transferring nitrogenous groups	3 out of 175 genes, 1.7%	19 out of 1768 genes, 1.1%	0.288741
intramolecular oxidoreductase activity, interconverting keto- and enol-groups	2 out of 175 genes, 1.1%	11 out of 1768 genes, 0.6%	0.298291
translation factor activity, nucleic acid binding	5 out of 175 genes, 2.9%	37 out of 1768 genes, 2.1%	0.300911
identical protein binding	4 out of 175 genes, 2.3%	29 out of 1768 genes, 1.6%	0.321567
binding	119 out of 175 genes, 68.0%	1170 out of 1768 genes, 66.2%	0.327429
single-stranded RNA binding	2 out of 175 genes, 1.1%	12 out of 1768 genes, 0.7%	0.336425
iron-sulfur cluster binding	4 out of 175 genes, 2.3%	30 out of 1768 genes, 1.7%	0.345087
metal cluster binding	4 out of 175 genes, 2.3%	30 out of 1768 genes, 1.7%	0.345087
phospholipid binding	3 out of 175 genes, 1.7%	21 out of 1768 genes, 1.2%	0.345457
heme binding	5 out of 175 genes, 2.9%	40 out of 1768 genes, 2.3%	0.362265
methyltransferase activity	4 out of 175 genes, 2.3%	31 out of 1768 genes, 1.8%	0.36865
anion transmembrane transporter activity	2 out of 175 genes, 1.1%	13 out of 1768 genes, 0.7%	0.373926
lipid binding	4 out of 175 genes, 2.3%	32 out of 1768 genes, 1.8%	0.392169
oxidoreductase activity, acting on the CH-OH group of donors, NAD or NADP as acceptor	9 out of 175 genes, 5.1%	80 out of 1768 genes, 4.5%	0.394708
carboxy-lyase activity	3 out of 175 genes, 1.7%	23 out of 1768 genes, 1.3%	0.401785
4 iron, 4 sulfur cluster binding	2 out of 175 genes, 1.1%	14 out of 1768 genes, 0.8%	0.410548
transferase activity, transferring one-carbon groups	4 out of 175 genes, 2.3%	33 out of 1768 genes, 1.9%	0.415565
transporter activity	12 out of 175 genes, 6.9%	111 out of 1768 genes, 6.3%	0.41849
oxidoreductase activity, acting on the aldehyde or oxo group of donors, NAD or NADP as acceptor	3 out of 175 genes, 1.7%	24 out of 1768 genes, 1.4%	0.429474
cofactor binding	16 out of 175 genes, 9.1%	153 out of 1768 genes, 8.7%	0.447547
nucleic acid binding	25 out of 175 genes, 14.3%	244 out of 1768 genes, 13.8%	0.459104
oxidoreductase activity, acting on CH-OH group of donors	9 out of 175 genes, 5.1%	86 out of 1768 genes, 4.9%	0.48374
DNA binding	5 out of 175 genes, 2.9%	47 out of 1768 genes, 2.7%	0.504306
carbon-carbon lyase activity	4 out of 175 genes, 2.3%	37 out of 1768 genes, 2.1%	0.506537
protein dimerization activity	2 out of 175 genes, 1.1%	17 out of 1768 genes, 1.0%	0.513429
magnesium ion binding	6 out of 175 genes, 3.4%	58 out of 1768 genes, 3.3%	0.520217
heterocyclic compound binding	73 out of 175 genes, 41.7%	736 out of 1768 genes, 41.6%	0.521141
GTP binding	5 out of 175 genes, 2.9%	48 out of 1768 genes, 2.7%	0.52375
guanyl nucleotide binding	5 out of 175 genes, 2.9%	48 out of 1768 genes, 2.7%	0.52375
guanyl ribonucleotide binding	5 out of 175 genes, 2.9%	48 out of 1768 genes, 2.7%	0.52375
organic cyclic compound binding	73 out of 175 genes, 41.7%	738 out of 1768 genes, 41.7%	0.533876
NADP binding	3 out of 175 genes, 1.7%	28 out of 1768 genes, 1.6%	0.53477
proton-transporting ATP synthase activity, rotational mechanism	2 out of 175 genes, 1.1%	18 out of 1768 genes, 1.0%	0.54503
substrate-specific transmembrane transporter activity	8 out of 175 genes, 4.6%	80 out of 1768 genes, 4.5%	0.54523
substrate-specific transporter activity	9 out of 175 genes, 5.1%	91 out of 1768 genes, 5.1%	0.55562
GTPase activity	3 out of 175 genes, 1.7%	29 out of 1768 genes, 1.6%	0.55937
coenzyme binding	11 out of 175 genes, 6.3%	112 out of 1768 genes, 6.3%	0.561143
hydrogen ion transmembrane transporter activity	4 out of 175 genes, 2.3%	40 out of 1768 genes, 2.3%	0.570492
ion binding	70 out of 175 genes, 40.0%	714 out of 1768 genes, 40.4%	0.573889
threonine-type endopeptidase activity	2 out of 175 genes, 1.1%	19 out of 1768 genes, 1.1%	0.575181
threonine-type peptidase activity	2 out of 175 genes, 1.1%	19 out of 1768 genes, 1.1%	0.575181
pyridoxal phosphate binding	3 out of 175 genes, 1.7%	31 out of 1768 genes, 1.8%	0.606164
monovalent inorganic cation transmembrane transporter activity	4 out of 175 genes, 2.3%	42 out of 1768 genes, 2.4%	0.610493
ion transmembrane transporter activity	6 out of 175 genes, 3.4%	65 out of 1768 genes, 3.7%	0.63624
transmembrane transporter activity	8 out of 175 genes, 4.6%	87 out of 1768 genes, 4.9%	0.644502
oxidoreductase activity, acting on NAD(P)H	4 out of 175 genes, 2.3%	44 out of 1768 genes, 2.5%	0.648151
ATPase activity, coupled to transmembrane movement of ions, rotational mechanism	2 out of 175 genes, 1.1%	22 out of 1768 genes, 1.2%	0.656792
NAD binding	3 out of 175 genes, 1.7%	34 out of 1768 genes, 1.9%	0.669976
inorganic cation transmembrane transporter activity	4 out of 175 genes, 2.3%	46 out of 1768 genes, 2.6%	0.683346
peroxidase activity	2 out of 175 genes, 1.1%	25 out of 1768 genes, 1.4%	0.725452
oxidoreductase activity, acting on peroxide as acceptor	2 out of 175 genes, 1.1%	25 out of 1768 genes, 1.4%	0.725452
ATP binding	23 out of 175 genes, 13.1%	256 out of 1768 genes, 14.5%	0.735521
adenyl nucleotide binding	23 out of 175 genes, 13.1%	257 out of 1768 genes, 14.5%	0.742667
adenyl ribonucleotide binding	23 out of 175 genes, 13.1%	257 out of 1768 genes, 14.5%	0.742667
transferase activity, transferring hexosyl groups	3 out of 175 genes, 1.7%	38 out of 1768 genes, 2.1%	0.742884
translation initiation factor activity	2 out of 175 genes, 1.1%	26 out of 1768 genes, 1.5%	0.745625
serine-type endopeptidase activity	2 out of 175 genes, 1.1%	26 out of 1768 genes, 1.5%	0.745625
purine ribonucleoside triphosphate binding	27 out of 175 genes, 15.4%	301 out of 1768 genes, 17.0%	0.754281
transferase activity, transferring acyl groups	3 out of 175 genes, 1.7%	39 out of 1768 genes, 2.2%	0.758986
hydrolase activity, acting on acid anhydrides	10 out of 175 genes, 5.7%	119 out of 1768 genes, 6.7%	0.760001
cation transmembrane transporter activity	4 out of 175 genes, 2.3%	51 out of 1768 genes, 2.9%	0.760324
nucleoside binding	27 out of 175 genes, 15.4%	302 out of 1768 genes, 17.1%	0.760723
purine nucleoside binding	27 out of 175 genes, 15.4%	302 out of 1768 genes, 17.1%	0.760723
purine nucleotide binding	27 out of 175 genes, 15.4%	302 out of 1768 genes, 17.1%	0.760723
ribonucleoside binding	27 out of 175 genes, 15.4%	302 out of 1768 genes, 17.1%	0.760723
purine ribonucleoside binding	27 out of 175 genes, 15.4%	302 out of 1768 genes, 17.1%	0.760723
purine ribonucleotide binding	27 out of 175 genes, 15.4%	302 out of 1768 genes, 17.1%	0.760723
transferase activity, transferring phosphorus-containing groups	9 out of 175 genes, 5.1%	109 out of 1768 genes, 6.2%	0.770649
endopeptidase activity	5 out of 175 genes, 2.9%	64 out of 1768 genes, 3.6%	0.776703
pyrophosphatase activity	9 out of 175 genes, 5.1%	110 out of 1768 genes, 6.2%	0.780074
iron ion binding	2 out of 175 genes, 1.1%	28 out of 1768 genes, 1.6%	0.782194
cation-transporting ATPase activity	2 out of 175 genes, 1.1%	28 out of 1768 genes, 1.6%	0.782194
transferase activity, transferring glycosyl groups	4 out of 175 genes, 2.3%	53 out of 1768 genes, 3.0%	0.786784
hydrolase activity, acting on acid anhydrides, in phosphorus-containing anhydrides	9 out of 175 genes, 5.1%	113 out of 1768 genes, 6.4%	0.806685
zinc ion binding	9 out of 175 genes, 5.1%	114 out of 1768 genes, 6.4%	0.815006
transferase activity	25 out of 175 genes, 14.3%	292 out of 1768 genes, 16.5%	0.827022
ribonucleotide binding	27 out of 175 genes, 15.4%	315 out of 1768 genes, 17.8%	0.83479
nucleoside-triphosphatase activity	8 out of 175 genes, 4.6%	105 out of 1768 genes, 5.9%	0.835128
ligase activity, forming carbon-nitrogen bonds	2 out of 175 genes, 1.1%	32 out of 1768 genes, 1.8%	0.841777
ATPase activity, coupled to transmembrane movement of ions	2 out of 175 genes, 1.1%	32 out of 1768 genes, 1.8%	0.841777
hydrolase activity, acting on glycosyl bonds	5 out of 175 genes, 2.9%	73 out of 1768 genes, 4.1%	0.865644
anion binding	33 out of 175 genes, 18.9%	388 out of 1768 genes, 21.9%	0.873086
ATPase activity, coupled to transmembrane movement of substances	2 out of 175 genes, 1.1%	35 out of 1768 genes, 2.0%	0.876367
ATPase activity, coupled to movement of substances	2 out of 175 genes, 1.1%	35 out of 1768 genes, 2.0%	0.876367
phosphotransferase activity, alcohol group as acceptor	4 out of 175 genes, 2.3%	63 out of 1768 genes, 3.6%	0.886055
protein kinase activity	2 out of 175 genes, 1.1%	36 out of 1768 genes, 2.0%	0.886262
hydrolase activity, acting on acid anhydrides, catalyzing transmembrane movement of substances	2 out of 175 genes, 1.1%	36 out of 1768 genes, 2.0%	0.886262
peptidase activity, acting on L-amino acid peptides	7 out of 175 genes, 4.0%	102 out of 1768 genes, 5.8%	0.89543
kinase activity	6 out of 175 genes, 3.4%	91 out of 1768 genes, 5.1%	0.903085
peptidase activity	8 out of 175 genes, 4.6%	119 out of 1768 genes, 6.7%	0.919321
hydrolase activity, hydrolyzing O-glycosyl compounds	4 out of 175 genes, 2.3%	69 out of 1768 genes, 3.9%	0.924008
ligase activity	5 out of 175 genes, 2.9%	83 out of 1768 genes, 4.7%	0.927722
lyase activity	6 out of 175 genes, 3.4%	96 out of 1768 genes, 5.4%	0.928073
primary active transmembrane transporter activity	2 out of 175 genes, 1.1%	42 out of 1768 genes, 2.4%	0.931801
P-P-bond-hydrolysis-driven transmembrane transporter activity	2 out of 175 genes, 1.1%	42 out of 1768 genes, 2.4%	0.931801
small molecule binding	45 out of 175 genes, 25.7%	536 out of 1768 genes, 30.3%	0.932473
ATPase activity, coupled	3 out of 175 genes, 1.7%	59 out of 1768 genes, 3.3%	0.94291
serine-type peptidase activity	2 out of 175 genes, 1.1%	45 out of 1768 genes, 2.5%	0.94752
serine hydrolase activity	2 out of 175 genes, 1.1%	45 out of 1768 genes, 2.5%	0.94752
nucleotide binding	42 out of 175 genes, 24.0%	524 out of 1768 genes, 29.6%	0.966567
nucleoside phosphate binding	42 out of 175 genes, 24.0%	524 out of 1768 genes, 29.6%	0.966567
ATPase activity	3 out of 175 genes, 1.7%	66 out of 1768 genes, 3.7%	0.967232
active transmembrane transporter activity	2 out of 175 genes, 1.1%	54 out of 1768 genes, 3.1%	0.976578
hydrolase activity, acting on ester bonds	2 out of 175 genes, 1.1%	86 out of 1768 genes, 4.9%	0.998889
hydrolase activity	25 out of 175 genes, 14.3%	421 out of 1768 genes, 23.8%	0.999621
catalytic activity	101 out of 175 genes, 57.7%	1227 out of 1768 genes, 69.4%	0.999796
