# Supplementary material for: Quantitative proteome-level analysis of paulownia witches’ broom disease with methyl methane sulfonate assistance reveals diverse metabolic changes during the infection and recovery processes
Source: PeerJ. 2017 Jul 3;5:e3495. doi: 10.7717/peerj.3495 (PMC5497676; doi:10.7717/peerj.3495)
Supplement: Table S8 [file peerj-05-3495-s013.xlsx]

## Sheet: sheet
TableS8 KEGG pathway analysis for the DAPs in PFI-20 vs. PFI-60.
	Pathway	Diff Proteins with pathway annotation (107)	All Proteins with pathway annotation (1727)	Pvalue	Pathway ID
1	Photosynthesis	17 (15.89%)	51 (2.95%)	2.1319e-09	ko00195
2	Ribosome	14 (13.08%)	126 (7.3%)	0.0201318	ko03010
3	Photosynthesis - antenna proteins	3 (2.8%)	14 (0.81%)	0.051035	ko00196
4	Lipoic acid metabolism	1 (0.93%)	1 (0.06%)	0.0619572	ko00785
5	Oxidative phosphorylation	7 (6.54%)	66 (3.82%)	0.109297	ko00190
6	Linoleic acid metabolism	1 (0.93%)	2 (0.12%)	0.120109	ko00591
7	RNA polymerase	1 (0.93%)	2 (0.12%)	0.120109	ko03020
8	Purine metabolism	4 (3.74%)	39 (2.26%)	0.219036	ko00230
9	Zeatin biosynthesis	1 (0.93%)	4 (0.23%)	0.225911	ko00908
10	Glycosphingolipid biosynthesis - ganglio series	1 (0.93%)	5 (0.29%)	0.273983	ko00604
11	Glycosaminoglycan degradation	1 (0.93%)	5 (0.29%)	0.273983	ko00531
12	Peroxisome	3 (2.8%)	32 (1.85%)	0.318161	ko04146
13	Sphingolipid metabolism	1 (0.93%)	6 (0.35%)	0.319095	ko00600
14	Pantothenate and CoA biosynthesis	1 (0.93%)	6 (0.35%)	0.319095	ko00770
15	Pyrimidine metabolism	2 (1.87%)	19 (1.1%)	0.331331	ko00240
16	Tyrosine metabolism	2 (1.87%)	21 (1.22%)	0.377468	ko00350
17	Endocytosis	2 (1.87%)	23 (1.33%)	0.422272	ko04144
18	Pyruvate metabolism	4 (3.74%)	56 (3.24%)	0.461533	ko00620
19	Isoquinoline alkaloid biosynthesis	1 (0.93%)	10 (0.58%)	0.473405	ko00950
20	RNA transport	4 (3.74%)	58 (3.36%)	0.489434	ko03013
21	Other glycan degradation	2 (1.87%)	27 (1.56%)	0.506599	ko00511
22	RNA degradation	2 (1.87%)	30 (1.74%)	0.564457	ko03018
23	Carbon fixation in photosynthetic organisms	4 (3.74%)	65 (3.76%)	0.581936	ko00710
24	Valine, leucine and isoleucine biosynthesis	1 (0.93%)	14 (0.81%)	0.592997	ko00290
25	Plant-pathogen interaction	3 (2.8%)	50 (2.9%)	0.609394	ko04626
26	Terpenoid backbone biosynthesis	1 (0.93%)	15 (0.87%)	0.61842	ko00900
27	Metabolic pathways	39 (36.45%)	650 (37.64%)	0.639974	ko01100
28	alpha-Linolenic acid metabolism	1 (0.93%)	16 (0.93%)	0.642268	ko00592
29	Glyoxylate and dicarboxylate metabolism	2 (1.87%)	37 (2.14%)	0.680108	ko00630
30	Proteasome	2 (1.87%)	37 (2.14%)	0.680108	ko03050
31	mRNA surveillance pathway	2 (1.87%)	37 (2.14%)	0.680108	ko03015
32	Fatty acid biosynthesis	1 (0.93%)	18 (1.04%)	0.685624	ko00061
33	Propanoate metabolism	1 (0.93%)	18 (1.04%)	0.685624	ko00640
34	Citrate cycle (TCA cycle)	2 (1.87%)	40 (2.32%)	0.721527	ko00020
35	Phenylalanine metabolism	1 (0.93%)	20 (1.16%)	0.723769	ko00360
36	Phenylpropanoid biosynthesis	2 (1.87%)	42 (2.43%)	0.746586	ko00940
37	Cysteine and methionine metabolism	1 (0.93%)	22 (1.27%)	0.757323	ko00270
38	Cyanoamino acid metabolism	1 (0.93%)	23 (1.33%)	0.772552	ko00460
39	Protein processing in endoplasmic reticulum	3 (2.8%)	65 (3.76%)	0.780686	ko04141
40	Arginine and proline metabolism	1 (0.93%)	24 (1.39%)	0.786835	ko00330
41	Galactose metabolism	1 (0.93%)	26 (1.51%)	0.812787	ko00052
42	Phagosome	1 (0.93%)	26 (1.51%)	0.812787	ko04145
43	Plant hormone signal transduction	1 (0.93%)	29 (1.68%)	0.845959	ko04075
44	Glutathione metabolism	1 (0.93%)	36 (2.08%)	0.902411	ko00480
45	Glycolysis / Gluconeogenesis	2 (1.87%)	73 (4.23%)	0.94886	ko00010
46	Starch and sucrose metabolism	1 (0.93%)	53 (3.07%)	0.968054	ko00500
47	Biosynthesis of secondary metabolites	12 (11.21%)	379 (21.95%)	0.998999	ko01110
