# Supplementary material for: Quantitative proteome-level analysis of paulownia witches’ broom disease with methyl methane sulfonate assistance reveals diverse metabolic changes during the infection and recovery processes
Source: PeerJ. 2017 Jul 3;5:e3495. doi: 10.7717/peerj.3495 (PMC5497676; doi:10.7717/peerj.3495)
Supplement: Table S10 [file peerj-05-3495-s014.xlsx]

## Sheet: biological process
Gene Ontology term	Cluster frequency	Protein frequency of use	P-value
photosynthesis	28 out of 116 genes, 24.1%	183 out of 1874 genes, 9.8%	2.19595e-06
organ formation	5 out of 116 genes, 4.3%	9 out of 1874 genes, 0.5%	8.6132e-05
electron transport chain	13 out of 116 genes, 11.2%	66 out of 1874 genes, 3.5%	0.000125114
photosynthetic electron transport in photosystem II	4 out of 116 genes, 3.4%	6 out of 1874 genes, 0.3%	0.000190078
post-embryonic organ development	12 out of 116 genes, 10.3%	60 out of 1874 genes, 3.2%	0.000199046
generation of precursor metabolites and energy	31 out of 116 genes, 26.7%	272 out of 1874 genes, 14.5%	0.000276952
peptidyl-proline modification	7 out of 116 genes, 6.0%	24 out of 1874 genes, 1.3%	0.000416875
floral organ morphogenesis	4 out of 116 genes, 3.4%	7 out of 1874 genes, 0.4%	0.000422335
floral organ formation	4 out of 116 genes, 3.4%	7 out of 1874 genes, 0.4%	0.000422335
post-embryonic organ morphogenesis	4 out of 116 genes, 3.4%	7 out of 1874 genes, 0.4%	0.000422335
post-embryonic morphogenesis	9 out of 116 genes, 7.8%	42 out of 1874 genes, 2.2%	0.000769759
photosynthesis, light reaction	18 out of 116 genes, 15.5%	131 out of 1874 genes, 7.0%	0.00077414
cellular metabolic process	96 out of 116 genes, 82.8%	1316 out of 1874 genes, 70.2%	0.00107238
floral organ development	10 out of 116 genes, 8.6%	53 out of 1874 genes, 2.8%	0.00113093
protein folding	14 out of 116 genes, 12.1%	92 out of 1874 genes, 4.9%	0.00113733
chlorophyll biosynthetic process	11 out of 116 genes, 9.5%	63 out of 1874 genes, 3.4%	0.00125563
protein peptidyl-prolyl isomerization	6 out of 116 genes, 5.2%	22 out of 1874 genes, 1.2%	0.00162713
ion transmembrane transport	7 out of 116 genes, 6.0%	32 out of 1874 genes, 1.7%	0.00267653
porphyrin-containing compound biosynthetic process	11 out of 116 genes, 9.5%	71 out of 1874 genes, 3.8%	0.00341552
anatomical structure formation involved in morphogenesis	5 out of 116 genes, 4.3%	18 out of 1874 genes, 1.0%	0.00372461
high-affinity iron ion transport	2 out of 116 genes, 1.7%	2 out of 1874 genes, 0.1%	0.00380057
iron ion transmembrane transport	2 out of 116 genes, 1.7%	2 out of 1874 genes, 0.1%	0.00380057
histone H3-K4 methylation	2 out of 116 genes, 1.7%	2 out of 1874 genes, 0.1%	0.00380057
tetrapyrrole biosynthetic process	11 out of 116 genes, 9.5%	72 out of 1874 genes, 3.8%	0.00382329
peptidyl-amino acid modification	7 out of 116 genes, 6.0%	34 out of 1874 genes, 1.8%	0.00385738
iron ion transport	3 out of 116 genes, 2.6%	6 out of 1874 genes, 0.3%	0.00402952
protein-chromophore linkage	3 out of 116 genes, 2.6%	6 out of 1874 genes, 0.3%	0.00402952
unsaturated fatty acid biosynthetic process	6 out of 116 genes, 5.2%	26 out of 1874 genes, 1.4%	0.00409283
unsaturated fatty acid metabolic process	6 out of 116 genes, 5.2%	26 out of 1874 genes, 1.4%	0.00409283
chlorophyll metabolic process	11 out of 116 genes, 9.5%	73 out of 1874 genes, 3.9%	0.00426924
protein metabolic process	48 out of 116 genes, 41.4%	568 out of 1874 genes, 30.3%	0.00587113
chromatin silencing	4 out of 116 genes, 3.4%	13 out of 1874 genes, 0.7%	0.00644458
negative regulation of gene expression, epigenetic	4 out of 116 genes, 3.4%	13 out of 1874 genes, 0.7%	0.00644458
defense response to bacterium	13 out of 116 genes, 11.2%	99 out of 1874 genes, 5.3%	0.00653295
cellular process	104 out of 116 genes, 89.7%	1519 out of 1874 genes, 81.1%	0.00726966
flower development	10 out of 116 genes, 8.6%	68 out of 1874 genes, 3.6%	0.00763462
isopentenyl diphosphate biosynthetic process	13 out of 116 genes, 11.2%	101 out of 1874 genes, 5.4%	0.00774832
isopentenyl diphosphate biosynthetic process, mevalonate-independent pathway	13 out of 116 genes, 11.2%	101 out of 1874 genes, 5.4%	0.00774832
glyceraldehyde-3-phosphate metabolic process	13 out of 116 genes, 11.2%	101 out of 1874 genes, 5.4%	0.00774832
isopentenyl diphosphate metabolic process	13 out of 116 genes, 11.2%	101 out of 1874 genes, 5.4%	0.00774832
photosynthesis, light harvesting	5 out of 116 genes, 4.3%	22 out of 1874 genes, 1.2%	0.00937711
energy coupled proton transport, down electrochemical gradient	5 out of 116 genes, 4.3%	22 out of 1874 genes, 1.2%	0.00937711
ATP synthesis coupled proton transport	5 out of 116 genes, 4.3%	22 out of 1874 genes, 1.2%	0.00937711
organ morphogenesis	8 out of 116 genes, 6.9%	50 out of 1874 genes, 2.7%	0.010128
purine nucleoside triphosphate biosynthetic process	6 out of 116 genes, 5.2%	31 out of 1874 genes, 1.7%	0.0101497
purine ribonucleoside triphosphate biosynthetic process	6 out of 116 genes, 5.2%	31 out of 1874 genes, 1.7%	0.0101497
phospholipid biosynthetic process	14 out of 116 genes, 12.1%	116 out of 1874 genes, 6.2%	0.0101706
porphyrin-containing compound metabolic process	11 out of 116 genes, 9.5%	82 out of 1874 genes, 4.4%	0.0104313
tetrapyrrole metabolic process	11 out of 116 genes, 9.5%	82 out of 1874 genes, 4.4%	0.0104313
cellular protein metabolic process	42 out of 116 genes, 36.2%	495 out of 1874 genes, 26.4%	0.0105886
pyruvate metabolic process	13 out of 116 genes, 11.2%	105 out of 1874 genes, 5.6%	0.0107149
cellular copper ion homeostasis	2 out of 116 genes, 1.7%	3 out of 1874 genes, 0.2%	0.0109388
specification of organ identity	2 out of 116 genes, 1.7%	3 out of 1874 genes, 0.2%	0.0109388
specification of floral organ identity	2 out of 116 genes, 1.7%	3 out of 1874 genes, 0.2%	0.0109388
histone phosphorylation	2 out of 116 genes, 1.7%	3 out of 1874 genes, 0.2%	0.0109388
one-carbon compound transport	2 out of 116 genes, 1.7%	3 out of 1874 genes, 0.2%	0.0109388
rRNA processing	12 out of 116 genes, 10.3%	94 out of 1874 genes, 5.0%	0.0111473
rRNA metabolic process	12 out of 116 genes, 10.3%	94 out of 1874 genes, 5.0%	0.0111473
ncRNA processing	12 out of 116 genes, 10.3%	94 out of 1874 genes, 5.0%	0.0111473
lipoate metabolic process	4 out of 116 genes, 3.4%	15 out of 1874 genes, 0.8%	0.0111714
ATP metabolic process	7 out of 116 genes, 6.0%	41 out of 1874 genes, 2.2%	0.011236
cofactor biosynthetic process	13 out of 116 genes, 11.2%	106 out of 1874 genes, 5.7%	0.0115801
nucleoside triphosphate biosynthetic process	6 out of 116 genes, 5.2%	32 out of 1874 genes, 1.7%	0.0118743
ribonucleoside triphosphate biosynthetic process	6 out of 116 genes, 5.2%	32 out of 1874 genes, 1.7%	0.0118743
response to bacterium	14 out of 116 genes, 12.1%	119 out of 1874 genes, 6.4%	0.0126614
transition metal ion transport	3 out of 116 genes, 2.6%	9 out of 1874 genes, 0.5%	0.0147503
superoxide metabolic process	3 out of 116 genes, 2.6%	9 out of 1874 genes, 0.5%	0.0147503
shoot system morphogenesis	9 out of 116 genes, 7.8%	64 out of 1874 genes, 3.4%	0.0149707
cellular aldehyde metabolic process	14 out of 116 genes, 12.1%	122 out of 1874 genes, 6.5%	0.015606
regionalization	4 out of 116 genes, 3.4%	17 out of 1874 genes, 0.9%	0.0176934
plasma membrane ATP synthesis coupled proton transport	4 out of 116 genes, 3.4%	17 out of 1874 genes, 0.9%	0.0176934
purine-containing compound biosynthetic process	8 out of 116 genes, 6.9%	55 out of 1874 genes, 2.9%	0.0177186
phospholipid metabolic process	14 out of 116 genes, 12.1%	124 out of 1874 genes, 6.6%	0.0178459
negative regulation of cellular metabolic process	6 out of 116 genes, 5.2%	35 out of 1874 genes, 1.9%	0.0182736
pigment biosynthetic process	12 out of 116 genes, 10.3%	101 out of 1874 genes, 5.4%	0.0191985
regulation of plant-type hypersensitive response	5 out of 116 genes, 4.3%	26 out of 1874 genes, 1.4%	0.0192082
chromatin organization	7 out of 116 genes, 6.0%	46 out of 1874 genes, 2.5%	0.0206961
DNA modification	2 out of 116 genes, 1.7%	4 out of 1874 genes, 0.2%	0.0209938
DNA alkylation	2 out of 116 genes, 1.7%	4 out of 1874 genes, 0.2%	0.0209938
DNA methylation	2 out of 116 genes, 1.7%	4 out of 1874 genes, 0.2%	0.0209938
positive regulation of flavonoid biosynthetic process	2 out of 116 genes, 1.7%	4 out of 1874 genes, 0.2%	0.0209938
nonphotochemical quenching	2 out of 116 genes, 1.7%	4 out of 1874 genes, 0.2%	0.0209938
DNA methylation or demethylation	2 out of 116 genes, 1.7%	4 out of 1874 genes, 0.2%	0.0209938
positive regulation of secondary metabolite biosynthetic process	2 out of 116 genes, 1.7%	4 out of 1874 genes, 0.2%	0.0209938
energy quenching	2 out of 116 genes, 1.7%	4 out of 1874 genes, 0.2%	0.0209938
regulation of cellular response to stress	5 out of 116 genes, 4.3%	27 out of 1874 genes, 1.4%	0.0224372
metabolic process	106 out of 116 genes, 91.4%	1590 out of 1874 genes, 84.8%	0.0237236
purine nucleoside triphosphate metabolic process	9 out of 116 genes, 7.8%	69 out of 1874 genes, 3.7%	0.0237273
purine ribonucleoside triphosphate metabolic process	9 out of 116 genes, 7.8%	69 out of 1874 genes, 3.7%	0.0237273
intracellular signal transduction	7 out of 116 genes, 6.0%	48 out of 1874 genes, 2.6%	0.0257005
ribonucleoside triphosphate metabolic process	9 out of 116 genes, 7.8%	70 out of 1874 genes, 3.7%	0.0258449
ATP biosynthetic process	5 out of 116 genes, 4.3%	28 out of 1874 genes, 1.5%	0.0259999
monocarboxylic acid biosynthetic process	11 out of 116 genes, 9.5%	94 out of 1874 genes, 5.0%	0.0272931
nucleoside triphosphate metabolic process	9 out of 116 genes, 7.8%	71 out of 1874 genes, 3.8%	0.0280939
organophosphate biosynthetic process	21 out of 116 genes, 18.1%	223 out of 1874 genes, 11.9%	0.0283806
floral whorl development	7 out of 116 genes, 6.0%	49 out of 1874 genes, 2.6%	0.0284904
transmembrane transport	10 out of 116 genes, 8.6%	83 out of 1874 genes, 4.4%	0.0290241
response to temperature stimulus	19 out of 116 genes, 16.4%	197 out of 1874 genes, 10.5%	0.0294807
regulation of cell death	5 out of 116 genes, 4.3%	29 out of 1874 genes, 1.5%	0.0299065
regulation of programmed cell death	5 out of 116 genes, 4.3%	29 out of 1874 genes, 1.5%	0.0299065
plant-type ovary development	6 out of 116 genes, 5.2%	39 out of 1874 genes, 2.1%	0.0300246
carpel development	6 out of 116 genes, 5.2%	39 out of 1874 genes, 2.1%	0.0300246
ovule development	6 out of 116 genes, 5.2%	39 out of 1874 genes, 2.1%	0.0300246
organ development	18 out of 116 genes, 15.5%	185 out of 1874 genes, 9.9%	0.0313441
purine nucleotide biosynthetic process	7 out of 116 genes, 6.0%	50 out of 1874 genes, 2.7%	0.0314796
fatty acid biosynthetic process	7 out of 116 genes, 6.0%	50 out of 1874 genes, 2.7%	0.0314796
coumarin metabolic process	2 out of 116 genes, 1.7%	5 out of 1874 genes, 0.3%	0.0335831
coumarin biosynthetic process	2 out of 116 genes, 1.7%	5 out of 1874 genes, 0.3%	0.0335831
regulation of flavonoid biosynthetic process	2 out of 116 genes, 1.7%	5 out of 1874 genes, 0.3%	0.0335831
regulation of ketone biosynthetic process	2 out of 116 genes, 1.7%	5 out of 1874 genes, 0.3%	0.0335831
copper ion homeostasis	2 out of 116 genes, 1.7%	5 out of 1874 genes, 0.3%	0.0335831
regulation of secondary metabolite biosynthetic process	2 out of 116 genes, 1.7%	5 out of 1874 genes, 0.3%	0.0335831
purine ribonucleotide biosynthetic process	6 out of 116 genes, 5.2%	40 out of 1874 genes, 2.1%	0.033592
purine nucleoside biosynthetic process	6 out of 116 genes, 5.2%	40 out of 1874 genes, 2.1%	0.033592
purine ribonucleoside biosynthetic process	6 out of 116 genes, 5.2%	40 out of 1874 genes, 2.1%	0.033592
chromatin modification	5 out of 116 genes, 4.3%	30 out of 1874 genes, 1.6%	0.0341655
covalent chromatin modification	5 out of 116 genes, 4.3%	30 out of 1874 genes, 1.6%	0.0341655
photosystem II assembly	8 out of 116 genes, 6.9%	62 out of 1874 genes, 3.3%	0.0342636
nucleoside metabolic process	10 out of 116 genes, 8.6%	86 out of 1874 genes, 4.6%	0.0361076
jasmonic acid metabolic process	4 out of 116 genes, 3.4%	21 out of 1874 genes, 1.1%	0.0367568
jasmonic acid biosynthetic process	4 out of 116 genes, 3.4%	21 out of 1874 genes, 1.1%	0.0367568
negative regulation of transcription, DNA-dependent	4 out of 116 genes, 3.4%	21 out of 1874 genes, 1.1%	0.0367568
negative regulation of RNA metabolic process	4 out of 116 genes, 3.4%	21 out of 1874 genes, 1.1%	0.0367568
cofactor metabolic process	19 out of 116 genes, 16.4%	202 out of 1874 genes, 10.8%	0.0371594
nucleoside biosynthetic process	6 out of 116 genes, 5.2%	41 out of 1874 genes, 2.2%	0.0374244
ribonucleoside biosynthetic process	6 out of 116 genes, 5.2%	41 out of 1874 genes, 2.2%	0.0374244
gynoecium development	6 out of 116 genes, 5.2%	41 out of 1874 genes, 2.2%	0.0374244
response to high light intensity	7 out of 116 genes, 6.0%	52 out of 1874 genes, 2.8%	0.0380767
purine-containing compound metabolic process	11 out of 116 genes, 9.5%	99 out of 1874 genes, 5.3%	0.0382944
regulation of immune system process	5 out of 116 genes, 4.3%	31 out of 1874 genes, 1.7%	0.0387839
hydrogen transport	5 out of 116 genes, 4.3%	31 out of 1874 genes, 1.7%	0.0387839
proton transport	5 out of 116 genes, 4.3%	31 out of 1874 genes, 1.7%	0.0387839
regulation of innate immune response	5 out of 116 genes, 4.3%	31 out of 1874 genes, 1.7%	0.0387839
regulation of immune response	5 out of 116 genes, 4.3%	31 out of 1874 genes, 1.7%	0.0387839
ribosome biogenesis	12 out of 116 genes, 10.3%	112 out of 1874 genes, 6.0%	0.0397499
pigment metabolic process	12 out of 116 genes, 10.3%	112 out of 1874 genes, 6.0%	0.0397499
chromosome organization	7 out of 116 genes, 6.0%	53 out of 1874 genes, 2.8%	0.0416937
regulation of metabolic process	21 out of 116 genes, 18.1%	232 out of 1874 genes, 12.4%	0.0418208
ribonucleoprotein complex biogenesis	12 out of 116 genes, 10.3%	113 out of 1874 genes, 6.0%	0.0421847
single-organism developmental process	24 out of 116 genes, 20.7%	274 out of 1874 genes, 14.6%	0.042301
macromolecule metabolic process	60 out of 116 genes, 51.7%	817 out of 1874 genes, 43.6%	0.0426265
glycine catabolic process	4 out of 116 genes, 3.4%	22 out of 1874 genes, 1.2%	0.0428412
serine family amino acid catabolic process	4 out of 116 genes, 3.4%	22 out of 1874 genes, 1.2%	0.0428412
salicylic acid metabolic process	4 out of 116 genes, 3.4%	22 out of 1874 genes, 1.2%	0.0428412
salicylic acid biosynthetic process	4 out of 116 genes, 3.4%	22 out of 1874 genes, 1.2%	0.0428412
system development	25 out of 116 genes, 21.6%	290 out of 1874 genes, 15.5%	0.0453999
isoprenoid metabolic process	14 out of 116 genes, 12.1%	141 out of 1874 genes, 7.5%	0.0479978
isoprenoid biosynthetic process	14 out of 116 genes, 12.1%	141 out of 1874 genes, 7.5%	0.0479978
regulation of secondary metabolic process	2 out of 116 genes, 1.7%	6 out of 1874 genes, 0.3%	0.0483599
lateral root development	2 out of 116 genes, 1.7%	6 out of 1874 genes, 0.3%	0.0483599
regulation of phenylpropanoid metabolic process	2 out of 116 genes, 1.7%	6 out of 1874 genes, 0.3%	0.0483599
protein targeting to membrane	5 out of 116 genes, 4.3%	33 out of 1874 genes, 1.8%	0.0491192
plastid organization	14 out of 116 genes, 12.1%	143 out of 1874 genes, 7.6%	0.0530779
purine nucleotide metabolic process	10 out of 116 genes, 8.6%	92 out of 1874 genes, 4.9%	0.0537357
purine ribonucleotide metabolic process	9 out of 116 genes, 7.8%	80 out of 1874 genes, 4.3%	0.0548104
purine nucleoside metabolic process	9 out of 116 genes, 7.8%	80 out of 1874 genes, 4.3%	0.0548104
purine ribonucleoside metabolic process	9 out of 116 genes, 7.8%	80 out of 1874 genes, 4.3%	0.0548104
regulation of defense response	5 out of 116 genes, 4.3%	34 out of 1874 genes, 1.8%	0.0548421
regulation of response to stress	5 out of 116 genes, 4.3%	34 out of 1874 genes, 1.8%	0.0548421
negative regulation of macromolecule biosynthetic process	4 out of 116 genes, 3.4%	24 out of 1874 genes, 1.3%	0.0566115
regulation of gene expression, epigenetic	4 out of 116 genes, 3.4%	24 out of 1874 genes, 1.3%	0.0566115
negative regulation of nucleobase-containing compound metabolic process	4 out of 116 genes, 3.4%	24 out of 1874 genes, 1.3%	0.0566115
negative regulation of nitrogen compound metabolic process	4 out of 116 genes, 3.4%	24 out of 1874 genes, 1.3%	0.0566115
negative regulation of cellular macromolecule biosynthetic process	4 out of 116 genes, 3.4%	24 out of 1874 genes, 1.3%	0.0566115
response to light intensity	7 out of 116 genes, 6.0%	57 out of 1874 genes, 3.0%	0.058369
ribonucleoside metabolic process	9 out of 116 genes, 7.8%	81 out of 1874 genes, 4.3%	0.0585501
organelle organization	27 out of 116 genes, 23.3%	326 out of 1874 genes, 17.4%	0.0585695
heterocycle biosynthetic process	22 out of 116 genes, 19.0%	255 out of 1874 genes, 13.6%	0.0593806
regulation of response to biotic stimulus	3 out of 116 genes, 2.6%	15 out of 1874 genes, 0.8%	0.0609235
detection of biotic stimulus	3 out of 116 genes, 2.6%	15 out of 1874 genes, 0.8%	0.0609235
photosynthetic electron transport chain	5 out of 116 genes, 4.3%	35 out of 1874 genes, 1.9%	0.0609369
lipid biosynthetic process	18 out of 116 genes, 15.5%	200 out of 1874 genes, 10.7%	0.0610654
post-embryonic development	19 out of 116 genes, 16.4%	214 out of 1874 genes, 11.4%	0.0615354
response to cold	12 out of 116 genes, 10.3%	120 out of 1874 genes, 6.4%	0.0622132
cellular macromolecule metabolic process	54 out of 116 genes, 46.6%	738 out of 1874 genes, 39.4%	0.0633581
gene silencing	4 out of 116 genes, 3.4%	25 out of 1874 genes, 1.3%	0.0642896
negative regulation of cellular biosynthetic process	4 out of 116 genes, 3.4%	25 out of 1874 genes, 1.3%	0.0642896
cell proliferation	2 out of 116 genes, 1.7%	7 out of 1874 genes, 0.4%	0.0650099
mitochondrial ATP synthesis coupled electron transport	2 out of 116 genes, 1.7%	7 out of 1874 genes, 0.4%	0.0650099
post-embryonic root development	2 out of 116 genes, 1.7%	7 out of 1874 genes, 0.4%	0.0650099
response to chitin	3 out of 116 genes, 2.6%	16 out of 1874 genes, 0.9%	0.0717068
respiratory electron transport chain	3 out of 116 genes, 2.6%	16 out of 1874 genes, 0.9%	0.0717068
negative regulation of metabolic process	6 out of 116 genes, 5.2%	48 out of 1874 genes, 2.6%	0.0720116
glycine metabolic process	4 out of 116 genes, 3.4%	26 out of 1874 genes, 1.4%	0.0724862
negative regulation of biosynthetic process	4 out of 116 genes, 3.4%	26 out of 1874 genes, 1.4%	0.0724862
benzene-containing compound metabolic process	4 out of 116 genes, 3.4%	26 out of 1874 genes, 1.4%	0.0724862
anatomical structure morphogenesis	14 out of 116 genes, 12.1%	150 out of 1874 genes, 8.0%	0.0737796
pattern specification process	4 out of 116 genes, 3.4%	27 out of 1874 genes, 1.4%	0.0811904
stomatal complex morphogenesis	4 out of 116 genes, 3.4%	27 out of 1874 genes, 1.4%	0.0811904
stomatal complex development	4 out of 116 genes, 3.4%	27 out of 1874 genes, 1.4%	0.0811904
polyamine catabolic process	2 out of 116 genes, 1.7%	8 out of 1874 genes, 0.4%	0.0832488
photoinhibition	2 out of 116 genes, 1.7%	8 out of 1874 genes, 0.4%	0.0832488
photosystem II repair	2 out of 116 genes, 1.7%	8 out of 1874 genes, 0.4%	0.0832488
protein repair	2 out of 116 genes, 1.7%	8 out of 1874 genes, 0.4%	0.0832488
negative regulation of photosynthesis, light reaction	2 out of 116 genes, 1.7%	8 out of 1874 genes, 0.4%	0.0832488
histone H3-K9 methylation	2 out of 116 genes, 1.7%	8 out of 1874 genes, 0.4%	0.0832488
negative regulation of biological process	9 out of 116 genes, 7.8%	87 out of 1874 genes, 4.6%	0.0844365
leaf morphogenesis	5 out of 116 genes, 4.3%	39 out of 1874 genes, 2.1%	0.0889984
regulation of transcription, DNA-dependent	10 out of 116 genes, 8.6%	101 out of 1874 genes, 5.4%	0.0896251
regulation of RNA biosynthetic process	10 out of 116 genes, 8.6%	101 out of 1874 genes, 5.4%	0.0896251
negative regulation of cellular process	6 out of 116 genes, 5.2%	51 out of 1874 genes, 2.7%	0.091075
organophosphate metabolic process	26 out of 116 genes, 22.4%	327 out of 1874 genes, 17.4%	0.094601
response to organic nitrogen	3 out of 116 genes, 2.6%	18 out of 1874 genes, 1.0%	0.0956005
regulation of hydrogen peroxide metabolic process	3 out of 116 genes, 2.6%	18 out of 1874 genes, 1.0%	0.0956005
regulation of reactive oxygen species metabolic process	3 out of 116 genes, 2.6%	18 out of 1874 genes, 1.0%	0.0956005
response to abiotic stimulus	35 out of 116 genes, 30.2%	462 out of 1874 genes, 24.7%	0.0963582
response to biotic stimulus	16 out of 116 genes, 13.8%	185 out of 1874 genes, 9.9%	0.100112
oxidative phosphorylation	2 out of 116 genes, 1.7%	9 out of 1874 genes, 0.5%	0.10282
ATP synthesis coupled electron transport	2 out of 116 genes, 1.7%	9 out of 1874 genes, 0.5%	0.10282
gene expression	26 out of 116 genes, 22.4%	330 out of 1874 genes, 17.6%	0.103056
regulation of cellular metabolic process	15 out of 116 genes, 12.9%	172 out of 1874 genes, 9.2%	0.103794
ncRNA metabolic process	12 out of 116 genes, 10.3%	131 out of 1874 genes, 7.0%	0.105011
shoot system development	9 out of 116 genes, 7.8%	91 out of 1874 genes, 4.9%	0.105023
positive regulation of catalytic activity	5 out of 116 genes, 4.3%	41 out of 1874 genes, 2.2%	0.105176
positive regulation of molecular function	5 out of 116 genes, 4.3%	41 out of 1874 genes, 2.2%	0.105176
defense response	14 out of 116 genes, 12.1%	159 out of 1874 genes, 8.5%	0.107429
ATP catabolic process	3 out of 116 genes, 2.6%	19 out of 1874 genes, 1.0%	0.108616
jasmonic acid mediated signaling pathway	3 out of 116 genes, 2.6%	19 out of 1874 genes, 1.0%	0.108616
gene silencing by RNA	3 out of 116 genes, 2.6%	19 out of 1874 genes, 1.0%	0.108616
negative regulation of defense response	3 out of 116 genes, 2.6%	19 out of 1874 genes, 1.0%	0.108616
regulation of multi-organism process	3 out of 116 genes, 2.6%	19 out of 1874 genes, 1.0%	0.108616
detection of stimulus	3 out of 116 genes, 2.6%	19 out of 1874 genes, 1.0%	0.108616
cellular response to jasmonic acid stimulus	3 out of 116 genes, 2.6%	19 out of 1874 genes, 1.0%	0.108616
regulation of catalytic activity	7 out of 116 genes, 6.0%	66 out of 1874 genes, 3.5%	0.109224
regulation of RNA metabolic process	10 out of 116 genes, 8.6%	105 out of 1874 genes, 5.6%	0.109375
response to jasmonic acid stimulus	4 out of 116 genes, 3.4%	30 out of 1874 genes, 1.6%	0.110204
organic cyclic compound biosynthetic process	24 out of 116 genes, 20.7%	303 out of 1874 genes, 16.2%	0.110408
translation	16 out of 116 genes, 13.8%	188 out of 1874 genes, 10.0%	0.111613
monovalent inorganic cation transport	5 out of 116 genes, 4.3%	42 out of 1874 genes, 2.2%	0.113777
regulation of primary metabolic process	14 out of 116 genes, 12.1%	161 out of 1874 genes, 8.6%	0.116009
nucleobase-containing compound biosynthetic process	13 out of 116 genes, 11.2%	148 out of 1874 genes, 7.9%	0.120121
regulation of photosynthesis, light reaction	2 out of 116 genes, 1.7%	10 out of 1874 genes, 0.5%	0.123491
regulation of generation of precursor metabolites and energy	2 out of 116 genes, 1.7%	10 out of 1874 genes, 0.5%	0.123491
anatomical structure development	26 out of 116 genes, 22.4%	337 out of 1874 genes, 18.0%	0.124691
cellular component biogenesis	22 out of 116 genes, 19.0%	278 out of 1874 genes, 14.8%	0.125005
cellular nitrogen compound biosynthetic process	21 out of 116 genes, 18.1%	264 out of 1874 genes, 14.1%	0.127326
macromolecular complex assembly	14 out of 116 genes, 12.1%	164 out of 1874 genes, 8.8%	0.129628
nucleobase-containing compound metabolic process	33 out of 116 genes, 28.4%	445 out of 1874 genes, 23.7%	0.132899
negative regulation of response to stimulus	3 out of 116 genes, 2.6%	21 out of 1874 genes, 1.1%	0.13653
RNA processing	12 out of 116 genes, 10.3%	138 out of 1874 genes, 7.4%	0.139696
negative regulation of gene expression	4 out of 116 genes, 3.4%	33 out of 1874 genes, 1.8%	0.14319
oxidoreduction coenzyme metabolic process	11 out of 116 genes, 9.5%	125 out of 1874 genes, 6.7%	0.144668
polyamine metabolic process	2 out of 116 genes, 1.7%	11 out of 1874 genes, 0.6%	0.145055
regulation of cellular ketone metabolic process	2 out of 116 genes, 1.7%	11 out of 1874 genes, 0.6%	0.145055
response to heat	7 out of 116 genes, 6.0%	71 out of 1874 genes, 3.8%	0.145267
cellular component organization or biogenesis	38 out of 116 genes, 32.8%	526 out of 1874 genes, 28.1%	0.146173
organic acid biosynthetic process	18 out of 116 genes, 15.5%	225 out of 1874 genes, 12.0%	0.146386
carboxylic acid biosynthetic process	18 out of 116 genes, 15.5%	225 out of 1874 genes, 12.0%	0.146386
regulation of nucleobase-containing compound metabolic process	10 out of 116 genes, 8.6%	112 out of 1874 genes, 6.0%	0.149486
sulfur compound metabolic process	12 out of 116 genes, 10.3%	140 out of 1874 genes, 7.5%	0.150646
aromatic compound biosynthetic process	21 out of 116 genes, 18.1%	270 out of 1874 genes, 14.4%	0.150739
MAPK cascade	3 out of 116 genes, 2.6%	22 out of 1874 genes, 1.2%	0.151323
intracellular protein kinase cascade	3 out of 116 genes, 2.6%	22 out of 1874 genes, 1.2%	0.151323
response to other organism	15 out of 116 genes, 12.9%	183 out of 1874 genes, 9.8%	0.152693
phosphate-containing compound metabolic process	31 out of 116 genes, 26.7%	421 out of 1874 genes, 22.5%	0.153928
regulation of macromolecule biosynthetic process	10 out of 116 genes, 8.6%	113 out of 1874 genes, 6.0%	0.155771
regulation of cellular macromolecule biosynthetic process	10 out of 116 genes, 8.6%	113 out of 1874 genes, 6.0%	0.155771
phosphorus metabolic process	32 out of 116 genes, 27.6%	437 out of 1874 genes, 23.3%	0.156495
nucleobase-containing small molecule metabolic process	20 out of 116 genes, 17.2%	257 out of 1874 genes, 13.7%	0.158126
carbohydrate derivative metabolic process	22 out of 116 genes, 19.0%	287 out of 1874 genes, 15.3%	0.159739
oxidation-reduction process	35 out of 116 genes, 30.2%	484 out of 1874 genes, 25.8%	0.159866
regulation of molecular function	7 out of 116 genes, 6.0%	73 out of 1874 genes, 3.9%	0.161119
regulation of nitrogen compound metabolic process	10 out of 116 genes, 8.6%	114 out of 1874 genes, 6.1%	0.162188
organonitrogen compound catabolic process	10 out of 116 genes, 8.6%	114 out of 1874 genes, 6.1%	0.162188
single-multicellular organism process	28 out of 116 genes, 24.1%	378 out of 1874 genes, 20.2%	0.163212
monocarboxylic acid metabolic process	18 out of 116 genes, 15.5%	229 out of 1874 genes, 12.2%	0.164463
cation transport	8 out of 116 genes, 6.9%	87 out of 1874 genes, 4.6%	0.165459
serine family amino acid metabolic process	8 out of 116 genes, 6.9%	87 out of 1874 genes, 4.6%	0.165459
regulation of macromolecule metabolic process	13 out of 116 genes, 11.2%	157 out of 1874 genes, 8.4%	0.166576
steroid biosynthetic process	3 out of 116 genes, 2.6%	23 out of 1874 genes, 1.2%	0.166602
multicellular organismal process	28 out of 116 genes, 24.1%	379 out of 1874 genes, 20.2%	0.166978
DNA-dependent DNA replication	2 out of 116 genes, 1.7%	12 out of 1874 genes, 0.6%	0.167323
nucleosome assembly	2 out of 116 genes, 1.7%	12 out of 1874 genes, 0.6%	0.167323
chromatin assembly	2 out of 116 genes, 1.7%	12 out of 1874 genes, 0.6%	0.167323
nucleosome organization	2 out of 116 genes, 1.7%	12 out of 1874 genes, 0.6%	0.167323
protein-DNA complex assembly	2 out of 116 genes, 1.7%	12 out of 1874 genes, 0.6%	0.167323
protein-DNA complex subunit organization	2 out of 116 genes, 1.7%	12 out of 1874 genes, 0.6%	0.167323
nucleotide biosynthetic process	9 out of 116 genes, 7.8%	101 out of 1874 genes, 5.4%	0.167792
nucleoside phosphate biosynthetic process	9 out of 116 genes, 7.8%	101 out of 1874 genes, 5.4%	0.167792
glycosyl compound metabolic process	11 out of 116 genes, 9.5%	129 out of 1874 genes, 6.9%	0.168686
multicellular organismal development	27 out of 116 genes, 23.3%	365 out of 1874 genes, 19.5%	0.171454
ribonucleotide metabolic process	9 out of 116 genes, 7.8%	102 out of 1874 genes, 5.4%	0.1749
ribose phosphate metabolic process	9 out of 116 genes, 7.8%	102 out of 1874 genes, 5.4%	0.1749
cellular component organization	34 out of 116 genes, 29.3%	473 out of 1874 genes, 25.2%	0.175169
nucleoside phosphate metabolic process	19 out of 116 genes, 16.4%	247 out of 1874 genes, 13.2%	0.179838
nucleotide metabolic process	19 out of 116 genes, 16.4%	247 out of 1874 genes, 13.2%	0.179838
response to oxygen-containing compound	19 out of 116 genes, 16.4%	247 out of 1874 genes, 13.2%	0.179838
multi-organism process	16 out of 116 genes, 13.8%	203 out of 1874 genes, 10.8%	0.180722
steroid metabolic process	3 out of 116 genes, 2.6%	24 out of 1874 genes, 1.3%	0.182315
systemic acquired resistance, salicylic acid mediated signaling pathway	3 out of 116 genes, 2.6%	24 out of 1874 genes, 1.3%	0.182315
salicylic acid mediated signaling pathway	3 out of 116 genes, 2.6%	24 out of 1874 genes, 1.3%	0.182315
cellular response to salicylic acid stimulus	3 out of 116 genes, 2.6%	24 out of 1874 genes, 1.3%	0.182315
hormone-mediated signaling pathway	5 out of 116 genes, 4.3%	49 out of 1874 genes, 2.6%	0.182573
regulation of response to stimulus	5 out of 116 genes, 4.3%	49 out of 1874 genes, 2.6%	0.182573
coenzyme metabolic process	13 out of 116 genes, 11.2%	161 out of 1874 genes, 8.6%	0.189853
cellular macromolecular complex assembly	13 out of 116 genes, 11.2%	161 out of 1874 genes, 8.6%	0.189853
DNA packaging	2 out of 116 genes, 1.7%	13 out of 1874 genes, 0.7%	0.190129
regulation of photosynthesis	2 out of 116 genes, 1.7%	13 out of 1874 genes, 0.7%	0.190129
tetraterpenoid metabolic process	5 out of 116 genes, 4.3%	50 out of 1874 genes, 2.7%	0.193476
tetraterpenoid biosynthetic process	5 out of 116 genes, 4.3%	50 out of 1874 genes, 2.7%	0.193476
carotenoid metabolic process	5 out of 116 genes, 4.3%	50 out of 1874 genes, 2.7%	0.193476
carotenoid biosynthetic process	5 out of 116 genes, 4.3%	50 out of 1874 genes, 2.7%	0.193476
reproductive structure development	13 out of 116 genes, 11.2%	162 out of 1874 genes, 8.6%	0.195908
reproductive system development	13 out of 116 genes, 11.2%	162 out of 1874 genes, 8.6%	0.195908
regulation of cellular biosynthetic process	10 out of 116 genes, 8.6%	119 out of 1874 genes, 6.4%	0.19618
histone modification	3 out of 116 genes, 2.6%	25 out of 1874 genes, 1.3%	0.198409
protein complex assembly	12 out of 116 genes, 10.3%	148 out of 1874 genes, 7.9%	0.198783
protein complex biogenesis	12 out of 116 genes, 10.3%	148 out of 1874 genes, 7.9%	0.198783
cellular protein modification process	13 out of 116 genes, 11.2%	163 out of 1874 genes, 8.7%	0.202054
protein modification process	13 out of 116 genes, 11.2%	163 out of 1874 genes, 8.7%	0.202054
negative regulation of macromolecule metabolic process	4 out of 116 genes, 3.4%	38 out of 1874 genes, 2.0%	0.20538
response to stress	39 out of 116 genes, 33.6%	560 out of 1874 genes, 29.9%	0.209639
ribonucleotide biosynthetic process	6 out of 116 genes, 5.2%	65 out of 1874 genes, 3.5%	0.210547
ribose phosphate biosynthetic process	6 out of 116 genes, 5.2%	65 out of 1874 genes, 3.5%	0.210547
developmental process involved in reproduction	14 out of 116 genes, 12.1%	179 out of 1874 genes, 9.6%	0.210583
response to light stimulus	14 out of 116 genes, 12.1%	179 out of 1874 genes, 9.6%	0.210583
regulation of biosynthetic process	10 out of 116 genes, 8.6%	121 out of 1874 genes, 6.5%	0.21061
cellular component assembly	15 out of 116 genes, 12.9%	194 out of 1874 genes, 10.4%	0.212274
DNA replication	2 out of 116 genes, 1.7%	14 out of 1874 genes, 0.7%	0.213322
phytosteroid biosynthetic process	2 out of 116 genes, 1.7%	14 out of 1874 genes, 0.7%	0.213322
brassinosteroid biosynthetic process	2 out of 116 genes, 1.7%	14 out of 1874 genes, 0.7%	0.213322
response to wounding	3 out of 116 genes, 2.6%	26 out of 1874 genes, 1.4%	0.214834
fatty acid metabolic process	8 out of 116 genes, 6.9%	94 out of 1874 genes, 5.0%	0.221887
macromolecular complex subunit organization	14 out of 116 genes, 12.1%	181 out of 1874 genes, 9.7%	0.222861
regulation of gene expression	10 out of 116 genes, 8.6%	123 out of 1874 genes, 6.6%	0.225477
cellular response to hormone stimulus	5 out of 116 genes, 4.3%	53 out of 1874 genes, 2.8%	0.227489
cellular response to endogenous stimulus	5 out of 116 genes, 4.3%	53 out of 1874 genes, 2.8%	0.227489
vitamin metabolic process	3 out of 116 genes, 2.6%	27 out of 1874 genes, 1.4%	0.23154
response to water deprivation	4 out of 116 genes, 3.4%	40 out of 1874 genes, 2.1%	0.23221
regulation of protein dephosphorylation	4 out of 116 genes, 3.4%	40 out of 1874 genes, 2.1%	0.23221
developmental process	28 out of 116 genes, 24.1%	395 out of 1874 genes, 21.1%	0.233812
response to radiation	14 out of 116 genes, 12.1%	183 out of 1874 genes, 9.8%	0.235449
calcium ion transport	2 out of 116 genes, 1.7%	15 out of 1874 genes, 0.8%	0.236768
energy coupled proton transmembrane transport, against electrochemical gradient	2 out of 116 genes, 1.7%	15 out of 1874 genes, 0.8%	0.236768
ATP hydrolysis coupled proton transport	2 out of 116 genes, 1.7%	15 out of 1874 genes, 0.8%	0.236768
phytosteroid metabolic process	2 out of 116 genes, 1.7%	15 out of 1874 genes, 0.8%	0.236768
brassinosteroid metabolic process	2 out of 116 genes, 1.7%	15 out of 1874 genes, 0.8%	0.236768
single-organism metabolic process	62 out of 116 genes, 53.4%	935 out of 1874 genes, 49.9%	0.243663
response to water stimulus	4 out of 116 genes, 3.4%	41 out of 1874 genes, 2.2%	0.245944
response to fungus	4 out of 116 genes, 3.4%	41 out of 1874 genes, 2.2%	0.245944
response to salicylic acid stimulus	3 out of 116 genes, 2.6%	28 out of 1874 genes, 1.5%	0.248478
defense response to fungus	3 out of 116 genes, 2.6%	28 out of 1874 genes, 1.5%	0.248478
glycosyl compound biosynthetic process	7 out of 116 genes, 6.0%	83 out of 1874 genes, 4.4%	0.250694
macromolecule modification	15 out of 116 genes, 12.9%	201 out of 1874 genes, 10.7%	0.255055
regulation of biological process	31 out of 116 genes, 26.7%	447 out of 1874 genes, 23.9%	0.258887
regulation of dephosphorylation	4 out of 116 genes, 3.4%	42 out of 1874 genes, 2.2%	0.259856
reactive oxygen species metabolic process	4 out of 116 genes, 3.4%	42 out of 1874 genes, 2.2%	0.259856
chromatin assembly or disassembly	2 out of 116 genes, 1.7%	16 out of 1874 genes, 0.9%	0.260348
DNA conformation change	2 out of 116 genes, 1.7%	16 out of 1874 genes, 0.9%	0.260348
cellular response to abiotic stimulus	2 out of 116 genes, 1.7%	16 out of 1874 genes, 0.9%	0.260348
cellular macromolecule biosynthetic process	25 out of 116 genes, 21.6%	355 out of 1874 genes, 18.9%	0.263886
primary metabolic process	81 out of 116 genes, 69.8%	1250 out of 1874 genes, 66.7%	0.264506
photosynthetic electron transport in photosystem I	3 out of 116 genes, 2.6%	29 out of 1874 genes, 1.5%	0.265602
cell communication	11 out of 116 genes, 9.5%	143 out of 1874 genes, 7.6%	0.26631
cellular lipid metabolic process	17 out of 116 genes, 14.7%	233 out of 1874 genes, 12.4%	0.266423
reproductive process	14 out of 116 genes, 12.1%	188 out of 1874 genes, 10.0%	0.268157
macromolecule biosynthetic process	26 out of 116 genes, 22.4%	372 out of 1874 genes, 19.9%	0.271624
leaf development	5 out of 116 genes, 4.3%	57 out of 1874 genes, 3.0%	0.275301
small molecule biosynthetic process	19 out of 116 genes, 16.4%	265 out of 1874 genes, 14.1%	0.275638
nucleic acid metabolic process	19 out of 116 genes, 16.4%	265 out of 1874 genes, 14.1%	0.275638
sulfur amino acid metabolic process	7 out of 116 genes, 6.0%	86 out of 1874 genes, 4.6%	0.280221
lipid metabolic process	19 out of 116 genes, 16.4%	266 out of 1874 genes, 14.2%	0.281481
cellular protein complex assembly	11 out of 116 genes, 9.5%	145 out of 1874 genes, 7.7%	0.281672
cell division	3 out of 116 genes, 2.6%	30 out of 1874 genes, 1.6%	0.282869
cellulose biosynthetic process	2 out of 116 genes, 1.7%	17 out of 1874 genes, 0.9%	0.283957
negative regulation of catalytic activity	2 out of 116 genes, 1.7%	17 out of 1874 genes, 0.9%	0.283957
purine nucleoside catabolic process	4 out of 116 genes, 3.4%	44 out of 1874 genes, 2.3%	0.288119
purine nucleotide catabolic process	4 out of 116 genes, 3.4%	44 out of 1874 genes, 2.3%	0.288119
Golgi organization	4 out of 116 genes, 3.4%	44 out of 1874 genes, 2.3%	0.288119
nucleoside triphosphate catabolic process	4 out of 116 genes, 3.4%	44 out of 1874 genes, 2.3%	0.288119
purine nucleoside triphosphate catabolic process	4 out of 116 genes, 3.4%	44 out of 1874 genes, 2.3%	0.288119
purine ribonucleotide catabolic process	4 out of 116 genes, 3.4%	44 out of 1874 genes, 2.3%	0.288119
nucleoside catabolic process	4 out of 116 genes, 3.4%	44 out of 1874 genes, 2.3%	0.288119
nucleotide catabolic process	4 out of 116 genes, 3.4%	44 out of 1874 genes, 2.3%	0.288119
ribonucleoside triphosphate catabolic process	4 out of 116 genes, 3.4%	44 out of 1874 genes, 2.3%	0.288119
purine ribonucleoside triphosphate catabolic process	4 out of 116 genes, 3.4%	44 out of 1874 genes, 2.3%	0.288119
ribonucleotide catabolic process	4 out of 116 genes, 3.4%	44 out of 1874 genes, 2.3%	0.288119
regulation of protein modification process	4 out of 116 genes, 3.4%	44 out of 1874 genes, 2.3%	0.288119
ribonucleoside catabolic process	4 out of 116 genes, 3.4%	44 out of 1874 genes, 2.3%	0.288119
purine ribonucleoside catabolic process	4 out of 116 genes, 3.4%	44 out of 1874 genes, 2.3%	0.288119
purine-containing compound catabolic process	4 out of 116 genes, 3.4%	44 out of 1874 genes, 2.3%	0.288119
nucleoside phosphate catabolic process	4 out of 116 genes, 3.4%	44 out of 1874 genes, 2.3%	0.288119
signal transduction	9 out of 116 genes, 7.8%	117 out of 1874 genes, 6.2%	0.295901
biological regulation	34 out of 116 genes, 29.3%	502 out of 1874 genes, 26.8%	0.296109
heterocycle metabolic process	35 out of 116 genes, 30.2%	518 out of 1874 genes, 27.6%	0.297327
positive regulation of biosynthetic process	5 out of 116 genes, 4.3%	59 out of 1874 genes, 3.1%	0.299983
positive regulation of cellular biosynthetic process	5 out of 116 genes, 4.3%	59 out of 1874 genes, 3.1%	0.299983
phyllome development	5 out of 116 genes, 4.3%	59 out of 1874 genes, 3.1%	0.299983
regulation of flower development	3 out of 116 genes, 2.6%	31 out of 1874 genes, 1.7%	0.300235
organophosphate catabolic process	4 out of 116 genes, 3.4%	45 out of 1874 genes, 2.4%	0.302422
glycosyl compound catabolic process	4 out of 116 genes, 3.4%	45 out of 1874 genes, 2.4%	0.302422
pentose-phosphate shunt	8 out of 116 genes, 6.9%	103 out of 1874 genes, 5.5%	0.303212
acetyl-CoA metabolic process	2 out of 116 genes, 1.7%	18 out of 1874 genes, 1.0%	0.307501
histone lysine methylation	2 out of 116 genes, 1.7%	18 out of 1874 genes, 1.0%	0.307501
negative regulation of molecular function	2 out of 116 genes, 1.7%	18 out of 1874 genes, 1.0%	0.307501
NADPH regeneration	8 out of 116 genes, 6.9%	104 out of 1874 genes, 5.5%	0.312686
ion transport	8 out of 116 genes, 6.9%	104 out of 1874 genes, 5.5%	0.312686
reproduction	14 out of 116 genes, 12.1%	195 out of 1874 genes, 10.4%	0.316482
coenzyme biosynthetic process	4 out of 116 genes, 3.4%	46 out of 1874 genes, 2.5%	0.316808
organic substance metabolic process	85 out of 116 genes, 73.3%	1328 out of 1874 genes, 70.9%	0.317589
response to reactive oxygen species	6 out of 116 genes, 5.2%	75 out of 1874 genes, 4.0%	0.317945
protein complex subunit organization	12 out of 116 genes, 10.3%	165 out of 1874 genes, 8.8%	0.319901
secondary metabolic process	9 out of 116 genes, 7.8%	120 out of 1874 genes, 6.4%	0.322536
defense response, incompatible interaction	5 out of 116 genes, 4.3%	61 out of 1874 genes, 3.3%	0.325018
cellular metabolic compound salvage	5 out of 116 genes, 4.3%	61 out of 1874 genes, 3.3%	0.325018
regulation of protein metabolic process	5 out of 116 genes, 4.3%	61 out of 1874 genes, 3.3%	0.325018
phenylpropanoid biosynthetic process	2 out of 116 genes, 1.7%	19 out of 1874 genes, 1.0%	0.3309
sterol metabolic process	2 out of 116 genes, 1.7%	19 out of 1874 genes, 1.0%	0.3309
sterol biosynthetic process	2 out of 116 genes, 1.7%	19 out of 1874 genes, 1.0%	0.3309
carbohydrate derivative catabolic process	4 out of 116 genes, 3.4%	47 out of 1874 genes, 2.5%	0.331255
NADP metabolic process	8 out of 116 genes, 6.9%	106 out of 1874 genes, 5.7%	0.331818
regulation of reproductive process	3 out of 116 genes, 2.6%	33 out of 1874 genes, 1.8%	0.335107
positive regulation of metabolic process	5 out of 116 genes, 4.3%	62 out of 1874 genes, 3.3%	0.337631
terpenoid biosynthetic process	5 out of 116 genes, 4.3%	62 out of 1874 genes, 3.3%	0.337631
positive regulation of cellular metabolic process	5 out of 116 genes, 4.3%	62 out of 1874 genes, 3.3%	0.337631
immune response	6 out of 116 genes, 5.2%	77 out of 1874 genes, 4.1%	0.340568
pyridine nucleotide metabolic process	8 out of 116 genes, 6.9%	107 out of 1874 genes, 5.7%	0.341463
nicotinamide nucleotide metabolic process	8 out of 116 genes, 6.9%	107 out of 1874 genes, 5.7%	0.341463
alpha-amino acid catabolic process	4 out of 116 genes, 3.4%	48 out of 1874 genes, 2.6%	0.345741
response to inorganic substance	24 out of 116 genes, 20.7%	355 out of 1874 genes, 18.9%	0.34749
signaling	9 out of 116 genes, 7.8%	123 out of 1874 genes, 6.6%	0.34966
sulfur compound biosynthetic process	9 out of 116 genes, 7.8%	123 out of 1874 genes, 6.6%	0.34966
single organism signaling	9 out of 116 genes, 7.8%	123 out of 1874 genes, 6.6%	0.34966
cysteine metabolic process	5 out of 116 genes, 4.3%	63 out of 1874 genes, 3.4%	0.350288
terpenoid metabolic process	5 out of 116 genes, 4.3%	63 out of 1874 genes, 3.4%	0.350288
cysteine biosynthetic process	5 out of 116 genes, 4.3%	63 out of 1874 genes, 3.4%	0.350288
response to cadmium ion	18 out of 116 genes, 15.5%	262 out of 1874 genes, 14.0%	0.352098
organonitrogen compound biosynthetic process	21 out of 116 genes, 18.1%	309 out of 1874 genes, 16.5%	0.353244
microtubule cytoskeleton organization	2 out of 116 genes, 1.7%	20 out of 1874 genes, 1.1%	0.35408
aging	2 out of 116 genes, 1.7%	20 out of 1874 genes, 1.1%	0.35408
beta-glucan biosynthetic process	2 out of 116 genes, 1.7%	20 out of 1874 genes, 1.1%	0.35408
response to metal ion	19 out of 116 genes, 16.4%	278 out of 1874 genes, 14.8%	0.354746
protein localization	10 out of 116 genes, 8.6%	141 out of 1874 genes, 7.5%	0.373715
protein transport	10 out of 116 genes, 8.6%	141 out of 1874 genes, 7.5%	0.373715
establishment of protein localization	10 out of 116 genes, 8.6%	141 out of 1874 genes, 7.5%	0.373715
cellular amino acid catabolic process	4 out of 116 genes, 3.4%	50 out of 1874 genes, 2.7%	0.374746
regulation of phosphate metabolic process	4 out of 116 genes, 3.4%	50 out of 1874 genes, 2.7%	0.374746
regulation of phosphorus metabolic process	4 out of 116 genes, 3.4%	50 out of 1874 genes, 2.7%	0.374746
protein methylation	2 out of 116 genes, 1.7%	21 out of 1874 genes, 1.1%	0.37698
acyl-CoA metabolic process	2 out of 116 genes, 1.7%	21 out of 1874 genes, 1.1%	0.37698
protein alkylation	2 out of 116 genes, 1.7%	21 out of 1874 genes, 1.1%	0.37698
histone methylation	2 out of 116 genes, 1.7%	21 out of 1874 genes, 1.1%	0.37698
thioester metabolic process	2 out of 116 genes, 1.7%	21 out of 1874 genes, 1.1%	0.37698
intracellular protein transport	9 out of 116 genes, 7.8%	126 out of 1874 genes, 6.7%	0.377127
cellular protein localization	9 out of 116 genes, 7.8%	126 out of 1874 genes, 6.7%	0.377127
RNA metabolic process	15 out of 116 genes, 12.9%	219 out of 1874 genes, 11.7%	0.377423
pyridine-containing compound metabolic process	8 out of 116 genes, 6.9%	111 out of 1874 genes, 5.9%	0.380425
cellular modified amino acid metabolic process	3 out of 116 genes, 2.6%	36 out of 1874 genes, 1.9%	0.38723
alcohol biosynthetic process	3 out of 116 genes, 2.6%	36 out of 1874 genes, 1.9%	0.38723
organic hydroxy compound biosynthetic process	3 out of 116 genes, 2.6%	36 out of 1874 genes, 1.9%	0.38723
cellular nitrogen compound metabolic process	35 out of 116 genes, 30.2%	537 out of 1874 genes, 28.7%	0.390029
protein targeting	8 out of 116 genes, 6.9%	113 out of 1874 genes, 6.0%	0.400044
regulation of post-embryonic development	3 out of 116 genes, 2.6%	37 out of 1874 genes, 2.0%	0.404427
catabolic process	29 out of 116 genes, 25.0%	445 out of 1874 genes, 23.7%	0.40849
immune system process	6 out of 116 genes, 5.2%	83 out of 1874 genes, 4.4%	0.409194
glucan biosynthetic process	6 out of 116 genes, 5.2%	83 out of 1874 genes, 4.4%	0.409194
glucose catabolic process	13 out of 116 genes, 11.2%	193 out of 1874 genes, 10.3%	0.416833
hexose catabolic process	13 out of 116 genes, 11.2%	193 out of 1874 genes, 10.3%	0.416833
monosaccharide catabolic process	13 out of 116 genes, 11.2%	193 out of 1874 genes, 10.3%	0.416833
nucleobase-containing compound catabolic process	4 out of 116 genes, 3.4%	53 out of 1874 genes, 2.8%	0.418048
response to sucrose stimulus	3 out of 116 genes, 2.6%	38 out of 1874 genes, 2.0%	0.421488
response to disaccharide stimulus	3 out of 116 genes, 2.6%	38 out of 1874 genes, 2.0%	0.421488
response to extracellular stimulus	2 out of 116 genes, 1.7%	23 out of 1874 genes, 1.2%	0.421731
regulation of proton transport	2 out of 116 genes, 1.7%	23 out of 1874 genes, 1.2%	0.421731
cellular response to extracellular stimulus	2 out of 116 genes, 1.7%	23 out of 1874 genes, 1.2%	0.421731
cellular biogenic amine catabolic process	2 out of 116 genes, 1.7%	23 out of 1874 genes, 1.2%	0.421731
cellular response to external stimulus	2 out of 116 genes, 1.7%	23 out of 1874 genes, 1.2%	0.421731
organic substance catabolic process	27 out of 116 genes, 23.3%	417 out of 1874 genes, 22.3%	0.42988
DNA metabolic process	4 out of 116 genes, 3.4%	54 out of 1874 genes, 2.9%	0.432355
photorespiration	4 out of 116 genes, 3.4%	55 out of 1874 genes, 2.9%	0.446571
organic substance transport	12 out of 116 genes, 10.3%	181 out of 1874 genes, 9.7%	0.44662
carbohydrate catabolic process	14 out of 116 genes, 12.1%	213 out of 1874 genes, 11.4%	0.448613
cellular macromolecule localization	9 out of 116 genes, 7.8%	134 out of 1874 genes, 7.2%	0.450983
single-organism biosynthetic process	19 out of 116 genes, 16.4%	293 out of 1874 genes, 15.6%	0.45136
serine family amino acid biosynthetic process	5 out of 116 genes, 4.3%	71 out of 1874 genes, 3.8%	0.451499
response to nitrogen compound	3 out of 116 genes, 2.6%	40 out of 1874 genes, 2.1%	0.455105
small molecule metabolic process	41 out of 116 genes, 35.3%	646 out of 1874 genes, 34.5%	0.455235
single-organism carbohydrate catabolic process	13 out of 116 genes, 11.2%	198 out of 1874 genes, 10.6%	0.455421
starch metabolic process	5 out of 116 genes, 4.3%	72 out of 1874 genes, 3.8%	0.463959
cellular ion homeostasis	2 out of 116 genes, 1.7%	25 out of 1874 genes, 1.3%	0.464808
amine catabolic process	2 out of 116 genes, 1.7%	25 out of 1874 genes, 1.3%	0.464808
cellular cation homeostasis	2 out of 116 genes, 1.7%	25 out of 1874 genes, 1.3%	0.464808
cellular aromatic compound metabolic process	34 out of 116 genes, 29.3%	537 out of 1874 genes, 28.7%	0.472777
regulation of cellular protein metabolic process	4 out of 116 genes, 3.4%	57 out of 1874 genes, 3.0%	0.474673
response to hydrogen peroxide	4 out of 116 genes, 3.4%	57 out of 1874 genes, 3.0%	0.474673
carboxylic acid metabolic process	27 out of 116 genes, 23.3%	425 out of 1874 genes, 22.7%	0.475126
organic cyclic compound metabolic process	36 out of 116 genes, 31.0%	570 out of 1874 genes, 30.4%	0.477205
organonitrogen compound metabolic process	30 out of 116 genes, 25.9%	474 out of 1874 genes, 25.3%	0.47961
organic acid metabolic process	27 out of 116 genes, 23.3%	426 out of 1874 genes, 22.7%	0.480787
oxoacid metabolic process	27 out of 116 genes, 23.3%	426 out of 1874 genes, 22.7%	0.480787
cellular chemical homeostasis	2 out of 116 genes, 1.7%	26 out of 1874 genes, 1.4%	0.485639
systemic acquired resistance	3 out of 116 genes, 2.6%	42 out of 1874 genes, 2.2%	0.487907
innate immune response	5 out of 116 genes, 4.3%	74 out of 1874 genes, 3.9%	0.48863
sulfur amino acid biosynthetic process	5 out of 116 genes, 4.3%	75 out of 1874 genes, 4.0%	0.500821
starch biosynthetic process	4 out of 116 genes, 3.4%	59 out of 1874 genes, 3.1%	0.502243
proteolysis	11 out of 116 genes, 9.5%	172 out of 1874 genes, 9.2%	0.503433
intracellular transport	11 out of 116 genes, 9.5%	172 out of 1874 genes, 9.2%	0.503433
transcription, DNA-dependent	3 out of 116 genes, 2.6%	43 out of 1874 genes, 2.3%	0.503956
RNA biosynthetic process	3 out of 116 genes, 2.6%	43 out of 1874 genes, 2.3%	0.503956
cellular respiration	3 out of 116 genes, 2.6%	43 out of 1874 genes, 2.3%	0.503956
chemical homeostasis	3 out of 116 genes, 2.6%	43 out of 1874 genes, 2.3%	0.503956
cellular modified amino acid biosynthetic process	2 out of 116 genes, 1.7%	27 out of 1874 genes, 1.4%	0.505967
embryo development	6 out of 116 genes, 5.2%	92 out of 1874 genes, 4.9%	0.510633
glucose metabolic process	14 out of 116 genes, 12.1%	222 out of 1874 genes, 11.8%	0.515293
response to chemical stimulus	33 out of 116 genes, 28.4%	529 out of 1874 genes, 28.2%	0.515373
maltose metabolic process	3 out of 116 genes, 2.6%	44 out of 1874 genes, 2.3%	0.519749
response to red light	3 out of 116 genes, 2.6%	44 out of 1874 genes, 2.3%	0.519749
response to far red light	3 out of 116 genes, 2.6%	44 out of 1874 genes, 2.3%	0.519749
response to salt stress	11 out of 116 genes, 9.5%	174 out of 1874 genes, 9.3%	0.519808
microtubule-based process	2 out of 116 genes, 1.7%	28 out of 1874 genes, 1.5%	0.525774
GTP metabolic process	2 out of 116 genes, 1.7%	28 out of 1874 genes, 1.5%	0.525774
regulation of multicellular organismal process	4 out of 116 genes, 3.4%	61 out of 1874 genes, 3.3%	0.529187
regulation of multicellular organismal development	4 out of 116 genes, 3.4%	61 out of 1874 genes, 3.3%	0.529187
cellular response to organic cyclic compound	3 out of 116 genes, 2.6%	45 out of 1874 genes, 2.4%	0.535273
response to oxidative stress	8 out of 116 genes, 6.9%	127 out of 1874 genes, 6.8%	0.535554
cellular polysaccharide biosynthetic process	6 out of 116 genes, 5.2%	95 out of 1874 genes, 5.1%	0.543164
nitrogen compound metabolic process	39 out of 116 genes, 33.6%	632 out of 1874 genes, 33.7%	0.546258
embryo development ending in seed dormancy	5 out of 116 genes, 4.3%	79 out of 1874 genes, 4.2%	0.54843
macromolecule methylation	3 out of 116 genes, 2.6%	46 out of 1874 genes, 2.5%	0.550515
cellular amino acid biosynthetic process	10 out of 116 genes, 8.6%	162 out of 1874 genes, 8.6%	0.555318
secondary metabolite biosynthetic process	4 out of 116 genes, 3.4%	63 out of 1874 genes, 3.4%	0.555422
nucleocytoplasmic transport	2 out of 116 genes, 1.7%	30 out of 1874 genes, 1.6%	0.563773
nuclear transport	2 out of 116 genes, 1.7%	30 out of 1874 genes, 1.6%	0.563773
guanosine-containing compound metabolic process	2 out of 116 genes, 1.7%	30 out of 1874 genes, 1.6%	0.563773
S-glycoside metabolic process	3 out of 116 genes, 2.6%	47 out of 1874 genes, 2.5%	0.565464
glycosinolate metabolic process	3 out of 116 genes, 2.6%	47 out of 1874 genes, 2.5%	0.565464
glucosinolate metabolic process	3 out of 116 genes, 2.6%	47 out of 1874 genes, 2.5%	0.565464
regulation of localization	3 out of 116 genes, 2.6%	47 out of 1874 genes, 2.5%	0.565464
cellular glucan metabolic process	7 out of 116 genes, 6.0%	114 out of 1874 genes, 6.1%	0.568475
positive regulation of cellular process	5 out of 116 genes, 4.3%	81 out of 1874 genes, 4.3%	0.571434
response to osmotic stress	11 out of 116 genes, 9.5%	181 out of 1874 genes, 9.7%	0.575801
glucan metabolic process	7 out of 116 genes, 6.0%	115 out of 1874 genes, 6.1%	0.578118
phenylpropanoid metabolic process	2 out of 116 genes, 1.7%	31 out of 1874 genes, 1.7%	0.581947
macromolecule localization	10 out of 116 genes, 8.6%	166 out of 1874 genes, 8.9%	0.588085
cellular homeostasis	4 out of 116 genes, 3.4%	66 out of 1874 genes, 3.5%	0.593299
disaccharide metabolic process	3 out of 116 genes, 2.6%	49 out of 1874 genes, 2.6%	0.594451
metal ion transport	3 out of 116 genes, 2.6%	49 out of 1874 genes, 2.6%	0.594451
cellular carbohydrate biosynthetic process	6 out of 116 genes, 5.2%	100 out of 1874 genes, 5.3%	0.595229
cellular biogenic amine metabolic process	2 out of 116 genes, 1.7%	32 out of 1874 genes, 1.7%	0.599567
aerobic respiration	2 out of 116 genes, 1.7%	32 out of 1874 genes, 1.7%	0.599567
cellulose metabolic process	2 out of 116 genes, 1.7%	32 out of 1874 genes, 1.7%	0.599567
cellular amine metabolic process	2 out of 116 genes, 1.7%	32 out of 1874 genes, 1.7%	0.599567
divalent metal ion transport	2 out of 116 genes, 1.7%	32 out of 1874 genes, 1.7%	0.599567
divalent inorganic cation transport	2 out of 116 genes, 1.7%	32 out of 1874 genes, 1.7%	0.599567
cellular response to organic substance	5 out of 116 genes, 4.3%	84 out of 1874 genes, 4.5%	0.604798
cellular response to chemical stimulus	7 out of 116 genes, 6.0%	118 out of 1874 genes, 6.3%	0.606436
regulation of cellular process	20 out of 116 genes, 17.2%	334 out of 1874 genes, 17.8%	0.607255
hexose metabolic process	14 out of 116 genes, 12.1%	235 out of 1874 genes, 12.5%	0.607697
positive regulation of gene expression	3 out of 116 genes, 2.6%	50 out of 1874 genes, 2.7%	0.608475
positive regulation of transcription, DNA-dependent	3 out of 116 genes, 2.6%	50 out of 1874 genes, 2.7%	0.608475
positive regulation of nucleobase-containing compound metabolic process	3 out of 116 genes, 2.6%	50 out of 1874 genes, 2.7%	0.608475
positive regulation of nitrogen compound metabolic process	3 out of 116 genes, 2.6%	50 out of 1874 genes, 2.7%	0.608475
positive regulation of RNA metabolic process	3 out of 116 genes, 2.6%	50 out of 1874 genes, 2.7%	0.608475
biosynthetic process	51 out of 116 genes, 44.0%	840 out of 1874 genes, 44.8%	0.612354
organic substance biosynthetic process	49 out of 116 genes, 42.2%	808 out of 1874 genes, 43.1%	0.613898
plastid membrane organization	5 out of 116 genes, 4.3%	85 out of 1874 genes, 4.5%	0.615594
thylakoid membrane organization	5 out of 116 genes, 4.3%	85 out of 1874 genes, 4.5%	0.615594
cellular biosynthetic process	47 out of 116 genes, 40.5%	777 out of 1874 genes, 41.5%	0.620186
response to blue light	3 out of 116 genes, 2.6%	51 out of 1874 genes, 2.7%	0.622178
energy derivation by oxidation of organic compounds	3 out of 116 genes, 2.6%	51 out of 1874 genes, 2.7%	0.622178
homeostatic process	5 out of 116 genes, 4.3%	86 out of 1874 genes, 4.6%	0.626221
protein phosphorylation	2 out of 116 genes, 1.7%	34 out of 1874 genes, 1.8%	0.633134
response to endoplasmic reticulum stress	2 out of 116 genes, 1.7%	34 out of 1874 genes, 1.8%	0.633134
polysaccharide biosynthetic process	6 out of 116 genes, 5.2%	104 out of 1874 genes, 5.5%	0.634599
alcohol metabolic process	3 out of 116 genes, 2.6%	52 out of 1874 genes, 2.8%	0.635556
proteasome core complex assembly	3 out of 116 genes, 2.6%	52 out of 1874 genes, 2.8%	0.635556
organic hydroxy compound metabolic process	3 out of 116 genes, 2.6%	52 out of 1874 genes, 2.8%	0.635556
chloroplast organization	5 out of 116 genes, 4.3%	87 out of 1874 genes, 4.6%	0.636674
cellular response to oxygen-containing compound	5 out of 116 genes, 4.3%	87 out of 1874 genes, 4.6%	0.636674
response to red or far red light	4 out of 116 genes, 3.4%	70 out of 1874 genes, 3.7%	0.640782
root system development	4 out of 116 genes, 3.4%	70 out of 1874 genes, 3.7%	0.640782
root development	4 out of 116 genes, 3.4%	70 out of 1874 genes, 3.7%	0.640782
response to hormone stimulus	7 out of 116 genes, 6.0%	122 out of 1874 genes, 6.5%	0.642635
oligosaccharide metabolic process	3 out of 116 genes, 2.6%	53 out of 1874 genes, 2.8%	0.648607
hormone biosynthetic process	2 out of 116 genes, 1.7%	35 out of 1874 genes, 1.9%	0.649086
beta-glucan metabolic process	2 out of 116 genes, 1.7%	35 out of 1874 genes, 1.9%	0.649086
monosaccharide metabolic process	14 out of 116 genes, 12.1%	242 out of 1874 genes, 12.9%	0.654205
glycolysis	5 out of 116 genes, 4.3%	89 out of 1874 genes, 4.7%	0.657046
alpha-amino acid metabolic process	9 out of 116 genes, 7.8%	158 out of 1874 genes, 8.4%	0.6578
response to endogenous stimulus	7 out of 116 genes, 6.0%	124 out of 1874 genes, 6.6%	0.660016
cellular polysaccharide metabolic process	7 out of 116 genes, 6.0%	124 out of 1874 genes, 6.6%	0.660016
root morphogenesis	3 out of 116 genes, 2.6%	54 out of 1874 genes, 2.9%	0.661328
cation homeostasis	2 out of 116 genes, 1.7%	36 out of 1874 genes, 1.9%	0.664489
positive regulation of biological process	5 out of 116 genes, 4.3%	90 out of 1874 genes, 4.8%	0.66696
phosphorylation	6 out of 116 genes, 5.2%	108 out of 1874 genes, 5.8%	0.671697
aromatic amino acid family metabolic process	3 out of 116 genes, 2.6%	55 out of 1874 genes, 2.9%	0.673718
positive regulation of macromolecule biosynthetic process	3 out of 116 genes, 2.6%	55 out of 1874 genes, 2.9%	0.673718
response to organic cyclic compound	3 out of 116 genes, 2.6%	55 out of 1874 genes, 2.9%	0.673718
cell wall biogenesis	2 out of 116 genes, 1.7%	37 out of 1874 genes, 2.0%	0.67935
cellular response to stimulus	14 out of 116 genes, 12.1%	246 out of 1874 genes, 13.1%	0.67949
proteasome assembly	3 out of 116 genes, 2.6%	56 out of 1874 genes, 3.0%	0.685776
response to misfolded protein	3 out of 116 genes, 2.6%	56 out of 1874 genes, 3.0%	0.685776
water transport	2 out of 116 genes, 1.7%	38 out of 1874 genes, 2.0%	0.693676
fluid transport	2 out of 116 genes, 1.7%	38 out of 1874 genes, 2.0%	0.693676
regulation of ion transport	2 out of 116 genes, 1.7%	38 out of 1874 genes, 2.0%	0.693676
ion homeostasis	2 out of 116 genes, 1.7%	38 out of 1874 genes, 2.0%	0.693676
positive regulation of macromolecule metabolic process	3 out of 116 genes, 2.6%	57 out of 1874 genes, 3.0%	0.697504
protein catabolic process	6 out of 116 genes, 5.2%	111 out of 1874 genes, 5.9%	0.697936
seed development	5 out of 116 genes, 4.3%	94 out of 1874 genes, 5.0%	0.704756
cell wall organization or biogenesis	5 out of 116 genes, 4.3%	94 out of 1874 genes, 5.0%	0.704756
aromatic compound catabolic process	4 out of 116 genes, 3.4%	76 out of 1874 genes, 4.1%	0.705033
regulation of developmental process	4 out of 116 genes, 3.4%	76 out of 1874 genes, 4.1%	0.705033
hormone metabolic process	2 out of 116 genes, 1.7%	39 out of 1874 genes, 2.1%	0.707475
cell redox homeostasis	2 out of 116 genes, 1.7%	39 out of 1874 genes, 2.1%	0.707475
meristem development	2 out of 116 genes, 1.7%	39 out of 1874 genes, 2.1%	0.707475
gluconeogenesis	3 out of 116 genes, 2.6%	58 out of 1874 genes, 3.1%	0.708903
hexose biosynthetic process	3 out of 116 genes, 2.6%	58 out of 1874 genes, 3.1%	0.708903
single-organism carbohydrate metabolic process	19 out of 116 genes, 16.4%	337 out of 1874 genes, 18.0%	0.716798
response to topologically incorrect protein	3 out of 116 genes, 2.6%	59 out of 1874 genes, 3.1%	0.719974
plant-type cell wall organization	2 out of 116 genes, 1.7%	40 out of 1874 genes, 2.1%	0.720758
regulation of transport	2 out of 116 genes, 1.7%	40 out of 1874 genes, 2.1%	0.720758
cellular amino acid metabolic process	13 out of 116 genes, 11.2%	236 out of 1874 genes, 12.6%	0.721926
fruit development	5 out of 116 genes, 4.3%	96 out of 1874 genes, 5.1%	0.722521
response to external stimulus	3 out of 116 genes, 2.6%	60 out of 1874 genes, 3.2%	0.73072
cell differentiation	5 out of 116 genes, 4.3%	97 out of 1874 genes, 5.2%	0.731118
cellular nitrogen compound catabolic process	4 out of 116 genes, 3.4%	79 out of 1874 genes, 4.2%	0.733929
monosaccharide biosynthetic process	3 out of 116 genes, 2.6%	61 out of 1874 genes, 3.3%	0.741144
heterocycle catabolic process	4 out of 116 genes, 3.4%	80 out of 1874 genes, 4.3%	0.743083
polysaccharide metabolic process	7 out of 116 genes, 6.0%	135 out of 1874 genes, 7.2%	0.746288
vesicle-mediated transport	3 out of 116 genes, 2.6%	62 out of 1874 genes, 3.3%	0.75125
organic cyclic compound catabolic process	4 out of 116 genes, 3.4%	81 out of 1874 genes, 4.3%	0.752
RNA modification	2 out of 116 genes, 1.7%	43 out of 1874 genes, 2.3%	0.757614
S-glycoside biosynthetic process	2 out of 116 genes, 1.7%	43 out of 1874 genes, 2.3%	0.757614
protein import	2 out of 116 genes, 1.7%	43 out of 1874 genes, 2.3%	0.757614
glycosinolate biosynthetic process	2 out of 116 genes, 1.7%	43 out of 1874 genes, 2.3%	0.757614
glucosinolate biosynthetic process	2 out of 116 genes, 1.7%	43 out of 1874 genes, 2.3%	0.757614
Golgi vesicle transport	2 out of 116 genes, 1.7%	43 out of 1874 genes, 2.3%	0.757614
organic acid catabolic process	4 out of 116 genes, 3.4%	82 out of 1874 genes, 4.4%	0.760681
carboxylic acid catabolic process	4 out of 116 genes, 3.4%	82 out of 1874 genes, 4.4%	0.760681
response to stimulus	51 out of 116 genes, 44.0%	876 out of 1874 genes, 46.7%	0.762509
carbohydrate biosynthetic process	9 out of 116 genes, 7.8%	174 out of 1874 genes, 9.3%	0.768026
small molecule catabolic process	4 out of 116 genes, 3.4%	83 out of 1874 genes, 4.4%	0.769129
single-organism catabolic process	4 out of 116 genes, 3.4%	83 out of 1874 genes, 4.4%	0.769129
single-organism cellular process	45 out of 116 genes, 38.8%	782 out of 1874 genes, 41.7%	0.775485
response to carbohydrate stimulus	3 out of 116 genes, 2.6%	65 out of 1874 genes, 3.5%	0.779699
cell cycle process	2 out of 116 genes, 1.7%	46 out of 1874 genes, 2.5%	0.790231
cellular carbohydrate metabolic process	7 out of 116 genes, 6.0%	142 out of 1874 genes, 7.6%	0.79265
cellular membrane organization	5 out of 116 genes, 4.3%	105 out of 1874 genes, 5.6%	0.793094
membrane organization	5 out of 116 genes, 4.3%	105 out of 1874 genes, 5.6%	0.793094
macromolecule catabolic process	7 out of 116 genes, 6.0%	143 out of 1874 genes, 7.6%	0.798731
cellular catabolic process	14 out of 116 genes, 12.1%	268 out of 1874 genes, 14.3%	0.798949
cell cycle	2 out of 116 genes, 1.7%	47 out of 1874 genes, 2.5%	0.800221
carbohydrate metabolic process	22 out of 116 genes, 19.0%	408 out of 1874 genes, 21.8%	0.807218
developmental growth	2 out of 116 genes, 1.7%	48 out of 1874 genes, 2.6%	0.809791
response to organic substance	13 out of 116 genes, 11.2%	255 out of 1874 genes, 13.6%	0.819698
establishment of localization in cell	11 out of 116 genes, 9.5%	221 out of 1874 genes, 11.8%	0.827047
methylation	3 out of 116 genes, 2.6%	72 out of 1874 genes, 3.8%	0.835846
response to abscisic acid stimulus	2 out of 116 genes, 1.7%	51 out of 1874 genes, 2.7%	0.836114
carbohydrate derivative biosynthetic process	7 out of 116 genes, 6.0%	150 out of 1874 genes, 8.0%	0.837626
single-organism transport	15 out of 116 genes, 12.9%	297 out of 1874 genes, 15.8%	0.846539
plant-type cell wall organization or biogenesis	2 out of 116 genes, 1.7%	53 out of 1874 genes, 2.8%	0.851804
ubiquitin-dependent protein catabolic process	3 out of 116 genes, 2.6%	75 out of 1874 genes, 4.0%	0.855907
amine metabolic process	2 out of 116 genes, 1.7%	54 out of 1874 genes, 2.9%	0.85913
cellular developmental process	5 out of 116 genes, 4.3%	116 out of 1874 genes, 6.2%	0.859619
modification-dependent protein catabolic process	3 out of 116 genes, 2.6%	76 out of 1874 genes, 4.1%	0.862108
modification-dependent macromolecule catabolic process	3 out of 116 genes, 2.6%	76 out of 1874 genes, 4.1%	0.862108
cytoskeleton organization	2 out of 116 genes, 1.7%	55 out of 1874 genes, 2.9%	0.866127
transport	17 out of 116 genes, 14.7%	342 out of 1874 genes, 18.2%	0.878731
alpha-amino acid biosynthetic process	5 out of 116 genes, 4.3%	120 out of 1874 genes, 6.4%	0.878975
response to alcohol	2 out of 116 genes, 1.7%	57 out of 1874 genes, 3.0%	0.879181
cellular localization	11 out of 116 genes, 9.5%	235 out of 1874 genes, 12.5%	0.882298
regulation of biological quality	7 out of 116 genes, 6.0%	160 out of 1874 genes, 8.5%	0.882712
response to lipid	2 out of 116 genes, 1.7%	60 out of 1874 genes, 3.2%	0.896591
cellular protein catabolic process	4 out of 116 genes, 3.4%	104 out of 1874 genes, 5.5%	0.89813
single-organism process	51 out of 116 genes, 44.0%	924 out of 1874 genes, 49.3%	0.900525
regulation of hormone levels	2 out of 116 genes, 1.7%	63 out of 1874 genes, 3.4%	0.911662
cell growth	2 out of 116 genes, 1.7%	63 out of 1874 genes, 3.4%	0.911662
tissue development	3 out of 116 genes, 2.6%	87 out of 1874 genes, 4.6%	0.916365
cell wall organization	2 out of 116 genes, 1.7%	65 out of 1874 genes, 3.5%	0.920549
external encapsulating structure organization	2 out of 116 genes, 1.7%	66 out of 1874 genes, 3.5%	0.924673
cytoplasmic transport	4 out of 116 genes, 3.4%	112 out of 1874 genes, 6.0%	0.927469
protein localization to organelle	3 out of 116 genes, 2.6%	91 out of 1874 genes, 4.9%	0.93074
proteolysis involved in cellular protein catabolic process	3 out of 116 genes, 2.6%	92 out of 1874 genes, 4.9%	0.933965
growth	2 out of 116 genes, 1.7%	69 out of 1874 genes, 3.7%	0.935877
cellular macromolecule catabolic process	4 out of 116 genes, 3.4%	116 out of 1874 genes, 6.2%	0.939108
establishment of protein localization to organelle	2 out of 116 genes, 1.7%	73 out of 1874 genes, 3.9%	0.948396
cellular response to stress	4 out of 116 genes, 3.4%	122 out of 1874 genes, 6.5%	0.953436
establishment of localization	17 out of 116 genes, 14.7%	382 out of 1874 genes, 20.4%	0.959718
localization	17 out of 116 genes, 14.7%	399 out of 1874 genes, 21.3%	0.976396

## Sheet: cellular component
Gene Ontology term	Cluster frequency	Protein frequency of use	P-value
thylakoid part	35 out of 115 genes, 30.4%	234 out of 1875 genes, 12.5%	1.02819e-07
thylakoid	42 out of 115 genes, 36.5%	319 out of 1875 genes, 17.0%	1.5464e-07
thylakoid membrane	32 out of 115 genes, 27.8%	209 out of 1875 genes, 11.1%	2.51264e-07
membrane	82 out of 115 genes, 71.3%	912 out of 1875 genes, 48.6%	3.14668e-07
chloroplast thylakoid membrane	31 out of 115 genes, 27.0%	201 out of 1875 genes, 10.7%	3.47311e-07
plastid thylakoid membrane	31 out of 115 genes, 27.0%	201 out of 1875 genes, 10.7%	3.47311e-07
photosynthetic membrane	32 out of 115 genes, 27.8%	215 out of 1875 genes, 11.5%	4.99183e-07
chloroplast thylakoid	35 out of 115 genes, 30.4%	255 out of 1875 genes, 13.6%	9.56023e-07
plastid thylakoid	35 out of 115 genes, 30.4%	255 out of 1875 genes, 13.6%	9.56023e-07
organelle subcompartment	35 out of 115 genes, 30.4%	255 out of 1875 genes, 13.6%	9.56023e-07
photosystem	12 out of 115 genes, 10.4%	42 out of 1875 genes, 2.2%	3.70975e-06
intracellular organelle part	80 out of 115 genes, 69.6%	946 out of 1875 genes, 50.5%	1.43184e-05
thylakoid lumen	13 out of 115 genes, 11.3%	55 out of 1875 genes, 2.9%	1.43835e-05
light-harvesting complex	5 out of 115 genes, 4.3%	7 out of 1875 genes, 0.4%	1.51747e-05
chloroplast part	59 out of 115 genes, 51.3%	613 out of 1875 genes, 32.7%	1.55276e-05
organelle part	80 out of 115 genes, 69.6%	948 out of 1875 genes, 50.6%	1.5865e-05
plastid part	59 out of 115 genes, 51.3%	614 out of 1875 genes, 32.7%	1.6446e-05
macromolecular complex	46 out of 115 genes, 40.0%	433 out of 1875 genes, 23.1%	2.10957e-05
photosystem II	9 out of 115 genes, 7.8%	28 out of 1875 genes, 1.5%	2.31636e-05
chloroplast	79 out of 115 genes, 68.7%	959 out of 1875 genes, 51.1%	6.33752e-05
membrane part	30 out of 115 genes, 26.1%	245 out of 1875 genes, 13.1%	7.7283e-05
plastid	80 out of 115 genes, 69.6%	990 out of 1875 genes, 52.8%	0.000120988
chloroplast thylakoid lumen	9 out of 115 genes, 7.8%	37 out of 1875 genes, 2.0%	0.000260519
plastid thylakoid lumen	9 out of 115 genes, 7.8%	37 out of 1875 genes, 2.0%	0.000260519
protein complex	28 out of 115 genes, 24.3%	256 out of 1875 genes, 13.7%	0.00101369
chloroplast envelope	31 out of 115 genes, 27.0%	296 out of 1875 genes, 15.8%	0.00108571
plastid envelope	31 out of 115 genes, 27.0%	304 out of 1875 genes, 16.2%	0.001721
large ribosomal subunit	9 out of 115 genes, 7.8%	51 out of 1875 genes, 2.7%	0.00306893
integral to membrane	13 out of 115 genes, 11.3%	92 out of 1875 genes, 4.9%	0.00315176
organelle envelope	35 out of 115 genes, 30.4%	380 out of 1875 genes, 20.3%	0.0049866
envelope	35 out of 115 genes, 30.4%	380 out of 1875 genes, 20.3%	0.0049866
cytosolic ribosome	15 out of 115 genes, 13.0%	120 out of 1875 genes, 6.4%	0.00515574
oxygen evolving complex	4 out of 115 genes, 3.5%	14 out of 1875 genes, 0.7%	0.0083216
ribosomal subunit	11 out of 115 genes, 9.6%	82 out of 1875 genes, 4.4%	0.0097515
intrinsic to membrane	15 out of 115 genes, 13.0%	129 out of 1875 genes, 6.9%	0.0101343
cytosolic large ribosomal subunit	7 out of 115 genes, 6.1%	42 out of 1875 genes, 2.2%	0.0122048
cytosolic part	15 out of 115 genes, 13.0%	133 out of 1875 genes, 7.1%	0.0133191
photosystem I	4 out of 115 genes, 3.5%	16 out of 1875 genes, 0.9%	0.0137534
chloroplast photosystem II	3 out of 115 genes, 2.6%	9 out of 1875 genes, 0.5%	0.0143836
vacuole	23 out of 115 genes, 20.0%	239 out of 1875 genes, 12.7%	0.0153786
ribosome	17 out of 115 genes, 14.8%	163 out of 1875 genes, 8.7%	0.0179742
proton-transporting ATP synthase complex, catalytic core F(1)	3 out of 115 genes, 2.6%	10 out of 1875 genes, 0.5%	0.0196415
proton-transporting ATP synthase complex	4 out of 115 genes, 3.5%	18 out of 1875 genes, 1.0%	0.0210278
chromatin	3 out of 115 genes, 2.6%	11 out of 1875 genes, 0.6%	0.0258191
cell periphery	47 out of 115 genes, 40.9%	606 out of 1875 genes, 32.3%	0.0289452
cytoplasmic part	102 out of 115 genes, 88.7%	1537 out of 1875 genes, 82.0%	0.030297
chloroplast stroma	31 out of 115 genes, 27.0%	369 out of 1875 genes, 19.7%	0.0316244
chromosomal part	3 out of 115 genes, 2.6%	12 out of 1875 genes, 0.6%	0.032916
magnesium chelatase complex	2 out of 115 genes, 1.7%	5 out of 1875 genes, 0.3%	0.0330074
plastid stroma	31 out of 115 genes, 27.0%	373 out of 1875 genes, 19.9%	0.0362966
plasma membrane	39 out of 115 genes, 33.9%	493 out of 1875 genes, 26.3%	0.0377609
plastoglobule	6 out of 115 genes, 5.2%	42 out of 1875 genes, 2.2%	0.0399527
vacuolar membrane	12 out of 115 genes, 10.4%	115 out of 1875 genes, 6.1%	0.0445912
vacuolar part	12 out of 115 genes, 10.4%	116 out of 1875 genes, 6.2%	0.0472037
chloroplast stromal thylakoid	2 out of 115 genes, 1.7%	6 out of 1875 genes, 0.3%	0.047549
non-membrane-bounded organelle	24 out of 115 genes, 20.9%	281 out of 1875 genes, 15.0%	0.0497777
intracellular non-membrane-bounded organelle	24 out of 115 genes, 20.9%	281 out of 1875 genes, 15.0%	0.0497777
organelle membrane	19 out of 115 genes, 16.5%	212 out of 1875 genes, 11.3%	0.0524968
respiratory chain	5 out of 115 genes, 4.3%	34 out of 1875 genes, 1.8%	0.0530637
ribonucleoprotein complex	17 out of 115 genes, 14.8%	186 out of 1875 genes, 9.9%	0.0560528
extrinsic to membrane	3 out of 115 genes, 2.6%	15 out of 1875 genes, 0.8%	0.0595587
nuclear lumen	14 out of 115 genes, 12.2%	150 out of 1875 genes, 8.0%	0.0693378
proton-transporting two-sector ATPase complex	4 out of 115 genes, 3.5%	26 out of 1875 genes, 1.4%	0.0705379
organelle lumen	15 out of 115 genes, 13.0%	166 out of 1875 genes, 8.9%	0.0768071
intracellular organelle lumen	15 out of 115 genes, 13.0%	166 out of 1875 genes, 8.9%	0.0768071
nucleolus	13 out of 115 genes, 11.3%	139 out of 1875 genes, 7.4%	0.0777087
apoplast	16 out of 115 genes, 13.9%	181 out of 1875 genes, 9.7%	0.0805199
membrane-enclosed lumen	15 out of 115 genes, 13.0%	168 out of 1875 genes, 9.0%	0.0834052
proton-transporting two-sector ATPase complex, catalytic domain	3 out of 115 genes, 2.6%	18 out of 1875 genes, 1.0%	0.0935727
mitochondrial respiratory chain	4 out of 115 genes, 3.5%	31 out of 1875 genes, 1.7%	0.117786
nuclear part	14 out of 115 genes, 12.2%	165 out of 1875 genes, 8.8%	0.127226
chromosome	3 out of 115 genes, 2.6%	21 out of 1875 genes, 1.1%	0.133792
cytoplasm	104 out of 115 genes, 90.4%	1629 out of 1875 genes, 86.9%	0.152489
stromule	4 out of 115 genes, 3.5%	35 out of 1875 genes, 1.9%	0.16322
chloroplast membrane	3 out of 115 genes, 2.6%	23 out of 1875 genes, 1.2%	0.163388
mitochondrial matrix	2 out of 115 genes, 1.7%	12 out of 1875 genes, 0.6%	0.164879
chloroplast inner membrane	2 out of 115 genes, 1.7%	12 out of 1875 genes, 0.6%	0.164879
plastid membrane	3 out of 115 genes, 2.6%	25 out of 1875 genes, 1.3%	0.194729
intracellular membrane-bounded organelle	97 out of 115 genes, 84.3%	1516 out of 1875 genes, 80.9%	0.196253
membrane-bounded organelle	97 out of 115 genes, 84.3%	1517 out of 1875 genes, 80.9%	0.200347
extracellular region	20 out of 115 genes, 17.4%	269 out of 1875 genes, 14.3%	0.202241
plastid inner membrane	2 out of 115 genes, 1.7%	14 out of 1875 genes, 0.7%	0.210351
outer membrane	3 out of 115 genes, 2.6%	26 out of 1875 genes, 1.4%	0.210928
organelle outer membrane	3 out of 115 genes, 2.6%	26 out of 1875 genes, 1.4%	0.210928
organelle inner membrane	6 out of 115 genes, 5.2%	67 out of 1875 genes, 3.6%	0.224667
mitochondrial membrane part	4 out of 115 genes, 3.5%	41 out of 1875 genes, 2.2%	0.240794
intracellular organelle	98 out of 115 genes, 85.2%	1544 out of 1875 genes, 82.3%	0.243572
organelle	98 out of 115 genes, 85.2%	1545 out of 1875 genes, 82.4%	0.248365
anchored to plasma membrane	3 out of 115 genes, 2.6%	32 out of 1875 genes, 1.7%	0.312559
intrinsic to plasma membrane	3 out of 115 genes, 2.6%	33 out of 1875 genes, 1.8%	0.32984
cytoplasmic membrane-bounded vesicle	4 out of 115 genes, 3.5%	49 out of 1875 genes, 2.6%	0.353742
cytoplasmic vesicle	4 out of 115 genes, 3.5%	49 out of 1875 genes, 2.6%	0.353742
vesicle	4 out of 115 genes, 3.5%	50 out of 1875 genes, 2.7%	0.368112
membrane-bounded vesicle	4 out of 115 genes, 3.5%	50 out of 1875 genes, 2.7%	0.368112
mitochondrial inner membrane	4 out of 115 genes, 3.5%	53 out of 1875 genes, 2.8%	0.411073
cytosolic small ribosomal subunit	2 out of 115 genes, 1.7%	23 out of 1875 genes, 1.2%	0.417061
anchored to membrane	3 out of 115 genes, 2.6%	42 out of 1875 genes, 2.2%	0.481646
plasma membrane part	3 out of 115 genes, 2.6%	44 out of 1875 genes, 2.3%	0.513389
cell	113 out of 115 genes, 98.3%	1833 out of 1875 genes, 97.8%	0.518354
cell part	113 out of 115 genes, 98.3%	1833 out of 1875 genes, 97.8%	0.518354
mitochondrial membrane	4 out of 115 genes, 3.5%	64 out of 1875 genes, 3.4%	0.560736
cell wall	13 out of 115 genes, 11.3%	215 out of 1875 genes, 11.5%	0.569096
external encapsulating structure	13 out of 115 genes, 11.3%	215 out of 1875 genes, 11.5%	0.569096
mitochondrial part	5 out of 115 genes, 4.3%	82 out of 1875 genes, 4.4%	0.574246
small ribosomal subunit	2 out of 115 genes, 1.7%	31 out of 1875 genes, 1.7%	0.57679
intracellular	106 out of 115 genes, 92.2%	1728 out of 1875 genes, 92.2%	0.585599
endoplasmic reticulum	4 out of 115 genes, 3.5%	66 out of 1875 genes, 3.5%	0.585796
proteasome complex	2 out of 115 genes, 1.7%	32 out of 1875 genes, 1.7%	0.594406
intracellular part	105 out of 115 genes, 91.3%	1717 out of 1875 genes, 91.6%	0.625174
cytosol	33 out of 115 genes, 28.7%	557 out of 1875 genes, 29.7%	0.632664
endomembrane system	2 out of 115 genes, 1.7%	35 out of 1875 genes, 1.9%	0.643975
Golgi apparatus	7 out of 115 genes, 6.1%	124 out of 1875 genes, 6.6%	0.650218
mitochondrial envelope	4 out of 115 genes, 3.5%	73 out of 1875 genes, 3.9%	0.666739
nucleus	27 out of 115 genes, 23.5%	465 out of 1875 genes, 24.8%	0.668832
plant-type cell wall	4 out of 115 genes, 3.5%	75 out of 1875 genes, 4.0%	0.687811
mitochondrion	21 out of 115 genes, 18.3%	375 out of 1875 genes, 20.0%	0.721602
cell-cell junction	4 out of 115 genes, 3.5%	113 out of 1875 genes, 6.0%	0.927358
plasmodesma	4 out of 115 genes, 3.5%	113 out of 1875 genes, 6.0%	0.927358
symplast	4 out of 115 genes, 3.5%	113 out of 1875 genes, 6.0%	0.927358
cell junction	4 out of 115 genes, 3.5%	116 out of 1875 genes, 6.2%	0.936192

## Sheet: molecular function
Gene Ontology term	Cluster frequency	Protein frequency of use	P-value
cation binding	42 out of 106 genes, 39.6%	428 out of 1768 genes, 24.2%	0.000202918
chlorophyll binding	5 out of 106 genes, 4.7%	11 out of 1768 genes, 0.6%	0.000244065
metal ion binding	40 out of 106 genes, 37.7%	403 out of 1768 genes, 22.8%	0.000245623
peptidyl-prolyl cis-trans isomerase activity	7 out of 106 genes, 6.6%	23 out of 1768 genes, 1.3%	0.000252345
cis-trans isomerase activity	7 out of 106 genes, 6.6%	23 out of 1768 genes, 1.3%	0.000252345
electron carrier activity	11 out of 106 genes, 10.4%	71 out of 1768 genes, 4.0%	0.00260961
copper ion binding	14 out of 106 genes, 13.2%	104 out of 1768 genes, 5.9%	0.0027456
transition metal ion binding	25 out of 106 genes, 23.6%	241 out of 1768 genes, 13.6%	0.00293672
rRNA binding	5 out of 106 genes, 4.7%	18 out of 1768 genes, 1.0%	0.00322431
phosphatidylinositol-5-phosphate binding	2 out of 106 genes, 1.9%	2 out of 1768 genes, 0.1%	0.00356268
lysine N-methyltransferase activity	2 out of 106 genes, 1.9%	2 out of 1768 genes, 0.1%	0.00356268
protein-lysine N-methyltransferase activity	2 out of 106 genes, 1.9%	2 out of 1768 genes, 0.1%	0.00356268
metallochaperone activity	2 out of 106 genes, 1.9%	2 out of 1768 genes, 0.1%	0.00356268
copper chaperone activity	2 out of 106 genes, 1.9%	2 out of 1768 genes, 0.1%	0.00356268
histone-lysine N-methyltransferase activity	2 out of 106 genes, 1.9%	2 out of 1768 genes, 0.1%	0.00356268
binding	82 out of 106 genes, 77.4%	1170 out of 1768 genes, 66.2%	0.00683996
hydrogen ion transmembrane transporter activity	7 out of 106 genes, 6.6%	40 out of 1768 genes, 2.3%	0.00821655
tetrapyrrole binding	8 out of 106 genes, 7.5%	50 out of 1768 genes, 2.8%	0.00833011
regulatory region DNA binding	2 out of 106 genes, 1.9%	3 out of 1768 genes, 0.2%	0.0102684
regulatory region nucleic acid binding	2 out of 106 genes, 1.9%	3 out of 1768 genes, 0.2%	0.0102684
N-methyltransferase activity	2 out of 106 genes, 1.9%	3 out of 1768 genes, 0.2%	0.0102684
histone methyltransferase activity	2 out of 106 genes, 1.9%	3 out of 1768 genes, 0.2%	0.0102684
transcription regulatory region DNA binding	2 out of 106 genes, 1.9%	3 out of 1768 genes, 0.2%	0.0102684
electron transporter, transferring electrons within cytochrome b6/f complex of photosystem II activity	2 out of 106 genes, 1.9%	3 out of 1768 genes, 0.2%	0.0102684
monovalent inorganic cation transmembrane transporter activity	7 out of 106 genes, 6.6%	42 out of 1768 genes, 2.4%	0.010767
superoxide dismutase activity	3 out of 106 genes, 2.8%	9 out of 1768 genes, 0.5%	0.013498
macrolide binding	3 out of 106 genes, 2.8%	9 out of 1768 genes, 0.5%	0.013498
FK506 binding	3 out of 106 genes, 2.8%	9 out of 1768 genes, 0.5%	0.013498
oxidoreductase activity, acting on superoxide radicals as acceptor	3 out of 106 genes, 2.8%	9 out of 1768 genes, 0.5%	0.013498
inorganic cation transmembrane transporter activity	7 out of 106 genes, 6.6%	46 out of 1768 genes, 2.6%	0.017525
drug binding	3 out of 106 genes, 2.8%	10 out of 1768 genes, 0.6%	0.0184526
poly-pyrimidine tract binding	3 out of 106 genes, 2.8%	10 out of 1768 genes, 0.6%	0.0184526
poly(U) RNA binding	3 out of 106 genes, 2.8%	10 out of 1768 genes, 0.6%	0.0184526
microtubule-severing ATPase activity	3 out of 106 genes, 2.8%	10 out of 1768 genes, 0.6%	0.0184526
substrate-specific transmembrane transporter activity	10 out of 106 genes, 9.4%	80 out of 1768 genes, 4.5%	0.0185855
proton-transporting ATP synthase activity, rotational mechanism	4 out of 106 genes, 3.8%	18 out of 1768 genes, 1.0%	0.0194463
water transmembrane transporter activity	2 out of 106 genes, 1.9%	4 out of 1768 genes, 0.2%	0.0197343
protein methyltransferase activity	2 out of 106 genes, 1.9%	4 out of 1768 genes, 0.2%	0.0197343
water channel activity	2 out of 106 genes, 1.9%	4 out of 1768 genes, 0.2%	0.0197343
electron transporter, transferring electrons within the cyclic electron transport pathway of photosynthesis activity	2 out of 106 genes, 1.9%	4 out of 1768 genes, 0.2%	0.0197343
iron ion binding	5 out of 106 genes, 4.7%	28 out of 1768 genes, 1.6%	0.0228978
metalloendopeptidase activity	3 out of 106 genes, 2.8%	11 out of 1768 genes, 0.6%	0.0242829
cation transmembrane transporter activity	7 out of 106 genes, 6.6%	51 out of 1768 genes, 2.9%	0.029623
iron-sulfur cluster binding	5 out of 106 genes, 4.7%	30 out of 1768 genes, 1.7%	0.0301898
metal cluster binding	5 out of 106 genes, 4.7%	30 out of 1768 genes, 1.7%	0.0301898
single-stranded RNA binding	3 out of 106 genes, 2.8%	12 out of 1768 genes, 0.7%	0.0309911
phosphatidylinositol phosphate binding	2 out of 106 genes, 1.9%	5 out of 1768 genes, 0.3%	0.0316114
transmembrane transporter activity	10 out of 106 genes, 9.4%	87 out of 1768 genes, 4.9%	0.0317089
ATPase activity, coupled to transmembrane movement of ions, rotational mechanism	4 out of 106 genes, 3.8%	22 out of 1768 genes, 1.2%	0.0386661
substrate-specific transporter activity	10 out of 106 genes, 9.4%	91 out of 1768 genes, 5.1%	0.0416363
structural constituent of ribosome	12 out of 106 genes, 11.3%	117 out of 1768 genes, 6.6%	0.0426602
antioxidant activity	6 out of 106 genes, 5.7%	44 out of 1768 genes, 2.5%	0.0441904
magnesium chelatase activity	2 out of 106 genes, 1.9%	6 out of 1768 genes, 0.3%	0.0455821
ligase activity, forming nitrogen-metal bonds	2 out of 106 genes, 1.9%	6 out of 1768 genes, 0.3%	0.0455821
ligase activity, forming nitrogen-metal bonds, forming coordination complexes	2 out of 106 genes, 1.9%	6 out of 1768 genes, 0.3%	0.0455821
peroxiredoxin activity	2 out of 106 genes, 1.9%	6 out of 1768 genes, 0.3%	0.0455821
4 iron, 4 sulfur cluster binding	3 out of 106 genes, 2.8%	14 out of 1768 genes, 0.8%	0.0469987
isomerase activity	9 out of 106 genes, 8.5%	83 out of 1768 genes, 4.7%	0.0560567
ATPase activity, coupled	7 out of 106 genes, 6.6%	59 out of 1768 genes, 3.3%	0.0589636
transporter activity	11 out of 106 genes, 10.4%	111 out of 1768 genes, 6.3%	0.0632552
cation-transporting ATPase activity	4 out of 106 genes, 3.8%	28 out of 1768 genes, 1.6%	0.0823414
structural molecule activity	13 out of 106 genes, 12.3%	144 out of 1768 genes, 8.1%	0.0835348
ion binding	50 out of 106 genes, 47.2%	714 out of 1768 genes, 40.4%	0.0865511
ion transmembrane transporter activity	7 out of 106 genes, 6.6%	65 out of 1768 genes, 3.7%	0.0898371
ATPase activity	7 out of 106 genes, 6.6%	66 out of 1768 genes, 3.7%	0.0957358
phosphatidylinositol binding	2 out of 106 genes, 1.9%	9 out of 1768 genes, 0.5%	0.0972967
2 iron, 2 sulfur cluster binding	2 out of 106 genes, 1.9%	9 out of 1768 genes, 0.5%	0.0972967
heterocyclic compound binding	51 out of 106 genes, 48.1%	736 out of 1768 genes, 41.6%	0.0980892
metallopeptidase activity	3 out of 106 genes, 2.8%	19 out of 1768 genes, 1.1%	0.100874
proton-transporting ATPase activity, rotational mechanism	3 out of 106 genes, 2.8%	19 out of 1768 genes, 1.1%	0.100874
organic cyclic compound binding	51 out of 106 genes, 48.1%	738 out of 1768 genes, 41.7%	0.102409
primary active transmembrane transporter activity	5 out of 106 genes, 4.7%	42 out of 1768 genes, 2.4%	0.102496
P-P-bond-hydrolysis-driven transmembrane transporter activity	5 out of 106 genes, 4.7%	42 out of 1768 genes, 2.4%	0.102496
RNA binding	13 out of 106 genes, 12.3%	150 out of 1768 genes, 8.5%	0.107153
S-adenosylmethionine-dependent methyltransferase activity	2 out of 106 genes, 1.9%	10 out of 1768 genes, 0.6%	0.117008
ATPase activity, coupled to transmembrane movement of ions	4 out of 106 genes, 3.8%	32 out of 1768 genes, 1.8%	0.120774
phospholipid binding	3 out of 106 genes, 2.8%	21 out of 1768 genes, 1.2%	0.127154
nucleic acid binding	19 out of 106 genes, 17.9%	244 out of 1768 genes, 13.8%	0.131659
DNA binding	5 out of 106 genes, 4.7%	47 out of 1768 genes, 2.7%	0.146606
ATPase activity, coupled to transmembrane movement of substances	4 out of 106 genes, 3.8%	35 out of 1768 genes, 2.0%	0.153808
ATPase activity, coupled to movement of substances	4 out of 106 genes, 3.8%	35 out of 1768 genes, 2.0%	0.153808
channel activity	2 out of 106 genes, 1.9%	12 out of 1768 genes, 0.7%	0.158938
passive transmembrane transporter activity	2 out of 106 genes, 1.9%	12 out of 1768 genes, 0.7%	0.158938
substrate-specific channel activity	2 out of 106 genes, 1.9%	12 out of 1768 genes, 0.7%	0.158938
hydrolase activity, acting on acid anhydrides, catalyzing transmembrane movement of substances	4 out of 106 genes, 3.8%	36 out of 1768 genes, 2.0%	0.165516
peptidase activity	10 out of 106 genes, 9.4%	119 out of 1768 genes, 6.7%	0.170033
endopeptidase activity	6 out of 106 genes, 5.7%	64 out of 1768 genes, 3.6%	0.181019
active transmembrane transporter activity	5 out of 106 genes, 4.7%	54 out of 1768 genes, 3.1%	0.219377
peptidase activity, acting on L-amino acid peptides	8 out of 106 genes, 7.5%	102 out of 1768 genes, 5.8%	0.263996
disulfide oxidoreductase activity	3 out of 106 genes, 2.8%	30 out of 1768 genes, 1.7%	0.266603
methyltransferase activity	3 out of 106 genes, 2.8%	31 out of 1768 genes, 1.8%	0.283326
nucleoside-triphosphatase activity	8 out of 106 genes, 7.5%	105 out of 1768 genes, 5.9%	0.290811
oxidoreductase activity	27 out of 106 genes, 25.5%	405 out of 1768 genes, 22.9%	0.293832
lipid binding	3 out of 106 genes, 2.8%	32 out of 1768 genes, 1.8%	0.300142
transferase activity, transferring one-carbon groups	3 out of 106 genes, 2.8%	33 out of 1768 genes, 1.9%	0.317014
pyrophosphatase activity	8 out of 106 genes, 7.5%	110 out of 1768 genes, 6.2%	0.336919
hydrolase activity, acting on acid anhydrides, in phosphorus-containing anhydrides	8 out of 106 genes, 7.5%	113 out of 1768 genes, 6.4%	0.365173
zinc ion binding	8 out of 106 genes, 7.5%	114 out of 1768 genes, 6.4%	0.374654
hydrolase activity, acting on acid anhydrides	8 out of 106 genes, 7.5%	119 out of 1768 genes, 6.7%	0.422271
flavin adenine dinucleotide binding	2 out of 106 genes, 1.9%	24 out of 1768 genes, 1.4%	0.427052
cobalt ion binding	2 out of 106 genes, 1.9%	24 out of 1768 genes, 1.4%	0.427052
heme binding	3 out of 106 genes, 2.8%	40 out of 1768 genes, 2.3%	0.434053
calcium ion binding	3 out of 106 genes, 2.8%	41 out of 1768 genes, 2.3%	0.450298
oxidoreductase activity, acting on a sulfur group of donors	3 out of 106 genes, 2.8%	41 out of 1768 genes, 2.3%	0.450298
unfolded protein binding	3 out of 106 genes, 2.8%	44 out of 1768 genes, 2.5%	0.49785
oxidoreductase activity, acting on paired donors, with incorporation or reduction of molecular oxygen	2 out of 106 genes, 1.9%	28 out of 1768 genes, 1.6%	0.508298
NADP binding	2 out of 106 genes, 1.9%	28 out of 1768 genes, 1.6%	0.508298
enzyme regulator activity	2 out of 106 genes, 1.9%	30 out of 1768 genes, 1.7%	0.54606
protein binding	14 out of 106 genes, 13.2%	234 out of 1768 genes, 13.2%	0.54965
ATP binding	15 out of 106 genes, 14.2%	256 out of 1768 genes, 14.5%	0.584301
adenyl nucleotide binding	15 out of 106 genes, 14.2%	257 out of 1768 genes, 14.5%	0.590906
adenyl ribonucleotide binding	15 out of 106 genes, 14.2%	257 out of 1768 genes, 14.5%	0.590906
NAD binding	2 out of 106 genes, 1.9%	34 out of 1768 genes, 1.9%	0.615424
purine ribonucleoside triphosphate binding	17 out of 106 genes, 16.0%	301 out of 1768 genes, 17.0%	0.651758
nucleoside binding	17 out of 106 genes, 16.0%	302 out of 1768 genes, 17.1%	0.657586
purine nucleoside binding	17 out of 106 genes, 16.0%	302 out of 1768 genes, 17.1%	0.657586
purine nucleotide binding	17 out of 106 genes, 16.0%	302 out of 1768 genes, 17.1%	0.657586
ribonucleoside binding	17 out of 106 genes, 16.0%	302 out of 1768 genes, 17.1%	0.657586
purine ribonucleoside binding	17 out of 106 genes, 16.0%	302 out of 1768 genes, 17.1%	0.657586
purine ribonucleotide binding	17 out of 106 genes, 16.0%	302 out of 1768 genes, 17.1%	0.657586
translation factor activity, nucleic acid binding	2 out of 106 genes, 1.9%	37 out of 1768 genes, 2.1%	0.661986
coenzyme binding	6 out of 106 genes, 5.7%	112 out of 1768 genes, 6.3%	0.676437
magnesium ion binding	3 out of 106 genes, 2.8%	58 out of 1768 genes, 3.3%	0.687996
oxidoreductase activity, acting on the CH-OH group of donors, NAD or NADP as acceptor	4 out of 106 genes, 3.8%	80 out of 1768 genes, 4.5%	0.719888
ribonucleotide binding	17 out of 106 genes, 16.0%	315 out of 1768 genes, 17.8%	0.728721
ligase activity	4 out of 106 genes, 3.8%	83 out of 1768 genes, 4.7%	0.746905
serine-type peptidase activity	2 out of 106 genes, 1.9%	45 out of 1768 genes, 2.5%	0.764334
serine hydrolase activity	2 out of 106 genes, 1.9%	45 out of 1768 genes, 2.5%	0.764334
oxidoreductase activity, acting on CH-OH group of donors	4 out of 106 genes, 3.8%	86 out of 1768 genes, 4.9%	0.771924
GTP binding	2 out of 106 genes, 1.9%	48 out of 1768 genes, 2.7%	0.795246
guanyl nucleotide binding	2 out of 106 genes, 1.9%	48 out of 1768 genes, 2.7%	0.795246
guanyl ribonucleotide binding	2 out of 106 genes, 1.9%	48 out of 1768 genes, 2.7%	0.795246
oxidoreductase activity, acting on the CH-CH group of donors	3 out of 106 genes, 2.8%	69 out of 1768 genes, 3.9%	0.795937
hydrolase activity, acting on glycosyl bonds	3 out of 106 genes, 2.8%	73 out of 1768 genes, 4.1%	0.826713
cofactor binding	7 out of 106 genes, 6.6%	153 out of 1768 genes, 8.7%	0.828991
oxidoreductase activity, acting on the CH-CH group of donors, NAD or NADP as acceptor	2 out of 106 genes, 1.9%	57 out of 1768 genes, 3.2%	0.867653
hydrolase activity	21 out of 106 genes, 19.8%	421 out of 1768 genes, 23.8%	0.868734
anion binding	19 out of 106 genes, 17.9%	388 out of 1768 genes, 21.9%	0.877115
phosphotransferase activity, alcohol group as acceptor	2 out of 106 genes, 1.9%	63 out of 1768 genes, 3.6%	0.902093
transferase activity, transferring phosphorus-containing groups	4 out of 106 genes, 3.8%	109 out of 1768 genes, 6.2%	0.905013
kinase activity	3 out of 106 genes, 2.8%	91 out of 1768 genes, 5.1%	0.920982
hydrolase activity, hydrolyzing O-glycosyl compounds	2 out of 106 genes, 1.9%	69 out of 1768 genes, 3.9%	0.92809
transferase activity	12 out of 106 genes, 11.3%	292 out of 1768 genes, 16.5%	0.952944
small molecule binding	25 out of 106 genes, 23.6%	536 out of 1768 genes, 30.3%	0.954554
catalytic activity	66 out of 106 genes, 62.3%	1227 out of 1768 genes, 69.4%	0.958312
nucleotide binding	24 out of 106 genes, 22.6%	524 out of 1768 genes, 29.6%	0.961484
nucleoside phosphate binding	24 out of 106 genes, 22.6%	524 out of 1768 genes, 29.6%	0.961484
