# Supplementary material for: Quantitative proteome-level analysis of paulownia witches’ broom disease with methyl methane sulfonate assistance reveals diverse metabolic changes during the infection and recovery processes
Source: PeerJ. 2017 Jul 3;5:e3495. doi: 10.7717/peerj.3495 (PMC5497676; doi:10.7717/peerj.3495)
Supplement: Table S10 [file peerj-05-3495-s015.xlsx]

## Sheet: Sheet2
Table S10 MMS-related DAPs
Hits	Accession	Desription	NCBInr Identity	NCBInr E_Value	NCBInr Accession	NCBInr Description	Uniprot_Swissprot Identity	Uniprot_Swissprot E_Value	Uniprot_Swissprot Accession	Uniprot_Swissprot Description	Uniprot_Tremble Identity	Uniprot_Tremble E_Value	Uniprot_Tremble Accession	Uniprot_Tremble Description	Protein_or_Domain	COG Identity	COG E-Value	COG_ID	COG Function-Description	COG Code	COG Functional-Categories	KEGG(ko_id|rank|evalue|score|identity|ko_definition)	GO Biological_Process	GO Molecular_Function	GO Cellular_Component
63	CL11786.Contig1_All	182 997 PREDICTED: chlorophyll a-b binding protein 3, chloroplastic-like [Glycine max]	95.34	1e-93	gi|7271947|gb|AAF44703.1|AF241525_1	chlorophyll a/b-binding protein type III [Alonsoa meridionalis]	91.34	7e-125	sp|P27522|CB13_SOLLC	Chlorophyll a-b binding protein 8, chloroplastic OS=Solanum lycopersicum GN=CAB8 PE=3 SV=1	95.34	1e-92	Q9M538	Q9M538_ALOME Chlorophyll a/b-binding protein type III (Fragment) OS=Alonsoa meridionalis PE=2 SV=1	-	-	-	-	-	-	-	K08909|1|4e-122|435|aly:ARALYDRAFT_475174|light-harvesting complex I chlorophyll a/b binding protein 3	GO:0009765//photosynthesis, light harvesting;GO:0019344//cysteine biosynthetic process	GO:0016168//chlorophyll binding	GO:0010287//plastoglobule;GO:0030076//light-harvesting complex;GO:0009535//chloroplast thylakoid membrane
14	CL9190.Contig2_All	136 870 chlorophyll A/B binding protein, putative [Ricinus communis] >gi|223526931|gb|EEF29136.1| chlorophyll A/B binding protein, putative [Ricinus communis]	95.86	8e-92	gi|7271945|gb|AAF44702.1|AF241524_1	chlorophyll a/b-binding protein type I [Asarina barclaiana]	85.48	1e-109	sp|Q01667|CAB6_ARATH	Chlorophyll a-b binding protein 6, chloroplastic OS=Arabidopsis thaliana GN=LHCA1 PE=1 SV=1	95.86	8e-91	Q9M539	Q9M539_9LAMI Chlorophyll a/b-binding protein type I (Fragment) OS=Asarina barclaiana PE=2 SV=1	-	-	-	-	-	-	-	K08907|1|2e-116|416|rcu:RCOM_0333020|light-harvesting complex I chlorophyll a/b binding protein 1	GO:0009744//response to sucrose stimulus;GO:0010114//response to red light;GO:0006364//rRNA processing;GO:0018298//protein-chromophore linkage;GO:0009637//response to blue light;GO:0010155//regulation of proton transport;GO:0009768//photosynthesis, light harvesting in photosystem I;GO:0010218//response to far red light;GO:0009644//response to high light intensity	GO:0016168//chlorophyll binding;GO:0046872//metal ion binding	GO:0009522//photosystem I;GO:0030076//light-harvesting complex;GO:0016021//integral to membrane;GO:0009941//chloroplast envelope;GO:0009535//chloroplast thylakoid membrane;GO:0009523//photosystem II;GO:0010287//plastoglobule
46	CL7358.Contig1_All	353 1471 minus strand PREDICTED: ATP synthase gamma chain, chloroplastic-like isoform 1 [Glycine max] >gi|356548955|ref|XP_003542864.1| PREDICTED: ATP synthase gamma chain, chloroplastic-like isoform 2 [Glycine max] >gi|356548957|ref|XP_00354286	100	4e-30	gi|124294683|gb|ABN03943.1|	chloroplastic ATP synthase gamma subunit [Glycine max]	98.25	2e-50	sp|Q2LGZ2|ATPG_VIGUN	ATP synthase subunit gamma, chloroplastic (Fragment) OS=Vigna unguiculata PE=1 SV=1	96.49	4e-47	Q2LGI6	Q2LGI6_ARAHY ATP synthase gamma subunit (Fragment) OS=Arachis hypogaea GN=ATPC1 PE=2 SV=1	all0004	363	2e-100	COG0224	F0F1-type ATP synthase, gamma subunit	C	Energy production and conversion ;	K02115|1|2e-168|589|gmx:100797290|F-type H+-transporting ATPase subunit gamma [EC:3.6.3.14]	GO:0009108//coenzyme biosynthetic process;GO:0009695//jasmonic acid biosynthetic process;GO:0009965//leaf morphogenesis;GO:0043085//positive regulation of catalytic activity;GO:0019344//cysteine biosynthetic process;GO:0009072//aromatic amino acid family metabolic process;GO:0042777//plasma membrane ATP synthesis coupled proton transport;GO:0009772//photosynthetic electron transport in photosyste…	GO:0030234//enzyme regulator activity;GO:0046961//proton-transporting ATPase activity, rotational mechanism;GO:0005524//ATP binding;GO:0046933//proton-transporting ATP synthase activity, rotational mechanism	GO:0009544//chloroplast ATP synthase complex;GO:0045261//proton-transporting ATP synthase complex, catalytic core F(1);GO:0009941//chloroplast envelope;GO:0005886//plasma membrane
53	CL606.Contig1_All	98 430 RecName: Full=Cytochrome c	96.77	5e-11	gi|414864770|tpg|DAA43327.1|	TPA: hypothetical protein ZEAMMB73_671686 [Zea mays]	95.5	3e-59	sp|P00054|CYC_SESIN	Cytochrome c OS=Sesamum indicum PE=1 SV=1	92.79	5e-55	C6TJ91	C6TJ91_SOYBN Uncharacterized protein OS=Glycine max GN=Gma.56306 PE=3 SV=1	SPCC191.07	139	9e-34	COG3474	Cytochrome c2	C	Energy production and conversion ;	K08738|1|2e-57|218|osa:4338825|cytochrome c	GO:0022900//electron transport chain	GO:0020037//heme binding;GO:0005506//iron ion binding;GO:0009055//electron carrier activity	GO:0070469//respiratory chain;GO:0005739//mitochondrion
1	Unigene7821_All	70 606 minus strand ribulose-1,5-bisphosphate carboxylase/oxygenase small subunit [Panax ginseng]	84.21	5e-74	gi|462411201|gb|EMJ16250.1|	hypothetical protein PRUPE_ppa012123mg [Prunus persica]	84.42	5e-35	sp|P13951|RBS_SINAL	Ribulose bisphosphate carboxylase small chain (Fragment) OS=Sinapis alba GN=RBCS PE=3 SV=1	83.66	9e-73	D1MZ06	D1MZ06_EUCGL Ribulose bisphosphate carboxylase small chain OS=Eucalyptus globulus GN=EgRBCS1 PE=2 SV=1	slr0012	105	4e-23	COG4451	Ribulose bisphosphate carboxylase small subunit	C	Energy production and conversion ;	K01602|1|2e-73|272|pop:POPTR_813777|ribulose-bisphosphate carboxylase small chain [EC:4.1.1.39]	GO:0055114//oxidation-reduction process;GO:0010114//response to red light;GO:0009409//response to cold;GO:0015977//carbon fixation;GO:0009637//response to blue light;GO:0015979//photosynthesis;GO:0009853//photorespiration;GO:0010218//response to far red light	GO:0005507//copper ion binding;GO:0016984//ribulose-bisphosphate carboxylase activity;GO:0004497//monooxygenase activity	GO:0005618//cell wall;GO:0031977//thylakoid lumen;GO:0009941//chloroplast envelope;GO:0009535//chloroplast thylakoid membrane;GO:0009570//chloroplast stroma;GO:0022626//cytosolic ribosome;GO:0048046//apoplast
14	Unigene7925_All	231 2003 cytosolic NADP-malic enzyme [Nicotiana tabacum]	88.31	0	gi|296081563|emb|CBI20568.3|	unnamed protein product [Vitis vinifera]	87.31	0	sp|P51615|MAOX_VITVI	NADP-dependent malic enzyme OS=Vitis vinifera PE=2 SV=1	87.95	0	C8ZK10	C8ZK10_9POAL Malic enzyme (Fragment) OS=Cyrtococcum patens GN=nadpme-II PE=2 SV=1	STM1566	423	4e-118	COG0281	Malic enzyme	C	Energy production and conversion ;	K00029|1|0.0|1056|vvi:100233140|malate dehydrogenase (oxaloacetate-decarboxylating)(NADP+) [EC:1.1.1.40]	GO:0051260//protein homooligomerization;GO:0006108//malate metabolic process;GO:0055114//oxidation-reduction process	GO:0046872//metal ion binding;GO:0051287//NAD binding;GO:0016619//malate dehydrogenase (oxaloacetate-decarboxylating) activity	-
60	CL8958.Contig1_All	120 707 PREDICTED: 40S ribosomal protein S9-2-like [Glycine max]	97.3	6e-14	gi|297725883|ref|NP_001175305.1|	Os07g0628300 [Oryza sativa Japonica Group] >gi|255677988|dbj|BAH94033.1| Os07g0628300 [Oryza sativa Japonica Group]	93.22	2e-25	sp|P49214|RS9_TOBAC	40S ribosomal protein S9 (Fragment) OS=Nicotiana tabacum GN=RPS9 PE=3 SV=1	97.21	3e-96	Q60CZ2	Q60CZ2_SOLDE 40S ribosomal protein S9 , putative OS=Solanum demissum GN=SDM1_52t00012 PE=3 SV=1	SPBC29A3.12	257	8e-69	COG0522	Ribosomal protein S4 and related proteins	J	Translation, ribosomal structure and biogenesis ;	K02997|1|7e-98|353|rcu:RCOM_0855200|small subunit ribosomal protein S9e	GO:0006412//translation	GO:0003735//structural constituent of ribosome;GO:0019843//rRNA binding	GO:0005730//nucleolus;GO:0005886//plasma membrane;GO:0005618//cell wall;GO:0005774//vacuolar membrane;GO:0022627//cytosolic small ribosomal subunit;GO:0009507//chloroplast
61	CL3974.Contig3_All	88 654 RecName: Full=50S ribosomal protein L12, chloroplastic; AltName: Full=CL12; Flags: Precursor >gi|248303|gb|AAB21989.1| ribosomal protein L12 [Nicotiana sylvestris] >Unigene25938_All 88 654 minus strand RecName: Full=50S ribosomal prote	93.18	3e-15	gi|449532439|ref|XP_004173188.1|	PREDICTED: 50S ribosomal protein L12, chloroplastic-like, partial [Cucumis sativus]	77.02	2e-49	sp|P36688|RK12_NICSY	50S ribosomal protein L12, chloroplastic OS=Nicotiana sylvestris PE=2 SV=1	88.89	9e-09	B6TRQ9	B6TRQ9_MAIZE Putative uncharacterized protein OS=Zea mays PE=4 SV=1	sll1746	103	2e-22	COG0222	Ribosomal protein L7/L12	J	Translation, ribosomal structure and biogenesis ;	K02935|1|1e-39|160|vvi:100257626|large subunit ribosomal protein L7/L12	GO:0006412//translation;GO:0042742//defense response to bacterium	-	GO:0009295//nucleoid;GO:0009506//plasmodesma;GO:0009941//chloroplast envelope;GO:0015934//large ribosomal subunit;GO:0009535//chloroplast thylakoid membrane;GO:0009570//chloroplast stroma
39	Unigene23782_All	154 975 RecName: Full=50S ribosomal protein L4, chloroplastic; AltName: Full=CL4; AltName: Full=R-protein L4; Flags: Precursor >gi|3298439|dbj|BAA31510.1| chloroplast ribosomal protein L4 [Nicotiana tabacum]	82.33	9e-98	gi|460397520|ref|XP_004244315.1|	PREDICTED: 50S ribosomal protein L4, chloroplastic-like isoform 2 [Solanum lycopersicum]	79.91	7e-101	sp|O80361|RK4_TOBAC	50S ribosomal protein L4, chloroplastic OS=Nicotiana tabacum GN=RPL4 PE=2 SV=1	76.7	2e-82	I1JMQ2	I1JMQ2_SOYBN Uncharacterized protein OS=Glycine max PE=4 SV=1	sll1800	201	1e-51	COG0088	Ribosomal protein L4	J	Translation, ribosomal structure and biogenesis ;	K02926|1|4e-91|332|rcu:RCOM_0611440|large subunit ribosomal protein L4	GO:0006412//translation;GO:0006355//regulation of transcription, DNA-dependent;GO:0006353//DNA-dependent transcription, termination	GO:0008266//poly(U) RNA binding;GO:0019843//rRNA binding;GO:0003735//structural constituent of ribosome	GO:0009547//plastid ribosome;GO:0009535//chloroplast thylakoid membrane;GO:0009570//chloroplast stroma;GO:0022626//cytosolic ribosome;GO:0005634//nucleus
64	CL14049.Contig1_All	94 615 hypothetical protein VITISV_011749 [Vitis vinifera]	96.15	8e-08	gi|297738430|emb|CBI27631.3|	unnamed protein product [Vitis vinifera]	92.22	6e-82	sp|Q93VI3|RL171_ARATH	60S ribosomal protein L17-1 OS=Arabidopsis thaliana GN=RPL17A PE=1 SV=1	94.83	7e-86	F4YF96	F4YF96_CAMSI Ribosomal petrp-like protein OS=Camellia sinensis PE=2 SV=1	YKL180w	203	9e-53	COG0091	Ribosomal protein L22	J	Translation, ribosomal structure and biogenesis ;	K02880|1|1e-87|320|gmx:100305777|large subunit ribosomal protein L17e	GO:0006508//proteolysis;GO:0006412//translation	GO:0008233//peptidase activity;GO:0003735//structural constituent of ribosome	GO:0005730//nucleolus;GO:0005773//vacuole;GO:0005886//plasma membrane;GO:0022625//cytosolic large ribosomal subunit;GO:0009507//chloroplast
51	CL5429.Contig1_All	130 531 60S ribosomal protein L12A [Hevea brasiliensis]	97.76	2e-68	gi|224075603|ref|XP_002335849.1|	predicted protein [Populus trichocarpa] >gi|224118776|ref|XP_002331443.1| predicted protein [Populus trichocarpa] >gi|224148304|ref|XP_002336628.1| predicted protein [Populus trichocarpa] >gi|118483949|gb|ABK93863.1| unknown [Populus trichocarpa] >gi|118484587|gb|ABK94167.1| unknown [Populus trichocarpa] >gi|118488937|gb|ABK96277.1| unknown [Populus trichocarpa x Populus deltoides] >gi|222835809|…	92.54	2e-66	sp|Q9FF52|RL123_ARATH	60S ribosomal protein L12-3 OS=Arabidopsis thaliana GN=RPL12C PE=2 SV=1	97.76	3e-67	A9PIS4	A9PIS4_9ROSI Putative uncharacterized protein OS=Populus trichocarpa x Populus deltoides PE=2 SV=1	SPCC31H12.04c	204	4e-53	COG0080	Ribosomal protein L11	J	Translation, ribosomal structure and biogenesis ;	K02870|1|3e-70|260|vvi:100267052|large subunit ribosomal protein L12e	GO:0009409//response to cold;GO:0006412//translation	GO:0003735//structural constituent of ribosome;GO:0008270//zinc ion binding	GO:0005730//nucleolus;GO:0022626//cytosolic ribosome;GO:0005773//vacuole;GO:0009507//chloroplast;GO:0016020//membrane
27	Unigene20192_All	148 759 50S ribosomal protein L11 [Arabidopsis thaliana] >gi|38605500|sp|Q9MAP3.1|RK11_ARATH RecName: Full=50S ribosomal protein L11, chloroplastic; AltName: Full=CL11; Flags: Precursor >gi|6910575|gb|AAF31280.1|AC006424_9 Very similar to Spinaci	91.53	4e-57	gi|217069840|gb|ACJ83280.1|	unknown [Medicago truncatula]	85.87	1e-76	sp|Q9MAP3|RK11_ARATH	50S ribosomal protein L11, chloroplastic OS=Arabidopsis thaliana GN=RPL11 PE=1 SV=1	91.53	4e-56	B7FF90	B7FF90_MEDTR Putative uncharacterized protein (Fragment) OS=Medicago truncatula PE=2 SV=1	alr5300	201	5e-52	COG0080	Ribosomal protein L11	J	Translation, ribosomal structure and biogenesis ;	K02867|1|3e-77|285|ath:AT1G32990|large subunit ribosomal protein L11	GO:0006412//translation;GO:0006364//rRNA processing;GO:0019288//isopentenyl diphosphate biosynthetic process, mevalonate-independent pathway;GO:0015995//chlorophyll biosynthetic process;GO:0010027//thylakoid membrane organization	GO:0019843//rRNA binding;GO:0003735//structural constituent of ribosome	GO:0009941//chloroplast envelope;GO:0009570//chloroplast stroma;GO:0022625//cytosolic large ribosomal subunit;GO:0016020//membrane
4	CL7763.Contig1_All	62 724 minus strand PREDICTED: 60S ribosomal protein L10 isoform 2 [Vitis vinifera] >gi|225425354|ref|XP_002275270.1| PREDICTED: 60S ribosomal protein L10 isoform 1 [Vitis vinifera] >Unigene27418_All 102 764 minus strand PREDICTED: 60S ribos	100	5e-06	gi|194700722|gb|ACF84445.1|	unknown [Zea mays]	93.15	1e-118	sp|P93847|RL10_SOLME	60S ribosomal protein L10 OS=Solanum melongena GN=RPL10 PE=2 SV=1	95.02	7e-121	F6HJ95	F6HJ95_VITVI Putative uncharacterized protein OS=Vitis vinifera GN=VIT_01s0150g00580 PE=4 SV=1	SPAP7G5.05	298	4e-81	COG0197	Ribosomal protein L16/L10E	J	Translation, ribosomal structure and biogenesis ;	K02866|1|2e-123|439|vvi:100241995|large subunit ribosomal protein L10e	GO:0006412//translation;GO:0071493//cellular response to UV-B;GO:0032502//developmental process	GO:0003735//structural constituent of ribosome	GO:0005730//nucleolus;GO:0009941//chloroplast envelope;GO:0005773//vacuole;GO:0022625//cytosolic large ribosomal subunit;GO:0005886//plasma membrane
37	CL5894.Contig1_All	147 866 minus strand PREDICTED: putative oxygen evolving enhancer protein [Vitis vinifera] >gi|296086290|emb|CBI31731.3| unnamed protein product [Vitis vinifera]	83.46	7e-62	gi|37927457|gb|AAP69816.1|	putative oxygen evolving enhancer protein [Vitis vinifera]	80	1e-06	sp|P82537|TL1X_SPIOL	Thylakoid lumenal 17 kDa protein (Fragment) OS=Spinacia oleracea PE=1 SV=1	83.46	7e-61	Q6XGX7	Q6XGX7_VITVI Putative oxygen evolving enhancer protein (Fragment) OS=Vitis vinifera GN=PsbP2 PE=2 SV=1	-	-	-	-	-	-	-	K02717|1|3e-100|362|vvi:100259776|photosystem II oxygen-evolving enhancer protein 2	GO:0010103//stomatal complex morphogenesis;GO:0006098//pentose-phosphate shunt;GO:0006364//rRNA processing;GO:0009657//plastid organization;GO:0010207//photosystem II assembly;GO:0043085//positive regulation of catalytic activity	GO:0005509//calcium ion binding	GO:0030095//chloroplast photosystem II;GO:0019898//extrinsic to membrane;GO:0009654//oxygen evolving complex;GO:0009543//chloroplast thylakoid lumen
31	CL4504.Contig1_All	87 881 minus strand predicted protein [Populus trichocarpa] >gi|118485159|gb|ABK94442.1| unknown [Populus trichocarpa] >gi|222857851|gb|EEE95398.1| predicted protein [Populus trichocarpa]	84.91	1e-98	gi|224124634|ref|XP_002330072.1|	predicted protein [Populus trichocarpa] >gi|222871497|gb|EEF08628.1| predicted protein [Populus trichocarpa]	68.11	3e-92	sp|O23403|PPD1_ARATH	PsbP domain-containing protein 1, chloroplastic OS=Arabidopsis thaliana GN=PPD1 PE=1 SV=1	84.91	1e-97	B9N469	B9N469_POPTR Predicted protein (Fragment) OS=Populus trichocarpa GN=POPTRDRAFT_268246 PE=4 SV=1	-	-	-	-	-	-	-	K02717|1|2e-10|64.3|vvi:100259776|photosystem II oxygen-evolving enhancer protein 2	GO:0015979//photosynthesis	GO:0005509//calcium ion binding	GO:0030095//chloroplast photosystem II;GO:0009543//chloroplast thylakoid lumen;GO:0019898//extrinsic to membrane;GO:0009570//chloroplast stroma;GO:0009654//oxygen evolving complex
51	CL10469.Contig1_All	121 1188 photosystem II protein D1 [Phaseolus vulgaris]	100	0	gi|325072106|gb|ADY76095.1|	PsbA [Paulownia tomentosa]	99.43	0	sp|A4GYN9|PSBA_POPTR	Photosystem Q(B) protein OS=Populus trichocarpa GN=psbA PE=2 SV=1	100	0	F1KC27	F1KC27_PAUTO Photosystem Q(B) protein OS=Paulownia tomentosa GN=psbA PE=3 SV=1	-	-	-	-	-	-	-	K02703|1|0.0|678|pop:Poptr_cp001|photosystem II P680 reaction center D1 protein	GO:0009772//photosynthetic electron transport in photosystem II;GO:0009635//response to herbicide	GO:0016491//oxidoreductase activity;GO:0045156//electron transporter, transferring electrons within the cyclic electron transport pathway of photosynthesis activity;GO:0005506//iron ion binding	GO:0030076//light-harvesting complex;GO:0009523//photosystem II;GO:0016021//integral to membrane;GO:0009535//chloroplast thylakoid membrane
6	CL832.Contig4_All	302 2551 minus strand psaA gene product (chloroplast) [Sesamum indicum] >gi|347448295|gb|AEO92706.1| photosystem I P700 chlorophyll a apoprotein A1 (chloroplast) [Sesamum indicum]	99.87	0	gi|442742963|ref|YP_007353915.1|	photosystem I P700 chlorophyll a apoprotein A1 (chloroplast) [Tectona grandis] >gi|438687604|emb|CCP47130.1| photosystem I P700 chlorophyll a apoprotein A1 (chloroplast) [Tectona grandis] >gi|438688288|emb|CCP47219.1| photosystem I P700 chlorophyll a apoprotein A1 (chloroplast) [Tectona grandis] >gi|438688412|emb|CCP47308.1| photosystem I P700 chlorophyll a apoprotein A1 (chloroplast) [Tectona gr…	99.47	0	sp|A0A335|PSAA_COFAR	Photosystem I P700 chlorophyll a apoprotein A1 OS=Coffea arabica GN=psaA PE=3 SV=1	99.73	0	G9IB62	G9IB62_SESIN Photosystem I P700 chlorophyll a apoprotein A1 OS=Sesamum indicum GN=psaA PE=3 SV=1	-	-	-	-	-	-	-	K02689|1|0.0|1443|vvi:4025091|photosystem I P700 chlorophyll a apoprotein A1	GO:0018298//protein-chromophore linkage;GO:0015979//photosynthesis;GO:0022900//electron transport chain	GO:0016491//oxidoreductase activity;GO:0009055//electron carrier activity;GO:0000287//magnesium ion binding;GO:0016168//chlorophyll binding;GO:0051539//4 iron, 4 sulfur cluster binding	GO:0016021//integral to membrane;GO:0009522//photosystem I;GO:0009535//chloroplast thylakoid membrane
15	CL11278.Contig2_All	108 1757 PREDICTED: ATP synthase subunit beta, mitochondrial-like [Vitis vinifera]	98.57	0	gi|297737737|emb|CBI26938.3|	unnamed protein product [Vitis vinifera]	96.89	0	sp|P17614|ATPBM_NICPL	ATP synthase subunit beta, mitochondrial OS=Nicotiana plumbaginifolia GN=ATPB PE=1 SV=1	97.3	0	F6HFL0	F6HFL0_VITVI ATP synthase subunit beta OS=Vitis vinifera GN=VIT_01s0011g04490 PE=3 SV=1	SPAC222.12c	730	0	COG0055	F0F1-type ATP synthase, beta subunit	C	Energy production and conversion ;	K02133|1|0.0|951|bdi:100843462|F-type H+-transporting ATPase subunit beta [EC:3.6.3.14]	GO:0015991//ATP hydrolysis coupled proton transport;GO:0042777//plasma membrane ATP synthesis coupled proton transport;GO:0046686//response to cadmium ion;GO:0006200//ATP catabolic process;GO:0006979//response to oxidative stress	GO:0046961//proton-transporting ATPase activity, rotational mechanism;GO:0008270//zinc ion binding;GO:0008553//hydrogen-exporting ATPase activity, phosphorylative mechanism;GO:0046933//proton-transporting ATP synthase activity, rotational mechanism;GO:0050897//cobalt ion binding;GO:0008266//poly(U) RNA binding;GO:0005507//copper ion binding;GO:0005524//ATP binding	GO:0009941//chloroplast envelope;GO:0005730//nucleolus;GO:0005747//mitochondrial respiratory chain complex I;GO:0005754//mitochondrial proton-transporting ATP synthase, catalytic core;GO:0005886//plasma membrane
16	CL6284.Contig5_All	33 1190 PREDICTED: quinone oxidoreductase-like protein At1g23740, chloroplastic-like [Vitis vinifera]	83.65	1e-65	gi|255635588|gb|ACU18144.1|	unknown [Glycine max]	73.03	4e-104	sp|Q9ZUC1|QORL_ARATH	Quinone oxidoreductase-like protein At1g23740, chloroplastic OS=Arabidopsis thaliana GN=At1g23740 PE=1 SV=2	83.65	1e-64	C6T8J2	C6T8J2_SOYBN Putative uncharacterized protein OS=Glycine max PE=2 SV=1	lin0622	185	1e-46	COG0604	NADPH:quinone reductase and related Zn-dependent oxidoreductases	CR	Energy production and conversion ; General function prediction only ;	-	GO:0009072//aromatic amino acid family metabolic process;GO:0000096//sulfur amino acid metabolic process;GO:0016117//carotenoid biosynthetic process;GO:0006636//unsaturated fatty acid biosynthetic process;GO:0010264//myo-inositol hexakisphosphate biosynthetic process;GO:0044272//sulfur compound biosynthetic process;GO:0019288//isopentenyl diphosphate biosynthetic process, mevalonate-independent p…	GO:0035671//enone reductase activity;GO:0035798//2-alkenal reductase (NADP+) activity;GO:0005488//binding	GO:0009941//chloroplast envelope;GO:0048046//apoplast;GO:0010319//stromule;GO:0009570//chloroplast stroma;GO:0009579//thylakoid
10	CL3436.Contig2_All	296 883 minus strand predicted protein [Populus trichocarpa] >gi|222858897|gb|EEE96444.1| predicted protein [Populus trichocarpa] >Unigene891_All 245 832 minus strand predicted protein [Populus trichocarpa] >gi|222858897|gb|EEE96444.1| predi	82.54	2e-34	gi|449461293|ref|XP_004148376.1|	PREDICTED: remorin-like [Cucumis sativus]	81.13	3e-40	sp|P93788|REMO_SOLTU	Remorin OS=Solanum tuberosum PE=1 SV=1	82.54	9e-32	G8A207	G8A207_MEDTR Remorin OS=Medicago truncatula GN=MTR_128s0001 PE=4 SV=1	-	-	-	-	-	-	-	-	GO:0042546//cell wall biogenesis	-	GO:0044464//cell part
18	CL1080.Contig1_All	241 990 minus strand PREDICTED: fasciclin-like arabinogalactan protein 7 isoform 2 [Vitis vinifera] >gi|225446997|ref|XP_002266986.1| PREDICTED: fasciclin-like arabinogalactan protein 7 isoform 3 [Vitis vinifera] >gi|225446999|ref|XP_002266893.1	84.44	1e-37	gi|92429507|gb|ABD93500.2|	cell adhesion protein [Petunia axillaris subsp. parodii]	72.85	9e-61	sp|Q9SJ81|FLA7_ARATH	Fasciclin-like arabinogalactan protein 7 OS=Arabidopsis thaliana GN=FLA7 PE=1 SV=1	84.44	1e-36	Q1W7H0	Q1W7H0_PETPA Cell adhesion protein (Fragment) OS=Petunia parodii GN=At2g04780 PE=4 SV=2	-	-	-	-	-	-	-	-	GO:0016132//brassinosteroid biosynthetic process;GO:0010075//regulation of meristem growth;GO:0006084//acetyl-CoA metabolic process;GO:0009664//plant-type cell wall organization;GO:0009832//plant-type cell wall biogenesis;GO:0016126//sterol biosynthetic process	-	GO:0046658//anchored to plasma membrane
41	CL13426.Contig3_All	97 507 predicted protein [Arabidopsis lyrata subsp. lyrata] >gi|297328858|gb|EFH59277.1| predicted protein [Arabidopsis lyrata subsp. lyrata]	-	-	-	-	-	-	-	-	-	-	-	-	-	-	-	-	-	-	-	-	-	-
5	Unigene1977_All	78 566 minus strand PREDICTED: uncharacterized protein LOC100254752 [Vitis vinifera]	60.74	1e-38	gi|225426477|ref|XP_002277018.1|	PREDICTED: uncharacterized protein LOC100254752 [Vitis vinifera]	-	-	-	-	60.74	1e-37	F6HUA8	F6HUA8_VITVI Putative uncharacterized protein OS=Vitis vinifera GN=VIT_02s0025g03190 PE=4 SV=1	-	-	-	-	-	-	-	-	-	-
17	Unigene8870_All	194 508 minus strand peptidase, putative [Ricinus communis] >gi|223533818|gb|EEF35549.1| peptidase, putative [Ricinus communis]	79.63	2e-16	gi|224151492|ref|XP_002337112.1|	predicted protein [Populus trichocarpa] >gi|222838300|gb|EEE76665.1| predicted protein [Populus trichocarpa]	-	-	-	-	79.63	2e-15	B9P7Y7	B9P7Y7_POPTR Predicted protein (Fragment) OS=Populus trichocarpa GN=POPTRDRAFT_748592 PE=4 SV=1	-	-	-	-	-	-	-	-	GO:0006661//phosphatidylinositol biosynthetic process;GO:0006508//proteolysis;GO:0043086//negative regulation of catalytic activity	GO:0042802//identical protein binding;GO:0004252//serine-type endopeptidase activity	GO:0005886//plasma membrane;GO:0005829//cytosol
19	CL6583.Contig1_All	190 684 PREDICTED: uncharacterized protein LOC100262861 [Vitis vinifera] >gi|147815438|emb|CAN63832.1| hypothetical protein VITISV_009130 [Vitis vinifera]	68.75	6e-12	gi|297818006|ref|XP_002876886.1|	hypothetical protein ARALYDRAFT_904624 [Arabidopsis lyrata subsp. lyrata] >gi|297322724|gb|EFH53145.1| hypothetical protein ARALYDRAFT_904624 [Arabidopsis lyrata subsp. lyrata]	-	-	-	-	68.75	6e-11	D7LQH8	D7LQH8_ARALL Putative uncharacterized protein OS=Arabidopsis lyrata subsp. lyrata GN=ARALYDRAFT_904624 PE=4 SV=1	-	-	-	-	-	-	-	-	GO:0006094//gluconeogenesis;GO:0010311//lateral root formation;GO:0009617//response to bacterium;GO:0009651//response to salt stress;GO:0008283//cell proliferation;GO:0006096//glycolysis;GO:0030154//cell differentiation;GO:0046686//response to cadmium ion;GO:0009409//response to cold;GO:0009738//abscisic acid mediated signaling pathway;GO:0009408//response to heat;GO:0006334//nucleosome assembly	GO:0042393//histone binding;GO:0003677//DNA binding;GO:0003682//chromatin binding	GO:0009507//chloroplast;GO:0005829//cytosol;GO:0005634//nucleus
28	Unigene23764_All	48 722 uncharacterized protein LOC100806792 [Glycine max]	92	3e-75	gi|388510406|gb|AFK43269.1|	unknown [Lotus japonicus]	82.39	1e-71	sp|O22160|TL15A_ARATH	Thylakoid lumenal 15 kDa protein 1, chloroplastic OS=Arabidopsis thaliana GN=At2g44920 PE=1 SV=2	91.33	6e-73	B9HMK8	B9HMK8_POPTR Predicted protein OS=Populus trichocarpa GN=POPTRDRAFT_563930 PE=4 SV=1	sll0274	122	3e-28	COG1357	Uncharacterized low-complexity proteins	S	Function unknown ;	-	GO:0006098//pentose-phosphate shunt;GO:0042742//defense response to bacterium;GO:0009409//response to cold;GO:0019288//isopentenyl diphosphate biosynthetic process, mevalonate-independent pathway;GO:0015995//chlorophyll biosynthetic process;GO:0016117//carotenoid biosynthetic process;GO:0006636//unsaturated fatty acid biosynthetic process;GO:0015979//photosynthesis;GO:0043085//positive regulation…	GO:0005515//protein binding	GO:0009535//chloroplast thylakoid membrane;GO:0009543//chloroplast thylakoid lumen
46	Unigene30260_All	75 746 proline-rich protein [Nicotiana alata]	63.7	5e-29	gi|297739408|emb|CBI29537.3|	unnamed protein product [Vitis vinifera]	47.76	1e-16	sp|Q03211|PEXLP_TOBAC	Pistil-specific extensin-like protein OS=Nicotiana tabacum PE=2 SV=1	63.7	4e-28	F6HJS7	F6HJS7_VITVI Putative uncharacterized protein OS=Vitis vinifera GN=VIT_00s0527g00030 PE=4 SV=1	-	-	-	-	-	-	-	-	-	-
6	Unigene2121_All	215 658 minus strand PREDICTED: MLP-like protein 423 [Vitis vinifera] >gi|296086515|emb|CBI32104.3| unnamed protein product [Vitis vinifera]	62.91	7e-50	gi|462424473|gb|EMJ28736.1|	hypothetical protein PRUPE_ppa012809mg [Prunus persica]	46.62	2e-36	sp|Q93VR4|ML423_ARATH	MLP-like protein 423 OS=Arabidopsis thaliana GN=MLP423 PE=1 SV=1	62.16	1e-48	D7TNN1	D7TNN1_VITVI Putative uncharacterized protein OS=Vitis vinifera GN=VIT_01s0026g00570 PE=3 SV=1	-	-	-	-	-	-	-	K14496|1|2e-07|52.8|pop:POPTR_419501|abscisic acid receptor PYR/PYL family	GO:0009607//response to biotic stimulus;GO:0006952//defense response	-	GO:0016020//membrane
65	CL8892.Contig1_All	167 817 unnamed protein product [Vitis vinifera]	95.63	8e-114	gi|224103431|ref|XP_002313053.1|	predicted protein [Populus trichocarpa] >gi|118485510|gb|ABK94609.1| unknown [Populus trichocarpa] >gi|222849461|gb|EEE87008.1| predicted protein [Populus trichocarpa]	93.69	2e-112	sp|P31022|RAB7_PEA	Ras-related protein Rab7 OS=Pisum sativum PE=2 SV=1	95.63	3e-112	B9RBE1	B9RBE1_RICCO Putative uncharacterized protein OS=Ricinus communis GN=RCOM_1674910 PE=3 SV=1	SPAC18G6.03	132	3e-31	COG1100	GTPase SAR1 and related small G proteins	R	General function prediction only ;	K07897|1|6e-115|410|aly:ARALYDRAFT_898258|Ras-related protein Rab-7A	GO:0016192//vesicle-mediated transport;GO:0048767//root hair elongation;GO:0034976//response to endoplasmic reticulum stress;GO:0006457//protein folding;GO:0009651//response to salt stress;GO:0007264//small GTPase mediated signal transduction;GO:0009408//response to heat;GO:0007030//Golgi organization;GO:0007033//vacuole organization;GO:0009644//response to high light intensity;GO:0042542//respon…	GO:0016787//hydrolase activity;GO:0005525//GTP binding	GO:0005794//Golgi apparatus;GO:0005634//nucleus;GO:0005886//plasma membrane
52	Unigene9257_All	73 2511 minus strand PREDICTED: protein TOC75-3, chloroplastic-like [Vitis vinifera]	96.15	1e-21	gi|154259490|gb|ABS72025.1|	putative chloroplast protein translocase, partial [Olea europaea]	85.51	0	sp|Q9STE8|TC753_ARATH	Protein TOC75-3, chloroplastic OS=Arabidopsis thaliana GN=TOC75-3 PE=1 SV=1	96.15	1e-20	B2BGT5	B2BGT5_OLEEU Putative chloroplast protein translocase (Fragment) OS=Olea europaea PE=2 SV=1	alr2269	149	1e-35	COG4775	Outer membrane protein/protective antigen OMA87	M	Cell wall/membrane/envelope biogenesis ;	K07277|1|2e-29|129|ppp:PHYPADRAFT_110734|outer membrane protein	GO:0048598//embryonic morphogenesis;GO:0009658//chloroplast organization;GO:0048481//ovule development;GO:0045037//protein import into chloroplast stroma	GO:0015450//P-P-bond-hydrolysis-driven protein transmembrane transporter activity	GO:0031359//integral to chloroplast outer membrane;GO:0005774//vacuolar membrane;GO:0010006//Toc complex;GO:0005886//plasma membrane
36	CL12059.Contig1_All	275 529 minus strand copper chaperone [Plantago major]	89.55	2e-28	gi|53748477|emb|CAH59420.1|	copper chaperone [Plantago major]	46.77	7e-09	sp|Q9TT99|ATOX1_CANFA	Copper transport protein ATOX1 OS=Canis familiaris GN=ATOX1 PE=3 SV=1	89.55	2e-27	Q5ZF67	Q5ZF67_PLAMJ Copper chaperone OS=Plantago major GN=cch1 PE=4 SV=1	YNL259c	49.7	1e-06	COG2608	Copper chaperone	P	Inorganic ion transport and metabolism ;	K07213|1|6e-28|120|vvi:100247137|copper chaperone	GO:0009965//leaf morphogenesis;GO:0010093//specification of floral organ identity;GO:0010363//regulation of plant-type hypersensitive response;GO:0006261//DNA-dependent DNA replication;GO:0006306//DNA methylation;GO:0009805//coumarin biosynthetic process;GO:0009651//response to salt stress;GO:0016572//histone phosphorylation;GO:0019684//photosynthesis, light reaction;GO:0006342//chromatin silenci…	GO:0016851//magnesium chelatase activity;GO:0044212//transcription regulatory region DNA binding;GO:0016531//copper chaperone activity;GO:0010314//phosphatidylinositol-5-phosphate binding;GO:0008270//zinc ion binding;GO:0018024//histone-lysine N-methyltransferase activity	GO:0009706//chloroplast inner membrane;GO:0010007//magnesium chelatase complex;GO:0005886//plasma membrane;GO:0005739//mitochondrion;GO:0048046//apoplast;GO:0000785//chromatin;GO:0005634//nucleus
48	CL10897.Contig2_All	3 989 minus strand hypothetical protein VITISV_004050 [Vitis vinifera]	69.14	3e-114	gi|147818628|emb|CAN71812.1|	hypothetical protein VITISV_037409 [Vitis vinifera]	33.48	1e-27	sp|P92519|M810_ARATH	Uncharacterized mitochondrial protein AtMg00810 OS=Arabidopsis thaliana GN=AtMg00810 PE=4 SV=1	69.14	3e-113	A5AYD3	A5AYD3_VITVI Putative uncharacterized protein OS=Vitis vinifera GN=VITISV_037409 PE=4 SV=1	-	-	-	-	-	-	-	K05356|1|3e-18|90.5|sbi:SORBI_0011s005450|all-trans-nonaprenyl-diphosphate synthase [EC:2.5.1.84 2.5.1.85]!K04728|2|3e-07|53.9|gmx:100788458|ataxia telangiectasia mutated family protein [EC:2.7.11.1]!K10760|3|3e-06|50.8|vvi:100247527|adenylate isopentenyltransferase (cytokinin synthase)	GO:0008152//metabolic process	GO:0016798//hydrolase activity, acting on glycosyl bonds;GO:0005488//binding	-
35	CL10288.Contig1_All	2073 2690 minus strand heat shock protein 90 [Ipomoea nil]	90.24	7e-86	gi|297738210|emb|CBI27411.3|	unnamed protein product [Vitis vinifera]	47.8	2e-31	sp|P54651|HSC90_DICDI	Heat shock cognate 90 kDa protein OS=Dictyostelium discoideum GN=hspD PE=1 SV=2	87.38	9e-92	D0EWD6	D0EWD6_IPONI Heat shock protein 90 OS=Ipomoea nil PE=2 SV=1	SPAC926.04c	130	2e-30	COG0326	Molecular chaperone, HSP90 family	O	Posttranslational modification, protein turnover, chaperones ;	K04079|1|2e-100|362|pop:POPTR_564455|molecular chaperone HtpG	GO:0009414//response to water deprivation;GO:0006457//protein folding;GO:0009651//response to salt stress;GO:0010157//response to chlorate;GO:0009408//response to heat;GO:0009658//chloroplast organization;GO:0048481//ovule development;GO:0009704//de-etiolation;GO:0009793//embryo development ending in seed dormancy	GO:0005524//ATP binding;GO:0051082//unfolded protein binding	GO:0005829//cytosol;GO:0005739//mitochondrion;GO:0009941//chloroplast envelope;GO:0005774//vacuolar membrane;GO:0009570//chloroplast stroma;GO:0005886//plasma membrane
3	CL4968.Contig5_All	134 2242 minus strand heat shock protein, putative [Ricinus communis] >gi|223547557|gb|EEF49052.1| heat shock protein, putative [Ricinus communis]	96.44	0	gi|460376868|ref|XP_004234218.1|	PREDICTED: heat shock protein 83-like [Solanum lycopersicum]	97.03	0	sp|P36182|HSP82_TOBAC	Heat shock protein 82 (Fragment) OS=Nicotiana tabacum GN=HSP82 PE=2 SV=1	96.35	0	I1L314	I1L314_SOYBN Uncharacterized protein OS=Glycine max GN=Gma.23666 PE=4 SV=1	SPAC926.04c	927	0	COG0326	Molecular chaperone, HSP90 family	O	Posttranslational modification, protein turnover, chaperones ;	K04079|1|0.0|1191|pop:POPTR_592912|molecular chaperone HtpG	GO:0006457//protein folding;GO:0009644//response to high light intensity;GO:0046685//response to arsenic-containing substance;GO:0042542//response to hydrogen peroxide;GO:0009408//response to heat;GO:0009816//defense response to bacterium, incompatible interaction	GO:0005524//ATP binding;GO:0051082//unfolded protein binding	GO:0005886//plasma membrane;GO:0005618//cell wall;GO:0005829//cytosol
11	Unigene9395_All	119 796 elongation factor 1-beta, putative [Ricinus communis] >gi|223537506|gb|EEF39131.1| elongation factor 1-beta, putative [Ricinus communis]	89.66	6e-31	gi|386278566|gb|AFJ04515.1|	elongation factor 1-beta [Vernicia fordii]	85.06	2e-28	sp|P29545|EF1B_ORYSJ	Elongation factor 1-beta OS=Oryza sativa subsp. japonica GN=Os07g0662500 PE=1 SV=3	90.8	3e-30	B3TLP3	B3TLP3_ELAGV Translation elongation factor EF-1 beta chain OS=Elaeis guineensis var. tenera PE=2 SV=1	SPCC1450.04	139	3e-33	COG2092	Translation elongation factor EF-1beta	J	Translation, ribosomal structure and biogenesis ;	K03232|1|3e-33|139|gmx:100500082|elongation factor 1-beta	GO:0006412//translation	-	-
31	Unigene1837_All	284 2449 minus strand PREDICTED: uncharacterized membrane protein C24H6.13-like [Vitis vinifera]	84.82	4e-103	gi|17863981|gb|AAL47004.1|AF448811_1	unknown [Davidia involucrata]	27.41	1e-23	sp|Q03516|RSN1_YEAST	Uncharacterized protein RSN1 OS=Saccharomyces cerevisiae (strain ATCC 204508 / S288c) GN=RSN1 PE=1 SV=1	84.82	4e-102	Q8VWV7	Q8VWV7_DAVIN Putative uncharacterized protein (Fragment) OS=Davidia involucrata PE=4 SV=1	SPAC2G11.09	177	6e-44	COG5594	Uncharacterized integral membrane protein	S	Function unknown ;	K03021|1|6e-06|51.2|ota:Ot01g06000|DNA-directed RNA polymerase III subunit RPC2 [EC:2.7.7.6]	-	-	GO:0009941//chloroplast envelope;GO:0009506//plasmodesma;GO:0016023//cytoplasmic membrane-bounded vesicle;GO:0005886//plasma membrane;GO:0005774//vacuolar membrane;GO:0005576//extracellular region
43	CL12527.Contig2_All	152 571 minus strand unknown [Lotus japonicus]	82.86	4e-53	gi|470128672|ref|XP_004300260.1|	PREDICTED: glycine cleavage system H protein, mitochondrial-like isoform 1 [Fragaria vesca subsp. vesca]	79.29	3e-50	sp|Q9LQL0|GCSH2_ARATH	Probable glycine cleavage system H protein 2, mitochondrial OS=Arabidopsis thaliana GN=At1g32470 PE=1 SV=1	80.71	6e-50	G7JZW9	G7JZW9_MEDTR Glycine cleavage system H protein OS=Medicago truncatula GN=MTR_5g014260 PE=3 SV=1	SA0760	129	1e-30	COG0509	Glycine cleavage system H protein (lipoate-binding)	E	Amino acid transport and metabolism ;	K02437|1|2e-53|205|vvi:100259229|glycine cleavage system H protein	GO:0019464//glycine decarboxylation via glycine cleavage system	GO:0004047//aminomethyltransferase activity	GO:0005960//glycine cleavage complex;GO:0005739//mitochondrion
20	CL9591.Contig1_All	74 706 predicted protein [Populus trichocarpa] >gi|222845172|gb|EEE82719.1| predicted protein [Populus trichocarpa] >CL9591.Contig2_All 82 714 minus strand predicted protein [Populus trichocarpa] >gi|222845172|gb|EEE82719.1| predicted protein	85.53	5e-22	gi|6686802|emb|CAB64723.1|	FKBP like protein [Arabidopsis thaliana]	85	3e-14	sp|P59724|FKBP3_VICFA	FKBP-type peptidyl-prolyl cis-trans isomerase, chloroplastic (Fragment) OS=Vicia faba PE=1 SV=1	71.31	2e-35	F2DBI8	F2DBI8_HORVD Peptidyl-prolyl cis-trans isomerase (Fragment) OS=Hordeum vulgare var. distichum PE=2 SV=1	slr1761	137	1e-32	COG0545	FKBP-type peptidyl-prolyl cis-trans isomerases 1	O	Posttranslational modification, protein turnover, chaperones ;	K01802|1|2e-52|203|ath:AT5G45680|peptidylprolyl isomerase [EC:5.2.1.8]!K14826|4|5e-15|79.0|pop:POPTR_422620|FK506-binding nuclear protein [EC:5.2.1.8]!K09569|5|1e-14|77.8|cre:CHLREDRAFT_120341|FK506-binding protein 2 [EC:5.2.1.8]	GO:0010103//stomatal complex morphogenesis;GO:0018208//peptidyl-proline modification;GO:0019288//isopentenyl diphosphate biosynthetic process, mevalonate-independent pathway;GO:0015995//chlorophyll biosynthetic process;GO:0016117//carotenoid biosynthetic process;GO:0006636//unsaturated fatty acid biosynthetic process	GO:0003755//peptidyl-prolyl cis-trans isomerase activity;GO:0005515//protein binding	GO:0009543//chloroplast thylakoid lumen
35	CL2637.Contig1_All	62 1177 minus strand unknown [Populus trichocarpa]	83.58	2e-61	gi|18419649|gb|AAL69389.1|AF462226_1	putative cysteine proteinase [Narcissus pseudonarcissus]	82.29	3e-46	sp|P05993|PAPA5_CARPA	Cysteine proteinase (Fragment) OS=Carica papaya PE=3 SV=1	82.86	4e-119	Q5ZF63	Q5ZF63_PLAMJ Cysteine protease 2 (Fragment) OS=Plantago major GN=cpr2 PE=2 SV=1	AF1946_2	95.9	1e-19	COG4870	Cysteine protease	O	Posttranslational modification, protein turnover, chaperones ;	K01376|1|6e-147|518|osa:4329339|[EC:3.4.22.-]!K01373|3|9e-121|431|ppp:PHYPADRAFT_209158|cathepsin F [EC:3.4.22.41]	GO:0006508//proteolysis	GO:0008234//cysteine-type peptidase activity	GO:0005773//vacuole
30	Unigene15357_All	154 1608 adenosylhomocysteinase, putative [Ricinus communis] >gi|223538043|gb|EEF39656.1| adenosylhomocysteinase, putative [Ricinus communis]	100	4e-11	gi|298205241|emb|CBI17300.3|	unnamed protein product [Vitis vinifera]	94.64	0	sp|P35007|SAHH_CATRO	Adenosylhomocysteinase OS=Catharanthus roseus GN=SAHH PE=2 SV=1	94.64	0	A5C5K3	A5C5K3_VITVI Adenosylhomocysteinase OS=Vitis vinifera GN=VIT_05s0029g00330 PE=3 SV=1	Rv3248c	601	1e-171	COG0499	S-adenosylhomocysteine hydrolase	H	Coenzyme transport and metabolism ;	K01251|1|0.0|888|rcu:RCOM_0523500|adenosylhomocysteinase [EC:3.3.1.1]	GO:0006730//one-carbon metabolic process;GO:0016441//posttranscriptional gene silencing;GO:0006346//methylation-dependent chromatin silencing	GO:0005507//copper ion binding;GO:0004013//adenosylhomocysteinase activity	GO:0005773//vacuole;GO:0005886//plasma membrane
