# Supplementary material for: Quantitative proteome-level analysis of paulownia witches’ broom disease with methyl methane sulfonate assistance reveals diverse metabolic changes during the infection and recovery processes
Source: PeerJ. 2017 Jul 3;5:e3495. doi: 10.7717/peerj.3495 (PMC5497676; doi:10.7717/peerj.3495)
Supplement: Table S11 [file peerj-05-3495-s016.xlsx]

## Sheet: sheet
Table S11 GO analyses of the DAPs related to PaWB
Ontology	Class	number_of_final	proteins_of_final;
biological_process	biological regulation	8	CL896.Contig2_All; Unigene8870_All; CL4603.Contig2_All; CL8613.Contig1_All; Unigene8915_All; CL4105.Contig3_All; CL5304.Contig1_All; CL7006.Contig1_All;
biological_process	cellular component organization or biogenesis	7	CL4105.Contig3_All; Unigene31051_All; CL13424.Contig1_All; Unigene8915_All; CL5304.Contig1_All; Unigene20234_All; Unigene11415_All;
biological_process	cellular process	29	CL896.Contig2_All; CL2738.Contig1_All; CL13424.Contig1_All; Unigene7821_All; CL4105.Contig3_All; Unigene8915_All; CL4998.Contig1_All; CL7006.Contig1_All; Unigene9539_All; CL5429.Contig1_All; CL5472.Contig1_All; Unigene31090_All; CL4603.Contig2_All; CL1718.Contig1_All; Unigene20234_All; CL8613.Contig1_All; CL12527.Contig2_All; CL832.Contig4_All; CL11274.Contig1_All; CL1900.Contig1_All; CL11786.Con…
biological_process	developmental process	6	CL4105.Contig3_All; CL13424.Contig1_All; CL4391.Contig1_All; CL896.Contig2_All; Unigene31090_All; CL4603.Contig2_All;
biological_process	establishment of localization	1	CL5304.Contig1_All;
biological_process	immune system process	2	CL4968.Contig5_All; CL4105.Contig3_All;
biological_process	localization	1	CL5304.Contig1_All;
biological_process	metabolic process	30	CL896.Contig2_All; CL13424.Contig1_All; Unigene7821_All; CL4105.Contig3_All; Unigene8915_All; CL8613.Contig1_All; CL4998.Contig1_All; CL7006.Contig1_All; Unigene9539_All; CL5429.Contig1_All; CL5472.Contig1_All; Unigene31090_All; Unigene8870_All; CL4603.Contig2_All; CL1718.Contig1_All; Unigene20234_All; CL12527.Contig2_All; CL832.Contig4_All; CL11274.Contig1_All; CL1900.Contig1_All; CL2738.Contig1…
biological_process	multi-organism process	4	CL4968.Contig5_All; CL896.Contig2_All; CL11274.Contig1_All; CL1900.Contig1_All;
biological_process	multicellular organismal process	6	CL4105.Contig3_All; CL13424.Contig1_All; CL4391.Contig1_All; CL896.Contig2_All; Unigene31090_All; CL4603.Contig2_All;
biological_process	positive regulation of biological process	1	CL4603.Contig2_All;
biological_process	regulation of biological process	8	CL896.Contig2_All; Unigene8870_All; CL4603.Contig2_All; CL8613.Contig1_All; Unigene8915_All; CL4105.Contig3_All; CL5304.Contig1_All; CL7006.Contig1_All;
biological_process	reproduction	4	CL4105.Contig3_All; CL13424.Contig1_All; CL4391.Contig1_All; CL896.Contig2_All;
biological_process	reproductive process	4	CL4105.Contig3_All; CL13424.Contig1_All; CL4391.Contig1_All; CL896.Contig2_All;
biological_process	response to stimulus	16	CL2738.Contig1_All; CL4968.Contig5_All; CL896.Contig2_All; CL5304.Contig1_All; Unigene7821_All; CL11274.Contig1_All; CL1900.Contig1_All; CL9243.Contig2_All; Unigene5139_All; CL5429.Contig1_All; Unigene2121_All; Unigene31051_All; Unigene12498_All; Unigene9539_All; CL7006.Contig1_All; CL4105.Contig3_All;
biological_process	signaling	2	CL896.Contig2_All; CL7006.Contig1_All;
biological_process	single-organism process	11	CL2738.Contig1_All; Unigene31090_All; CL4105.Contig3_All; CL13424.Contig1_All; CL4391.Contig1_All; CL8613.Contig1_All; Unigene8915_All; CL896.Contig2_All; CL5304.Contig1_All; CL4603.Contig2_All; CL7006.Contig1_All;
cellular_component	cell	34	CL13424.Contig1_All; CL1900.Contig1_All; CL4391.Contig1_All; CL5710.Contig2_All; CL896.Contig2_All; Unigene7821_All; Unigene31090_All; CL7006.Contig1_All; CL4968.Contig5_All; CL5472.Contig1_All; CL5429.Contig1_All; CL9243.Contig2_All; CL11274.Contig1_All; CL2738.Contig1_All; CL4998.Contig1_All; Unigene12498_All; Unigene31051_All; Unigene8870_All; Unigene9539_All; CL11786.Contig1_All; CL5304.Conti…
cellular_component	cell junction	1	CL5472.Contig1_All;
cellular_component	cell part	34	CL13424.Contig1_All; CL1900.Contig1_All; CL4391.Contig1_All; CL5710.Contig2_All; CL896.Contig2_All; Unigene7821_All; Unigene31090_All; CL7006.Contig1_All; CL4968.Contig5_All; CL5472.Contig1_All; CL5429.Contig1_All; CL9243.Contig2_All; CL11274.Contig1_All; CL2738.Contig1_All; CL4998.Contig1_All; Unigene12498_All; Unigene31051_All; Unigene8870_All; Unigene9539_All; CL11786.Contig1_All; CL5304.Conti…
cellular_component	extracellular region	6	CL1900.Contig1_All; CL4998.Contig1_All; Unigene31051_All; Unigene7821_All; Unigene9539_All; Unigene1547_All;
cellular_component	macromolecular complex	14	Unigene31090_All; CL5429.Contig1_All; CL9243.Contig2_All; Unigene7821_All; CL5472.Contig1_All; CL1900.Contig1_All; Unigene11415_All; CL5304.Contig1_All; CL13424.Contig1_All; CL12527.Contig2_All; CL11786.Contig1_All; Unigene31051_All; Unigene8915_All; CL832.Contig4_All;
cellular_component	membrane	25	CL11274.Contig1_All; CL2738.Contig1_All; CL4968.Contig5_All; CL4998.Contig1_All; Unigene12498_All; Unigene31051_All; Unigene31090_All; Unigene8870_All; Unigene9539_All; CL1900.Contig1_All; Unigene11415_All; CL5304.Contig1_All; CL13424.Contig1_All; CL2226.Contig1_All; CL5429.Contig1_All; CL5472.Contig1_All; CL7006.Contig1_All; Unigene2121_All; CL1718.Contig1_All; CL832.Contig4_All; CL4105.Contig3_…
cellular_component	membrane part	8	CL1900.Contig1_All; Unigene11415_All; CL5304.Contig1_All; CL11274.Contig1_All; CL1718.Contig1_All; CL832.Contig4_All; CL4105.Contig3_All; Unigene8915_All;
cellular_component	membrane-enclosed lumen	3	CL5429.Contig1_All; CL5472.Contig1_All; Unigene31090_All;
cellular_component	organelle	27	CL13424.Contig1_All; CL1900.Contig1_All; CL4391.Contig1_All; CL5710.Contig2_All; CL896.Contig2_All; Unigene7821_All; Unigene31090_All; CL7006.Contig1_All; CL5429.Contig1_All; CL9243.Contig2_All; CL5472.Contig1_All; CL11786.Contig1_All; CL5304.Contig1_All; Unigene20234_All; CL4603.Contig2_All; CL4998.Contig1_All; CL8613.Contig1_All; CL12527.Contig2_All; Unigene5139_All; CL2738.Contig1_All; Unigene…
cellular_component	organelle part	19	CL13424.Contig1_All; CL1900.Contig1_All; CL4391.Contig1_All; CL5710.Contig2_All; CL896.Contig2_All; Unigene7821_All; Unigene31090_All; CL5472.Contig1_All; CL11786.Contig1_All; CL5304.Contig1_All; Unigene20234_All; CL5429.Contig1_All; CL11274.Contig1_All; Unigene8915_All; CL7006.Contig1_All; CL1718.Contig1_All; CL832.Contig4_All; Unigene11415_All; Unigene31051_All;
cellular_component	symplast	1	CL5472.Contig1_All;
molecular_function	antioxidant activity	1	Unigene20234_All;
molecular_function	binding	22	CL1900.Contig1_All; CL1718.Contig1_All; Unigene1547_All; CL4391.Contig1_All; Unigene20234_All; CL11786.Contig1_All; CL5304.Contig1_All; CL832.Contig4_All; Unigene8870_All; CL13424.Contig1_All; CL4968.Contig5_All; Unigene12498_All; Unigene5139_All; CL5429.Contig1_All; CL896.Contig2_All; Unigene7821_All; CL11274.Contig1_All; CL4105.Contig3_All; Unigene31090_All; CL4603.Contig2_All; CL7006.Contig1_A…
molecular_function	catalytic activity	16	CL12527.Contig2_All; CL4998.Contig1_All; CL7006.Contig1_All; Unigene9539_All; CL896.Contig2_All; Unigene31051_All; CL4603.Contig2_All; Unigene7821_All; Unigene8870_All; CL1718.Contig1_All; CL832.Contig4_All; Unigene20234_All; CL11274.Contig1_All; CL8613.Contig1_All; Unigene12498_All; Unigene1547_All;
molecular_function	electron carrier activity	4	CL11274.Contig1_All; CL1718.Contig1_All; CL832.Contig4_All; CL8613.Contig1_All;
molecular_function	nucleic acid binding transcription factor activity	1	CL896.Contig2_All;
molecular_function	structural molecule activity	4	CL13424.Contig1_All; CL5429.Contig1_All; CL5472.Contig1_All; Unigene31090_All;
molecular_function	transporter activity	1	CL11274.Contig1_All;
