# Supplementary material for: Quantitative proteome-level analysis of paulownia witches’ broom disease with methyl methane sulfonate assistance reveals diverse metabolic changes during the infection and recovery processes
Source: PeerJ. 2017 Jul 3;5:e3495. doi: 10.7717/peerj.3495 (PMC5497676; doi:10.7717/peerj.3495)
Supplement: Table S12 [file peerj-05-3495-s017.xlsx]

## Sheet: final.cog2protein
Table S12 COG function classification of the DAPs relatd to PaWB
Code	Functional-Categories	Protein-Number	Proteins
C	Energy production and conversion	4	CL11274.Contig1_All,COG0723	Unigene7821_All,COG4451	CL8613.Contig1_All,COG0526	CL1718.Contig1_All,COG1290
E	Amino acid transport and metabolism	2	CL896.Contig2_All,COG4992	CL12527.Contig2_All,COG0509
G	Carbohydrate transport and metabolism	1	Unigene12498_All,COG0469
J	Translation, ribosomal structure and biogenesis	4	CL5429.Contig1_All,COG0080	CL13424.Contig1_All,COG0097	Unigene31090_All,COG0256	CL5472.Contig1_All,COG0051
K	Transcription	1	CL9243.Contig2_All,COG1308
O	Posttranslational modification, protein turnover, chaperones	10	CL4391.Contig1_All,COG0576	Unigene9539_All,COG0652	CL8613.Contig1_All,COG0526	CL8613.Contig1_All,COG3118	CL4968.Contig5_All,COG0326	Unigene20234_All,COG1225	Unigene31051_All,COG0638	Unigene5139_All,COG0234	CL7006.Contig1_All,COG0545	CL4998.Contig1_All,COG0652
R	General function prediction only	1	CL2738.Contig1_All,COG0457
