# Supplementary material for: Quantitative proteome-level analysis of paulownia witches’ broom disease with methyl methane sulfonate assistance reveals diverse metabolic changes during the infection and recovery processes
Source: PeerJ. 2017 Jul 3;5:e3495. doi: 10.7717/peerj.3495 (PMC5497676; doi:10.7717/peerj.3495)
Supplement: Table S13 [file peerj-05-3495-s018.xlsx]

## Sheet: Sheet1
Table S13 KEGG pathway analysis for the DAPs related to PaWB
	Pathway	Diff Proteins with pathway annotation (30)	Pathway ID
1	Metabolic pathways	11 (36.67%)	ko01100
2	Photosynthesis	6 (20%)	ko00195
3	Ribosome	4 (13.33%)	ko03010
4	Biosynthesis of secondary metabolites	3 (10%)	ko01110
5	Plant-pathogen interaction	2 (6.67%)	ko04626
6	Carbon fixation in photosynthetic organisms	2 (6.67%)	ko00710
7	Photosynthesis - antenna proteins	2 (6.67%)	ko00196
8	Glyoxylate and dicarboxylate metabolism	2 (6.67%)	ko00630
9	Plant hormone signal transduction	1 (3.33%)	ko04075
10	Protein processing in endoplasmic reticulum	1 (3.33%)	ko04141
11	Purine metabolism	1 (3.33%)	ko00230
12	Arginine and proline metabolism	1 (3.33%)	ko00330
13	Glycolysis / Gluconeogenesis	1 (3.33%)	ko00010
14	Pyruvate metabolism	1 (3.33%)	ko00620
15	Lipoic acid metabolism	1 (3.33%)	ko00785
16	Proteasome	1 (3.33%)	ko03050
