# Supplementary material for: Quantitative proteome-level analysis of paulownia witches’ broom disease with methyl methane sulfonate assistance reveals diverse metabolic changes during the infection and recovery processes
Source: PeerJ. 2017 Jul 3;5:e3495. doi: 10.7717/peerj.3495 (PMC5497676; doi:10.7717/peerj.3495)
Supplement: Table S15 — PFa : Fan et al. 491 2015c, PFb : Fan et al., 2014, PTa : Fan et al., 2015b , PTb : Fan et al., 2015a, PTF : Liu et al., 2013. Red: up-regulated; green: down-regulated. [file peerj-05-3495-s020.xlsx]

## Sheet: Sheet1
Table S15 Transcriptome change of the PaWB-realted proteins in previous study
()is references in the manuscript
red: up-regulated; green: down-regulated
this study			PFa (Fan et al. 2015c)		PFb (Fan et al. 2014)		PTa (Fan et al. 2015b)		PTb (Fan et al. 2015a)		PTF (Liu et al. 2013)
Accession	protein abundance change	transcript abundance change	mRNAid	transcript abundance change	mRNAid	transcript abundance change	mRNAid	transcript abundance change	mRNAid	transcript abundance change	mRNA_id	transcript abundance change
CL4603.Contig2_All	down	-1.1338	CL9944.Contig2_All	-0.9522	CL11895.Contig2_All	-0.8609	Unigene19106_All	-0.5587	Unigene1981_All	-1.1631	m.1852	-1.32193
CL5304.Contig1_All	down	-1.0496	CL291.Contig1_All	-1.0571	CL9801.Contig1_All	-1.0544	CL7661.Contig1_All	0.5486	CL2512.Contig4_All	-1.832	m.32987	0.367403
Unigene7821_All	down	-0.901	Unigene3471_All	-0.9087	Unigene14143_All	-0.9057	Unigene23125_All	-0.1228	CL8209.Contig3_All	-1.1198	m.4010	0.982585
CL11786.Contig1_All	down	-0.7708	CL5975.Contig2_All	-0.482	CL521.Contig3_All	-0.7739	CL11978.Contig1_All	0.2557	Unigene4691_All	-0.8588	m.27940	-0.238203
CL13424.Contig1_All	down	-0.7269	CL7399.Contig2_All	-0.8044	CL5807.Contig2_All	-0.8007	CL9505.Contig1_All	-0.8229	CL5538.Contig3_All	-0.9221	m.11192	0.877255
CL5472.Contig1_All	down	-0.5758	CL5432.Contig1_All	-0.6434	CL11656.Contig1_All	-0.8391	CL2778.Contig1_All	-0.8272	CL11768.Contig1_All	-0.8777	m.2976	0.43995
Unigene31090_All	down	-0.5404	Unigene24578_All	0.3238	Unigene12118_All	0.3265	CL8874.Contig2_All	7.8978	CL12229.Contig1_All	-0.0673	m.5447	0.786943
CL8613.Contig1_All	down	-0.5293	CL8430.Contig4_All	-0.5168	CL1206.Contig4_All	-0.7747	CL11529.Contig1_All	-0.8911	Unigene23196_All	-0.87	m.1772	-0.0955445
CL1900.Contig1_All	down	-0.4895	CL8226.Contig2_All	0.4192	CL4313.Contig3_All	-1.0118	Unigene16198_All	-0.5205	CL12360.Contig2_All	-0.0452	m.7798	-0.227582
Unigene11415_All	down	-0.3914	Unigene18158_All	1.0003	Unigene10440_All	-0.3509	Unigene1873_All	-0.4157	Unigene20403_All	0.1032	m.25457	2.70044
CL12527.Contig2_All	down	-0.382	CL8079.Contig2_All	-0.3719	CL11505.Contig2_All	-0.3767	Unigene5912_All	-0.3474	CL1073.Contig3_All	-0.8123	m.1897	0.19777
CL9243.Contig2_All	down	-0.2466	CL8144.Contig2_All	-0.2451	CL12931.Contig1_All	-0.2425	CL11374.Contig2_All	0.6259	Unigene19129_All	-0.6468	m.7650	-0.481112
Unigene20234_All	down	-0.2421	Unigene21396_All	-0.2505	Unigene15675_All	-0.2485	Unigene18948_All	-0.6462	CL181.Contig3_All	-0.6612	m.4669	0.660514
CL7006.Contig1_All	down	-0.2397	CL6517.Contig1_All	-0.1712	CL12379.Contig2_All	-0.3084	Unigene27559_All	-0.4528	Unigene640_All	-0.5391	m.7758	-0.836015
CL832.Contig4_All	down	1.8565	CL3138.Contig2_All	1.9125	Unigene6856_All	1.7854	Unigene13374_All	-2.2081	Unigene1711_All	0.2378	m.1512	0.843067
Unigene1547_All	down	0.7318	Unigene26660_All	0.7216	Unigene32586_All	0.6872	CL3165.Contig1_All	-0.4015	CL7146.Contig2_All	0.0719	m.29971	1.07569
CL2738.Contig1_All	down	1.0786	CL11636.Contig3_All	1.704	CL12564.Contig1_All	1.0399	Unigene1703_All	-0.2793	Unigene10414_All	0.2159	*	*
Unigene30260_All	down	0.2851	Unigene16817_All	0.276	Unigene18842_All	0.2786	CL11531.Contig1_All	-1.4526	CL8175.Contig1_All	-0.1013	m.4778	0.047653
CL2226.Contig1_All	down	0.298	CL9790.Contig4_All	0.4912	CL2368.Contig1_All	0.1655	CL8894.Contig2_All	-1.0373	Unigene4658_All	-0.0047	m.5652	0.226106
CL11274.Contig1_All	down	0.3285	CL3373.Contig1_All	-0.5479	CL5453.Contig1_All	-0.5453	Unigene19329_All	-1.0372	CL11607.Contig2_All	-0.8711	m.7184	0.391257
Unigene9539_All	down	0.4774	Unigene18001_All	0.4748	unigene32709_All	0.4722	Unigene16183_All	-1.7738	CL9584.Contig2_All	-0.0112	m.20457	0.0424772
CL4998.Contig1_All	down	-0.1013	CL2315.Contig3_All	-0.1082	CL927.Contig1_All	-0.1051	Unigene4553_All	-1.8989	Unigene10218_All	-0.3915	m.5244	0.699246
CL5710.Contig2_All	down	0.0396	CL4284.Contig2_All	0.0205	CL9125.Contig1_All	0.0513	Unigene16253_All	-0.218	CL9279.Contig1_All	-0.3727	m.4458	1.64829
CL8143.Contig1_All	down	-0.1267	CL8995.Contig1_All	-0.1381	CL3975.Contig2_All	-0.1355	Unigene19125_All	0.1118	CL10599.Contig1_All	-0.522	m.5183	-0.331081
Unigene12498_All	down	0.1336	Unigene11351_All	0.1268	Unigene18374_All	0.1288	Unigene11744_All	-1.0103	CL5077.Contig1_All	-0.3041	m.23100	*
Unigene8915_All	up	-0.1279	Unigene24488_All	-0.2049	Unigene5520_All	-0.2022	CL4447.Contig4_All	-0.6989	Unigene24974_All	-0.5475	m.8243	-0.512693
CL4391.Contig1_All	up	-0.1079	CL9718.Contig2_All	-0.2159	CL9581.Contig2_All	-0.1344	Unigene22027_All	-0.258	CL5682.Contig1_All	-0.5508
Unigene8870_All	up	0.0612	Unigene10600_All	0.0547	Unigene29251_All	0.0569	Unigene3411_All	-0.4688	Unigene19116_All	-0.3606	m.4056	0.329148
Unigene5139_All	up	0.1561	Unigene26703_All	0.1487	Unigene12423_All	0.1513	CL11209.Contig2_All	-0.2847	CL10161.Contig1_All	-0.288	m.9863	-13.7366
CL896.Contig2_All	up	0.218	CL8344.Contig1_All	0.2274	CL1338.Contig2_All	0.4364	CL9992.Contig2_All	0.2477	CL3293.Contig3_All	-0.1045	m.3548	-0.185616
Unigene31051_All	up	0.2366	Unigene21244_All	0.2183	Unigene29021_All	0.2468	CL2030.Contig3_All	-0.5773	Unigene7345_All	-0.1974	m.1949	-0.319287
CL5429.Contig1_All	up	0.4789	CL8996.Contig1_All	0.7109	CL14041.Contig1_All	0.4678	CL8303.Contig2_All	0.5553	CL4827.Contig1_All	0.0053	m.42174	1.12835
CL1718.Contig1_All	up	1.3007	CL8431.Contig3_All	0.6648	CL8545.Contig2_All	0.8902	CL4951.Contig1_All	-0.2265	Unigene27852_All	0.0021	m.17472	-0.600069
Unigene2121_All	up	1.3633	Unigene5252_All	1.3573	Unigene18985_All	1.3614	CL6055.Contig1_All	*	CL9126.Contig4_All	0.1539	m.6437	*
CL4105.Contig3_All	up	2.2331	CL5880.Contig2_All	2.5926	CL8084.Contig2_All	2.9419	CL4158.Contig1_All	-1.6223	CL9862.Contig1_All	0.2652	m.1676	-0.0222628
CL4968.Contig5_All	up	3.337	Unigene30633_All	3.113	Unigene18872_All	3.891	CL2010.Contig8_All	-0.3411	Unigene15133_All	0.4171	m.40167	14.1643
